# Supplementary material for: Plasma Proteome-Wide Mendelian Randomization Analysis Reveals Biomarkers and Therapeutic Targets for Different Stages of COVID-19
Source: Transbound Emerg Dis. 2024 Feb 5;2024:5566180. doi: 10.1155/2024/5566180 (PMC12017221; doi:10.1155/2024/5566180)
Supplement: Supplementary Materials — Table S1: results of the primary analysis. Table S2: results of the sensitivity analysis. Table S3: results of the reverse-direction MR analysis. Table S4: results of the genetic colocalization analysis. Table S5: instrumental variables used for analysis after harmonization and proxies. Table S6: results of the primary analysis for previously identified protein. [file 5566180.f1.pdf]

Supplementary Table S1: Results of the primary analysis.

| SomaID    | Protein_short                   | Protein_full                                                     | UniProtID | GeneID    | TSS             | Method                    | nsnp | Beta   | SE    | Pval      | Qval  | cis/pan | Outcome         |
|-----------|---------------------------------|------------------------------------------------------------------|-----------|-----------|-----------------|---------------------------|------|--------|-------|-----------|-------|---------|-----------------|
| 10346_5   | STAT3                           | Signal transducer and activator of transcription 3               | P40763    | STAT3     | chr17:42388540  | Inverse variance weighted | 2    | -0.538 | 0.123 | 1.232E-05 | 0.021 | cis     | Severe COVID-19 |
| 12656_1   | KLC1                            | Kinesin light chain 1                                            | Q07866    | KLC1      | chr14:103561896 | Wald ratio                | 1    | 0.701  | 0.170 | 3.910E-05 | 0.033 | cis     | Severe COVID-19 |
| 2580_83   | Myeloperoxidase                 | Myeloperoxidase                                                  | P05164    | MPO       | chr17:58280935  | Inverse variance weighted | 7    | -0.192 | 0.050 | 1.065E-04 | 0.060 | cis     | Severe COVID-19 |
| 4125_52   | sRAGE                           | Advanced glycosylation end product-specific receptor, soluble    | Q15109    | AGER      | chr6:32184321   | Inverse variance weighted | 2    | 0.227  | 0.068 | 8.277E-04 | 0.287 | cis     | Severe COVID-19 |
| 15607_56  | KPYR                            | Pyruvate kinase PKLR                                             | P30613    | PKLR      | chr1:155301438  | Wald ratio                | 1    | -0.421 | 0.126 | 8.557E-04 | 0.287 | cis     | Severe COVID-19 |
| 9253_52   | BGAT                            | Histo-blood group ABO system transferase                         | P16442    | ABO       | chr9:133276024  | Inverse variance weighted | 12   | 0.077  | 0.023 | 1.023E-03 | 0.287 | cis     | Severe COVID-19 |
| 17769_28  | PCNP                            | PEST proteolytic signal-containing nuclear protein               | Q8WW12    | PCNP      | chr3:101574180  | Wald ratio                | 1    | -0.549 | 0.170 | 1.255E-03 | 0.302 | cis     | Severe COVID-19 |
| 12534_10  | CACO2                           | Calcium-binding and coiled-coil domain-containing protein 2      | Q13137    | CALCOCO2  | chr17:48831018  | Wald ratio                | 1    | -0.541 | 0.170 | 1.455E-03 | 0.306 | cis     | Severe COVID-19 |
| 8255_34   | MRV1                            | Protein MRV1                                                     | Q9Y6F6    | IRAG1     | chr11:10693988  | Inverse variance weighted | 2    | -0.380 | 0.124 | 2.121E-03 | 0.311 | cis     | Severe COVID-19 |
| 6404_20   | C1QRF                           | C1q-related factor                                               | Q75973    | C1QL1     | chr17:44968303  | Inverse variance weighted | 3    | -0.193 | 0.063 | 2.138E-03 | 0.311 | cis     | Severe COVID-19 |
| 8923_94   | GLTL1                           | Polypeptide N-acetylgalactosaminyltransferase 16                 | Q8NA28    | GALNT16   | chr14:69259277  | Inverse variance weighted | 4    | -0.231 | 0.075 | 2.151E-03 | 0.311 | cis     | Severe COVID-19 |
| 6955_68   | SNX1                            | Sorting nexin-1                                                  | Q13596    | SNX1      | chr15:64094123  | Wald ratio                | 1    | -0.348 | 0.114 | 2.214E-03 | 0.311 | cis     | Severe COVID-19 |
| 15653_9   | COAA1                           | Collagen alpha-1(X) chain                                        | Q03692    | COL10A1   | chr6:116158747  | Inverse variance weighted | 3    | -0.221 | 0.073 | 2.492E-03 | 0.320 | cis     | Severe COVID-19 |
| 8427_118  | RSP03                           | R-spondin-3                                                      | Q9BXV4    | RSP03     | chr6:127118671  | Inverse variance weighted | 4    | -0.544 | 0.181 | 2.655E-03 | 0.320 | cis     | Severe COVID-19 |
| 12387_7   | PDLI4                           | PDZ and LIM domain protein 4                                     | P50479    | PDLM4     | chr5:132257696  | Wald ratio                | 1    | -0.280 | 0.094 | 2.861E-03 | 0.321 | cis     | Severe COVID-19 |
| 9834_62   | ADH1B                           | Alcohol dehydrogenase 1B                                         | P00325    | ADH1B     | chr4:99352760   | Wald ratio                | 1    | 0.395  | 0.135 | 3.365E-03 | 0.354 | cis     | Severe COVID-19 |
| 19446_1   | GMPPR2                          | GMP reductase 2                                                  | Q9P2T1    | GMPPR2    | chr14:24232422  | Inverse variance weighted | 2    | 0.195  | 0.069 | 4.549E-03 | 0.439 | cis     | Severe COVID-19 |
| 10440_26  | ACAM:ECD                        | CXADR-like membrane protein:Extracellular domain                 | Q9H6B4    | CLMP      | chr11:123195248 | Inverse variance weighted | 3    | 0.201  | 0.071 | 4.689E-03 | 0.439 | cis     | Severe COVID-19 |
| 3852_19   | HSP 40                          | DnaJ homolog subfamily 8 member 1                                | P25685    | DNAJB1    | chr19:14560391  | Wald ratio                | 1    | 1.175  | 0.421 | 5.236E-03 | 0.454 | cis     | Severe COVID-19 |
| 8464_31   | RSP04                           | R-spondin-4                                                      | Q2I0M5    | RSP04     | chr20:1002311   | Inverse variance weighted | 2    | 0.416  | 0.150 | 5.445E-03 | 0.454 | cis     | Severe COVID-19 |
| 13434_172 | PARVA                           | Alpha-parvin                                                     | Q9NV07    | PARVA     | chr11:12377563  | Wald ratio                | 1    | -0.475 | 0.172 | 5.659E-03 | 0.454 | cis     | Severe COVID-19 |
| 9380_2    | sPLA(2)-XIII                    | Group XIIb secretory phospholipase A2-like protein               | Q9BX93    | PLA2G12B  | chr10:72954806  | Wald ratio                | 1    | -0.477 | 0.176 | 6.721E-03 | 0.515 | cis     | Severe COVID-19 |
| 3866_7    | SBD5                            | Ribosome maturation protein SBD5                                 | Q9Y3A5    | SBD5      | chr7:66995693   | Wald ratio                | 1    | 0.318  | 0.119 | 7.396E-03 | 0.517 | cis     | Severe COVID-19 |
| 2567_5    | Factor 1                        | Complement factor 1                                              | P05156    | CFI       | chr4:109802150  | Inverse variance weighted | 2    | 0.217  | 0.081 | 7.635E-03 | 0.517 | cis     | Severe COVID-19 |
| 6930_95   | SIARF                           | Alpha-2,8-sialyltransferase 8F                                   | P61647    | ST8SIA    | chr10:17454595  | Wald ratio                | 1    | -0.808 | 0.303 | 7.670E-03 | 0.517 | cis     | Severe COVID-19 |
| 12494_99  | GBRL2                           | Gamma-aminobutyric acid receptor-associated protein-like 2       | P60520    | GABARAPL2 | chr16:75566375  | Wald ratio                | 1    | -0.517 | 0.196 | 8.239E-03 | 0.534 | cis     | Severe COVID-19 |
| 13943_38  | DPY30                           | Protein dpy-30 homolog                                           | Q9C005    | DPY30     | chr2:32039805   | Wald ratio                | 1    | -0.578 | 0.221 | 9.066E-03 | 0.554 | cis     | Severe COVID-19 |
| 10722_13  | KSYK:Protein Kinase             | Tyrosine-protein kinase SYK:Protein kinase domain                | P43405    | SYK       | chr9:90801787   | Wald ratio                | 1    | 0.751  | 0.288 | 9.213E-03 | 0.554 | cis     | Severe COVID-19 |
| 15339_32  | COF2                            | Cofilin-2                                                        | Q9Y281    | CFL2      | chr14:34714823  | Wald ratio                | 1    | 0.328  | 0.127 | 1.013E-02 | 0.575 | cis     | Severe COVID-19 |
| 8768_4    | Bcl-10                          | B-cell lymphoma/leukemia 10                                      | Q95999    | BCLL10    | chr1:85276632   | Wald ratio                | 1    | 1.040  | 0.406 | 1.042E-02 | 0.575 | cis     | Severe COVID-19 |
| 9359_9    | EGFL9                           | Protein delta homolog 2                                          | Q6UY11    | DLK2      | chr6:43456632   | Wald ratio                | 1    | -0.224 | 0.087 | 1.058E-02 | 0.575 | cis     | Severe COVID-19 |
| 8100_15   | ADM2                            | ADM2                                                             | Q724H4    | ADM2      | chr22:50481543  | Wald ratio                | 1    | 0.981  | 0.389 | 1.177E-02 | 0.588 | cis     | Severe COVID-19 |
| 14636_25  | Ribonuclease UK114              | Ribonuclease UK114                                               | P52758    | RIDA      | chr8:98117171   | Inverse variance weighted | 3    | -0.138 | 0.055 | 1.194E-02 | 0.588 | cis     | Severe COVID-19 |
| 5128_53   | SLAF6                           | SLAM family member 6                                             | Q96DQ3    | SLAMF6    | chr1:160523262  | Wald ratio                | 1    | -0.213 | 0.085 | 1.202E-02 | 0.588 | cis     | Severe COVID-19 |
| 4541_49   | CDON                            | Cell adhesion molecule-related/down-regulated by oncogenes       | Q4KMGO    | CDON      | chr11:126063335 | Inverse variance weighted | 4    | 0.116  | 0.046 | 1.250E-02 | 0.588 | cis     | Severe COVID-19 |
| 8759_29   | a1,4-Galactosyltransferase      | Lactosylceramide 4-alpha-galactosyltransferase                   | Q9NPF4    | A4GALT    | chr22:42721298  | Inverse variance weighted | 4    | 0.107  | 0.043 | 1.270E-02 | 0.588 | cis     | Severe COVID-19 |
| 4188_1    | Aflatoxin B1 aldehyde reductase | Aflatoxin B1 aldehyde reductase member 2                         | O43488    | AKR7A2    | chr1:19312144   | Wald ratio                | 1    | 0.246  | 0.099 | 1.316E-02 | 0.588 | cis     | Severe COVID-19 |
| 19617_5   | LTB4DH                          | Prostaglandin reductase 1                                        | Q14914    | PTGR1     | chr9:111599893  | Inverse variance weighted | 8    | -0.070 | 0.028 | 1.367E-02 | 0.588 | cis     | Severe COVID-19 |
| 3396_54   | Renin                           | Renin                                                            | P00797    | REN       | chr1:204190324  | Inverse variance weighted | 3    | -0.279 | 0.113 | 1.384E-02 | 0.588 | cis     | Severe COVID-19 |
| 13381_49  | B4GT1                           | Beta-1,4-galactosyltransferase 1                                 | P15291    | B4GALT1   | chr9:33167356   | Inverse variance weighted | 2    | -0.190 | 0.078 | 1.442E-02 | 0.588 | cis     | Severe COVID-19 |
| 18435_40  | UBX2B                           | UBX domain-containing protein 2B                                 | Q14CS0    | UBXN2B    | chr8:58411359   | Wald ratio                | 1    | -0.610 | 0.251 | 1.501E-02 | 0.588 | cis     | Severe COVID-19 |
| 2731_29   | NADPH-P450 Oxidoreductase       | NADPH--cytochrome P450 reductase                                 | P16435    | POR       | chr7:7589200    | Inverse variance weighted | 2    | -0.306 | 0.126 | 1.530E-02 | 0.588 | cis     | Severe COVID-19 |
| 5900_11   | HINT1                           | Histidine triad nucleotide-binding protein 1                     | P49773    | HINT1     | chr5:131224468  | Wald ratio                | 1    | 0.436  | 0.180 | 1.531E-02 | 0.588 | cis     | Severe COVID-19 |
| 16918_198 | TLR3                            | Toll-like receptor 3                                             | Q15455    | TLR3      | chr4:186068911  | Inverse variance weighted | 8    | 0.093  | 0.039 | 1.604E-02 | 0.588 | cis     | Severe COVID-19 |
| 19279_42  | CRBP                            | Retinol-binding protein 1                                        | P09455    | RBP1      | chr3:139539829  | Wald ratio                | 1    | 0.554  | 0.232 | 1.682E-02 | 0.588 | cis     | Severe COVID-19 |
| 2658_27   | TrkC                            | NT-3 growth factor receptor                                      | Q16288    | NTRK3     | chr15:88256791  | Inverse variance weighted | 5    | -0.153 | 0.064 | 1.688E-02 | 0.588 | cis     | Severe COVID-19 |
| 19383_131 | CINP                            | Cyclin-dependent kinase 2-interacting protein                    | Q9BW66    | CINP      | chr14:102362916 | Wald ratio                | 1    | 0.666  | 0.279 | 1.707E-02 | 0.588 | cis     | Severe COVID-19 |
| 18381_16  | ALDH-E2                         | Aldehyde dehydrogenase, mitochondrial                            | P05091    | ALDH2     | chr12:111766887 | Wald ratio                | 1    | -0.461 | 0.195 | 1.779E-02 | 0.588 | cis     | Severe COVID-19 |
| 4249_64   | NDP kinase B                    | Nucleoside diphosphate kinase B                                  | P22392    | NME2      | chr17:51165435  | Wald ratio                | 1    | 0.315  | 0.133 | 1.783E-02 | 0.588 | cis     | Severe COVID-19 |
| 8786_6    | F171B:ECD                       | Protein FAM171B:Extracellular domain                             | Q6P995    | FAM171B   | chr2:186694060  | Wald ratio                | 1    | 0.231  | 0.097 | 1.786E-02 | 0.588 | cis     | Severe COVID-19 |
| 6227_1    | kallikrein 10                   | Kallikrein-10                                                    | Q43240    | KLK10     | chr19:51020175  | Inverse variance weighted | 6    | 0.153  | 0.065 | 1.801E-02 | 0.588 | cis     | Severe COVID-19 |
| 4192_10   | AK1A1                           | Alcohol dehydrogenase [NADP(+)]                                  | P14550    | AKR1A1    | chr1:45550543   | Inverse variance weighted | 6    | 0.101  | 0.043 | 1.851E-02 | 0.588 | cis     | Severe COVID-19 |
| 3059_50   | BAFF                            | Tumor necrosis factor ligand superfamily member 13B              | Q9Y275    | TNFSF13B  | chr13:108251240 | Inverse variance weighted | 3    | -0.388 | 0.165 | 1.884E-02 | 0.588 | cis     | Severe COVID-19 |
| 6388_21   | CC126                           | Coiled-coil domain-containing protein 126                        | Q96E44    | CCDC126   | chr7:23597382   | Inverse variance weighted | 4    | 0.119  | 0.051 | 1.891E-02 | 0.588 | cis     | Severe COVID-19 |
| 8288_27   | b2-Glycoprotein I               | Beta-2-glycoprotein 1                                            | Q02749    | APOH      | chr17:66256525  | Inverse variance weighted | 3    | 0.060  | 0.026 | 1.920E-02 | 0.588 | cis     | Severe COVID-19 |
| 4342_10   | siCAM-1                         | Intercellular adhesion molecule 1                                | P05362    | ICAM1     | chr19:10271093  | Inverse variance weighted | 9    | 0.065  | 0.028 | 2.009E-02 | 0.604 | cis     | Severe COVID-19 |
| 15583_18  | FCRLB                           | Fc receptor-like B                                               | Q6BAA4    | FCRLB     | chr1:161712544  | Inverse variance weighted | 5    | 0.245  | 0.107 | 2.190E-02 | 0.646 | cis     | Severe COVID-19 |
| 6927_7    | NDST1                           | Bifunctional heparan sulfate N-deacetylase/N-sulfotransferase 1  | P52848    | NDST1     | chr5:150485818  | Wald ratio                | 1    | 0.244  | 0.107 | 2.223E-02 | 0.646 | cis     | Severe COVID-19 |
| 16792_4   | Siglec-5                        | Sialic acid-binding Ig-like lectin 5                             | Q15389    | SIGLEC5   | chr19:51630401  | Inverse variance weighted | 5    | 0.100  | 0.044 | 2.289E-02 | 0.651 | cis     | Severe COVID-19 |
| 16892_23  | ENPP2                           | Ectonucleotide pyrophosphatase/phosphodiesterase family member 2 | Q13822    | ENPP2     | chr8:119673453  | Inverse variance weighted | 4    | 0.272  | 0.120 | 2.328E-02 | 0.651 | cis     | Severe COVID-19 |
| 3378_49   | Kallikrein 7                    | Kallikrein-7                                                     | P49862    | KLK7      | chr19:50984099  | Inverse variance weighted | 2    | -0.238 | 0.105 | 2.358E-02 | 0.651 | cis     | Severe COVID-19 |
| 12395_86  | SYDM                            | Aspartate--tRNA ligase, mitochondrial                            | Q6PI48    | DARS2     | chr1:173824653  | Wald ratio                | 1    | -0.349 | 0.155 | 2.445E-02 | 0.665 | cis     | Severe COVID-19 |
| 5722_78   | Prolylcarboxypeptidase          | Lysosomal Pro-X carboxypeptidase                                 | P42785    | PRCP      | chr11:82970584  | Inverse variance weighted | 3    | 0.233  | 0.104 | 2.494E-02 | 0.667 | cis     | Severe COVID-19 |
| 3421_54   | CD30 Ligand                     | Tumor necrosis factor ligand superfamily member 8                | P32971    | TNFSF8    | chr9:114930595  | Inverse variance weighted | 2    | -0.218 | 0.097 | 2.543E-02 | 0.669 | cis     | Severe COVID-19 |
| 8356_88   | NEU1                            | Oxytocin-neurophysin 1                                           | P01178    | OXT       | chr20:3071620   | Inverse variance weighted | 3    | 0.158  | 0.071 | 2.643E-02 | 0.683 | cis     | Severe COVID-19 |
| 12428_2   | LYPL1                           | Lysophospholipase-like protein 1                                 | Q5VW22    | LYPLA1    | chr1:219173869  | Wald ratio                | 1    | 0.325  | 0.147 | 2.676E-02 | 0.683 | cis     | Severe COVID-19 |
| 7161_25   | G6PE                            | GDH/6PGL endoplasmic bifunctional protein                        | Q95479    | H6PD      | chr1:9234774    | Inverse variance weighted | 9    | -0.091 | 0.042 | 2.843E-02 | 0.688 | cis     | Severe COVID-19 |
| 2637_77   | Macrophage mannose receptor     | Macrophage mannose receptor 1                                    | P22897    | MRC1      | chr10:17809348  | Inverse variance weighted | 8    | 0.091  | 0.042 | 2.873E-02 | 0.688 | cis     | Severe COVID-19 |
| 6461_54   | Apo C-III                       | Apolipoprotein C-III                                             | Q02656    | APOC3     | chr11:116829706 | Inverse variance weighted | 2    | -0.487 | 0.224 | 2.948E-02 | 0.688 | cis     | Severe COVID-19 |
| 9962_1    | MUCDL                           | Cadherin-related family member 5                                 | Q9H888    | CDHR5     | chr11:626078    | Wald ratio                | 1    | -0.579 | 0.266 | 2.949E-02 | 0.688 | cis     | Severe COVID-19 |
| 12424_107 | THYN1                           | Thymocyte nuclear protein 1                                      | Q9P016    | THYN1     | chr11:134253370 | Wald ratio                | 1    | 0.653  | 0.301 | 2.987E-02 | 0.688 | cis     | Severe COVID-19 |
| 2864_2    | MEK1                            | Dual specificity mitogen-activated protein kinase kinase 1       | Q02750    | MAP2K1    | chr15:66386837  | Wald ratio                | 1    | 0.672  | 0.310 | 3.007E-02 | 0.688 | cis     | Severe COVID-19 |
| 3009_3    | TGF-b R III                     | Transforming growth factor beta receptor type 3                  | Q03167    | TGFB3     | chr1:9190635    | Inverse variance weighted | 2    | -0.310 | 0.143 | 3.051E-02 | 0.688 | cis     | Severe COVID-19 |
| 14708_59  | CO8G                            | Complement component C8 gamma chain                              | P07360    | C8G       | chr9:136945185  | Inverse variance weighted | 5    | 0.183  | 0.085 | 3.136E-02 | 0.688 | cis     | Severe COVID-19 |
| 16621_77  | AIBP                            | NAD(P)H-hydrate epimerase                                        | Q8NCW5    | NAXE      | chr1:156591756  | Wald ratio                | 1    | 0.146  | 0.068 | 3.265E-02 | 0.688 | cis     | Severe COVID-19 |
| 7923_41   | SEM4C                           | Semaphorin-4C                                                    | Q9C0C4    | SEMA4C    | chr2:96870757   | Wald ratio                | 1    | 0.260  | 0.123 | 3.414E-02 | 0.688 | cis     | Severe COVID-19 |

|           |                             |                                                                                                                                    |        |          |                 |                           |    |        |       |           |       |     |                 |
|-----------|-----------------------------|------------------------------------------------------------------------------------------------------------------------------------|--------|----------|-----------------|---------------------------|----|--------|-------|-----------|-------|-----|-----------------|
| 16596_25  | GLRX3                       | Glutaredoxin-3                                                                                                                     | O76003 | GLRX3    | chr10:130136391 | Wald ratio                | 1  | -0.388 | 0.184 | 3.516E-02 | 0.688 | cis | Severe COVID-19 |
| 16605_2   | C179A                       | Complement C1q and tumor necrosis factor-related protein 9A                                                                        | PC0862 | C1QTNF9  | chr13:24307166  | Wald ratio                | 1  | 0.209  | 0.099 | 3.560E-02 | 0.688 | cis | Severe COVID-19 |
| 11547_84  | MUSK                        | Muscle, skeletal receptor tyrosine-protein kinase                                                                                  | O15146 | MUSK     | chr9:110668779  | Wald ratio                | 1  | 0.648  | 0.309 | 3.621E-02 | 0.688 | cis | Severe COVID-19 |
| 6207_10   | prosaposin                  | Prosaposin                                                                                                                         | P07602 | PSAP     | chr10:71851251  | Inverse variance weighted | 3  | 0.099  | 0.048 | 3.703E-02 | 0.688 | cis | Severe COVID-19 |
| 9484_75   | Desmoglein-2                | Desmoglein-2                                                                                                                       | Q14126 | DSG2     | chr18:31498177  | Inverse variance weighted | 5  | 0.219  | 0.105 | 3.726E-02 | 0.688 | cis | Severe COVID-19 |
| 15491_20  | CD248                       | Endosialin                                                                                                                         | Q9HCU0 | CD248    | chr11:66317044  | Inverse variance weighted | 2  | 0.741  | 0.356 | 3.731E-02 | 0.688 | cis | Severe COVID-19 |
| 13438_115 | CHRD                        | Chordin                                                                                                                            | Q9H2X0 | CHRD     | chr3:184380054  | Wald ratio                | 1  | -0.429 | 0.206 | 3.746E-02 | 0.688 | cis | Severe COVID-19 |
| 15603_20  | Integrin alpha-2            | Integrin alpha-2                                                                                                                   | P17301 | ITGA2    | chr5:52989340   | Wald ratio                | 1  | 0.341  | 0.164 | 3.757E-02 | 0.688 | cis | Severe COVID-19 |
| 12432_23  | CYBP                        | Calcylin-binding protein                                                                                                           | Q9HB71 | CACYBP   | chr1:174999163  | Wald ratio                | 1  | -0.228 | 0.110 | 3.774E-02 | 0.688 | cis | Severe COVID-19 |
| 13973_62  | TTL                         | Tubulin-tyrosine ligase                                                                                                            | Q8NG68 | TTL      | chr2:112482156  | Wald ratio                | 1  | 0.554  | 0.267 | 3.782E-02 | 0.688 | cis | Severe COVID-19 |
| 2972_57   | BMP-7                       | Bone morphogenetic protein 7                                                                                                       | P18075 | BMP7     | chr20:57266641  | Wald ratio                | 1  | 0.534  | 0.257 | 3.806E-02 | 0.688 | cis | Severe COVID-19 |
| 11102_22  | REG4                        | Regenerating islet-derived protein 4                                                                                               | Q9BY28 | REG4     | chr1:119811580  | Inverse variance weighted | 5  | -0.204 | 0.099 | 3.881E-02 | 0.688 | cis | Severe COVID-19 |
| 13666_222 | Carbonic Anhydrase X        | Carbonic anhydrase-related protein 10                                                                                              | Q9NS85 | CA10     | chr17:52160017  | Inverse variance weighted | 4  | -0.117 | 0.057 | 4.050E-02 | 0.688 | cis | Severe COVID-19 |
| 16049_43  | OLR1                        | Oxidized low-density lipoprotein receptor 1                                                                                        | P78380 | OLR1     | chr12:10172138  | Wald ratio                | 1  | 0.524  | 0.256 | 4.091E-02 | 0.688 | cis | Severe COVID-19 |
| 2631_50   | IL-10 Rb                    | Interleukin-10 receptor subunit beta                                                                                               | Q08334 | IL10RB   | chr21:33266367  | Wald ratio                | 1  | 0.602  | 0.295 | 4.108E-02 | 0.688 | cis | Severe COVID-19 |
| 6925_26   | SNX8                        | Sorting nexin-8                                                                                                                    | Q9Y5X2 | SNX8     | chr7:2354318    | Inverse variance weighted | 2  | 0.182  | 0.089 | 4.147E-02 | 0.688 | cis | Severe COVID-19 |
| 11568_2   | FKBP18                      | Peptidyl-prolyl cis-trans isomerase FKBP18                                                                                         | P68106 | FKBP18   | chr2:24049701   | Wald ratio                | 1  | 0.273  | 0.134 | 4.163E-02 | 0.688 | cis | Severe COVID-19 |
| 8297_8    | DIC10                       | Dnal homolog subfamily C member 10                                                                                                 | Q8X181 | DNAIC10  | chr2:182716255  | Inverse variance weighted | 2  | -0.298 | 0.146 | 4.169E-02 | 0.688 | cis | Severe COVID-19 |
| 8989_40   | SCUB1                       | Signal peptide, CUB and EGF-like domain-containing protein 1                                                                       | Q8WIW4 | SCUB1E   | chr22:43343372  | Inverse variance weighted | 4  | -0.295 | 0.145 | 4.176E-02 | 0.688 | cis | Severe COVID-19 |
| 2741_22   | Siglec-6                    | Sialic acid-binding Ig-like lectin 6                                                                                               | O43699 | SIGLEC6  | chr19:51531856  | Inverse variance weighted | 6  | -0.110 | 0.054 | 4.201E-02 | 0.688 | cis | Severe COVID-19 |
| 12558_3   | UBS3B                       | Ubiquitin-associated and SH3 domain-containing protein B                                                                           | Q8TF42 | UBASH3B  | chr11:122655722 | Inverse variance weighted | 2  | -0.224 | 0.111 | 4.305E-02 | 0.688 | cis | Severe COVID-19 |
| 11387_3   | ATF6B                       | Cyclic AMP-dependent transcription factor ATF-6 beta                                                                               | Q99941 | ATF6B    | chr6:32128253   | Inverse variance weighted | 3  | -0.275 | 0.136 | 4.324E-02 | 0.688 | cis | Severe COVID-19 |
| 15582_25  | FCN1                        | Ficolin-1                                                                                                                          | O00602 | FCN1     | chr9:134917912  | Inverse variance weighted | 5  | 0.106  | 0.053 | 4.332E-02 | 0.688 | cis | Severe COVID-19 |
| 3316_58   | Heparin cofactor II         | Heparin cofactor 2                                                                                                                 | P05546 | SERPIND1 | chr22:20774113  | Wald ratio                | 1  | 0.598  | 0.296 | 4.360E-02 | 0.688 | cis | Severe COVID-19 |
| 9263_57   | SIAE                        | Sialate O-acetyltransferase                                                                                                        | Q9HAT2 | SIAE     | chr11:124695707 | Wald ratio                | 1  | 0.335  | 0.166 | 4.406E-02 | 0.688 | cis | Severe COVID-19 |
| 13590_1   | ORN                         | Oligoribonuclease, mitochondrial                                                                                                   | Q9Y388 | REXO2    | chr11:114439435 | Wald ratio                | 1  | -0.257 | 0.128 | 4.412E-02 | 0.688 | cis | Severe COVID-19 |
| 2844_53   | sTie-1                      | Tyrosine-protein kinase receptor Tie-1, soluble                                                                                    | P35590 | TIE1     | chr1:43300982   | Inverse variance weighted | 4  | 0.133  | 0.066 | 4.445E-02 | 0.688 | cis | Severe COVID-19 |
| 3325_2    | MATN2                       | Matrilin-2                                                                                                                         | O00339 | MATN2    | chr8:97868840   | Inverse variance weighted | 4  | 0.222  | 0.111 | 4.480E-02 | 0.688 | cis | Severe COVID-19 |
| 5744_12   | CA056                       | Protein MENT                                                                                                                       | Q9BU11 | MENT     | chr1:151047751  | Inverse variance weighted | 2  | -0.396 | 0.198 | 4.500E-02 | 0.688 | cis | Severe COVID-19 |
| 17739_1   | HCDH                        | Hydroxyacyl-coenzyme A dehydrogenase, mitochondrial                                                                                | Q16836 | HADH     | chr4:107989714  | Wald ratio                | 1  | -0.432 | 0.216 | 4.525E-02 | 0.688 | cis | Severe COVID-19 |
| 17808_37  | NIT2                        | Omega-amidase NIT2                                                                                                                 | Q9NQR4 | NIT2     | chr3:100334739  | Inverse variance weighted | 2  | 0.256  | 0.128 | 4.549E-02 | 0.688 | cis | Severe COVID-19 |
| 13940_19  | IP16:HN1                    | Gamma-interferon-inducible protein 16:isoform 2, Hematopoietic expression, interferon-inducible nature, and nuclear localization 1 | Q16666 | IFI16    | chr1:158999968  | Wald ratio                | 1  | 0.454  | 0.229 | 4.754E-02 | 0.688 | cis | Severe COVID-19 |
| 13102_1   | FAM3D                       | Protein FAM3D                                                                                                                      | Q96BQ1 | FAM3D    | chr3:58666834   | Inverse variance weighted | 4  | -0.095 | 0.048 | 4.795E-02 | 0.688 | cis | Severe COVID-19 |
| 9754_33   | Quinone reductase 2         | Ribosylidihydroxynicotinamide dehydrogenase [quinone]                                                                              | P16083 | NQO2     | chr6:2987987    | Inverse variance weighted | 8  | 0.052  | 0.026 | 4.812E-02 | 0.688 | cis | Severe COVID-19 |
| 4500_50   | SCGF-alpha                  | Stem cell growth factor-alpha                                                                                                      | Q9Y240 | CLEC11A  | chr19:50723364  | Inverse variance weighted | 2  | -0.078 | 0.040 | 4.849E-02 | 0.688 | cis | Severe COVID-19 |
| 8337_65   | PTPRU                       | Receptor-type tyrosine-protein phosphatase U                                                                                       | Q92729 | PTPRU    | chr1:29236516   | Inverse variance weighted | 5  | -0.197 | 0.100 | 4.870E-02 | 0.688 | cis | Severe COVID-19 |
| 17836_17  | S100A16                     | Protein S100-A16                                                                                                                   | Q96FG6 | S100A16  | chr1:153613145  | Wald ratio                | 1  | -0.515 | 0.262 | 4.900E-02 | 0.688 | cis | Severe COVID-19 |
| 15385_116 | FABP2                       | Fatty acid-binding protein, intestinal                                                                                             | P12104 | FABP2    | chr4:119322138  | Inverse variance weighted | 5  | 0.089  | 0.045 | 4.933E-02 | 0.688 | cis | Severe COVID-19 |
| 19233_75  | ATOX1                       | Copper transport protein ATOX1                                                                                                     | O00244 | ATOX1    | chr5:151772532  | Wald ratio                | 1  | 0.558  | 0.284 | 4.942E-02 | 0.688 | cis | Severe COVID-19 |
| 8053_16   | DJB14:CD                    | Dnal homolog subfamily B member 14:Cytoplasmic domain                                                                              | Q8TBM6 | DNAIB14  | chr4:99946618   | Wald ratio                | 1  | 0.491  | 0.250 | 4.958E-02 | 0.688 | cis | Severe COVID-19 |
| 18839_24  | Thyroglobulin               | Thyroglobulin                                                                                                                      | P01266 | TG       | chr8:132866958  | Wald ratio                | 1  | -0.361 | 0.185 | 5.107E-02 | 0.688 | cis | Severe COVID-19 |
| 12469_19  | MARE1                       | Microtubule-associated protein RP/EB family member 1                                                                               | Q15691 | MAPRE1   | chr20:32819954  | Wald ratio                | 1  | -0.552 | 0.283 | 5.114E-02 | 0.688 | cis | Severe COVID-19 |
| 3431_54   | EphA1                       | Ephrin type-A receptor 1                                                                                                           | P21709 | EPHA1    | chr7:143408856  | Inverse variance weighted | 7  | -0.076 | 0.039 | 5.196E-02 | 0.688 | cis | Severe COVID-19 |
| 3710_49   | Angiostatin                 | Angiostatin                                                                                                                        | P00747 | PLG      | chr6:160702194  | Inverse variance weighted | 7  | 0.206  | 0.106 | 5.208E-02 | 0.688 | cis | Severe COVID-19 |
| 19347_37  | Carbonic Anhydrase XII      | Carbonic anhydrase 12                                                                                                              | O43570 | CA12     | chr5:63381846   | Wald ratio                | 1  | -0.809 | 0.417 | 5.220E-02 | 0.688 | cis | Severe COVID-19 |
| 18916_25  | Inosine triphosphatase      | Inosine triphosphate pyrophosphatase                                                                                               | Q9BY32 | ITPA     | chr20:3208868   | Inverse variance weighted | 8  | -0.068 | 0.035 | 5.245E-02 | 0.688 | cis | Severe COVID-19 |
| 18884_22  | DNJB4                       | Dnal homolog subfamily B member 4                                                                                                  | Q9UDY4 | DNAJB4   | chr1:77979175   | Inverse variance weighted | 3  | 0.173  | 0.089 | 5.269E-02 | 0.688 | cis | Severe COVID-19 |
| 4234_8    | IL-1 R4                     | Interleukin-1 receptor-like 1                                                                                                      | Q01638 | IL1RL1   | chr2:102311502  | Inverse variance weighted | 8  | -0.068 | 0.035 | 5.283E-02 | 0.688 | cis | Severe COVID-19 |
| 12697_30  | PI42A                       | Phosphatidylinositol 5-phosphate 4-kinase type-2 alpha                                                                             | P48426 | PIP4K2A  | chr10:22714578  | Wald ratio                | 1  | 0.337  | 0.174 | 5.291E-02 | 0.688 | cis | Severe COVID-19 |
| 10037_98  | SIG12-Ig-like V-type 2      | Sialic acid-binding Ig-like lectin 12-Ig-like V-type 2 domain, Isoform long                                                        | Q96PQ1 | SIGLEC12 | chr19:51501800  | Inverse variance weighted | 4  | -0.130 | 0.067 | 5.312E-02 | 0.688 | cis | Severe COVID-19 |
| 10554_23  | BGAL                        | Beta-galactosidase                                                                                                                 | P16278 | GLB1     | chr3:33097202   | Wald ratio                | 1  | 0.873  | 0.452 | 5.358E-02 | 0.688 | cis | Severe COVID-19 |
| 3206_4    | LYVE1                       | Lymphatic vessel endothelial hyaluronidic acid receptor 1                                                                          | Q9Y5Y7 | LYVE1    | chr11:10611689  | Inverse variance weighted | 6  | 0.144  | 0.075 | 5.396E-02 | 0.688 | cis | Severe COVID-19 |
| 9950_229  | LAG-3                       | Lymphocyte activation gene 3 protein                                                                                               | P18627 | LAG3     | chr12:6772512   | Inverse variance weighted | 2  | -0.237 | 0.123 | 5.406E-02 | 0.688 | cis | Severe COVID-19 |
| 2973_15   | CD36 ANTIGEN                | Platelet glycoprotein 4                                                                                                            | P16671 | CD36     | chr7:80369575   | Inverse variance weighted | 4  | 0.141  | 0.074 | 5.475E-02 | 0.688 | cis | Severe COVID-19 |
| 16558_2   | MYOC                        | Myocilin                                                                                                                           | Q99972 | MYOC     | chr1:171652688  | Inverse variance weighted | 8  | 0.081  | 0.042 | 5.491E-02 | 0.688 | cis | Severe COVID-19 |
| 6402_8    | PILRA isoform FDF03-deltaTM | Paired immunoglobulin-like type 2 receptor alpha isoform FDF03-deltaTM                                                             | Q9UKJ1 | PILRA    | chr7:100367530  | Inverse variance weighted | 2  | 0.095  | 0.049 | 5.500E-02 | 0.688 | cis | Severe COVID-19 |
| 5006_71   | MK13                        | Mitogen-activated protein kinase 13                                                                                                | O15264 | MAPK13   | chr6:36127809   | Wald ratio                | 1  | -0.389 | 0.203 | 5.529E-02 | 0.688 | cis | Severe COVID-19 |
| 15596_7   | HEX1I                       | Protein HEX1I                                                                                                                      | O94992 | HEX1I    | chr17:45148475  | Wald ratio                | 1  | 0.552  | 0.288 | 5.539E-02 | 0.688 | cis | Severe COVID-19 |
| 9213_24   | FTCD                        | Formimidoyltransferase-cyclodeaminase                                                                                              | O95954 | FTCD     | chr21:46155579  | Inverse variance weighted | 3  | -0.193 | 0.101 | 5.573E-02 | 0.688 | cis | Severe COVID-19 |
| 18933_4   | TGM4                        | Protein-glutamine gamma-glutamyltransferase 4                                                                                      | P49221 | TGM4     | chr3:44874608   | Wald ratio                | 1  | -0.523 | 0.274 | 5.591E-02 | 0.688 | cis | Severe COVID-19 |
| 10977_55  | UCMA                        | Unique cartilage matrix-associated protein                                                                                         | Q8WWF2 | UCMA     | chr10:13234374  | Inverse variance weighted | 5  | 0.095  | 0.050 | 5.683E-02 | 0.688 | cis | Severe COVID-19 |
| 6493_9    | CBPZ                        | Carboxypeptidase Z                                                                                                                 | Q66K79 | CPZ      | chr4:8592660    | Inverse variance weighted | 2  | 0.329  | 0.173 | 5.705E-02 | 0.688 | cis | Severe COVID-19 |
| 8269_327  | ARSK                        | Arylsulfatase K                                                                                                                    | Q6UWY0 | ARSK     | chr5:95555101   | Wald ratio                | 1  | 0.432  | 0.227 | 5.710E-02 | 0.688 | cis | Severe COVID-19 |
| 18307_71  | Ppase 2                     | Inorganic pyrophosphatase 2, mitochondrial                                                                                         | Q9H2U2 | PPA2     | chr4:105474067  | Wald ratio                | 1  | 0.442  | 0.233 | 5.716E-02 | 0.688 | cis | Severe COVID-19 |
| 4924_32   | MMP-1                       | Interstitial collagenase                                                                                                           | P03956 | MMP1     | chr11:102798160 | Inverse variance weighted | 9  | 0.085  | 0.045 | 5.822E-02 | 0.696 | cis | Severe COVID-19 |
| 15565_102 | CA125                       | Mucin-16                                                                                                                           | Q8WIX7 | MUC16    | chr19:8981342   | Inverse variance weighted | 2  | -0.202 | 0.107 | 5.973E-02 | 0.708 | cis | Severe COVID-19 |
| 3327_27   | NET4                        | Netrin-4                                                                                                                           | Q9HB63 | NTN4     | chr12:95791189  | Inverse variance weighted | 3  | 0.179  | 0.095 | 6.009E-02 | 0.708 | cis | Severe COVID-19 |
| 17832_12  | IDI2                        | Isopentenyl-diphosphate delta-isomerase 2                                                                                          | Q9BX51 | IDI2     | chr10:1025859   | Inverse variance weighted | 2  | 0.179  | 0.096 | 6.175E-02 | 0.711 | cis | Severe COVID-19 |
| 16828_8   | Collagen a1(VI)             | Collagen alpha-1(VI) chain                                                                                                         | P12109 | COL6A1   | chr21:45981770  | Inverse variance weighted | 10 | -0.047 | 0.025 | 6.231E-02 | 0.711 | cis | Severe COVID-19 |
| 16809_1   | NDKM                        | Nucleoside diphosphate kinase, mitochondrial                                                                                       | O00746 | NME4     | chr16:396725    | Inverse variance weighted | 2  | 0.308  | 0.165 | 6.242E-02 | 0.711 | cis | Severe COVID-19 |
| 14123_34  | GI24:ECD                    | V-type immunoglobulin domain-containing suppressor of T-cell activation:Extracellular domain                                       | Q9H7M9 | VSIR     | chr10:71773520  | Inverse variance weighted | 5  | -0.282 | 0.152 | 6.290E-02 | 0.711 | cis | Severe COVID-19 |
| 17680_12  | EPHB1                       | Ephrin type-B receptor 1                                                                                                           | P54762 | EPHB1    | chr3:134795260  | Inverse variance weighted | 3  | 0.080  | 0.043 | 6.295E-02 | 0.711 | cis | Severe COVID-19 |
| 7806_33   | B4GT7                       | Beta-1,4-galactosyltransferase 7                                                                                                   | Q9UBV7 | B4GALT7  | chr5:177600132  | Inverse variance weighted | 7  | 0.126  | 0.068 | 6.348E-02 | 0.711 | cis | Severe COVID-19 |
| 15560_52  | Apo-TC II                   | Transcobalamin-2                                                                                                                   | P20062 | TCN2     | chr22:30607003  | Inverse variance weighted | 4  | -0.080 | 0.043 | 6.457E-02 | 0.711 | cis | Severe COVID-19 |
| 9719_145  | MMP-16                      | Matrix metalloproteinase-16                                                                                                        | P51512 | MMP16    | chr8:88328025   | Wald ratio                | 1  | -0.611 | 0.331 | 6.468E-02 | 0.711 | cis | Severe COVID-19 |
| 15641_20  | TEFF1                       | Tomoregulin-1                                                                                                                      | Q8IYR6 | TMEFF1   | chr9:100473149  | Wald ratio                | 1  | -0.482 | 0.261 | 6.507E-02 | 0.711 | cis | Severe COVID-19 |
| 4159_130  | Factor H                    | Complement factor H                                                                                                                | P08603 | CFH      | chr1:196651754  | Wald ratio                | 1  | 0.367  | 0.199 | 6.538E-02 | 0.711 | cis | Severe COVID-19 |
| 7891_45   | UGT 1A6                     | UDP-glucuronosyltransferase 1-6                                                                                                    | P19224 | UGT1A6   | chr2:233691607  | Inverse variance weighted | 4  | -0.152 | 0.083 | 6.559E-02 | 0.711 | cis | Severe COVID-19 |

|           |                              |                                                                                            |        |            |                 |                           |    |        |       |           |       |     |                 |
|-----------|------------------------------|--------------------------------------------------------------------------------------------|--------|------------|-----------------|---------------------------|----|--------|-------|-----------|-------|-----|-----------------|
| 3044_3    | PARC                         | C-C motif chemokine 18                                                                     | P55774 | CCL18      | chr17:36064272  | Inverse variance weighted | 3  | 0.255  | 0.139 | 6.696E-02 | 0.711 | cis | Severe COVID-19 |
| 16613_3   | CAD17                        | Cadherin-17                                                                                | Q12864 | CDH17      | chr8:94217303   | Inverse variance weighted | 5  | 0.094  | 0.051 | 6.730E-02 | 0.711 | cis | Severe COVID-19 |
| 4911_49   | Glutathione S-transferase Pi | Glutathione S-transferase P                                                                | P09211 | GSTP1      | chr11:67583742  | Inverse variance weighted | 2  | -0.195 | 0.107 | 6.738E-02 | 0.711 | cis | Severe COVID-19 |
| 8925_25   | RIR2B                        | Ribonucleoside-diphosphate reductase subunit M2 B                                          | Q7LG56 | RRM2B      | chr8:102238961  | Inverse variance weighted | 2  | 0.172  | 0.094 | 6.821E-02 | 0.711 | cis | Severe COVID-19 |
| 17821_20  | NMT2                         | Glycylpeptide N-tetradecanoyltransferase 2                                                 | O60551 | NMT2       | chr10:15168693  | Wald ratio                | 1  | 0.435  | 0.239 | 6.873E-02 | 0.711 | cis | Severe COVID-19 |
| 9981_18   | K1467:C-term                 | Protein FAM2348:C-term                                                                     | A2RU67 | FAM2348    | chr12:13004381  | Inverse variance weighted | 5  | -0.170 | 0.093 | 6.876E-02 | 0.711 | cis | Severe COVID-19 |
| 2992_59   | IL-17 sR                     | Interleukin-17 receptor A                                                                  | Q9GFA6 | IL17RA     | chr22:17084954  | Inverse variance weighted | 7  | -0.033 | 0.018 | 6.923E-02 | 0.711 | cis | Severe COVID-19 |
| 19173_5   | ZFAN1                        | AN1-type zinc finger protein 1                                                             | Q8TFC1 | ZFAND1     | chr8:81732903   | Inverse variance weighted | 3  | 0.177  | 0.098 | 6.984E-02 | 0.711 | cis | Severe COVID-19 |
| 2480_58   | TIMP-3                       | Metalloproteinase inhibitor 3                                                              | P35625 | TIMP3      | chr22:32801705  | Inverse variance weighted | 10 | 0.050  | 0.028 | 6.997E-02 | 0.711 | cis | Severe COVID-19 |
| 5825_49   | IFN-g R1                     | Interferon gamma receptor 1                                                                | P15260 | IFNGR1     | chr6:137219449  | Inverse variance weighted | 3  | -0.408 | 0.226 | 7.021E-02 | 0.711 | cis | Severe COVID-19 |
| 9321_400  | NMB                          | Neuromedin-B                                                                               | P08949 | NMB        | chr15:84658563  | Inverse variance weighted | 2  | -0.171 | 0.095 | 7.044E-02 | 0.711 | cis | Severe COVID-19 |
| 11126_102 | TRIO                         | Triple functional domain protein                                                           | O75962 | TRIO       | chr5:14143342   | Wald ratio                | 1  | -0.601 | 0.333 | 7.121E-02 | 0.711 | cis | Severe COVID-19 |
| 15499_11  | Attractin                    | Attractin                                                                                  | O75882 | ATRIN      | chr20:3471018   | Inverse variance weighted | 5  | -0.107 | 0.059 | 7.125E-02 | 0.711 | cis | Severe COVID-19 |
| 15480_2   | VNN2                         | Vascular non-inflammatory molecule 2                                                       | O95498 | VNN2       | chr6:132763459  | Inverse variance weighted | 11 | 0.044  | 0.025 | 7.175E-02 | 0.711 | cis | Severe COVID-19 |
| 9580_5    | Laminin gamma-2              | Laminin subunit gamma-2                                                                    | Q13753 | LAMC2      | chr1:183186238  | Inverse variance weighted | 4  | -0.105 | 0.058 | 7.239E-02 | 0.711 | cis | Severe COVID-19 |
| 2635_61   | Laylin                       | Laylin                                                                                     | Q6UX15 | LAYN       | chr11:111540280 | Wald ratio                | 1  | -0.485 | 0.270 | 7.240E-02 | 0.711 | cis | Severe COVID-19 |
| 18875_125 | Chondrocalcin                | Chondrocalcin                                                                              | P02458 | COL2A1     | chr12:48004554  | Inverse variance weighted | 7  | -0.077 | 0.043 | 7.242E-02 | 0.711 | cis | Severe COVID-19 |
| 10924_258 | NEUFC                        | Neuferricin                                                                                | Q8WU11 | CYB5D2     | chr17:4143168   | Inverse variance weighted | 3  | 0.186  | 0.103 | 7.253E-02 | 0.711 | cis | Severe COVID-19 |
| 10702_1   | COSA1                        | Collagen alpha-1(XXVIII) chain                                                             | Q2UVO9 | COL28A1    | chr7:7535873    | Wald ratio                | 1  | 0.587  | 0.328 | 7.368E-02 | 0.718 | cis | Severe COVID-19 |
| 7808_5    | GLCE                         | D-glucuronyl C5-epimerase                                                                  | O94923 | GLCE       | chr15:69160584  | Inverse variance weighted | 7  | -0.066 | 0.037 | 7.545E-02 | 0.720 | cis | Severe COVID-19 |
| 9715_15   | IGSF3                        | Immunoglobulin superfamily member 3                                                        | O75054 | IGSF3      | chr1:116667755  | Inverse variance weighted | 3  | 0.310  | 0.174 | 7.549E-02 | 0.720 | cis | Severe COVID-19 |
| 15398_2   | HERV1                        | FAD-linked sulphydryl oxidase ALR                                                          | P55789 | GFER       | chr16:1984193   | Wald ratio                | 1  | -0.473 | 0.267 | 7.602E-02 | 0.720 | cis | Severe COVID-19 |
| 11378_37  | KSYP:SH2, 1 and 2            | Tyrosine-protein kinase SYK:Src Homology domain                                            | P43405 | SYK        | chr9:90801787   | Wald ratio                | 1  | 0.564  | 0.318 | 7.603E-02 | 0.720 | cis | Severe COVID-19 |
| 3376_49   | IL-17 RD                     | Interleukin-17 receptor D                                                                  | Q8NFM7 | IL17RD     | chr3:57170306   | Inverse variance weighted | 4  | 0.072  | 0.040 | 7.626E-02 | 0.720 | cis | Severe COVID-19 |
| 10916_44  | PLA2R                        | Secretory phospholipase A2 receptor                                                        | Q13018 | PLA2R1     | chr2:160062615  | Inverse variance weighted | 6  | 0.057  | 0.032 | 7.644E-02 | 0.720 | cis | Severe COVID-19 |
| 2418_55   | Apo E                        | Apolipoprotein E                                                                           | P02649 | APOE       | chr19:444905791 | Inverse variance weighted | 4  | 0.175  | 0.099 | 7.697E-02 | 0.721 | cis | Severe COVID-19 |
| 6527_1    | TRL:ECD                      | TLR4 interactor with leucine rich repeats:Extracellular domain                             | Q7LQ00 | TRIL       | chr7:28958330   | Wald ratio                | 1  | 0.344  | 0.196 | 7.943E-02 | 0.730 | cis | Severe COVID-19 |
| 3905_62   | UBE2N                        | Ubiquitin-conjugating enzyme E2 N                                                          | P61088 | UBE2N      | chr12:93441947  | Wald ratio                | 1  | -0.579 | 0.330 | 7.954E-02 | 0.730 | cis | Severe COVID-19 |
| 6998_106  | HAAH                         | Aspartyl/asparaginyl beta-hydroxylase                                                      | Q12797 | ASPH       | chr8:61714640   | Inverse variance weighted | 2  | 0.277  | 0.158 | 7.979E-02 | 0.730 | cis | Severe COVID-19 |
| 12431_13  | PELO                         | Protein pelota homolog                                                                     | Q9BRK2 | PELO       | chr5:52787916   | Wald ratio                | 1  | -0.568 | 0.325 | 8.034E-02 | 0.730 | cis | Severe COVID-19 |
| 8402_22   | CYT1L                        | Cytokine-like protein 1                                                                    | Q9NRR1 | CYT1L      | chr4:5019458    | Inverse variance weighted | 3  | -0.127 | 0.072 | 8.039E-02 | 0.730 | cis | Severe COVID-19 |
| 8035_6    | CA198                        | Uncharacterized protein C1orf198                                                           | Q9H425 | C1orf198   | chr1:230869589  | Wald ratio                | 1  | 0.228  | 0.131 | 8.130E-02 | 0.730 | cis | Severe COVID-19 |
| 9173_21   | PGM1                         | Phosphoglucomutase-1                                                                       | P36871 | PGM1       | chr1:63593411   | Inverse variance weighted | 2  | 0.247  | 0.142 | 8.149E-02 | 0.730 | cis | Severe COVID-19 |
| 3470_1    | sE-Selectin                  | E-selectin                                                                                 | P16581 | SELE       | chr1:169764705  | Wald ratio                | 1  | 0.328  | 0.188 | 8.195E-02 | 0.730 | cis | Severe COVID-19 |
| 17682_1   | CD46                         | Membrane cofactor protein                                                                  | P15529 | CD46       | chr1:207752037  | Inverse variance weighted | 2  | 0.141  | 0.081 | 8.201E-02 | 0.730 | cis | Severe COVID-19 |
| 9005_16   | PLXA1                        | Plexin-A1                                                                                  | Q9UW2  | PLXNA1     | chr3:126982693  | Inverse variance weighted | 3  | -0.202 | 0.116 | 8.229E-02 | 0.730 | cis | Severe COVID-19 |
| 8231_122  | VEGF sR1                     | Vascular endothelial growth factor receptor 1                                              | P17948 | FLT1       | chr13:28495145  | Wald ratio                | 1  | 0.501  | 0.291 | 8.474E-02 | 0.745 | cis | Severe COVID-19 |
| 13124_20  | ISLR2                        | Immunoglobulin superfamily containing leucine-rich repeat protein 2                        | Q6UXK2 | ISLR2      | chr15:74100311  | Inverse variance weighted | 4  | -0.178 | 0.104 | 8.488E-02 | 0.745 | cis | Severe COVID-19 |
| 4162_54   | Transferrin                  | Serotransferrin                                                                            | P02787 | TF         | chr3:133746040  | Inverse variance weighted | 2  | 0.168  | 0.098 | 8.708E-02 | 0.760 | cis | Severe COVID-19 |
| 9765_4    | NDE1                         | Nuclear distribution protein nudE homolog 1                                                | Q9NXR1 | NDE1       | chr16:15643267  | Wald ratio                | 1  | 0.365  | 0.214 | 8.769E-02 | 0.762 | cis | Severe COVID-19 |
| 4479_14   | C1-Esterase Inhibitor        | Plasma protease C1 inhibitor                                                               | P05155 | SERPINC1   | chr11:57597387  | Inverse variance weighted | 6  | -0.058 | 0.034 | 8.939E-02 | 0.768 | cis | Severe COVID-19 |
| 10772_21  | CGAT2                        | Chondroitin sulfate N-acetylgalactosaminyltransferase 2                                    | Q8N6G5 | CSGALNACT2 | chr10:43138445  | Wald ratio                | 1  | 0.267  | 0.157 | 8.973E-02 | 0.768 | cis | Severe COVID-19 |
| 18895_54  | GSTM4                        | Glutathione S-transferase Mu 4                                                             | Q03013 | GSTM4      | chr1:109656099  | Inverse variance weighted | 6  | 0.144  | 0.085 | 8.979E-02 | 0.768 | cis | Severe COVID-19 |
| 6605_17   | IGFALS                       | Insulin-like growth factor-binding protein complex acid labile subunit                     | P35858 | IGFALS     | chr16:1794971   | Inverse variance weighted | 3  | -0.164 | 0.097 | 9.059E-02 | 0.768 | cis | Severe COVID-19 |
| 11531_24  | G124:CD                      | V-type immunoglobulin domain-containing suppressor of T-cell activation:Cytoplasmic domain | Q9H7M9 | VSIR       | chr10:71773520  | Wald ratio                | 1  | 0.411  | 0.244 | 9.169E-02 | 0.768 | cis | Severe COVID-19 |
| 17691_1   | TPP1                         | Tripeptidyl-peptidase 1                                                                    | Q14773 | TPP1       | chr11:6619448   | Inverse variance weighted | 5  | -0.144 | 0.086 | 9.282E-02 | 0.768 | cis | Severe COVID-19 |
| 7185_29   | GPV                          | Platelet glycoprotein V                                                                    | P40197 | GP5        | chr3:194399266  | Inverse variance weighted | 2  | -0.290 | 0.173 | 9.343E-02 | 0.768 | cis | Severe COVID-19 |
| 12386_11  | AMPB                         | Aminopeptidase B                                                                           | Q9H4A4 | RNPEP      | chr1:201982372  | Inverse variance weighted | 5  | 0.075  | 0.045 | 9.348E-02 | 0.768 | cis | Severe COVID-19 |
| 17447_52  | SFRP4                        | Secreted frizzled-related protein 4                                                        | Q6FHJ7 | SFRP4      | chr7:38025695   | Inverse variance weighted | 2  | -0.112 | 0.067 | 9.394E-02 | 0.768 | cis | Severe COVID-19 |
| 5810_25   | Cripto                       | Teratocarcinoma-derived growth factor 1                                                    | P13385 | TGDF1      | chr3:46574534   | Inverse variance weighted | 6  | 0.226  | 0.135 | 9.398E-02 | 0.768 | cis | Severe COVID-19 |
| 5078_82   | EphB6                        | Ephrin type-B receptor 6                                                                   | O15197 | EPHB6      | chr7:142855061  | Inverse variance weighted | 3  | 0.155  | 0.093 | 9.424E-02 | 0.768 | cis | Severe COVID-19 |
| 6629_3    | HBD-1                        | Beta-defensin 1                                                                            | P60022 | DEFB1      | chr8:6877936    | Inverse variance weighted | 5  | -0.082 | 0.049 | 9.425E-02 | 0.768 | cis | Severe COVID-19 |
| 8859_51   | CAH11                        | Carbonic anhydrase-related protein 11                                                      | O75493 | CA11       | chr19:48646187  | Wald ratio                | 1  | 0.239  | 0.143 | 9.454E-02 | 0.768 | cis | Severe COVID-19 |
| 12449_16  | PPIH                         | Peptidyl-prolyl cis-trans isomerase H                                                      | O43447 | PPIH       | chr1:42658335   | Inverse variance weighted | 2  | 0.341  | 0.204 | 9.478E-02 | 0.768 | cis | Severe COVID-19 |
| 12016_60  | CBL                          | E3 ubiquitin-protein ligase CBL                                                            | P22681 | CBL        | chr11:119206298 | Wald ratio                | 1  | 0.175  | 0.105 | 9.564E-02 | 0.771 | cis | Severe COVID-19 |
| 4920_10   | Lysozyme                     | Lysozyme C                                                                                 | P61626 | LYZ        | chr12:69348381  | Inverse variance weighted | 6  | -0.062 | 0.037 | 9.715E-02 | 0.777 | cis | Severe COVID-19 |
| 13563_259 | ACBD7                        | Acyl-CoA-binding domain-containing protein 7                                               | Q8N6N7 | ACBD7      | chr10:15088776  | Wald ratio                | 1  | 0.648  | 0.392 | 9.772E-02 | 0.777 | cis | Severe COVID-19 |
| 3352_80   | Carbonic anhydrase 6         | Carbonic anhydrase 6                                                                       | P23280 | CA6        | chr1:8945867    | Inverse variance weighted | 6  | -0.046 | 0.028 | 9.829E-02 | 0.777 | cis | Severe COVID-19 |
| 4254_6    | NUDC3                        | NudC domain-containing protein 3                                                           | Q8IVD9 | NUDC3      | chr7:44490658   | Wald ratio                | 1  | 0.372  | 0.225 | 9.833E-02 | 0.777 | cis | Severe COVID-19 |
| 16302_11  | SPLC2                        | BPI fold-containing family A member 2                                                      | Q960R5 | BP1FA2     | chr20:33161768  | Wald ratio                | 1  | -0.378 | 0.229 | 9.868E-02 | 0.777 | cis | Severe COVID-19 |
| 13954_9   | GNA1                         | Glucosamine 6-phosphate N-acetyltransferase                                                | Q96EK6 | GNPNAT1    | chr14:52791668  | Wald ratio                | 1  | -0.428 | 0.260 | 9.973E-02 | 0.782 | cis | Severe COVID-19 |
| 12399_194 | CCD50                        | Coiled-coil domain-containing protein 50                                                   | Q8IVM0 | CCDC50     | chr3:191329085  | Wald ratio                | 1  | -0.506 | 0.309 | 1.011E-01 | 0.789 | cis | Severe COVID-19 |
| 3003_29   | Nkp30                        | Natural cytotoxicity triggering receptor 3                                                 | O14931 | NCR3       | chr6:31593006   | Wald ratio                | 1  | 0.332  | 0.203 | 1.027E-01 | 0.792 | cis | Severe COVID-19 |
| 10339_48  | NSE                          | Gamma-enolase                                                                              | P09104 | ENO2       | chr12:6913745   | Wald ratio                | 1  | 0.290  | 0.178 | 1.028E-01 | 0.792 | cis | Severe COVID-19 |
| 15305_7   | Secretagogin                 | Secretagogin                                                                               | O76038 | SCGN       | chr6:25652201   | Inverse variance weighted | 2  | 0.443  | 0.271 | 1.029E-01 | 0.792 | cis | Severe COVID-19 |
| 9266_1    | sTREM-1                      | Triggering receptor expressed on myeloid cells 1                                           | Q9NP99 | TREM1      | chr6:41286682   | Inverse variance weighted | 6  | 0.131  | 0.081 | 1.042E-01 | 0.795 | cis | Severe COVID-19 |
| 4155_3    | Tenascin                     | Tenascin                                                                                   | P24821 | TNC        | chr9:115118207  | Inverse variance weighted | 12 | -0.055 | 0.034 | 1.053E-01 | 0.795 | cis | Severe COVID-19 |
| 3461_58   | PGCB                         | Brevican core protein                                                                      | Q96GW7 | BCAN       | chr1:156641390  | Inverse variance weighted | 2  | 0.120  | 0.074 | 1.057E-01 | 0.795 | cis | Severe COVID-19 |
| 2813_11   | ART                          | Agouti-related protein                                                                     | O00253 | AGRP       | chr16:67483547  | Inverse variance weighted | 2  | 0.130  | 0.080 | 1.066E-01 | 0.795 | cis | Severe COVID-19 |
| 18832_65  | SAA2                         | Serum amyloid A-2 protein                                                                  | P0DIJ9 | SAA2       | chr11:18248668  | Wald ratio                | 1  | -0.516 | 0.320 | 1.067E-01 | 0.795 | cis | Severe COVID-19 |
| 9185_15   | TFPI1                        | Trefoil factor 1                                                                           | Q04155 | TFPI1      | chr21:42366535  | Inverse variance weighted | 3  | 0.087  | 0.054 | 1.068E-01 | 0.795 | cis | Severe COVID-19 |
| 9748_31   | GSTM3-3                      | Glutathione S-transferase Mu 3                                                             | P21266 | GSTM3      | chr1:109741038  | Inverse variance weighted | 5  | 0.103  | 0.064 | 1.072E-01 | 0.795 | cis | Severe COVID-19 |
| 8795_48   | TR:ECD                       | Transferrin receptor protein 1:Extracellular domain                                        | P02786 | TFRC       | chr3:196082153  | Wald ratio                | 1  | 0.323  | 0.201 | 1.077E-01 | 0.795 | cis | Severe COVID-19 |
| 12940_35  | AL3B1                        | Aldehyde dehydrogenase family 3 member B1                                                  | P43353 | ALDH3B1    | chr11:68008578  | Wald ratio                | 1  | 0.214  | 0.133 | 1.079E-01 | 0.795 | cis | Severe COVID-19 |
| 13682_47  | M-CSF R                      | Macrophage colony-stimulating factor 1 receptor                                            | P07333 | CSF1R      | chr5:150113372  | Wald ratio                | 1  | -0.363 | 0.226 | 1.084E-01 | 0.795 | cis | Severe COVID-19 |
| 13986_6   | LANC1                        | LaNC-like protein 1                                                                        | O43813 | LANC1L     | chr2:210477652  | Inverse variance weighted | 2  | -0.300 | 0.187 | 1.085E-01 | 0.795 | cis | Severe COVID-19 |
| 18871_24  | AIIF1L                       | Allograft inflammatory factor 1-like                                                       | Q9BQI0 | AIIF1L     | chr9:131096476  | Inverse variance weighted | 5  | -0.079 | 0.049 | 1.093E-01 | 0.797 | cis | Severe COVID-19 |
| 19365_11  | BCAT2                        | Branched-chain-amino-acid aminotransferase, mitochondrial                                  | O15382 | BCAT2      | chr19:48811029  | Wald ratio                | 1  | 0.171  | 0.107 | 1.105E-01 | 0.803 | cis | Severe COVID-19 |

|           |                                 |                                                                                |        |           |                 |                           |    |        |       |           |       |     |                 |
|-----------|---------------------------------|--------------------------------------------------------------------------------|--------|-----------|-----------------|---------------------------|----|--------|-------|-----------|-------|-----|-----------------|
| 18899_82  | HDGR3                           | Hepatoma-derived growth factor-related protein 3                               | Q9Y3E1 | HDGFL3    | chr15:83207823  | Wald ratio                | 1  | -0.247 | 0.155 | 1.116E-01 | 0.807 | cis | Severe COVID-19 |
| 5111_15   | NRX3B                           | Neurexin-3-beta                                                                | Q9HD05 | NRXN3     | chr14:78170373  | Inverse variance weighted | 2  | -0.358 | 0.225 | 1.122E-01 | 0.808 | cis | Severe COVID-19 |
| 18174_79  | PDC6I                           | Programmed cell death 6-interacting protein                                    | Q8WUJ4 | PDCD6IP   | chr3:33798571   | Wald ratio                | 1  | -0.224 | 0.141 | 1.128E-01 | 0.809 | cis | Severe COVID-19 |
| 7206_20   | F16P1                           | Fructose-1,6-bisphosphatase 1                                                  | P09467 | FBP1      | chr9:94640249   | Inverse variance weighted | 2  | 0.247  | 0.156 | 1.136E-01 | 0.810 | cis | Severe COVID-19 |
| 15540_6   | Vimentin                        | Vimentin                                                                       | P08670 | VIM       | chr10:17228241  | Inverse variance weighted | 2  | 0.288  | 0.183 | 1.145E-01 | 0.810 | cis | Severe COVID-19 |
| 4127_75   | C6                              | Complement component C6                                                        | P13671 | C6        | chr5:41261438   | Inverse variance weighted | 4  | -0.120 | 0.076 | 1.147E-01 | 0.810 | cis | Severe COVID-19 |
| 17697_2   | OVCA2                           | Esterase OVCA2                                                                 | Q8W282 | OVCA2     | chr17:2042022   | Wald ratio                | 1  | -0.334 | 0.212 | 1.149E-01 | 0.810 | cis | Severe COVID-19 |
| 18337_4   | GMDS                            | GDP-mannose 4,6 dehydratase                                                    | G06547 | GMDS      | chr6:2245605    | Wald ratio                | 1  | -0.454 | 0.290 | 1.170E-01 | 0.820 | cis | Severe COVID-19 |
| 4498_62   | NCAM-120                        | Neural cell adhesion molecule 1, 120 kDa isoform                               | P13591 | NCAM1     | chr11:112961247 | Inverse variance weighted | 3  | 0.078  | 0.050 | 1.180E-01 | 0.820 | cis | Severe COVID-19 |
| 5091_28   | ILT-4                           | Leukocyte immunoglobulin-like receptor subfamily B member 2                    | Q8N423 | LILRB2    | chr19:54281184  | Inverse variance weighted | 4  | -0.224 | 0.144 | 1.186E-01 | 0.820 | cis | Severe COVID-19 |
| 3074_6    | LBP                             | Lipopolysaccharide-binding protein                                             | P18428 | LBP       | chr20:38346482  | Inverse variance weighted | 5  | -0.057 | 0.037 | 1.201E-01 | 0.820 | cis | Severe COVID-19 |
| 9747_48   | MARK3                           | MAP/microtubule affinity-regulating kinase 3                                   | P27448 | MARK3     | chr14:103385377 | Wald ratio                | 1  | 0.741  | 0.477 | 1.203E-01 | 0.820 | cis | Severe COVID-19 |
| 3805_16   | Endocan                         | Endothelial cell-specific molecule 1                                           | Q9NQ30 | ESM1      | chr5:55022671   | Inverse variance weighted | 3  | -0.150 | 0.097 | 1.217E-01 | 0.820 | cis | Severe COVID-19 |
| 7128_9    | VWA2                            | von Willebrand factor A domain-containing protein 2                            | Q5GFL6 | VWA2      | chr10:114239254 | Inverse variance weighted | 6  | 0.100  | 0.065 | 1.231E-01 | 0.820 | cis | Severe COVID-19 |
| 15566_10  | Calponin-1                      | Calponin-1                                                                     | P51911 | CNN1      | chr19:11538767  | Wald ratio                | 1  | 0.186  | 0.121 | 1.234E-01 | 0.820 | cis | Severe COVID-19 |
| 15435_4   | PNP                             | Purine nucleoside phosphorylase                                                | P00491 | PNP       | chr14:20461992  | Inverse variance weighted | 2  | -0.149 | 0.097 | 1.238E-01 | 0.820 | cis | Severe COVID-19 |
| 6342_10   | Nephronectin                    | Nephronectin                                                                   | G6UXI9 | NPNT      | chr4:105894775  | Inverse variance weighted | 3  | 0.383  | 0.249 | 1.244E-01 | 0.820 | cis | Severe COVID-19 |
| 5337_64   | B7-2                            | T-lymphocyte activation antigen CD86                                           | P42081 | CD86      | chr3:122055362  | Wald ratio                | 1  | -0.397 | 0.258 | 1.245E-01 | 0.820 | cis | Severe COVID-19 |
| 3186_2    | C2                              | Complement C2                                                                  | P06681 | C2        | chr6:31897785   | Wald ratio                | 1  | -0.255 | 0.166 | 1.248E-01 | 0.820 | cis | Severe COVID-19 |
| 4430_44   | Collectin Kidney 1              | Collectin-11                                                                   | Q9BWP8 | COLEC11   | chr2:3594832    | Inverse variance weighted | 10 | 0.048  | 0.031 | 1.249E-01 | 0.820 | cis | Severe COVID-19 |
| 9312_8    | AZGP1                           | Zinc-alpha-2-glycoprotein                                                      | P25311 | AZGP1     | chr7:99976042   | Inverse variance weighted | 3  | -0.366 | 0.238 | 1.250E-01 | 0.820 | cis | Severe COVID-19 |
| 3000_66   | MBL                             | Mannose-binding protein C                                                      | P11226 | MBL2      | chr10:52772784  | Inverse variance weighted | 9  | -0.042 | 0.027 | 1.253E-01 | 0.820 | cis | Severe COVID-19 |
| 15308_108 | VWC2                            | Borin                                                                          | Q2TAL6 | VWC2      | chr7:49773638   | Inverse variance weighted | 7  | 0.068  | 0.044 | 1.253E-01 | 0.820 | cis | Severe COVID-19 |
| 3210_1    | METAP1                          | Methionine aminopeptidase 1                                                    | P53582 | METAP1    | chr4:98995659   | Wald ratio                | 1  | 0.467  | 0.305 | 1.257E-01 | 0.820 | cis | Severe COVID-19 |
| 11646_4   | Carbohydrate sulfotransferase 9 | Carbohydrate sulfotransferase 9                                                | Q7L155 | CHST9     | chr18:27185308  | Inverse variance weighted | 4  | -0.082 | 0.054 | 1.261E-01 | 0.820 | cis | Severe COVID-19 |
| 15503_20  | Lefty-A                         | Left-right determination factor 2                                              | Q00292 | LEFTY2    | chr1:225941383  | Inverse variance weighted | 10 | 0.054  | 0.035 | 1.267E-01 | 0.820 | cis | Severe COVID-19 |
| 2190_55   | Coagulation Factor XI           | Coagulation Factor XI                                                          | P03951 | F11       | chr4:186266189  | Inverse variance weighted | 4  | -0.093 | 0.061 | 1.269E-01 | 0.820 | cis | Severe COVID-19 |
| 11248_43  | HEM4                            | Uroporphyrinogen-III synthase                                                  | P10746 | URO5      | chr10:125823258 | Inverse variance weighted | 4  | 0.115  | 0.076 | 1.272E-01 | 0.820 | cis | Severe COVID-19 |
| 17776_15  | PECR                            | Peroxisomal trans-2-enoyl-CoA reductase                                        | Q9BY49 | PECR      | chr2:216082955  | Wald ratio                | 1  | 0.240  | 0.158 | 1.279E-01 | 0.820 | cis | Severe COVID-19 |
| 5475_10   | PKC-B-II                        | Protein kinase C beta type (splice variant beta-II)                            | P05771 | PRKCB     | chr16:23835983  | Wald ratio                | 1  | -0.301 | 0.198 | 1.280E-01 | 0.820 | cis | Severe COVID-19 |
| 8403_18   | Fatty acid synthase             | Fatty acid synthase                                                            | P49327 | FASN      | chr17:82098294  | Wald ratio                | 1  | 0.161  | 0.106 | 1.283E-01 | 0.820 | cis | Severe COVID-19 |
| 13119_26  | protein Z inhibitor             | Protein Z-dependent protease inhibitor                                         | Q9UK55 | SERPINA10 | chr14:94293268  | Inverse variance weighted | 6  | 0.053  | 0.035 | 1.292E-01 | 0.820 | cis | Severe COVID-19 |
| 15222_6   | RD23B                           | UV excision repair protein RAD23 homolog B                                     | P54727 | RAD23B    | chr9:107283137  | Wald ratio                | 1  | 0.405  | 0.267 | 1.296E-01 | 0.820 | cis | Severe COVID-19 |
| 6359_50   | AGO61                           | Protein O-linked-mannose beta-1,4-N-acetylglucosaminyltransferase 2            | Q8NA11 | POMGNT2   | chr3:43106085   | Inverse variance weighted | 4  | -0.127 | 0.084 | 1.305E-01 | 0.820 | cis | Severe COVID-19 |
| 5227_60   | PKD1                            | [Pyruvate dehydrogenase (acetyl-transferring)] kinase isozyme 1, mitochondrial | Q15118 | PKD1      | chr2:172555373  | Inverse variance weighted | 3  | 0.157  | 0.104 | 1.308E-01 | 0.820 | cis | Severe COVID-19 |
| 16856_79  | MARE2                           | Microtubule-associated protein RP/EB family member 2                           | Q15555 | MAPRE2    | chr18:34976928  | Wald ratio                | 1  | -0.150 | 0.099 | 1.309E-01 | 0.820 | cis | Severe COVID-19 |
| 5610_32   | CJ038                           | Protein FAM171A1                                                               | Q5VU85 | FAM171A1  | chr10:15371289  | Inverse variance weighted | 2  | -0.277 | 0.184 | 1.310E-01 | 0.820 | cis | Severe COVID-19 |
| 8606_39   | GNPMB:CD                        | Transmembrane glycoprotein NMB:Cytoplasmic domain                              | Q14956 | GNPMB     | chr7:23235967   | Inverse variance weighted | 7  | -0.098 | 0.065 | 1.316E-01 | 0.821 | cis | Severe COVID-19 |
| 3820_68   | MAPK2                           | MAP kinase-activated protein kinase 2                                          | P49137 | MAPKAPK2  | chr1:206684905  | Wald ratio                | 1  | -0.129 | 0.086 | 1.321E-01 | 0.821 | cis | Severe COVID-19 |
| 8794_13   | DPEP1                           | Dipeptidase 1                                                                  | P16444 | DPEP1     | chr16:89613308  | Inverse variance weighted | 6  | 0.057  | 0.038 | 1.331E-01 | 0.821 | cis | Severe COVID-19 |
| 5731_1    | ISK6                            | Serine protease inhibitor Kazal-type 6                                         | Q6UWN8 | SPINK6    | chr15:148202794 | Inverse variance weighted | 9  | -0.058 | 0.038 | 1.335E-01 | 0.821 | cis | Severe COVID-19 |
| 9838_4    | SMAD1                           | Mothers against decapentaplegic homolog 1                                      | Q15797 | SMAD1     | chr4:145481194  | Wald ratio                | 1  | -0.449 | 0.300 | 1.335E-01 | 0.821 | cis | Severe COVID-19 |
| 9314_9    | PSG5                            | Pregnancy-specific beta-1-glycoprotein 5                                       | Q15238 | PSG5      | chr19:43186536  | Inverse variance weighted | 3  | -0.225 | 0.150 | 1.347E-01 | 0.821 | cis | Severe COVID-19 |
| 3283_21   | BGH3                            | Transforming growth factor-beta-induced protein ig-h3                          | Q15582 | TGFB1     | chr5:136028988  | Inverse variance weighted | 5  | -0.067 | 0.045 | 1.349E-01 | 0.821 | cis | Severe COVID-19 |
| 2579_17   | MMP-9                           | Matrix metalloproteinase-9                                                     | P14780 | MMP9      | chr20:46008908  | Wald ratio                | 1  | -0.299 | 0.200 | 1.352E-01 | 0.821 | cis | Severe COVID-19 |
| 4969_2    | Carbonic anhydrase I            | Carbonic anhydrase 1                                                           | P00915 | CA1       | chr8:85379014   | Inverse variance weighted | 3  | -0.157 | 0.105 | 1.355E-01 | 0.821 | cis | Severe COVID-19 |
| 3169_70   | IDUA                            | Alpha-L-iduronidase                                                            | P35475 | IDUA      | chr4:986997     | Inverse variance weighted | 7  | 0.090  | 0.061 | 1.375E-01 | 0.825 | cis | Severe COVID-19 |
| 12643_4   | ARRB1                           | Beta-arrestin-1                                                                | P49407 | ARRB1     | chr11:75351705  | Wald ratio                | 1  | -0.288 | 0.194 | 1.379E-01 | 0.825 | cis | Severe COVID-19 |
| 13669_6   | FGFR-3:ECD                      | Fibroblast growth factor receptor 3:Extracellular domain                       | P22607 | FGFR3     | chr4:1793293    | Inverse variance weighted | 4  | -0.111 | 0.075 | 1.380E-01 | 0.825 | cis | Severe COVID-19 |
| 15449_33  | TIM-4                           | T-cell immunoglobulin and mucin domain-containing protein 4                    | Q6H155 | TIMD4     | chr5:156963226  | Inverse variance weighted | 5  | -0.151 | 0.102 | 1.381E-01 | 0.825 | cis | Severe COVID-19 |
| 5687_5    | GLU2B                           | Glucosidase 2 subunit beta                                                     | P14314 | PRKCSH    | chr19:11435284  | Wald ratio                | 1  | 0.406  | 0.274 | 1.390E-01 | 0.827 | cis | Severe COVID-19 |
| 2620_4    | gp130, soluble                  | Interleukin-6 receptor subunit beta                                            | P40189 | IL6ST     | chr5:55995022   | Inverse variance weighted | 4  | 0.078  | 0.053 | 1.398E-01 | 0.829 | cis | Severe COVID-19 |
| 15299_102 | MESD2                           | LDLR chaperone MESD                                                            | Q14696 | MESD      | chr15:80989828  | Wald ratio                | 1  | 0.484  | 0.329 | 1.411E-01 | 0.832 | cis | Severe COVID-19 |
| 12370_30  | Apo F                           | Apolipoprotein F                                                               | Q13790 | APOF      | chr12:56362857  | Inverse variance weighted | 2  | -0.157 | 0.107 | 1.429E-01 | 0.832 | cis | Severe COVID-19 |
| 17856_23  | NTSM                            | 5'(3')-deoxyribonucleotidase, mitochondrial                                    | Q9NPB1 | NTSM      | chr17:17303335  | Wald ratio                | 1  | -0.184 | 0.126 | 1.431E-01 | 0.832 | cis | Severe COVID-19 |
| 9940_35   | DUS28                           | Dual specificity phosphatase 28                                                | Q4G0W2 | DUSP28    | chr2:240560054  | Inverse variance weighted | 2  | 0.168  | 0.115 | 1.433E-01 | 0.832 | cis | Severe COVID-19 |
| 5223_59   | GCKR                            | Glucokinase regulatory protein                                                 | Q14397 | GCKR      | chr2:27496839   | Wald ratio                | 1  | -0.236 | 0.161 | 1.433E-01 | 0.832 | cis | Severe COVID-19 |
| 13700_10  | annexin II                      | Annexin A2                                                                     | P07355 | ANXA2     | chr15:60402883  | Inverse variance weighted | 6  | -0.169 | 0.116 | 1.436E-01 | 0.832 | cis | Severe COVID-19 |
| 9638_2    | TIGIT                           | T-cell immunoreceptor with Ig and ITIM domains                                 | Q495A1 | TIGIT     | chr3:114276913  | Wald ratio                | 1  | -0.285 | 0.195 | 1.444E-01 | 0.832 | cis | Severe COVID-19 |
| 9409_11   | TRYB1                           | Tryptase beta-1                                                                | Q15661 | TPSAB1    | chr16:1240379   | Inverse variance weighted | 8  | 0.056  | 0.039 | 1.448E-01 | 0.832 | cis | Severe COVID-19 |
| 12347_29  | CCM2                            | Cerebral cavernous malformations 2 protein                                     | Q9BSQ5 | CCM2      | chr7:44999475   | Wald ratio                | 1  | -0.359 | 0.247 | 1.453E-01 | 0.832 | cis | Severe COVID-19 |
| 18382_109 | Catechol O-methyltransferase    | Catechol O-methyltransferase                                                   | P21964 | COMT      | chr22:19941371  | Wald ratio                | 1  | -0.246 | 0.169 | 1.457E-01 | 0.832 | cis | Severe COVID-19 |
| 16074_12  | GRB2-related adapter protein 2  | GRB2-related adapter protein 2                                                 | Q75791 | GRAP2     | chr22:39901084  | Wald ratio                | 1  | -0.675 | 0.464 | 1.458E-01 | 0.832 | cis | Severe COVID-19 |
| 15620_4   | NLGN1                           | Neuroigin-1                                                                    | Q8N2Q7 | NLGN1     | chr3:173396284  | Inverse variance weighted | 3  | 0.264  | 0.182 | 1.465E-01 | 0.832 | cis | Severe COVID-19 |
| 5483_1    | RGMA                            | Repulsive guidance molecule A                                                  | Q96B86 | RGMA      | chr15:93089211  | Inverse variance weighted | 4  | 0.116  | 0.080 | 1.468E-01 | 0.832 | cis | Severe COVID-19 |
| 3348_49   | BMP-1                           | Bone morphogenetic protein 1                                                   | P13497 | BMP1      | chr8:22165140   | Wald ratio                | 1  | 0.336  | 0.232 | 1.471E-01 | 0.832 | cis | Severe COVID-19 |
| 4989_7    | Fibrinogen g-chain dimer        | Fibrinogen gamma chain                                                         | P02679 | FGG       | chr4:154612967  | Wald ratio                | 1  | -0.150 | 0.104 | 1.485E-01 | 0.836 | cis | Severe COVID-19 |
| 18830_1   | Omentin                         | Intelectin-1                                                                   | Q8WWA0 | ITLN1     | chr1:160885180  | Wald ratio                | 1  | 0.375  | 0.260 | 1.489E-01 | 0.836 | cis | Severe COVID-19 |
| 13931_22  | PSMD9                           | 26S proteasome non-ATPase regulatory subunit 9                                 | Q00233 | PSMD9     | chr12:121888732 | Wald ratio                | 1  | 0.171  | 0.119 | 1.494E-01 | 0.836 | cis | Severe COVID-19 |
| 5238_26   | PP1E                            | Peptidyl-prolyl cis-trans isomerase E                                          | Q9UNP9 | PP1E      | chr1:39692182   | Inverse variance weighted | 2  | 0.074  | 0.051 | 1.499E-01 | 0.836 | cis | Severe COVID-19 |
| 17419_17  | TES                             | Testin                                                                         | Q9UGI8 | TES       | chr7:116210506  | Wald ratio                | 1  | -0.284 | 0.198 | 1.506E-01 | 0.838 | cis | Severe COVID-19 |
| 9744_139  | DNJA4                           | DnaI homolog subfamily A member 4                                              | Q8WW22 | DNIA4A    | chr15:78264086  | Wald ratio                | 1  | 0.451  | 0.315 | 1.519E-01 | 0.839 | cis | Severe COVID-19 |
| 6551_94   | Vaspin                          | Serpin A12                                                                     | Q8IW75 | SERPINA12 | chr14:94517844  | Inverse variance weighted | 5  | -0.060 | 0.042 | 1.520E-01 | 0.839 | cis | Severe COVID-19 |
| 4209_60   | DRG-1                           | Vacuolar protein sorting-associated protein VTA1 homolog                       | Q9NP79 | VTA1      | chr6:142147162  | Wald ratio                | 1  | -0.401 | 0.280 | 1.524E-01 | 0.839 | cis | Severe COVID-19 |
| 6984_6    | IGSF8                           | Immunoglobulin superfamily member 8                                            | Q96P90 | IGSF8     | chr1:160098943  | Inverse variance weighted | 2  | 0.144  | 0.101 | 1.531E-01 | 0.839 | cis | Severe COVID-19 |
| 17799_9   | 6PGL                            | 6-phosphogluconolactonase                                                      | Q95336 | PGLS      | chr19:17511636  | Inverse variance weighted | 3  | -0.257 | 0.180 | 1.535E-01 | 0.839 | cis | Severe COVID-19 |
| 3344_60   | Antithrombin III                | Antithrombin-III                                                               | P01008 | SERPINC1  | chr1:173917327  | Wald ratio                | 1  | 0.337  | 0.236 | 1.539E-01 | 0.839 | cis | Severe COVID-19 |
| 5316_54   | Prothrombin                     | Prothrombin                                                                    | P00734 | F2        | chr11:46719196  | Wald ratio                | 1  | 0.394  | 0.278 | 1.565E-01 | 0.849 | cis | Severe COVID-19 |

|           |                         |                                                                               |        |           |                 |                           |    |        |       |           |       |     |                 |
|-----------|-------------------------|-------------------------------------------------------------------------------|--------|-----------|-----------------|---------------------------|----|--------|-------|-----------|-------|-----|-----------------|
| 6393_63   | Endoplasmic             | Endoplasmic                                                                   | P14625 | HSP90B1   | chr12:103930107 | Inverse variance weighted | 6  | -0.034 | 0.024 | 1.575E-01 | 0.849 | cis | Severe COVID-19 |
| 10042_8   | SGK3                    | Serine/threonine-protein kinase Sgk3                                          | Q96BR1 | SGK3      | chr8:66712734   | Wald ratio                | 1  | 0.484  | 0.343 | 1.587E-01 | 0.849 | cis | Severe COVID-19 |
| 10630_5   | HTAI2                   | Oxidoreductase HTAI2P2                                                        | Q9BU3P | HTAI2P2   | chr11:20363685  | Inverse variance weighted | 9  | -0.056 | 0.039 | 1.588E-01 | 0.849 | cis | Severe COVID-19 |
| 5000_52   | LG3BP                   | Galectin-3-binding protein                                                    | Q08380 | LGALS3BP  | chr17:78979947  | Inverse variance weighted | 3  | -0.148 | 0.105 | 1.590E-01 | 0.849 | cis | Severe COVID-19 |
| 2797_56   | Apo B                   | Apolipoprotein B                                                              | P04114 | APOB      | chr2:21044073   | Wald ratio                | 1  | 0.290  | 0.206 | 1.590E-01 | 0.849 | cis | Severe COVID-19 |
| 11152_46  | kallikrein 13           | Kallikrein-13                                                                 | Q9UKR3 | KLK13     | chr19:51065114  | Wald ratio                | 1  | -0.257 | 0.183 | 1.593E-01 | 0.849 | cis | Severe COVID-19 |
| 2516_57   | 6CKine                  | C-C motif chemokine 21                                                        | O00585 | CCL21     | chr9:34710136   | Inverse variance weighted | 2  | 0.207  | 0.148 | 1.608E-01 | 0.849 | cis | Severe COVID-19 |
| 17331_138 | KREM1                   | Kremen protein 1                                                              | Q96MU8 | KREMEN1   | chr22:29073035  | Inverse variance weighted | 3  | -0.124 | 0.089 | 1.613E-01 | 0.849 | cis | Severe COVID-19 |
| 11615_16  | DAPP1                   | Dual adapter for phosphotyrosine and 3-phosphotyrosine and 3-phosphoinositide | Q9UN19 | DAPP1     | chr4:99816827   | Wald ratio                | 1  | 0.236  | 0.169 | 1.617E-01 | 0.849 | cis | Severe COVID-19 |
| 11530_37  | HEM3                    | Porphobilinogen deaminase                                                     | P08397 | HMB5      | chr11:119084866 | Wald ratio                | 1  | 0.407  | 0.292 | 1.624E-01 | 0.849 | cis | Severe COVID-19 |
| 19488_1   | PCDD6                   | Programmed cell death protein 6                                               | Q75340 | PCDD6     | chr5:271621     | Inverse variance weighted | 3  | 0.135  | 0.097 | 1.625E-01 | 0.849 | cis | Severe COVID-19 |
| 7784_1    | Kininogen, HMW          | Kininogen-1                                                                   | P01042 | KNG1      | chr3:186717348  | Inverse variance weighted | 2  | 0.322  | 0.230 | 1.625E-01 | 0.849 | cis | Severe COVID-19 |
| 3420_21   | Carbonic anhydrase XIII | Carbonic anhydrase 13                                                         | Q8N1Q1 | CA13      | chr8:85220587   | Inverse variance weighted | 3  | -0.076 | 0.054 | 1.635E-01 | 0.849 | cis | Severe COVID-19 |
| 19254_125 | GMFR1                   | GMP reductase 1                                                               | P36959 | GMFR      | chr6:16238587   | Inverse variance weighted | 8  | -0.034 | 0.025 | 1.637E-01 | 0.849 | cis | Severe COVID-19 |
| 8814_33   | SAPL1                   | Proactivator polypeptide-like 1                                               | Q6NUJ1 | PSAPL1    | chr4:7434930    | Inverse variance weighted | 8  | -0.056 | 0.040 | 1.638E-01 | 0.849 | cis | Severe COVID-19 |
| 15375_49  | Carboxypeptidase B1     | Carboxypeptidase B                                                            | P15086 | CPB1      | chr3:148791102  | Inverse variance weighted | 2  | 0.098  | 0.071 | 1.655E-01 | 0.855 | cis | Severe COVID-19 |
| 15395_15  | GST M1-1                | Glutathione S-transferase Mu 1                                                | O94488 | GSTM1     | chr1:109687814  | Inverse variance weighted | 5  | -0.127 | 0.092 | 1.670E-01 | 0.856 | cis | Severe COVID-19 |
| 7179_69   | NFASC                   | Neurofascin                                                                   | O94856 | NFASC     | chr1:204828651  | Inverse variance weighted | 4  | 0.057  | 0.041 | 1.671E-01 | 0.856 | cis | Severe COVID-19 |
| 5132_71   | TCCR                    | Interleukin-27 receptor subunit alpha                                         | Q6UWB1 | IL27RA    | chr19:14031762  | Inverse variance weighted | 6  | -0.058 | 0.042 | 1.672E-01 | 0.856 | cis | Severe COVID-19 |
| 7921_65   | FIX1                    | Four-jointed box protein 1                                                    | Q86VR8 | FIX1      | chr11:35618460  | Inverse variance weighted | 4  | 0.080  | 0.058 | 1.687E-01 | 0.860 | cis | Severe COVID-19 |
| 11134_30  | RF1ML                   | Peptide chain release factor 1-like, mitochondrial                            | Q9UGC7 | MTRF1L    | chr6:153002709  | Wald ratio                | 1  | 0.130  | 0.094 | 1.690E-01 | 0.860 | cis | Severe COVID-19 |
| 10974_20  | ISK7                    | Serine protease inhibitor Kazal-type 7                                        | P58062 | SPINK7    | chr5:148312419  | Wald ratio                | 1  | -0.177 | 0.129 | 1.700E-01 | 0.860 | cis | Severe COVID-19 |
| 14054_17  | IL-15 Ra                | Interleukin-15 receptor subunit alpha                                         | Q13261 | IL15RA    | chr10:5978187   | Inverse variance weighted | 5  | 0.052  | 0.038 | 1.701E-01 | 0.860 | cis | Severe COVID-19 |
| 6923_1    | PLOD2                   | Procollagen-lysine,2-oxoglutarate 5-dioxygenase 2                             | O00469 | PLOD2     | chr3:146163725  | Inverse variance weighted | 2  | -0.192 | 0.140 | 1.705E-01 | 0.860 | cis | Severe COVID-19 |
| 3581_53   | a2-HS-Glycoprotein      | Alpha-2-HS-glycoprotein                                                       | P02765 | AHSG      | chr3:186613060  | Inverse variance weighted | 4  | -0.155 | 0.113 | 1.712E-01 | 0.861 | cis | Severe COVID-19 |
| 9343_16   | IL-2 sRb                | Interleukin-2 receptor subunit beta                                           | P14784 | IL2RB     | chr22:37175118  | Wald ratio                | 1  | -0.271 | 0.199 | 1.731E-01 | 0.864 | cis | Severe COVID-19 |
| 13450_49  | UBP8                    | Ubiquitin carboxyl-terminal hydrolase 8                                       | P40818 | USP8      | chr15:50424380  | Wald ratio                | 1  | 0.244  | 0.179 | 1.743E-01 | 0.864 | cis | Severe COVID-19 |
| 6556_5    | ENPP5                   | Ectonucleotide pyrophosphatase/phosphodiesterase family member 5              | Q9UIA9 | ENPP5     | chr6:46170980   | Inverse variance weighted | 7  | -0.045 | 0.033 | 1.748E-01 | 0.864 | cis | Severe COVID-19 |
| 4721_54   | TFF3                    | Trefoil factor 3                                                              | Q07654 | TFF3      | chr21:42315409  | Inverse variance weighted | 2  | -0.227 | 0.167 | 1.751E-01 | 0.864 | cis | Severe COVID-19 |
| 6223_5    | GUC2B                   | Guanylate cyclase activator 2B                                                | Q16661 | GUCAC2B   | chr1:42153410   | Inverse variance weighted | 2  | -0.294 | 0.217 | 1.756E-01 | 0.864 | cis | Severe COVID-19 |
| 17384_110 | K6PF                    | ATP-dependent 6-phosphofructokinase, muscle type                              | P08237 | PFKM      | chr12:48105139  | Wald ratio                | 1  | -0.205 | 0.151 | 1.757E-01 | 0.864 | cis | Severe COVID-19 |
| 6462_12   | TIMP-4                  | Metalloproteinase inhibitor 4                                                 | Q99727 | TIMP4     | chr3:12158912   | Inverse variance weighted | 8  | -0.084 | 0.062 | 1.769E-01 | 0.864 | cis | Severe COVID-19 |
| 2611_72   | Dtk                     | Tyrosine-protein kinase receptor TYRO3                                        | Q06418 | TYRO3     | chr15:41557675  | Wald ratio                | 1  | 0.204  | 0.151 | 1.776E-01 | 0.864 | cis | Severe COVID-19 |
| 5628_21   | SEM3G                   | Semaphorin-3G                                                                 | Q9NS98 | SEMA3G    | chr3:52445103   | Inverse variance weighted | 5  | 0.157  | 0.116 | 1.776E-01 | 0.864 | cis | Severe COVID-19 |
| 11308_8   | CR3L4                   | Cyclic AMP-responsive element-binding protein 3-like protein 4                | Q8TEY5 | CREB3L4   | chr1:153967534  | Inverse variance weighted | 2  | 0.145  | 0.108 | 1.776E-01 | 0.864 | cis | Severe COVID-19 |
| 2700_56   | Protein S               | Vitamin K-dependent protein S                                                 | P07225 | PROS1     | chr3:93980003   | Wald ratio                | 1  | -0.337 | 0.250 | 1.782E-01 | 0.864 | cis | Severe COVID-19 |
| 19238_12  | GLNA                    | Glutamine synthetase                                                          | P15104 | GLUL      | chr1:182392206  | Wald ratio                | 1  | -0.402 | 0.299 | 1.785E-01 | 0.864 | cis | Severe COVID-19 |
| 5581_28   | FGL1                    | Fibrinogen-like protein 1                                                     | Q08830 | FGL1      | chr8:17910365   | Inverse variance weighted | 7  | 0.045  | 0.034 | 1.785E-01 | 0.864 | cis | Severe COVID-19 |
| 17686_27  | TBCB                    | Tubulin-folding cofactor B                                                    | Q99426 | TBCB      | chr19:36114289  | Wald ratio                | 1  | 0.319  | 0.238 | 1.793E-01 | 0.866 | cis | Severe COVID-19 |
| 4464_10   | Sialoadhesin            | Sialoadhesin                                                                  | Q9BZ22 | SIGLEC1   | chr20:3712600   | Wald ratio                | 1  | 0.433  | 0.323 | 1.800E-01 | 0.866 | cis | Severe COVID-19 |
| 2737_22   | NovH                    | Protein NOV homolog                                                           | P48745 | CN3       | chr8:119416446  | Wald ratio                | 1  | 0.292  | 0.218 | 1.803E-01 | 0.866 | cis | Severe COVID-19 |
| 10605_22  | APMAP                   | Adipocyte plasma membrane-associated protein                                  | Q9HDC9 | APMAP     | chr20:24992751  | Wald ratio                | 1  | 0.351  | 0.262 | 1.812E-01 | 0.868 | cis | Severe COVID-19 |
| 8244_16   | FUT8                    | Alpha-(1,6)-fucosyltransferase                                                | Q9BYC5 | FUT8      | chr14:65410592  | Inverse variance weighted | 10 | -0.039 | 0.029 | 1.824E-01 | 0.871 | cis | Severe COVID-19 |
| 19448_104 | UPP1                    | Uridine phosphorylase 1                                                       | Q16831 | UPP1      | chr7:48088628   | Wald ratio                | 1  | -0.280 | 0.211 | 1.829E-01 | 0.871 | cis | Severe COVID-19 |
| 16915_153 | SEM4A                   | Semaphorin-4A                                                                 | Q9H351 | SEMA4A    | chr1:156147366  | Wald ratio                | 1  | 0.116  | 0.087 | 1.844E-01 | 0.873 | cis | Severe COVID-19 |
| 2677_1    | ERBB1                   | Epidermal growth factor receptor                                              | P00533 | EGFR      | chr7:55019017   | Inverse variance weighted | 3  | 0.139  | 0.105 | 1.844E-01 | 0.873 | cis | Severe COVID-19 |
| 3435_53   | FN1.4                   | Fibronectin Fragment 4                                                        | P02751 | FN1       | chr2:215436073  | Wald ratio                | 1  | 0.775  | 0.585 | 1.853E-01 | 0.873 | cis | Severe COVID-19 |
| 8982_65   | TSP3                    | Thrombospondin-3                                                              | P49746 | THBS3     | chr1:155209051  | Inverse variance weighted | 3  | -0.157 | 0.119 | 1.857E-01 | 0.873 | cis | Severe COVID-19 |
| 17694_32  | PSME2                   | Proteasome activator complex subunit 2                                        | Q9UL46 | PSME2     | chr14:24147570  | Inverse variance weighted | 2  | -0.204 | 0.155 | 1.861E-01 | 0.873 | cis | Severe COVID-19 |
| 15576_158 | ECP                     | Eosinophil cationic protein                                                   | P12724 | RNASE3    | chr14:20891385  | Inverse variance weighted | 5  | 0.051  | 0.039 | 1.881E-01 | 0.879 | cis | Severe COVID-19 |
| 14205_6   | HEX12                   | Protein HEXIM2                                                                | Q96MH2 | HEXIM2    | chr17:45160700  | Wald ratio                | 1  | 0.426  | 0.324 | 1.884E-01 | 0.879 | cis | Severe COVID-19 |
| 2828_82   | HAI-1                   | Kunitz-type protease inhibitor 1                                              | O43278 | SPINT1    | chr15:40844018  | Inverse variance weighted | 2  | -0.120 | 0.092 | 1.888E-01 | 0.879 | cis | Severe COVID-19 |
| 8296_117  | KDEL2                   | KDEL motif-containing protein 2                                               | Q724H8 | POGLUT3   | chr11:108498405 | Inverse variance weighted | 6  | 0.052  | 0.039 | 1.907E-01 | 0.885 | cis | Severe COVID-19 |
| 15558_63  | AMPE                    | Glutamyl aminopeptidase                                                       | Q07075 | ENPEP     | chr4:110365733  | Inverse variance weighted | 8  | 0.056  | 0.043 | 1.932E-01 | 0.894 | cis | Severe COVID-19 |
| 6366_38   | TXD15                   | Thioredoxin domain-containing protein 15                                      | Q96J42 | TXNDC15   | chr5:134874371  | Inverse variance weighted | 3  | 0.072  | 0.055 | 1.959E-01 | 0.903 | cis | Severe COVID-19 |
| 9249_17   | TMEM9:ECD               | Transmembrane protein 9:Extracellular domain                                  | Q9P077 | TMEM9     | chr1:201171574  | Wald ratio                | 1  | -0.301 | 0.234 | 1.973E-01 | 0.903 | cis | Severe COVID-19 |
| 7099_33   | FSTL5                   | Follistatin-related protein 5                                                 | Q8N475 | FSTL5     | chr4:162164004  | Wald ratio                | 1  | 0.189  | 0.147 | 1.974E-01 | 0.903 | cis | Severe COVID-19 |
| 8866_53   | QPCTL                   | Glutaminyl-peptide cyclotransferase-like protein                              | Q9NXS2 | QPCTL     | chr19:45692403  | Inverse variance weighted | 6  | -0.059 | 0.046 | 1.982E-01 | 0.903 | cis | Severe COVID-19 |
| 4867_15   | VEGF121                 | Vascular endothelial growth factor A, isoform 121                             | P15692 | VEGFA     | chr6:43770184   | Inverse variance weighted | 4  | 0.177  | 0.137 | 1.982E-01 | 0.903 | cis | Severe COVID-19 |
| 19557_3   | KLT0B                   | Beta-klotho                                                                   | Q86214 | KL8       | chr4:39406930   | Inverse variance weighted | 8  | 0.060  | 0.046 | 1.983E-01 | 0.903 | cis | Severe COVID-19 |
| 17460_51  | Mx1                     | Interferon-induced GTP-binding protein Mx1                                    | P20591 | MX1       | chr21:41420020  | Inverse variance weighted | 4  | -0.110 | 0.086 | 1.994E-01 | 0.904 | cis | Severe COVID-19 |
| 9796_4    | CEL                     | Bile salt-activated lipase                                                    | P19835 | CEL       | chr9:133061981  | Inverse variance weighted | 5  | -0.092 | 0.072 | 1.996E-01 | 0.904 | cis | Severe COVID-19 |
| 7856_51   | F151A                   | Protein FAM151A                                                               | Q8WW52 | FAM151A   | chr1:54623556   | Inverse variance weighted | 5  | -0.071 | 0.055 | 2.000E-01 | 0.904 | cis | Severe COVID-19 |
| 5103_30   | MO2R1:ECD               | Cell surface glycoprotein CD200 receptor 1:isoform 4, Extracellular Domain    | Q8TD46 | CD200R1   | chr3:112975103  | Wald ratio                | 1  | 0.170  | 0.133 | 2.011E-01 | 0.904 | cis | Severe COVID-19 |
| 5463_22   | GAS1                    | Growth arrest-specific protein 1                                              | P54826 | GAS1      | chr9:86947506   | Inverse variance weighted | 2  | -0.167 | 0.131 | 2.012E-01 | 0.904 | cis | Severe COVID-19 |
| 12486_8   | GLRX2                   | Glutaredoxin-2, mitochondrial                                                 | Q9NS18 | GLRX2     | chr1:193106114  | Inverse variance weighted | 3  | 0.121  | 0.095 | 2.037E-01 | 0.913 | cis | Severe COVID-19 |
| 7192_37   | CRF2-12                 | Interferon lambda receptor 1                                                  | Q8IU57 | IFNLRL1   | chr1:24187959   | Inverse variance weighted | 3  | -0.112 | 0.089 | 2.054E-01 | 0.918 | cis | Severe COVID-19 |
| 3196_6    | HPLN1                   | Hyaluronan and proteoglycan link protein 1                                    | P10915 | HAPLN1    | chr5:83720855   | Inverse variance weighted | 3  | -0.145 | 0.114 | 2.063E-01 | 0.919 | cis | Severe COVID-19 |
| 3311_27   | FCG3B                   | Low affinity immunoglobulin gamma Fc region receptor III-B                    | Q75015 | FCGR3B    | chr1:161631963  | Wald ratio                | 1  | -0.407 | 0.323 | 2.069E-01 | 0.919 | cis | Severe COVID-19 |
| 9002_36   | SAP11                   | Serpin A11                                                                    | Q86U17 | SERPINA11 | chr14:94452800  | Inverse variance weighted | 5  | -0.127 | 0.101 | 2.081E-01 | 0.919 | cis | Severe COVID-19 |
| 15417_3   | Maspin                  | Serpin B5                                                                     | P36952 | SERPINS5  | chr18:63476958  | Wald ratio                | 1  | -0.147 | 0.117 | 2.085E-01 | 0.919 | cis | Severe COVID-19 |
| 15526_33  | GSHB                    | Glutathione synthetase                                                        | P48637 | GSS       | chr20:34956027  | Inverse variance weighted | 2  | 0.134  | 0.106 | 2.089E-01 | 0.919 | cis | Severe COVID-19 |
| 13748_4   | MCP-2                   | C-C motif chemokine 8                                                         | P80075 | CCL8      | chr17:34319435  | Inverse variance weighted | 7  | 0.061  | 0.049 | 2.096E-01 | 0.919 | cis | Severe COVID-19 |
| 8778_3    | Noggin                  | Noggin                                                                        | Q13253 | NOG       | chr17:56593699  | Inverse variance weighted | 5  | 0.079  | 0.063 | 2.098E-01 | 0.919 | cis | Severe COVID-19 |
| 9385_4    | GAA                     | Lysosomal alpha-glucosidase                                                   | P10253 | GAA       | chr17:80101556  | Inverse variance weighted | 6  | -0.115 | 0.091 | 2.101E-01 | 0.919 | cis | Severe COVID-19 |
| 12517_52  | TFAR19                  | Programmed cell death protein 5                                               | O14737 | PCDD5     | chr19:32581190  | Inverse variance weighted | 4  | -0.090 | 0.072 | 2.110E-01 | 0.919 | cis | Severe COVID-19 |
| 3194_36   | GPVI                    | Platelet glycoprotein VI                                                      | Q9HCN6 | GP6       | chr19:55038264  | Inverse variance weighted | 2  | 0.071  | 0.057 | 2.110E-01 | 0.919 | cis | Severe COVID-19 |
| 15441_6   | SAP2                    | Ganglioside GM2 activator                                                     | P17900 | GM2A      | chr5:151212150  | Inverse variance weighted | 3  | -0.064 | 0.051 | 2.119E-01 | 0.919 | cis | Severe COVID-19 |

|           |                              |                                                                           |        |           |                 |                           |    |        |       |           |       |     |                 |
|-----------|------------------------------|---------------------------------------------------------------------------|--------|-----------|-----------------|---------------------------|----|--------|-------|-----------|-------|-----|-----------------|
| 11098_1   | PDXK                         | Pyridoxal kinase                                                          | O00764 | PDXK      | chr21:43719094  | Inverse variance weighted | 5  | -0.140 | 0.112 | 2.124E-01 | 0.919 | cis | Severe COVID-19 |
| 9341_1    | PDGFD                        | Platelet-derived growth factor D                                          | Q9GZP0 | PDGFD     | chr11:104164379 | Inverse variance weighted | 3  | -0.194 | 0.156 | 2.130E-01 | 0.919 | cis | Severe COVID-19 |
| 11649_3   | SMAP1                        | Stromal membrane-associated protein 1                                     | Q8IYB5 | SMAP1     | chr6:70667776   | Inverse variance weighted | 4  | -0.058 | 0.047 | 2.134E-01 | 0.919 | cis | Severe COVID-19 |
| 15636_49  | SORC1                        | VS10 domain-containing receptor SorCS1                                    | Q8WY21 | SORC1     | chr10:107164706 | Wald ratio                | 1  | -0.287 | 0.231 | 2.142E-01 | 0.921 | cis | Severe COVID-19 |
| 17513_11  | ANX11                        | Annexin A11                                                               | P50995 | ANX11     | chr10:80205572  | Inverse variance weighted | 3  | 0.149  | 0.120 | 2.153E-01 | 0.923 | cis | Severe COVID-19 |
| 15367_38  | LPCL1                        | BPI fold-containing family B member 1                                     | Q8TDL5 | BP1FB1    | chr20:33273480  | Inverse variance weighted | 7  | 0.050  | 0.040 | 2.158E-01 | 0.923 | cis | Severe COVID-19 |
| 18280_29  | DT02                         | Putative D-tyrosyl-tRNA(Tyr) deacylase 2                                  | Q96FN9 | DT02      | chr14:31457506  | Inverse variance weighted | 2  | -0.180 | 0.146 | 2.168E-01 | 0.925 | cis | Severe COVID-19 |
| 17738_7   | CRNN                         | Cornulin                                                                  | Q0UBG3 | CRNN      | chr1:152414263  | Wald ratio                | 1  | 0.138  | 0.112 | 2.183E-01 | 0.929 | cis | Severe COVID-19 |
| 13704_5   | HMC52                        | Hydroxymethylglutaryl-CoA synthase, mitochondrial                         | P54868 | HMGCS2    | chr1:119768905  | Wald ratio                | 1  | -0.486 | 0.396 | 2.202E-01 | 0.930 | cis | Severe COVID-19 |
| 9931_20   | Keratin-1                    | Keratin, type II cytoskeletal 1                                           | P04264 | KRT1      | chr12:52680407  | Wald ratio                | 1  | -0.564 | 0.461 | 2.205E-01 | 0.930 | cis | Severe COVID-19 |
| 11493_169 | DYL2                         | Dynein light chain 2, cytoplasmic                                         | Q96FJ2 | DYNL2     | chr17:58083419  | Wald ratio                | 1  | -0.357 | 0.292 | 2.212E-01 | 0.930 | cis | Severe COVID-19 |
| 10015_119 | KCAB2                        | Voltage-gated potassium channel subunit beta-2                            | Q13303 | KCNAB2    | chr1:5990927    | Inverse variance weighted | 2  | -0.238 | 0.195 | 2.214E-01 | 0.930 | cis | Severe COVID-19 |
| 12457_10  | MTND                         | 1,2-dihydroxy-3-keto-5-methylthiopentene dioxygenase                      | Q98V57 | ADI1      | chr2:3519531    | Wald ratio                | 1  | 0.321  | 0.263 | 2.218E-01 | 0.930 | cis | Severe COVID-19 |
| 12612_37  | PSB1                         | Proteasome subunit beta type-1                                            | P20618 | PSMB1     | chr6:170553307  | Inverse variance weighted | 2  | 0.058  | 0.047 | 2.219E-01 | 0.930 | cis | Severe COVID-19 |
| 19602_36  | jun-D                        | Transcription factor jun-D                                                | P17535 | JUND      | chr19:18281622  | Wald ratio                | 1  | -0.367 | 0.301 | 2.237E-01 | 0.935 | cis | Severe COVID-19 |
| 5586_66   | MINP1                        | Multiple inositol polyphosphate phosphatase 1                             | Q9UNW1 | MINPP1    | chr10:87504875  | Wald ratio                | 1  | 0.296  | 0.243 | 2.241E-01 | 0.935 | cis | Severe COVID-19 |
| 10672_75  | SP-B                         | Pulmonary surfactant-associated protein B                                 | P07988 | SFTPB     | chr2:85668741   | Inverse variance weighted | 4  | 0.166  | 0.137 | 2.265E-01 | 0.940 | cis | Severe COVID-19 |
| 4151_6    | Plasminogen                  | Plasminogen                                                               | P00747 | PLG       | chr6:160702194  | Inverse variance weighted | 3  | -0.172 | 0.142 | 2.265E-01 | 0.940 | cis | Severe COVID-19 |
| 5837_49   | LIF sR                       | Leukemia inhibitory factor receptor                                       | P42702 | LIFR      | chr5:38608354   | Inverse variance weighted | 4  | 0.111  | 0.092 | 2.275E-01 | 0.940 | cis | Severe COVID-19 |
| 3600_2    | Chitotriosidase-1            | Chitotriosidase-1                                                         | Q13231 | CHIT1     | chr1:203273641  | Inverse variance weighted | 6  | 0.037  | 0.031 | 2.286E-01 | 0.940 | cis | Severe COVID-19 |
| 6713_4    | LRP11                        | Low-density lipoprotein receptor-related protein 11                       | Q86V24 | LRP11     | chr6:149864359  | Inverse variance weighted | 8  | 0.060  | 0.050 | 2.301E-01 | 0.940 | cis | Severe COVID-19 |
| 10372_18  | STAT6                        | Signal transducer and activator of transcription 6                        | P42226 | STAT6     | chr12:57132139  | Inverse variance weighted | 2  | 0.126  | 0.105 | 2.302E-01 | 0.940 | cis | Severe COVID-19 |
| 9886_28   | XRCC4                        | DNA repair protein XRCC4                                                  | Q13426 | XRCC4     | chr5:83077498   | Wald ratio                | 1  | 0.176  | 0.147 | 2.308E-01 | 0.940 | cis | Severe COVID-19 |
| 3324_51   | LY9                          | T-lymphocyte surface antigen Ly-9                                         | Q9HBG7 | LY9       | chr1:160796074  | Inverse variance weighted | 5  | 0.101  | 0.084 | 2.309E-01 | 0.940 | cis | Severe COVID-19 |
| 8235_48   | SCG1                         | Secretogranin-1                                                           | P05060 | CHGB      | chr20:59115110  | Wald ratio                | 1  | 0.230  | 0.192 | 2.312E-01 | 0.940 | cis | Severe COVID-19 |
| 16919_1   | ACBP                         | Acyl-CoA-binding protein                                                  | P07108 | DBI       | chr2:2119366924 | Inverse variance weighted | 2  | 0.101  | 0.084 | 2.315E-01 | 0.940 | cis | Severe COVID-19 |
| 12727_7   | FRPR                         | Prostaglandin F2 receptor negative regulator                              | Q9P282 | PTGFRN    | chr1:116909916  | Inverse variance weighted | 8  | 0.056  | 0.047 | 2.320E-01 | 0.940 | cis | Severe COVID-19 |
| 12684_5   | ADSV                         | Adseverin                                                                 | Q9Y6J3 | SCIN      | chr7:12570577   | Wald ratio                | 1  | 0.273  | 0.228 | 2.323E-01 | 0.940 | cis | Severe COVID-19 |
| 5487_7    | SLAF7                        | SLAM family member 7                                                      | Q9N025 | SLAMF7    | chr1:160739057  | Inverse variance weighted | 7  | 0.037  | 0.031 | 2.326E-01 | 0.940 | cis | Severe COVID-19 |
| 12859_33  | PECI                         | Enoyl-CoA delta isomerase 2, mitochondrial                                | O75521 | ECI2      | chr6:4135597    | Inverse variance weighted | 3  | -0.075 | 0.063 | 2.334E-01 | 0.941 | cis | Severe COVID-19 |
| 14273_19  | PPCE                         | Prolyl endopeptidase                                                      | P48147 | PREP      | chr6:105454062  | Inverse variance weighted | 2  | -0.108 | 0.091 | 2.348E-01 | 0.943 | cis | Severe COVID-19 |
| 8458_111  | a-Synuclein                  | Alpha-synuclein                                                           | P37840 | SNCA      | chr4:89838315   | Wald ratio                | 1  | 0.476  | 0.402 | 2.357E-01 | 0.943 | cis | Severe COVID-19 |
| 17698_15  | WBP2                         | VW domain-binding protein 2                                               | Q96979 | WBP2      | chr17:75856507  | Wald ratio                | 1  | -0.457 | 0.386 | 2.360E-01 | 0.943 | cis | Severe COVID-19 |
| 10561_5   | PGRP-I-alpha                 | Peptidoglycan recognition protein 3                                       | Q96L89 | PGLYRP3   | chr1:153312952  | Wald ratio                | 1  | -0.362 | 0.306 | 2.362E-01 | 0.943 | cis | Severe COVID-19 |
| 2742_68   | Siglec-7                     | Sialic acid-binding Ig-like lectin 7                                      | Q9Y286 | SIGLEC7   | chr19:51142299  | Wald ratio                | 1  | 0.171  | 0.145 | 2.387E-01 | 0.948 | cis | Severe COVID-19 |
| 19187_21  | STABP                        | STAM-binding protein                                                      | Q95630 | STAMBIP   | chr2:73828916   | Inverse variance weighted | 2  | 0.241  | 0.204 | 2.394E-01 | 0.948 | cis | Severe COVID-19 |
| 15370_5   | BOLA1                        | BoLA-like protein 1                                                       | Q9Y3E2 | BOLA1     | chr1:149887890  | Inverse variance weighted | 2  | -0.061 | 0.052 | 2.395E-01 | 0.948 | cis | Severe COVID-19 |
| 3459_49   | PDGF Rb                      | Platelet-derived growth factor receptor beta                              | Q90619 | PDGFRB    | chr5:150155872  | Inverse variance weighted | 11 | -0.019 | 0.017 | 2.397E-01 | 0.948 | cis | Severe COVID-19 |
| 8325_37   | ADH4                         | Alcohol dehydrogenase 4                                                   | P08319 | ADH4      | chr4:99157792   | Wald ratio                | 1  | -0.218 | 0.186 | 2.405E-01 | 0.948 | cis | Severe COVID-19 |
| 5018_68   | Peroxiredoxin-6              | Peroxiredoxin-6                                                           | P30041 | PRDX6     | chr1:173477330  | Wald ratio                | 1  | 0.295  | 0.252 | 2.426E-01 | 0.948 | cis | Severe COVID-19 |
| 3518_54   | TAFI                         | Carboxypeptidase B2                                                       | Q96IY4 | CPB2      | chr13:46105033  | Inverse variance weighted | 5  | 0.052  | 0.045 | 2.439E-01 | 0.948 | cis | Severe COVID-19 |
| 13969_24  | IMA7                         | Importin subunit alpha-7                                                  | O60684 | KPNAB     | chr1:32108056   | Wald ratio                | 1  | 0.302  | 0.260 | 2.443E-01 | 0.948 | cis | Severe COVID-19 |
| 9183_7    | IFN-a/b R1                   | Interferon alpha/beta receptor 1                                          | P17181 | IFNAR1    | chr21:33324387  | Inverse variance weighted | 7  | 0.046  | 0.040 | 2.450E-01 | 0.948 | cis | Severe COVID-19 |
| 14101_2   | CNTRF alpha                  | Ciliary neurotrophic factor receptor subunit alpha                        | P26992 | CNTRF     | chr9:34590140   | Inverse variance weighted | 2  | -0.127 | 0.110 | 2.455E-01 | 0.948 | cis | Severe COVID-19 |
| 11333_82  | RHG25                        | Rho GTPase-activating protein 25                                          | P42331 | ARHGAP25  | chr2:68679601   | Wald ratio                | 1  | 0.119  | 0.103 | 2.455E-01 | 0.948 | cis | Severe COVID-19 |
| 14106_46  | GDP/GTP exchange protein     | Rap1 GTPase-GDP dissociation stimulator 1                                 | P52306 | RAP1GDS1  | chr4:98261384   | Wald ratio                | 1  | 0.347  | 0.299 | 2.457E-01 | 0.948 | cis | Severe COVID-19 |
| 6947_4    | SIA10                        | Type 2 lactosamine alpha-2,3-sialyltransferase                            | Q9Y274 | ST3GAL6   | chr3:98732236   | Inverse variance weighted | 9  | -0.028 | 0.024 | 2.461E-01 | 0.948 | cis | Severe COVID-19 |
| 6507_16   | NCAM2                        | Neural cell adhesion molecule 2                                           | O15394 | NCAM2     | chr21:20998409  | Inverse variance weighted | 6  | 0.038  | 0.033 | 2.477E-01 | 0.948 | cis | Severe COVID-19 |
| 12975_11  | Keratin 20                   | Keratin, type I cytoskeletal 20                                           | P35900 | KRT20     | chr17:40885242  | Inverse variance weighted | 2  | -0.244 | 0.211 | 2.479E-01 | 0.948 | cis | Severe COVID-19 |
| 9231_23   | IMP3                         | Inositol monophosphatase 3                                                | Q9NKG2 | BPNT2     | chr8:56993867   | Inverse variance weighted | 6  | -0.048 | 0.041 | 2.490E-01 | 0.948 | cis | Severe COVID-19 |
| 8065_245  | PATE4                        | Prostate and testis expressed protein 4                                   | POC8F1 | PATE4     | chr11:125833316 | Wald ratio                | 1  | -0.140 | 0.122 | 2.492E-01 | 0.948 | cis | Severe COVID-19 |
| 4913_78   | HCC-4                        | C-C motif chemokine 16                                                    | O15467 | CCL16     | chr17:35981497  | Inverse variance weighted | 8  | -0.034 | 0.029 | 2.493E-01 | 0.948 | cis | Severe COVID-19 |
| 2982_82   | Galectin-4                   | Galectin-4                                                                | P56470 | LGALS4    | chr19:38812945  | Wald ratio                | 1  | -0.312 | 0.271 | 2.495E-01 | 0.948 | cis | Severe COVID-19 |
| 4437_56   | ENTP5                        | Ectonucleoside triphosphate diphosphohydrolase 5                          | O75356 | ENTPD5    | chr14:74019399  | Inverse variance weighted | 8  | 0.037  | 0.032 | 2.504E-01 | 0.948 | cis | Severe COVID-19 |
| 6467_65   | KTEL1                        | Protein O-glucosyltransferase 1                                           | Q8NBL1 | POGLUT1   | chr3:119468963  | Inverse variance weighted | 3  | -0.096 | 0.084 | 2.516E-01 | 0.948 | cis | Severe COVID-19 |
| 3024_18   | a2-Antiplasmin               | Alpha-2-antiplasmin                                                       | P08697 | SERPINF2  | chr17:1742836   | Inverse variance weighted | 3  | 0.128  | 0.112 | 2.516E-01 | 0.948 | cis | Severe COVID-19 |
| 11643_73  | DTX3L                        | E3 ubiquitin-protein ligase DTX3L                                         | Q8TD86 | DTX3L     | chr3:122564338  | Wald ratio                | 1  | -0.401 | 0.349 | 2.517E-01 | 0.948 | cis | Severe COVID-19 |
| 14158_17  | Annexin V                    | Annexin A5                                                                | P08758 | ANXA5     | chr4:121696995  | Inverse variance weighted | 2  | 0.123  | 0.107 | 2.520E-01 | 0.948 | cis | Severe COVID-19 |
| 16914_104 | sCD14                        | Monocyte differentiation antigen CD14, soluble                            | P08571 | CD14      | chr5:140633700  | Inverse variance weighted | 4  | -0.145 | 0.127 | 2.527E-01 | 0.948 | cis | Severe COVID-19 |
| 16900_29  | MDGA1                        | MAM domain-containing glycosylphosphatidylinositol anchor protein 1       | Q8NFP4 | MDGA1     | chr6:37699306   | Inverse variance weighted | 8  | -0.030 | 0.026 | 2.529E-01 | 0.948 | cis | Severe COVID-19 |
| 6626_81   | CHSTC                        | Carbohydrate sulfotransferase 12                                          | Q9NRB3 | CHST12    | chr7:2403588    | Inverse variance weighted | 2  | -0.093 | 0.081 | 2.544E-01 | 0.948 | cis | Severe COVID-19 |
| 15584_9   | FHR2                         | Complement factor H-related protein 2                                     | P36980 | CFHR2     | chr1:196943738  | Inverse variance weighted | 4  | 0.049  | 0.043 | 2.547E-01 | 0.948 | cis | Severe COVID-19 |
| 11543_84  | LIMA1                        | LIM domain and actin-binding protein 1                                    | Q9UHB6 | LIMA1     | chr12:50283520  | Wald ratio                | 1  | 0.267  | 0.235 | 2.552E-01 | 0.948 | cis | Severe COVID-19 |
| 13988_67  | NMRL1                        | Nmra-like family domain-containing protein 1                              | Q9HBL8 | NMRL1     | chr16:4495763   | Inverse variance weighted | 11 | -0.045 | 0.039 | 2.554E-01 | 0.948 | cis | Severe COVID-19 |
| 19606_28  | ihh                          | Indian hedgehog protein                                                   | Q14623 | IHH       | chr2:219060921  | Inverse variance weighted | 3  | -0.228 | 0.201 | 2.561E-01 | 0.948 | cis | Severe COVID-19 |
| 3617_80   | HGFA                         | Hepatocyte growth factor activator                                        | Q04756 | HGFAC     | chr4:3441968    | Inverse variance weighted | 11 | -0.035 | 0.031 | 2.571E-01 | 0.948 | cis | Severe COVID-19 |
| 9790_28   | BR serine/threonine kinase 2 | Serine/threonine-protein kinase BRSK2                                     | Q8IWK3 | BRSK2     | chr11:1389899   | Inverse variance weighted | 2  | -0.104 | 0.092 | 2.577E-01 | 0.948 | cis | Severe COVID-19 |
| 17320_19  | ADPPT                        | L-aminoadipate-semialdehyde dehydrogenase-phosphopantetheinyl transferase | Q9NRN7 | AASDHPPPT | chr11:106075501 | Wald ratio                | 1  | -0.392 | 0.347 | 2.579E-01 | 0.948 | cis | Severe COVID-19 |
| 16818_200 | CDCP1                        | CUB domain-containing protein 1                                           | Q9HSV8 | CDCP1     | chr3:45146422   | Inverse variance weighted | 3  | -0.116 | 0.103 | 2.598E-01 | 0.948 | cis | Severe COVID-19 |
| 3807_1    | FGF23                        | Fibroblast growth factor 23                                               | Q9GZV9 | FGF23     | chr12:4379712   | Wald ratio                | 1  | -0.328 | 0.292 | 2.606E-01 | 0.948 | cis | Severe COVID-19 |
| 19561_216 | PLXD1                        | Plexin-D1                                                                 | Q9Y407 | PLXND1    | chr3:129606676  | Inverse variance weighted | 4  | 0.086  | 0.076 | 2.620E-01 | 0.948 | cis | Severe COVID-19 |
| 16753_46  | C06A2                        | Collagen alpha-2(VI) chain                                                | P12110 | COL6A2    | chr21:46098112  | Inverse variance weighted | 4  | -0.098 | 0.088 | 2.641E-01 | 0.948 | cis | Severe COVID-19 |
| 4407_10   | MSP                          | Hepatocyte growth factor-like protein                                     | P26927 | MST1      | chr3:49689501   | Inverse variance weighted | 4  | 0.020  | 0.018 | 2.649E-01 | 0.948 | cis | Severe COVID-19 |
| 17329_2   | BDH2                         | 3-hydroxybutyrate dehydrogenase type 2                                    | Q9BU17 | BDH2      | chr4:103099870  | Inverse variance weighted | 2  | 0.100  | 0.090 | 2.654E-01 | 0.948 | cis | Severe COVID-19 |
| 13405_61  | ISK2                         | Serine protease inhibitor Kazal-type 2                                    | P20155 | SPINK2    | chr4:56821742   | Inverse variance weighted | 5  | -0.046 | 0.042 | 2.657E-01 | 0.948 | cis | Severe COVID-19 |
| 13044_5   | TS101                        | Tumor susceptibility gene 101 protein                                     | Q99816 | TSG101    | chr11:18526951  | Inverse variance weighted | 2  | -0.281 | 0.253 | 2.658E-01 | 0.948 | cis | Severe COVID-19 |
| 10512_13  | IL3RB:ECD                    | Cytokine receptor common subunit beta:Extracellular domain                | P32927 | CSF2RB    | chr22:36913628  | Inverse variance weighted | 7  | -0.028 | 0.025 | 2.669E-01 | 0.948 | cis | Severe COVID-19 |
| 4978_54   | DBNL                         | Drebrin-like protein                                                      | Q9JUJ6 | DBNL      | chr7:44044640   | Wald ratio                | 1  | 0.264  | 0.238 | 2.672E-01 | 0.948 | cis | Severe COVID-19 |

|           |                           |                                                                                             |        |         |                 |                           |    |        |       |           |       |     |                 |
|-----------|---------------------------|---------------------------------------------------------------------------------------------|--------|---------|-----------------|---------------------------|----|--------|-------|-----------|-------|-----|-----------------|
| 17357_33  | SPCS                      | O-phosphoseryl-tRNA(Sec) selenium transferase                                               | Q9HD40 | SEPSECS | chr4:25160550   | Wald ratio                | 1  | -0.237 | 0.214 | 2.680E-01 | 0.948 | cis | Severe COVID-19 |
| 10781_19  | CLCAG                     | C-type lectin domain family 4 member G                                                      | Q6UXB4 | CLECAG  | chr19:7733906   | Wald ratio                | 1  | 0.542  | 0.490 | 2.690E-01 | 0.948 | cis | Severe COVID-19 |
| 17408_2   | PMM1                      | Phosphomannomutase 1                                                                        | Q92871 | PMM1    | chr22:41589871  | Wald ratio                | 1  | 0.320  | 0.290 | 2.692E-01 | 0.948 | cis | Severe COVID-19 |
| 2837_3    | Met                       | Hepatocyte growth factor receptor                                                           | P08581 | MET     | chr7:116672196  | Inverse variance weighted | 4  | 0.101  | 0.091 | 2.693E-01 | 0.948 | cis | Severe COVID-19 |
| 9294_45   | MFAF2                     | Microfibrillar-associated protein 2                                                         | P55001 | MFAF2   | chr1:16980632   | Inverse variance weighted | 2  | 0.269  | 0.244 | 2.704E-01 | 0.948 | cis | Severe COVID-19 |
| 15610_72  | LAP                       | Cytosol aminopeptidase                                                                      | P28838 | LAP3    | chr4:17577198   | Wald ratio                | 1  | 0.333  | 0.303 | 2.705E-01 | 0.948 | cis | Severe COVID-19 |
| 6060_2    | PIP                       | Prolactin-inducible protein                                                                 | P12273 | PIP     | chr7:143132077  | Inverse variance weighted | 5  | -0.063 | 0.057 | 2.712E-01 | 0.948 | cis | Severe COVID-19 |
| 5676_54   | ASIP                      | Agouti-signaling protein                                                                    | P42127 | ASIP    | chr20:34194569  | Wald ratio                | 1  | 0.045  | 0.041 | 2.716E-01 | 0.948 | cis | Severe COVID-19 |
| 4874_3    | Angiogenin                | Angiogenin                                                                                  | P03950 | ANG     | chr14:20684177  | Inverse variance weighted | 5  | 0.069  | 0.063 | 2.723E-01 | 0.948 | cis | Severe COVID-19 |
| 4992_49   | GRN                       | Granulins                                                                                   | P28799 | GRN     | chr17:44345246  | Inverse variance weighted | 3  | -0.124 | 0.113 | 2.727E-01 | 0.948 | cis | Severe COVID-19 |
| 9870_17   | SYWC                      | Tryptophan--tRNA ligase, cytoplasmic                                                        | P23381 | WARS1   | chr14:100376805 | Inverse variance weighted | 2  | -0.084 | 0.076 | 2.731E-01 | 0.948 | cis | Severe COVID-19 |
| 8345_27   | GPX7                      | Glutathione peroxidase 7                                                                    | Q96SL4 | GPX7    | chr1:52602371   | Inverse variance weighted | 7  | 0.036  | 0.033 | 2.739E-01 | 0.948 | cis | Severe COVID-19 |
| 9384_17   | Cathelicidin peptide      | Cathelicidin antimicrobial peptide                                                          | P49913 | CAMP    | chr3:48223347   | Wald ratio                | 1  | 0.229  | 0.209 | 2.742E-01 | 0.948 | cis | Severe COVID-19 |
| 17383_4   | STAR5                     | StAR-related lipid transfer protein 5                                                       | Q9NSV2 | STAR5   | chr15:81324183  | Inverse variance weighted | 6  | -0.141 | 0.129 | 2.748E-01 | 0.948 | cis | Severe COVID-19 |
| 3043_49   | ON                        | SPARC                                                                                       | P09486 | SPARC   | chr5:151686975  | Wald ratio                | 1  | 0.316  | 0.290 | 2.754E-01 | 0.948 | cis | Severe COVID-19 |
| 18188_12  | GATM                      | Glycine amidinotransferase, mitochondrial                                                   | P50440 | GATM    | chr15:45402327  | Wald ratio                | 1  | -0.096 | 0.088 | 2.755E-01 | 0.948 | cis | Severe COVID-19 |
| 12382_2   | DDX58                     | Probable ATP-dependent RNA helicase DDX58                                                   | O95786 | DDX58   | chr9:32526208   | Inverse variance weighted | 2  | 0.110  | 0.101 | 2.757E-01 | 0.948 | cis | Severe COVID-19 |
| 17396_23  | ADH1A                     | Alcohol dehydrogenase 1A                                                                    | P07327 | ADH1A   | chr4:99291003   | Wald ratio                | 1  | -0.155 | 0.142 | 2.760E-01 | 0.948 | cis | Severe COVID-19 |
| 6086_15   | CRDL2                     | Chordin-like protein 2                                                                      | Q6WN34 | CHRD12  | chr11:74731426  | Inverse variance weighted | 5  | 0.062  | 0.057 | 2.766E-01 | 0.948 | cis | Severe COVID-19 |
| 3216_2    | PIGR                      | Polymeric immunoglobulin receptor                                                           | P01833 | PIGR    | chr1:206946466  | Wald ratio                | 1  | 0.244  | 0.224 | 2.767E-01 | 0.948 | cis | Severe COVID-19 |
| 5092_51   | JAG1:ECD                  | Protein jagged-1:Extracellular domain                                                       | P78504 | JAG1    | chr20:10673999  | Inverse variance weighted | 2  | -0.270 | 0.248 | 2.774E-01 | 0.948 | cis | Severe COVID-19 |
| 16620_26  | LY75                      | Lymphocyte antigen 75                                                                       | O60449 | LY75    | chr2:159904756  | Inverse variance weighted | 7  | -0.038 | 0.035 | 2.787E-01 | 0.948 | cis | Severe COVID-19 |
| 9297_12   | B3GN8                     | UDP-GlcNAc:betaGal beta-1,3-N-acetylglucosaminyltransferase 8                               | Q7Z7M8 | B3GN8   | chr19:41428730  | Inverse variance weighted | 6  | -0.033 | 0.030 | 2.793E-01 | 0.948 | cis | Severe COVID-19 |
| 6415_90   | CPN2                      | Carboxypeptidase N subunit 2                                                                | P22792 | CPN2    | chr3:194351328  | Inverse variance weighted | 6  | 0.062  | 0.058 | 2.802E-01 | 0.948 | cis | Severe COVID-19 |
| 18295_102 | GRHPR                     | Glyoxylate reductase/hydroxypyruvate reductase                                              | Q9UBQ7 | GRHPR   | chr9:37422666   | Inverse variance weighted | 3  | -0.058 | 0.054 | 2.806E-01 | 0.948 | cis | Severe COVID-19 |
| 8245_27   | siCAM-5                   | Intercellular adhesion molecule 5                                                           | Q9UMF0 | ICAM5   | chr9:10289952   | Inverse variance weighted | 3  | 0.180  | 0.167 | 2.806E-01 | 0.948 | cis | Severe COVID-19 |
| 17224_12  | MIME                      | Mimecan                                                                                     | P20774 | OGN     | chr9:92404696   | Inverse variance weighted | 6  | 0.084  | 0.078 | 2.807E-01 | 0.948 | cis | Severe COVID-19 |
| 13133_73  | LTBP4                     | Latent-transforming growth factor beta-binding protein 4                                    | Q8N251 | LTBP4   | chr19:40592883  | Inverse variance weighted | 2  | -0.275 | 0.255 | 2.809E-01 | 0.948 | cis | Severe COVID-19 |
| 5621_64   | THSD1                     | Thrombospondin type-1 domain-containing protein 1                                           | Q9NS62 | THSD1   | chr13:52416373  | Inverse variance weighted | 4  | 0.070  | 0.065 | 2.809E-01 | 0.948 | cis | Severe COVID-19 |
| 3280_49   | Aggrecan                  | Aggrecan core protein                                                                       | P16112 | ACAN    | chr15:88803436  | Inverse variance weighted | 2  | -0.144 | 0.134 | 2.810E-01 | 0.948 | cis | Severe COVID-19 |
| 5349_69   | DLL1                      | Delta-like protein 1                                                                        | O00548 | DLL1    | chr6:170306565  | Inverse variance weighted | 2  | 0.137  | 0.127 | 2.819E-01 | 0.948 | cis | Severe COVID-19 |
| 4435_66   | ENPP7                     | Ectonucleotide pyrophosphatase/phosphodiesterase family member 7                            | Q6UWV6 | ENPP7   | chr17:79730943  | Inverse variance weighted | 9  | 0.042  | 0.039 | 2.826E-01 | 0.948 | cis | Severe COVID-19 |
| 8893_29   | PARP:region 1             | Poly [ADP-ribose] polymerase 1:region 1                                                     | P09874 | PARP1   | chr1:226408154  | Wald ratio                | 1  | 0.320  | 0.298 | 2.829E-01 | 0.948 | cis | Severe COVID-19 |
| 12498_12  | TX1B3                     | Tax1-binding protein 3                                                                      | O14907 | TAX1B3  | chr17:3668679   | Wald ratio                | 1  | 0.179  | 0.167 | 2.830E-01 | 0.948 | cis | Severe COVID-19 |
| 2966_65   | SCGF-beta                 | Stem cell growth factor-beta                                                                | Q9Y240 | CLEC11A | chr19:50723364  | Wald ratio                | 1  | 0.401  | 0.374 | 2.837E-01 | 0.948 | cis | Severe COVID-19 |
| 11302_237 | TENR                      | Tenascin-R                                                                                  | Q92752 | TNR     | chr1:175743616  | Wald ratio                | 1  | 0.125  | 0.116 | 2.838E-01 | 0.948 | cis | Severe COVID-19 |
| 14618_26  | ECOP                      | Vesicular, overexpressed in cancer, prosurvival protein 1                                   | Q96AW1 | VOPP1   | chr7:55572988   | Inverse variance weighted | 2  | -0.141 | 0.131 | 2.846E-01 | 0.948 | cis | Severe COVID-19 |
| 6416_8    | GKN2                      | Gastrokein-2                                                                                | Q86XP6 | GKN2    | chr2:68952893   | Inverse variance weighted | 4  | 0.050  | 0.047 | 2.852E-01 | 0.948 | cis | Severe COVID-19 |
| 11278_4   | COL11A2                   | Collagen alpha-2(XI) chain                                                                  | P13942 | COL11A2 | chr3:33192499   | Inverse variance weighted | 4  | 0.072  | 0.068 | 2.854E-01 | 0.948 | cis | Severe COVID-19 |
| 5400_52   | sLeptin R                 | Leptin receptor, soluble                                                                    | P48357 | LEPR    | chr1:65420652   | Inverse variance weighted | 10 | 0.031  | 0.029 | 2.855E-01 | 0.948 | cis | Severe COVID-19 |
| 18401_18  | ALKB3                     | Alpha-ketoglutarate-dependent dioxygenase alkB homolog 3                                    | Q96Q83 | ALKBH3  | chr11:43880811  | Inverse variance weighted | 3  | -0.076 | 0.072 | 2.870E-01 | 0.948 | cis | Severe COVID-19 |
| 5963_9    | Dermokine                 | Dermokine                                                                                   | Q6E0U4 | DMKN    | chr19:35513658  | Wald ratio                | 1  | -0.363 | 0.341 | 2.873E-01 | 0.948 | cis | Severe COVID-19 |
| 7140_1    | ELA2A                     | Chymotrypsin-like elastase family member 2A                                                 | P08217 | CELA2A  | chr1:15456728   | Wald ratio                | 1  | 0.166  | 0.156 | 2.874E-01 | 0.948 | cis | Severe COVID-19 |
| 8275_31   | PEAR1:ECD                 | Platelet endothelial aggregation receptor 1:Extracellular domain                            | Q5VY43 | PEAR1   | chr11:156893698 | Inverse variance weighted | 4  | -0.076 | 0.071 | 2.880E-01 | 0.948 | cis | Severe COVID-19 |
| 3607_71   | DKK3                      | Dickkopf-related protein 3                                                                  | Q9UBP4 | DKK3    | chr1:12009769   | Inverse variance weighted | 4  | -0.064 | 0.060 | 2.882E-01 | 0.948 | cis | Severe COVID-19 |
| 5658_64   | coagulation factor XIII B | Coagulation factor XIII B chain                                                             | P05160 | F13B    | chr1:197067260  | Wald ratio                | 1  | -0.157 | 0.148 | 2.889E-01 | 0.948 | cis | Severe COVID-19 |
| 4968_50   | CAPG                      | Macrophage-capping protein                                                                  | P40121 | CAPG    | chr2:85418432   | Inverse variance weighted | 4  | 0.067  | 0.063 | 2.893E-01 | 0.948 | cis | Severe COVID-19 |
| 19376_74  | NNMT                      | Nicotinamide N-methyltransferase                                                            | P40261 | NNMT    | chr11:114257787 | Wald ratio                | 1  | 0.262  | 0.247 | 2.896E-01 | 0.948 | cis | Severe COVID-19 |
| 3605_77   | MASP3:Light               | Mannan-binding lectin serine protease 1:Mannan-binding lectin serine protease 1 light chain | P48740 | MASP1   | chr3:187291980  | Wald ratio                | 1  | 0.200  | 0.189 | 2.897E-01 | 0.948 | cis | Severe COVID-19 |
| 5491_12   | Testican-2                | Testican-2                                                                                  | Q92563 | SPOCK2  | chr10:72089032  | Wald ratio                | 1  | -0.081 | 0.077 | 2.933E-01 | 0.956 | cis | Severe COVID-19 |
| 5090_49   | ILT-2                     | Leukocyte immunoglobulin-like receptor subfamily B member 1                                 | Q8NHL6 | LILRB1  | chr19:54617158  | Inverse variance weighted | 6  | 0.070  | 0.066 | 2.934E-01 | 0.956 | cis | Severe COVID-19 |
| 5121_3    | SEMA6B                    | Semaphorin-6B                                                                               | Q9H3T3 | SEMA6B  | chr19:4581776   | Inverse variance weighted | 2  | 0.237  | 0.227 | 2.949E-01 | 0.958 | cis | Severe COVID-19 |
| 12396_19  | HIBCH                     | 3-hydroxyisobutyryl-CoA hydrolase, mitochondrial                                            | Q6NVY1 | HIBCH   | chr2:190344193  | Inverse variance weighted | 5  | 0.043  | 0.042 | 3.000E-01 | 0.958 | cis | Severe COVID-19 |
| 5202_4    | PPID                      | Peptidyl-prolyl cis-trans isomerase D                                                       | Q08752 | PPID    | chr4:158723396  | Inverse variance weighted | 2  | -0.060 | 0.058 | 3.007E-01 | 0.958 | cis | Severe COVID-19 |
| 13578_98  | ABLM3                     | Actin-binding LIM protein 3                                                                 | O94929 | ABLM3   | chr5:149141483  | Wald ratio                | 1  | -0.149 | 0.144 | 3.010E-01 | 0.958 | cis | Severe COVID-19 |
| 6558_5    | COL10                     | Collectin-10                                                                                | Q9Y6Z7 | COLEC10 | chr8:118995452  | Wald ratio                | 1  | 0.260  | 0.252 | 3.011E-01 | 0.958 | cis | Severe COVID-19 |
| 9233_71   | TFPI -2                   | Tissue factor pathway inhibitor 2                                                           | P48307 | TFPI2   | chr7:93890753   | Wald ratio                | 1  | -0.324 | 0.314 | 3.019E-01 | 0.958 | cis | Severe COVID-19 |
| 8376_25   | LSHB                      | Lutropin subunit beta                                                                       | P01229 | LHB     | chr19:49017091  | Inverse variance weighted | 4  | 0.077  | 0.074 | 3.023E-01 | 0.958 | cis | Severe COVID-19 |
| 13632_10  | Zyxin                     | Zyxin                                                                                       | O15942 | ZYX     | chr7:143381295  | Wald ratio                | 1  | -0.415 | 0.402 | 3.024E-01 | 0.958 | cis | Severe COVID-19 |
| 16300_4   | TREM2                     | Triggering receptor expressed on myeloid cells 2                                            | Q9N2C2 | TREM2   | chr6:41163186   | Inverse variance weighted | 7  | 0.042  | 0.041 | 3.046E-01 | 0.958 | cis | Severe COVID-19 |
| 9126_171  | NTSD3                     | 5'-nucleotidase domain-containing protein 3                                                 | Q86UY8 | NTSDC3  | chr12:103841234 | Inverse variance weighted | 2  | 0.072  | 0.071 | 3.053E-01 | 0.958 | cis | Severe COVID-19 |
| 18321_38  | MTDC                      | Bifunctional methylenetetrahydrofolate dehydrogenase/cyclohydrolase, mitochondrial          | P13995 | MTHFD2  | chr2:74186172   | Inverse variance weighted | 2  | 0.117  | 0.114 | 3.055E-01 | 0.958 | cis | Severe COVID-19 |
| 3212_30   | ASAH2                     | Neutral ceramidase                                                                          | Q9NR71 | ASAH2   | chr10:50279720  | Inverse variance weighted | 6  | -0.036 | 0.036 | 3.061E-01 | 0.958 | cis | Severe COVID-19 |
| 2890_59   | CCL28                     | C-C motif chemokine 28                                                                      | Q9NRJ3 | CCL28   | chr5:43412391   | Wald ratio                | 1  | -0.396 | 0.387 | 3.064E-01 | 0.958 | cis | Severe COVID-19 |
| 3651_50   | VEGF sR2                  | Vascular endothelial growth factor receptor 2                                               | P35968 | KDR     | chr4:55125595   | Inverse variance weighted | 3  | -0.040 | 0.039 | 3.072E-01 | 0.958 | cis | Severe COVID-19 |
| 4546_27   | EMR2                      | Adhesion G protein-coupled receptor E2                                                      | Q9UHX3 | ADGRE2  | chr19:14778560  | Inverse variance weighted | 5  | 0.053  | 0.052 | 3.080E-01 | 0.958 | cis | Severe COVID-19 |
| 6899_37   | PHS2                      | Pterin-4-alpha-carbinolamine dehydratase 2                                                  | Q9H0N5 | PCB02   | chr5:134905120  | Wald ratio                | 1  | 0.549  | 0.538 | 3.081E-01 | 0.958 | cis | Severe COVID-19 |
| 4240_31   | M2-PK                     | Pyruvate kinase PKM                                                                         | P14618 | PKM     | chr5:72231819   | Wald ratio                | 1  | 0.212  | 0.208 | 3.083E-01 | 0.958 | cis | Severe COVID-19 |
| 3290_50   | CD109                     | CD109 antigen                                                                               | Q6YHX3 | CD109   | chr6:73695785   | Inverse variance weighted | 7  | 0.036  | 0.035 | 3.091E-01 | 0.958 | cis | Severe COVID-19 |
| 3391_10   | PK3CG                     | Phosphatidylinositol 4,5-bisphosphate 3-kinase catalytic subunit gamma isoform              | P48736 | PIK3CG  | chr7:106865278  | Wald ratio                | 1  | -0.293 | 0.289 | 3.094E-01 | 0.958 | cis | Severe COVID-19 |
| 19277_4   | KAT                       | Thiosulfate sulfurtransferase/rhodanese-like domain-containing protein 1                    | Q9NFU3 | TSTD1   | chr1:161038977  | Inverse variance weighted | 2  | 0.098  | 0.096 | 3.097E-01 | 0.958 | cis | Severe COVID-19 |
| 19560_23  | PLXA4                     | Plexin-A4                                                                                   | Q9HC42 | PLXNA4  | chr7:132648688  | Wald ratio                | 1  | -0.190 | 0.187 | 3.097E-01 | 0.958 | cis | Severe COVID-19 |
| 11347_9   | Transaldolase             | Transaldolase                                                                               | P37837 | TALD01  | chr11:747415    | Inverse variance weighted | 2  | -0.143 | 0.141 | 3.099E-01 | 0.958 | cis | Severe COVID-19 |
| 9557_5    | MAN51                     | MAN5C domain-containing protein 1                                                           | Q9HBJ5 | MAN5C1  | chr12:12350242  | Inverse variance weighted | 3  | 0.081  | 0.079 | 3.104E-01 | 0.958 | cis | Severe COVID-19 |
| 2201_17   | Endostatin                | Endostatin                                                                                  | P39060 | COL18A1 | chr21:45405165  | Inverse variance weighted | 4  | -0.089 | 0.088 | 3.106E-01 | 0.958 | cis | Severe COVID-19 |
| 11356_19  | DGC14                     | Protein DGC14                                                                               | Q96D08 | ESS2    | chr22:19144684  | Wald ratio                | 1  | 0.144  | 0.142 | 3.107E-01 | 0.958 | cis | Severe COVID-19 |
| 13132_14  | SEM5A                     | Semaphorin-5A                                                                               | Q13591 | SEMA5A  | chr5:9546075    | Inverse variance weighted | 10 | -0.019 | 0.019 | 3.108E-01 | 0.958 | cis | Severe COVID-19 |
| 4126_22   | BPI                       | Bactericidal permeability-increasing protein                                                | P17213 | BPI     | chr20:38304150  | Inverse variance weighted | 9  | 0.026  | 0.025 | 3.110E-01 | 0.958 | cis | Severe COVID-19 |

|           |                              |                                                                              |        |          |                 |                           |    |        |       |           |       |     |                 |
|-----------|------------------------------|------------------------------------------------------------------------------|--------|----------|-----------------|---------------------------|----|--------|-------|-----------|-------|-----|-----------------|
| 9468_8    | Lectin, mannose-binding 2    | Vesicular integral-membrane protein VIP36                                    | Q12907 | LMAN2    | chr5:177351840  | Wald ratio                | 1  | 0.247  | 0.244 | 3.114E-01 | 0.958 | cis | Severe COVID-19 |
| 8877_22   | F176C:ECD                    | Protein eva-1 homolog C:Extracellular domain                                 | S58658 | EVA1C    | chr21:32412006  | Wald ratio                | 1  | -0.243 | 0.241 | 3.117E-01 | 0.958 | cis | Severe COVID-19 |
| 9841_197  | Multifunctional protein ADE2 | Multifunctional protein ADE2                                                 | P22234 | PAIC5    | chr4:56435741   | Wald ratio                | 1  | 0.178  | 0.176 | 3.120E-01 | 0.958 | cis | Severe COVID-19 |
| 6715_63   | PPBN                         | Alkaline phosphatase, placental-like                                         | P10696 | ALPG     | chr2:232406844  | Inverse variance weighted | 3  | 0.157  | 0.156 | 3.121E-01 | 0.958 | cis | Severe COVID-19 |
| 13488_3   | ARFP1                        | Arfaptin-1                                                                   | P53367 | ARFP1    | chr4:152779937  | Inverse variance weighted | 2  | 0.091  | 0.090 | 3.129E-01 | 0.958 | cis | Severe COVID-19 |
| 6544_33   | NELL1                        | Protein kinase C-binding protein NELL1                                       | Q92832 | NELL1    | chr11:20669551  | Inverse variance weighted | 8  | -0.038 | 0.037 | 3.132E-01 | 0.958 | cis | Severe COVID-19 |
| 6574_11   | FAM3                         | Fas apoptotic inhibitory molecule 3                                          | O60667 | FCMR     | chr1:206923247  | Inverse variance weighted | 2  | -0.220 | 0.218 | 3.134E-01 | 0.958 | cis | Severe COVID-19 |
| 9172_69   | MMP-8                        | Neutrophil collagenase                                                       | P22894 | MMP8     | chr11:102727050 | Wald ratio                | 1  | 0.218  | 0.217 | 3.139E-01 | 0.958 | cis | Severe COVID-19 |
| 3810_50   | FGR                          | Tyrosine-protein kinase Fgr                                                  | P09769 | FGR      | chr1:27635185   | Inverse variance weighted | 2  | 0.135  | 0.134 | 3.144E-01 | 0.958 | cis | Severe COVID-19 |
| 17724_3   | WWOX                         | WW domain-containing oxidoreductase                                          | Q9NZC7 | WWOX     | chr16:78099400  | Wald ratio                | 1  | 0.203  | 0.202 | 3.153E-01 | 0.959 | cis | Severe COVID-19 |
| 12820_1   | GRAP                         | GRB2-related adapter protein                                                 | Q13588 | GRAP     | chr17:19047011  | Wald ratio                | 1  | -0.470 | 0.471 | 3.181E-01 | 0.962 | cis | Severe COVID-19 |
| 13545_97  | EIF1A                        | Probable RNA-binding protein EIF1AD                                          | Q8N9N8 | EIF1AD   | chr11:66002176  | Inverse variance weighted | 3  | 0.193  | 0.193 | 3.181E-01 | 0.962 | cis | Severe COVID-19 |
| 4771_10   | ASM3A                        | Acid sphingomyelinase-like phosphodiesterase 3a                              | Q92484 | SMPDL3A  | chr6:122789049  | Inverse variance weighted | 3  | 0.065  | 0.065 | 3.186E-01 | 0.962 | cis | Severe COVID-19 |
| 9565_6    | PAWR                         | PRKC apoptosis WT1 regulator protein                                         | Q96120 | PAWR     | chr12:79690964  | Wald ratio                | 1  | 0.332  | 0.333 | 3.187E-01 | 0.962 | cis | Severe COVID-19 |
| 7994_41   | ERO1B                        | ERO1-like protein beta                                                       | Q86Y98 | ERO1B    | chr1:236282019  | Inverse variance weighted | 2  | -0.082 | 0.082 | 3.199E-01 | 0.963 | cis | Severe COVID-19 |
| 10391_1   | ANGL3                        | Angiopoietin-related protein 3                                               | Q9Y5C1 | ANGPTL3  | chr1:62597520   | Inverse variance weighted | 7  | -0.050 | 0.050 | 3.201E-01 | 0.963 | cis | Severe COVID-19 |
| 3314_74   | GFRA-1                       | GNDF family receptor alpha-1                                                 | P56159 | GFRA1    | chr10:116276803 | Wald ratio                | 1  | 0.082  | 0.083 | 3.216E-01 | 0.964 | cis | Severe COVID-19 |
| 7173_141  | T132C:ECD                    | Transmembrane protein 132C:Extracellular domain                              | Q8N3T6 | TMEM132C | chr12:128267170 | Inverse variance weighted | 5  | 0.047  | 0.047 | 3.216E-01 | 0.964 | cis | Severe COVID-19 |
| 13947_371 | NUD12                        | Peroxisomal NADH pyrophosphatase NUDT12                                      | Q98QG2 | NUDT12   | chr5:103562790  | Inverse variance weighted | 4  | 0.053  | 0.054 | 3.227E-01 | 0.966 | cis | Severe COVID-19 |
| 2665_26   | BCMA                         | Tumor necrosis factor receptor superfamily member 17                         | Q02223 | TNFRSF17 | chr16:11965210  | Wald ratio                | 1  | -0.112 | 0.114 | 3.248E-01 | 0.966 | cis | Severe COVID-19 |
| 3066_12   | Galectin-3                   | Galectin-3                                                                   | P17931 | LGALS3   | chr14:55124110  | Inverse variance weighted | 4  | -0.044 | 0.045 | 3.249E-01 | 0.966 | cis | Severe COVID-19 |
| 19334_62  | TXD12                        | Thioredoxin domain-containing protein 12                                     | O95881 | TXND12   | chr1:52055191   | Wald ratio                | 1  | 0.175  | 0.178 | 3.249E-01 | 0.966 | cis | Severe COVID-19 |
| 2475_1    | SCF sR                       | Mast/stem cell growth factor receptor Kit                                    | P10721 | KIT      | chr4:54657267   | Wald ratio                | 1  | -0.294 | 0.299 | 3.250E-01 | 0.966 | cis | Severe COVID-19 |
| 7244_16   | TM149                        | IGF-like family receptor 1                                                   | Q9H665 | IGFLR1   | chr19:35742453  | Inverse variance weighted | 4  | -0.030 | 0.031 | 3.264E-01 | 0.966 | cis | Severe COVID-19 |
| 6525_17   | DUSP13                       | Dual specificity protein phosphatase 13 isoform A                            | Q68B11 | DUSP13   | chr10:75109221  | Inverse variance weighted | 2  | 0.058  | 0.059 | 3.266E-01 | 0.966 | cis | Severe COVID-19 |
| 11616_9   | HSF1                         | Heat shock factor protein 1                                                  | Q00613 | HSF1     | chr8:144291591  | Wald ratio                | 1  | 0.329  | 0.336 | 3.268E-01 | 0.966 | cis | Severe COVID-19 |
| 17783_9   | MMAB                         | Cob(II)yrinic acid a,c-diamide adenosyltransferase, mitochondrial            | Q96EY8 | MMAB     | chr12:109573580 | Inverse variance weighted | 6  | -0.052 | 0.053 | 3.281E-01 | 0.968 | cis | Severe COVID-19 |
| 15515_2   | SAA                          | Serum amyloid A-1 protein                                                    | P0D1I8 | SAA1     | chr11:18266260  | Inverse variance weighted | 4  | -0.120 | 0.123 | 3.292E-01 | 0.970 | cis | Severe COVID-19 |
| 3079_62   | TIG2                         | Retinoic acid receptor responder protein 2                                   | Q99969 | RARRES2  | chr7:150341662  | Inverse variance weighted | 2  | 0.079  | 0.081 | 3.298E-01 | 0.970 | cis | Severe COVID-19 |
| 3296_92   | CNTN2                        | Contactin-2                                                                  | Q02246 | CNTN2    | chr1:205042937  | Inverse variance weighted | 9  | 0.042  | 0.043 | 3.307E-01 | 0.971 | cis | Severe COVID-19 |
| 5618_50   | FAM3B                        | Protein FAM3B                                                                | P58499 | FAM3B    | chr21:41304212  | Wald ratio                | 1  | 0.194  | 0.200 | 3.314E-01 | 0.971 | cis | Severe COVID-19 |
| 2985_35   | Gro-a                        | Growth-regulated alpha protein                                               | P09341 | CXCL1    | chr4:73869393   | Inverse variance weighted | 8  | -0.045 | 0.046 | 3.324E-01 | 0.972 | cis | Severe COVID-19 |
| 15522_2   | GAPR1                        | Golgi-associated plant pathogenesis-related protein 1                        | Q9H4G4 | GLUPR2   | chr9:36136536   | Inverse variance weighted | 2  | 0.062  | 0.064 | 3.336E-01 | 0.973 | cis | Severe COVID-19 |
| 17814_8   | BPNT1                        | 3'(2'),5'-bisphosphate nucleotidase 1                                        | O95861 | BPNT1    | chr1:220090462  | Wald ratio                | 1  | 0.264  | 0.274 | 3.343E-01 | 0.973 | cis | Severe COVID-19 |
| 10445_20  | ApoM                         | Apolipoprotein M                                                             | O95445 | APOM     | chr6:31652416   | Inverse variance weighted | 2  | 0.077  | 0.079 | 3.350E-01 | 0.973 | cis | Severe COVID-19 |
| 9265_10   | GLUP1                        | Glioma pathogenesis-related protein 1                                        | P48060 | GLUPR1   | chr12:75480753  | Wald ratio                | 1  | -0.162 | 0.169 | 3.354E-01 | 0.973 | cis | Severe COVID-19 |
| 16060_99  | NID2                         | Nidogen-2                                                                    | Q14112 | NID2     | chr14:52069059  | Inverse variance weighted | 6  | 0.037  | 0.039 | 3.358E-01 | 0.973 | cis | Severe COVID-19 |
| 19289_29  | DCUP                         | Uroporphyrinogen decarboxylase                                               | P06132 | UROD     | chr1:45010950   | Inverse variance weighted | 3  | 0.057  | 0.059 | 3.366E-01 | 0.973 | cis | Severe COVID-19 |
| 6414_8    | OAF                          | Out at first protein homolog                                                 | Q86U11 | OAF      | chr11:120211032 | Inverse variance weighted | 5  | -0.039 | 0.041 | 3.374E-01 | 0.973 | cis | Severe COVID-19 |
| 14271_23  | RAB6B                        | Ras-related protein Rab-6B                                                   | Q9NRW1 | RAB6B    | chr3:133895882  | Wald ratio                | 1  | -0.072 | 0.075 | 3.381E-01 | 0.973 | cis | Severe COVID-19 |
| 2851_63   | C5a                          | C5a anaphylatoxin                                                            | P01031 | C5       | chr9:121075195  | Inverse variance weighted | 2  | -0.194 | 0.203 | 3.389E-01 | 0.973 | cis | Severe COVID-19 |
| 19504_22  | KTHY                         | Thymidylate kinase                                                           | P23919 | DTYMK    | chr2:241686944  | Inverse variance weighted | 3  | 0.247  | 0.258 | 3.391E-01 | 0.973 | cis | Severe COVID-19 |
| 10534_40  | PARP-BRCT domain             | Poly [ADP-ribose] polymerase 1:BRCA1 C-terminus domain                       | P09874 | PARP1    | chr1:226408154  | Wald ratio                | 1  | -0.311 | 0.326 | 3.398E-01 | 0.973 | cis | Severe COVID-19 |
| 15427_35  | LOXL3                        | Lysyl oxidase homolog 3                                                      | P58215 | LOXL3    | chr2:74555690   | Wald ratio                | 1  | -0.167 | 0.175 | 3.402E-01 | 0.973 | cis | Severe COVID-19 |
| 4141_79   | IP-10                        | C-X-C motif chemokine 10                                                     | P02778 | CXCL10   | chr4:76023497   | Wald ratio                | 1  | -0.296 | 0.311 | 3.412E-01 | 0.973 | cis | Severe COVID-19 |
| 19581_15  | IGFBP-5                      | Insulin-like growth factor-binding protein 5                                 | P24593 | IGFBP5   | chr2:216695549  | Wald ratio                | 1  | 0.274  | 0.289 | 3.436E-01 | 0.973 | cis | Severe COVID-19 |
| 12851_5   | DPOLM                        | DNA-directed DNA/RNA polymerase mu                                           | Q9NP87 | POLM     | chr7:44082530   | Inverse variance weighted | 3  | 0.097  | 0.103 | 3.469E-01 | 0.973 | cis | Severe COVID-19 |
| 6576_1    | ART4                         | Ecto-ADP-ribosyltransferase 4                                                | Q93070 | ART4     | chr12:14843526  | Inverse variance weighted | 12 | 0.029  | 0.031 | 3.477E-01 | 0.973 | cis | Severe COVID-19 |
| 3060_43   | C9                           | Complement component C9                                                      | P02748 | C9       | chr5:39371324   | Inverse variance weighted | 5  | -0.070 | 0.074 | 3.488E-01 | 0.973 | cis | Severe COVID-19 |
| 15470_11  | Hexosaminidase B             | Beta-hexosaminidase subunit beta                                             | P07686 | HEXB     | chr5:74640023   | Inverse variance weighted | 4  | 0.072  | 0.077 | 3.492E-01 | 0.973 | cis | Severe COVID-19 |
| 17685_9   | Apo A-IV                     | Apolipoprotein A-IV                                                          | P06727 | APOA4    | chr11:116823304 | Wald ratio                | 1  | -0.351 | 0.376 | 3.501E-01 | 0.973 | cis | Severe COVID-19 |
| 10442_1   | TM190                        | Transmembrane protein 190                                                    | Q8WZ59 | TMEM190  | chr19:53376826  | Inverse variance weighted | 9  | -0.025 | 0.027 | 3.514E-01 | 0.973 | cis | Severe COVID-19 |
| 4961_17   | annexin II                   | Annexin A2                                                                   | P07355 | ANXA2    | chr15:60402883  | Inverse variance weighted | 2  | 0.179  | 0.192 | 3.518E-01 | 0.973 | cis | Severe COVID-19 |
| 3332_57   | RGM-C                        | Hemojuvelin                                                                  | Q6ZVN8 | HJV      | chr1:146036746  | Wald ratio                | 1  | -0.199 | 0.214 | 3.527E-01 | 0.973 | cis | Severe COVID-19 |
| 11659_31  | EPN4                         | Clathrin interactor 1                                                        | Q14677 | CUNT1    | chr5:157859145  | Wald ratio                | 1  | 0.346  | 0.373 | 3.528E-01 | 0.973 | cis | Severe COVID-19 |
| 7019_13   | Semaphorin-7A                | Semaphorin-7A                                                                | O75326 | SEMA7A   | chr15:74433958  | Wald ratio                | 1  | 0.171  | 0.184 | 3.528E-01 | 0.973 | cis | Severe COVID-19 |
| 18181_2   | TSSC4                        | Protein TSSC4                                                                | Q9Y5U2 | TSSC4    | chr11:2400488   | Wald ratio                | 1  | -0.478 | 0.515 | 3.532E-01 | 0.973 | cis | Severe COVID-19 |
| 5355_69   | LIGHT                        | Tumor necrosis factor ligand superfamily member 14                           | O43557 | TNFSF14  | chr19:6670588   | Wald ratio                | 1  | -0.139 | 0.150 | 3.534E-01 | 0.973 | cis | Severe COVID-19 |
| 8773_172  | EMIL3:region 1               | EMILIN-3:region 1                                                            | Q9NT22 | EMILIN3  | chr20:41366818  | Inverse variance weighted | 5  | 0.074  | 0.080 | 3.540E-01 | 0.973 | cis | Severe COVID-19 |
| 9348_1    | C1RL1                        | Complement C1r subcomponent-like protein                                     | Q9NZP8 | C1RL     | chr12:7109238   | Wald ratio                | 1  | 0.223  | 0.240 | 3.542E-01 | 0.973 | cis | Severe COVID-19 |
| 13580_2   | Sperm-associated antigen 2   | UDP-N-acetylhexosamine pyrophosphorylase                                     | Q16222 | UAP1     | chr1:162561722  | Wald ratio                | 1  | -0.428 | 0.462 | 3.542E-01 | 0.973 | cis | Severe COVID-19 |
| 16583_8   | APA4                         | Bis(5'-nucleosyl)-tetraphosphatase [asymmetrical]                            | P50583 | NUDT2    | chr9:34329506   | Inverse variance weighted | 7  | 0.069  | 0.075 | 3.544E-01 | 0.973 | cis | Severe COVID-19 |
| 7871_16   | T132A                        | Transmembrane protein 132A                                                   | Q24IP5 | TMEM132A | chr11:60924460  | Inverse variance weighted | 6  | 0.038  | 0.041 | 3.551E-01 | 0.973 | cis | Severe COVID-19 |
| 9482_110  | NUDT9                        | ADP-ribose pyrophosphatase, mitochondrial                                    | Q9BW91 | NUDT9    | chr4:87422573   | Wald ratio                | 1  | -0.293 | 0.317 | 3.553E-01 | 0.973 | cis | Severe COVID-19 |
| 14091_42  | Carbonyl reductase 3         | Carbonyl reductase [NADPH] 3                                                 | O75828 | CBR3     | chr21:36135079  | Inverse variance weighted | 6  | 0.040  | 0.043 | 3.554E-01 | 0.973 | cis | Severe COVID-19 |
| 14066_49  | MAGI2                        | Membrane-associated guanylate kinase, WW and PDZ domain-containing protein 2 | Q86U18 | MAGI2    | chr7:79453667   | Inverse variance weighted | 6  | -0.031 | 0.033 | 3.559E-01 | 0.973 | cis | Severe COVID-19 |
| 14112_40  | RELT                         | Tumor necrosis factor receptor superfamily member 19L                        | Q96924 | RELT     | chr11:73376399  | Wald ratio                | 1  | 0.421  | 0.456 | 3.561E-01 | 0.973 | cis | Severe COVID-19 |
| 10080_9   | E12BA                        | Translation initiation factor eIF-2B subunit alpha                           | Q14232 | EIF2B1   | chr12:123633766 | Wald ratio                | 1  | 0.241  | 0.261 | 3.567E-01 | 0.973 | cis | Severe COVID-19 |
| 8006_12   | DIB12                        | Dnal homolog subfamily B member 12                                           | Q9NXW2 | DNAIB12  | chr10:72355149  | Wald ratio                | 1  | 0.158  | 0.172 | 3.583E-01 | 0.973 | cis | Severe COVID-19 |
| 8014_359  | MANEA                        | Glycoprotein endo-alpha-1,2-mannosidase                                      | Q55R19 | MANEA    | chr6:95577485   | Inverse variance weighted | 6  | 0.020  | 0.022 | 3.587E-01 | 0.973 | cis | Severe COVID-19 |
| 10514_5   | PGD2 synthase                | Prostaglandin-H2 D-isomerase                                                 | P41222 | PTGD5    | chr9:136975092  | Wald ratio                | 1  | 0.277  | 0.302 | 3.590E-01 | 0.973 | cis | Severe COVID-19 |
| 4706_17   | 41                           | Protein 4.1                                                                  | P11171 | EPB41    | chr1:28887091   | Inverse variance weighted | 2  | -0.243 | 0.264 | 3.591E-01 | 0.973 | cis | Severe COVID-19 |
| 14711_27  | Cystatin M                   | Cystatin-M                                                                   | Q15828 | CST6     | chr11:66012008  | Wald ratio                | 1  | 0.176  | 0.192 | 3.603E-01 | 0.973 | cis | Severe COVID-19 |
| 19188_21  | NAP2L                        | nucleosome assembly protein 1-like 4                                         | Q99733 | NAP1L4   | chr11:2992377   | Wald ratio                | 1  | 0.090  | 0.098 | 3.603E-01 | 0.973 | cis | Severe COVID-19 |
| 16318_12  | ALK-1                        | Serine/threonine-protein kinase receptor R3                                  | P37023 | ACVRL1   | chr12:51906908  | Inverse variance weighted | 3  | 0.069  | 0.076 | 3.607E-01 | 0.973 | cis | Severe COVID-19 |
| 10816_150 | PILRA isoform FDF03-M14      | Paired immunoglobulin-like type 2 receptor alpha isoform FDF03-M14           | Q9UK11 | PILRA    | chr7:100367530  | Inverse variance weighted | 3  | 0.221  | 0.243 | 3.621E-01 | 0.973 | cis | Severe COVID-19 |
| 10088_37  | APT                          | Adenine phosphoribosyltransferase                                            | P07741 | APRT     | chr16:88811937  | Inverse variance weighted | 4  | -0.069 | 0.076 | 3.623E-01 | 0.973 | cis | Severe COVID-19 |
| 4990_87   | GP1BA                        | Platelet glycoprotein Ib alpha chain                                         | P07359 | GP1BA    | chr17:4932277   | Inverse variance weighted | 3  | -0.116 | 0.127 | 3.629E-01 | 0.973 | cis | Severe COVID-19 |

|           |                                |                                                                        |        |           |                 |                           |    |        |       |           |       |     |                 |
|-----------|--------------------------------|------------------------------------------------------------------------|--------|-----------|-----------------|---------------------------|----|--------|-------|-----------|-------|-----|-----------------|
| 11656_110 | EVL                            | Ena/VASP-like protein                                                  | Q9UI08 | EVL       | chr14:99971449  | Inverse variance weighted | 3  | 0.170  | 0.187 | 3.638E-01 | 0.973 | cis | Severe COVID-19 |
| 9370_69   | GGH                            | Gamma-glutamyl hydrolase                                               | Q92820 | GGH       | chr8:63039407   | Inverse variance weighted | 5  | -0.035 | 0.039 | 3.642E-01 | 0.973 | cis | Severe COVID-19 |
| 17692_2   | BT3A3                          | Butyrophilin subfamily 3 member A3                                     | O00478 | BTN3A3    | chr6:26440472   | Inverse variance weighted | 9  | -0.042 | 0.046 | 3.654E-01 | 0.973 | cis | Severe COVID-19 |
| 14088_38  | IGFBP-6                        | Insulin-like growth factor-binding protein 6                           | P24592 | IGFBP6    | chr12:53097436  | Wald ratio                | 1  | -0.192 | 0.213 | 3.657E-01 | 0.973 | cis | Severe COVID-19 |
| 5350_14   | GPC6                           | Glypican-6                                                             | Q9Y625 | GPC6      | chr13:93226807  | Wald ratio                | 1  | 0.289  | 0.320 | 3.661E-01 | 0.973 | cis | Severe COVID-19 |
| 8932_1    | ENTP6                          | Ectonucleoside triphosphate diphosphohydrolase 6                       | Q75354 | ENTPD6    | chr20:25195693  | Wald ratio                | 1  | -0.129 | 0.143 | 3.679E-01 | 0.973 | cis | Severe COVID-19 |
| 13423_94  | CJ058                          | Redox-regulatory protein FAM212A                                       | Q9BRX8 | PRXL2A    | chr10:80407829  | Wald ratio                | 1  | 0.275  | 0.306 | 3.680E-01 | 0.973 | cis | Severe COVID-19 |
| 3166_92   | Siglec-3                       | Myeloid cell surface antigen CD33                                      | P20138 | CD33      | chr19:51225064  | Inverse variance weighted | 6  | 0.029  | 0.032 | 3.683E-01 | 0.973 | cis | Severe COVID-19 |
| 14156_33  | 14-3-3 protein beta/alpha      | 14-3-3 protein beta/alpha                                              | P31946 | YWHA8     | chr20:44885702  | Wald ratio                | 1  | 0.242  | 0.269 | 3.685E-01 | 0.973 | cis | Severe COVID-19 |
| 4324_33   | CYT7                           | Cystatin-SA                                                            | P09228 | CST2      | chr20:23826729  | Inverse variance weighted | 5  | -0.095 | 0.105 | 3.690E-01 | 0.973 | cis | Severe COVID-19 |
| 3457_57   | Periostin                      | Periostin                                                              | Q15063 | POSTN     | chr13:37598844  | Inverse variance weighted | 4  | 0.057  | 0.064 | 3.706E-01 | 0.973 | cis | Severe COVID-19 |
| 6379_62   | ATL2                           | ADAMTS-like protein 2                                                  | Q861H1 | ADAMTSL2  | chr9:133532164  | Inverse variance weighted | 2  | -0.133 | 0.149 | 3.710E-01 | 0.973 | cis | Severe COVID-19 |
| 10708_3   | GON2                           | Progonadoliberin-2                                                     | Q43555 | GNRH2     | chr20:3043622   | Wald ratio                | 1  | -0.129 | 0.144 | 3.724E-01 | 0.973 | cis | Severe COVID-19 |
| 3508_78   | MDC                            | C-C motif chemokine 22                                                 | O00625 | CCL22     | chr16:57358783  | Inverse variance weighted | 5  | -0.075 | 0.084 | 3.726E-01 | 0.973 | cis | Severe COVID-19 |
| 7822_11   | HRS12                          | HRAS-like suppressor 2                                                 | Q9NWW9 | PLAAT2    | chr11:63563379  | Wald ratio                | 1  | -0.286 | 0.321 | 3.733E-01 | 0.973 | cis | Severe COVID-19 |
| 4763_31   | Afamin                         | Afamin                                                                 | P43652 | AFM       | chr4:73481745   | Inverse variance weighted | 3  | 0.058  | 0.065 | 3.734E-01 | 0.973 | cis | Severe COVID-19 |
| 5584_21   | Holo-TC II                     | Holo-Transcobalamin-2                                                  | P20062 | TCN2      | chr22:30607003  | Inverse variance weighted | 4  | 0.055  | 0.062 | 3.735E-01 | 0.973 | cis | Severe COVID-19 |
| 19523_215 | PARK7                          | Protein DJ-1                                                           | Q99497 | PARK7     | chr1:7954291    | Wald ratio                | 1  | -0.128 | 0.145 | 3.742E-01 | 0.973 | cis | Severe COVID-19 |
| 12437_18  | ULK3                           | Serine/threonine-protein kinase ULK3                                   | Q6PHR2 | ULK3      | chr15:74843346  | Wald ratio                | 1  | -0.305 | 0.343 | 3.743E-01 | 0.973 | cis | Severe COVID-19 |
| 7947_19   | AP4AT                          | AP-4 complex accessory subunit tepsin                                  | Q96N21 | TEPSIN    | chr17:81239091  | Wald ratio                | 1  | 0.250  | 0.282 | 3.746E-01 | 0.973 | cis | Severe COVID-19 |
| 8097_77   | LIPN                           | Lipase member N                                                        | Q5VKI9 | LIPN      | chr10:88759982  | Inverse variance weighted | 6  | -0.029 | 0.033 | 3.759E-01 | 0.973 | cis | Severe COVID-19 |
| 3389_7    | PCI                            | Plasma serine protease inhibitor                                       | P05154 | SERPINA5  | chr14:94561442  | Inverse variance weighted | 2  | -0.170 | 0.192 | 3.760E-01 | 0.973 | cis | Severe COVID-19 |
| 9793_145  | IGDC4                          | Immunoglobulin superfamily DCC subclass member 4                       | Q8TDY8 | IGDCC4    | chr15:65422947  | Inverse variance weighted | 7  | -0.039 | 0.044 | 3.774E-01 | 0.973 | cis | Severe COVID-19 |
| 5749_53   | COL                            | Colipase                                                               | P04118 | CLPS      | chr6:35797344   | Inverse variance weighted | 10 | -0.036 | 0.041 | 3.776E-01 | 0.973 | cis | Severe COVID-19 |
| 6255_74   | CPXM1                          | Probable carboxypeptidase X1                                           | Q96SM3 | CPXM1     | chr20:2800627   | Inverse variance weighted | 5  | -0.058 | 0.066 | 3.777E-01 | 0.973 | cis | Severe COVID-19 |
| 8885_6    | CA2D3                          | Voltage-dependent calcium channel subunit alpha-2/delta-3              | Q8I258 | CACNA2D3  | chr3:54122547   | Inverse variance weighted | 5  | -0.069 | 0.078 | 3.780E-01 | 0.973 | cis | Severe COVID-19 |
| 2962_50   | PTHrP                          | Parathyroid hormone-related protein                                    | P12272 | PTH1L     | chr12:27972733  | Inverse variance weighted | 3  | 0.099  | 0.112 | 3.782E-01 | 0.973 | cis | Severe COVID-19 |
| 12356_65  | Sorcin                         | Sorcin                                                                 | P30626 | SRI       | chr7:88226993   | Wald ratio                | 1  | 0.114  | 0.130 | 3.793E-01 | 0.973 | cis | Severe COVID-19 |
| 2977_7    | EDAR                           | Tumor necrosis factor receptor superfamily member EDAR                 | Q9UNE0 | EDAR      | chr2:108989372  | Inverse variance weighted | 7  | -0.028 | 0.032 | 3.807E-01 | 0.973 | cis | Severe COVID-19 |
| 5107_7    | Notch 1                        | Neurogenic locus notch homolog protein 1                               | P46531 | NOTCH1    | chr9:136546048  | Inverse variance weighted | 2  | 0.112  | 0.127 | 3.811E-01 | 0.973 | cis | Severe COVID-19 |
| 7948_129  | GLTD2                          | Glycolipid transfer protein domain-containing protein 2                | A6NH11 | GLTPD2    | chr17:4788964   | Inverse variance weighted | 3  | 0.067  | 0.076 | 3.818E-01 | 0.973 | cis | Severe COVID-19 |
| 5598_3    | GREM2                          | Gremilin-2                                                             | Q9H772 | GREM2     | chr1:240612155  | Wald ratio                | 1  | -0.214 | 0.245 | 3.819E-01 | 0.973 | cis | Severe COVID-19 |
| 14131_37  | EFNB2:ECD                      | Ephrin-B2:Extracellular domain                                         | P52799 | EFNB2     | chr13:106535662 | Inverse variance weighted | 2  | 0.230  | 0.263 | 3.819E-01 | 0.973 | cis | Severe COVID-19 |
| 7935_26   | LARGE                          | Glycosyltransferase-like protein LARGE1                                | Q95461 | LARGE1    | chr22:33922841  | Inverse variance weighted | 2  | -0.157 | 0.180 | 3.820E-01 | 0.973 | cis | Severe COVID-19 |
| 3438_10   | FSTL3                          | Follistatin-related protein 3                                          | O95633 | FSTL3     | chr19:676392    | Inverse variance weighted | 2  | 0.165  | 0.189 | 3.821E-01 | 0.973 | cis | Severe COVID-19 |
| 16770_3   | REG1B                          | Lithostathine-1-beta                                                   | P48304 | REG1B     | chr2:79088019   | Inverse variance weighted | 3  | 0.216  | 0.248 | 3.822E-01 | 0.973 | cis | Severe COVID-19 |
| 6039_24   | CRHBP                          | Corticotropin-releasing factor-binding protein                         | P24387 | CRHBP     | chr5:76953045   | Inverse variance weighted | 6  | 0.048  | 0.055 | 3.835E-01 | 0.973 | cis | Severe COVID-19 |
| 6471_53   | FHR4                           | Complement factor H-related protein 4                                  | Q92496 | CFHR4     | chr1:196888014  | Inverse variance weighted | 10 | 0.053  | 0.061 | 3.836E-01 | 0.973 | cis | Severe COVID-19 |
| 17325_10  | KGUA                           | Guanylate kinase                                                       | Q16774 | GUK1      | chr1:228139962  | Inverse variance weighted | 5  | -0.083 | 0.095 | 3.842E-01 | 0.973 | cis | Severe COVID-19 |
| 3448_13   | IR                             | Insulin receptor                                                       | P06213 | INSR      | chr19:7294414   | Wald ratio                | 1  | -0.185 | 0.213 | 3.852E-01 | 0.973 | cis | Severe COVID-19 |
| 10511_10  | Collagen alpha-3(VI):isoform 3 | Collagen alpha-3(VI) chain:isoform 3                                   | P12111 | COL6A3    | chr2:237414328  | Inverse variance weighted | 2  | 0.200  | 0.230 | 3.852E-01 | 0.973 | cis | Severe COVID-19 |
| 13114_50  | Lumican                        | Lumican                                                                | P51884 | LUM       | chr12:91111494  | Inverse variance weighted | 7  | 0.048  | 0.056 | 3.853E-01 | 0.973 | cis | Severe COVID-19 |
| 9092_33   | ANG11:N-term                   | Angiopietin-related protein 1:N-term                                   | O95841 | ANGPTL1   | chr1:178871077  | Wald ratio                | 1  | 0.248  | 0.286 | 3.859E-01 | 0.973 | cis | Severe COVID-19 |
| 13242_134 | SHAN3                          | SH3 and multiple ankyrin repeat domains protein 3                      | Q9BY80 | SHANK3    | chr22:50674415  | Inverse variance weighted | 5  | -0.037 | 0.042 | 3.866E-01 | 0.973 | cis | Severe COVID-19 |
| 10948_14  | PLD3                           | Phospholipase D3                                                       | Q8IV08 | PLD3      | chr19:40348456  | Wald ratio                | 1  | 0.270  | 0.312 | 3.869E-01 | 0.973 | cis | Severe COVID-19 |
| 7227_75   | COCH                           | Cochlin                                                                | Q43405 | COCH      | chr14:30874514  | Inverse variance weighted | 4  | -0.056 | 0.065 | 3.871E-01 | 0.973 | cis | Severe COVID-19 |
| 18173_11  | ARK73                          | Aflatoxin B1 aldehyde reductase member 3                               | O95154 | AKR7A3    | chr1:19288770   | Inverse variance weighted | 5  | 0.046  | 0.053 | 3.879E-01 | 0.973 | cis | Severe COVID-19 |
| 16851_50  | SCO2                           | Protein SCO2 homolog, mitochondrial                                    | Q43819 | SCO2      | chr22:50526461  | Wald ratio                | 1  | -0.138 | 0.160 | 3.881E-01 | 0.973 | cis | Severe COVID-19 |
| 19223_6   | RAB1A                          | Ras-related protein Rab-1A                                             | P62820 | RAB1A     | chr2:65130331   | Wald ratio                | 1  | -0.231 | 0.268 | 3.886E-01 | 0.973 | cis | Severe COVID-19 |
| 16781_2   | ENASE                          | Cytosolic endo-beta-N-acetylglucosaminidase                            | Q8NF13 | ENGASE    | chr17:79074824  | Inverse variance weighted | 9  | 0.028  | 0.032 | 3.887E-01 | 0.973 | cis | Severe COVID-19 |
| 3305_6    | DL14                           | Delta-like protein 4                                                   | Q9NR61 | DL14      | chr15:40929340  | Wald ratio                | 1  | 0.256  | 0.297 | 3.888E-01 | 0.973 | cis | Severe COVID-19 |
| 8368_102  | tnf sR-II                      | Tumor necrosis factor receptor superfamily member 1B                   | P20333 | TNFRSF1B  | chr1:12166991   | Wald ratio                | 1  | -0.080 | 0.093 | 3.903E-01 | 0.976 | cis | Severe COVID-19 |
| 17515_6   | STCH                           | Heat shock 70 kDa protein 13                                           | P48723 | HSPA13    | chr21:14383484  | Wald ratio                | 1  | 0.132  | 0.154 | 3.912E-01 | 0.977 | cis | Severe COVID-19 |
| 4564_2    | PLXC1                          | Plexin-C1                                                              | O60486 | PLXNC1    | chr12:94148577  | Inverse variance weighted | 11 | 0.018  | 0.021 | 3.938E-01 | 0.981 | cis | Severe COVID-19 |
| 3366_51   | ECM1                           | Extracellular matrix protein 1                                         | Q16610 | ECM1      | chr1:150508062  | Inverse variance weighted | 11 | -0.029 | 0.035 | 3.959E-01 | 0.984 | cis | Severe COVID-19 |
| 12731_12  | PKHA7                          | Pleckstrin homology domain-containing family A member 7                | Q6IQ23 | PLEKHA7   | chr11:17014415  | Inverse variance weighted | 4  | -0.040 | 0.047 | 3.959E-01 | 0.984 | cis | Severe COVID-19 |
| 3580_25   | a1-Antitrypsin                 | Alpha-1-antitrypsin                                                    | P01009 | SERPINA1  | chr14:94390693  | Inverse variance weighted | 7  | 0.023  | 0.028 | 3.975E-01 | 0.985 | cis | Severe COVID-19 |
| 18922_27  | CD68                           | Macrosialin                                                            | P34810 | CD68      | chr17:7579491   | Inverse variance weighted | 2  | -0.166 | 0.196 | 3.975E-01 | 0.985 | cis | Severe COVID-19 |
| 5116_62   | ROBO2                          | Roundabout homolog 2                                                   | Q9HCK4 | ROBO2     | chr3:75906695   | Wald ratio                | 1  | -0.290 | 0.343 | 3.980E-01 | 0.985 | cis | Severe COVID-19 |
| 15513_108 | Prostasin                      | Prostasin                                                              | Q16651 | PRSS8     | chr16:31135727  | Inverse variance weighted | 2  | -0.148 | 0.177 | 4.013E-01 | 0.988 | cis | Severe COVID-19 |
| 5867_60   | ARGI1                          | Arginase-1                                                             | P05089 | ARG1      | chr6:131470832  | Inverse variance weighted | 2  | 0.163  | 0.194 | 4.015E-01 | 0.988 | cis | Severe COVID-19 |
| 3171_57   | amyloid precursor protein      | Amyloid beta A4 protein                                                | P05067 | APP       | chr21:26171128  | Wald ratio                | 1  | 0.170  | 0.203 | 4.022E-01 | 0.988 | cis | Severe COVID-19 |
| 4276_10   | prostatic binding protein      | Phosphatidylethanolamine-binding protein 1                             | P30086 | PEBP1     | chr12:118136124 | Inverse variance weighted | 7  | -0.039 | 0.046 | 4.022E-01 | 0.988 | cis | Severe COVID-19 |
| 13929_27  | OCTC                           | Peroxisomal carnitine O-octanoyltransferase                            | Q9UKG9 | CROT      | chr7:87345664   | Inverse variance weighted | 6  | -0.044 | 0.053 | 4.022E-01 | 0.988 | cis | Severe COVID-19 |
| 10737_96  | Serpin B1                      | Leukocyte elastase inhibitor                                           | P30740 | SERPINB1  | chr6:2841959    | Wald ratio                | 1  | 0.273  | 0.327 | 4.032E-01 | 0.988 | cis | Severe COVID-19 |
| 3054_3    | Haptoglobin, Mixed Type        | Haptoglobin                                                            | P00738 | HP        | chr16:72054505  | Inverse variance weighted | 4  | -0.033 | 0.040 | 4.033E-01 | 0.988 | cis | Severe COVID-19 |
| 11273_176 | GSTT2                          | Glutathione S-transferase theta-2B                                     | POCG30 | GSTT2B    | chr22:23961195  | Inverse variance weighted | 4  | -0.053 | 0.063 | 4.042E-01 | 0.988 | cis | Severe COVID-19 |
| 12801_33  | IRF2                           | Interferon regulatory factor 2                                         | P14316 | IRF2      | chr4:184474558  | Wald ratio                | 1  | -0.244 | 0.293 | 4.051E-01 | 0.988 | cis | Severe COVID-19 |
| 4908_6    | Endoglin                       | Endoglin                                                               | P17813 | ENG       | chr9:127854658  | Inverse variance weighted | 3  | 0.055  | 0.067 | 4.054E-01 | 0.988 | cis | Severe COVID-19 |
| 15472_16  | LRP11                          | Low-density lipoprotein receptor-related protein 11                    | Q86V24 | LRP11     | chr16:149864359 | Inverse variance weighted | 6  | -0.071 | 0.085 | 4.065E-01 | 0.988 | cis | Severe COVID-19 |
| 11145_72  | K154L                          | UPF0606 protein KIAA1549L                                              | Q6ZV16 | KIAA1549L | chr11:33376108  | Inverse variance weighted | 7  | -0.036 | 0.043 | 4.078E-01 | 0.988 | cis | Severe COVID-19 |
| 19117_3   | PP14A                          | Protein phosphatase 1 regulatory subunit 14A                           | Q96A00 | PPP1R14A  | chr19:38256532  | Wald ratio                | 1  | 0.216  | 0.262 | 4.094E-01 | 0.988 | cis | Severe COVID-19 |
| 3235_50   | WFKN2                          | WAP, Kazal, immunoglobulin, Kunitz and NTR domain-containing protein 2 | Q8TEU8 | WFIKN2    | chr17:50834650  | Inverse variance weighted | 7  | 0.033  | 0.040 | 4.100E-01 | 0.988 | cis | Severe COVID-19 |
| 6151_18   | MP2K3                          | Dual specificity mitogen-activated protein kinase kinase 3             | P46734 | MAP2K3    | chr17:21284672  | Wald ratio                | 1  | 0.272  | 0.330 | 4.101E-01 | 0.988 | cis | Severe COVID-19 |
| 18380_78  | Albumin                        | Serum albumin                                                          | P02768 | ALB       | chr4:73397114   | Wald ratio                | 1  | 0.290  | 0.352 | 4.104E-01 | 0.988 | cis | Severe COVID-19 |
| 7916_10   | S100A7                         | Protein S100-A7                                                        | P31151 | S100A7    | chr1:153460651  | Inverse variance weighted | 7  | 0.024  | 0.029 | 4.134E-01 | 0.988 | cis | Severe COVID-19 |
| 17153_46  | KI2L3                          | Killer cell immunoglobulin-like receptor 2DL3                          | P43628 | KIR2DL3   | chr19:54738513  | Inverse variance weighted | 4  | -0.023 | 0.029 | 4.137E-01 | 0.988 | cis | Severe COVID-19 |
| 5430_66   | SHPS1                          | Tyrosine-protein phosphatase non-receptor type substrate 1             | P78324 | SIRPA     | chr20:1894167   | Inverse variance weighted | 9  | 0.024  | 0.030 | 4.140E-01 | 0.988 | cis | Severe COVID-19 |

|           |                               |                                                                                                         |        |          |                 |                           |   |        |       |           |       |     |                 |
|-----------|-------------------------------|---------------------------------------------------------------------------------------------------------|--------|----------|-----------------|---------------------------|---|--------|-------|-----------|-------|-----|-----------------|
| 8225_86   | EPHB2                         | Ephrin type-B receptor 2                                                                                | P29323 | EPHB2    | chr1:22710839   | Inverse variance weighted | 3 | 0.051  | 0.063 | 4.150E-01 | 0.988 | cis | Severe COVID-19 |
| 18386_36  | GLRX1                         | Glutaredoxin-1                                                                                          | P35754 | GLRX     | chr5:95822726   | Wald ratio                | 1 | -0.223 | 0.273 | 4.153E-01 | 0.988 | cis | Severe COVID-19 |
| 8479_4    | MMP-10                        | Stromelysin-2                                                                                           | P09238 | MMP10    | chr11:102780628 | Inverse variance weighted | 6 | -0.059 | 0.073 | 4.163E-01 | 0.988 | cis | Severe COVID-19 |
| 19176_27  | FA49B                         | Protein FAM49B                                                                                          | Q9NUQ9 | CYRIB    | chr8:130017504  | Wald ratio                | 1 | 0.305  | 0.376 | 4.176E-01 | 0.988 | cis | Severe COVID-19 |
| 13473_55  | IP3KA                         | Inositol-trisphosphate 3-kinase A                                                                       | P23677 | ITPKA    | chr15:41493393  | Wald ratio                | 1 | 0.172  | 0.213 | 4.186E-01 | 0.988 | cis | Severe COVID-19 |
| 2819_23   | Cadherin-5                    | Cadherin-5                                                                                              | P33151 | CDH5     | chr16:66366622  | Inverse variance weighted | 2 | 0.086  | 0.107 | 4.200E-01 | 0.988 | cis | Severe COVID-19 |
| 4220_39   | FER                           | Tyrosine-protein kinase Fer                                                                             | P16591 | FER      | chr5:108747841  | Wald ratio                | 1 | -0.197 | 0.245 | 4.208E-01 | 0.988 | cis | Severe COVID-19 |
| 18458_4   | PGES2                         | Prostaglandin E synthase 2                                                                              | Q9H727 | PTGES2   | chr9:128128462  | Wald ratio                | 1 | -0.162 | 0.201 | 4.211E-01 | 0.988 | cis | Severe COVID-19 |
| 19273_3   | Glutathione reductase         | Glutathione reductase, mitochondrial                                                                    | P00390 | GSR      | chr8:30727846   | Inverse variance weighted | 3 | -0.154 | 0.191 | 4.215E-01 | 0.988 | cis | Severe COVID-19 |
| 11142_11  | ANG11.C-term                  | Angiotensin-related protein 11.C-Term, Fibrinogen domain                                                | O95841 | ANGPTL1  | chr1:178871077  | Inverse variance weighted | 4 | 0.039  | 0.048 | 4.216E-01 | 0.988 | cis | Severe COVID-19 |
| 13093_6   | SECTM1                        | Secreted and transmembrane protein 1                                                                    | Q8WVN6 | SECTM1   | chr17:82334074  | Inverse variance weighted | 3 | -0.082 | 0.102 | 4.216E-01 | 0.988 | cis | Severe COVID-19 |
| 3367_8    | FETUB                         | Fetuin-B                                                                                                | Q9UGM5 | FETUB    | chr3:186635969  | Inverse variance weighted | 5 | 0.096  | 0.120 | 4.217E-01 | 0.988 | cis | Severe COVID-19 |
| 10620_21  | PSP-94                        | Beta-microseminoprotein                                                                                 | P08118 | MSMB     | chr10:46048180  | Inverse variance weighted | 3 | -0.019 | 0.024 | 4.223E-01 | 0.988 | cis | Severe COVID-19 |
| 9964_10   | MYZAP                         | Myocardial zonula adherens protein                                                                      | P0CAP1 | MYZAP    | chr15:57591904  | Wald ratio                | 1 | -0.181 | 0.226 | 4.226E-01 | 0.988 | cis | Severe COVID-19 |
| 11187_11  | CL12A                         | C-type lectin domain family 12 member A                                                                 | Q5QG29 | CLEC12A  | chr12:9951316   | Inverse variance weighted | 6 | 0.040  | 0.050 | 4.234E-01 | 0.988 | cis | Severe COVID-19 |
| 15452_5   | 5'-Nucleotidase               | 5'-Nucleotidase                                                                                         | P21589 | NT5E     | chr6:85449584   | Inverse variance weighted | 4 | -0.031 | 0.039 | 4.242E-01 | 0.988 | cis | Severe COVID-19 |
| 15622_13  | OBCAM                         | Opioid-binding protein/cell adhesion molecule                                                           | Q14982 | OPCML    | chr11:133532501 | Wald ratio                | 1 | -0.251 | 0.315 | 4.247E-01 | 0.988 | cis | Severe COVID-19 |
| 2843_13   | SPINT2                        | Kunitz-type protease inhibitor 2                                                                        | O43291 | SPINT2   | chr19:38244035  | Inverse variance weighted | 7 | -0.034 | 0.042 | 4.253E-01 | 0.988 | cis | Severe COVID-19 |
| 5109_24   | Nr-CAM                        | Neuronal cell adhesion molecule                                                                         | Q92823 | NRCAM    | chr7:108456717  | Wald ratio                | 1 | 0.252  | 0.317 | 4.257E-01 | 0.988 | cis | Severe COVID-19 |
| 19377_14  | NOE2                          | Noelin-2                                                                                                | O95897 | OLFM2    | chr19:9936515   | Inverse variance weighted | 6 | -0.036 | 0.045 | 4.258E-01 | 0.988 | cis | Severe COVID-19 |
| 7950_142  | BTNL9                         | Butyrophilin-like protein 9                                                                             | Q6UXG8 | BTNL9    | chr5:181040225  | Wald ratio                | 1 | 0.175  | 0.220 | 4.259E-01 | 0.988 | cis | Severe COVID-19 |
| 18214_2   | GSHO                          | Glutamate-cysteine ligase regulatory subunit                                                            | P48507 | GCLM     | chr1:93909456   | Inverse variance weighted | 2 | 0.134  | 0.168 | 4.259E-01 | 0.988 | cis | Severe COVID-19 |
| 4801_13   | PERL                          | Lactoperoxidase                                                                                         | P22079 | LPO      | chr17:58218548  | Inverse variance weighted | 2 | -0.054 | 0.067 | 4.260E-01 | 0.988 | cis | Severe COVID-19 |
| 5256_86   | PDESA                         | cGMP-specific 3',5'-cyclic phosphodiesterase                                                            | O76074 | PDESA    | chr4:119628804  | Inverse variance weighted | 3 | -0.126 | 0.159 | 4.278E-01 | 0.988 | cis | Severe COVID-19 |
| 3796_79   | ANG14                         | Angiotensin-related protein 4                                                                           | Q9BY76 | ANGPTL4  | chr19:8363289   | Wald ratio                | 1 | 0.128  | 0.162 | 4.283E-01 | 0.988 | cis | Severe COVID-19 |
| 2778_10   | IL-22                         | Interleukin-22                                                                                          | Q9G2X6 | IL22     | chr12:68253604  | Wald ratio                | 1 | -0.199 | 0.252 | 4.304E-01 | 0.988 | cis | Severe COVID-19 |
| 19153_53  | MPPD2                         | Metallophosphoesterase MPPE2                                                                            | Q15777 | MPPE2    | chr11:30586872  | Inverse variance weighted | 2 | 0.138  | 0.175 | 4.305E-01 | 0.988 | cis | Severe COVID-19 |
| 4455_89   | MFGM                          | Lactadherin                                                                                             | Q08431 | MFGF8    | chr15:88913468  | Inverse variance weighted | 4 | -0.060 | 0.076 | 4.308E-01 | 0.988 | cis | Severe COVID-19 |
| 7648_9    | MYPC1                         | Myosin-binding protein C, slow-type                                                                     | Q00872 | MYBPC1   | chr12:101568353 | Wald ratio                | 1 | 0.144  | 0.183 | 4.308E-01 | 0.988 | cis | Severe COVID-19 |
| 19635_69  | FGL2                          | Fibroleukin                                                                                             | Q14314 | FGL2     | chr7:77199848   | Wald ratio                | 1 | 0.207  | 0.263 | 4.310E-01 | 0.988 | cis | Severe COVID-19 |
| 6986_17   | HS3SB                         | Heparan sulfate glucosamine 3-O-sulfotransferase 3B1                                                    | Q9Y662 | HS3ST3B1 | chr17:14301081  | Wald ratio                | 1 | 0.250  | 0.317 | 4.313E-01 | 0.988 | cis | Severe COVID-19 |
| 6904_14   | LRRT2                         | Leucine-rich repeat transmembrane neuronal protein 2                                                    | O43300 | LRRTM2   | chr5:138875368  | Wald ratio                | 1 | 0.144  | 0.184 | 4.316E-01 | 0.988 | cis | Severe COVID-19 |
| 11178_21  | SVEP1:EGF-like domains 4-6    | Sushi, von Willebrand factor type A, EGF and pentraxin domain-containing protein 1:EGF-like domains 4-6 | Q4LDE5 | SVEP1    | chr9:110579880  | Inverse variance weighted | 4 | 0.079  | 0.100 | 4.318E-01 | 0.988 | cis | Severe COVID-19 |
| 4991_12   | GPC5                          | Glypican-5                                                                                              | P78333 | GPC5     | chr13:91398621  | Inverse variance weighted | 6 | -0.029 | 0.037 | 4.319E-01 | 0.988 | cis | Severe COVID-19 |
| 6521_35   | NPTX2                         | Neuronal pentraxin-2                                                                                    | P47972 | NPTX2    | chr7:98617285   | Inverse variance weighted | 2 | 0.121  | 0.154 | 4.324E-01 | 0.988 | cis | Severe COVID-19 |
| 13944_3   | SULT 1A3                      | Sulfotransferase 1A3                                                                                    | P0DMM9 | SULT1A3  | chr16:30199228  | Inverse variance weighted | 4 | 0.102  | 0.130 | 4.338E-01 | 0.988 | cis | Severe COVID-19 |
| 9884_8    | PPIL1                         | Peptidyl-prolyl cis-trans isomerase-like 1                                                              | Q9Y3C6 | PPIL1    | chr6:36874803   | Inverse variance weighted | 4 | 0.025  | 0.032 | 4.338E-01 | 0.988 | cis | Severe COVID-19 |
| 11510_31  | Apo L1                        | Apolipoprotein L1                                                                                       | O14791 | APOL1    | chr22:36253071  | Inverse variance weighted | 5 | -0.035 | 0.045 | 4.341E-01 | 0.988 | cis | Severe COVID-19 |
| 16916_19  | SLIK6                         | SLIT and NTRK-like protein 6                                                                            | Q9HSY7 | SLITRK6  | chr13:85806683  | Inverse variance weighted | 4 | -0.116 | 0.148 | 4.342E-01 | 0.988 | cis | Severe COVID-19 |
| 10833_64  | HHIP                          | Hedgehog-interacting protein                                                                            | Q96QV1 | HHIP     | chr4:144646156  | Inverse variance weighted | 2 | -0.078 | 0.100 | 4.343E-01 | 0.988 | cis | Severe COVID-19 |
| 5508_62   | Cathepsin D                   | Cathepsin D                                                                                             | P07339 | CTSD     | chr11:1764573   | Inverse variance weighted | 5 | 0.045  | 0.058 | 4.380E-01 | 0.988 | cis | Severe COVID-19 |
| 2831_29   | Kallikrein 11                 | Kallikrein-11                                                                                           | Q9UBX7 | KLK11    | chr19:51028039  | Inverse variance weighted | 7 | 0.065  | 0.084 | 4.386E-01 | 0.988 | cis | Severe COVID-19 |
| 6580_29   | Pregnancy zone protein        | Pregnancy zone protein                                                                                  | P20742 | PZP      | chr12:9208395   | Inverse variance weighted | 2 | -0.097 | 0.126 | 4.419E-01 | 0.988 | cis | Severe COVID-19 |
| 13463_1   | PXDN                          | Peroxidasin homolog                                                                                     | Q92626 | PXDN     | chr2:1744852    | Inverse variance weighted | 4 | 0.098  | 0.127 | 4.421E-01 | 0.988 | cis | Severe COVID-19 |
| 12008_3   | CD7                           | T-cell antigen CD7                                                                                      | P09564 | CD7      | chr17:82317608  | Inverse variance weighted | 4 | 0.122  | 0.158 | 4.422E-01 | 0.988 | cis | Severe COVID-19 |
| 5069_9    | DAF                           | Complement decay-accelerating factor                                                                    | P08174 | CD55     | chr1:207321519  | Inverse variance weighted | 4 | -0.079 | 0.103 | 4.428E-01 | 0.988 | cis | Severe COVID-19 |
| 3175_51   | AT5I3                         | A disintegrin and metalloproteinase with thrombospondin motifs 13                                       | Q761X8 | ADAMTS13 | chr9:133414358  | Inverse variance weighted | 7 | 0.025  | 0.032 | 4.433E-01 | 0.988 | cis | Severe COVID-19 |
| 11360_39  | RRM1                          | Ribonucleoside-diphosphate reductase large subunit                                                      | P23921 | RRM1     | chr11:4094707   | Wald ratio                | 1 | 0.219  | 0.286 | 4.434E-01 | 0.988 | cis | Severe COVID-19 |
| 13094_75  | RSPO3                         | R-spondin-3                                                                                             | Q9BXK4 | RSPO3    | chr6:127118671  | Wald ratio                | 1 | 0.190  | 0.248 | 4.445E-01 | 0.988 | cis | Severe COVID-19 |
| 3029_52   | DC-SIGN                       | CD209 antigen                                                                                           | Q9NNX6 | CD209    | chr19:7747564   | Inverse variance weighted | 4 | 0.074  | 0.096 | 4.445E-01 | 0.988 | cis | Severe COVID-19 |
| 4866_59   | TrkB                          | BDNF/NT-3 growth factors receptor                                                                       | Q16620 | NTRK2    | chr9:84668375   | Wald ratio                | 1 | -0.186 | 0.243 | 4.446E-01 | 0.988 | cis | Severe COVID-19 |
| 12475_48  | CLIC5                         | Chloride intracellular channel protein 5                                                                | Q9NZA1 | CLIC5    | chr6:46080348   | Inverse variance weighted | 5 | 0.049  | 0.064 | 4.467E-01 | 0.988 | cis | Severe COVID-19 |
| 4499_21   | PDGF-AA                       | Platelet-derived growth factor subunit A                                                                | P04085 | PDGFA    | chr7:520296     | Inverse variance weighted | 3 | -0.134 | 0.177 | 4.473E-01 | 0.988 | cis | Severe COVID-19 |
| 3331_8    | RGMB                          | RGM domain family member B                                                                              | Q6NWX0 | RGMB     | chr5:98768650   | Inverse variance weighted | 3 | -0.093 | 0.122 | 4.483E-01 | 0.988 | cis | Severe COVID-19 |
| 4314_12   | XTP3A                         | dCTP pyrophosphatase 1                                                                                  | Q9H773 | DCTPP1   | chr16:30430030  | Wald ratio                | 1 | 0.142  | 0.187 | 4.486E-01 | 0.988 | cis | Severe COVID-19 |
| 17766_5   | NCF-1                         | Neutrophil cytosol factor 1                                                                             | P14598 | NCF1     | chr7:74774011   | Inverse variance weighted | 6 | 0.060  | 0.079 | 4.487E-01 | 0.988 | cis | Severe COVID-19 |
| 17403_14  | acyl-Coenzyme A dehydrogenase | Short/branched chain specific acyl-CoA dehydrogenase, mitochondrial                                     | P45954 | ACADSB   | chr10:123008979 | Inverse variance weighted | 2 | 0.105  | 0.139 | 4.490E-01 | 0.988 | cis | Severe COVID-19 |
| 3415_61   | BSP                           | Bone sialoprotein 2                                                                                     | P21815 | IBSP     | chr4:87799554   | Wald ratio                | 1 | -0.110 | 0.146 | 4.499E-01 | 0.988 | cis | Severe COVID-19 |
| 8346_9    | DPP2                          | Dipeptidyl peptidase 2                                                                                  | Q9UHL4 | DPP7     | chr9:137118309  | Inverse variance weighted | 7 | -0.046 | 0.061 | 4.501E-01 | 0.988 | cis | Severe COVID-19 |
| 7875_86   | PLEK                          | Pleckstrin                                                                                              | P08567 | PLEK     | chr2:68365282   | Inverse variance weighted | 2 | -0.094 | 0.124 | 4.502E-01 | 0.988 | cis | Severe COVID-19 |
| 18310_26  | SELW                          | Selenoprotein W                                                                                         | P63302 | SELENOW  | chr19:47778677  | Inverse variance weighted | 3 | 0.079  | 0.104 | 4.503E-01 | 0.988 | cis | Severe COVID-19 |
| 3041_55   | MRC2                          | C-type mannose receptor 2                                                                               | Q9UBG0 | MRC2     | chr17:62627670  | Inverse variance weighted | 5 | -0.058 | 0.076 | 4.512E-01 | 0.988 | cis | Severe COVID-19 |
| 5644_60   | RNAS4                         | Ribonuclease 4                                                                                          | P34096 | RNASE4   | chr14:20684560  | Inverse variance weighted | 5 | 0.054  | 0.072 | 4.528E-01 | 0.988 | cis | Severe COVID-19 |
| 11606_22  | DNJB6                         | DnaJ homolog subfamily B member 6                                                                       | O75190 | DNAJB6   | chr7:157335381  | Wald ratio                | 1 | 0.218  | 0.291 | 4.535E-01 | 0.988 | cis | Severe COVID-19 |
| 18819_21  | PPIC                          | Peptidyl-prolyl cis-trans isomerase C                                                                   | P45877 | PPIC     | chr5:123036725  | Inverse variance weighted | 3 | 0.033  | 0.044 | 4.535E-01 | 0.988 | cis | Severe COVID-19 |
| 12686_15  | THTM                          | 3-mercaptopyruvate sulfurtransferase                                                                    | P25325 | MPST     | chr22:37019635  | Inverse variance weighted | 2 | -0.162 | 0.217 | 4.556E-01 | 0.988 | cis | Severe COVID-19 |
| 5701_81   | Tetranectin                   | Tetranectin                                                                                             | P05452 | CLEC3B   | chr3:45001548   | Inverse variance weighted | 2 | -0.089 | 0.119 | 4.559E-01 | 0.988 | cis | Severe COVID-19 |
| 7049_2    | ADAM 23                       | Disintegrin and metalloproteinase domain-containing protein 23                                          | O75077 | ADAM23   | chr2:206443532  | Inverse variance weighted | 6 | 0.018  | 0.025 | 4.559E-01 | 0.988 | cis | Severe COVID-19 |
| 5034_79   | Trypsin 2                     | Trypsin-2                                                                                               | P07478 | PRSS2    | chr7:142760398  | Inverse variance weighted | 4 | -0.099 | 0.133 | 4.559E-01 | 0.988 | cis | Severe COVID-19 |
| 18408_26  | ARF4                          | ADP-ribosylation factor 4                                                                               | P18085 | ARF4     | chr3:57598220   | Wald ratio                | 1 | 0.153  | 0.205 | 4.560E-01 | 0.988 | cis | Severe COVID-19 |
| 19496_1   | NPL                           | N-acetylneuraminidase lyase                                                                             | Q9BXD5 | NPL      | chr1:182789293  | Inverse variance weighted | 3 | -0.067 | 0.090 | 4.561E-01 | 0.988 | cis | Severe COVID-19 |
| 13697_51  | GPD4                          | Glycerol-3-phosphate dehydrogenase [NAD(+)], cytoplasmic                                                | P21695 | GPD1     | chr12:50103982  | Wald ratio                | 1 | 0.139  | 0.187 | 4.567E-01 | 0.988 | cis | Severe COVID-19 |
| 3481_87   | XPNPEP1                       | Xaa-Pro aminopeptidase 1                                                                                | Q9NQW7 | XPNPEP1  | chr10:109923553 | Wald ratio                | 1 | 0.174  | 0.234 | 4.569E-01 | 0.988 | cis | Severe COVID-19 |
| 2999_6    | LSAMP                         | Limbic system-associated membrane protein                                                               | Q13449 | LSAMP    | chr3:117139389  | Inverse variance weighted | 4 | 0.069  | 0.094 | 4.578E-01 | 0.988 | cis | Severe COVID-19 |
| 6572_10   | LRRT4:ECD                     | Leucine-rich repeat transmembrane neuronal protein 4:Isoform 2, Extracellular domain                    | Q86VH4 | LRRTM4   | chr2:77593319   | Wald ratio                | 1 | -0.233 | 0.315 | 4.590E-01 | 0.988 | cis | Severe COVID-19 |
| 7957_2    | SCG3                          | Secretogranin-3                                                                                         | Q8WXD2 | SCG3     | chr15:51681492  | Inverse variance weighted | 7 | -0.028 | 0.038 | 4.591E-01 | 0.988 | cis | Severe COVID-19 |
| 15615_8   | LIRB3                         | Leukocyte immunoglobulin-like receptor subfamily B member 3                                             | O75022 | LILRB3   | chr19:54223506  | Inverse variance weighted | 5 | -0.048 | 0.064 | 4.593E-01 | 0.988 | cis | Severe COVID-19 |
| 19615_213 | 5NT3                          | Cytosolic 5'-nucleotidase 3A                                                                            | Q9H0P0 | NT5C3A   | chr7:33062796   | Wald ratio                | 1 | 0.143  | 0.193 | 4.597E-01 | 0.988 | cis | Severe COVID-19 |

|           |                                     |                                                                      |        |          |                 |                           |    |        |       |           |       |     |                 |
|-----------|-------------------------------------|----------------------------------------------------------------------|--------|----------|-----------------|---------------------------|----|--------|-------|-----------|-------|-----|-----------------|
| 14048_7   | IL-1 R AcP                          | Interleukin-1 Receptor accessory protein                             | Q9NPH3 | IL1RAP   | chr3:190514051  | Inverse variance weighted | 6  | -0.017 | 0.023 | 4.608E-01 | 0.988 | cis | Severe COVID-19 |
| 4964_67   | ARTS1                               | Endoplasmic reticulum aminopeptidase 1                               | Q9N208 | ERAP1    | chr5:96808100   | Inverse variance weighted | 5  | -0.023 | 0.031 | 4.609E-01 | 0.988 | cis | Severe COVID-19 |
| 9015_1    | PRG3                                | Proteoglycan 3                                                       | Q9Y2Y8 | PRG3     | chr11:57381150  | Wald ratio                | 1  | -0.293 | 0.397 | 4.609E-01 | 0.988 | cis | Severe COVID-19 |
| 15604_18  | JNK2                                | Mitogen-activated protein kinase 9                                   | P45984 | MAPK9    | chr5:180292099  | Inverse variance weighted | 2  | -0.105 | 0.143 | 4.625E-01 | 0.988 | cis | Severe COVID-19 |
| 17350_13  | CHM2B                               | Charged multivesicular body protein 2b                               | Q9UQN3 | CHMP2B   | chr3:87227271   | Inverse variance weighted | 3  | -0.056 | 0.076 | 4.625E-01 | 0.988 | cis | Severe COVID-19 |
| 17787_1   | Enoyl-CoA hydratase                 | Enoyl-CoA hydratase, mitochondrial                                   | P30084 | ECHS1    | chr10:133373354 | Wald ratio                | 1  | -0.207 | 0.282 | 4.626E-01 | 0.988 | cis | Severe COVID-19 |
| 3232_28   | TrATPase                            | Tartrate-resistant acid phosphatase type 5                           | P13686 | ACP5     | chr9:11579993   | Inverse variance weighted | 4  | -0.056 | 0.077 | 4.634E-01 | 0.988 | cis | Severe COVID-19 |
| 3890_8    | LDH-H 1                             | L-lactate dehydrogenase B chain                                      | P07195 | LDHB     | chr12:21757857  | Wald ratio                | 1  | 0.312  | 0.427 | 4.651E-01 | 0.988 | cis | Severe COVID-19 |
| 8028_22   | SPINK5                              | Serine protease inhibitor Kazal-type 5                               | Q9N038 | SPINK5   | chr5:148025683  | Wald ratio                | 1  | 0.081  | 0.112 | 4.677E-01 | 0.988 | cis | Severe COVID-19 |
| 5509_7    | EGF-ECD                             | Epidermal growth factor:Extracellular domain                         | P01133 | EGF      | chr4:109912883  | Inverse variance weighted | 4  | 0.107  | 0.147 | 4.681E-01 | 0.988 | cis | Severe COVID-19 |
| 2855_49   | ERK-1                               | Mitogen-activated protein kinase 3                                   | P27361 | MAPK3    | chr16:30123506  | Inverse variance weighted | 3  | -0.062 | 0.086 | 4.691E-01 | 0.988 | cis | Severe COVID-19 |
| 5112_73   | OX2G                                | OX-2 membrane glycoprotein                                           | P41217 | CD200    | chr3:112332347  | Wald ratio                | 1  | -0.137 | 0.190 | 4.693E-01 | 0.988 | cis | Severe COVID-19 |
| 10908_2   | GLT13                               | Polypeptide N-acetylgalactosaminyltransferase 13                     | Q8IU08 | GALNT13  | chr2:153871922  | Wald ratio                | 1  | -0.245 | 0.340 | 4.697E-01 | 0.988 | cis | Severe COVID-19 |
| 11237_49  | PCOC1                               | Procollagen C-endopeptidase enhancer 1                               | Q15113 | PCOLCE   | chr7:100602363  | Inverse variance weighted | 2  | 0.268  | 0.372 | 4.708E-01 | 0.988 | cis | Severe COVID-19 |
| 8229_1    | GXL1                                | Glucoside xylosyltransferase 1                                       | Q4G148 | GXYLT1   | chr12:42144874  | Inverse variance weighted | 5  | 0.061  | 0.085 | 4.711E-01 | 0.988 | cis | Severe COVID-19 |
| 8476_11   | CgA                                 | Chromogranin-A                                                       | P10645 | CHGA     | chr14:92923150  | Inverse variance weighted | 4  | 0.055  | 0.076 | 4.718E-01 | 0.988 | cis | Severe COVID-19 |
| 13388_57  | NEC1                                | Neuroendocrine convertase 1                                          | P29120 | PCSK1    | chr5:96434143   | Inverse variance weighted | 7  | -0.036 | 0.051 | 4.722E-01 | 0.988 | cis | Severe COVID-19 |
| 9212_22   | CATF                                | Cathepsin F                                                          | Q9UBX1 | CTSF     | chr11:66568879  | Inverse variance weighted | 2  | -0.057 | 0.079 | 4.734E-01 | 0.988 | cis | Severe COVID-19 |
| 12459_13  | PKHA1                               | Pleckstrin homology domain-containing family A member 1              | Q9HB21 | PLEKHA1  | chr10:122374696 | Inverse variance weighted | 4  | 0.035  | 0.048 | 4.734E-01 | 0.988 | cis | Severe COVID-19 |
| 6049_64   | PTPRS                               | Receptor-type tyrosine-protein phosphatase 5                         | Q13332 | PTPRS    | chr19:5340812   | Wald ratio                | 1  | -0.123 | 0.172 | 4.737E-01 | 0.988 | cis | Severe COVID-19 |
| 5763_67   | HBD-4                               | Beta-defensin 104                                                    | Q8WTQ1 | DEFB104A | chr8:7836436    | Inverse variance weighted | 3  | 0.191  | 0.266 | 4.738E-01 | 0.988 | cis | Severe COVID-19 |
| 9416_77   | CBPM                                | Carboxypeptidase M                                                   | P14384 | CPM      | chr12:68971570  | Wald ratio                | 1  | 0.111  | 0.156 | 4.745E-01 | 0.988 | cis | Severe COVID-19 |
| 9398_30   | GALP                                | Galanin-like peptide                                                 | Q9UBC7 | GALP     | chr19:56176008  | Wald ratio                | 1  | -0.171 | 0.239 | 4.746E-01 | 0.988 | cis | Severe COVID-19 |
| 15476_6   | REG3G                               | Regenerating islet-derived protein 3-gamma                           | Q6UW15 | REG3G    | chr2:79025686   | Inverse variance weighted | 6  | 0.027  | 0.038 | 4.747E-01 | 0.988 | cis | Severe COVID-19 |
| 9337_43   | TKN1                                | Protachykinin-1                                                      | P20366 | TAC1     | chr7:97732084   | Inverse variance weighted | 3  | 0.054  | 0.075 | 4.754E-01 | 0.988 | cis | Severe COVID-19 |
| 6409_57   | GP116                               | Adhesion G protein-coupled receptor F5                               | Q8IFZ2 | ADGRF5   | chr6:46954943   | Inverse variance weighted | 7  | -0.019 | 0.026 | 4.760E-01 | 0.988 | cis | Severe COVID-19 |
| 4355_13   | DAPK2                               | Death-associated protein kinase 2                                    | Q9UIK4 | DAPK2    | chr15:64072033  | Inverse variance weighted | 3  | 0.040  | 0.057 | 4.762E-01 | 0.988 | cis | Severe COVID-19 |
| 16773_29  | SCUB3                               | Signal peptide, CUB and EGF-like domain-containing protein 3         | Q8IX30 | SCUBE3   | chr6:35213956   | Inverse variance weighted | 3  | 0.063  | 0.088 | 4.770E-01 | 0.988 | cis | Severe COVID-19 |
| 15475_4   | PLTP                                | Phospholipid transfer protein                                        | P55058 | PLTP     | chr20:45912155  | Inverse variance weighted | 9  | -0.035 | 0.049 | 4.771E-01 | 0.988 | cis | Severe COVID-19 |
| 7841_84   | ESAM                                | Endothelial cell-selective adhesion molecule                         | Q96A97 | ESAM     | chr11:124762290 | Inverse variance weighted | 6  | 0.042  | 0.059 | 4.776E-01 | 0.988 | cis | Severe COVID-19 |
| 13126_52  | DSC2                                | Desmocollin-2                                                        | Q02487 | DSC2     | chr18:31102522  | Inverse variance weighted | 4  | -0.064 | 0.090 | 4.777E-01 | 0.988 | cis | Severe COVID-19 |
| 13597_20  | RAB31                               | Ras-related protein Rab-31                                           | Q13636 | RAB31    | chr18:9708275   | Inverse variance weighted | 3  | 0.082  | 0.115 | 4.785E-01 | 0.988 | cis | Severe COVID-19 |
| 3640_14   | RAP                                 | alpha-2-macroglobulin receptor-associated protein                    | P30533 | LRPAP1   | chr4:3532446    | Inverse variance weighted | 4  | 0.056  | 0.080 | 4.793E-01 | 0.988 | cis | Severe COVID-19 |
| 11177_16  | K2C5                                | Keratin, type II cytoskeletal 5                                      | P13647 | KRT5     | chr12:52520530  | Inverse variance weighted | 2  | -0.127 | 0.180 | 4.806E-01 | 0.988 | cis | Severe COVID-19 |
| 15589_1   | Gc-Globulin, Mixed Type             | Vitamin D-binding protein                                            | P02774 | GC       | chr4:71804041   | Inverse variance weighted | 2  | 0.079  | 0.112 | 4.818E-01 | 0.988 | cis | Severe COVID-19 |
| 5102_55   | MICB                                | MHC class I polypeptide-related sequence B                           | Q29980 | MICB     | chr6:3194881    | Inverse variance weighted | 6  | 0.023  | 0.032 | 4.820E-01 | 0.988 | cis | Severe COVID-19 |
| 5012_67   | Myokine, human                      | Adenylate kinase isoenzyme 1                                         | P00568 | AK1      | chr9:127877675  | Wald ratio                | 1  | -0.249 | 0.355 | 4.822E-01 | 0.988 | cis | Severe COVID-19 |
| 7997_118  | DOC2B                               | Double C2-like domain-containing protein beta                        | Q14184 | DOC2B    | chr17:181650    | Wald ratio                | 1  | -0.245 | 0.350 | 4.830E-01 | 0.988 | cis | Severe COVID-19 |
| 11219_95  | FGFP3                               | Fibroblast growth factor-binding protein 3                           | Q8TAT2 | FGFBP3   | chr10:91909486  | Inverse variance weighted | 3  | 0.063  | 0.089 | 4.831E-01 | 0.988 | cis | Severe COVID-19 |
| 17802_4   | SIA5                                | Sialic acid synthase                                                 | Q9NR45 | NANS     | chr9:98056732   | Wald ratio                | 1  | 0.122  | 0.174 | 4.833E-01 | 0.988 | cis | Severe COVID-19 |
| 8303_102  | MYG1                                | UPF0160 protein MYG1, mitochondrial                                  | Q9HB07 | MYG1     | chr12:53296695  | Wald ratio                | 1  | 0.205  | 0.293 | 4.835E-01 | 0.988 | cis | Severe COVID-19 |
| 9288_7    | FKBP7                               | Peptidyl-prolyl cis-trans isomerase FKBP7                            | Q9Y680 | FKBP7    | chr2:178478600  | Inverse variance weighted | 4  | 0.036  | 0.052 | 4.835E-01 | 0.988 | cis | Severe COVID-19 |
| 9449_150  | C4b-binding protein alpha chain     | C4b-binding protein alpha chain                                      | P04003 | C4BPA    | chr1:207104233  | Inverse variance weighted | 6  | -0.066 | 0.095 | 4.837E-01 | 0.988 | cis | Severe COVID-19 |
| 12682_5   | KAT3                                | Kynurenine-oxoglutarate transaminase 3                               | Q6YP21 | KYAT3    | chr1:88992953   | Inverse variance weighted | 7  | -0.032 | 0.045 | 4.848E-01 | 0.988 | cis | Severe COVID-19 |
| 15556_49  | Alpha-amylase 2B                    | Alpha-amylase 2B                                                     | P19961 | AMYL2B   | chr1:103553815  | Inverse variance weighted | 3  | 0.122  | 0.175 | 4.850E-01 | 0.988 | cis | Severe COVID-19 |
| 13068_139 | CCS                                 | Copper chaperone for superoxide dismutase                            | Q14618 | CCS      | chr11:66593153  | Wald ratio                | 1  | 0.086  | 0.123 | 4.850E-01 | 0.988 | cis | Severe COVID-19 |
| 5742_14   | PPA6                                | Lysophosphatidic acid phosphatase type 6                             | Q9NPH0 | ACP6     | chr1:147670524  | Inverse variance weighted | 13 | -0.015 | 0.022 | 4.859E-01 | 0.988 | cis | Severe COVID-19 |
| 2647_66   | Rab GDP dissociation inhibitor beta | Rab GDP dissociation inhibitor beta                                  | P50395 | GDI2     | chr10:5842132   | Wald ratio                | 1  | -0.107 | 0.154 | 4.889E-01 | 0.988 | cis | Severe COVID-19 |
| 2515_14   | GFRa-2                              | gDNF family receptor alpha-2                                         | Q00451 | GFRAL    | chr8:21812357   | Inverse variance weighted | 6  | -0.038 | 0.055 | 4.891E-01 | 0.988 | cis | Severe COVID-19 |
| 18413_24  | ARL4D                               | ADP-ribosylation factor-like protein 4D                              | P49703 | ARL4D    | chr17:43398993  | Wald ratio                | 1  | 0.193  | 0.279 | 4.899E-01 | 0.988 | cis | Severe COVID-19 |
| 2212_69   | IPA                                 | Tissue-type plasminogen activator                                    | P00750 | PLAT     | chr8:42207709   | Inverse variance weighted | 4  | 0.056  | 0.082 | 4.899E-01 | 0.988 | cis | Severe COVID-19 |
| 3825_18   | MK08                                | Mitogen-activated protein kinase 8                                   | P45983 | MAPK8    | chr10:48306639  | Wald ratio                | 1  | 0.185  | 0.269 | 4.908E-01 | 0.988 | cis | Severe COVID-19 |
| 9322_15   | RCN1                                | Reticulocalbin-1                                                     | Q15293 | RCN1     | chr11:32091074  | Wald ratio                | 1  | -0.079 | 0.115 | 4.917E-01 | 0.988 | cis | Severe COVID-19 |
| 5451_1    | ALCAM                               | CD166 antigen                                                        | Q13740 | ALCAM    | chr3:105366909  | Inverse variance weighted | 4  | 0.100  | 0.145 | 4.924E-01 | 0.988 | cis | Severe COVID-19 |
| 12685_57  | HOME2                               | Homer protein homolog 2                                              | Q9NSB8 | HOMER2   | chr15:82986153  | Wald ratio                | 1  | 0.150  | 0.218 | 4.927E-01 | 0.988 | cis | Severe COVID-19 |
| 5656_53   | PP11                                | Poly(U)-specific endoribonuclease                                    | P21128 | ENDOU    | chr12:47725567  | Wald ratio                | 1  | -0.166 | 0.244 | 4.945E-01 | 0.988 | cis | Severe COVID-19 |
| 12571_14  | ARL3                                | ADP-ribosylation factor-like protein 3                               | P36405 | ARL3     | chr10:102714397 | Inverse variance weighted | 2  | -0.068 | 0.100 | 4.950E-01 | 0.988 | cis | Severe COVID-19 |
| 13959_7   | LAP                                 | Cytosol aminopeptidase                                               | P28838 | LAP3     | chr4:17577198   | Wald ratio                | 1  | -0.309 | 0.453 | 4.951E-01 | 0.988 | cis | Severe COVID-19 |
| 12662_82  | ECH1                                | Delta(3,5)-Delta(2,4)-dienoyl-CoA isomerase, mitochondrial           | Q13011 | ECH1     | chr19:38831841  | Inverse variance weighted | 2  | -0.035 | 0.051 | 4.952E-01 | 0.988 | cis | Severe COVID-19 |
| 2617_56   | ERBB3                               | Receptor tyrosine-protein kinase erbB-3                              | P21860 | ERBB3    | chr12:56076799  | Wald ratio                | 1  | 0.091  | 0.134 | 4.955E-01 | 0.988 | cis | Severe COVID-19 |
| 9574_11   | BIN1                                | Myc box-dependent-interacting protein 1                              | Q00499 | BIN1     | chr2:127107288  | Inverse variance weighted | 2  | -0.072 | 0.105 | 4.958E-01 | 0.988 | cis | Severe COVID-19 |
| 3221_54   | SARP-2                              | Secreted frizzled-related protein 1                                  | Q8NA74 | SFRP1    | chr8:41309473   | Inverse variance weighted | 3  | 0.064  | 0.095 | 4.959E-01 | 0.988 | cis | Severe COVID-19 |
| 11708_2   | LCN1                                | Lipocalin-1                                                          | P31025 | LCN1     | chr9:135521438  | Wald ratio                | 1  | -0.150 | 0.222 | 4.987E-01 | 0.988 | cis | Severe COVID-19 |
| 10070_22  | PLCG2                               | 1-phosphatidylinositol 4,5-bisphosphate phosphodiesterase gamma-2    | P16885 | PLCG2    | chr16:81779279  | Inverse variance weighted | 2  | 0.168  | 0.249 | 4.988E-01 | 0.988 | cis | Severe COVID-19 |
| 3340_53   | TSP4                                | Thrombospondin-4                                                     | P35443 | THBS4    | chr5:79991311   | Inverse variance weighted | 3  | -0.049 | 0.073 | 4.993E-01 | 0.988 | cis | Severe COVID-19 |
| 5682_13   | VASN                                | Vasorin                                                              | Q6EMK4 | VASN     | chr16:4371848   | Wald ratio                | 1  | -0.139 | 0.206 | 4.996E-01 | 0.988 | cis | Severe COVID-19 |
| 2615_60   | Ephrin-A5                           | Ephrin-A5                                                            | P52803 | EFNA5    | chr5:107670937  | Inverse variance weighted | 2  | 0.087  | 0.129 | 5.009E-01 | 0.988 | cis | Severe COVID-19 |
| 13123_3   | FLRT3:ECD                           | Leucine-rich repeat transmembrane protein FLRT3:Extracellular domain | Q9NZU0 | FLRT3    | chr20:14337614  | Inverse variance weighted | 6  | -0.017 | 0.026 | 5.012E-01 | 0.988 | cis | Severe COVID-19 |
| 15594_47  | HTRA1                               | Serine protease HTRA1                                                | Q92743 | HTRA1    | chr10:122458551 | Inverse variance weighted | 2  | -0.102 | 0.152 | 5.017E-01 | 0.988 | cis | Severe COVID-19 |
| 3803_10   | CYTID                               | Cystatin-D                                                           | P28325 | CTSD     | chr20:23879748  | Inverse variance weighted | 11 | 0.037  | 0.055 | 5.019E-01 | 0.988 | cis | Severe COVID-19 |
| 7928_183  | TPST1                               | Protein-tyrosine sulfotransferase 1                                  | Q60507 | TPST1    | chr7:66205317   | Inverse variance weighted | 2  | 0.034  | 0.050 | 5.030E-01 | 0.988 | cis | Severe COVID-19 |
| 6557_50   | LRC15                               | Leucine-rich repeat-containing protein 15                            | Q8TF66 | LARC15   | chr3:194369743  | Inverse variance weighted | 4  | 0.054  | 0.082 | 5.061E-01 | 0.988 | cis | Severe COVID-19 |
| 15386_7   | FABPA                               | Fatty acid-binding protein, adipocyte                                | P15090 | FABP4    | chr8:81483236   | Wald ratio                | 1  | 0.124  | 0.187 | 5.066E-01 | 0.988 | cis | Severe COVID-19 |
| 3004_67   | PD-L2                               | Programmed cell death 1 ligand 2                                     | Q9B051 | PDCD1LG2 | chr9:5510531    | Inverse variance weighted | 5  | -0.030 | 0.045 | 5.079E-01 | 0.988 | cis | Severe COVID-19 |
| 3213_65   | Nidogen                             | Nidogen-1                                                            | P14543 | NID1     | chr1:236065109  | Inverse variance weighted | 4  | 0.060  | 0.091 | 5.087E-01 | 0.988 | cis | Severe COVID-19 |
| 9223_11   | ARMET                               | Mesencephalic astrocyte-derived neurotrophic factor                  | P55145 | MANF     | chr3:51385291   | Wald ratio                | 1  | -0.222 | 0.336 | 5.098E-01 | 0.988 | cis | Severe COVID-19 |
| 5713_9    | IFN-lambda 3                        | Interferon lambda-3                                                  | Q8I219 | IFNL3    | chr19:39245250  | Wald ratio                | 1  | 0.210  | 0.319 | 5.107E-01 | 0.988 | cis | Severe COVID-19 |
| 5105_2    | Nogo Receptor                       | Reticulon-4 receptor                                                 | Q9B2R6 | RTNAR    | chr22:20283246  | Inverse variance weighted | 5  | -0.034 | 0.051 | 5.108E-01 | 0.988 | cis | Severe COVID-19 |

|           |                         |                                                                        |        |           |                 |                           |    |        |       |           |       |     |                 |
|-----------|-------------------------|------------------------------------------------------------------------|--------|-----------|-----------------|---------------------------|----|--------|-------|-----------|-------|-----|-----------------|
| 17156_72  | DCAK1                   | Serine/threonine-protein kinase DCLK1                                  | O15075 | DCLK1     | chr13:36131382  | Inverse variance weighted | 3  | 0.061  | 0.093 | 5.108E-01 | 0.988 | cis | Severe COVID-19 |
| 19482_11  | HDHD3                   | Haloacid dehalogenase-like hydrolase domain-containing protein 3       | Q9B8H5 | HDHD3     | chr9:113376986  | Wald ratio                | 1  | 0.053  | 0.081 | 5.114E-01 | 0.988 | cis | Severe COVID-19 |
| 8005_1    | MXRA7                   | Matrix-remodeling-associated protein 7                                 | P84157 | MXRA7     | chr17:76711004  | Inverse variance weighted | 5  | -0.030 | 0.046 | 5.117E-01 | 0.988 | cis | Severe COVID-19 |
| 15614_168 | LRRA2                   | Leukocyte immunoglobulin-like receptor subfamily A member 2            | Q8N149 | LRRA2     | chr19:54572920  | Inverse variance weighted | 4  | -0.033 | 0.051 | 5.119E-01 | 0.988 | cis | Severe COVID-19 |
| 16803_4   | CALB2                   | Calretinin                                                             | P22676 | CALB2     | chr16:71358713  | Inverse variance weighted | 2  | 0.151  | 0.230 | 5.120E-01 | 0.988 | cis | Severe COVID-19 |
| 2950_57   | IGFBP-4                 | Insulin-like growth factor-binding protein 4                           | P22692 | IGFBP4    | chr17:40443450  | Wald ratio                | 1  | -0.178 | 0.272 | 5.125E-01 | 0.988 | cis | Severe COVID-19 |
| 4131_72   | Fibronectin             | Fibronectin                                                            | P02751 | FN1       | chr2:215436073  | Inverse variance weighted | 2  | 0.175  | 0.268 | 5.128E-01 | 0.988 | cis | Severe COVID-19 |
| 17773_26  | SNAG                    | Gamma-soluble NSF attachment protein                                   | Q99747 | NAPG      | chr18:10525905  | Wald ratio                | 1  | -0.167 | 0.255 | 5.129E-01 | 0.988 | cis | Severe COVID-19 |
| 2692_74   | NPS-PLA2                | Phospholipase A2, membrane associated                                  | P14555 | PLA2G2A   | chr1:19980416   | Inverse variance weighted | 6  | -0.022 | 0.033 | 5.135E-01 | 0.988 | cis | Severe COVID-19 |
| 3310_62   | FCG2B                   | Low affinity immunoglobulin gamma Fc region receptor II-b              | P31994 | FCGR2B    | chr1:161663143  | Inverse variance weighted | 12 | 0.045  | 0.068 | 5.137E-01 | 0.988 | cis | Severe COVID-19 |
| 9357_4    | CREG1                   | Protein CREG1                                                          | Q75629 | CREG1     | chr1:167553805  | Inverse variance weighted | 2  | -0.057 | 0.088 | 5.141E-01 | 0.988 | cis | Severe COVID-19 |
| 17786_5   | GGPP5                   | Geranylgeranyl pyrophosphate synthase                                  | O95749 | GGPS1     | chr1:235327350  | Wald ratio                | 1  | -0.110 | 0.169 | 5.146E-01 | 0.988 | cis | Severe COVID-19 |
| 9876_20   | aldolase C              | Fructose-bisphosphate aldolase C                                       | P09972 | ALDOC     | chr17:28576948  | Inverse variance weighted | 2  | -0.315 | 0.485 | 5.153E-01 | 0.988 | cis | Severe COVID-19 |
| 3835_11   | TLR2                    | Toll-like receptor 2                                                   | O60603 | TLR2      | chr4:153684070  | Wald ratio                | 1  | -0.376 | 0.579 | 5.158E-01 | 0.988 | cis | Severe COVID-19 |
| 12637_7   | CACP                    | Carnitine O-acetyltransferase                                          | P43155 | CRAT      | chr9:129111189  | Wald ratio                | 1  | 0.106  | 0.163 | 5.165E-01 | 0.988 | cis | Severe COVID-19 |
| 7779_86   | CHSTB                   | Carbohydrate sulfotransferase 11                                       | Q9NPF2 | CHST11    | chr12:104455295 | Inverse variance weighted | 5  | -0.039 | 0.060 | 5.176E-01 | 0.988 | cis | Severe COVID-19 |
| 2654_19   | TNF sr-I                | Tumor necrosis factor receptor superfamily member 1A                   | P19438 | TNFRSF1A  | chr12:6342114   | Wald ratio                | 1  | -0.084 | 0.130 | 5.194E-01 | 0.988 | cis | Severe COVID-19 |
| 7198_197  | FA20B                   | Glycosaminoglycan xylosylkinase                                        | O75063 | FAM20B    | chr1:179025804  | Inverse variance weighted | 2  | 0.111  | 0.172 | 5.204E-01 | 0.988 | cis | Severe COVID-19 |
| 17737_7   | IVD                     | Isovaleryl-CoA dehydrogenase, mitochondrial                            | P26440 | IVD       | chr15:40405485  | Inverse variance weighted | 2  | 0.115  | 0.178 | 5.208E-01 | 0.988 | cis | Severe COVID-19 |
| 18831_6   | LRIG1                   | Leucine-rich repeats and immunoglobulin-like domains protein 1         | Q96JA1 | LRIG1     | chr3:66501263   | Inverse variance weighted | 8  | -0.030 | 0.046 | 5.219E-01 | 0.988 | cis | Severe COVID-19 |
| 10666_7   | GNPTG                   | N-acetylglucosamine-1-phosphotransferase subunit gamma                 | Q9UIJ9 | GNPTG     | chr16:1351931   | Inverse variance weighted | 4  | 0.048  | 0.076 | 5.222E-01 | 0.988 | cis | Severe COVID-19 |
| 12408_333 | RB22A                   | Ras-related protein Rab-22A                                            | Q9UL26 | RAB22A    | chr20:58309715  | Wald ratio                | 1  | 0.213  | 0.332 | 5.222E-01 | 0.988 | cis | Severe COVID-19 |
| 15529_33  | Cysteine-rich protein 1 | Cysteine and glycine-rich protein 1                                    | P21291 | CSR1P     | chr1:201509456  | Wald ratio                | 1  | -0.106 | 0.166 | 5.234E-01 | 0.988 | cis | Severe COVID-19 |
| 14747_9   | CRLF1                   | Cytokine receptor-like factor 1                                        | O75462 | CRLF1     | chr19:18607741  | Inverse variance weighted | 2  | -0.043 | 0.068 | 5.246E-01 | 0.988 | cis | Severe COVID-19 |
| 5392_73   | Fas, soluble            | Tumor necrosis factor receptor superfamily member 6                    | P25445 | FAS       | chr10:88953813  | Inverse variance weighted | 2  | 0.146  | 0.230 | 5.257E-01 | 0.988 | cis | Severe COVID-19 |
| 14076_74  | Cystatin-S              | Cystatin-S                                                             | P01036 | CSTA      | chr20:23689038  | Inverse variance weighted | 3  | -0.059 | 0.093 | 5.264E-01 | 0.988 | cis | Severe COVID-19 |
| 19614_8   | Holo-TCI                | Transcobalamin-1                                                       | P20061 | TCN1      | chr11:59866489  | Inverse variance weighted | 5  | 0.027  | 0.042 | 5.273E-01 | 0.988 | cis | Severe COVID-19 |
| 17370_186 | ABHDA                   | Mycophenolic acid acyl-glucuronide esterase, mitochondrial             | Q9NUJ1 | ABHD10    | chr3:111979010  | Wald ratio                | 1  | -0.183 | 0.290 | 5.278E-01 | 0.988 | cis | Severe COVID-19 |
| 3554_24   | Adiponectin             | Adiponectin                                                            | LI5848 | ADIPOQ    | chr3:186842704  | Inverse variance weighted | 4  | -0.042 | 0.066 | 5.295E-01 | 0.988 | cis | Severe COVID-19 |
| 17758_79  | DCXR                    | L-xylulose reductase                                                   | Q7Z4W1 | DCXR      | chr17:82037709  | Inverse variance weighted | 2  | 0.098  | 0.156 | 5.299E-01 | 0.988 | cis | Severe COVID-19 |
| 4775_34   | Gelsolin                | Gelsolin                                                               | P06396 | GSN       | chr9:121207794  | Inverse variance weighted | 2  | 0.079  | 0.126 | 5.301E-01 | 0.988 | cis | Severe COVID-19 |
| 11161_5   | SPG20                   | Spartin                                                                | Q8N0K7 | SPART     | chr13:36370180  | Wald ratio                | 1  | 0.200  | 0.320 | 5.308E-01 | 0.988 | cis | Severe COVID-19 |
| 18841_1   | SPB13                   | Serpin B13                                                             | Q9UIV8 | SERPINF13 | chr18:63586989  | Inverse variance weighted | 4  | 0.064  | 0.102 | 5.308E-01 | 0.988 | cis | Severe COVID-19 |
| 3293_2    | CD5L                    | CD5 antigen-like                                                       | O43866 | CD5L      | chr1:157898256  | Inverse variance weighted | 4  | -0.053 | 0.084 | 5.312E-01 | 0.988 | cis | Severe COVID-19 |
| 16296_43  | LGR5                    | Leucine-rich repeat-containing G-protein coupled receptor 5            | O75473 | LGR5      | chr12:71439798  | Wald ratio                | 1  | -0.167 | 0.267 | 5.329E-01 | 0.988 | cis | Severe COVID-19 |
| 5601_2    | PGRP-L                  | N-acetylmuramoyl-L-alanine amidase                                     | Q96P05 | PGLYRP2   | chr19:15498956  | Inverse variance weighted | 5  | 0.031  | 0.050 | 5.330E-01 | 0.988 | cis | Severe COVID-19 |
| 5478_50   | PSMA                    | Glutamate carboxypeptidase 2                                           | Q04609 | FOLH1     | chr11:49208638  | Inverse variance weighted | 2  | -0.062 | 0.100 | 5.342E-01 | 0.988 | cis | Severe COVID-19 |
| 18397_5   | AK1C4                   | Aldo-keto reductase family 1 member C4                                 | P17516 | AKR1C4    | chr10:5195462   | Inverse variance weighted | 8  | 0.032  | 0.051 | 5.344E-01 | 0.988 | cis | Severe COVID-19 |
| 3191_50   | WFKN1                   | WAP, kazal, immunoglobulin, kunitz and NTR domain-containing protein 1 | Q96N28 | WFIKN1    | chr16:629239    | Inverse variance weighted | 2  | -0.071 | 0.115 | 5.351E-01 | 0.988 | cis | Severe COVID-19 |
| 17794_6   | Phosphomannomutase 2    | Phosphomannomutase 2                                                   | O15305 | PMNM2     | chr16:8788823   | Inverse variance weighted | 4  | 0.063  | 0.102 | 5.353E-01 | 0.988 | cis | Severe COVID-19 |
| 8248_222  | SIG14                   | Sialic acid-binding Ig-like lectin 14                                  | Q08T72 | SIGLEC14  | chr19:51646825  | Inverse variance weighted | 3  | 0.088  | 0.142 | 5.353E-01 | 0.988 | cis | Severe COVID-19 |
| 10815_2   | HABP4                   | Intracellular hyaluronan-binding protein 4                             | Q5JV50 | HABP4     | chr9:96450169   | Inverse variance weighted | 3  | -0.035 | 0.057 | 5.358E-01 | 0.988 | cis | Severe COVID-19 |
| 10892_8   | OSMR                    | Oncostatin-M-specific receptor subunit beta                            | Q96500 | OSMR      | chr5:38845858   | Inverse variance weighted | 2  | 0.099  | 0.161 | 5.361E-01 | 0.988 | cis | Severe COVID-19 |
| 7211_2    | RNase A                 | Ribonuclease pancreatic                                                | P07998 | RNA5E1    | chr14:20802855  | Inverse variance weighted | 4  | -0.100 | 0.162 | 5.361E-01 | 0.988 | cis | Severe COVID-19 |
| 4906_35   | Coagulation Factor V    | Coagulation Factor V                                                   | P12259 | F5        | chr1:169586588  | Inverse variance weighted | 5  | 0.030  | 0.049 | 5.365E-01 | 0.988 | cis | Severe COVID-19 |
| 18864_7   | TRY3                    | Trypsin-3                                                              | P35030 | PRSS3     | chr9:33750679   | Inverse variance weighted | 4  | -0.023 | 0.037 | 5.366E-01 | 0.988 | cis | Severe COVID-19 |
| 14067_6   | PKP2                    | Plakophilin-2                                                          | Q99959 | PKP2      | chr12:32896777  | Inverse variance weighted | 2  | 0.095  | 0.154 | 5.369E-01 | 0.988 | cis | Severe COVID-19 |
| 5015_15   | PAFAH                   | Platelet-activating factor acetylhydrolase                             | Q13093 | PLA2G7    | chr6:46735693   | Inverse variance weighted | 2  | -0.109 | 0.177 | 5.374E-01 | 0.988 | cis | Severe COVID-19 |
| 9278_9    | SDF-1                   | Stromal cell-derived factor 1                                          | P48061 | CXCL12    | chr10:44386493  | Inverse variance weighted | 2  | 0.103  | 0.167 | 5.375E-01 | 0.988 | cis | Severe COVID-19 |
| 17756_69  | DCTD                    | Deoxycytidylate deaminase                                              | P32321 | DCTD      | chr4:182917936  | Inverse variance weighted | 2  | 0.169  | 0.274 | 5.382E-01 | 0.988 | cis | Severe COVID-19 |
| 18340_2   | Proteasome beta chain   | Proteasome subunit beta type-4                                         | P28070 | PSMB4     | chr1:151399560  | Inverse variance weighted | 4  | -0.026 | 0.042 | 5.388E-01 | 0.988 | cis | Severe COVID-19 |
| 6367_66   | fibromodulin            | fibromodulin                                                           | Q06828 | FMOD      | chr1:203351758  | Inverse variance weighted | 2  | -0.052 | 0.084 | 5.399E-01 | 0.988 | cis | Severe COVID-19 |
| 2979_8    | ENA-78                  | C-X-C motif chemokine 5                                                | P42830 | CXCL5     | chr4:73998677   | Wald ratio                | 1  | -0.244 | 0.399 | 5.402E-01 | 0.988 | cis | Severe COVID-19 |
| 5708_1    | LEAP2                   | Liver-expressed antimicrobial peptide 2                                | Q969E1 | LEAP2     | chr5:132873444  | Inverse variance weighted | 5  | 0.028  | 0.046 | 5.402E-01 | 0.988 | cis | Severe COVID-19 |
| 4982_54   | Elafin                  | Elafin                                                                 | P19957 | PI3       | chr20:45174902  | Inverse variance weighted | 5  | 0.058  | 0.094 | 5.406E-01 | 0.988 | cis | Severe COVID-19 |
| 4145_58   | Neurotrophin-3          | Neurotrophin-3                                                         | P20783 | NTF3      | chr12:5432108   | Inverse variance weighted | 2  | -0.159 | 0.260 | 5.412E-01 | 0.988 | cis | Severe COVID-19 |
| 15542_19  | KCRU                    | Creatine kinase U-type, mitochondrial                                  | P12532 | CKMT1A    | chr15:43692886  | Wald ratio                | 1  | -0.092 | 0.151 | 5.427E-01 | 0.988 | cis | Severe COVID-19 |
| 3038_9    | I-TAC                   | C-X-C motif chemokine 11                                               | O14625 | CXCL11    | chr4:76041415   | Inverse variance weighted | 4  | -0.059 | 0.097 | 5.435E-01 | 0.988 | cis | Severe COVID-19 |
| 8970_9    | RIPK2                   | Receptor-interacting serine/threonine-protein kinase 2                 | O43353 | RIPK2     | chr8:89757806   | Wald ratio                | 1  | -0.157 | 0.259 | 5.439E-01 | 0.988 | cis | Severe COVID-19 |
| 4831_4    | sL-Selectin             | L-Selectin                                                             | P14151 | SELL      | chr1:169711702  | Inverse variance weighted | 7  | -0.022 | 0.036 | 5.439E-01 | 0.988 | cis | Severe COVID-19 |
| 4158_54   | uPA                     | Urokinase-type plasminogen activator                                   | P00749 | PLAU      | chr10:73909177  | Inverse variance weighted | 4  | 0.037  | 0.060 | 5.447E-01 | 0.988 | cis | Severe COVID-19 |
| 8258_22   | UXS1                    | UDP-glucuronic acid decarboxylase 1                                    | Q8NBZ7 | UXS1      | chr2:106194301  | Wald ratio                | 1  | -0.177 | 0.293 | 5.447E-01 | 0.988 | cis | Severe COVID-19 |
| 17341_89  | THIC                    | Acetyl-CoA acetyltransferase, cytosolic                                | Q98WD1 | ACAT2     | chr6:159762045  | Inverse variance weighted | 3  | 0.032  | 0.052 | 5.457E-01 | 0.988 | cis | Severe COVID-19 |
| 12333_87  | RPIA                    | Ribose-5-phosphate isomerase                                           | P49247 | RPIA      | chr2:88691673   | Inverse variance weighted | 2  | 0.090  | 0.149 | 5.462E-01 | 0.988 | cis | Severe COVID-19 |
| 18934_50  | Tissue transglutaminase | Protein-glutamine gamma-glutamyltransferase 2                          | P21980 | TGM2      | chr20:38166578  | Wald ratio                | 1  | 0.048  | 0.080 | 5.473E-01 | 0.988 | cis | Severe COVID-19 |
| 14133_93  | IL-1 sRII               | Interleukin-1 receptor type 2                                          | P27930 | IL1R2     | chr2:101991960  | Inverse variance weighted | 7  | -0.040 | 0.066 | 5.476E-01 | 0.988 | cis | Severe COVID-19 |
| 13624_17  | NADK                    | NAD kinase                                                             | O95544 | NADK      | chr1:1780457    | Wald ratio                | 1  | 0.070  | 0.116 | 5.481E-01 | 0.988 | cis | Severe COVID-19 |
| 3727_35   | PYY                     | Peptide YY                                                             | P10082 | PYY       | chr17:44004469  | Wald ratio                | 1  | -0.121 | 0.202 | 5.498E-01 | 0.988 | cis | Severe COVID-19 |
| 8300_82   | PEX14:N-term            | Peroxisomal membrane protein PEX14:N-term                              | O75381 | PEX14     | chr1:10472288   | Wald ratio                | 1  | -0.217 | 0.363 | 5.502E-01 | 0.988 | cis | Severe COVID-19 |
| 3728_52   | Secretin                | Secretin                                                               | P09683 | SCT       | chr11:627181    | Wald ratio                | 1  | -0.140 | 0.236 | 5.523E-01 | 0.988 | cis | Severe COVID-19 |
| 15388_24  | FcRIIIa                 | Low affinity immunoglobulin gamma Fc region receptor III-A             | O98637 | FCGR3A    | chr1:161550968  | Inverse variance weighted | 6  | -0.056 | 0.095 | 5.530E-01 | 0.988 | cis | Severe COVID-19 |
| 14655_1   | DJIC17                  | Dnai homolog subfamily C member 17                                     | Q9NVM6 | DNAIC17   | chr15:40807478  | Inverse variance weighted | 2  | -0.087 | 0.146 | 5.543E-01 | 0.988 | cis | Severe COVID-19 |
| 9234_8    | TWSG1                   | Twisted gastrulation protein homolog 1                                 | Q9GZX9 | TWSG1     | chr18:9334767   | Inverse variance weighted | 3  | -0.069 | 0.116 | 5.546E-01 | 0.988 | cis | Severe COVID-19 |
| 3007_7    | Siglec-9                | Sialic acid-binding Ig-like lectin 9                                   | Q9Y336 | SIGLEC9   | chr19:51124906  | Inverse variance weighted | 6  | 0.032  | 0.054 | 5.547E-01 | 0.988 | cis | Severe COVID-19 |
| 2743_5    | Sonic Hedgehog          | Sonic hedgehog protein                                                 | Q15465 | SHH       | chr7:155812463  | Inverse variance weighted | 2  | -0.099 | 0.168 | 5.551E-01 | 0.988 | cis | Severe COVID-19 |
| 4480_59   | C3b                     | Complement C3b                                                         | P01024 | C3        | chr19:6730562   | Wald ratio                | 1  | -0.202 | 0.343 | 5.555E-01 | 0.988 | cis | Severe COVID-19 |
| 15644_1   | Biotinidase             | Biotinidase                                                            | P43251 | BTD       | chr3:15601341   | Inverse variance weighted | 9  | 0.018  | 0.031 | 5.556E-01 | 0.988 | cis | Severe COVID-19 |
| 18398_1   | AK1D1                   | 3-oxo-5-beta-steroid 4-dehydrogenase                                   | P51857 | AKR1D1    | chr7:138002324  | Wald ratio                | 1  | 0.182  | 0.309 | 5.557E-01 | 0.988 | cis | Severe COVID-19 |

|           |                          |                                                                                                |         |          |                 |                           |   |        |       |           |       |     |                 |
|-----------|--------------------------|------------------------------------------------------------------------------------------------|---------|----------|-----------------|---------------------------|---|--------|-------|-----------|-------|-----|-----------------|
| 13107_9   | LYPD3                    | Ly6/PLAUR domain-containing protein 3                                                          | O95274  | LYPD3    | chr19:43465608  | Wald ratio                | 1 | 0.098  | 0.166 | 5.559E-01 | 0.988 | cis | Severe COVID-19 |
| 2860_19   | Karyopherin-a2           | Importin subunit alpha-1                                                                       | P52292  | KPNA2    | chr17:68035636  | Wald ratio                | 1 | 0.175  | 0.298 | 5.568E-01 | 0.988 | cis | Severe COVID-19 |
| 2974_61   | contactin-1              | Contactin-1                                                                                    | Q12860  | CNTN1    | chr12:40692439  | Inverse variance weighted | 4 | -0.030 | 0.051 | 5.588E-01 | 0.988 | cis | Severe COVID-19 |
| 17391_10  | SPF45                    | Splicing factor 45                                                                             | O96125  | RBM17    | chr10:6089034   | Inverse variance weighted | 2 | 0.041  | 0.070 | 5.600E-01 | 0.988 | cis | Severe COVID-19 |
| 9329_28   | TRML1:ECD                | Trem-like transcript 1 protein:Extracellular domain, Ig-like V-type domain                     | Q86VW5  | TREM1    | chr6:41154347   | Inverse variance weighted | 2 | 0.138  | 0.237 | 5.613E-01 | 0.988 | cis | Severe COVID-19 |
| 6383_90   | TLL1                     | Tollloid-like protein 1                                                                        | O43897  | TLL1     | chr4:165873237  | Inverse variance weighted | 2 | -0.161 | 0.277 | 5.614E-01 | 0.988 | cis | Severe COVID-19 |
| 8916_32   | STIM1:CD                 | Stromal interaction molecule 1:Cytoplasmic domain                                              | Q13586  | STIM1    | chr11:3854527   | Wald ratio                | 1 | 0.094  | 0.163 | 5.631E-01 | 0.988 | cis | Severe COVID-19 |
| 17140_57  | PDGFD                    | Platelet-derived growth factor D                                                               | O9GZP0  | PDGFD    | chr11:104164379 | Inverse variance weighted | 6 | -0.090 | 0.156 | 5.632E-01 | 0.988 | cis | Severe COVID-19 |
| 19115_13  | CMBL                     | Carboxymethylenebutenolide homolog                                                             | Q96D66  | CMBL     | chr5:10307902   | Wald ratio                | 1 | 0.056  | 0.098 | 5.633E-01 | 0.988 | cis | Severe COVID-19 |
| 10851_77  | IL27B                    | Interleukin-27 subunit beta                                                                    | Q14213  | EBI3     | chr19:4229523   | Inverse variance weighted | 7 | -0.016 | 0.028 | 5.636E-01 | 0.988 | cis | Severe COVID-19 |
| 9177_6    | FAM3B                    | Protein FAM3B                                                                                  | P58499  | FAM3B    | chr21:41304212  | Inverse variance weighted | 7 | -0.034 | 0.059 | 5.637E-01 | 0.988 | cis | Severe COVID-19 |
| 6408_2    | INHBC                    | Inhibin beta C chain                                                                           | P55103  | INHBC    | chr12:57434784  | Inverse variance weighted | 2 | -0.102 | 0.176 | 5.641E-01 | 0.988 | cis | Severe COVID-19 |
| 15495_9   | FOLR3                    | Folate receptor gamma                                                                          | P41439  | FOLR3    | chr11:72114869  | Inverse variance weighted | 9 | 0.021  | 0.036 | 5.645E-01 | 0.988 | cis | Severe COVID-19 |
| 5134_52   | TIMD3                    | Hepatitis A virus cellular receptor 2                                                          | Q8TDQ0  | HAVCR2   | chr5:157142869  | Inverse variance weighted | 7 | 0.025  | 0.044 | 5.646E-01 | 0.988 | cis | Severe COVID-19 |
| 9017_58   | LPH                      | Lactase-phlorizin hydrolase                                                                    | P09848  | LCT      | chr2:135837184  | Inverse variance weighted | 4 | -0.018 | 0.031 | 5.648E-01 | 0.988 | cis | Severe COVID-19 |
| 13122_19  | FLRT2                    | Leucine-rich repeat transmembrane protein FLRT2                                                | O43155  | FLRT2    | chr14:85530144  | Inverse variance weighted | 5 | 0.031  | 0.053 | 5.652E-01 | 0.988 | cis | Severe COVID-19 |
| 15298_199 | NETO1                    | Neuropilin and tolloid-like protein 1                                                          | Q8TDF5  | NETO1    | chr18:72868146  | Inverse variance weighted | 2 | -0.175 | 0.305 | 5.659E-01 | 0.988 | cis | Severe COVID-19 |
| 9837_60   | NAD(P)H dehydrogenase    | NAD(P)H dehydrogenase [quinone] 1                                                              | P15559  | NQO1     | chr6:69726668   | Inverse variance weighted | 9 | -0.014 | 0.024 | 5.676E-01 | 0.988 | cis | Severe COVID-19 |
| 6919_3    | HBAZ                     | Hemoglobin subunit zeta                                                                        | P02008  | HBZ      | chr16:142728    | Inverse variance weighted | 6 | 0.021  | 0.037 | 5.684E-01 | 0.988 | cis | Severe COVID-19 |
| 11257_1   | DHPR                     | Dihydropteridine reductase                                                                     | P09417  | QDPR     | chr4:17512206   | Inverse variance weighted | 4 | 0.027  | 0.048 | 5.685E-01 | 0.988 | cis | Severe COVID-19 |
| 12659_13  | GTPB9                    | Obg-like ATPase 1                                                                              | Q9NTK5  | OLA1     | chr2:174248599  | Wald ratio                | 1 | -0.063 | 0.111 | 5.704E-01 | 0.988 | cis | Severe COVID-19 |
| 7905_30   | HPT                      | Haptoglobin isoform 2                                                                          | P00738  | HP       | chr16:72054505  | Wald ratio                | 1 | -0.034 | 0.060 | 5.710E-01 | 0.988 | cis | Severe COVID-19 |
| 13090_17  | S100A6                   | Protein S100-A6                                                                                | P06703  | S100A6   | chr1:153536244  | Inverse variance weighted | 2 | 0.137  | 0.242 | 5.713E-01 | 0.988 | cis | Severe COVID-19 |
| 9832_33   | HGD                      | Homogentisate 1,2-dioxygenase                                                                  | Q93099  | HGD      | chr13:20682269  | Inverse variance weighted | 2 | -0.071 | 0.126 | 5.726E-01 | 0.988 | cis | Severe COVID-19 |
| 11109_56  | SVEP1:Sushi 15-18        | Sushi, von Willebrand factor type A, EGF and pentraxin domain-containing protein 1:Sushi 15-18 | Q4LDDE  | SVEP1    | chr9:110579880  | Inverse variance weighted | 4 | 0.088  | 0.157 | 5.739E-01 | 0.988 | cis | Severe COVID-19 |
| 16882_27  | PHP14                    | 14 kDa phosphohistidine phosphatase                                                            | Q3NRX4  | PHPT1    | chr9:136848724  | Inverse variance weighted | 2 | 0.132  | 0.235 | 5.740E-01 | 0.988 | cis | Severe COVID-19 |
| 9916_146  | LRCA8:ECD                | Leucine-rich repeat-containing protein 48:Extracellular domain                                 | Q9NT99  | LRRCA8   | chr19:50568435  | Inverse variance weighted | 2 | 0.125  | 0.222 | 5.743E-01 | 0.988 | cis | Severe COVID-19 |
| 2968_61   | TNFSF15                  | Tumor necrosis factor ligand superfamily member 15                                             | O95150  | TNFSF15  | chr9:114806039  | Wald ratio                | 1 | -0.155 | 0.277 | 5.763E-01 | 0.988 | cis | Severe COVID-19 |
| 12401_3   | STALP                    | AMSH-like protease                                                                             | Q96FJ0  | STAMBP1  | chr10:88879734  | Wald ratio                | 1 | 0.089  | 0.159 | 5.764E-01 | 0.988 | cis | Severe COVID-19 |
| 18891_98  | GBP2                     | Guanylate-binding protein 2                                                                    | P32456  | GBP2     | chr1:89150456   | Wald ratio                | 1 | -0.110 | 0.198 | 5.769E-01 | 0.988 | cis | Severe COVID-19 |
| 3234_23   | URB                      | Coiled-coil domain-containing protein 80                                                       | Q76M96  | CCDC80   | chr3:112649530  | Inverse variance weighted | 2 | 0.092  | 0.164 | 5.770E-01 | 0.988 | cis | Severe COVID-19 |
| 5542_22   | NRP1                     | Neuropilin-1                                                                                   | Q14786  | NRP1     | chr10:33336262  | Inverse variance weighted | 5 | -0.025 | 0.044 | 5.772E-01 | 0.988 | cis | Severe COVID-19 |
| 15585_304 | fibulin 5                | Fibulin-5                                                                                      | Q9UBX5  | FBLN5    | chr14:91947987  | Wald ratio                | 1 | -0.102 | 0.183 | 5.772E-01 | 0.988 | cis | Severe COVID-19 |
| 18917_53  | Pancreatic alpha-amylase | Pancreatic alpha-amylase                                                                       | P04746  | AMY2A    | chr1:103617427  | Inverse variance weighted | 4 | -0.129 | 0.231 | 5.772E-01 | 0.988 | cis | Severe COVID-19 |
| 14006_36  | GNMT                     | Glycine N-methyltransferase                                                                    | Q14749  | GNMT     | chr6:42960754   | Wald ratio                | 1 | -0.074 | 0.132 | 5.774E-01 | 0.988 | cis | Severe COVID-19 |
| 15316_262 | TXN4B                    | Thioredoxin-like protein 4B                                                                    | Q9NX01  | TXNL4B   | chr16:72094431  | Wald ratio                | 1 | 0.096  | 0.173 | 5.792E-01 | 0.988 | cis | Severe COVID-19 |
| 8958_51   | CHL1                     | Neural cell adhesion molecule L1-like protein                                                  | O00533  | CHL1     | chr3:196763     | Inverse variance weighted | 6 | -0.037 | 0.067 | 5.800E-01 | 0.988 | cis | Severe COVID-19 |
| 11265_8   | Retinal dehydrogenase 1  | Retinal dehydrogenase 1                                                                        | P00352  | ALDH1A1  | chr9:73080442   | Wald ratio                | 1 | 0.115  | 0.208 | 5.802E-01 | 0.988 | cis | Severe COVID-19 |
| 9769_48   | DNER:ECD                 | Delta and Notch-like epidermal growth factor-related receptor:Extracellular domain             | Q8NF78  | DNER     | chr2:229714555  | Inverse variance weighted | 5 | -0.039 | 0.071 | 5.803E-01 | 0.988 | cis | Severe COVID-19 |
| 3025_50   | bFGF                     | Fibroblast growth factor 2                                                                     | P09038  | FGF2     | chr4:122826682  | Inverse variance weighted | 6 | -0.021 | 0.038 | 5.826E-01 | 0.988 | cis | Severe COVID-19 |
| 8841_65   | CILP2                    | Cartilage intermediate layer protein 2                                                         | Q8IUL8  | CILP2    | chr19:19538248  | Wald ratio                | 1 | -0.117 | 0.213 | 5.838E-01 | 0.988 | cis | Severe COVID-19 |
| 17435_43  | ETFA                     | Electron transfer flavoprotein subunit alpha, mitochondrial                                    | P13804  | ETFA     | chr15:76311730  | Wald ratio                | 1 | -0.161 | 0.295 | 5.850E-01 | 0.988 | cis | Severe COVID-19 |
| 13125_45  | Vitronectin              | Vitronectin                                                                                    | P04004  | VTN      | chr17:28373091  | Inverse variance weighted | 9 | 0.016  | 0.030 | 5.852E-01 | 0.988 | cis | Severe COVID-19 |
| 3339_33   | TSP2                     | Thrombospondin-2                                                                               | P35442  | THBS2    | chr6:169254050  | Inverse variance weighted | 7 | -0.027 | 0.049 | 5.859E-01 | 0.988 | cis | Severe COVID-19 |
| 18342_2   | SERC                     | Phosphoserine aminotransferase                                                                 | Q9Y617  | PSAT1    | chr9:78297125   | Inverse variance weighted | 2 | -0.153 | 0.280 | 5.864E-01 | 0.988 | cis | Severe COVID-19 |
| 9335_28   | PSG9                     | Pregnancy-specific beta-1-glycoprotein 9                                                       | Q00887  | PSG9     | chr19:43269530  | Wald ratio                | 1 | -0.167 | 0.308 | 5.865E-01 | 0.988 | cis | Severe COVID-19 |
| 8687_26   | T106B                    | Transmembrane protein 106B                                                                     | Q9NUM4  | TMEM106B | chr7:12211270   | Inverse variance weighted | 2 | -0.075 | 0.139 | 5.866E-01 | 0.988 | cis | Severe COVID-19 |
| 17333_20  | ACADM                    | Medium-chain specific acyl-CoA dehydrogenase, mitochondrial                                    | P11310  | ACADM    | chr1:75724431   | Wald ratio                | 1 | -0.050 | 0.092 | 5.873E-01 | 0.988 | cis | Severe COVID-19 |
| 18241_1   | HEM6                     | Oxygen-dependent coproporphyrinogen-III oxidase, mitochondrial                                 | P36551  | CPOX     | chr3:98593648   | Inverse variance weighted | 4 | 0.044  | 0.081 | 5.883E-01 | 0.988 | cis | Severe COVID-19 |
| 4929_55   | SHBG                     | Sex hormone-binding globulin                                                                   | P04278  | SHBG     | chr17:7613946   | Inverse variance weighted | 2 | 0.081  | 0.150 | 5.885E-01 | 0.988 | cis | Severe COVID-19 |
| 9595_11   | B4GT2                    | Beta-1,4-galactosyltransferase 2                                                               | O60909  | B4GALT2  | chr1:43978943   | Inverse variance weighted | 4 | 0.029  | 0.054 | 5.889E-01 | 0.988 | cis | Severe COVID-19 |
| 18183_3   | ARH                      | Low density lipoprotein receptor adapter protein 1                                             | Q5SW96  | LDLRAP1  | chr1:25543606   | Inverse variance weighted | 2 | 0.082  | 0.151 | 5.900E-01 | 0.988 | cis | Severe COVID-19 |
| 17151_84  | IRF-3                    | Interferon regulatory factor 3                                                                 | Q14653  | IRF3     | chr19:49665875  | Wald ratio                | 1 | -0.108 | 0.201 | 5.907E-01 | 0.988 | cis | Severe COVID-19 |
| 17398_55  | HO-1                     | Heme oxygenase 1                                                                               | P09601  | HMOX1    | chr22:35380361  | Inverse variance weighted | 3 | -0.072 | 0.134 | 5.911E-01 | 0.988 | cis | Severe COVID-19 |
| 11288_26  | SNTC                     | Cytosolic purine 5'-nucleotidase                                                               | P49902  | NTSC2    | chr10:103277605 | Inverse variance weighted | 3 | -0.059 | 0.110 | 5.920E-01 | 0.988 | cis | Severe COVID-19 |
| 15444_45  | SCCA2                    | Serpin B4                                                                                      | P48594  | SERPINA4 | chr18:63644256  | Inverse variance weighted | 3 | -0.106 | 0.198 | 5.925E-01 | 0.988 | cis | Severe COVID-19 |
| 13465_5   | CCP1                     | Calciopressin-1                                                                                | P53805  | RCAN1    | chr21:34615113  | Wald ratio                | 1 | 0.137  | 0.257 | 5.926E-01 | 0.988 | cis | Severe COVID-19 |
| 18218_48  | CB032                    | CB1 cannabinoid receptor-interacting protein 1                                                 | Q96F85  | CNRIP1   | chr2:68320051   | Inverse variance weighted | 7 | 0.025  | 0.046 | 5.935E-01 | 0.988 | cis | Severe COVID-19 |
| 11369_23  | ADHX                     | Alcohol dehydrogenase class-3                                                                  | P11766  | ADH5     | chr4:99088801   | Inverse variance weighted | 3 | -0.130 | 0.244 | 5.935E-01 | 0.988 | cis | Severe COVID-19 |
| 16606_85  | Aldose reductase         | Aldose reductase                                                                               | P15121  | AKR1B1   | chr7:134459284  | Inverse variance weighted | 2 | -0.066 | 0.124 | 5.941E-01 | 0.988 | cis | Severe COVID-19 |
| 2750_3    | Apo A-I                  | Apolipoprotein A-I                                                                             | P02647  | APOA1    | chr11:116837622 | Inverse variance weighted | 3 | -0.068 | 0.127 | 5.943E-01 | 0.988 | cis | Severe COVID-19 |
| 9313_27   | CBLN1                    | Cerebellin-1                                                                                   | P23435  | CBLN1    | chr16:49281838  | Inverse variance weighted | 9 | -0.029 | 0.055 | 5.944E-01 | 0.988 | cis | Severe COVID-19 |
| 14100_63  | C1QC                     | Complement C1q subcomponent subunit C                                                          | P02747  | C1QC     | chr1:22643014   | Inverse variance weighted | 9 | -0.034 | 0.064 | 5.948E-01 | 0.988 | cis | Severe COVID-19 |
| 15544_25  | kallikrein 14            | Kallikrein-14                                                                                  | Q9POG3  | KLK14    | chr19:51084245  | Inverse variance weighted | 2 | -0.131 | 0.247 | 5.957E-01 | 0.988 | cis | Severe COVID-19 |
| 8874_53   | CLN5:LD                  | Ceroid-lipofuscinosis neuronal protein 5:Luminal domain                                        | O75503  | CLN5     | chr13:76990660  | Wald ratio                | 1 | -0.083 | 0.156 | 5.959E-01 | 0.988 | cis | Severe COVID-19 |
| 8360_169  | Nkp46                    | Natural cytotoxicity triggering receptor 1                                                     | O76036  | NCR1     | chr19:54906148  | Wald ratio                | 1 | 0.086  | 0.162 | 5.960E-01 | 0.988 | cis | Severe COVID-19 |
| 8394_56   | RNase 2                  | Non-secretory ribonuclease                                                                     | P10153  | RNASE2   | chr14:20955487  | Wald ratio                | 1 | -0.136 | 0.257 | 5.969E-01 | 0.988 | cis | Severe COVID-19 |
| 13676_46  | Inhibin bB chain         | Inhibin beta B chain                                                                           | P09529  | INHBB    | chr2:120346136  | Inverse variance weighted | 4 | 0.037  | 0.069 | 5.981E-01 | 0.988 | cis | Severe COVID-19 |
| 11313_100 | PHS                      | Pterin-4-alpha-carbinolamine dehydratase                                                       | P61457  | PCB01    | chr10:70888565  | Inverse variance weighted | 5 | 0.048  | 0.091 | 5.981E-01 | 0.988 | cis | Severe COVID-19 |
| 15530_33  | EphB4                    | Ephrin type-B receptor 4                                                                       | P54760  | EPHBA    | chr7:100827523  | Wald ratio                | 1 | -0.112 | 0.212 | 5.981E-01 | 0.988 | cis | Severe COVID-19 |
| 10451_11  | NUCB1                    | Nucleobindin-1                                                                                 | Q02818  | NUCB1    | chr19:48900050  | Inverse variance weighted | 3 | -0.044 | 0.083 | 5.988E-01 | 0.988 | cis | Severe COVID-19 |
| 5803_24   | C3d                      | Complement C3d fragment                                                                        | P01024  | C3       | chr19:6730562   | Wald ratio                | 1 | 0.143  | 0.273 | 5.996E-01 | 0.988 | cis | Severe COVID-19 |
| 3593_72   | Caspase-3                | Caspase-3                                                                                      | P42574  | CASP3    | chr4:184650062  | Wald ratio                | 1 | 0.082  | 0.157 | 5.997E-01 | 0.988 | cis | Severe COVID-19 |
| 3132_1    | VEGF-C                   | Vascular endothelial growth factor C                                                           | P49767  | VEGFC    | chr4:176792922  | Wald ratio                | 1 | -0.098 | 0.186 | 5.999E-01 | 0.988 | cis | Severe COVID-19 |
| 10754_113 | Prokineticin-2           | Prokineticin-2                                                                                 | Q9HC23  | PROK2    | chr3:71785206   | Inverse variance weighted | 6 | -0.020 | 0.038 | 6.006E-01 | 0.988 | cis | Severe COVID-19 |
| 9350_3    | FSTL4                    | Follistatin-related protein 4                                                                  | Q6QM2W2 | FSTL4    | chr5:133612541  | Inverse variance weighted | 2 | 0.100  | 0.190 | 6.006E-01 | 0.988 | cis | Severe COVID-19 |
| 8233_2    | ITIH5                    | Inter-alpha-trypsin inhibitor heavy chain H5                                                   | Q86UX2  | ITIH5    | chr10:7666998   | Inverse variance weighted | 7 | -0.024 | 0.045 | 6.009E-01 | 0.988 | cis | Severe COVID-19 |
| 5798_3    | BID                      | BH3-interacting domain death agonist                                                           | P55957  | BID      | chr22:17774770  | Wald ratio                | 1 | 0.098  | 0.188 | 6.011E-01 | 0.988 | cis | Severe COVID-19 |

|           |                                  |                                                                      |                 |                 |                 |                           |    |        |       |           |       |     |                 |
|-----------|----------------------------------|----------------------------------------------------------------------|-----------------|-----------------|-----------------|---------------------------|----|--------|-------|-----------|-------|-----|-----------------|
| 6392_7    | WISP-2                           | WNT1-inducible-signaling pathway protein 2                           | O76076          | CCN5            | chr20:44714844  | Inverse variance weighted | 5  | 0.031  | 0.059 | 6.015E-01 | 0.988 | cis | Severe COVID-19 |
| 18185_118 | ALDOB                            | Fructose-bisphosphate aldolase B                                     | P05662          | ALDOB           | chr9:101449664  | Inverse variance weighted | 2  | 0.035  | 0.067 | 6.017E-01 | 0.988 | cis | Severe COVID-19 |
| 2687_2    | MIA                              | Melanoma-derived growth regulatory protein                           | P06674          | MIA             | chr19:40771648  | Inverse variance weighted | 7  | 0.025  | 0.049 | 6.024E-01 | 0.988 | cis | Severe COVID-19 |
| 5457_5    | COLEC12                          | Collectin-12                                                         | Q5KU26          | COLEC12         | chr18:500722    | Inverse variance weighted | 3  | 0.045  | 0.086 | 6.025E-01 | 0.988 | cis | Severe COVID-19 |
| 2948_58   | Growth hormone receptor          | Growth hormone receptor                                              | P10912          | GHR             | chr5:42423439   | Inverse variance weighted | 4  | -0.049 | 0.095 | 6.026E-01 | 0.988 | cis | Severe COVID-19 |
| 4534_10   | BSSP4                            | Brain-specific serine protease 4                                     | Q9GZNA          | PRSS22          | chr16:2858170   | Inverse variance weighted | 4  | -0.033 | 0.064 | 6.028E-01 | 0.988 | cis | Severe COVID-19 |
| 5649_83   | PSG4                             | Pregnancy-specific beta-1-glycoprotein 4                             | QO0888          | PSG4            | chr19:43207299  | Inverse variance weighted | 2  | -0.085 | 0.163 | 6.034E-01 | 0.988 | cis | Severe COVID-19 |
| 12524_18  | SAT2                             | Diamine acetyltransferase 2                                          | Q96F10          | SAT2            | chr17:7627876   | Inverse variance weighted | 3  | -0.083 | 0.160 | 6.036E-01 | 0.988 | cis | Severe COVID-19 |
| 11351_233 | NHEJ1                            | Non-homologous end-joining factor 1                                  | Q9H9Q4          | NHEJ1           | chr2:219160869  | Inverse variance weighted | 3  | -0.063 | 0.122 | 6.045E-01 | 0.988 | cis | Severe COVID-19 |
| 18873_8   | CEAM8                            | Carcinoembryonic antigen-related cell adhesion molecule 8            | P31997          | CEACAM8         | chr19:42595055  | Wald ratio                | 1  | -0.175 | 0.338 | 6.046E-01 | 0.988 | cis | Severe COVID-19 |
| 6897_38   | B3GA3                            | Galactosylgalactosylxylosylprotein 3-beta-glucuronosyltransferase 3  | O94766          | B3GAT3          | chr11:62622154  | Inverse variance weighted | 3  | 0.052  | 0.100 | 6.055E-01 | 0.988 | cis | Severe COVID-19 |
| 13671_40  | Elastase                         | Neutrophil elastase                                                  | P08246          | ELANE           | chr19:851014    | Inverse variance weighted | 5  | -0.039 | 0.075 | 6.059E-01 | 0.988 | cis | Severe COVID-19 |
| 8310_6    | U773                             | Zymogen granule protein 16 homolog B                                 | Q96DAO          | ZG16B           | chr16:2830253   | Wald ratio                | 1  | 0.049  | 0.095 | 6.068E-01 | 0.988 | cis | Severe COVID-19 |
| 2771_35   | IGFBP-1                          | Insulin-like growth factor-binding protein 1                         | P08833          | IGFBP1          | chr7:45888360   | Wald ratio                | 1  | 0.102  | 0.199 | 6.070E-01 | 0.988 | cis | Severe COVID-19 |
| 16323_8   | NRX3A                            | Neurexin-3                                                           | Q9Y4C0          | NRXN3           | chr14:78170373  | Wald ratio                | 1  | 0.161  | 0.313 | 6.071E-01 | 0.988 | cis | Severe COVID-19 |
| 9545_156  | Granzyme K                       | Granzyme K                                                           | P49863          | GZMK            | chr5:55024256   | Wald ratio                | 1  | 0.053  | 0.103 | 6.071E-01 | 0.988 | cis | Severe COVID-19 |
| 9026_40   | BTNL8                            | Butyrophilin-like protein 8                                          | Q6UX41          | BTNL8           | chr5:180899077  | Inverse variance weighted | 2  | -0.047 | 0.092 | 6.075E-01 | 0.988 | cis | Severe COVID-19 |
| 2827_23   | Fractalkine/CX3CL-1              | Fractalkine                                                          | P78423          | CX3CL1          | chr16:57372477  | Wald ratio                | 1  | -0.083 | 0.161 | 6.079E-01 | 0.988 | cis | Severe COVID-19 |
| 9772_153  | NLGN2:ECD                        | Neurologin-2:Extracellular domain                                    | Q8NF24          | NLGN2           | chr17:7404874   | Inverse variance weighted | 2  | 0.060  | 0.117 | 6.090E-01 | 0.988 | cis | Severe COVID-19 |
| 17782_23  | THIK                             | 3-ketoacyl-CoA thiolase, peroxisomal                                 | P09110          | ACAA1           | chr3:38137242   | Inverse variance weighted | 5  | -0.036 | 0.070 | 6.092E-01 | 0.988 | cis | Severe COVID-19 |
| 15626_223 | Perlecan                         | Basement membrane-specific heparan sulfate proteoglycan core protein | P98160          | HSPG2           | chr1:21937310   | Inverse variance weighted | 4  | -0.026 | 0.052 | 6.093E-01 | 0.988 | cis | Severe COVID-19 |
| 12786_61  | GDE5                             | Glycerophosphocholine phosphodiesterase GPCPD1                       | Q9NP88          | GPCPD1          | chr20:5611006   | Inverse variance weighted | 2  | 0.090  | 0.176 | 6.102E-01 | 0.988 | cis | Severe COVID-19 |
| 12813_18  | EHBP1                            | EH domain-binding protein 1                                          | Q8ND01          | EHBP1           | chr2:62673851   | Wald ratio                | 1  | -0.155 | 0.303 | 6.102E-01 | 0.988 | cis | Severe COVID-19 |
| 9316_67   | WFD1                             | WAP four-disulfide core domain protein 1                             | Q9HC57          | WFD1            | chr16:84294846  | Inverse variance weighted | 5  | 0.021  | 0.041 | 6.102E-01 | 0.988 | cis | Severe COVID-19 |
| 14623_26  | SUMO3                            | Small ubiquitin-related modifier 3                                   | P55854          | SUMO3           | chr21:44818779  | Wald ratio                | 1  | 0.179  | 0.351 | 6.109E-01 | 0.988 | cis | Severe COVID-19 |
| 17231_1   | L-plastin                        | Plastin-2                                                            | P13796          | LCP1            | chr13:46211871  | Inverse variance weighted | 4  | 0.047  | 0.093 | 6.110E-01 | 0.988 | cis | Severe COVID-19 |
| 17819_30  | FAHD1                            | Acylpyruvase FAHD1, mitochondrial                                    | Q6PS87          | FAHD1           | chr16:1826967   | Inverse variance weighted | 3  | 0.174  | 0.343 | 6.116E-01 | 0.988 | cis | Severe COVID-19 |
| 3151_6    | IL-2 sRa                         | Interleukin-2 receptor subunit alpha                                 | P01589          | IL2RA           | chr10:6062370   | Wald ratio                | 1  | 0.084  | 0.165 | 6.117E-01 | 0.988 | cis | Severe COVID-19 |
| 12633_3   | PTN9                             | Tyrosine-protein phosphatase non-receptor type 9                     | P43378          | PTPN9           | chr15:75579315  | Wald ratio                | 1  | -0.132 | 0.261 | 6.119E-01 | 0.988 | cis | Severe COVID-19 |
| 19372_7   | MDGA2                            | MAM domain-containing glycosylphosphatidylinositol anchor protein 2  | Q7Z553          | MDGA2           | chr14:47675605  | Inverse variance weighted | 10 | -0.014 | 0.027 | 6.121E-01 | 0.988 | cis | Severe COVID-19 |
| 15466_30  | CO9A1                            | Collagen alpha-1(X) chain                                            | P20849          | COL9A1          | chr6:70303084   | Inverse variance weighted | 2  | 0.087  | 0.171 | 6.122E-01 | 0.988 | cis | Severe COVID-19 |
| 11211_7   | TBCE                             | Tubulin-specific chaperone E                                         | Q15813          | TBCE            | chr1:235367360  | Inverse variance weighted | 2  | -0.163 | 0.322 | 6.128E-01 | 0.988 | cis | Severe COVID-19 |
| 3474_19   | Thrombospondin-1                 | Thrombospondin-1                                                     | P07996          | THBS1           | chr15:39581079  | Wald ratio                | 1  | 0.158  | 0.312 | 6.131E-01 | 0.988 | cis | Severe COVID-19 |
| 3322_52   | LRIG3                            | Leucine-rich repeats and immunoglobulin-like domains protein 3       | Q8UXM1          | LRIG3           | chr12:58920504  | Inverse variance weighted | 6  | -0.020 | 0.039 | 6.137E-01 | 0.988 | cis | Severe COVID-19 |
| 11287_14  | Cytochrome b5                    | Cytochrome b5                                                        | P00167          | CYB5A           | chr18:74291973  | Wald ratio                | 1  | 0.194  | 0.384 | 6.139E-01 | 0.988 | cis | Severe COVID-19 |
| 10612_18  | PLOD3                            | Procollagen-lysine, 2-oxoglutarate 5-dioxygenase 3                   | O60568          | PLOD3           | chr7:101218420  | Inverse variance weighted | 2  | -0.077 | 0.152 | 6.150E-01 | 0.988 | cis | Severe COVID-19 |
| 9863_1    | Tropomyosin 4                    | Tropomyosin alpha-4 chain                                            | P67936          | TPM4            | chr19:16067021  | Wald ratio                | 1  | 0.101  | 0.200 | 6.151E-01 | 0.988 | cis | Severe COVID-19 |
| 15483_377 | Agrin                            | Agrin                                                                | O00468          | AGRN            | chr1:1020120    | Inverse variance weighted | 6  | -0.049 | 0.098 | 6.174E-01 | 0.988 | cis | Severe COVID-19 |
| 8973_23   | FCRL4:ECD                        | Fc receptor-like protein 4:Extracellular domain                      | Q96P15          | FCRL4           | chr1:157598085  | Inverse variance weighted | 13 | -0.027 | 0.053 | 6.193E-01 | 0.988 | cis | Severe COVID-19 |
| 5680_54   | OBP2B                            | Odorant-binding protein 2b                                           | Q9NPH6          | OBP2B           | chr9:133209250  | Inverse variance weighted | 4  | 0.036  | 0.072 | 6.194E-01 | 0.988 | cis | Severe COVID-19 |
| 8480_29   | FBLN3                            | EGF-containing fibulin-like extracellular matrix protein 1           | Q12805          | EFEMP1          | chr2:55924139   | Inverse variance weighted | 2  | 0.053  | 0.106 | 6.196E-01 | 0.988 | cis | Severe COVID-19 |
| 16079_2   | TEC                              | Tyrosine-protein kinase Tec                                          | P42680          | TEC             | chr4:48269838   | Inverse variance weighted | 2  | 0.060  | 0.122 | 6.200E-01 | 0.988 | cis | Severe COVID-19 |
| 15573_110 | CSPG3                            | Neurocan core protein                                                | O14594          | NCAN            | chr19:19211958  | Inverse variance weighted | 2  | 0.063  | 0.129 | 6.217E-01 | 0.988 | cis | Severe COVID-19 |
| 17164_15  | annexin IV                       | Annexin A4                                                           | P09525          | ANXA4           | chr2:69644425   | Inverse variance weighted | 2  | 0.063  | 0.128 | 6.217E-01 | 0.988 | cis | Severe COVID-19 |
| 19129_15  | MTFSD5                           | Methenyltetrahydrofolate synthase domain-containing protein          | Q2M296          | MTFSD5          | chr16:86555235  | Inverse variance weighted | 4  | 0.023  | 0.047 | 6.219E-01 | 0.988 | cis | Severe COVID-19 |
| 10903_50  | STX8                             | Syntaxin-8                                                           | Q9UNK0          | STX8            | chr17:9576591   | Wald ratio                | 1  | 0.118  | 0.241 | 6.233E-01 | 0.988 | cis | Severe COVID-19 |
| 10835_25  | AAGCT                            | Alpha-1,4-N-acetylglucosaminyltransferase                            | Q9UNA3          | AAGNT           | chr3:138132390  | Wald ratio                | 1  | -0.114 | 0.232 | 6.238E-01 | 0.988 | cis | Severe COVID-19 |
| 3323_37   | LRP8                             | Low-density lipoprotein receptor-related protein 8                   | Q14114          | LRP8            | chr1:53328469   | Inverse variance weighted | 2  | 0.037  | 0.075 | 6.239E-01 | 0.988 | cis | Severe COVID-19 |
| 13416_8   | T132D                            | Transmembrane protein 132D                                           | Q14C87          | TMEM132D        | chr12:129904025 | Inverse variance weighted | 6  | 0.030  | 0.061 | 6.249E-01 | 0.988 | cis | Severe COVID-19 |
| 7861_9    | ROR2                             | Tyrosine-protein kinase transmembrane receptor ROR2                  | Q01974          | ROR2            | chr9:91950228   | Inverse variance weighted | 2  | -0.046 | 0.094 | 6.250E-01 | 0.988 | cis | Severe COVID-19 |
| 13113_7   | Osteopontin                      | Osteopontin                                                          | P10451          | SPPI            | chr4:87975667   | Inverse variance weighted | 2  | 0.046  | 0.095 | 6.251E-01 | 0.988 | cis | Severe COVID-19 |
| 18220_141 | SRA1                             | Steroid receptor RNA activator 1                                     | Q9HD15          | SRA1            | chr5:140557677  | Inverse variance weighted | 2  | -0.087 | 0.178 | 6.251E-01 | 0.988 | cis | Severe COVID-19 |
| 18206_18  | ADH6                             | Alcohol dehydrogenase 6                                              | P28332          | ADH6            | chr4:99219537   | Wald ratio                | 1  | 0.114  | 0.233 | 6.252E-01 | 0.988 | cis | Severe COVID-19 |
| 4153_11   | alpha-1-antichymotrypsin complex | Alpha-1-antichymotrypsin complex                                     | P07288   P01011 | KLK3   SERPINA3 | chr14:94612384  | Inverse variance weighted | 3  | -0.071 | 0.146 | 6.260E-01 | 0.988 | cis | Severe COVID-19 |
| 5852_6    | S100A12                          | Protein S100-A12                                                     | P80511          | S100A12         | chr1:153375621  | Inverse variance weighted | 2  | 0.059  | 0.123 | 6.276E-01 | 0.988 | cis | Severe COVID-19 |
| 9211_19   | PEDF                             | Pigment epithelium-derived factor                                    | P36955          | SERPINF1        | chr17:1762029   | Inverse variance weighted | 3  | 0.026  | 0.053 | 6.286E-01 | 0.988 | cis | Severe COVID-19 |
| 12575_30  | C17C                             | C-1-tetrahydrofolate synthase, cytoplasmic                           | P11586          | MTFDF1          | chr14:64388031  | Inverse variance weighted | 2  | 0.074  | 0.153 | 6.296E-01 | 0.988 | cis | Severe COVID-19 |
| 12334_25  | cSHMT                            | Serine hydroxymethyltransferase, cytosolic                           | P34896          | SHMT1           | chr17:18363563  | Inverse variance weighted | 6  | -0.015 | 0.032 | 6.298E-01 | 0.988 | cis | Severe COVID-19 |
| 10419_1   | SCAR5                            | Scavenger receptor class A member 5                                  | Q6ZMJ2          | SCARAS          | chr8:27992673   | Inverse variance weighted | 5  | 0.035  | 0.073 | 6.304E-01 | 0.988 | cis | Severe COVID-19 |
| 18235_16  | PGP                              | Glycerol-3-phosphate phosphatase                                     | A6NDG6          | PGP             | chr16:2214840   | Wald ratio                | 1  | 0.083  | 0.173 | 6.316E-01 | 0.988 | cis | Severe COVID-19 |
| 16015_19  | ALT                              | Alanine aminotransferase 1                                           | P24298          | GPT             | chr8:144502973  | Wald ratio                | 1  | -0.134 | 0.281 | 6.320E-01 | 0.988 | cis | Severe COVID-19 |
| 17170_15  | CALCB                            | Calcitonin gene-related peptide 2                                    | P10092          | CALCB           | chr11:14904997  | Inverse variance weighted | 2  | -0.037 | 0.077 | 6.321E-01 | 0.988 | cis | Severe COVID-19 |
| 3292_75   | CD48                             | CD48 antigen                                                         | P09326          | CD48            | chr1:160711831  | Inverse variance weighted | 5  | 0.037  | 0.078 | 6.322E-01 | 0.988 | cis | Severe COVID-19 |
| 5301_7    | Eotaxin                          | Eotaxin                                                              | P51671          | CCL11           | chr17:34285742  | Wald ratio                | 1  | -0.079 | 0.165 | 6.323E-01 | 0.988 | cis | Severe COVID-19 |
| 3299_29   | Contactin-5                      | Contactin-5                                                          | O94779          | CNTN5           | chr11:99020949  | Inverse variance weighted | 3  | -0.054 | 0.112 | 6.325E-01 | 0.988 | cis | Severe COVID-19 |
| 6373_54   | DLK1                             | Protein delta homolog 1                                              | P80370          | DLK1            | chr14:100725705 | Inverse variance weighted | 2  | -0.110 | 0.231 | 6.327E-01 | 0.988 | cis | Severe COVID-19 |
| 8289_8    | GNPMB:ECD                        | Transmembrane glycoprotein NMB-Extracellular domain                  | Q14956          | GNPMB           | chr7:23235967   | Inverse variance weighted | 5  | -0.030 | 0.064 | 6.328E-01 | 0.988 | cis | Severe COVID-19 |
| 16913_8   | RNT2                             | Ribonuclease T2                                                      | O00584          | RNASET2         | chr6:166957191  | Inverse variance weighted | 6  | 0.016  | 0.035 | 6.345E-01 | 0.990 | cis | Severe COVID-19 |
| 17777_31  | SDSL                             | Serine dehydratase-like                                              | Q96GA7          | SDSL            | chr12:113422380 | Inverse variance weighted | 6  | 0.024  | 0.052 | 6.367E-01 | 0.990 | cis | Severe COVID-19 |
| 15462_28  | CDBA                             | T-cell surface glycoprotein CD8 alpha chain                          | P01732          | CDBA            | chr2:86808396   | Inverse variance weighted | 2  | -0.023 | 0.048 | 6.367E-01 | 0.990 | cis | Severe COVID-19 |
| 19143_38  | NBSR2                            | NADH-cytochrome b5 reductase 2                                       | Q6BCY4          | CYB5R2          | chr11:7677222   | Inverse variance weighted | 6  | 0.039  | 0.082 | 6.375E-01 | 0.990 | cis | Severe COVID-19 |
| 7110_2    | DJB11                            | Dnal homolog subfamily 8 member 11                                   | Q8UBS4          | DNAJB11         | chr3:186567403  | Inverse variance weighted | 2  | -0.069 | 0.146 | 6.382E-01 | 0.990 | cis | Severe COVID-19 |
| 9829_91   | SULT 2A1                         | Bile salt sulfotransferase                                           | Q06520          | SULT2A1         | chr19:47886315  | Wald ratio                | 1  | -0.045 | 0.095 | 6.383E-01 | 0.990 | cis | Severe COVID-19 |
| 17675_17  | ACO13                            | Acyl-coenzyme A thioesterase 13                                      | Q9NPJ3          | ACOT13          | chr6:24667035   | Inverse variance weighted | 2  | 0.079  | 0.168 | 6.387E-01 | 0.990 | cis | Severe COVID-19 |
| 11241_8   | ARLY                             | Argininosuccinate lyase                                              | P04424          | ASL             | chr7:86075800   | Inverse variance weighted | 3  | -0.054 | 0.115 | 6.390E-01 | 0.990 | cis | Severe COVID-19 |
| 2888_49   | C7                               | Complement component C7                                              | P10643          | C7              | chr5:40909492   | Inverse variance weighted | 5  | -0.015 | 0.033 | 6.395E-01 | 0.990 | cis | Severe COVID-19 |
| 8909_77   | GNP1                             | Glucosamine-6-phosphate isomerase 1                                  | P46926          | GNPDA1          | chr5:142013041  | Wald ratio                | 1  | 0.055  | 0.117 | 6.397E-01 | 0.990 | cis | Severe COVID-19 |
| 8956_96   | SREC-II:ECD                      | Scavenger receptor class F member 2:Extracellular domain             | Q96GP6          | SCARF2          | chr22:20437826  | Wald ratio                | 1  | 0.067  | 0.143 | 6.414E-01 | 0.991 | cis | Severe COVID-19 |

|           |                                  |                                                                   |         |          |                 |                           |    |        |       |           |       |     |                 |
|-----------|----------------------------------|-------------------------------------------------------------------|---------|----------|-----------------|---------------------------|----|--------|-------|-----------|-------|-----|-----------------|
| 11103_24  | HSP 27                           | Heat shock protein beta-1                                         | P04792  | HSPB1    | chr7:76302673   | Inverse variance weighted | 4  | -0.020 | 0.043 | 6.435E-01 | 0.991 | cis | Severe COVID-19 |
| 9459_7    | Fas, soluble                     | Tumor necrosis factor receptor superfamily member 6               | P25445  | FAS      | chr10:88953813  | Inverse variance weighted | 2  | -0.129 | 0.278 | 6.444E-01 | 0.991 | cis | Severe COVID-19 |
| 5646_20   | RNAS6                            | Ribonuclease K6                                                   | Q93091  | RNASE6   | chr14:20781268  | Inverse variance weighted | 7  | -0.014 | 0.030 | 6.467E-01 | 0.991 | cis | Severe COVID-19 |
| 7945_10   | Semaphorin-6A                    | Semaphorin-6A                                                     | Q9H2E6  | SEMA6A   | chr5:116574823  | Inverse variance weighted | 4  | -0.044 | 0.095 | 6.470E-01 | 0.991 | cis | Severe COVID-19 |
| 10396_6   | Mcl-1                            | Induced myeloid leukemia cell differentiation protein Mcl-1       | Q07820  | MCL1     | chr1:150579738  | Wald ratio                | 1  | -0.053 | 0.115 | 6.472E-01 | 0.991 | cis | Severe COVID-19 |
| 16599_38  | GNP1                             | GNP-loop GTPase 1                                                 | Q9HCN4  | GNP1     | chr2:27628247   | Wald ratio                | 1  | 0.090  | 0.197 | 6.474E-01 | 0.991 | cis | Severe COVID-19 |
| 9986_14   | Neuropeptide W                   | Neuropeptide W                                                    | Q8NT29  | NPW      | chr16:2009926   | Inverse variance weighted | 3  | -0.029 | 0.064 | 6.481E-01 | 0.991 | cis | Severe COVID-19 |
| 13481_24  | TCEA2                            | Transcription elongation factor A protein 2                       | IL15560 | TCEA2    | chr20:64049836  | Wald ratio                | 1  | -0.047 | 0.103 | 6.485E-01 | 0.991 | cis | Severe COVID-19 |
| 5648_28   | CTR82                            | Chymotrypsinogen B2                                               | Q6GP11  | CTR82    | chr16:75207161  | Inverse variance weighted | 8  | 0.010  | 0.021 | 6.487E-01 | 0.991 | cis | Severe COVID-19 |
| 17785_11  | RCL                              | 2'-deoxynucleoside 5'-phosphate N-hydrolase 1                     | O43598  | DNPH1    | chr6:43229481   | Wald ratio                | 1  | 0.120  | 0.263 | 6.490E-01 | 0.991 | cis | Severe COVID-19 |
| 2474_54   | SAP                              | Serum amyloid P-component                                         | P02743  | APCS     | chr1:159587826  | Inverse variance weighted | 3  | -0.037 | 0.081 | 6.492E-01 | 0.991 | cis | Severe COVID-19 |
| 9388_18   | MCEE                             | Methylmalonyl-CoA epimerase, mitochondrial                        | Q96PE7  | MCEE     | chr2:71130239   | Wald ratio                | 1  | 0.120  | 0.264 | 6.496E-01 | 0.991 | cis | Severe COVID-19 |
| 5089_11   | IL-7 Ra                          | Interleukin-7 receptor subunit alpha                              | P16871  | IL7R     | chr5:35852695   | Wald ratio                | 1  | 0.138  | 0.304 | 6.500E-01 | 0.991 | cis | Severe COVID-19 |
| 16322_10  | PACAP                            | Marginal zone B- and B1-cell-specific protein                     | Q8WU39  | MZB1     | chr5:139390081  | Inverse variance weighted | 3  | -0.059 | 0.131 | 6.510E-01 | 0.991 | cis | Severe COVID-19 |
| 4294_16   | Sphingosine kinase 1             | Sphingosine kinase 1                                              | Q9NYA1  | SPHK1    | chr17:76376584  | Inverse variance weighted | 2  | 0.073  | 0.162 | 6.513E-01 | 0.991 | cis | Severe COVID-19 |
| 10714_7   | ACE                              | Angiotensin-converting enzyme                                     | P12821  | ACE      | chr17:63477061  | Inverse variance weighted | 11 | -0.011 | 0.025 | 6.513E-01 | 0.991 | cis | Severe COVID-19 |
| 3519_3    | TARC                             | C-C motif chemokine 17                                            | Q92583  | CCL17    | chr16:57404767  | Inverse variance weighted | 2  | 0.036  | 0.079 | 6.519E-01 | 0.991 | cis | Severe COVID-19 |
| 10938_13  | sLFA-3                           | Lymphocyte function-associated antigen 3                          | P19256  | CD58     | chr1:116571039  | Inverse variance weighted | 2  | -0.086 | 0.191 | 6.527E-01 | 0.991 | cis | Severe COVID-19 |
| 4496_60   | MMP-12                           | Macrophage metalloelastase                                        | P39900  | MMP12    | chr11:102874982 | Inverse variance weighted | 7  | -0.013 | 0.029 | 6.533E-01 | 0.991 | cis | Severe COVID-19 |
| 19361_78  | MATN3                            | Matrilin-3                                                        | O15232  | MATN3    | chr2:20012668   | Inverse variance weighted | 12 | 0.014  | 0.031 | 6.533E-01 | 0.991 | cis | Severe COVID-19 |
| 6431_68   | PCYOX                            | Prenylcysteine oxidase 1                                          | Q9UHG3  | PCYOX1   | chr2:70257386   | Inverse variance weighted | 6  | 0.012  | 0.026 | 6.537E-01 | 0.991 | cis | Severe COVID-19 |
| 19367_34  | D3D2                             | Enoyl-CoA delta isomerase 1, mitochondrial                        | P42126  | EC11     | chr16:2252300   | Inverse variance weighted | 2  | 0.082  | 0.184 | 6.566E-01 | 0.995 | cis | Severe COVID-19 |
| 9175_48   | DSCAM                            | Down syndrome cell adhesion molecule                              | O60469  | DSCAM    | chr21:40847158  | Inverse variance weighted | 2  | -0.045 | 0.101 | 6.576E-01 | 0.995 | cis | Severe COVID-19 |
| 2609_59   | Cystatin C                       | Cystatin-C                                                        | P01034  | CT3      | chr20:23638473  | Inverse variance weighted | 2  | 0.065  | 0.147 | 6.579E-01 | 0.995 | cis | Severe COVID-19 |
| 11681_8   | NUPL                             | Arf-GAP domain and FG repeat-containing protein 1                 | P52594  | AGF61    | chr2:227472152  | Wald ratio                | 1  | -0.106 | 0.240 | 6.582E-01 | 0.995 | cis | Severe COVID-19 |
| 16292_288 | GIP                              | Gastric inhibitory polypeptide                                    | P09681  | GIP      | chr17:48968596  | Wald ratio                | 1  | -0.183 | 0.419 | 6.616E-01 | 0.996 | cis | Severe COVID-19 |
| 16035_8   | VEGF sR3                         | Vascular endothelial growth factor receptor 3                     | P35916  | FLT4     | chr5:180649624  | Inverse variance weighted | 3  | -0.048 | 0.110 | 6.633E-01 | 0.996 | cis | Severe COVID-19 |
| 12376_85  | p19-INK4d                        | Cyclin-dependent kinase 4 inhibitor D                             | P55273  | CDKN2D   | chr19:10569059  | Wald ratio                | 1  | -0.210 | 0.484 | 6.639E-01 | 0.996 | cis | Severe COVID-19 |
| 3313_21   | FCN2                             | Ficolin-2                                                         | IL15485 | FCN2     | chr9:134880810  | Inverse variance weighted | 3  | -0.044 | 0.101 | 6.643E-01 | 0.996 | cis | Severe COVID-19 |
| 7015_8    | LRB5                             | Leukocyte immunoglobulin-like receptor subfamily B member 5       | O75023  | LILRB5   | chr19:54257301  | Inverse variance weighted | 6  | 0.011  | 0.025 | 6.646E-01 | 0.996 | cis | Severe COVID-19 |
| 5275_28   | VAV                              | Proto-oncogene vav                                                | P15498  | VAV1     | chr19:6772708   | Wald ratio                | 1  | 0.121  | 0.279 | 6.652E-01 | 0.996 | cis | Severe COVID-19 |
| 16908_5   | OMG6                             | Oligodendrocyte-myelin glycoprotein                               | P23515  | OMG      | chr17:31297539  | Wald ratio                | 1  | 0.121  | 0.281 | 6.658E-01 | 0.996 | cis | Severe COVID-19 |
| 14090_23  | DEF16                            | Differentially expressed in FDCP 6 homolog                        | Q9HA67  | DEF6     | chr6:35297818   | Inverse variance weighted | 2  | -0.036 | 0.084 | 6.671E-01 | 0.996 | cis | Severe COVID-19 |
| 3045_72   | PTN                              | Pleiotrophin                                                      | P21246  | PTN      | chr7:137343774  | Inverse variance weighted | 3  | -0.031 | 0.072 | 6.679E-01 | 0.996 | cis | Severe COVID-19 |
| 7918_114  | Amylase, alpha 1A                | Alpha-amylase 1                                                   | P04745  | AMY1A    | chr1:103655760  | Inverse variance weighted | 11 | 0.031  | 0.073 | 6.681E-01 | 0.996 | cis | Severe COVID-19 |
| 10907_116 | NTRI                             | Neurotrimin                                                       | Q9P121  | NTM      | chr11:131370478 | Inverse variance weighted | 2  | 0.101  | 0.235 | 6.681E-01 | 0.996 | cis | Severe COVID-19 |
| 12641_3   | ISP2                             | Type II inositol 1,4,5-trisphosphate 5-phosphatase                | P32019  | INPP5B   | chr1:37947057   | Inverse variance weighted | 2  | 0.046  | 0.107 | 6.692E-01 | 0.996 | cis | Severe COVID-19 |
| 9275_2    | Siglec-5                         | Sialic acid-binding Ig-like lectin 5                              | O15389  | SIGLEC5  | chr19:51630401  | Wald ratio                | 1  | -0.122 | 0.286 | 6.705E-01 | 0.996 | cis | Severe COVID-19 |
| 19293_6   | VP26A                            | Vacuolar protein sorting-associated protein 26A                   | O75436  | VPS26A   | chr10:69123512  | Wald ratio                | 1  | -0.040 | 0.094 | 6.711E-01 | 0.996 | cis | Severe COVID-19 |
| 3858_5    | PPAC                             | Low molecular weight phosphotyrosine protein phosphatase          | P24666  | ACP1     | chr2:264140     | Inverse variance weighted | 7  | -0.013 | 0.031 | 6.725E-01 | 0.996 | cis | Severe COVID-19 |
| 9339_204  | FKBP2                            | Peptidyl-prolyl cis-trans isomerase FKBP2                         | P26885  | FKBP2    | chr11:64241003  | Wald ratio                | 1  | 0.127  | 0.300 | 6.729E-01 | 0.996 | cis | Severe COVID-19 |
| 6990_44   | SDF2L                            | Stromal cell-derived factor 2-like protein 1                      | Q9HCN8  | SDF2L1   | chr22:21642302  | Wald ratio                | 1  | 0.112  | 0.267 | 6.732E-01 | 0.996 | cis | Severe COVID-19 |
| 13552_7   | SWP70                            | Switch-associated protein 70                                      | Q9UH65  | SWAP70   | chr11:9664077   | Inverse variance weighted | 5  | -0.014 | 0.034 | 6.734E-01 | 0.996 | cis | Severe COVID-19 |
| 7156_2    | FUT10                            | Alpha-(1,3)-fucosyltransferase 10                                 | O6P4F1  | FUT10    | chr8:33473146   | Inverse variance weighted | 7  | 0.014  | 0.033 | 6.737E-01 | 0.996 | cis | Severe COVID-19 |
| 18896_23  | H6ST3                            | Heparan sulfate 6-O-sulfotransferase 3                            | Q8IZP7  | HSE6T3   | chr13:96090107  | Wald ratio                | 1  | 0.065  | 0.156 | 6.742E-01 | 0.996 | cis | Severe COVID-19 |
| 16610_13  | LRP10                            | Low-density lipoprotein receptor-related protein 10               | Q7Z4F1  | LRP10    | chr14:22871740  | Inverse variance weighted | 3  | -0.056 | 0.133 | 6.742E-01 | 0.996 | cis | Severe COVID-19 |
| 13930_3   | ABC3G                            | DNA c-G>du-editing enzyme APOBEC-3G                               | Q9HC16  | APOBEC3G | chr22:39077067  | Inverse variance weighted | 2  | 0.048  | 0.113 | 6.749E-01 | 0.996 | cis | Severe COVID-19 |
| 16825_20  | ATX3                             | Ataxin-3                                                          | P54252  | ATXN3    | chr14:92106621  | Inverse variance weighted | 4  | -0.024 | 0.057 | 6.756E-01 | 0.996 | cis | Severe COVID-19 |
| 13427_66  | MA1C1                            | Mannosyl-oligosaccharide 1,2-alpha-mannosidase IC                 | Q9NR34  | MAN1C1   | chr1:25616791   | Inverse variance weighted | 3  | -0.041 | 0.099 | 6.756E-01 | 0.996 | cis | Severe COVID-19 |
| 9867_23   | F16P2                            | Fructose-1,6-bisphosphatase isozyme 2                             | O00757  | FBP2     | chr9:94593824   | Wald ratio                | 1  | 0.091  | 0.219 | 6.761E-01 | 0.996 | cis | Severe COVID-19 |
| 4563_61   | PLCG1                            | 1-phosphatidylinositol 4,5-bisphosphate phosphodiesterase gamma-1 | P19174  | PLCG1    | chr20:41136960  | Wald ratio                | 1  | 0.110  | 0.262 | 6.762E-01 | 0.996 | cis | Severe COVID-19 |
| 16853_5   | NRK1                             | Nicotinamide riboside kinase 1                                    | Q9NWW6  | NMRK1    | chr9:75088217   | Inverse variance weighted | 2  | 0.051  | 0.122 | 6.767E-01 | 0.996 | cis | Severe COVID-19 |
| 3719_2    | p27Kip1                          | Cyclin-dependent kinase inhibitor 1B                              | P46527  | CDKN1B   | chr12:12685498  | Wald ratio                | 1  | -0.105 | 0.252 | 6.770E-01 | 0.996 | cis | Severe COVID-19 |
| 8697_38   | Glypican 1                       | Glypican-1                                                        | P35052  | GPC1     | chr2:240435663  | Inverse variance weighted | 6  | 0.015  | 0.037 | 6.772E-01 | 0.996 | cis | Severe COVID-19 |
| 13692_154 | WISP-1                           | WNT1-inducible-signaling pathway protein 1                        | Q95388  | CN4      | chr8:133191039  | Inverse variance weighted | 8  | 0.013  | 0.030 | 6.808E-01 | 0.996 | cis | Severe COVID-19 |
| 15494_11  | FGFP1                            | Fibroblast growth factor-binding protein 1                        | Q14512  | FGFBP1   | chr4:15938740   | Wald ratio                | 1  | 0.114  | 0.278 | 6.810E-01 | 0.996 | cis | Severe COVID-19 |
| 3499_77   | IL-17B                           | Interleukin-17B                                                   | Q9UHF5  | IL17B    | chr5:149404202  | Wald ratio                | 1  | -0.086 | 0.209 | 6.814E-01 | 0.996 | cis | Severe COVID-19 |
| 18338_26  | IDH                              | Isocitrate dehydrogenase [NADP] cytoplasmic                       | O75874  | IDH1     | chr2:208266074  | Inverse variance weighted | 3  | -0.035 | 0.085 | 6.815E-01 | 0.996 | cis | Severe COVID-19 |
| 9883_29   | Glyoxalase I                     | Lactoylglutathione lyase                                          | Q04760  | GLO1     | chr6:38703145   | Inverse variance weighted | 3  | -0.063 | 0.154 | 6.816E-01 | 0.996 | cis | Severe COVID-19 |
| 11117_2   | SPT20                            | Spermatogenesis-associated protein 20                             | Q8TB22  | SPATA20  | chr17:50543058  | Inverse variance weighted | 4  | -0.025 | 0.060 | 6.830E-01 | 0.996 | cis | Severe COVID-19 |
| 3449_58   | Kallistatin                      | Kallistatin                                                       | P29622  | SERPINA4 | chr14:94561442  | Inverse variance weighted | 7  | -0.024 | 0.059 | 6.835E-01 | 0.996 | cis | Severe COVID-19 |
| 3336_50   | TFPI                             | Tissue factor pathway inhibitor                                   | P10646  | TFPI     | chr2:187565760  | Wald ratio                | 1  | -0.073 | 0.178 | 6.837E-01 | 0.996 | cis | Severe COVID-19 |
| 11390_24  | Carbonic Anhydrase VIII          | Carbonic anhydrase-related protein                                | P35219  | CA8      | chr8:60281400   | Inverse variance weighted | 6  | -0.015 | 0.038 | 6.845E-01 | 0.996 | cis | Severe COVID-19 |
| 10818_36  | ASM                              | Sphingomyelin phosphodiesterase                                   | P17405  | SMPD1    | chr11:6390440   | Inverse variance weighted | 5  | 0.017  | 0.043 | 6.847E-01 | 0.996 | cis | Severe COVID-19 |
| 2900_53   | HCC-1                            | C-C motif chemokine 14                                            | IL16627 | CCL14    | chr17:35987004  | Inverse variance weighted | 4  | 0.045  | 0.111 | 6.854E-01 | 0.996 | cis | Severe COVID-19 |
| 7163_26   | lacritin                         | Extracellular glycoprotein lacritin                               | Q9G2Z8  | LACRT    | chr12:54634895  | Wald ratio                | 1  | 0.153  | 0.377 | 6.854E-01 | 0.996 | cis | Severe COVID-19 |
| 8900_28   | NEO1                             | Neogenin                                                          | Q92859  | NEO1     | chr15:73051710  | Inverse variance weighted | 3  | -0.057 | 0.140 | 6.856E-01 | 0.996 | cis | Severe COVID-19 |
| 14009_65  | TNFAIP3                          | Tumor necrosis factor alpha-induced protein 3                     | P21580  | TNFAIP3  | chr6:137867214  | Wald ratio                | 1  | -0.038 | 0.095 | 6.873E-01 | 0.996 | cis | Severe COVID-19 |
| 14208_3   | RET7                             | Retinoid-binding protein 7                                        | Q96R05  | RBPF     | chr1:9997206    | Inverse variance weighted | 2  | -0.054 | 0.135 | 6.877E-01 | 0.996 | cis | Severe COVID-19 |
| 2946_52   | Factor D                         | Complement factor D                                               | P00746  | CFD      | chr19:859453    | Inverse variance weighted | 6  | -0.028 | 0.069 | 6.880E-01 | 0.996 | cis | Severe COVID-19 |
| 2836_68   | Lipocalin 2                      | Neutrophil gelatinase-associated lipocalin                        | R80188  | LCN2     | chr9:128149071  | Wald ratio                | 1  | -0.089 | 0.221 | 6.882E-01 | 0.996 | cis | Severe COVID-19 |
| 16594_44  | FAIM1                            | Fas apoptotic inhibitory molecule 1                               | Q9NVQ4  | FAIM     | chr3:138608606  | Inverse variance weighted | 7  | -0.020 | 0.049 | 6.891E-01 | 0.996 | cis | Severe COVID-19 |
| 9077_10   | MA1A2                            | Mannosyl-oligosaccharide 1,2-alpha-mannosidase IB                 | O60476  | MAN1A2   | chr1:117367449  | Inverse variance weighted | 4  | -0.035 | 0.088 | 6.899E-01 | 0.996 | cis | Severe COVID-19 |
| 12422_143 | LX15B                            | Arachidonate 15-lipoxygenase B                                    | IL15296 | ALOX15B  | chr17:8039034   | Wald ratio                | 1  | 0.083  | 0.208 | 6.916E-01 | 0.996 | cis | Severe COVID-19 |
| 19194_9   | Histidyl-tRNA synthetase-related | D-tyrosyl-tRNA(Tyr) deacylase 1                                   | Q8TEA8  | DTD1     | chr20:18587942  | Wald ratio                | 1  | 0.030  | 0.077 | 6.917E-01 | 0.996 | cis | Severe COVID-19 |
| 6382_17   | MANBA                            | Beta-mannosidase                                                  | O00462  | MANBA    | chr4:102760994  | Inverse variance weighted | 5  | -0.031 | 0.079 | 6.921E-01 | 0.996 | cis | Severe COVID-19 |
| 11514_196 | CD59                             | CD59 glycoprotein                                                 | P13987  | CD59     | chr11:33736479  | Inverse variance weighted | 3  | -0.058 | 0.148 | 6.940E-01 | 0.996 | cis | Severe COVID-19 |
| 5636_10   | MFAP4                            | Microfibril-associated glycoprotein 4                             | P55083  | MFAP4    | chr17:19387190  | Inverse variance weighted | 2  | 0.029  | 0.075 | 6.940E-01 | 0.996 | cis | Severe COVID-19 |

|           |                                 |                                                                                                   |        |            |                 |                           |    |        |       |           |       |     |                 |
|-----------|---------------------------------|---------------------------------------------------------------------------------------------------|--------|------------|-----------------|---------------------------|----|--------|-------|-----------|-------|-----|-----------------|
| 4984_83   | Esterase D                      | S-formylglutathione hydrolase                                                                     | P10768 | ESD        | chr13:46797420  | Inverse variance weighted | 3  | -0.038 | 0.096 | 6.941E-01 | 0.996 | cis | Severe COVID-19 |
| 12020_39  | PMGE                            | Bisphosphoglycerate mutase                                                                        | P07738 | BPGM       | chr7:134646811  | Wald ratio                | 1  | -0.190 | 0.484 | 6.945E-01 | 0.996 | cis | Severe COVID-19 |
| 15635_4   | SMOC2                           | SPARC-related modular calcium-binding protein 2                                                   | Q9H3U7 | SMOC2      | chr6:168441151  | Inverse variance weighted | 5  | -0.019 | 0.047 | 6.952E-01 | 0.996 | cis | Severe COVID-19 |
| 5703_26   | NOE1                            | Noelin                                                                                            | Q99784 | OLFM1      | chr9:135075422  | Inverse variance weighted | 2  | 0.067  | 0.171 | 6.956E-01 | 0.996 | cis | Severe COVID-19 |
| 12563_2   | TFIP8                           | Tumor necrosis factor alpha-induced protein 8                                                     | O95379 | TNFAIP8    | chr5:119268692  | Inverse variance weighted | 2  | 0.049  | 0.125 | 6.961E-01 | 0.996 | cis | Severe COVID-19 |
| 7926_13   | SPIT3                           | Kunitz-type protease inhibitor 3                                                                  | P49223 | SPINT3     | chr20:45515622  | Inverse variance weighted | 4  | 0.039  | 0.101 | 6.968E-01 | 0.996 | cis | Severe COVID-19 |
| 8992_1    | TMEM2                           | Transmembrane protein 2                                                                           | Q9UHN6 | CEMP2      | chr9:71816690   | Inverse variance weighted | 2  | 0.036  | 0.092 | 6.975E-01 | 0.996 | cis | Severe COVID-19 |
| 3853_56   | MDHC                            | Malate dehydrogenase, cytoplasmic                                                                 | P40925 | MDH1       | chr2:63588609   | Wald ratio                | 1  | -0.085 | 0.218 | 6.978E-01 | 0.996 | cis | Severe COVID-19 |
| 13059_33  | RIFK                            | Riboflavin kinase                                                                                 | Q969G6 | RFK        | chr9:76394517   | Inverse variance weighted | 2  | -0.059 | 0.151 | 6.982E-01 | 0.996 | cis | Severe COVID-19 |
| 2789_26   | MMP-7                           | Matrilysin                                                                                        | P09237 | MMP7       | chr11:102530750 | Inverse variance weighted | 4  | -0.032 | 0.083 | 6.987E-01 | 0.996 | cis | Severe COVID-19 |
| 15363_32  | Apo A-V                         | Apolipoprotein A-V                                                                                | Q6Q788 | APOA5      | chr11:116792420 | Inverse variance weighted | 8  | -0.016 | 0.041 | 7.004E-01 | 0.996 | cis | Severe COVID-19 |
| 4328_2    | BOC                             | Brother of CDO                                                                                    | Q9BWW1 | BOC        | chr3:113211003  | Inverse variance weighted | 5  | -0.024 | 0.063 | 7.006E-01 | 0.996 | cis | Severe COVID-19 |
| 18880_81  | Collagen Type III               | Collagen Type III                                                                                 | P02461 | COL3A1     | chr2:188974373  | Inverse variance weighted | 2  | -0.080 | 0.209 | 7.006E-01 | 0.996 | cis | Severe COVID-19 |
| 5095_21   | KI2L4                           | Killer cell immunoglobulin-like receptor 2DL4                                                     | Q99706 | KIR2DL4    | chr19:54803610  | Inverse variance weighted | 2  | -0.055 | 0.143 | 7.012E-01 | 0.996 | cis | Severe COVID-19 |
| 8766_29   | LIRAS                           | Leukocyte immunoglobulin-like receptor subfamily A member 5                                       | A6N173 | LIRAS      | chr19:54313166  | Wald ratio                | 1  | -0.099 | 0.257 | 7.014E-01 | 0.996 | cis | Severe COVID-19 |
| 7145_1    | ITI13                           | Inter-alpha-trypsin inhibitor heavy chain H3                                                      | Q06033 | ITI13      | chr3:52794768   | Inverse variance weighted | 10 | 0.017  | 0.044 | 7.019E-01 | 0.996 | cis | Severe COVID-19 |
| 5704_74   | Granzyme M                      | Granzyme M                                                                                        | P51124 | GZMM       | chr19:544034    | Inverse variance weighted | 2  | -0.087 | 0.227 | 7.026E-01 | 0.996 | cis | Severe COVID-19 |
| 3855_56   | Peroxioredoxin-1                | Peroxioredoxin-1                                                                                  | Q06830 | PRDX1      | chr1:45542732   | Inverse variance weighted | 2  | -0.049 | 0.128 | 7.029E-01 | 0.996 | cis | Severe COVID-19 |
| 7141_21   | MGTA4                           | Alpha-1,3-mannosyl-glycoprotein 4-beta-N-acetylglucosaminyltransferase B                          | Q9U053 | MGAT4B     | chr5:179806952  | Inverse variance weighted | 4  | -0.016 | 0.042 | 7.053E-01 | 0.996 | cis | Severe COVID-19 |
| 6234_74   | VITRN                           | Vitrin                                                                                            | Q6UX17 | VIT        | chr2:36696690   | Inverse variance weighted | 6  | 0.023  | 0.060 | 7.054E-01 | 0.996 | cis | Severe COVID-19 |
| 7655_11   | N-terminal pro-BNP              | N-terminal pro-BNP                                                                                | P16860 | NPPB       | chr1:11858945   | Inverse variance weighted | 3  | 0.058  | 0.152 | 7.055E-01 | 0.996 | cis | Severe COVID-19 |
| 19267_14  | GLO2                            | Hydroxyacylglutathione hydrolase, mitochondrial                                                   | Q16775 | HAGH       | chr16:1827157   | Wald ratio                | 1  | 0.038  | 0.101 | 7.062E-01 | 0.996 | cis | Severe COVID-19 |
| 17755_5   | UGDH                            | UDP-glucose 6-dehydrogenase                                                                       | O60701 | UGDH       | chr4:39528311   | Inverse variance weighted | 3  | -0.026 | 0.069 | 7.065E-01 | 0.996 | cis | Severe COVID-19 |
| 12329_21  | KS6A1                           | Ribosomal protein S6 kinase alpha-1                                                               | Q15418 | RP56KA1    | chr1:26529761   | Wald ratio                | 1  | 0.058  | 0.153 | 7.070E-01 | 0.996 | cis | Severe COVID-19 |
| 11480_1   | Aldehyde dehydrogenase, class 3 | Aldehyde dehydrogenase, dimeric NADP-preferring                                                   | P30838 | ALDH3A1    | chr17:19748943  | Wald ratio                | 1  | -0.047 | 0.125 | 7.085E-01 | 0.996 | cis | Severe COVID-19 |
| 16763_11  | LECT2                           | Leukocyte cell-derived chemotaxin-2                                                               | Q14960 | LECT2      | chr5:135954983  | Inverse variance weighted | 8  | 0.019  | 0.051 | 7.100E-01 | 0.996 | cis | Severe COVID-19 |
| 13112_179 | FSTL1                           | Follistatin-related protein 1                                                                     | Q12841 | FSTL1      | chr3:120450993  | Inverse variance weighted | 2  | 0.041  | 0.109 | 7.100E-01 | 0.996 | cis | Severe COVID-19 |
| 5124_69   | sICAM-5                         | Intercellular adhesion molecule 5                                                                 | Q9UMF0 | ICAM5      | chr19:10289952  | Inverse variance weighted | 4  | -0.106 | 0.286 | 7.116E-01 | 0.996 | cis | Severe COVID-19 |
| 5671_1    | Chymotrypsin                    | Chymotrypsinogen B                                                                                | P17538 | CTRB1      | chr16:75218988  | Inverse variance weighted | 5  | -0.036 | 0.097 | 7.124E-01 | 0.996 | cis | Severe COVID-19 |
| 9216_100  | PLXB2                           | Plexin-B2                                                                                         | O15031 | PLXNB2     | chr22:50307646  | Inverse variance weighted | 4  | -0.021 | 0.057 | 7.133E-01 | 0.996 | cis | Severe COVID-19 |
| 11104_13  | YKL-40                          | Chitinase-3-like protein 1                                                                        | P36222 | CHI3L1     | chr1:203186704  | Inverse variance weighted | 7  | 0.011  | 0.031 | 7.145E-01 | 0.996 | cis | Severe COVID-19 |
| 18216_22  | IL-11 RA                        | Interleukin-11 receptor subunit alpha                                                             | Q14626 | IL11RA     | chr9:34652162   | Inverse variance weighted | 3  | -0.032 | 0.088 | 7.155E-01 | 0.996 | cis | Severe COVID-19 |
| 6485_59   | IGLL1                           | Immunoglobulin lambda-like polypeptide 1                                                          | P15814 | IGLL1      | chr22:23580302  | Inverse variance weighted | 4  | 0.018  | 0.050 | 7.155E-01 | 0.996 | cis | Severe COVID-19 |
| 18432_32  | RALB                            | Ras-related protein Ral-B                                                                         | P11234 | RALB       | chr2:120240064  | Wald ratio                | 1  | 0.034  | 0.093 | 7.157E-01 | 0.996 | cis | Severe COVID-19 |
| 17702_53  | UGT 1A1                         | UDP-glucuronosyltransferase 1-1                                                                   | P22309 | UGT1A1     | chr2:233760270  | Inverse variance weighted | 2  | 0.037  | 0.103 | 7.161E-01 | 0.996 | cis | Severe COVID-19 |
| 15326_64  | GBP1                            | Guanylate-binding protein 1                                                                       | P32455 | GBP1       | chr1:89065360   | Inverse variance weighted | 2  | 0.033  | 0.092 | 7.164E-01 | 0.996 | cis | Severe COVID-19 |
| 17345_12  | ZADH2                           | Prostaglandin reductase 3                                                                         | Q8NAQ0 | PTGR3      | chr18:75209139  | Wald ratio                | 1  | -0.055 | 0.151 | 7.169E-01 | 0.996 | cis | Severe COVID-19 |
| 5632_6    | CRAC1                           | Cartilage acidic protein 1                                                                        | Q9NQ79 | CRAC1      | chr10:98030828  | Inverse variance weighted | 9  | -0.014 | 0.040 | 7.170E-01 | 0.996 | cis | Severe COVID-19 |
| 12764_3   | ELMO1                           | Engulfment and cell motility protein 1                                                            | Q92556 | ELMO1      | chr7:37449223   | Inverse variance weighted | 3  | 0.047  | 0.129 | 7.176E-01 | 0.996 | cis | Severe COVID-19 |
| 17746_77  | FIS1                            | Mitochondrial fission 1 protein                                                                   | Q9Y3D6 | FIS1       | chr7:101252316  | Inverse variance weighted | 2  | 0.152  | 0.420 | 7.179E-01 | 0.996 | cis | Severe COVID-19 |
| 11540_37  | FOXO3A                          | Forkhead box protein O3                                                                           | O43524 | FOXO3      | chr6:108559835  | Wald ratio                | 1  | 0.106  | 0.294 | 7.185E-01 | 0.996 | cis | Severe COVID-19 |
| 3184_25   | Coagulation Factor VII          | Coagulation factor VII                                                                            | P08709 | F7         | chr13:113105788 | Inverse variance weighted | 7  | -0.012 | 0.033 | 7.203E-01 | 0.996 | cis | Severe COVID-19 |
| 5005_4    | MK12                            | Mitogen-activated protein kinase 12                                                               | P53778 | MAPK12     | chr2:50261716   | Inverse variance weighted | 2  | 0.037  | 0.103 | 7.210E-01 | 0.996 | cis | Severe COVID-19 |
| 8465_52   | Cathepsin H                     | Cathepsin H                                                                                       | P09668 | CTSH       | chr15:78949574  | Inverse variance weighted | 10 | -0.011 | 0.032 | 7.215E-01 | 0.996 | cis | Severe COVID-19 |
| 4278_14   | Protein disulfide-isomerase     | Protein disulfide-isomerase                                                                       | P07237 | P4H8       | chr17:81860856  | Wald ratio                | 1  | -0.061 | 0.173 | 7.216E-01 | 0.996 | cis | Severe COVID-19 |
| 16057_6   | IGF-II receptor                 | Cation-independent mannose-6-phosphate receptor                                                   | P11717 | IGF2R      | chr6:159969082  | Inverse variance weighted | 6  | 0.022  | 0.063 | 7.223E-01 | 0.996 | cis | Severe COVID-19 |
| 14094_29  | HB-EGF                          | Heparin-binding EGF-like growth factor                                                            | Q99075 | HBEGF      | chr5:140346603  | Wald ratio                | 1  | 0.130  | 0.366 | 7.223E-01 | 0.996 | cis | Severe COVID-19 |
| 13740_51  | sFRP-3                          | Secreted frizzled-related protein 3                                                               | Q92765 | FRZB       | chr2:182866637  | Inverse variance weighted | 8  | -0.011 | 0.032 | 7.226E-01 | 0.996 | cis | Severe COVID-19 |
| 15468_14  | FHR1                            | Complement factor H-related protein 1                                                             | Q03591 | CFHR1      | chr1:196819731  | Inverse variance weighted | 6  | -0.023 | 0.064 | 7.229E-01 | 0.996 | cis | Severe COVID-19 |
| 19637_9   | CRH                             | Corticotiberin                                                                                    | P06850 | CRH        | chr8:66178464   | Wald ratio                | 1  | 0.087  | 0.245 | 7.230E-01 | 0.996 | cis | Severe COVID-19 |
| 18319_7   | ODFX                            | Pyruvate dehydrogenase protein X component, mitochondrial                                         | O00330 | PDHX       | chr11:34915829  | Inverse variance weighted | 2  | -0.117 | 0.330 | 7.235E-01 | 0.996 | cis | Severe COVID-19 |
| 3622_33   | LGMN                            | Legumain                                                                                          | Q99538 | LGMN       | chr14:92748679  | Inverse variance weighted | 3  | 0.046  | 0.131 | 7.239E-01 | 0.996 | cis | Severe COVID-19 |
| 16304_6   | LGR4                            | Leucine-rich repeat-containing G-protein coupled receptor 4                                       | Q9BXB1 | LGR4       | chr11:27472790  | Inverse variance weighted | 2  | -0.049 | 0.138 | 7.239E-01 | 0.996 | cis | Severe COVID-19 |
| 4568_17   | SLIK5                           | SLIT and NTRK-like protein 5                                                                      | O94991 | SLITRK5    | chr13:87671371  | Inverse variance weighted | 4  | 0.041  | 0.116 | 7.247E-01 | 0.996 | cis | Severe COVID-19 |
| 4960_72   | annexin I                       | Annexin A1                                                                                        | P04083 | ANXA1      | chr9:73151865   | Wald ratio                | 1  | -0.040 | 0.115 | 7.258E-01 | 0.996 | cis | Severe COVID-19 |
| 12687_2   | DECR                            | 2,4-dienoyl-CoA reductase, mitochondrial                                                          | Q16698 | DECR1      | chr8:90001405   | Inverse variance weighted | 2  | -0.070 | 0.201 | 7.259E-01 | 0.996 | cis | Severe COVID-19 |
| 9021_1    | TIM-1                           | Hepatitis A virus cellular receptor 1                                                             | Q96D42 | HAVCR1     | chr5:157069396  | Inverse variance weighted | 6  | -0.016 | 0.047 | 7.262E-01 | 0.996 | cis | Severe COVID-19 |
| 12556_7   | UBE2C                           | Ubiquitin-conjugating enzyme E2 C                                                                 | O00762 | UBE2C      | chr20:45812576  | Inverse variance weighted | 2  | -0.048 | 0.137 | 7.272E-01 | 0.996 | cis | Severe COVID-19 |
| 2436_49   | CXCL16, soluble                 | C-X-C motif chemokine 16                                                                          | Q9H2A7 | CXCL16     | chr17:4739928   | Inverse variance weighted | 3  | -0.036 | 0.102 | 7.281E-01 | 0.996 | cis | Severe COVID-19 |
| 16872_248 | MAAI                            | Maleylacetoacetate isomerase                                                                      | O43708 | GSLT2      | chr14:77320996  | Inverse variance weighted | 8  | -0.008 | 0.023 | 7.292E-01 | 0.996 | cis | Severe COVID-19 |
| 9826_135  | Fragile histidine triad protein | Bis(5'-adenosyl)-triphosphatase                                                                   | P49789 | FHIT       | chr3:61251459   | Inverse variance weighted | 2  | -0.103 | 0.297 | 7.295E-01 | 0.996 | cis | Severe COVID-19 |
| 3795_6    | ADAM 9                          | Disintegrin and metalloproteinase domain-containing protein 9                                     | Q13443 | ADAM9      | chr8:38996754   | Wald ratio                | 1  | 0.126  | 0.367 | 7.305E-01 | 0.996 | cis | Severe COVID-19 |
| 6375_75   | XXLT1                           | Xyloside xylosyltransferase 1                                                                     | Q8NB86 | XXLT1      | chr3:195271159  | Inverse variance weighted | 2  | 0.023  | 0.068 | 7.306E-01 | 0.996 | cis | Severe COVID-19 |
| 17813_21  | BPHL                            | Valacyclovir hydrolase                                                                            | Q86WA6 | BPHL       | chr6:3118374    | Inverse variance weighted | 2  | -0.110 | 0.319 | 7.310E-01 | 0.996 | cis | Severe COVID-19 |
| 7083_74   | MATN4                           | Matrilin-4                                                                                        | O95460 | MATN4      | chr20:45308529  | Inverse variance weighted | 3  | 0.033  | 0.096 | 7.317E-01 | 0.996 | cis | Severe COVID-19 |
| 18215_5   | THG1                            | Probable tRNA(His) guanylyltransferase                                                            | Q9NWV6 | THG1L      | chr5:157731420  | Inverse variance weighted | 3  | -0.013 | 0.039 | 7.318E-01 | 0.996 | cis | Severe COVID-19 |
| 17377_1   | Aldose reductase-like C3        | Aldo-keto reductase family 1 member C3                                                            | P42330 | AKR1C3     | chr10:5035354   | Inverse variance weighted | 4  | 0.046  | 0.135 | 7.319E-01 | 0.996 | cis | Severe COVID-19 |
| 8327_26   | DPEP2                           | Dipeptidase 2                                                                                     | Q9H4A9 | DPEP2      | chr16:68000586  | Inverse variance weighted | 2  | 0.037  | 0.107 | 7.324E-01 | 0.996 | cis | Severe COVID-19 |
| 15343_337 | Kininogen, HMW, Two Chain       | Kininogen, HMW, Two Chain                                                                         | P01042 | KNG1       | chr3:186717348  | Inverse variance weighted | 3  | -0.089 | 0.260 | 7.331E-01 | 0.996 | cis | Severe COVID-19 |
| 18878_15  | GREM1                           | Gremlin-1                                                                                         | O60565 | GREM1      | chr15:32718004  | Inverse variance weighted | 8  | -0.009 | 0.027 | 7.333E-01 | 0.996 | cis | Severe COVID-19 |
| 5108_72   | Notch-3                         | Neurogenic locus notch homolog protein 3                                                          | Q9UM47 | NOTCH3     | chr19:15200995  | Wald ratio                | 1  | 0.060  | 0.175 | 7.336E-01 | 0.996 | cis | Severe COVID-19 |
| 6965_19   | CNTP2                           | Contactin-associated protein-like 2                                                               | Q9UHC6 | CNTNAP2    | chr7:146116002  | Inverse variance weighted | 5  | -0.013 | 0.039 | 7.351E-01 | 0.996 | cis | Severe COVID-19 |
| 6620_82   | LIGO1                           | Leucine-rich repeat and immunoglobulin-like domain-containing nogo receptor-interacting protein 1 | Q96FE5 | LINGO1     | chr5:77820900   | Inverse variance weighted | 2  | 0.106  | 0.313 | 7.354E-01 | 0.996 | cis | Severe COVID-19 |
| 2381_52   | C5                              | Complement C5                                                                                     | P01031 | C5         | chr9:121075195  | Inverse variance weighted | 2  | 0.041  | 0.123 | 7.370E-01 | 0.996 | cis | Severe COVID-19 |
| 5737_61   | SEM4D                           | Semaphorin-4D                                                                                     | Q92854 | SEMA4D     | chr9:89498130   | Inverse variance weighted | 6  | -0.018 | 0.054 | 7.375E-01 | 0.996 | cis | Severe COVID-19 |
| 5691_2    | CLRD2                           | Cysteine-rich secretory protein LCCL domain-containing 2                                          | Q9H088 | CRISPD2    | chr16:84819985  | Inverse variance weighted | 6  | 0.027  | 0.080 | 7.377E-01 | 0.996 | cis | Severe COVID-19 |
| 7228_2    | SIA7F                           | Alpha-N-acetylglactosaminide alpha-2,6-sialyltransferase 6                                        | Q969X2 | STGGALNAC6 | chr9:127905408  | Inverse variance weighted | 2  | -0.083 | 0.247 | 7.383E-01 | 0.996 | cis | Severe COVID-19 |
| 6909_40   | MGAT2                           | Alpha-1,6-mannosyl-glycoprotein 2-beta-N-acetylglucosaminyltransferase                            | Q10469 | MGAT2      | chr14:49620799  | Wald ratio                | 1  | -0.035 | 0.106 | 7.388E-01 | 0.996 | cis | Severe COVID-19 |

|           |                               |                                                                                            |        |          |                 |                           |    |        |       |           |       |     |                 |
|-----------|-------------------------------|--------------------------------------------------------------------------------------------|--------|----------|-----------------|---------------------------|----|--------|-------|-----------|-------|-----|-----------------|
| 16055_3   | complement factor H-related 5 | Complement factor H-related protein 5                                                      | Q9BXR6 | CFHR5    | chr1:196975010  | Inverse variance weighted | 5  | -0.020 | 0.061 | 7.398E-01 | 0.996 | cis | Severe COVID-19 |
| 11424_4   | FAAA                          | Fumarylacetoacetase                                                                        | P16930 | FAH      | chr15:80152490  | Inverse variance weighted | 5  | -0.010 | 0.032 | 7.413E-01 | 0.996 | cis | Severe COVID-19 |
| 5036_50   | TSG-6                         | Tumor necrosis factor-inducible gene 6 protein                                             | P98066 | TNFAIP6  | chr2:151357592  | Inverse variance weighted | 9  | -0.012 | 0.037 | 7.431E-01 | 0.996 | cis | Severe COVID-19 |
| 3343_1    | Aminoacylase-1                | Aminoacylase-1                                                                             | Q03154 | ACY1     | chr3:51983340   | Wald ratio                | 1  | -0.026 | 0.079 | 7.436E-01 | 0.996 | cis | Severe COVID-19 |
| 5631_83   | MOT1                          | Promotilin                                                                                 | P12872 | MLN      | chr6:33804003   | Inverse variance weighted | 6  | 0.015  | 0.047 | 7.445E-01 | 0.996 | cis | Severe COVID-19 |
| 3028_36   | Ck-b-8-1                      | Ck-beta-8-1                                                                                | P55773 | CCL23    | chr17:36017972  | Inverse variance weighted | 4  | -0.049 | 0.151 | 7.447E-01 | 0.996 | cis | Severe COVID-19 |
| 15440_57  | NEC2                          | Neuroendocrine convertase 2                                                                | P16519 | PCSK2    | chr20:17226107  | Wald ratio                | 1  | -0.058 | 0.178 | 7.456E-01 | 0.996 | cis | Severe COVID-19 |
| 3077_66   | Coagulation Factor Xa         | Coagulation factor Xa                                                                      | P00742 | F10      | chr13:113122799 | Inverse variance weighted | 2  | -0.072 | 0.222 | 7.459E-01 | 0.996 | cis | Severe COVID-19 |
| 18343_10  | DECR2                         | Peroxisomal 2,4-dienoyl-CoA reductase                                                      | Q9NUJ1 | DECR2    | chr16:401858    | Inverse variance weighted | 5  | 0.015  | 0.046 | 7.465E-01 | 0.996 | cis | Severe COVID-19 |
| 18315_38  | RTP4                          | Receptor transporting protein 4                                                            | Q96DX8 | RTP4     | chr3:187368385  | Inverse variance weighted | 3  | 0.014  | 0.044 | 7.467E-01 | 0.996 | cis | Severe COVID-19 |
| 19563_3   | SEZ6L                         | Seizure 6-like protein                                                                     | Q9BYH1 | SEZ6L    | chr22:26169462  | Inverse variance weighted | 3  | 0.043  | 0.133 | 7.469E-01 | 0.996 | cis | Severe COVID-19 |
| 9816_37   | ISOC1                         | Ischorismatase domain-containing protein 1                                                 | Q96CN7 | ISOC1    | chr5:129094749  | Inverse variance weighted | 2  | 0.051  | 0.158 | 7.473E-01 | 0.996 | cis | Severe COVID-19 |
| 5480_49   | RANTES                        | C-C motif chemokine 5                                                                      | P13501 | CCL5     | chr17:35880793  | Inverse variance weighted | 2  | -0.034 | 0.104 | 7.475E-01 | 0.996 | cis | Severe COVID-19 |
| 15602_43  | IL-6 sRa                      | Interleukin-6 receptor subunit alpha                                                       | P08887 | IL6R     | chr1:154405193  | Inverse variance weighted | 6  | -0.019 | 0.058 | 7.475E-01 | 0.996 | cis | Severe COVID-19 |
| 15336_7   | SELM                          | Selenoprotein M                                                                            | Q8WWX9 | SELENOM  | chr22:31120069  | Wald ratio                | 1  | 0.091  | 0.284 | 7.483E-01 | 0.996 | cis | Severe COVID-19 |
| 4559_64   | KYNU                          | Kynureninase                                                                               | Q16719 | KYNU     | chr2:142877657  | Inverse variance weighted | 4  | -0.029 | 0.090 | 7.484E-01 | 0.996 | cis | Severe COVID-19 |
| 11441_11  | PYGL                          | Glycogen phosphorylase, liver form                                                         | P06737 | PYGL     | chr14:50944483  | Inverse variance weighted | 2  | 0.039  | 0.123 | 7.490E-01 | 0.996 | cis | Severe COVID-19 |
| 10569_28  | MFAP2                         | Microfibrillar-associated protein 2                                                        | P55001 | MFAP2    | chr1:16980632   | Inverse variance weighted | 3  | 0.064  | 0.201 | 7.491E-01 | 0.996 | cis | Severe COVID-19 |
| 9204_33   | Corticotropin-lipotropin      | Pro-opiomelanocortin                                                                       | P01189 | POMC     | chr2:25168903   | Inverse variance weighted | 3  | -0.045 | 0.141 | 7.493E-01 | 0.996 | cis | Severe COVID-19 |
| 15324_58  | Ferritin light chain          | Ferritin light chain                                                                       | P02792 | FTL      | chr19:48965309  | Wald ratio                | 1  | -0.094 | 0.293 | 7.495E-01 | 0.996 | cis | Severe COVID-19 |
| 6920_1    | GFRAL                         | GDNF family receptor alpha-like                                                            | Q6UXV0 | GFRAL    | chr6:55327469   | Inverse variance weighted | 3  | -0.027 | 0.084 | 7.499E-01 | 0.996 | cis | Severe COVID-19 |
| 10490_3   | RPN1:CD                       | Dolichyl-diphosphooligosaccharide-protein glycosyltransferase subunit 1:Cytoplasmic domain | P04843 | RPN1     | chr3:128681075  | Wald ratio                | 1  | 0.030  | 0.094 | 7.508E-01 | 0.996 | cis | Severe COVID-19 |
| 16070_7   | WIF-1                         | Wnt inhibitory factor 1                                                                    | Q9Y5W5 | WIF1     | chr12:65121305  | Wald ratio                | 1  | -0.079 | 0.250 | 7.518E-01 | 0.996 | cis | Severe COVID-19 |
| 18172_71  | ASF1A                         | Histone chaperone ASF1A                                                                    | Q9Y294 | ASF1A    | chr6:118894152  | Wald ratio                | 1  | 0.044  | 0.141 | 7.528E-01 | 0.996 | cis | Severe COVID-19 |
| 13998_26  | PUR1A                         | Adenylosuccinate synthetase isozyme 1                                                      | Q8N142 | ADSS1    | chr14:104724229 | Inverse variance weighted | 3  | -0.026 | 0.084 | 7.528E-01 | 0.996 | cis | Severe COVID-19 |
| 15506_34  | LRP12                         | Low-density lipoprotein receptor-related protein 12                                        | Q9Y561 | LRP12    | chr8:104589258  | Inverse variance weighted | 2  | 0.067  | 0.215 | 7.533E-01 | 0.996 | cis | Severe COVID-19 |
| 15509_2   | NAG                           | Alpha-N-acetylglucosaminidase                                                              | P54802 | NAGLU    | chr17:42536241  | Inverse variance weighted | 6  | 0.010  | 0.032 | 7.540E-01 | 0.996 | cis | Severe COVID-19 |
| 16309_30  | Soggy-1                       | Dickkopf-like protein 1                                                                    | Q9UK85 | DKK1     | chr19:49361783  | Wald ratio                | 1  | 0.119  | 0.381 | 7.554E-01 | 0.996 | cis | Severe COVID-19 |
| 10366_11  | PDGFRA                        | Platelet-derived growth factor receptor alpha                                              | P16234 | PDGFRA   | chr4:54229280   | Inverse variance weighted | 3  | 0.036  | 0.115 | 7.557E-01 | 0.996 | cis | Severe COVID-19 |
| 14047_78  | BDNF                          | Brain-derived neurotrophic factor                                                          | P23560 | BDNF     | chr11:27722058  | Inverse variance weighted | 2  | 0.091  | 0.293 | 7.560E-01 | 0.996 | cis | Severe COVID-19 |
| 3403_1    | TPSB2                         | Tryptase beta-2                                                                            | P20231 | TPSB2    | chr16:1230184   | Inverse variance weighted | 8  | -0.011 | 0.035 | 7.562E-01 | 0.996 | cis | Severe COVID-19 |
| 15364_101 | Apo C-I                       | Apolipoprotein C-I                                                                         | P02654 | APOC1    | chr19:44914247  | Inverse variance weighted | 5  | 0.034  | 0.109 | 7.575E-01 | 0.996 | cis | Severe COVID-19 |
| 13719_19  | PAK4                          | Serine/threonine-protein kinase PAK 4                                                      | O96013 | PAK4     | chr19:39125770  | Wald ratio                | 1  | 0.097  | 0.315 | 7.590E-01 | 0.996 | cis | Severe COVID-19 |
| 12549_33  | PTGD2                         | Hematopoietic prostaglandin D synthase                                                     | O60760 | HPGD5    | chr4:94342876   | Inverse variance weighted | 9  | -0.011 | 0.035 | 7.591E-01 | 0.996 | cis | Severe COVID-19 |
| 2816_50   | BCAM                          | Basal Cell Adhesion Molecule                                                               | P50895 | BCAM     | chr19:44809071  | Inverse variance weighted | 5  | -0.013 | 0.043 | 7.606E-01 | 0.996 | cis | Severe COVID-19 |
| 15570_99  | Complement receptor type 2    | Complement receptor type 2                                                                 | P20023 | CR2      | chr1:207453024  | Inverse variance weighted | 3  | 0.032  | 0.105 | 7.616E-01 | 0.996 | cis | Severe COVID-19 |
| 5459_33   | CYTN                          | Cystatin-SN                                                                                | P01037 | CST1     | chr20:23751268  | Inverse variance weighted | 5  | 0.033  | 0.109 | 7.626E-01 | 0.996 | cis | Severe COVID-19 |
| 6448_36   | Sema 4                        | Semaphorin-3C                                                                              | Q99985 | SEMA3C   | chr7:80922359   | Inverse variance weighted | 2  | 0.040  | 0.133 | 7.644E-01 | 0.996 | cis | Severe COVID-19 |
| 7933_75   | ADA22                         | Disintegrin and metalloproteinase domain-containing protein 22                             | Q9P0K1 | ADAM22   | chr7:87934143   | Inverse variance weighted | 4  | -0.014 | 0.047 | 7.648E-01 | 0.996 | cis | Severe COVID-19 |
| 4469_78   | ST456                         | Carbohydrate sulfotransferase 15                                                           | Q7LFX5 | CHST15   | chr10:124093598 | Inverse variance weighted | 2  | 0.039  | 0.131 | 7.654E-01 | 0.996 | cis | Severe COVID-19 |
| 2944_66   | DAN                           | Neuroblastoma suppressor of tumorigenicity 1                                               | P41271 | NBL1     | chr1:19596979   | Wald ratio                | 1  | -0.110 | 0.369 | 7.659E-01 | 0.996 | cis | Severe COVID-19 |
| 5638_23   | GT251                         | Procollagen galactosyltransferase 1                                                        | Q8NBJ5 | COLGALT1 | chr19:17555649  | Inverse variance weighted | 3  | -0.030 | 0.101 | 7.668E-01 | 0.996 | cis | Severe COVID-19 |
| 6470_19   | fibulin 1                     | Fibulin-1                                                                                  | P23142 | FBLN1    | chr22:45502238  | Inverse variance weighted | 3  | -0.025 | 0.084 | 7.671E-01 | 0.996 | cis | Severe COVID-19 |
| 19558_10  | LRP4                          | Low-density lipoprotein receptor-related protein 4                                         | O75096 | LRP4     | chr11:46918642  | Inverse variance weighted | 6  | 0.018  | 0.062 | 7.672E-01 | 0.996 | cis | Severe COVID-19 |
| 17761_2   | NUDT5                         | ADP-sugar pyrophosphatase                                                                  | Q9UK99 | NUDT5    | chr10:12196144  | Wald ratio                | 1  | -0.058 | 0.196 | 7.681E-01 | 0.996 | cis | Severe COVID-19 |
| 16890_37  | ATL1                          | ADAMTS-like protein 1                                                                      | Q8N6G6 | ADAMTSL1 | chr9:17906563   | Inverse variance weighted | 6  | 0.019  | 0.063 | 7.694E-01 | 0.996 | cis | Severe COVID-19 |
| 18876_77  | CHST4                         | Carbohydrate sulfotransferase 4                                                            | Q8NC55 | CHST4    | chr16:71525233  | Wald ratio                | 1  | 0.120  | 0.410 | 7.700E-01 | 0.996 | cis | Severe COVID-19 |
| 4459_68   | PCSK7                         | Proprotein convertase subtilisin/kexin type 7                                              | Q16549 | PCSK7    | chr11:117232525 | Inverse variance weighted | 10 | 0.010  | 0.033 | 7.710E-01 | 0.996 | cis | Severe COVID-19 |
| 17456_53  | GOLM1                         | Golgi membrane protein 1                                                                   | Q8NBJ4 | GOLM1    | chr9:86100173   | Inverse variance weighted | 6  | 0.028  | 0.096 | 7.715E-01 | 0.996 | cis | Severe COVID-19 |
| 11212_7   | TXND5                         | Thioredoxin domain-containing protein 5                                                    | Q8NB59 | TXND5C   | chr6:7910788    | Inverse variance weighted | 6  | -0.016 | 0.055 | 7.723E-01 | 0.996 | cis | Severe COVID-19 |
| 12635_9   | TRDMT                         | tRNA (cytosine(38)-C(5))-methyltransferase                                                 | O14717 | TRDMT1   | chr10:17202054  | Inverse variance weighted | 4  | -0.022 | 0.076 | 7.726E-01 | 0.996 | cis | Severe COVID-19 |
| 12594_5   | GRAN                          | Grancalcin                                                                                 | P28676 | GCA      | chr2:162318840  | Inverse variance weighted | 2  | 0.018  | 0.061 | 7.733E-01 | 0.996 | cis | Severe COVID-19 |
| 2849_49   | AIF1                          | Allograft inflammatory factor 1                                                            | P55008 | AIF1     | chr6:31615217   | Inverse variance weighted | 2  | 0.108  | 0.377 | 7.734E-01 | 0.996 | cis | Severe COVID-19 |
| 7551_33   | LRC32                         | Leucine-rich repeat-containing protein 32                                                  | Q14392 | LRR32    | chr11:76670747  | Wald ratio                | 1  | -0.067 | 0.233 | 7.743E-01 | 0.996 | cis | Severe COVID-19 |
| 3495_15   | GCP-2                         | C-X-C motif chemokine 6                                                                    | R80162 | CXCL6    | chr4:73836640   | Inverse variance weighted | 7  | -0.019 | 0.066 | 7.743E-01 | 0.996 | cis | Severe COVID-19 |
| 9901_28   | EGLN1                         | Egl nine homolog 1                                                                         | Q9GZT9 | EGLN1    | chr1:231422287  | Inverse variance weighted | 5  | 0.030  | 0.104 | 7.747E-01 | 0.996 | cis | Severe COVID-19 |
| 13686_2   | IL-5 Ra                       | Interleukin-5 receptor subunit alpha                                                       | Q01344 | IL5RA    | chr3:3126613    | Inverse variance weighted | 6  | 0.011  | 0.038 | 7.759E-01 | 0.996 | cis | Severe COVID-19 |
| 8983_7    | GOLM1                         | Golgi membrane protein 1                                                                   | Q8NBJ4 | GOLM1    | chr9:86100173   | Wald ratio                | 1  | -0.086 | 0.302 | 7.766E-01 | 0.996 | cis | Severe COVID-19 |
| 13982_33  | RG518                         | Regulator of G-protein signaling 18                                                        | Q9NS28 | RG518    | chr1:192158462  | Wald ratio                | 1  | -0.071 | 0.252 | 7.770E-01 | 0.996 | cis | Severe COVID-19 |
| 17751_68  | CRBB1                         | Beta-crystallin B1                                                                         | P53674 | CRYBB1   | chr22:26618027  | Wald ratio                | 1  | -0.023 | 0.081 | 7.775E-01 | 0.996 | cis | Severe COVID-19 |
| 8299_66   | LIR4A                         | Leukocyte immunoglobulin-like receptor subfamily A member 4                                | P59901 | LIR4A    | chr19:54339162  | Inverse variance weighted | 3  | 0.023  | 0.080 | 7.776E-01 | 0.996 | cis | Severe COVID-19 |
| 11428_31  | PDJ1                          | PDZ and LIM domain protein 1                                                               | O00151 | PDJ1M1   | chr10:95291012  | Wald ratio                | 1  | 0.059  | 0.209 | 7.784E-01 | 0.996 | cis | Severe COVID-19 |
| 9848_22   | Cyclin H                      | Cyclin-H                                                                                   | P51946 | CNHN     | chr5:87412930   | Wald ratio                | 1  | 0.050  | 0.178 | 7.786E-01 | 0.996 | cis | Severe COVID-19 |
| 18180_58  | RT411                         | Reticulon-4-interacting protein 1, mitochondrial                                           | Q8WWV3 | RTN4P1   | chr6:106629498  | Wald ratio                | 1  | 0.069  | 0.245 | 7.787E-01 | 0.996 | cis | Severe COVID-19 |
| 6472_40   | GP100                         | Melanocyte protein PMEL                                                                    | P40967 | PMEL     | chr12:55973317  | Inverse variance weighted | 2  | 0.027  | 0.097 | 7.788E-01 | 0.996 | cis | Severe COVID-19 |
| 17138_8   | GST A1-1                      | Glutathione S-transferase A1                                                               | P08263 | GSTA1    | chr6:52803860   | Inverse variance weighted | 6  | 0.012  | 0.045 | 7.798E-01 | 0.996 | cis | Severe COVID-19 |
| 17148_7   | BLVRB                         | Flavin reductase (NADPH)                                                                   | P30043 | BLVRB    | chr19:40465764  | Inverse variance weighted | 3  | -0.019 | 0.070 | 7.801E-01 | 0.996 | cis | Severe COVID-19 |
| 15333_11  | SDF2                          | Stromal cell-derived factor 2                                                              | Q99470 | SDF2     | chr17:28662189  | Wald ratio                | 1  | 0.053  | 0.192 | 7.807E-01 | 0.996 | cis | Severe COVID-19 |
| 12366_16  | CRGD                          | Gamma-crystallin D                                                                         | P07320 | CRYGD    | chr2:208124524  | Wald ratio                | 1  | -0.039 | 0.141 | 7.813E-01 | 0.996 | cis | Severe COVID-19 |
| 3320_49   | IGFBP-7                       | Insulin-like growth factor-binding protein 7                                               | Q16270 | IGFBP7   | chr4:57110385   | Inverse variance weighted | 5  | -0.020 | 0.071 | 7.823E-01 | 0.996 | cis | Severe COVID-19 |
| 15394_79  | UNC5B                         | Netrin receptor UNC5B                                                                      | Q8B121 | UNC5B    | chr10:71212570  | Inverse variance weighted | 3  | 0.041  | 0.148 | 7.827E-01 | 0.996 | cis | Severe COVID-19 |
| 12812_25  | ACYP2                         | Acylphosphatase-2                                                                          | P14621 | ACYP2    | chr2:53970838   | Inverse variance weighted | 3  | 0.018  | 0.066 | 7.829E-01 | 0.996 | cis | Severe COVID-19 |
| 8398_277  | RAR-responsive protein TIG1   | Retinoic acid receptor responder protein 1                                                 | P49788 | RARRES1  | chr3:158732489  | Inverse variance weighted | 6  | -0.008 | 0.030 | 7.835E-01 | 0.996 | cis | Severe COVID-19 |
| 18330_7   | PGM2                          | Phosphoglucomutase-2                                                                       | Q96003 | PGM2     | chr4:37826660   | Inverse variance weighted | 3  | 0.022  | 0.081 | 7.841E-01 | 0.996 | cis | Severe COVID-19 |
| 5688_65   | CBLN4                         | Cerebellin-4                                                                               | Q9NTU7 | CBLN4    | chr20:56005519  | Inverse variance weighted | 5  | 0.023  | 0.086 | 7.848E-01 | 0.996 | cis | Severe COVID-19 |
| 4548_4    | Fucosyltransferase 3          | Galactoside 3(4)-L-fucosyltransferase                                                      | P21217 | FUT3     | chr19:5851471   | Inverse variance weighted | 9  | -0.015 | 0.056 | 7.852E-01 | 0.996 | cis | Severe COVID-19 |
| 13384_110 | FUMH                          | Fumarate hydratase, mitochondrial                                                          | P07954 | FUT3     | chr1:241519799  | Wald ratio                | 1  | 0.030  | 0.112 | 7.856E-01 | 0.996 | cis | Severe COVID-19 |
| 3583_54   | Arylsulfatase A               | Arylsulfatase A                                                                            | P15289 | ARSA     | chr22:50628173  | Wald ratio                | 1  | -0.050 | 0.183 | 7.856E-01 | 0.996 | cis | Severe COVID-19 |

|           |                                  |                                                                          |        |           |                 |                           |    |        |       |           |       |     |                 |
|-----------|----------------------------------|--------------------------------------------------------------------------|--------|-----------|-----------------|---------------------------|----|--------|-------|-----------|-------|-----|-----------------|
| 12450_42  | PMVK                             | Phosphomevalonate kinase                                                 | Q15126 | PMVK      | chr1:154936719  | Inverse variance weighted | 2  | 0.173  | 0.639 | 7.860E-01 | 0.996 | cis | Severe COVID-19 |
| 6081_52   | PCOC2                            | Procollagen C-endopeptidase enhancer 2                                   | Q9UKZ9 | PCOLCE2   | chr3:142889206  | Inverse variance weighted | 10 | -0.014 | 0.052 | 7.871E-01 | 0.996 | cis | Severe COVID-19 |
| 4232_19   | IGF-1 sR                         | Insulin-like growth factor 1 receptor                                    | P08069 | IGF1R     | chr15:98648539  | Inverse variance weighted | 2  | 0.092  | 0.344 | 7.883E-01 | 0.996 | cis | Severe COVID-19 |
| 18312_68  | NDRG3                            | Protein NDRG3                                                            | Q9UGV2 | NDRG3     | chr20:36746090  | Inverse variance weighted | 3  | -0.073 | 0.273 | 7.884E-01 | 0.996 | cis | Severe COVID-19 |
| 6433_57   | FA20A                            | Pseudokinase FAM20A                                                      | Q96MK3 | FAM20A    | chr17:68601367  | Inverse variance weighted | 3  | -0.029 | 0.108 | 7.885E-01 | 0.996 | cis | Severe COVID-19 |
| 18387_7   | suppression of tumorigenicity 13 | Hsc70-interacting protein                                                | P05052 | ST13      | chr22:40856639  | Wald ratio                | 1  | -0.075 | 0.280 | 7.891E-01 | 0.996 | cis | Severe COVID-19 |
| 5939_42   | TWEAK                            | Tumor necrosis factor ligand superfamily member 12                       | O43508 | TNFSF12   | chr17:7548508   | Inverse variance weighted | 3  | -0.062 | 0.233 | 7.896E-01 | 0.996 | cis | Severe COVID-19 |
| 5657_28   | SIAAA                            | CMP-N-acetylneuraminate-beta-galactosamide-alpha-2,3-sialyltransferase 1 | Q11201 | ST3GAL1   | chr8:133571940  | Inverse variance weighted | 2  | 0.040  | 0.150 | 7.900E-01 | 0.996 | cis | Severe COVID-19 |
| 17514_48  | RAB21                            | Ras-related protein Rab-21                                               | Q9UL25 | RAB21     | chr12:71754863  | Wald ratio                | 1  | -0.042 | 0.160 | 7.911E-01 | 0.996 | cis | Severe COVID-19 |
| 11214_40  | DNJB9                            | DnaI homolog subfamily B member 9                                        | Q9UB53 | DNAJB9    | chr7:108569867  | Wald ratio                | 1  | -0.077 | 0.290 | 7.916E-01 | 0.996 | cis | Severe COVID-19 |
| 5620_13   | AMD                              | Peptidyl-glycine alpha-amidating monooxygenase                           | P19021 | PAM       | chr5:102753981  | Inverse variance weighted | 10 | 0.008  | 0.029 | 7.921E-01 | 0.996 | cis | Severe COVID-19 |
| 4152_58   | Prekallikrein                    | Plasma kallikrein                                                        | P03952 | KLKB1     | chr4:186226438  | Inverse variance weighted | 4  | 0.022  | 0.083 | 7.922E-01 | 0.996 | cis | Severe COVID-19 |
| 16616_137 | ENOB                             | Beta-enolase                                                             | P13929 | ENO3      | chr17:4948092   | Inverse variance weighted | 2  | -0.013 | 0.049 | 7.932E-01 | 0.996 | cis | Severe COVID-19 |
| 13397_88  | HBD-2                            | Beta-defensin 4A                                                         | O15263 | DEFB4A    | chr8:7894677    | Inverse variance weighted | 3  | -0.036 | 0.139 | 7.934E-01 | 0.996 | cis | Severe COVID-19 |
| 15613_16  | LIPP                             | Pancreatic triacylglycerol lipase                                        | P16233 | PNLIP     | chr10:116545931 | Wald ratio                | 1  | -0.083 | 0.320 | 7.942E-01 | 0.996 | cis | Severe COVID-19 |
| 10558_26  | PCDH9                            | Protocadherin-9                                                          | Q9HC56 | PCDH9     | chr13:67230445  | Inverse variance weighted | 4  | 0.016  | 0.062 | 7.947E-01 | 0.996 | cis | Severe COVID-19 |
| 6451_64   | ASPIN                            | Asporin                                                                  | Q9BXN1 | ASPIN     | chr9:92482506   | Inverse variance weighted | 8  | -0.016 | 0.062 | 7.958E-01 | 0.996 | cis | Severe COVID-19 |
| 13088_397 | BTC                              | Betacellulin                                                             | P35070 | BTC       | chr4:74794523   | Inverse variance weighted | 2  | -0.023 | 0.089 | 7.966E-01 | 0.996 | cis | Severe COVID-19 |
| 9197_4    | LEG9                             | Galectin-9                                                               | O00182 | LGALS9    | chr17:27629798  | Wald ratio                | 1  | -0.035 | 0.136 | 7.970E-01 | 0.996 | cis | Severe COVID-19 |
| 2913_1    | MPIF-1                           | C-C motif chemokine 23                                                   | P55773 | CCL23     | chr17:36017972  | Inverse variance weighted | 2  | -0.047 | 0.182 | 7.971E-01 | 0.996 | cis | Severe COVID-19 |
| 9282_12   | CRIS2                            | Cysteine-rich secretory protein 2                                        | P16562 | CRISP2    | chr6:49713590   | Inverse variance weighted | 6  | 0.014  | 0.056 | 7.978E-01 | 0.996 | cis | Severe COVID-19 |
| 8428_102  | NTRI                             | Neurotrimin                                                              | Q9P121 | NTM       | chr11:131370478 | Inverse variance weighted | 4  | -0.032 | 0.126 | 7.982E-01 | 0.996 | cis | Severe COVID-19 |
| 17712_7   | ID1I                             | Isopentenyl-diphosphate Delta-isomerase 1                                | Q13907 | ID1I      | chr10:1049119   | Wald ratio                | 1  | 0.055  | 0.214 | 7.983E-01 | 0.996 | cis | Severe COVID-19 |
| 9369_174  | NGL1                             | Leucine-rich repeat-containing protein 4C                                | Q9HCJ2 | LRRCAC    | chr11:41459773  | Inverse variance weighted | 3  | 0.038  | 0.150 | 7.983E-01 | 0.996 | cis | Severe COVID-19 |
| 5346_24   | CPNE1: C2, 1 and 2               | Copine-1:Ca2+-dependent membrane-targeting module domains 1 and 2        | Q99829 | CPNE1     | chr20:35664956  | Inverse variance weighted | 9  | -0.008 | 0.031 | 7.998E-01 | 0.996 | cis | Severe COVID-19 |
| 5456_59   | CNDP1                            | Beta-Ala-His dipeptidase                                                 | Q96KN2 | CNDP1     | chr18:74534500  | Inverse variance weighted | 6  | -0.013 | 0.051 | 8.007E-01 | 0.996 | cis | Severe COVID-19 |
| 4467_49   | SPARCL1                          | SPARC-like protein 1                                                     | Q14515 | SPARCL1   | chr4:87531061   | Inverse variance weighted | 6  | 0.013  | 0.052 | 8.010E-01 | 0.996 | cis | Severe COVID-19 |
| 2780_35   | Lactoferrin                      | Lactotransferrin                                                         | P02788 | LTf       | chr3:46485234   | Inverse variance weighted | 3  | -0.030 | 0.119 | 8.013E-01 | 0.996 | cis | Severe COVID-19 |
| 13109_82  | NEGR1                            | Neuronal growth regulator 1                                              | Q7Z381 | NEGR1     | chr1:72282539   | Wald ratio                | 1  | -0.058 | 0.232 | 8.019E-01 | 0.996 | cis | Severe COVID-19 |
| 9360_33   | EDIL3                            | EGF-like repeat and discoidin I-like domain-containing protein 3         | O43854 | EDIL3     | chr5:84384880   | Inverse variance weighted | 2  | -0.050 | 0.199 | 8.024E-01 | 0.996 | cis | Severe COVID-19 |
| 5029_3    | SEPR                             | Prolyl endopeptidase FAP                                                 | Q12884 | FAP       | chr2:162245151  | Inverse variance weighted | 5  | 0.048  | 0.191 | 8.027E-01 | 0.996 | cis | Severe COVID-19 |
| 8007_19   | Cathepsin B                      | Cathepsin B                                                              | Q07858 | CTSB      | chr8:11869533   | Inverse variance weighted | 6  | 0.008  | 0.032 | 8.028E-01 | 0.996 | cis | Severe COVID-19 |
| 13720_95  | Proteinase-3                     | Myeloblastin                                                             | P24158 | PRTN3     | chr19:840999    | Inverse variance weighted | 6  | 0.010  | 0.040 | 8.028E-01 | 0.996 | cis | Severe COVID-19 |
| 9599_6    | PIANP                            | PILR alpha-associated neural protein                                     | Q8IYJ0 | PIANP     | chr12:6700815   | Wald ratio                | 1  | -0.082 | 0.328 | 8.031E-01 | 0.996 | cis | Severe COVID-19 |
| 5452_71   | ASGR1                            | Asialoglycoprotein receptor 1                                            | P07306 | ASGR1     | chr17:7179564   | Inverse variance weighted | 2  | 0.046  | 0.187 | 8.055E-01 | 0.996 | cis | Severe COVID-19 |
| 13116_25  | CD177                            | CD177 antigen                                                            | Q8N6Q3 | CD177     | chr19:43353686  | Inverse variance weighted | 7  | -0.008 | 0.032 | 8.076E-01 | 0.996 | cis | Severe COVID-19 |
| 3329_14   | PGRP-S                           | Peptidoglycan recognition protein 1                                      | O75594 | PGLYRP1   | chr19:46023053  | Inverse variance weighted | 4  | -0.018 | 0.076 | 8.079E-01 | 0.996 | cis | Severe COVID-19 |
| 13472_35  | HDHD2                            | Haloacid dehalogenase-like hydrolase domain-containing protein 2         | Q9HOR4 | HDHD2     | chr18:47150500  | Inverse variance weighted | 3  | 0.020  | 0.083 | 8.082E-01 | 0.996 | cis | Severe COVID-19 |
| 8099_42   | SPON2                            | Spondin-2                                                                | Q9BUD6 | SPON2     | chr4:1208962    | Inverse variance weighted | 6  | -0.020 | 0.085 | 8.095E-01 | 0.996 | cis | Severe COVID-19 |
| 9326_33   | ITI heavy chain H2               | Inter-alpha-trypsin inhibitor heavy chain H2                             | P19823 | ITI2H     | chr10:7703316   | Inverse variance weighted | 9  | 0.015  | 0.064 | 8.097E-01 | 0.996 | cis | Severe COVID-19 |
| 4996_66   | HRG                              | Histidine-rich glycoprotein                                              | P04196 | HRG       | chr3:186660216  | Inverse variance weighted | 4  | 0.014  | 0.058 | 8.103E-01 | 0.996 | cis | Severe COVID-19 |
| 12560_9   | NTSC                             | 5'(3')-deoxyribonucleotidase, cytosolic type                             | Q8TCD5 | NTSC      | chr17:75131757  | Inverse variance weighted | 5  | 0.009  | 0.037 | 8.105E-01 | 0.996 | cis | Severe COVID-19 |
| 9525_1    | PTK7                             | Inactive tyrosine-protein kinase 7                                       | Q13308 | PTK7      | chr6:43076307   | Inverse variance weighted | 2  | 0.063  | 0.263 | 8.105E-01 | 0.996 | cis | Severe COVID-19 |
| 4374_45   | MIC-1                            | Growth/differentiation factor 15                                         | Q99988 | GDF15     | chr19:18374731  | Inverse variance weighted | 7  | -0.013 | 0.055 | 8.114E-01 | 0.996 | cis | Severe COVID-19 |
| 8080_24   | PSMP                             | Prostate-associated microseminoprotein                                   | Q116U9 | MSMP      | chr9:35756613   | Wald ratio                | 1  | -0.054 | 0.226 | 8.114E-01 | 0.996 | cis | Severe COVID-19 |
| 6252_62   | Secretoglobin family 3A member 1 | Secretoglobin family 3A member 1                                         | Q96QR1 | SCGB3A1   | chr5:180591499  | Inverse variance weighted | 4  | 0.017  | 0.071 | 8.127E-01 | 0.996 | cis | Severe COVID-19 |
| 15384_15  | KLOTHO                           | Klotho                                                                   | Q9UEF7 | KL        | chr13:33016423  | Inverse variance weighted | 4  | 0.027  | 0.113 | 8.127E-01 | 0.996 | cis | Severe COVID-19 |
| 6444_15   | PSG3                             | Pregnancy-specific beta-1-glycoprotein 3                                 | Q16557 | PSG3      | chr19:42740481  | Inverse variance weighted | 6  | -0.016 | 0.069 | 8.130E-01 | 0.996 | cis | Severe COVID-19 |
| 2590_69   | ROR1                             | Inactive tyrosine-protein kinase transmembrane receptor ROR1             | Q01973 | ROR1      | chr1:63774017   | Inverse variance weighted | 3  | 0.015  | 0.065 | 8.131E-01 | 0.996 | cis | Severe COVID-19 |
| 13983_27  | QOR                              | Quinone oxidoreductase                                                   | Q08257 | CRYZ      | chr1:74733408   | Inverse variance weighted | 7  | 0.008  | 0.035 | 8.135E-01 | 0.996 | cis | Severe COVID-19 |
| 15387_44  | Neuropilin-2                     | Neuropilin-2                                                             | O60462 | NRP2      | chr2:205681990  | Inverse variance weighted | 4  | -0.019 | 0.082 | 8.136E-01 | 0.996 | cis | Severe COVID-19 |
| 14151_4   | UCRP                             | Ubiquitin-like protein ISG15                                             | P05161 | ISG15     | chr1:1001138    | Inverse variance weighted | 2  | 0.011  | 0.045 | 8.143E-01 | 0.996 | cis | Severe COVID-19 |
| 12657_2   | FCL                              | GDP-L-fucose synthase                                                    | Q13630 | GFUS      | chr8:143618048  | Wald ratio                | 1  | -0.083 | 0.353 | 8.147E-01 | 0.996 | cis | Severe COVID-19 |
| 11969_5   | S100A2                           | Protein S100-A2                                                          | P29034 | S100A2    | chr1:153567890  | Wald ratio                | 1  | -0.087 | 0.374 | 8.153E-01 | 0.996 | cis | Severe COVID-19 |
| 9201_13   | Transgelin-2                     | Transgelin-2                                                             | P37802 | TAGLN2    | chr1:159925507  | Wald ratio                | 1  | 0.077  | 0.330 | 8.154E-01 | 0.996 | cis | Severe COVID-19 |
| 8024_64   | TPST2                            | Protein-tyrosine sulfotransferase 2                                      | O60704 | TPST2     | chr22:26596717  | Inverse variance weighted | 2  | 0.030  | 0.129 | 8.159E-01 | 0.996 | cis | Severe COVID-19 |
| 2681_23   | HGF                              | Hepatocyte growth factor                                                 | P14210 | HGF       | chr7:81770438   | Wald ratio                | 1  | 0.047  | 0.202 | 8.166E-01 | 0.996 | cis | Severe COVID-19 |
| 3033_57   | Galectin-2                       | Galectin-2                                                               | P05162 | LGALS2    | chr22:37582616  | Inverse variance weighted | 2  | 0.025  | 0.108 | 8.174E-01 | 0.996 | cis | Severe COVID-19 |
| 18236_3   | LEGL                             | Galectin-related protein                                                 | Q3ZCW2 | LGALS1    | chr2:64453969   | Wald ratio                | 1  | 0.045  | 0.194 | 8.184E-01 | 0.996 | cis | Severe COVID-19 |
| 7050_5    | NEGR1                            | Neuronal growth regulator 1                                              | Q7Z381 | NEGR1     | chr1:72282539   | Wald ratio                | 1  | 0.078  | 0.341 | 8.188E-01 | 0.996 | cis | Severe COVID-19 |
| 9713_67   | PGFRL                            | Platelet-derived growth factor receptor-like protein                     | Q15198 | PDGFRL    | chr8:17576433   | Inverse variance weighted | 6  | -0.010 | 0.043 | 8.193E-01 | 0.996 | cis | Severe COVID-19 |
| 9470_15   | MET24                            | Methyltransferase-like protein 24                                        | Q5JXM2 | METT124   | chr6:110358349  | Inverse variance weighted | 4  | -0.027 | 0.120 | 8.209E-01 | 0.996 | cis | Severe COVID-19 |
| 3535_84   | DKK1                             | Dickkopf-related protein 1                                               | O94907 | DKK1      | chr10:52314281  | Inverse variance weighted | 5  | -0.019 | 0.083 | 8.222E-01 | 0.996 | cis | Severe COVID-19 |
| 17490_4   | SH3BGR13-like protein            | SH3 domain-binding glutamic acid-rich-like protein 3                     | Q9H299 | SH3BGR13  | chr1:26280086   | Inverse variance weighted | 3  | 0.013  | 0.057 | 8.223E-01 | 0.996 | cis | Severe COVID-19 |
| 15376_134 | CATE                             | Cathepsin E                                                              | P14091 | CTSE      | chr1:206023909  | Inverse variance weighted | 4  | -0.010 | 0.045 | 8.223E-01 | 0.996 | cis | Severe COVID-19 |
| 8039_41   | F177A                            | Protein FAM177A1                                                         | Q8N128 | FAM177A1  | chr14:35045117  | Inverse variance weighted | 6  | 0.010  | 0.043 | 8.234E-01 | 0.996 | cis | Severe COVID-19 |
| 7208_60   | MGTA4                            | Alpha-1,3-mannosyl-glycoprotein 4-beta-N-acetylglucosaminyltransferase C | Q9UBM8 | MGAT4C    | chr12:86838904  | Wald ratio                | 1  | 0.055  | 0.247 | 8.235E-01 | 0.996 | cis | Severe COVID-19 |
| 19338_3   | LZIC                             | Protein LZIC                                                             | Q8WZM0 | LZIC      | chr1:9943407    | Wald ratio                | 1  | -0.098 | 0.442 | 8.242E-01 | 0.996 | cis | Severe COVID-19 |
| 9839_148  | Tirap                            | Toll/interleukin-1 receptor domain-containing adapter protein            | P58753 | TIRAP     | chr11:126282497 | Inverse variance weighted | 3  | -0.020 | 0.089 | 8.249E-01 | 0.996 | cis | Severe COVID-19 |
| 15486_126 | ABP1                             | Amyloid-sensitive amine oxidase [copper-containing]                      | P19801 | AOC1      | chr7:150824627  | Inverse variance weighted | 10 | -0.006 | 0.026 | 8.253E-01 | 0.996 | cis | Severe COVID-19 |
| 19590_46  | SP-D                             | Pulmonary surfactant-associated protein D                                | P35247 | SFTPD     | chr10:79982614  | Inverse variance weighted | 6  | -0.011 | 0.049 | 8.254E-01 | 0.996 | cis | Severe COVID-19 |
| 15521_4   | Alcadein alpha-1                 | Calsyntenin-1                                                            | O94985 | CLSTN1    | chr1:9823984    | Inverse variance weighted | 6  | -0.005 | 0.022 | 8.257E-01 | 0.996 | cis | Severe COVID-19 |
| 12381_26  | CBR1                             | Carbonyl reductase [NADPH] 1                                             | P16152 | CBR1      | chr21:36069941  | Inverse variance weighted | 5  | -0.016 | 0.075 | 8.259E-01 | 0.996 | cis | Severe COVID-19 |
| 4886_3    | MCP-3                            | C-C motif chemokine 7                                                    | P80098 | CCL7      | chr17:34270221  | Inverse variance weighted | 4  | -0.014 | 0.062 | 8.268E-01 | 0.997 | cis | Severe COVID-19 |
| 19124_9   | UBCP1                            | Ubiquitin-like domain-containing CTD phosphatase 1                       | Q8WVY7 | UBCLP1    | chr5:159263290  | Inverse variance weighted | 2  | -0.027 | 0.123 | 8.286E-01 | 0.998 | cis | Severe COVID-19 |
| 4471_50   | TGM3                             | Protein-glutamine gamma-glutamyltransferase E                            | Q08188 | TGM3      | chr20:2296001   | Inverse variance weighted | 4  | -0.009 | 0.040 | 8.300E-01 | 0.998 | cis | Severe COVID-19 |
| 15453_3   | a1-Microglobulin                 | Alpha-1-microglobulin                                                    | P02760 | AMBIP     | chr9:114078328  | Inverse variance weighted | 2  | -0.034 | 0.159 | 8.311E-01 | 0.998 | cis | Severe COVID-19 |
| 8304_50   | OPG                              | Tumor necrosis factor receptor superfamily member 11B                    | O00300 | TNFRSF11B | chr8:118951885  | Inverse variance weighted | 4  | 0.017  | 0.080 | 8.343E-01 | 0.998 | cis | Severe COVID-19 |

|           |                                            |                                                                                                      |        |          |                 |                           |    |        |       |           |       |     |                 |
|-----------|--------------------------------------------|------------------------------------------------------------------------------------------------------|--------|----------|-----------------|---------------------------|----|--------|-------|-----------|-------|-----|-----------------|
| 3894_15   | NAGK                                       | N-acetyl-D-glucosamine kinase                                                                        | Q9UJ70 | NAGK     | chr2:71064344   | Inverse variance weighted | 3  | 0.017  | 0.080 | 8.347E-01 | 0.998 | cis | Severe COVID-19 |
| 19236_24  | TCP4                                       | Activated RNA polymerase II transcriptional coactivator p15                                          | P53999 | SUB1     | chr5:32531633   | Wald ratio                | 1  | 0.067  | 0.321 | 8.349E-01 | 0.998 | cis | Severe COVID-19 |
| 10521_10  | MXRA8:ECD                                  | Matrix-remodeling-associated protein 8:Extracellular domain                                          | Q9BRK3 | MXRA8    | chr1:1361777    | Wald ratio                | 1  | 0.033  | 0.159 | 8.353E-01 | 0.998 | cis | Severe COVID-19 |
| 13621_31  | AP2A2                                      | AP-2 complex subunit alpha-2                                                                         | Q94973 | AP2A2    | chr11:924881    | Wald ratio                | 1  | -0.050 | 0.241 | 8.355E-01 | 0.998 | cis | Severe COVID-19 |
| 10075_75  | ACB06                                      | Acyl-CoA-binding domain-containing protein 6                                                         | Q9BR61 | ACB06    | chr1:180502954  | Wald ratio                | 1  | 0.073  | 0.349 | 8.357E-01 | 0.998 | cis | Severe COVID-19 |
| 3488_64   | Catalase                                   | Catalase                                                                                             | P04040 | CAT      | chr11:34438934  | Inverse variance weighted | 3  | 0.035  | 0.170 | 8.357E-01 | 0.998 | cis | Severe COVID-19 |
| 7059_14   | LIRA6                                      | Leukocyte immunoglobulin-like receptor subfamily A member 6                                          | Q6P173 | LIRA6    | chr19:54242791  | Inverse variance weighted | 7  | 0.018  | 0.089 | 8.367E-01 | 0.998 | cis | Severe COVID-19 |
| 9018_38   | PCD10:ECD                                  | Protocadherin-10:Extracellular domain                                                                | Q9P2E7 | PCDH10   | chr4:133149294  | Inverse variance weighted | 2  | 0.023  | 0.113 | 8.370E-01 | 0.998 | cis | Severe COVID-19 |
| 8957_72   | XTP3B                                      | Endoplasmic reticulum lectin 1                                                                       | Q96021 | ERLEC1   | chr2:53787009   | Wald ratio                | 1  | 0.045  | 0.221 | 8.372E-01 | 0.998 | cis | Severe COVID-19 |
| 5727_35   | B3GLT                                      | Beta-1,3-glucosyltransferase                                                                         | Q6Y288 | B3GLCT   | chr13:31199975  | Inverse variance weighted | 2  | -0.018 | 0.089 | 8.386E-01 | 0.998 | cis | Severe COVID-19 |
| 5604_30   | HPSE                                       | Heparanase                                                                                           | Q9Y251 | HPSE     | chr4:83335153   | Inverse variance weighted | 2  | -0.030 | 0.149 | 8.387E-01 | 0.998 | cis | Severe COVID-19 |
| 14079_14  | IL-18 Ra                                   | Interleukin-18 receptor 1                                                                            | Q13478 | IL18R1   | chr2:102311529  | Inverse variance weighted | 5  | -0.010 | 0.052 | 8.399E-01 | 0.998 | cis | Severe COVID-19 |
| 8397_147  | QSOX2                                      | Sulfhydryl oxidase 2                                                                                 | Q6ZRP7 | QSOX2    | chr9:136245812  | Inverse variance weighted | 7  | 0.007  | 0.036 | 8.400E-01 | 0.998 | cis | Severe COVID-19 |
| 6425_87   | MMP19                                      | Matrix metalloproteinase-19                                                                          | Q99542 | MMP19    | chr12:55842966  | Inverse variance weighted | 3  | 0.023  | 0.114 | 8.418E-01 | 0.998 | cis | Severe COVID-19 |
| 6496_60   | DLK1:ECD                                   | Protein delta homolog 1:Extracellular domain                                                         | R80370 | DLK1     | chr14:100725705 | Inverse variance weighted | 2  | 0.104  | 0.521 | 8.420E-01 | 0.998 | cis | Severe COVID-19 |
| 15633_6   | RBP                                        | Retinol-binding protein 4                                                                            | P02753 | RBP4     | chr10:93601744  | Wald ratio                | 1  | 0.053  | 0.272 | 8.445E-01 | 0.998 | cis | Severe COVID-19 |
| 7266_4    | SPA9                                       | Serpin A9                                                                                            | Q86WD7 | SERPINA9 | chr14:94479689  | Inverse variance weighted | 2  | 0.032  | 0.164 | 8.469E-01 | 0.998 | cis | Severe COVID-19 |
| 3419_49   | CAMK2D                                     | Calcium/calmodulin-dependent protein kinase type II subunit delta                                    | Q13557 | CAMK2D   | chr4:113761927  | Wald ratio                | 1  | 0.064  | 0.334 | 8.484E-01 | 0.998 | cis | Severe COVID-19 |
| 12714_38  | AP1G2                                      | AP-1 complex subunit gamma-like 2                                                                    | Q75843 | AP1G2    | chr14:23568070  | Inverse variance weighted | 3  | 0.016  | 0.085 | 8.486E-01 | 0.998 | cis | Severe COVID-19 |
| 6617_12   | FCRL6                                      | Fc receptor-like protein 6                                                                           | Q6DN72 | FCRL6    | chr1:159800511  | Wald ratio                | 1  | 0.030  | 0.156 | 8.486E-01 | 0.998 | cis | Severe COVID-19 |
| 19135_5   | Cytosolic 5'-nucleotidase III-like protein | 7-methylguanosine phosphate-specific 5'-nucleotidase                                                 | Q96977 | NT5C3B   | chr17:41836260  | Inverse variance weighted | 9  | -0.010 | 0.053 | 8.486E-01 | 0.998 | cis | Severe COVID-19 |
| 17453_34  | Ceruloplasmin                              | Ceruloplasmin                                                                                        | P00450 | CP       | chr3:149221829  | Inverse variance weighted | 3  | 0.020  | 0.107 | 8.487E-01 | 0.998 | cis | Severe COVID-19 |
| 3773_15   | sTie-2                                     | Angiopoietin-1 receptor, soluble                                                                     | Q02763 | TEK      | chr9:27109141   | Inverse variance weighted | 4  | -0.019 | 0.098 | 8.490E-01 | 0.998 | cis | Severe COVID-19 |
| 5462_62   | Ficolin-3                                  | Ficolin-3                                                                                            | Q75636 | FCN3     | chr1:27374824   | Inverse variance weighted | 7  | -0.005 | 0.026 | 8.498E-01 | 0.998 | cis | Severe COVID-19 |
| 9578_263  | MANS4                                      | MANSC domain-containing protein 4                                                                    | AGNH57 | MANS4    | chr12:27780236  | Inverse variance weighted | 7  | 0.007  | 0.035 | 8.505E-01 | 0.998 | cis | Severe COVID-19 |
| 19161_1   | UBP15                                      | Ubiquitin carboxyl-terminal hydrolase 15                                                             | Q9YA48 | USP15    | chr12:62260338  | Inverse variance weighted | 2  | -0.019 | 0.099 | 8.507E-01 | 0.998 | cis | Severe COVID-19 |
| 4971_1    | CATZ                                       | Cathepsin Z                                                                                          | Q9UBR2 | CTSZ     | chr20:59008238  | Inverse variance weighted | 5  | -0.009 | 0.048 | 8.511E-01 | 0.998 | cis | Severe COVID-19 |
| 12831_21  | TESC                                       | Calcineurin B homologous protein 3                                                                   | Q96852 | TESC     | chr12:117099479 | Inverse variance weighted | 5  | 0.011  | 0.058 | 8.530E-01 | 0.998 | cis | Severe COVID-19 |
| 3181_50   | Cathepsin S                                | Cathepsin S                                                                                          | P25774 | CTSS     | chr1:150765957  | Inverse variance weighted | 4  | -0.009 | 0.048 | 8.542E-01 | 0.998 | cis | Severe COVID-19 |
| 18930_28  | SLIT2                                      | Slit homolog 2 protein                                                                               | Q94813 | SLIT2    | chr4:20251905   | Inverse variance weighted | 2  | -0.024 | 0.129 | 8.552E-01 | 0.998 | cis | Severe COVID-19 |
| 10832_24  | B4GT6                                      | Beta-1,4-galactosyltransferase 6                                                                     | Q9UBX8 | B4GALT6  | chr18:31685836  | Inverse variance weighted | 4  | -0.006 | 0.034 | 8.573E-01 | 0.998 | cis | Severe COVID-19 |
| 17843_30  | PPCS                                       | Phosphopantothenate--cysteine ligase                                                                 | Q9HA88 | PPCS     | chr1:42456117   | Inverse variance weighted | 2  | 0.027  | 0.152 | 8.573E-01 | 0.998 | cis | Severe COVID-19 |
| 8274_64   | Syntaxin-7                                 | Syntaxin-7                                                                                           | O15400 | STX7     | chr6:132513198  | Wald ratio                | 1  | -0.022 | 0.126 | 8.591E-01 | 0.998 | cis | Severe COVID-19 |
| 4930_21   | Stanniocalcin-1                            | Stanniocalcin-1                                                                                      | P52823 | STC1     | chr8:23854806   | Wald ratio                | 1  | -0.031 | 0.176 | 8.592E-01 | 0.998 | cis | Severe COVID-19 |
| 15514_26  | Pseudocholinesterase                       | Cholinesterase                                                                                       | P06276 | BCHC     | chr3:165837462  | Inverse variance weighted | 6  | 0.007  | 0.037 | 8.594E-01 | 0.998 | cis | Severe COVID-19 |
| 5129_12   | SREC-1                                     | Scavenger receptor class F member 1                                                                  | Q14162 | SCARF1   | chr17:1645744   | Inverse variance weighted | 5  | 0.010  | 0.058 | 8.602E-01 | 0.998 | cis | Severe COVID-19 |
| 19437_61  | L-VEGF165                                  | Isoform L-VEGF165                                                                                    | P15692 | VEGFA    | chr6:43770184   | Inverse variance weighted | 7  | 0.019  | 0.109 | 8.603E-01 | 0.998 | cis | Severe COVID-19 |
| 19206_20  | 8ODP                                       | 7,8-dihydro-8-oxoguanine triphosphatase                                                              | P36639 | NUDT1    | chr7:2242226    | Wald ratio                | 1  | 0.025  | 0.143 | 8.613E-01 | 0.998 | cis | Severe COVID-19 |
| 11192_168 | TINAL                                      | Tubulointerstitial nephritis antigen-like                                                            | Q9GZM7 | TINAGL1  | chr1:31576485   | Wald ratio                | 1  | 0.026  | 0.151 | 8.614E-01 | 0.998 | cis | Severe COVID-19 |
| 17332_3   | ARHL2                                      | Poly(ADP-ribose) glycohydrolase ARH3                                                                 | Q9NX46 | ADPRS    | chr1:36088892   | Inverse variance weighted | 3  | -0.016 | 0.093 | 8.635E-01 | 0.998 | cis | Severe COVID-19 |
| 7968_15   | CRTAM                                      | Cytotoxic and regulatory T-cell molecule                                                             | Q95727 | CRTAM    | chr11:122838500 | Inverse variance weighted | 6  | -0.009 | 0.055 | 8.636E-01 | 0.998 | cis | Severe COVID-19 |
| 15471_29  | UPR2                                       | Pancreatic lipase-related protein 2                                                                  | P54317 | PNLIPRP2 | chr10:116620953 | Inverse variance weighted | 11 | -0.004 | 0.024 | 8.646E-01 | 0.998 | cis | Severe COVID-19 |
| 18422_41  | ERG19                                      | Diphosphomevalonate decarboxylase                                                                    | P53602 | MVD      | chr16:88663161  | Inverse variance weighted | 2  | -0.039 | 0.230 | 8.658E-01 | 0.998 | cis | Severe COVID-19 |
| 13622_16  | 2A5A                                       | Serine/threonine-protein phosphatase 2A 56 kDa regulatory subunit alpha isoform                      | Q15172 | PPP2R5A  | chr1:212285410  | Wald ratio                | 1  | -0.061 | 0.359 | 8.659E-01 | 0.998 | cis | Severe COVID-19 |
| 11516_7   | FABPL                                      | Fatty acid-binding protein, liver                                                                    | P07148 | FABP1    | chr2:88128062   | Wald ratio                | 1  | -0.023 | 0.135 | 8.669E-01 | 0.998 | cis | Severe COVID-19 |
| 5060_62   | B7-H1                                      | Programmed cell death 1 ligand 1                                                                     | Q9NZQ7 | CD274    | chr9:5450503    | Inverse variance weighted | 2  | 0.011  | 0.065 | 8.674E-01 | 0.998 | cis | Severe COVID-19 |
| 8842_16   | GRM1C                                      | GRAM domain-containing protein 1C                                                                    | Q8IY50 | GRAMD1C  | chr3:13828182   | Inverse variance weighted | 5  | 0.017  | 0.100 | 8.677E-01 | 0.998 | cis | Severe COVID-19 |
| 18289_16  | MIP-5                                      | C-C motif chemokine 15                                                                               | Q16663 | CCL15    | chr17:36001553  | Inverse variance weighted | 5  | 0.011  | 0.068 | 8.680E-01 | 0.998 | cis | Severe COVID-19 |
| 4337_49   | CRP                                        | C-reactive protein                                                                                   | P02741 | CRP      | chr1:159714589  | Inverse variance weighted | 2  | -0.014 | 0.085 | 8.686E-01 | 0.998 | cis | Severe COVID-19 |
| 4979_34   | DERM                                       | Dermatopontin                                                                                        | Q07507 | DPT      | chr1:168729206  | Inverse variance weighted | 6  | -0.008 | 0.051 | 8.691E-01 | 0.998 | cis | Severe COVID-19 |
| 18882_7   | CSTN2                                      | Calsyntenin-2                                                                                        | Q9HA00 | CLSTN2   | chr3:139935185  | Inverse variance weighted | 7  | 0.010  | 0.062 | 8.697E-01 | 0.998 | cis | Severe COVID-19 |
| 17748_21  | QORX                                       | Quinone oxidoreductase PIG3                                                                          | Q53FA7 | TP53I3   | chr2:24085861   | Inverse variance weighted | 5  | 0.010  | 0.062 | 8.707E-01 | 0.998 | cis | Severe COVID-19 |
| 12411_60  | MAX                                        | Protein max                                                                                          | P61244 | MAX      | chr14:65102695  | Wald ratio                | 1  | -0.014 | 0.085 | 8.707E-01 | 0.998 | cis | Severe COVID-19 |
| 2705_5    | TECK                                       | C-C motif chemokine 25                                                                               | O15444 | CCL25    | chr19:8052318   | Inverse variance weighted | 11 | 0.008  | 0.050 | 8.712E-01 | 0.998 | cis | Severe COVID-19 |
| 5630_48   | CM35H                                      | CMRF35-like molecule 8                                                                               | Q9UGN4 | CD300A   | chr17:74466399  | Inverse variance weighted | 8  | -0.005 | 0.030 | 8.713E-01 | 0.998 | cis | Severe COVID-19 |
| 8309_12   | HYAL1                                      | Hyaluronidase-1                                                                                      | Q12794 | HYAL1    | chr3:50312381   | Inverse variance weighted | 2  | -0.047 | 0.290 | 8.718E-01 | 0.998 | cis | Severe COVID-19 |
| 7980_72   | B3GN2                                      | N-acetyllactosaminide beta-1,3-N-acetylglucosaminyltransferase 2                                     | Q9NY97 | B3GN2    | chr2:62196115   | Inverse variance weighted | 3  | 0.015  | 0.091 | 8.725E-01 | 0.998 | cis | Severe COVID-19 |
| 8894_80   | hnRNP A/B                                  | Heterogeneous nuclear ribonucleoprotein A/B                                                          | Q99729 | HNRNPAB  | chr5:178204533  | Wald ratio                | 1  | -0.034 | 0.214 | 8.739E-01 | 0.998 | cis | Severe COVID-19 |
| 5660_51   | SOD3                                       | Extracellular superoxide dismutase [Cu-Zn]                                                           | P08294 | SOD3     | chr4:24789912   | Inverse variance weighted | 10 | 0.006  | 0.036 | 8.742E-01 | 0.998 | cis | Severe COVID-19 |
| 5728_60   | FCRL1                                      | Fc receptor-like protein 1                                                                           | Q9LJA6 | FCRL1    | chr1:157820120  | Inverse variance weighted | 4  | -0.018 | 0.115 | 8.752E-01 | 0.998 | cis | Severe COVID-19 |
| 11696_7   | RABP2                                      | Cellular retinoic acid-binding protein 2                                                             | P29373 | CRABP2   | chr1:156705816  | Inverse variance weighted | 3  | -0.013 | 0.083 | 8.756E-01 | 0.998 | cis | Severe COVID-19 |
| 12855_16  | CTO32                                      | Cas scaffolding protein family member 4                                                              | Q9NQ75 | CASSA    | chr20:56412112  | Wald ratio                | 1  | 0.045  | 0.285 | 8.757E-01 | 0.998 | cis | Severe COVID-19 |
| 18313_4   | Asparaginase-like protein 1                | Isospartyl peptidase/L-asparaginase                                                                  | Q7L266 | ASRG1L   | chr11:62337448  | Inverse variance weighted | 2  | -0.013 | 0.086 | 8.761E-01 | 0.998 | cis | Severe COVID-19 |
| 4332_6    | CLC1B                                      | C-type lectin domain family 1 member B                                                               | Q9P126 | CLEC1B   | chr12:10013424  | Wald ratio                | 1  | -0.033 | 0.211 | 8.763E-01 | 0.998 | cis | Severe COVID-19 |
| 13534_20  | MYOM2                                      | Myomesin-2                                                                                           | P54296 | MYOM2    | chr8:2045046    | Inverse variance weighted | 3  | 0.033  | 0.212 | 8.774E-01 | 0.998 | cis | Severe COVID-19 |
| 6520_87   | MGP                                        | Matrix Gla protein                                                                                   | P08493 | MGP      | chr12:14885857  | Wald ratio                | 1  | -0.037 | 0.245 | 8.799E-01 | 0.998 | cis | Severe COVID-19 |
| 12703_6   | NEK7                                       | Serine/threonine-protein kinase Nek7                                                                 | Q8TDX7 | NEK7     | chr1:198156994  | Wald ratio                | 1  | -0.038 | 0.253 | 8.801E-01 | 0.998 | cis | Severe COVID-19 |
| 17161_1   | OST48                                      | Dolichyl-diphosphooligosaccharide--protein glycosyltransferase 48 kDa subunit                        | P39656 | DDOST    | chr1:20661544   | Wald ratio                | 1  | -0.046 | 0.307 | 8.806E-01 | 0.998 | cis | Severe COVID-19 |
| 3195_50   | Granulysin                                 | Granulysin                                                                                           | P22749 | GNLY     | chr2:85685175   | Inverse variance weighted | 7  | -0.007 | 0.044 | 8.813E-01 | 0.998 | cis | Severe COVID-19 |
| 9244_27   | PPT1                                       | Palmitoyl-protein thioesterase 1                                                                     | P50897 | PPT1     | chr1:40097260   | Inverse variance weighted | 2  | -0.011 | 0.073 | 8.818E-01 | 0.998 | cis | Severe COVID-19 |
| 18225_13  | HEBP1                                      | Heme-binding protein 1                                                                               | Q9NRV9 | HEBP1    | chr12:13000265  | Inverse variance weighted | 6  | -0.004 | 0.025 | 8.825E-01 | 0.998 | cis | Severe COVID-19 |
| 5593_11   | PDIA5                                      | Protein disulfide-isomerase A5                                                                       | Q14554 | PDIA5    | chr3:123067025  | Inverse variance weighted | 8  | 0.004  | 0.024 | 8.830E-01 | 0.998 | cis | Severe COVID-19 |
| 2879_9    | a1-Antichymotrypsin                        | Alpha-1-antichymotrypsin                                                                             | P01011 | SERPINA3 | chr14:94612384  | Wald ratio                | 1  | 0.049  | 0.333 | 8.841E-01 | 0.998 | cis | Severe COVID-19 |
| 8469_41   | IGFBP-2                                    | Insulin-like growth factor-binding protein 2                                                         | P18065 | IGFBP2   | chr2:216632828  | Wald ratio                | 1  | -0.043 | 0.296 | 8.855E-01 | 0.998 | cis | Severe COVID-19 |
| 16561_9   | Alpha-1B-glycoprotein                      | Alpha-1B-glycoprotein                                                                                | P04217 | A1B8     | chr19:58353492  | Inverse variance weighted | 4  | 0.006  | 0.039 | 8.866E-01 | 0.998 | cis | Severe COVID-19 |
| 18881_7   | CD97                                       | CD97 antigen                                                                                         | P48960 | ADGRE5   | chr19:14380501  | Inverse variance weighted | 4  | -0.026 | 0.189 | 8.884E-01 | 0.998 | cis | Severe COVID-19 |
| 4297_62   | Spondin-1                                  | Spondin-1                                                                                            | Q9HC86 | SPON1    | chr11:13962723  | Inverse variance weighted | 4  | -0.007 | 0.053 | 8.888E-01 | 0.998 | cis | Severe COVID-19 |
| 3831_21   | pTEN                                       | Phosphatidylinositol 3,4,5-trisphosphate 3-phosphatase and dual-specificity protein phosphatase PTEN | P60484 | PTEN     | chr10:87862563  | Wald ratio                | 1  | -0.051 | 0.367 | 8.889E-01 | 0.998 | cis | Severe COVID-19 |

|           |                                            |                                                                                                   |        |          |                 |                           |    |        |       |           |       |     |                 |
|-----------|--------------------------------------------|---------------------------------------------------------------------------------------------------|--------|----------|-----------------|---------------------------|----|--------|-------|-----------|-------|-----|-----------------|
| 7849_3    | Glutaminyl cyclase                         | Glutaminyl-peptide cyclotransferase                                                               | Q16769 | QPCT     | chr2:37342827   | Inverse variance weighted | 4  | -0.014 | 0.098 | 8.899E-01 | 0.998 | cis | Severe COVID-19 |
| 6627_25   | UIPR1                                      | Inactive pancreatic lipase-related protein 1                                                      | P54315 | PNUIPRP1 | chr10:116590385 | Inverse variance weighted | 2  | 0.015  | 0.108 | 8.906E-01 | 0.998 | cis | Severe COVID-19 |
| 13095_51  | PSP                                        | Lithostathine-1-alpha                                                                             | P05451 | REG1A    | chr2:79120362   | Inverse variance weighted | 4  | 0.021  | 0.154 | 8.911E-01 | 0.998 | cis | Severe COVID-19 |
| 9383_24   | CH3L2                                      | Chitinase-3-like protein 2                                                                        | Q15782 | CH3L2    | chr1:111200771  | Wald ratio                | 1  | 0.034  | 0.254 | 8.924E-01 | 0.998 | cis | Severe COVID-19 |
| 11140_56  | CO1A1:C-term propeptide                    | Collagen alpha-1(I) chain:C-term propeptide                                                       | P02452 | COL1A1   | chr17:50201632  | Inverse variance weighted | 3  | -0.012 | 0.091 | 8.926E-01 | 0.998 | cis | Severe COVID-19 |
| 4133_54   | Granzyme B                                 | Granzyme B                                                                                        | P10144 | GZMB     | chr14:24634267  | Wald ratio                | 1  | -0.022 | 0.162 | 8.931E-01 | 0.998 | cis | Severe COVID-19 |
| 16614_27  | RSP01                                      | R-spondin-1                                                                                       | Q2MKA7 | RSP01    | chr1:37634892   | Inverse variance weighted | 2  | -0.009 | 0.068 | 8.932E-01 | 0.998 | cis | Severe COVID-19 |
| 2644_11   | PKC-A                                      | Protein kinase C alpha type                                                                       | P17252 | PRKCA    | chr17:66302613  | Wald ratio                | 1  | -0.045 | 0.334 | 8.938E-01 | 0.998 | cis | Severe COVID-19 |
| 12378_71  | TPSN                                       | Tapasin                                                                                           | O15533 | TAPBP    | chr6:33314284   | Inverse variance weighted | 4  | -0.003 | 0.025 | 8.940E-01 | 0.998 | cis | Severe COVID-19 |
| 17764_108 | RHOC                                       | Rho-related GTP-binding protein RhoC                                                              | P08134 | RHOC     | chr1:112707434  | Wald ratio                | 1  | -0.018 | 0.138 | 8.943E-01 | 0.998 | cis | Severe COVID-19 |
| 4129_72   | Factor B                                   | Complement factor B                                                                               | P00751 | CFB      | chr6:31945650   | Inverse variance weighted | 2  | -0.016 | 0.120 | 8.954E-01 | 0.998 | cis | Severe COVID-19 |
| 8969_49   | CD14                                       | Monocyte differentiation antigen CD14                                                             | P08571 | CD14     | chr5:140633700  | Wald ratio                | 1  | 0.062  | 0.469 | 8.954E-01 | 0.998 | cis | Severe COVID-19 |
| 6364_7    | TPSNR                                      | Tapasin-related protein                                                                           | Q9BX59 | TAPBPL   | chr12:6451690   | Inverse variance weighted | 7  | -0.006 | 0.043 | 8.957E-01 | 0.998 | cis | Severe COVID-19 |
| 11266_8   | SELPL:ECD                                  | P-selectin glycoprotein ligand 1:Extracellular domain                                             | Q14242 | SELPLG   | chr12:108633894 | Inverse variance weighted | 2  | 0.015  | 0.116 | 8.964E-01 | 0.998 | cis | Severe COVID-19 |
| 10462_14  | INSL5                                      | Insulin-like peptide INSL5                                                                        | Q9Y5Q6 | INSL5    | chr1:66801276   | Wald ratio                | 1  | -0.034 | 0.263 | 8.969E-01 | 0.998 | cis | Severe COVID-19 |
| 5131_15   | TAJ                                        | Tumor necrosis factor receptor superfamily member 19                                              | Q9NS68 | TNFRSF19 | chr13:23570370  | Wald ratio                | 1  | -0.020 | 0.155 | 8.972E-01 | 0.998 | cis | Severe COVID-19 |
| 4962_52   | ARMEL                                      | Cerebral dopamine neurotrophic factor                                                             | Q49AHO | CDNF     | chr10:14838575  | Inverse variance weighted | 6  | -0.009 | 0.069 | 8.972E-01 | 0.998 | cis | Severe COVID-19 |
| 9076_25   | PENK                                       | Proenkephalin-A                                                                                   | P01210 | PENK     | chr8:56446671   | Inverse variance weighted | 5  | -0.005 | 0.036 | 8.975E-01 | 0.998 | cis | Severe COVID-19 |
| 15535_3   | Marapsin                                   | Serine protease 27                                                                                | Q9BQR3 | PRSS27   | chr16:2720551   | Wald ratio                | 1  | 0.020  | 0.155 | 8.978E-01 | 0.998 | cis | Severe COVID-19 |
| 6247_9    | SIRB1                                      | Signal-regulatory protein beta-1                                                                  | O00241 | SIRPB1   | chr20:1620061   | Inverse variance weighted | 9  | -0.003 | 0.020 | 8.982E-01 | 0.998 | cis | Severe COVID-19 |
| 8840_61   | C1s                                        | Complement C1s subcomponent                                                                       | P09871 | C1S      | chr12:6988259   | Inverse variance weighted | 4  | 0.016  | 0.126 | 8.982E-01 | 0.998 | cis | Severe COVID-19 |
| 7096_30   | RMD1                                       | Regulator of microtubule dynamics protein 1                                                       | Q96DB5 | RMDN1    | chr8:86514357   | Inverse variance weighted | 4  | 0.009  | 0.070 | 8.990E-01 | 0.998 | cis | Severe COVID-19 |
| 15487_164 | carboxylesterase, liver                    | Liver carboxylesterase 1                                                                          | P23141 | CES1     | chr16:55833337  | Wald ratio                | 1  | 0.039  | 0.311 | 8.999E-01 | 0.998 | cis | Severe COVID-19 |
| 15587_20  | FOLR2                                      | Folate receptor beta                                                                              | P14207 | FOLR2    | chr11:72216601  | Wald ratio                | 1  | -0.015 | 0.117 | 9.004E-01 | 0.998 | cis | Severe COVID-19 |
| 11196_31  | Collagen alpha-3(VI):BPTI/Kunitz inhibitor | Collagen alpha-3(VI) chain:Bovine pancreatic trypsin inhibitor/Kunitz inhibitor domain, isoform 1 | P12111 | COL6A3   | chr2:237414328  | Wald ratio                | 1  | -0.029 | 0.234 | 9.009E-01 | 0.998 | cis | Severe COVID-19 |
| 15539_15  | SUK1                                       | SLIT and NTRK-like protein 1                                                                      | Q96PX8 | SLITRK1  | chr13:83882474  | Wald ratio                | 1  | -0.028 | 0.225 | 9.018E-01 | 0.998 | cis | Severe COVID-19 |
| 13717_15  | FCN2                                       | Ficolin-2                                                                                         | Q15485 | FCN2     | chr9:134880810  | Inverse variance weighted | 8  | -0.007 | 0.055 | 9.019E-01 | 0.998 | cis | Severe COVID-19 |
| 7970_315  | NAR3                                       | Ecto-ADP-ribosyltransferase 3                                                                     | Q13508 | ART3     | chr4:76011184   | Inverse variance weighted | 4  | 0.009  | 0.071 | 9.021E-01 | 0.998 | cis | Severe COVID-19 |
| 4811_33   | ITI heavy chain H4                         | Inter-alpha-trypsin inhibitor heavy chain H4                                                      | Q14624 | ITH4     | chr3:52830688   | Inverse variance weighted | 2  | -0.056 | 0.457 | 9.031E-01 | 0.998 | cis | Severe COVID-19 |
| 17765_3   | SPN1                                       | Snurportin-1                                                                                      | O95149 | SNUPN    | chr15:75626469  | Wald ratio                | 1  | 0.014  | 0.113 | 9.031E-01 | 0.998 | cis | Severe COVID-19 |
| 9251_28   | MA2B2                                      | Epididymis-specific alpha-mannosidase                                                             | Q9Y2E5 | MAN2B2   | chr4:6575189    | Inverse variance weighted | 9  | -0.004 | 0.033 | 9.057E-01 | 0.998 | cis | Severe COVID-19 |
| 5980_55   | BOLA3                                      | BolA-like protein 3                                                                               | O53533 | BOLA3    | chr2:74147912   | Wald ratio                | 1  | 0.015  | 0.126 | 9.058E-01 | 0.998 | cis | Severe COVID-19 |
| 7955_195  | ITI heavy chain H1                         | Inter-alpha-trypsin inhibitor heavy chain H1                                                      | P19827 | ITH1     | chr3:52777595   | Inverse variance weighted | 7  | 0.011  | 0.090 | 9.064E-01 | 0.998 | cis | Severe COVID-19 |
| 7628_40   | CREL1                                      | Cysteine-rich with EGF-like domain protein 1                                                      | Q96HD1 | CRELD1   | chr3:9933793    | Inverse variance weighted | 12 | -0.004 | 0.033 | 9.067E-01 | 0.998 | cis | Severe COVID-19 |
| 5066_134  | CLM6                                       | CMRF35-like molecule 6                                                                            | Q08708 | CD300C   | chr17:74546115  | Inverse variance weighted | 4  | 0.020  | 0.171 | 9.073E-01 | 0.998 | cis | Severe COVID-19 |
| 9256_78   | NPTX1                                      | Neuronal pentraxin-1                                                                              | P15818 | NPTX1    | chr17:80477843  | Inverse variance weighted | 6  | -0.006 | 0.054 | 9.079E-01 | 0.998 | cis | Severe COVID-19 |
| 16307_22  | UNC5H4                                     | Netrin receptor UNC5D                                                                             | Q6UXZ4 | UNC5D    | chr8:35235475   | Inverse variance weighted | 3  | -0.013 | 0.115 | 9.088E-01 | 0.998 | cis | Severe COVID-19 |
| 4535_50   | BST1                                       | ADP-ribosyl cyclase/cyclic ADP-ribose hydrolase 2                                                 | Q10588 | BST1     | chr4:15703065   | Inverse variance weighted | 11 | 0.002  | 0.020 | 9.089E-01 | 0.998 | cis | Severe COVID-19 |
| 3364_76   | Cathepsin V                                | Cathepsin L2                                                                                      | O60911 | CTSV     | chr9:97156556   | Inverse variance weighted | 4  | 0.009  | 0.083 | 9.092E-01 | 0.998 | cis | Severe COVID-19 |
| 8043_153  | COMP                                       | Cartilage oligomeric matrix protein                                                               | P49747 | COMP     | chr19:18791305  | Inverse variance weighted | 4  | -0.009 | 0.080 | 9.092E-01 | 0.998 | cis | Severe COVID-19 |
| 16785_45  | HD-5                                       | Defensin-5                                                                                        | Q01523 | DEFAS-5  | chr8:7056739    | Wald ratio                | 1  | 0.026  | 0.227 | 9.102E-01 | 0.998 | cis | Severe COVID-19 |
| 5634_39   | OFUT1                                      | GDP-fucose protein O-fucosyltransferase 1                                                         | Q9H488 | POFUT1   | chr20:32207855  | Inverse variance weighted | 3  | 0.010  | 0.091 | 9.104E-01 | 0.998 | cis | Severe COVID-19 |
| 11208_15  | NAGPA                                      | N-acetylglucosamine-1-phosphodiester alpha-N-acetylglucosaminidase                                | Q9UK23 | NAGPA    | chr16:5034141   | Inverse variance weighted | 7  | -0.007 | 0.059 | 9.105E-01 | 0.998 | cis | Severe COVID-19 |
| 19262_219 | ACADOV                                     | Very long-chain specific acyl-CoA dehydrogenase, mitochondrial                                    | P49748 | ACADVL   | chr17:7217125   | Wald ratio                | 1  | -0.034 | 0.299 | 9.107E-01 | 0.998 | cis | Severe COVID-19 |
| 5532_53   | bFGF-R                                     | Fibroblast growth factor receptor 1                                                               | P11362 | FGFR1    | chr8:38468834   | Inverse variance weighted | 2  | -0.017 | 0.152 | 9.111E-01 | 0.998 | cis | Severe COVID-19 |
| 18197_97  | KCRS                                       | Creatine kinase S-type, mitochondrial                                                             | P17540 | CKMT2    | chr5:81233320   | Wald ratio                | 1  | 0.036  | 0.327 | 9.122E-01 | 0.998 | cis | Severe COVID-19 |
| 9267_2    | CBPA4                                      | Carboxypeptidase A4                                                                               | Q9UI42 | CPA4     | chr7:130293134  | Inverse variance weighted | 11 | -0.002 | 0.018 | 9.135E-01 | 0.998 | cis | Severe COVID-19 |
| 15322_35  | CRADD                                      | Death domain-containing protein CRADD                                                             | P78560 | CRADD    | chr12:93677375  | Inverse variance weighted | 2  | -0.079 | 0.725 | 9.136E-01 | 0.998 | cis | Severe COVID-19 |
| 18222_34  | SHLB2                                      | Endophilin-B2                                                                                     | Q9NR46 | SH3GLB2  | chr9:129028331  | Inverse variance weighted | 3  | -0.006 | 0.054 | 9.146E-01 | 0.998 | cis | Severe COVID-19 |
| 7218_87   | AT1B2                                      | Sodium/potassium-transporting ATPase subunit beta-2                                               | P14415 | ATP1B2   | chr17:7646627   | Inverse variance weighted | 3  | -0.011 | 0.100 | 9.146E-01 | 0.998 | cis | Severe COVID-19 |
| 3173_49   | ASAH1                                      | N-acyl ethanolamine-hydrolyzing acid amidase                                                      | Q02083 | NAAA     | chr4:75941013   | Inverse variance weighted | 10 | -0.005 | 0.042 | 9.146E-01 | 0.998 | cis | Severe COVID-19 |
| 13536_56  | POLI                                       | DNA polymerase iota                                                                               | Q9UNA4 | POLI     | chr18:54269517  | Wald ratio                | 1  | 0.021  | 0.198 | 9.152E-01 | 0.998 | cis | Severe COVID-19 |
| 18918_86  | PDE4A                                      | cAMP-specific 3',5'-cyclic phosphodiesterase 4A                                                   | P27815 | PDE4A    | chr19:10416773  | Inverse variance weighted | 4  | -0.016 | 0.153 | 9.154E-01 | 0.998 | cis | Severe COVID-19 |
| 5698_60   | Tenascin-X                                 | Tenascin-X                                                                                        | P22105 | TNXB     | chr6:32115334   | Inverse variance weighted | 5  | 0.005  | 0.050 | 9.156E-01 | 0.998 | cis | Severe COVID-19 |
| 14107_1   | MTMFS                                      | 5-formyltetrahydrofolate cyclo-ligase                                                             | P49914 | MTMFS    | chr15:79897379  | Inverse variance weighted | 6  | -0.005 | 0.043 | 9.166E-01 | 0.998 | cis | Severe COVID-19 |
| 2571_12   | IGFBP-3                                    | Insulin-like growth factor-binding protein 3                                                      | P17936 | IGFBP3   | chr7:45921874   | Inverse variance weighted | 4  | -0.006 | 0.054 | 9.168E-01 | 0.998 | cis | Severe COVID-19 |
| 8974_172  | COFA1                                      | Collagen alpha-1(XV) chain                                                                        | P39059 | COL15A1  | chr9:98943179   | Inverse variance weighted | 4  | -0.007 | 0.071 | 9.176E-01 | 0.998 | cis | Severe COVID-19 |
| 3050_7    | vWF                                        | von Willebrand factor                                                                             | P04275 | VWF      | chr12:6124770   | Inverse variance weighted | 4  | 0.026  | 0.252 | 9.188E-01 | 0.998 | cis | Severe COVID-19 |
| 2991_9    | IL-1SRI                                    | Interleukin-1 receptor type 1                                                                     | P14778 | IL1R1    | chr12:102064544 | Inverse variance weighted | 2  | 0.025  | 0.247 | 9.195E-01 | 0.998 | cis | Severe COVID-19 |
| 13118_5   | SMOC1                                      | SPARC-related modular calcium-binding protein 1                                                   | Q9H4F8 | SMOC1    | chr14:69854131  | Inverse variance weighted | 3  | -0.007 | 0.072 | 9.220E-01 | 0.998 | cis | Severe COVID-19 |
| 4834_61   | Epithelial cell kinase                     | Ephrin type-A receptor 2                                                                          | P29317 | EPHA2    | chr1:16156069   | Inverse variance weighted | 3  | 0.009  | 0.094 | 9.222E-01 | 0.998 | cis | Severe COVID-19 |
| 8252_2    | NOTUM                                      | Palmitoleoyl-protein carboxylesterase NOTUM                                                       | Q6P988 | NOTUM    | chr17:81961840  | Inverse variance weighted | 3  | -0.014 | 0.147 | 9.225E-01 | 0.998 | cis | Severe COVID-19 |
| 5076_53   | EPHAA                                      | Ephrin type-A receptor 10                                                                         | Q5J2Y3 | EPHA10   | chr1:37765133   | Wald ratio                | 1  | 0.020  | 0.209 | 9.226E-01 | 0.998 | cis | Severe COVID-19 |
| 9478_69   | KPRA                                       | Phosphoribosyl pyrophosphate synthase-associated protein 1                                        | Q14558 | PRPSA1   | chr17:76384521  | Wald ratio                | 1  | -0.027 | 0.278 | 9.234E-01 | 0.998 | cis | Severe COVID-19 |
| 15391_114 | GAS-6                                      | Growth arrest-specific protein 6                                                                  | Q14393 | GAS6     | chr13:113864076 | Inverse variance weighted | 4  | 0.005  | 0.058 | 9.246E-01 | 0.998 | cis | Severe COVID-19 |
| 18162_167 | IRAK4                                      | Interleukin-1 receptor-associated kinase 4                                                        | Q9NW23 | IRAK4    | chr12:43758944  | Wald ratio                | 1  | -0.018 | 0.190 | 9.249E-01 | 0.998 | cis | Severe COVID-19 |
| 15511_37  | NPTXR                                      | Neuronal pentraxin receptor                                                                       | O95502 | NPTXR    | chr22:38844028  | Inverse variance weighted | 7  | -0.004 | 0.041 | 9.253E-01 | 0.998 | cis | Severe COVID-19 |
| 14012_12  | LGP2                                       | Probable ATP-dependent RNA helicase DHX58                                                         | Q96C10 | DHX58    | chr17:42112714  | Inverse variance weighted | 2  | 0.013  | 0.136 | 9.255E-01 | 0.998 | cis | Severe COVID-19 |
| 7251_64   | CIQT3                                      | Complement C1q tumor necrosis factor-related protein 3                                            | Q9BXU4 | CIQTNF3  | chr5:34043213   | Inverse variance weighted | 2  | 0.010  | 0.109 | 9.262E-01 | 0.998 | cis | Severe COVID-19 |
| 15447_45  | Sorbitol dehydrogenase                     | Sorbitol dehydrogenase                                                                            | Q00796 | SORD     | chr15:45023147  | Inverse variance weighted | 4  | 0.006  | 0.066 | 9.263E-01 | 0.998 | cis | Severe COVID-19 |
| 6385_63   | VWA1                                       | von Willebrand factor A domain-containing protein 1                                               | Q6PC80 | VWA1     | chr1:1434861    | Inverse variance weighted | 5  | 0.005  | 0.056 | 9.281E-01 | 0.998 | cis | Severe COVID-19 |
| 9264_11   | CATO                                       | Cathepsin O                                                                                       | P43234 | CTSO     | chr4:155953912  | Inverse variance weighted | 2  | -0.009 | 0.099 | 9.287E-01 | 0.998 | cis | Severe COVID-19 |
| 4154_57   | P-Selectin                                 | P-selectin                                                                                        | P16109 | SELP     | chr1:169630193  | Inverse variance weighted | 3  | 0.011  | 0.126 | 9.295E-01 | 0.998 | cis | Severe COVID-19 |
| 12646_2   | RPE                                        | Ribulose-phosphate 3-epimerase                                                                    | Q96A79 | RPE      | chr2:210002565  | Wald ratio                | 1  | -0.016 | 0.185 | 9.301E-01 | 0.998 | cis | Severe COVID-19 |
| 6455_52   | HPLN4                                      | Hyaluronan and proteoglycan link protein 4                                                        | Q86UW8 | HAPLN4   | chr19:19262804  | Wald ratio                | 1  | 0.019  | 0.212 | 9.302E-01 | 0.998 | cis | Severe COVID-19 |
| 9241_40   | SIRPG                                      | Signal-regulatory protein gamma                                                                   | Q9P1W8 | SIRPG    | chr20:1657779   | Wald ratio                | 1  | -0.021 | 0.241 | 9.305E-01 | 0.998 | cis | Severe COVID-19 |
| 8250_2    | PTPRJ                                      | Receptor-type tyrosine-protein phosphatase eta                                                    | Q12913 | PTPRJ    | chr11:47980425  | Inverse variance weighted | 3  | -0.016 | 0.179 | 9.305E-01 | 0.998 | cis | Severe COVID-19 |
| 2278_61   | TIMP-2                                     | Metalloproteinase inhibitor 2                                                                     | P16035 | TIMP2    | chr17:78925387  | Wald ratio                | 1  | 0.019  | 0.214 | 9.311E-01 | 0.998 | cis | Severe COVID-19 |

|           |                                   |                                                                      |        |          |                 |                           |    |        |       |           |       |     |                 |
|-----------|-----------------------------------|----------------------------------------------------------------------|--------|----------|-----------------|---------------------------|----|--------|-------|-----------|-------|-----|-----------------|
| 12357_41  | SNP29                             | Synaptosomal-associated protein 29                                   | O95721 | SNAP29   | chr22:20859007  | Wald ratio                | 1  | 0.028  | 0.322 | 9.314E-01 | 0.998 | cis | Severe COVID-19 |
| 3326_58   | Nectin-like protein 2             | Cell adhesion molecule 1                                             | Q9BY67 | CADM1    | chr11:115504957 | Wald ratio                | 1  | -0.009 | 0.110 | 9.320E-01 | 0.998 | cis | Severe COVID-19 |
| 8013_9    | LMA2L                             | VIP36-like protein                                                   | Q9H0V9 | LMAN2L   | chr2:96740064   | Inverse variance weighted | 2  | 0.011  | 0.128 | 9.321E-01 | 0.998 | cis | Severe COVID-19 |
| 8364_74   | UST                               | Uronyl 2-sulfotransferase                                            | Q9Y2C2 | UST      | chr6:148747030  | Inverse variance weighted | 3  | 0.009  | 0.109 | 9.322E-01 | 0.998 | cis | Severe COVID-19 |
| 8660_5    | OLFL3                             | Olfactomedin-like protein 3                                          | Q9NRN5 | OLFM3    | chr1:113979391  | Inverse variance weighted | 2  | -0.012 | 0.144 | 9.324E-01 | 0.998 | cis | Severe COVID-19 |
| 9394_19   | Aminopeptidase                    | Carboxypeptidase Q                                                   | Q9Y646 | CPQ      | chr8:96645242   | Inverse variance weighted | 8  | 0.004  | 0.050 | 9.334E-01 | 0.998 | cis | Severe COVID-19 |
| 17726_3   | SAR1A                             | GTP-binding protein SAR1a                                            | Q9NR31 | SAR1A    | chr10:70170523  | Inverse variance weighted | 2  | -0.011 | 0.133 | 9.336E-01 | 0.998 | cis | Severe COVID-19 |
| 5740_17   | ROBO1                             | Roundabout homolog 1                                                 | Q9Y6N7 | ROBO1    | chr3:79767998   | Inverse variance weighted | 3  | 0.011  | 0.127 | 9.339E-01 | 0.998 | cis | Severe COVID-19 |
| 17672_184 | Gastric intrinsic factor          | Gastric intrinsic factor                                             | P27352 | CBUF     | chr11:59845499  | Inverse variance weighted | 2  | -0.014 | 0.167 | 9.340E-01 | 0.998 | cis | Severe COVID-19 |
| 18396_10  | AES                               | Amino-terminal enhancer of split                                     | Q08117 | TLE5     | chr19:3063107   | Wald ratio                | 1  | 0.025  | 0.302 | 9.342E-01 | 0.998 | cis | Severe COVID-19 |
| 2811_27   | Angiopoietin-1                    | Angiopoietin-1                                                       | Q15389 | ANGPT1   | chr8:107498055  | Wald ratio                | 1  | 0.018  | 0.224 | 9.345E-01 | 0.998 | cis | Severe COVID-19 |
| 10800_15  | Collagen-binding protein          | Serpin H1                                                            | P50454 | SERPINH1 | chr11:75562056  | Inverse variance weighted | 2  | 0.014  | 0.171 | 9.351E-01 | 0.998 | cis | Severe COVID-19 |
| 5404_53   | DR6                               | Tumor necrosis factor receptor superfamily member 21                 | Q75509 | TNFRSF21 | chr6:47309905   | Inverse variance weighted | 2  | -0.014 | 0.176 | 9.351E-01 | 0.998 | cis | Severe COVID-19 |
| 19197_95  | TH1L                              | Acetyl-CoA acetyltransferase, mitochondrial                          | P24752 | ACAT1    | chr11:108116695 | Inverse variance weighted | 2  | 0.017  | 0.208 | 9.355E-01 | 0.998 | cis | Severe COVID-19 |
| 17210_2   | TCL1A                             | T-cell leukemia/lymphoma protein 1A                                  | P56279 | TCL1A    | chr14:95714196  | Inverse variance weighted | 3  | -0.011 | 0.133 | 9.356E-01 | 0.998 | cis | Severe COVID-19 |
| 17327_3   | CNPY3                             | Protein canopy homolog 3                                             | Q9BT09 | CNPY3    | chr6:42929480   | Wald ratio                | 1  | -0.021 | 0.268 | 9.362E-01 | 0.998 | cis | Severe COVID-19 |
| 5231_79   | PCSK9                             | Proprotein convertase subtilisin/kexin type 9                        | Q8NBP7 | PCSK9    | chr1:55039447   | Inverse variance weighted | 6  | 0.004  | 0.054 | 9.366E-01 | 0.998 | cis | Severe COVID-19 |
| 3440_7    | granzyme A                        | Granzyme A                                                           | P12544 | GZMA     | chr5:55102646   | Inverse variance weighted | 4  | -0.004 | 0.056 | 9.377E-01 | 0.998 | cis | Severe COVID-19 |
| 4160_49   | MMP-2                             | 72 kDa type IV collagenase                                           | P08253 | MMP2     | chr16:55389700  | Inverse variance weighted | 2  | 0.013  | 0.168 | 9.380E-01 | 0.998 | cis | Severe COVID-19 |
| 15579_26  | ENPP6                             | Ectonucleotide pyrophosphatase/phosphodiesterase family member 6     | Q6UWV7 | ENPP6    | chr4:184221230  | Wald ratio                | 1  | -0.021 | 0.279 | 9.398E-01 | 0.998 | cis | Severe COVID-19 |
| 17706_4   | PPR1A                             | Protein phosphatase 1 regulatory subunit 1A                          | Q13522 | PPP1R1A  | chr12:54588659  | Wald ratio                | 1  | -0.022 | 0.287 | 9.400E-01 | 0.998 | cis | Severe COVID-19 |
| 15533_97  | Macrophage scavenger receptor:ECD | Macrophage scavenger receptor types I and II:Extracellular domain    | P21757 | MSR1     | chr8:16567490   | Inverse variance weighted | 5  | 0.003  | 0.040 | 9.417E-01 | 0.998 | cis | Severe COVID-19 |
| 5139_32   | UNC5H3                            | Netrin receptor UNC5C                                                | Q95185 | UNC5C    | chr4:95549206   | Inverse variance weighted | 3  | 0.006  | 0.083 | 9.420E-01 | 0.998 | cis | Severe COVID-19 |
| 13544_9   | HMH41                             | Rho GTPase-activating protein 45                                     | Q92619 | ARHGAP45 | chr19:1065923   | Wald ratio                | 1  | 0.008  | 0.116 | 9.427E-01 | 0.998 | cis | Severe COVID-19 |
| 9759_13   | INDO                              | Indoleamine 2,3-dioxygenase 1                                        | P14902 | IDO1     | chr8:39902275   | Wald ratio                | 1  | 0.018  | 0.254 | 9.433E-01 | 0.998 | cis | Severe COVID-19 |
| 15523_9   | HEM2                              | Delta-aminolevulinic acid dehydratase                                | P13716 | ALAD     | chr9:113401290  | Inverse variance weighted | 7  | -0.004 | 0.055 | 9.443E-01 | 0.998 | cis | Severe COVID-19 |
| 4413_3    | SLPI                              | Antileukoproteinase                                                  | P03973 | SLPI     | chr20:45254564  | Wald ratio                | 1  | -0.022 | 0.319 | 9.459E-01 | 0.998 | cis | Severe COVID-19 |
| 19556_12  | Complement receptor type 1        | Complement receptor type 1                                           | P17927 | CR1      | chr1:207496147  | Inverse variance weighted | 10 | 0.005  | 0.079 | 9.466E-01 | 0.998 | cis | Severe COVID-19 |
| 5605_77   | MFNG                              | Beta-1,3-N-acetylglucosaminyltransferase manic fringe                | Q00587 | MFNG     | chr22:37486393  | Wald ratio                | 1  | -0.014 | 0.212 | 9.466E-01 | 0.998 | cis | Severe COVID-19 |
| 11377_19  | ADH7                              | Alcohol dehydrogenase class 4 mu/sigma chain                         | P40394 | ADH7     | chr4:99435510   | Inverse variance weighted | 3  | -0.004 | 0.052 | 9.468E-01 | 0.998 | cis | Severe COVID-19 |
| 6077_63   | CECR1                             | Adenosine deaminase CECR1                                            | Q9N2K5 | ADA2     | chr22:17258235  | Inverse variance weighted | 5  | 0.003  | 0.040 | 9.480E-01 | 0.998 | cis | Severe COVID-19 |
| 12620_3   | Septin-11                         | Septin-11                                                            | Q9NV42 | SEPTIN11 | chr4:76949751   | Wald ratio                | 1  | -0.016 | 0.250 | 9.484E-01 | 0.998 | cis | Severe COVID-19 |
| 10603_1   | HIS3                              | Histatin-3                                                           | P15516 | HTN3     | chr4:70028455   | Inverse variance weighted | 3  | 0.007  | 0.115 | 9.487E-01 | 0.998 | cis | Severe COVID-19 |
| 2730_58   | MICA                              | MHC class I polypeptide-related sequence A                           | Q29983 | MICA     | chr6:31399784   | Inverse variance weighted | 12 | -0.003 | 0.047 | 9.492E-01 | 0.998 | cis | Severe COVID-19 |
| 18213_30  | UBE2F                             | NEED8-conjugating enzyme UBE2F                                       | Q969M7 | UBE2F    | chr2:237966827  | Wald ratio                | 1  | 0.019  | 0.300 | 9.494E-01 | 0.998 | cis | Severe COVID-19 |
| 7757_5    | DQA2                              | HLA class II histocompatibility antigen, DQ alpha 2 chain            | P01906 | HLA-DQA2 | chr6:32741391   | Inverse variance weighted | 3  | -0.007 | 0.108 | 9.494E-01 | 0.998 | cis | Severe COVID-19 |
| 19237_17  | D-dopachrome decarboxylase        | D-dopachrome decarboxylase                                           | P30046 | DDT      | chr22:23980525  | Inverse variance weighted | 2  | 0.009  | 0.139 | 9.501E-01 | 0.998 | cis | Severe COVID-19 |
| 3046_31   | resistin                          | Resistin                                                             | Q9HD89 | RETN     | chr19:7669049   | Inverse variance weighted | 6  | 0.004  | 0.070 | 9.505E-01 | 0.998 | cis | Severe COVID-19 |
| 3799_11   | Carbonic anhydrase III            | Carbonic anhydrase 3                                                 | P07451 | CA3      | chr8:85373436   | Inverse variance weighted | 4  | 0.006  | 0.090 | 9.508E-01 | 0.998 | cis | Severe COVID-19 |
| 12689_56  | ARCLB                             | Actin-related protein 2/3 complex subunit 1B                         | Q15143 | ARPC1B   | chr7:99374249   | Wald ratio                | 1  | 0.011  | 0.177 | 9.511E-01 | 0.998 | cis | Severe COVID-19 |
| 16324_38  | TLR1:ECD                          | Toll-like receptor 1:Extracellular domain                            | Q15399 | TLR1     | chr4:38856817   | Wald ratio                | 1  | -0.008 | 0.125 | 9.516E-01 | 0.998 | cis | Severe COVID-19 |
| 5021_13   | Ppase                             | Inorganic pyrophosphatase                                            | Q15181 | PPA1     | chr10:70233911  | Inverse variance weighted | 4  | -0.006 | 0.106 | 9.523E-01 | 0.998 | cis | Severe COVID-19 |
| 9995_6    | DUT                               | Deoxyuridine 5'-triphosphate nucleotidohydrolase, mitochondrial      | P33316 | DUT      | chr15:48331011  | Wald ratio                | 1  | 0.014  | 0.239 | 9.527E-01 | 0.998 | cis | Severe COVID-19 |
| 8890_9    | T132B                             | Transmembrane protein 132B                                           | Q140G7 | TMEM132B | chr12:125186386 | Inverse variance weighted | 2  | 0.012  | 0.196 | 9.530E-01 | 0.998 | cis | Severe COVID-19 |
| 16288_17  | EPHA4                             | Ephrin type-A receptor 4                                             | P54764 | EPHA4    | chr2:221574202  | Inverse variance weighted | 3  | -0.005 | 0.087 | 9.553E-01 | 0.998 | cis | Severe COVID-19 |
| 5663_18   | PF4V                              | Platelet factor 4 variant                                            | P10720 | PF4V1    | chr4:73853296   | Inverse variance weighted | 2  | -0.009 | 0.169 | 9.572E-01 | 0.998 | cis | Severe COVID-19 |
| 5085_18   | IL-20 Ra                          | Interleukin-20 receptor subunit alpha                                | Q9UHF4 | IL20RA   | chr6:137045180  | Wald ratio                | 1  | -0.020 | 0.379 | 9.579E-01 | 0.998 | cis | Severe COVID-19 |
| 3298_52   | Contactin-4                       | Contactin-4                                                          | Q8IUV2 | CNTN4    | chr3:2098813    | Inverse variance weighted | 8  | 0.002  | 0.046 | 9.581E-01 | 0.998 | cis | Severe COVID-19 |
| 12436_84  | GST omega-1                       | Glutathione S-transferase omega-1                                    | P78417 | GSTO1    | chr10:104235356 | Inverse variance weighted | 9  | -0.002 | 0.032 | 9.587E-01 | 0.998 | cis | Severe COVID-19 |
| 7999_23   | CD39                              | Ectonucleoside triphosphate diphosphohydrolase 1                     | P49961 | ENTPD1   | chr10:95711779  | Inverse variance weighted | 3  | -0.008 | 0.159 | 9.592E-01 | 0.998 | cis | Severe COVID-19 |
| 6649_51   | NET1                              | Netrin-1                                                             | Q95631 | NTN1     | chr17:9021510   | Inverse variance weighted | 6  | 0.003  | 0.068 | 9.595E-01 | 0.998 | cis | Severe COVID-19 |
| 19251_56  | Platelet proteoglycan             | Seryglycin                                                           | P10124 | SRGN     | chr10:69088103  | Inverse variance weighted | 5  | -0.003 | 0.061 | 9.599E-01 | 0.998 | cis | Severe COVID-19 |
| 10940_25  | SRCA                              | Sarcalumenin                                                         | Q86TD4 | SRL      | chr16:4242080   | Wald ratio                | 1  | -0.014 | 0.277 | 9.601E-01 | 0.998 | cis | Severe COVID-19 |
| 7761_125  | CHKB                              | Choline/ethanolamine kinase                                          | Q9Y259 | CHKB     | chr22:50601455  | Inverse variance weighted | 3  | -0.007 | 0.143 | 9.609E-01 | 0.998 | cis | Severe COVID-19 |
| 5609_92   | F19A5                             | Protein FAM19A5                                                      | Q725A7 | TAF45    | chr22:48489553  | Wald ratio                | 1  | -0.015 | 0.326 | 9.631E-01 | 0.998 | cis | Severe COVID-19 |
| 3484_60   | Angiotensinogen                   | Angiotensinogen                                                      | P01019 | AGT      | chr1:230745576  | Inverse variance weighted | 2  | 0.004  | 0.088 | 9.642E-01 | 0.998 | cis | Severe COVID-19 |
| 15559_5   | ANTR2                             | Anthrax toxin receptor 2                                             | P58335 | ANTXR2   | chr4:80125454   | Inverse variance weighted | 4  | -0.006 | 0.132 | 9.646E-01 | 0.998 | cis | Severe COVID-19 |
| 5353_89   | IL-1Ra                            | Interleukin-1 receptor antagonist protein                            | P18510 | IL1RN    | chr2:113099315  | Inverse variance weighted | 3  | 0.005  | 0.121 | 9.656E-01 | 0.998 | cis | Severe COVID-19 |
| 15516_12  | SAA-4                             | Serum amyloid A-4 protein                                            | P35542 | SAA4     | chr11:18236802  | Inverse variance weighted | 7  | 0.001  | 0.024 | 9.667E-01 | 0.998 | cis | Severe COVID-19 |
| 17722_5   | FKBP52 protein                    | Peptidyl-prolyl cis-trans isomerase FKBP4                            | Q02790 | FKBP4    | chr12:2794970   | Inverse variance weighted | 2  | 0.010  | 0.237 | 9.673E-01 | 0.998 | cis | Severe COVID-19 |
| 19136_22  | MMSA                              | Methylmalonate-semialdehyde dehydrogenase [acylating], mitochondrial | Q02252 | ALDH6A1  | chr14:74084492  | Inverse variance weighted | 2  | -0.011 | 0.265 | 9.675E-01 | 0.998 | cis | Severe COVID-19 |
| 3302_58   | CYTF                              | Cystatin-F                                                           | Q76096 | CS7      | chr20:24949269  | Inverse variance weighted | 7  | 0.001  | 0.033 | 9.677E-01 | 0.998 | cis | Severe COVID-19 |
| 9906_21   | TICN3                             | Testician-3                                                          | Q9BQ16 | SPOCK3   | chr4:167234796  | Inverse variance weighted | 11 | 0.001  | 0.037 | 9.681E-01 | 0.998 | cis | Severe COVID-19 |
| 2961_1    | Protein C                         | Vitamin K-dependent protein C                                        | P04070 | PROC     | chr2:127418427  | Inverse variance weighted | 3  | -0.005 | 0.123 | 9.698E-01 | 0.998 | cis | Severe COVID-19 |
| 2632_5    | IL-12 Rb1                         | Interleukin-12 receptor subunit beta-1                               | P42701 | IL12RB1  | chr19:18098944  | Wald ratio                | 1  | 0.007  | 0.193 | 9.698E-01 | 0.998 | cis | Severe COVID-19 |
| 7009_8    | CD72                              | B-cell differentiation antigen CD72                                  | P21854 | CD72     | chr9:35646810   | Inverse variance weighted | 2  | -0.005 | 0.134 | 9.701E-01 | 0.998 | cis | Severe COVID-19 |
| 3291_30   | CD23                              | Low affinity immunoglobulin epsilon Fc receptor                      | P06734 | FCER2    | chr19:7702146   | Inverse variance weighted | 6  | -0.002 | 0.049 | 9.718E-01 | 0.998 | cis | Severe COVID-19 |
| 19213_1   | ISK4                              | Serine protease inhibitor Kazal-type 4                               | O60575 | SPINK4   | chr9:33218365   | Wald ratio                | 1  | 0.002  | 0.073 | 9.727E-01 | 0.998 | cis | Severe COVID-19 |
| 5363_51   | Semaphorin 3E                     | Semaphorin-3E                                                        | Q15041 | SEMA3E   | chr7:83649139   | Inverse variance weighted | 10 | -0.001 | 0.028 | 9.744E-01 | 0.998 | cis | Severe COVID-19 |
| 13642_90  | CIG49                             | Interferon-induced protein with tetratricopeptide repeats 3          | O14879 | IFIT3    | chr10:89327307  | Wald ratio                | 1  | -0.006 | 0.180 | 9.746E-01 | 0.998 | cis | Severe COVID-19 |
| 3172_28   | ARSB                              | Arylsulfatase B                                                      | P15848 | ARSB     | chr5:78986087   | Inverse variance weighted | 2  | 0.003  | 0.104 | 9.750E-01 | 0.998 | cis | Severe COVID-19 |
| 5087_5    | IL-22BP                           | Interleukin-22 receptor subunit alpha-2                              | Q969J5 | IL22RA2  | chr6:137173648  | Inverse variance weighted | 5  | -0.004 | 0.115 | 9.757E-01 | 0.998 | cis | Severe COVID-19 |
| 10627_87  | APLP2                             | Amyloid-like protein 2                                               | Q06481 | APLP2    | chr11:130068147 | Inverse variance weighted | 2  | -0.005 | 0.167 | 9.760E-01 | 0.998 | cis | Severe COVID-19 |
| 9191_8    | Trefoil factor 2                  | Trefoil factor 2                                                     | Q03403 | TF2F     | chr21:42350997  | Inverse variance weighted | 2  | 0.006  | 0.200 | 9.770E-01 | 0.998 | cis | Severe COVID-19 |
| 12338_27  | EGFLA                             | Pikachurin                                                           | Q63HQ2 | EGFLAM   | chr5:38258409   | Inverse variance weighted | 3  | 0.002  | 0.064 | 9.779E-01 | 0.998 | cis | Severe COVID-19 |
| 15304_1   | PAP1                              | Regenerating islet-derived protein 3-alpha                           | Q06141 | REG3A    | chr2:79159753   | Inverse variance weighted | 3  | 0.003  | 0.130 | 9.792E-01 | 0.998 | cis | Severe COVID-19 |
| 7769_29   | 3BP2                              | SH3 domain-binding protein 2                                         | P78314 | SH3BP2   | chr4:2793071    | Inverse variance weighted | 3  | 0.004  | 0.152 | 9.802E-01 | 0.998 | cis | Severe COVID-19 |
| 2994_71   | IL-1Rrp2                          | Interleukin-1 receptor-like 2                                        | Q9HB29 | IL1RL2   | chr2:102187006  | Wald ratio                | 1  | -0.003 | 0.106 | 9.810E-01 | 0.998 | cis | Severe COVID-19 |

|           |                                  |                                                                  |        |          |                 |                           |    |        |       |           |       |     |                       |
|-----------|----------------------------------|------------------------------------------------------------------|--------|----------|-----------------|---------------------------|----|--------|-------|-----------|-------|-----|-----------------------|
| 15686_49  | INHBC                            | Inhibin beta C chain                                             | P55103 | INHBC    | chr12:57434784  | Inverse variance weighted | 14 | 0.001  | 0.028 | 9.810E-01 | 0.998 | cis | Severe COVID-19       |
| 8243_55   | TATI                             | Serine protease inhibitor Kazal-type 1                           | P00895 | SPINK1   | chr5:147831671  | Inverse variance weighted | 2  | -0.004 | 0.162 | 9.818E-01 | 0.998 | cis | Severe COVID-19       |
| 8664_36   | PKDCC                            | Extracellular tyrosine-protein kinase PKDCC                      | Q504Y2 | PKDCC    | chr2:42048021   | Inverse variance weighted | 2  | 0.012  | 0.558 | 9.825E-01 | 0.998 | cis | Severe COVID-19       |
| 11431_235 | RECOQ1                           | ATP-dependent DNA helicase Q1                                    | P46063 | RECQL    | chr12:21501669  | Inverse variance weighted | 6  | 0.001  | 0.030 | 9.834E-01 | 0.998 | cis | Severe COVID-19       |
| 18243_9   | Cytidylate kinase                | UMP-CMP kinase                                                   | P30085 | CMPK1    | chr1:47333790   | Wald ratio                | 1  | 0.004  | 0.195 | 9.834E-01 | 0.998 | cis | Severe COVID-19       |
| 2602_2    | Angiopoietin-2                   | Angiopoietin-2                                                   | O15123 | ANGPT2   | chr8:6563409    | Inverse variance weighted | 3  | 0.002  | 0.101 | 9.837E-01 | 0.998 | cis | Severe COVID-19       |
| 14688_6   | PTN7                             | Tyrosine-protein phosphatase non-receptor type 7                 | P35236 | PTPN7    | chr1:202161588  | Wald ratio                | 1  | -0.006 | 0.315 | 9.837E-01 | 0.998 | cis | Severe COVID-19       |
| 13657_2   | PNKP                             | Bifunctional polynucleotide phosphatase/kinase                   | Q06760 | PNKP     | chr19:49878351  | Wald ratio                | 1  | 0.003  | 0.147 | 9.839E-01 | 0.998 | cis | Severe COVID-19       |
| 3806_55   | EphA5                            | Ephrin type-A receptor 5                                         | P54756 | EPHA5    | chr4:65670495   | Inverse variance weighted | 3  | -0.002 | 0.122 | 9.840E-01 | 0.998 | cis | Severe COVID-19       |
| 5615_62   | F172A                            | Protein FAM172A                                                  | Q8WUF8 | FAM172A  | chr5:94111699   | Wald ratio                | 1  | 0.004  | 0.218 | 9.856E-01 | 0.998 | cis | Severe COVID-19       |
| 4440_15   | FCRL3                            | Fc receptor-like protein 3                                       | Q96P31 | FCRL3    | chr1:157700769  | Inverse variance weighted | 4  | 0.002  | 0.097 | 9.857E-01 | 0.998 | cis | Severe COVID-19       |
| 14684_17  | CAN2                             | Calpain-2 catalytic subunit                                      | P17655 | CAPN2    | chr1:223701593  | Inverse variance weighted | 3  | -0.002 | 0.117 | 9.858E-01 | 0.998 | cis | Severe COVID-19       |
| 5465_32   | H6ST1                            | Heparan-sulfate 6-O-sulfotransferase 1                           | O60243 | HS6ST1   | chr2:128318868  | Inverse variance weighted | 2  | -0.002 | 0.091 | 9.860E-01 | 0.998 | cis | Severe COVID-19       |
| 19622_7   | Activin A                        | Activin A                                                        | P08476 | INHBA    | chr7:41705834   | Wald ratio                | 1  | -0.005 | 0.274 | 9.860E-01 | 0.998 | cis | Severe COVID-19       |
| 5736_1    | TRML2                            | Trem-like transcript 2 protein                                   | Q5T2D2 | TREML2   | chr6:41201149   | Inverse variance weighted | 5  | -0.001 | 0.040 | 9.866E-01 | 0.998 | cis | Severe COVID-19       |
| 15368_3   | BMPEP                            | BMP-binding endothelial regulator protein                        | Q8N8U9 | BMPEP    | chr7:33904308   | Inverse variance weighted | 3  | 0.002  | 0.105 | 9.867E-01 | 0.998 | cis | Severe COVID-19       |
| 3168_8    | ADAMTS-5                         | A disintegrin and metalloproteinase with thrombospondin motifs 5 | Q9UNA0 | ADAMTSS  | chr21:26967088  | Inverse variance weighted | 5  | -0.001 | 0.052 | 9.872E-01 | 0.998 | cis | Severe COVID-19       |
| 2774_10   | IL-16                            | Interleukin-16                                                   | Q14005 | IL16     | chr15:81159575  | Inverse variance weighted | 10 | 0.000  | 0.027 | 9.873E-01 | 0.998 | cis | Severe COVID-19       |
| 16609_106 | KIRR2                            | Kin of IRRE-like protein 2                                       | Q6UWL6 | KIRREL2  | chr19:35855861  | Inverse variance weighted | 6  | -0.001 | 0.074 | 9.875E-01 | 0.998 | cis | Severe COVID-19       |
| 10565_19  | SLIK3                            | SLIT and NTRK-like protein 3                                     | O94933 | SLITRK3  | chr3:165197109  | Inverse variance weighted | 3  | 0.001  | 0.059 | 9.877E-01 | 0.998 | cis | Severe COVID-19       |
| 2652_15   | suPAR                            | Urokinase plasminogen activator surface receptor                 | Q03405 | PLAUR    | chr19:43670547  | Inverse variance weighted | 2  | 0.002  | 0.121 | 9.887E-01 | 0.998 | cis | Severe COVID-19       |
| 13934_3   | MCF2L                            | Guanine nucleotide exchange factor DBS                           | O15068 | MCF2L    | chr13:112894378 | Wald ratio                | 1  | 0.001  | 0.071 | 9.888E-01 | 0.998 | cis | Severe COVID-19       |
| 19130_81  | SPB8                             | Serpin B8                                                        | P50452 | SERPINB8 | chr18:63970029  | Inverse variance weighted | 3  | -0.001 | 0.104 | 9.899E-01 | 0.998 | cis | Severe COVID-19       |
| 15525_294 | ADH1G                            | Alcohol dehydrogenase 1C                                         | P00326 | ADH1C    | chr4:99352746   | Wald ratio                | 1  | -0.001 | 0.116 | 9.901E-01 | 0.998 | cis | Severe COVID-19       |
| 19113_66  | SH3L2                            | SH3 domain-binding glutamic acid-rich-like protein 2             | Q9UICS | SH3BGLR2 | chr6:79631329   | Wald ratio                | 1  | -0.002 | 0.144 | 9.913E-01 | 0.998 | cis | Severe COVID-19       |
| 16823_75  | APOL3                            | Apolipoprotein L3                                                | O95236 | APOL3    | chr22:36166177  | Inverse variance weighted | 7  | 0.000  | 0.033 | 9.920E-01 | 0.998 | cis | Severe COVID-19       |
| 3309_2    | FCG2A                            | Low affinity immunoglobulin gamma Fc region receptor II-a        | P12318 | FCGR2A   | chr1:161505430  | Inverse variance weighted | 4  | 0.001  | 0.103 | 9.921E-01 | 0.998 | cis | Severe COVID-19       |
| 12348_46  | SYSM                             | Serine--tRNA ligase, mitochondrial                               | Q9NP81 | BMPEP    | chr19:38930763  | Wald ratio                | 1  | 0.001  | 0.135 | 9.922E-01 | 0.998 | cis | Severe COVID-19       |
| 13130_150 | HXK2                             | Hexokinase-2                                                     | P52789 | HK2      | chr2:74834127   | Inverse variance weighted | 2  | -0.002 | 0.186 | 9.925E-01 | 0.998 | cis | Severe COVID-19       |
| 15300_66  | CC134                            | Coiled-coil domain-containing protein 134                        | Q9H6E4 | CCDC134  | chr22:41800679  | Inverse variance weighted | 2  | -0.001 | 0.134 | 9.928E-01 | 0.998 | cis | Severe COVID-19       |
| 3516_60   | SDF-1                            | Stromal cell-derived factor 1                                    | P48061 | CXCL12   | chr10:44386493  | Inverse variance weighted | 2  | -0.001 | 0.125 | 9.932E-01 | 0.998 | cis | Severe COVID-19       |
| 16607_78  | Gelsolin                         | Gelsolin                                                         | P06396 | GSN      | chr9:121207794  | Inverse variance weighted | 2  | -0.002 | 0.227 | 9.934E-01 | 0.998 | cis | Severe COVID-19       |
| 4187_49   | 6-Phosphogluconate dehydrogenase | 6-phosphogluconate dehydrogenase, decarboxylating                | P52209 | PGD      | chr1:10398592   | Wald ratio                | 1  | 0.002  | 0.198 | 9.936E-01 | 0.998 | cis | Severe COVID-19       |
| 7810_20   | C1QTNF5                          | Complement C1q tumor necrosis factor-related protein 5           | Q9BXU0 | C1QTNF5  | chr11:119340940 | Inverse variance weighted | 2  | -0.001 | 0.067 | 9.938E-01 | 0.998 | cis | Severe COVID-19       |
| 13460_4   | CHAD                             | Chondroadherin                                                   | O15335 | CHAD     | chr17:50468906  | Wald ratio                | 1  | 0.002  | 0.297 | 9.940E-01 | 0.998 | cis | Severe COVID-19       |
| 14134_49  | AMG02                            | Amphoterin-induced protein 2                                     | Q86512 | AMIG02   | chr12:47079959  | Inverse variance weighted | 3  | 0.001  | 0.139 | 9.940E-01 | 0.998 | cis | Severe COVID-19       |
| 8351_17   | PRSS57                           | Serine protease 57                                               | Q6UWY2 | PRSS57   | chr19:695498    | Inverse variance weighted | 6  | 0.000  | 0.066 | 9.944E-01 | 0.998 | cis | Severe COVID-19       |
| 8960_3    | LRAP                             | Endoplasmic reticulum aminopeptidase 2                           | Q6P179 | ERAP2    | chr5:96875986   | Inverse variance weighted | 4  | 0.000  | 0.040 | 9.946E-01 | 0.998 | cis | Severe COVID-19       |
| 4549_78   | FUT5                             | Alpha-(1,3)-fucosyltransferase 5                                 | Q11128 | FUT5     | chr15:5870540   | Inverse variance weighted | 7  | 0.000  | 0.026 | 9.953E-01 | 0.998 | cis | Severe COVID-19       |
| 17343_6   | SNPH                             | Syntrophin                                                       | O15079 | SNPH     | chr20:1266280   | Inverse variance weighted | 2  | -0.001 | 0.174 | 9.959E-01 | 0.998 | cis | Severe COVID-19       |
| 12573_80  | TRIM3                            | Tripartite motif-containing protein 3                            | O75382 | TRIM3    | chr11:6474459   | Wald ratio                | 1  | -0.001 | 0.183 | 9.962E-01 | 0.998 | cis | Severe COVID-19       |
| 5637_81   | NTNG1                            | Netrin-G1                                                        | Q9Y212 | NTNG1    | chr1:107140007  | Inverse variance weighted | 9  | 0.000  | 0.030 | 9.962E-01 | 0.998 | cis | Severe COVID-19       |
| 13733_5   | IL-12 p40                        | Interleukin-12 subunit beta                                      | P29460 | IL12B    | chr5:159330863  | Inverse variance weighted | 6  | 0.000  | 0.036 | 9.963E-01 | 0.998 | cis | Severe COVID-19       |
| 7866_11   | DJC30                            | DnaJ homolog subfamily C member 30                               | Q96L19 | DNAJC30  | chr7:73683453   | Inverse variance weighted | 2  | 0.000  | 0.102 | 9.965E-01 | 0.998 | cis | Severe COVID-19       |
| 17410_5   | CETN3                            | Centrin-3                                                        | O15182 | CETN3    | chr5:90409766   | Wald ratio                | 1  | -0.001 | 0.212 | 9.967E-01 | 0.998 | cis | Severe COVID-19       |
| 16805_5   | PDE5A                            | cGMP-specific 3',5'-cyclic phosphodiesterase                     | O76074 | PDE5A    | chr4:119628804  | Wald ratio                | 1  | 0.002  | 0.385 | 9.967E-01 | 0.998 | cis | Severe COVID-19       |
| 19154_41  | Protease nexin I                 | Glia-derived nexin                                               | P07093 | SERPINE2 | chr2:224039318  | Inverse variance weighted | 8  | 0.000  | 0.034 | 9.967E-01 | 0.998 | cis | Severe COVID-19       |
| 17677_47  | BY55                             | CD160 antigen                                                    | O95971 | CD160    | chr1:145719471  | Wald ratio                | 1  | 0.000  | 0.137 | 9.972E-01 | 0.998 | cis | Severe COVID-19       |
| 3220_40   | RET                              | Proto-oncogene tyrosine-protein kinase receptor Ret              | P07949 | RET      | chr10:43077064  | Inverse variance weighted | 4  | 0.000  | 0.057 | 9.991E-01 | 0.999 | cis | Severe COVID-19       |
| 9253_52   | BGAT                             | Histo-blood group ABO system transferase                         | P16442 | ABO      | chr9:133276024  | Inverse variance weighted | 12 | 0.083  | 0.016 | 5.147E-07 | 0.001 | cis | Hospitalized COVID-19 |
| 13992_12  | NSF                              | Vesicle-fusing ATPase                                            | P46459 | NSF      | chr17:46590669  | Wald ratio                | 1  | -0.607 | 0.138 | 1.107E-05 | 0.009 | cis | Hospitalized COVID-19 |
| 12656_1   | KLC1                             | Kinesin light chain 1                                            | Q07866 | KLC1     | chr14:103561896 | Wald ratio                | 1  | 0.492  | 0.116 | 2.148E-05 | 0.011 | cis | Hospitalized COVID-19 |
| 2580_83   | Myeloperoxidase                  | Myeloperoxidase                                                  | P05164 | MPO      | chr17:58280935  | Inverse variance weighted | 7  | -0.127 | 0.030 | 2.712E-05 | 0.011 | cis | Hospitalized COVID-19 |
| 17769_28  | PCNP                             | PEST proteolytic signal-containing nuclear protein               | Q8WW12 | PCNP     | chr3:101574180  | Wald ratio                | 1  | -0.479 | 0.117 | 4.237E-05 | 0.014 | cis | Hospitalized COVID-19 |
| 12534_10  | CAC02                            | Calcium-binding and coiled-coil domain-containing protein 2      | Q13137 | CALCOCO2 | chr17:48831018  | Wald ratio                | 1  | -0.451 | 0.116 | 1.041E-04 | 0.029 | cis | Hospitalized COVID-19 |
| 10346_5   | STAT3                            | Signal transducer and activator of transcription 3               | P40763 | STAT3    | chr17:42388540  | Inverse variance weighted | 2  | -0.303 | 0.080 | 1.497E-04 | 0.035 | cis | Hospitalized COVID-19 |
| 8255_34   | MRV1                             | Protein MRV1                                                     | Q9Y6F6 | IRAG1    | chr11:10693988  | Inverse variance weighted | 2  | -0.319 | 0.085 | 1.678E-04 | 0.035 | cis | Hospitalized COVID-19 |
| 15607_56  | KPYR                             | Pyruvate kinase PKLR                                             | P30613 | PKLR     | chr1:155301438  | Wald ratio                | 1  | -0.303 | 0.085 | 3.601E-04 | 0.067 | cis | Hospitalized COVID-19 |
| 13130_150 | HXK2                             | Hexokinase-2                                                     | P52789 | HK2      | chr2:74834127   | Inverse variance weighted | 2  | -0.434 | 0.128 | 7.207E-04 | 0.111 | cis | Hospitalized COVID-19 |
| 4125_52   | sRAGE                            | Advanced glycosylation end product-specific receptor, soluble    | Q15109 | AGER     | chr6:32184322   | Inverse variance weighted | 2  | 0.163  | 0.048 | 7.217E-04 | 0.111 | cis | Hospitalized COVID-19 |
| 12387_7   | PDL14                            | PDZ and LIM domain protein 4                                     | P50479 | PDLIM4   | chr5:132257696  | Wald ratio                | 1  | -0.208 | 0.063 | 1.010E-03 | 0.142 | cis | Hospitalized COVID-19 |
| 9638_2    | TIGIT                            | T-cell immunoreceptor with Ig and ITIM domains                   | Q495A1 | TIGIT    | chr3:114276913  | Wald ratio                | 1  | -0.432 | 0.133 | 1.173E-03 | 0.152 | cis | Hospitalized COVID-19 |
| 4541_49   | CDON                             | Cell adhesion molecule-related/down-regulated by oncogenes       | Q4KMG0 | CDON     | chr11:126063335 | Inverse variance weighted | 4  | 0.084  | 0.026 | 1.501E-03 | 0.181 | cis | Hospitalized COVID-19 |
| 3348_49   | BMP-1                            | Bone morphogenetic protein 1                                     | P13497 | BMP1     | chr8:22165140   | Wald ratio                | 1  | 0.484  | 0.159 | 2.366E-03 | 0.255 | cis | Hospitalized COVID-19 |
| 5491_12   | Testican-2                       | Testican-2                                                       | Q92563 | SPOCK2   | chr10:72089032  | Wald ratio                | 1  | -0.162 | 0.053 | 2.421E-03 | 0.255 | cis | Hospitalized COVID-19 |
| 18884_22  | DNJB4                            | DnaJ homolog subfamily B member 4                                | Q9UDY4 | DNAJB4   | chr1:77979175   | Inverse variance weighted | 3  | 0.177  | 0.060 | 2.864E-03 | 0.280 | cis | Hospitalized COVID-19 |
| 11543_84  | LIMA1                            | LIM domain and actin-binding protein 1                           | Q9UHB6 | LIMA1    | chr12:50283520  | Wald ratio                | 1  | 0.476  | 0.161 | 3.057E-03 | 0.280 | cis | Hospitalized COVID-19 |
| 5508_62   | Cathepsin D                      | Cathepsin D                                                      | P07339 | CTSD     | chr11:1764573   | Inverse variance weighted | 5  | 0.118  | 0.040 | 3.195E-03 | 0.280 | cis | Hospitalized COVID-19 |
| 15583_18  | FCRLB                            | Fc receptor-like B                                               | Q6BA44 | FCRLB    | chr1:161721544  | Inverse variance weighted | 5  | 0.157  | 0.053 | 3.350E-03 | 0.280 | cis | Hospitalized COVID-19 |
| 6955_68   | SNX1                             | Sorting nexin-1                                                  | Q13596 | SNX1     | chr15:64094123  | Wald ratio                | 1  | -0.228 | 0.078 | 3.486E-03 | 0.280 | cis | Hospitalized COVID-19 |
| 5586_66   | MINP1                            | Multiple inositol polyphosphate phosphatase 1                    | Q9UNW1 | MINP1    | chr10:87504875  | Wald ratio                | 1  | 0.385  | 0.133 | 3.921E-03 | 0.301 | cis | Hospitalized COVID-19 |
| 4155_3    | Tenascin                         | Tenascin                                                         | P24821 | TNC      | chr9:11518207   | Inverse variance weighted | 12 | -0.065 | 0.023 | 4.966E-03 | 0.364 | cis | Hospitalized COVID-19 |
| 8866_53   | QPCTL                            | Glutaminy-peptide cyclotransferase-like protein                  | Q9NXS2 | QPCTL    | chr19:45692403  | Inverse variance weighted | 6  | -0.092 | 0.033 | 5.410E-03 | 0.380 | cis | Hospitalized COVID-19 |
| 5111_15   | NRX38                            | Neurexin-3-beta                                                  | Q9HD85 | NRXN3    | chr14:78170373  | Inverse variance weighted | 2  | -0.443 | 0.160 | 5.660E-03 | 0.382 | cis | Hospitalized COVID-19 |
| 9754_33   | Quinone reductase 2              | Ribosyl[dihydr]nicotinamide dehydrogenase [quinone]              | P16083 | NQO2     | chr6:2987987    | Inverse variance weighted | 8  | 0.048  | 0.018 | 6.974E-03 | 0.453 | cis | Hospitalized COVID-19 |
| 17856_23  | NTSM                             | 5'(3')-deoxyribonucleotidase, mitochondrial                      | Q9NPB1 | NTSM     | chr17:17303335  | Wald ratio                | 1  | -0.231 | 0.086 | 7.484E-03 | 0.468 | cis | Hospitalized COVID-19 |
| 19617_5   | LTB4DH                           | Prostaglandin reductase 1                                        | Q14914 | PTGR1    | chr9:111599893  | Inverse variance weighted | 8  | -0.049 | 0.019 | 7.892E-03 | 0.475 | cis | Hospitalized COVID-19 |
| 4342_10   | siCAM-1                          | Intercellular adhesion molecule 1                                | P05362 | ICAM1    | chr19:10271093  | Inverse variance weighted | 9  | 0.038  | 0.015 | 8.903E-03 | 0.501 | cis | Hospitalized COVID-19 |

|           |                                 |                                                                                                                                    |        |           |                 |                           |    |        |       |           |       |     |                       |
|-----------|---------------------------------|------------------------------------------------------------------------------------------------------------------------------------|--------|-----------|-----------------|---------------------------|----|--------|-------|-----------|-------|-----|-----------------------|
| 5605_77   | MFNG                            | Beta-1,3-N-acetylglucosaminyltransferase manic fringe                                                                              | O00587 | MFNG      | chr22:37486393  | Wald ratio                | 1  | 0.295  | 0.113 | 8.908E-03 | 0.501 | cis | Hospitalized COVID-19 |
| 18899_82  | HDDR3                           | Hepatoma-derived growth factor-related protein 3                                                                                   | Q9Y3E1 | HDDR3     | chr15:83207823  | Wald ratio                | 1  | -0.272 | 0.105 | 9.934E-03 | 0.541 | cis | Hospitalized COVID-19 |
| 2864_2    | MEK1                            | Dual specificity mitogen-activated protein kinase kinase 1                                                                         | Q02750 | MAP2K1    | chr15:66386837  | Wald ratio                | 1  | 0.451  | 0.176 | 1.028E-02 | 0.542 | cis | Hospitalized COVID-19 |
| 4188_1    | Aflatoxin B1 aldehyde reductase | Aflatoxin B1 aldehyde reductase member 2                                                                                           | O43488 | AKR7A2    | chr1:19312144   | Wald ratio                | 1  | 0.170  | 0.067 | 1.146E-02 | 0.586 | cis | Hospitalized COVID-19 |
| 4549_78   | FUT5                            | Alpha-(1,3)-fucosyltransferase 5                                                                                                   | Q11128 | FUT5      | chr19:5870540   | Inverse variance weighted | 7  | -0.044 | 0.017 | 1.181E-02 | 0.586 | cis | Hospitalized COVID-19 |
| 19504_22  | KTHY                            | Thymidylate kinase                                                                                                                 | P23919 | DTYMK     | chr2:241686944  | Inverse variance weighted | 3  | 0.331  | 0.133 | 1.284E-02 | 0.599 | cis | Hospitalized COVID-19 |
| 2731_29   | NADPH-P450 Oxidoreductase       | NADPH-cytochrome P450 reductase                                                                                                    | P16435 | POR       | chr7:75899200   | Inverse variance weighted | 2  | -0.211 | 0.085 | 1.337E-02 | 0.599 | cis | Hospitalized COVID-19 |
| 3206_4    | LYVE1                           | Lymphatic vessel endothelial hyaluronate receptor 1                                                                                | Q9Y5V7 | LYVE1     | chr11:10611689  | Inverse variance weighted | 6  | 0.107  | 0.044 | 1.423E-02 | 0.599 | cis | Hospitalized COVID-19 |
| 17675_17  | ACO13                           | Acyl-coenzyme A thioesterase 13                                                                                                    | Q9NPJ3 | ACOT13    | chr6:24667035   | Inverse variance weighted | 2  | 0.289  | 0.118 | 1.425E-02 | 0.599 | cis | Hospitalized COVID-19 |
| 12801_33  | IRF2                            | Interferon regulatory factor 2                                                                                                     | P14316 | IRF2      | chr4:184474558  | Wald ratio                | 1  | -0.488 | 0.200 | 1.464E-02 | 0.599 | cis | Hospitalized COVID-19 |
| 12386_11  | AMPB                            | Aminopeptidase B                                                                                                                   | Q9H4A4 | RNPEP     | chr1:201982372  | Inverse variance weighted | 5  | 0.074  | 0.031 | 1.511E-02 | 0.599 | cis | Hospitalized COVID-19 |
| 13988_67  | NMRL1                           | NmrA-like family domain-containing protein 1                                                                                       | Q9HBL8 | NMRL1     | chr16:4495763   | Inverse variance weighted | 10 | -0.063 | 0.026 | 1.533E-02 | 0.599 | cis | Hospitalized COVID-19 |
| 6899_37   | PHS2                            | Pterin-4-alpha-carbinolamine dehydratase 2                                                                                         | Q9H0N5 | PCBD2     | chr5:134905120  | Wald ratio                | 1  | 0.695  | 0.287 | 1.536E-02 | 0.599 | cis | Hospitalized COVID-19 |
| 12813_18  | EHBP1                           | EH domain-binding protein 1                                                                                                        | Q8NDI1 | EHBP1     | chr2:62673851   | Wald ratio                | 1  | -0.497 | 0.206 | 1.559E-02 | 0.599 | cis | Hospitalized COVID-19 |
| 17447_52  | SFRP4                           | Secreted frizzled-related protein 4                                                                                                | Q6FHJ7 | SFRP4     | chr7:38025695   | Inverse variance weighted | 2  | -0.110 | 0.046 | 1.595E-02 | 0.599 | cis | Hospitalized COVID-19 |
| 3866_7    | SBD5                            | Ribosome maturation protein SBD5                                                                                                   | Q9Y3A5 | SBD5      | chr7:66995693   | Wald ratio                | 1  | 0.202  | 0.084 | 1.610E-02 | 0.599 | cis | Hospitalized COVID-19 |
| 9837_60   | NAD(P)H dehydrogenase           | NAD(P)H dehydrogenase [quinone] 1                                                                                                  | P15559 | NQO1      | chr16:69726668  | Inverse variance weighted | 9  | -0.039 | 0.016 | 1.706E-02 | 0.599 | cis | Hospitalized COVID-19 |
| 7916_10   | S100A7                          | Protein S100-A7                                                                                                                    | P31151 | S100A7    | chr1:153460651  | Inverse variance weighted | 7  | 0.043  | 0.018 | 1.748E-02 | 0.599 | cis | Hospitalized COVID-19 |
| 4479_14   | C1-Esterase Inhibitor           | Plasma protease C1 inhibitor                                                                                                       | P05155 | SERPINC1  | chr11:57597387  | Inverse variance weighted | 6  | -0.061 | 0.026 | 1.755E-02 | 0.599 | cis | Hospitalized COVID-19 |
| 3003_29   | Nkp30                           | Natural cytotoxicity triggering receptor 3                                                                                         | O14931 | NCR3      | chr6:31593006   | Wald ratio                | 1  | 0.327  | 0.138 | 1.768E-02 | 0.599 | cis | Hospitalized COVID-19 |
| 10037_98  | SIG12:lg-like V-type 2          | Sialic acid-binding lg-like lectin 12:lg-like V-type 2 domain, Isoform long                                                        | Q96PQ1 | SIGLEC12  | chr19:51501800  | Inverse variance weighted | 4  | -0.094 | 0.040 | 1.774E-02 | 0.599 | cis | Hospitalized COVID-19 |
| 10754_113 | Prokineticin-2                  | Prokineticin-2                                                                                                                     | Q9HC23 | PROK2     | chr3:71785206   | Inverse variance weighted | 6  | -0.057 | 0.024 | 1.887E-02 | 0.611 | cis | Hospitalized COVID-19 |
| 3415_61   | BSP                             | Bone sialoprotein 2                                                                                                                | P21815 | IBSP      | chr4:87799554   | Wald ratio                | 1  | -0.234 | 0.100 | 1.891E-02 | 0.611 | cis | Hospitalized COVID-19 |
| 6605_17   | IGFALS                          | Insulin-like growth factor-binding protein complex acid labile subunit                                                             | P35858 | IGFALS    | chr16:1794971   | Inverse variance weighted | 3  | -0.159 | 0.068 | 1.990E-02 | 0.611 | cis | Hospitalized COVID-19 |
| 10554_23  | BGAL                            | Beta-galactosidase                                                                                                                 | P16278 | GLB1      | chr3:33097202   | Wald ratio                | 1  | 0.588  | 0.253 | 2.027E-02 | 0.611 | cis | Hospitalized COVID-19 |
| 3421_54   | CD30 Ligand                     | Tumor necrosis factor ligand superfamily member 8                                                                                  | P32971 | TNFSF8    | chr9:114930595  | Inverse variance weighted | 2  | -0.158 | 0.068 | 2.030E-02 | 0.611 | cis | Hospitalized COVID-19 |
| 11103_24  | HSP 27                          | Heat shock protein beta-1                                                                                                          | P04792 | HSPB1     | chr7:76302673   | Inverse variance weighted | 4  | -0.068 | 0.029 | 2.058E-02 | 0.611 | cis | Hospitalized COVID-19 |
| 18832_65  | SAA2                            | Serum amyloid A-2 protein                                                                                                          | P0D1I9 | SAA2      | chr11:18248668  | Wald ratio                | 1  | -0.513 | 0.222 | 2.072E-02 | 0.611 | cis | Hospitalized COVID-19 |
| 19383_131 | CINP                            | Cyclin-dependent kinase 2-interacting protein                                                                                      | Q9BW66 | CINP      | chr14:102362916 | Wald ratio                | 1  | 0.436  | 0.189 | 2.101E-02 | 0.611 | cis | Hospitalized COVID-19 |
| 9173_21   | PGM1                            | Phosphoglucomutase-1                                                                                                               | P36871 | PGM1      | chr1:63593411   | Inverse variance weighted | 2  | 0.221  | 0.096 | 2.165E-02 | 0.617 | cis | Hospitalized COVID-19 |
| 2700_56   | Protein S                       | Vitamin K-dependent protein S                                                                                                      | P07225 | PROS1     | chr3:93980003   | Wald ratio                | 1  | -0.399 | 0.174 | 2.194E-02 | 0.617 | cis | Hospitalized COVID-19 |
| 19197_95  | THIL                            | Acetyl-CoA acetyltransferase, mitochondrial                                                                                        | P24752 | ACAT1     | chr11:108116695 | Inverse variance weighted | 2  | 0.299  | 0.131 | 2.312E-02 | 0.640 | cis | Hospitalized COVID-19 |
| 13940_19  | IP16:HIN 1                      | Gamma-interferon-inducible protein 16:Isoform 2, Hematopoietic expression, interferon-inducible nature, and nuclear localization 1 | Q16666 | IFI16     | chr1:158999968  | Wald ratio                | 1  | 0.349  | 0.155 | 2.399E-02 | 0.653 | cis | Hospitalized COVID-19 |
| 11237_49  | PCOC1                           | Procollagen C-endopeptidase enhancer 1                                                                                             | Q15113 | PCOLCE    | chr7:100602363  | Wald ratio                | 1  | 0.567  | 0.252 | 2.455E-02 | 0.657 | cis | Hospitalized COVID-19 |
| 13590_1   | ORN                             | Oligoribonuclease, mitochondrial                                                                                                   | Q9Y388 | REXO2     | chr11:114439435 | Wald ratio                | 1  | -0.195 | 0.087 | 2.511E-02 | 0.657 | cis | Hospitalized COVID-19 |
| 4459_68   | PCSK7                           | Proprotein convertase subtilisin/kexin type 7                                                                                      | Q16549 | PCSK7     | chr11:117232525 | Inverse variance weighted | 10 | -0.058 | 0.026 | 2.530E-02 | 0.657 | cis | Hospitalized COVID-19 |
| 12432_23  | CYBP                            | Calycylin-binding protein                                                                                                          | Q9HB71 | CACYBP    | chr1:174999163  | Wald ratio                | 1  | -0.165 | 0.074 | 2.588E-02 | 0.658 | cis | Hospitalized COVID-19 |
| 18188_12  | GATM                            | Glycine amidinotransferase, mitochondrial                                                                                          | P50440 | GATM      | chr15:45402327  | Wald ratio                | 1  | -0.132 | 0.059 | 2.621E-02 | 0.658 | cis | Hospitalized COVID-19 |
| 18382_109 | Catechol O-methyltransferase    | Catechol O-methyltransferase                                                                                                       | P21964 | COMT      | chr22:19941371  | Wald ratio                | 1  | -0.256 | 0.115 | 2.653E-02 | 0.658 | cis | Hospitalized COVID-19 |
| 5744_12   | CAO56                           | Protein MENT                                                                                                                       | Q98UN1 | MENT      | chr1:151047751  | Inverse variance weighted | 2  | -0.273 | 0.124 | 2.777E-02 | 0.669 | cis | Hospitalized COVID-19 |
| 19273_3   | Glutathione reductase           | Glutathione reductase, mitochondrial                                                                                               | P00390 | GSR       | chr8:30727846   | Inverse variance weighted | 3  | -0.172 | 0.078 | 2.814E-02 | 0.669 | cis | Hospitalized COVID-19 |
| 5316_54   | Prothrombin                     | Prothrombin                                                                                                                        | P00734 | F2        | chr11:46719196  | Wald ratio                | 1  | 0.417  | 0.190 | 2.862E-02 | 0.669 | cis | Hospitalized COVID-19 |
| 2843_13   | SPINT2                          | Kunitz-type protease inhibitor 2                                                                                                   | O43291 | SPINT2    | chr19:38244035  | Inverse variance weighted | 7  | -0.060 | 0.027 | 2.923E-02 | 0.669 | cis | Hospitalized COVID-19 |
| 9790_28   | BR serine/threonine kinase 2    | Serine/threonine-protein kinase BRSK2                                                                                              | Q8IWQ3 | BRSK2     | chr11:1389899   | Inverse variance weighted | 2  | -0.136 | 0.063 | 2.964E-02 | 0.669 | cis | Hospitalized COVID-19 |
| 9002_36   | SPA11                           | Serpin A11                                                                                                                         | Q86U17 | SERPINA11 | chr14:94452800  | Inverse variance weighted | 5  | -0.146 | 0.067 | 2.970E-02 | 0.669 | cis | Hospitalized COVID-19 |
| 10630_5   | HTAI2                           | Oxidoreductase HTATIP2                                                                                                             | Q9BU33 | HTATIP2   | chr11:20363685  | Inverse variance weighted | 9  | -0.058 | 0.027 | 2.973E-02 | 0.669 | cis | Hospitalized COVID-19 |
| 17513_11  | ANX11                           | Annexin A11                                                                                                                        | P50995 | ANXA11    | chr10:80205572  | Inverse variance weighted | 3  | 0.185  | 0.086 | 3.101E-02 | 0.688 | cis | Hospitalized COVID-19 |
| 4500_50   | SCGF-alpha                      | Stem cell growth factor-alpha                                                                                                      | Q9Y240 | CLEC11A   | chr19:50723364  | Inverse variance weighted | 2  | -0.059 | 0.027 | 3.174E-02 | 0.695 | cis | Hospitalized COVID-19 |
| 5825_49   | IFN-g R1                        | Interferon gamma receptor 1                                                                                                        | P15260 | IFNGR1    | chr6:137219449  | Inverse variance weighted | 3  | -0.242 | 0.114 | 3.325E-02 | 0.695 | cis | Hospitalized COVID-19 |
| 5337_64   | B7-2                            | T-lymphocyte activation antigen CD86                                                                                               | P42081 | CD86      | chr3:122055362  | Wald ratio                | 1  | -0.374 | 0.176 | 3.374E-02 | 0.695 | cis | Hospitalized COVID-19 |
| 12449_16  | PPIH                            | Peptidyl-prolyl cis-trans isomerase H                                                                                              | O43447 | PPIH      | chr1:42658335   | Inverse variance weighted | 2  | 0.298  | 0.140 | 3.377E-02 | 0.695 | cis | Hospitalized COVID-19 |
| 5478_50   | PSMA                            | Glutamate carboxypeptidase 2                                                                                                       | Q04609 | FOLH1     | chr11:49208638  | Inverse variance weighted | 2  | -0.142 | 0.067 | 3.412E-02 | 0.695 | cis | Hospitalized COVID-19 |
| 18432_32  | RALB                            | Ras-related protein Ral-B                                                                                                          | P11234 | RALB      | chr2:120240064  | Wald ratio                | 1  | -0.109 | 0.051 | 3.420E-02 | 0.695 | cis | Hospitalized COVID-19 |
| 8337_65   | PTPRU                           | Receptor-type tyrosine-protein phosphatase U                                                                                       | Q92729 | PTPRU     | chr1:29236516   | Inverse variance weighted | 5  | -0.130 | 0.061 | 3.421E-02 | 0.695 | cis | Hospitalized COVID-19 |
| 6342_10   | Nephronectin                    | Nephronectin                                                                                                                       | Q6UXI9 | NPNT      | chr4:105894775  | Inverse variance weighted | 3  | 0.249  | 0.118 | 3.496E-02 | 0.696 | cis | Hospitalized COVID-19 |
| 5636_10   | MFAP4                           | Microfibril-associated glycoprotein 4                                                                                              | P55083 | MFAP4     | chr17:19387190  | Inverse variance weighted | 2  | 0.111  | 0.053 | 3.504E-02 | 0.696 | cis | Hospitalized COVID-19 |
| 15339_32  | COF2                            | Cofilin-2                                                                                                                          | Q9Y281 | COF2      | chr14:34714823  | Wald ratio                | 1  | 0.181  | 0.086 | 3.577E-02 | 0.702 | cis | Hospitalized COVID-19 |
| 8464_31   | RSP04                           | R-spondin-4                                                                                                                        | Q210M5 | RSP04     | chr20:1002311   | Inverse variance weighted | 2  | 0.259  | 0.124 | 3.774E-02 | 0.717 | cis | Hospitalized COVID-19 |
| 8288_27   | b2-Glycoprotein I               | Beta-2-glycoprotein 1                                                                                                              | P02749 | APOH      | chr17:66256525  | Inverse variance weighted | 3  | 0.057  | 0.028 | 3.776E-02 | 0.717 | cis | Hospitalized COVID-19 |
| 7923_41   | SEM4C                           | Semaphorin-4C                                                                                                                      | Q9C0C4 | SEMA4C    | chr2:96870757   | Wald ratio                | 1  | 0.180  | 0.087 | 3.780E-02 | 0.717 | cis | Hospitalized COVID-19 |
| 10440_26  | ACAM:ECD                        | CXADR-like membrane protein:Extracellular domain                                                                                   | Q9H6B4 | CLMP      | chr11:123195248 | Inverse variance weighted | 3  | 0.096  | 0.047 | 3.901E-02 | 0.731 | cis | Hospitalized COVID-19 |
| 15499_11  | Attractin                       | Attractin                                                                                                                          | P75882 | ATRN      | chr20:3471018   | Inverse variance weighted | 5  | -0.083 | 0.041 | 3.949E-02 | 0.732 | cis | Hospitalized COVID-19 |
| 11126_102 | TRIO                            | Triple functional domain protein                                                                                                   | O75962 | TRIO      | chr5:14143342   | Wald ratio                | 1  | -0.471 | 0.231 | 4.132E-02 | 0.758 | cis | Hospitalized COVID-19 |
| 8360_169  | NKp46                           | Natural cytotoxicity triggering receptor 1                                                                                         | O76036 | NCR1      | chr15:54906148  | Wald ratio                | 1  | 0.223  | 0.110 | 4.246E-02 | 0.766 | cis | Hospitalized COVID-19 |
| 9599_6    | PIANP                           | PILR alpha-associated neural protein                                                                                               | Q8IYJ0 | PIANP     | chr12:6700815   | Wald ratio                | 1  | -0.462 | 0.228 | 4.267E-02 | 0.766 | cis | Hospitalized COVID-19 |
| 2611_72   | Dtk                             | Tyrosine-protein kinase receptor TYRO3                                                                                             | Q06418 | TYRO3     | chr15:41557675  | Wald ratio                | 1  | 0.210  | 0.104 | 4.379E-02 | 0.776 | cis | Hospitalized COVID-19 |
| 3855_56   | Peroxiredoxin-1                 | Peroxiredoxin-1                                                                                                                    | Q06830 | PRDX1     | chr1:45542732   | Inverse variance weighted | 2  | -0.182 | 0.090 | 4.422E-02 | 0.776 | cis | Hospitalized COVID-19 |
| 14205_6   | HEX12                           | Protein HEXIM2                                                                                                                     | Q96MH2 | HEXIM2    | chr17:45160700  | Wald ratio                | 1  | 0.448  | 0.223 | 4.463E-02 | 0.776 | cis | Hospitalized COVID-19 |
| 6461_54   | Apo C-III                       | Apolipoprotein C-III                                                                                                               | P02656 | APOC3     | chr11:116829706 | Inverse variance weighted | 2  | -0.260 | 0.131 | 4.634E-02 | 0.792 | cis | Hospitalized COVID-19 |
| 4254_6    | NUDC3                           | NudC domain-containing protein 3                                                                                                   | Q8IVD9 | NUDC3     | chr7:44490658   | Wald ratio                | 1  | 0.304  | 0.153 | 4.713E-02 | 0.792 | cis | Hospitalized COVID-19 |
| 3074_6    | LBP                             | Lipopolysaccharide-binding protein                                                                                                 | P18428 | LBP       | chr20:38346482  | Inverse variance weighted | 5  | -0.049 | 0.025 | 4.768E-02 | 0.792 | cis | Hospitalized COVID-19 |
| 5091_28   | ILT-4                           | Leukocyte immunoglobulin-like receptor subfamily B member 2                                                                        | Q8NA23 | LILRB2    | chr19:54281184  | Inverse variance weighted | 4  | -0.148 | 0.075 | 4.771E-02 | 0.792 | cis | Hospitalized COVID-19 |
| 18830_1   | Omentin                         | Intelectin-1                                                                                                                       | Q8WWA0 | ITLN1     | chr1:160885180  | Wald ratio                | 1  | 0.346  | 0.175 | 4.790E-02 | 0.792 | cis | Hospitalized COVID-19 |
| 13438_115 | CHRD                            | Chordin                                                                                                                            | Q9HX20 | CHRD      | chr3:184380054  | Wald ratio                | 1  | -0.278 | 0.142 | 4.946E-02 | 0.806 | cis | Hospitalized COVID-19 |
| 8768_4    | Bcl-10                          | B-cell lymphoma/leukemia 10                                                                                                        | O95999 | BCL10     | chr1:85276632   | Wald ratio                | 1  | 0.438  | 0.224 | 4.999E-02 | 0.806 | cis | Hospitalized COVID-19 |
| 19560_23  | PLXA4                           | Plexin-A4                                                                                                                          | Q9HCM2 | PLXNA4    | chr7:132648688  | Wald ratio                | 1  | -0.252 | 0.129 | 5.033E-02 | 0.806 | cis | Hospitalized COVID-19 |
| 10339_48  | NSE                             | Gamma-enolase                                                                                                                      | P09104 | ENO2      | chr12:6913745   | Wald ratio                | 1  | 0.186  | 0.096 | 5.204E-02 | 0.806 | cis | Hospitalized COVID-19 |
| 4992_49   | GRN                             | Granulins                                                                                                                          | P28799 | GRN       | chr17:44345246  | Inverse variance weighted | 3  | -0.095 | 0.049 | 5.282E-02 | 0.806 | cis | Hospitalized COVID-19 |

|           |                             |                                                                                                   |        |            |                 |                           |    |        |       |           |       |     |                       |
|-----------|-----------------------------|---------------------------------------------------------------------------------------------------|--------|------------|-----------------|---------------------------|----|--------|-------|-----------|-------|-----|-----------------------|
| 8346_9    | DPP2                        | Dipeptidyl peptidase 2                                                                            | Q9UHL4 | DPP7       | chr9:137118309  | Inverse variance weighted | 8  | -0.067 | 0.035 | 5.294E-02 | 0.806 | cis | Hospitalized COVID-19 |
| 6415_90   | CPN2                        | Carboxypeptidase N subunit 2                                                                      | P22792 | CPN2       | chr3:194351328  | Inverse variance weighted | 6  | 0.071  | 0.037 | 5.412E-02 | 0.806 | cis | Hospitalized COVID-19 |
| 14711_27  | Cystatin M                  | Cystatin-M                                                                                        | Q15828 | CST6       | chr11:66012008  | Wald ratio                | 1  | 0.208  | 0.109 | 5.540E-02 | 0.806 | cis | Hospitalized COVID-19 |
| 17785_11  | RCL                         | 2'-deoxynucleoside 5'-phosphate N-hydrolase 1                                                     | O43598 | DNPH1      | chr6:43229481   | Wald ratio                | 1  | -0.271 | 0.142 | 5.620E-02 | 0.806 | cis | Hospitalized COVID-19 |
| 19267_14  | GL02                        | Hydroxyacylglutathione hydrolase, mitochondrial                                                   | Q16775 | HAGH       | chr16:1827157   | Wald ratio                | 1  | 0.132  | 0.069 | 5.629E-02 | 0.806 | cis | Hospitalized COVID-19 |
| 8248_222  | SG14                        | Sialic acid-binding Ig-like lectin 14                                                             | Q08ET2 | SIGLEC14   | chr19:51646825  | Inverse variance weighted | 3  | 0.164  | 0.086 | 5.641E-02 | 0.806 | cis | Hospitalized COVID-19 |
| 18933_4   | TGM4                        | Protein-glutamine gamma-glutamyltransferase 4                                                     | P49221 | TGM4       | chr3:44874608   | Wald ratio                | 1  | -0.354 | 0.186 | 5.721E-02 | 0.806 | cis | Hospitalized COVID-19 |
| 3366_51   | ECM1                        | Extracellular matrix protein 1                                                                    | Q16610 | ECM1       | chr1:150508062  | Inverse variance weighted | 11 | -0.046 | 0.024 | 5.732E-02 | 0.806 | cis | Hospitalized COVID-19 |
| 8053_16   | DJB14:CD                    | Dnal homolog subfamily B member 14:Cytoplasmic domain                                             | Q8TBM8 | DNAB14     | chr4:99946618   | Wald ratio                | 1  | 0.328  | 0.173 | 5.758E-02 | 0.806 | cis | Hospitalized COVID-19 |
| 15466_30  | CO9A1                       | Collagen alpha-1(X) chain                                                                         | P20849 | COL9A1     | chr6:70303084   | Inverse variance weighted | 2  | 0.221  | 0.116 | 5.780E-02 | 0.806 | cis | Hospitalized COVID-19 |
| 13580_2   | Sperm-associated antigen 2  | UDP-N-acetylhexosamine pyrophosphorylase                                                          | Q16222 | UAP1       | chr1:162561722  | Wald ratio                | 1  | 0.496  | 0.262 | 5.835E-02 | 0.806 | cis | Hospitalized COVID-19 |
| 15584_9   | PHR2                        | Complement factor H-related protein 2                                                             | P36980 | CFHR2      | chr1:196943738  | Inverse variance weighted | 4  | 0.061  | 0.032 | 5.837E-02 | 0.806 | cis | Hospitalized COVID-19 |
| 11387_3   | ATF6B                       | Cyclic AMP-dependent transcription factor ATF-6 beta                                              | Q99941 | ATF6B      | chr6:32128253   | Inverse variance weighted | 3  | -0.177 | 0.093 | 5.853E-02 | 0.806 | cis | Hospitalized COVID-19 |
| 15558_63  | AMPE                        | Glutamyl aminopeptidase                                                                           | Q07075 | ENPEP      | chr4:110365733  | Inverse variance weighted | 8  | 0.054  | 0.028 | 5.862E-02 | 0.806 | cis | Hospitalized COVID-19 |
| 15305_7   | Secretagogin                | Secretagogin                                                                                      | Q76038 | SCGN       | chr6:25652201   | Inverse variance weighted | 2  | 0.272  | 0.144 | 5.870E-02 | 0.806 | cis | Hospitalized COVID-19 |
| 12469_19  | MARE1                       | Microtubule-associated protein RP/EB family member 1                                              | Q15691 | MAPRE1     | chr20:32819954  | Wald ratio                | 1  | -0.365 | 0.193 | 5.879E-02 | 0.806 | cis | Hospitalized COVID-19 |
| 12395_86  | SYDM                        | Aspartate-tRNA ligase, mitochondrial                                                              | Q6PI48 | DARS2      | chr1:173824653  | Wald ratio                | 1  | -0.201 | 0.106 | 5.950E-02 | 0.806 | cis | Hospitalized COVID-19 |
| 15449_33  | TIM-4                       | T-cell immunoglobulin and mucin domain-containing protein 4                                       | Q96H15 | TIMD4      | chr5:156963226  | Inverse variance weighted | 5  | -0.129 | 0.069 | 5.970E-02 | 0.806 | cis | Hospitalized COVID-19 |
| 19206_20  | 8ODP                        | 7,8-dihydro-8-oxoguanine triphosphatase                                                           | P36639 | NUDT1      | chr7:2242226    | Wald ratio                | 1  | 0.182  | 0.098 | 6.296E-02 | 0.843 | cis | Hospitalized COVID-19 |
| 3600_2    | Chitotriosidase-1           | Chitotriosidase-1                                                                                 | Q13231 | CHIT1      | chr1:203273641  | Inverse variance weighted | 6  | 0.035  | 0.019 | 6.459E-02 | 0.858 | cis | Hospitalized COVID-19 |
| 11493_169 | DYL2                        | Dynein light chain 2, cytoplasmic                                                                 | Q96FJ2 | DYNNL2     | chr17:58083419  | Wald ratio                | 1  | -0.368 | 0.201 | 6.668E-02 | 0.877 | cis | Hospitalized COVID-19 |
| 12494_99  | GBRL2                       | Gamma-aminobutyric acid receptor-associated protein-like 2                                        | P60520 | GABARAPL2  | chr16:75566375  | Wald ratio                | 1  | -0.241 | 0.132 | 6.704E-02 | 0.877 | cis | Hospitalized COVID-19 |
| 11568_2   | FKB1B                       | Peptidyl-prolyl cis-trans isomerase FKBP1B                                                        | P68106 | FKBP1B     | chr2:24049701   | Wald ratio                | 1  | 0.165  | 0.090 | 6.773E-02 | 0.879 | cis | Hospitalized COVID-19 |
| 19279_42  | CRBP                        | Retinol-binding protein 1                                                                         | P09455 | RBP1       | chr3:139539829  | Wald ratio                | 1  | 0.283  | 0.156 | 6.890E-02 | 0.881 | cis | Hospitalized COVID-19 |
| 7926_13   | SPIT3                       | Kunitz-type protease inhibitor 3                                                                  | P49223 | SPINT3     | chr20:45515622  | Inverse variance weighted | 4  | 0.123  | 0.067 | 6.917E-02 | 0.881 | cis | Hospitalized COVID-19 |
| 19635_69  | FGL2                        | Fibroleukin                                                                                       | Q14314 | FGL2       | chr7:77199848   | Wald ratio                | 1  | 0.325  | 0.180 | 7.023E-02 | 0.881 | cis | Hospitalized COVID-19 |
| 3044_3    | PARC                        | C-C motif chemokine 18                                                                            | P55774 | CCCL18     | chr17:36064272  | Inverse variance weighted | 3  | 0.211  | 0.117 | 7.033E-02 | 0.881 | cis | Hospitalized COVID-19 |
| 3038_9    | I-TAC                       | C-X-C motif chemokine 11                                                                          | O14625 | CXCL11     | chr4:76041415   | Inverse variance weighted | 4  | -0.107 | 0.060 | 7.189E-02 | 0.881 | cis | Hospitalized COVID-19 |
| 5107_7    | Notch 1                     | Neurogenic locus notch homolog protein 1                                                          | P46531 | NOTCH1     | chr9:136546048  | Inverse variance weighted | 2  | 0.161  | 0.090 | 7.240E-02 | 0.881 | cis | Hospitalized COVID-19 |
| 15398_2   | HERV1                       | FAD-linked sulphydryl oxidase ALR                                                                 | P55789 | GFER       | chr16:1984193   | Wald ratio                | 1  | -0.323 | 0.180 | 7.329E-02 | 0.881 | cis | Hospitalized COVID-19 |
| 17460_51  | Mx1                         | Interferon-induced GTP-binding protein Mx1                                                        | P20591 | MX1        | chr21:41420020  | Inverse variance weighted | 4  | -0.076 | 0.042 | 7.339E-02 | 0.881 | cis | Hospitalized COVID-19 |
| 9213_24   | FTCD                        | Formimidoyltransferase-cyclodeaminase                                                             | O95954 | FTCD       | chr21:46155579  | Inverse variance weighted | 3  | -0.123 | 0.069 | 7.434E-02 | 0.881 | cis | Hospitalized COVID-19 |
| 2977_7    | EDAR                        | Tumor necrosis factor receptor superfamily member EDAR                                            | Q9UNE0 | EDAR       | chr2:108989372  | Inverse variance weighted | 7  | -0.040 | 0.023 | 7.513E-02 | 0.881 | cis | Hospitalized COVID-19 |
| 6620_82   | LIG01                       | Leucine-rich repeat and immunoglobulin-like domain-containing nogo receptor-interacting protein 1 | Q96FE5 | LINGO1     | chr15:77820900  | Inverse variance weighted | 2  | 0.206  | 0.117 | 7.686E-02 | 0.881 | cis | Hospitalized COVID-19 |
| 12940_35  | AL3B1                       | Aldehyde dehydrogenase family 3 member B1                                                         | P43353 | ALDH3B1    | chr11:68008578  | Wald ratio                | 1  | 0.161  | 0.091 | 7.719E-02 | 0.881 | cis | Hospitalized COVID-19 |
| 8005_1    | MXRA7                       | Matrix-remodeling-associated protein 7                                                            | P84157 | MXRA7      | chr17:76711004  | Inverse variance weighted | 5  | -0.055 | 0.031 | 7.745E-02 | 0.881 | cis | Hospitalized COVID-19 |
| 6930_95   | SIABF                       | Alpha-2,8-sialyltransferase 8F                                                                    | P61647 | ST8SIA6    | chr10:17454595  | Wald ratio                | 1  | -0.365 | 0.207 | 7.750E-02 | 0.881 | cis | Hospitalized COVID-19 |
| 8275_31   | PEAR1:CD                    | Platelet endothelial aggregation receptor 1:Extracellular domain                                  | Q5VV43 | PEAR1      | chr15:156893698 | Inverse variance weighted | 3  | -0.106 | 0.060 | 7.768E-02 | 0.881 | cis | Hospitalized COVID-19 |
| 18875_125 | Chondrocalcin               | Chondrocalcin                                                                                     | P02458 | COL2A1     | chr12:48004554  | Inverse variance weighted | 7  | -0.038 | 0.022 | 7.839E-02 | 0.881 | cis | Hospitalized COVID-19 |
| 5238_26   | PIIE                        | Peptidyl-prolyl cis-trans isomerase E                                                             | Q9UNP9 | PIIE       | chr1:39692182   | Inverse variance weighted | 2  | 0.061  | 0.035 | 7.847E-02 | 0.881 | cis | Hospitalized COVID-19 |
| 18216_22  | IL-11 RA                    | Interleukin-11 receptor subunit alpha                                                             | Q14626 | IL11RA     | chr9:34652162   | Inverse variance weighted | 3  | -0.161 | 0.092 | 8.049E-02 | 0.881 | cis | Hospitalized COVID-19 |
| 9359_9    | EGFL9                       | Protein delta homolog 2                                                                           | Q6UY11 | DLK2       | chr6:43456632   | Wald ratio                | 1  | -0.103 | 0.059 | 8.067E-02 | 0.881 | cis | Hospitalized COVID-19 |
| 14054_17  | IL-15 Ra                    | Interleukin-15 receptor subunit alpha                                                             | Q13261 | IL15RA     | chr10:5978187   | Inverse variance weighted | 5  | 0.043  | 0.024 | 8.110E-02 | 0.881 | cis | Hospitalized COVID-19 |
| 5487_7    | SLAF7                       | SLAM family member 7                                                                              | Q9NQ25 | SLAMF7     | chr1:160739057  | Inverse variance weighted | 7  | 0.040  | 0.023 | 8.128E-02 | 0.881 | cis | Hospitalized COVID-19 |
| 2637_77   | Macrophage mannose receptor | Macrophage mannose receptor 1                                                                     | P22897 | MRC1       | chr10:17809348  | Inverse variance weighted | 8  | 0.069  | 0.039 | 8.130E-02 | 0.881 | cis | Hospitalized COVID-19 |
| 8296_117  | KDEL2                       | KDEL motif-containing protein 2                                                                   | Q724H8 | POGLU2     | chr11:108498405 | Inverse variance weighted | 6  | 0.048  | 0.028 | 8.174E-02 | 0.881 | cis | Hospitalized COVID-19 |
| 3340_53   | TSP4                        | Thrombospondin-4                                                                                  | P35443 | THBS4      | chr5:79991311   | Inverse variance weighted | 3  | -0.076 | 0.044 | 8.335E-02 | 0.881 | cis | Hospitalized COVID-19 |
| 7211_2    | RNase 1                     | Ribonuclease pancreatic                                                                           | P07998 | RNASE1     | chr14:20802855  | Inverse variance weighted | 4  | -0.136 | 0.079 | 8.365E-02 | 0.881 | cis | Hospitalized COVID-19 |
| 12641_3   | ISP2                        | Type II inositol 1,4,5-trisphosphate 5-phosphatase                                                | P32019 | INPP5B     | chr1:37947057   | Inverse variance weighted | 2  | 0.081  | 0.047 | 8.391E-02 | 0.881 | cis | Hospitalized COVID-19 |
| 15503_20  | Lefty-A                     | Left-right determination factor 2                                                                 | O00292 | LEFTY2     | chr1:225941383  | Inverse variance weighted | 10 | 0.042  | 0.024 | 8.399E-02 | 0.881 | cis | Hospitalized COVID-19 |
| 8035_6    | CA198                       | Uncharacterized protein C1orf198                                                                  | Q9H425 | C1orf198   | chr1:230869589  | Wald ratio                | 1  | 0.154  | 0.089 | 8.419E-02 | 0.881 | cis | Hospitalized COVID-19 |
| 12428_2   | LYPL1                       | Lysophospholipase-like protein 1                                                                  | Q5VW22 | LYPLAL1    | chr1:219173869  | Wald ratio                | 1  | 0.172  | 0.100 | 8.432E-02 | 0.881 | cis | Hospitalized COVID-19 |
| 19223_6   | RAB1A                       | Ras-related protein Rab-1A                                                                        | P62820 | RAB1A      | chr2:65130331   | Wald ratio                | 1  | -0.316 | 0.183 | 8.540E-02 | 0.881 | cis | Hospitalized COVID-19 |
| 18916_25  | Inosine triphosphatase      | Inosine triphosphate pyrophosphatase                                                              | Q9BY32 | ITPA       | chr20:3208868   | Inverse variance weighted | 8  | -0.038 | 0.022 | 8.569E-02 | 0.881 | cis | Hospitalized COVID-19 |
| 15513_108 | Prostasin                   | Prostasin                                                                                         | Q16651 | PRSS8      | chr16:31135727  | Inverse variance weighted | 2  | -0.209 | 0.122 | 8.589E-02 | 0.881 | cis | Hospitalized COVID-19 |
| 7849_3    | GlutaminyI cyclase          | GlutaminyI-peptide cyclotransferase                                                               | Q16769 | QPCT       | chr2:37342827   | Inverse variance weighted | 4  | -0.110 | 0.064 | 8.608E-02 | 0.881 | cis | Hospitalized COVID-19 |
| 9244_27   | PPT1                        | Palmitoyl-protein thioesterase 1                                                                  | P50897 | PPT1       | chr1:40097260   | Inverse variance weighted | 2  | 0.080  | 0.047 | 8.624E-02 | 0.881 | cis | Hospitalized COVID-19 |
| 6715_63   | PP8N                        | Alkaline phosphatase, placental-like                                                              | P10696 | ALPG       | chr2:232406844  | Inverse variance weighted | 3  | 0.153  | 0.089 | 8.668E-02 | 0.881 | cis | Hospitalized COVID-19 |
| 18295_102 | GRHPR                       | Glyoxylate reductase/hydroxypyruvate reductase                                                    | Q9UBQ7 | GRHPR      | chr9:37422666   | Inverse variance weighted | 3  | -0.063 | 0.037 | 8.669E-02 | 0.881 | cis | Hospitalized COVID-19 |
| 16304_6   | LGR4                        | Leucine-rich repeat-containing G-protein coupled receptor 4                                       | Q9BXB1 | LGR4       | chr11:27472790  | Inverse variance weighted | 2  | -0.158 | 0.092 | 8.727E-02 | 0.882 | cis | Hospitalized COVID-19 |
| 12975_11  | Keratin 20                  | Keratin, type I cytoskeletal 20                                                                   | P35900 | KRT20      | chr17:40885242  | Inverse variance weighted | 2  | -0.279 | 0.164 | 8.897E-02 | 0.893 | cis | Hospitalized COVID-19 |
| 7933_75   | ADA22                       | Disintegrin and metalloproteinase domain-containing protein 22                                    | Q9P0K1 | ADAM22     | chr7:87934143   | Inverse variance weighted | 4  | -0.065 | 0.039 | 9.005E-02 | 0.899 | cis | Hospitalized COVID-19 |
| 10015_119 | KCAB2                       | Voltage-gated potassium channel subunit beta-2                                                    | Q13303 | KCNAB2     | chr1:5990927    | Inverse variance weighted | 2  | -0.226 | 0.134 | 9.063E-02 | 0.899 | cis | Hospitalized COVID-19 |
| 17691_1   | TPP1                        | Tripeptidyl-peptidase 1                                                                           | O14773 | TPP1       | chr11:6619448   | Inverse variance weighted | 5  | -0.092 | 0.055 | 9.127E-02 | 0.899 | cis | Hospitalized COVID-19 |
| 13119_26  | protein Z inhibitor         | Protein Z-dependent protease inhibitor                                                            | Q9UK55 | SERPINA10  | chr14:94293268  | Inverse variance weighted | 6  | 0.048  | 0.028 | 9.246E-02 | 0.899 | cis | Hospitalized COVID-19 |
| 7228_2    | SIATF                       | Alpha-N-acetylgalactosaminide alpha-2,6-sialyltransferase 6                                       | Q969X2 | ST6GALNAC6 | chr9:127905408  | Inverse variance weighted | 2  | -0.201 | 0.120 | 9.289E-02 | 0.899 | cis | Hospitalized COVID-19 |
| 8250_2    | PTPRJ                       | Receptor-type tyrosine-protein phosphatase eta                                                    | Q12913 | PTPRJ      | chr11:47980425  | Inverse variance weighted | 3  | -0.213 | 0.127 | 9.309E-02 | 0.899 | cis | Hospitalized COVID-19 |
| 13943_38  | DPY30                       | Protein dpy-30 homolog                                                                            | Q9C005 | DPY30      | chr2:32039805   | Wald ratio                | 1  | -0.254 | 0.151 | 9.391E-02 | 0.899 | cis | Hospitalized COVID-19 |
| 15394_79  | UNC5B                       | Netrin receptor UNC5B                                                                             | Q8R121 | UNC5B      | chr10:71212570  | Inverse variance weighted | 3  | 0.123  | 0.074 | 9.415E-02 | 0.899 | cis | Hospitalized COVID-19 |
| 11145_72  | K154L                       | UPF0606 protein KIAA1549L                                                                         | Q6ZV16 | KIAA1549L  | chr11:33376108  | Inverse variance weighted | 7  | -0.050 | 0.030 | 9.500E-02 | 0.899 | cis | Hospitalized COVID-19 |
| 15322_35  | CRADD                       | Death domain-containing protein CRADD                                                             | P78560 | CRADD      | chr12:93677375  | Inverse variance weighted | 2  | 0.360  | 0.216 | 9.501E-02 | 0.899 | cis | Hospitalized COVID-19 |
| 3796_79   | ANGLA                       | Angiopoietin-related protein 4                                                                    | Q9BY76 | ANGPTL4    | chr19:8363289   | Wald ratio                | 1  | 0.184  | 0.111 | 9.722E-02 | 0.899 | cis | Hospitalized COVID-19 |
| 2567_5    | Factor I                    | Complement factor I                                                                               | P05156 | CFI        | chr4:109802150  | Inverse variance weighted | 2  | 0.084  | 0.051 | 9.770E-02 | 0.899 | cis | Hospitalized COVID-19 |
| 15566_10  | Calponin-1                  | Calponin-1                                                                                        | P51911 | CNN1       | chr19:11538767  | Wald ratio                | 1  | 0.134  | 0.081 | 9.804E-02 | 0.899 | cis | Hospitalized COVID-19 |
| 16818_200 | CDCP1                       | CUB domain-containing protein 1                                                                   | Q9H5V8 | CDCP1      | chr3:45146422   | Inverse variance weighted | 3  | -0.064 | 0.039 | 9.822E-02 | 0.899 | cis | Hospitalized COVID-19 |
| 8310_6    | U773                        | Zymogen granule protein 16 homolog B                                                              | Q96DA0 | ZG16B      | chr16:2830253   | Wald ratio                | 1  | 0.107  | 0.065 | 9.836E-02 | 0.899 | cis | Hospitalized COVID-19 |
| 6227_1    | kallikrein 10               | Kallikrein-10                                                                                     | O43240 | KLK10      | chr19:51020175  | Inverse variance weighted | 6  | 0.079  | 0.048 | 9.959E-02 | 0.899 | cis | Hospitalized COVID-19 |
| 3457_57   | Periostin                   | Periostin                                                                                         | Q15063 | POSTN      | chr13:37598844  | Inverse variance weighted | 4  | 0.072  | 0.044 | 9.989E-02 | 0.899 | cis | Hospitalized COVID-19 |

|           |                             |                                                                                             |        |            |                 |                           |    |        |       |           |       |     |                       |
|-----------|-----------------------------|---------------------------------------------------------------------------------------------|--------|------------|-----------------|---------------------------|----|--------|-------|-----------|-------|-----|-----------------------|
| 10772_21  | CGAT2                       | Chondroitin sulfate N-acetylgalactosaminyltransferase 2                                     | Q8N6G5 | CSGALNACT2 | chr10:43138445  | Wald ratio                | 1  | 0.177  | 0.107 | 9.996E-02 | 0.899 | cis | Hospitalized COVID-19 |
| 19482_11  | DHOD3                       | Halooacid dehalogenase-like hydrolase domain-containing protein 3                           | Q9BHS5 | DHOD3      | chr9:113376986  | Wald ratio                | 1  | 0.091  | 0.055 | 1.003E-01 | 0.899 | cis | Hospitalized COVID-19 |
| 6925_26   | SNX8                        | Sorting nexin-8                                                                             | Q9YSX2 | SNX8       | chr7:2354318    | Inverse variance weighted | 2  | 0.097  | 0.059 | 1.008E-01 | 0.899 | cis | Hospitalized COVID-19 |
| 5129_12   | SREC-1                      | Scavenger receptor class F member 1                                                         | Q14162 | SCARF1     | chr17:1645744   | Inverse variance weighted | 5  | 0.043  | 0.026 | 1.014E-01 | 0.899 | cis | Hospitalized COVID-19 |
| 14618_26  | ECOP                        | Vesicular, overexpressed in cancer, prosurvival protein 1                                   | Q96AW1 | VOPP1      | chr7:55572988   | Inverse variance weighted | 2  | -0.147 | 0.090 | 1.018E-01 | 0.899 | cis | Hospitalized COVID-19 |
| 11428_31  | PDL1                        | PDZ and LIM domain protein 1                                                                | Q00151 | PDLIM1     | chr10:95291012  | Wald ratio                | 1  | -0.242 | 0.148 | 1.020E-01 | 0.899 | cis | Hospitalized COVID-19 |
| 9484_75   | Desmoglein-2                | Desmoglein-2                                                                                | Q14126 | DSG2       | chr18:31498177  | Inverse variance weighted | 5  | 0.141  | 0.086 | 1.023E-01 | 0.899 | cis | Hospitalized COVID-19 |
| 16809_1   | NDKM                        | Nucleoside diphosphate kinase, mitochondrial                                                | Q00746 | NME4       | chr16:396725    | Inverse variance weighted | 2  | 0.185  | 0.113 | 1.030E-01 | 0.899 | cis | Hospitalized COVID-19 |
| 9126_171  | NTS03                       | 5'-nucleotidase domain-containing protein 3                                                 | Q86UY8 | NTS0C3     | chr12:103841234 | Inverse variance weighted | 2  | 0.075  | 0.046 | 1.037E-01 | 0.899 | cis | Hospitalized COVID-19 |
| 2974_61   | contactin-1                 | Contactin-1                                                                                 | Q12860 | CNTN1      | chr12:40692439  | Inverse variance weighted | 4  | -0.060 | 0.037 | 1.054E-01 | 0.899 | cis | Hospitalized COVID-19 |
| 15526_33  | GSHB                        | Glutathione synthetase                                                                      | P48637 | GSS        | chr20:34956027  | Inverse variance weighted | 2  | 0.120  | 0.074 | 1.064E-01 | 0.899 | cis | Hospitalized COVID-19 |
| 17419_17  | TES                         | Testin                                                                                      | Q9UGI8 | TES        | chr7:116210506  | Wald ratio                | 1  | -0.219 | 0.135 | 1.066E-01 | 0.899 | cis | Hospitalized COVID-19 |
| 19561_216 | PLXD1                       | Plexin-D1                                                                                   | Q9Y4D7 | PLXND1     | chr3:129606676  | Inverse variance weighted | 4  | 0.075  | 0.046 | 1.068E-01 | 0.899 | cis | Hospitalized COVID-19 |
| 5722_78   | Prolylcarboxypeptidase      | Lysosomal Pro-X carboxypeptidase                                                            | P42785 | PRCP       | chr11:82970584  | Inverse variance weighted | 3  | 0.100  | 0.062 | 1.080E-01 | 0.899 | cis | Hospitalized COVID-19 |
| 12522_6   | RD23B                       | UV excision repair protein RAD23 homolog B                                                  | P54727 | RAD23B     | chr9:107283137  | Wald ratio                | 1  | 0.294  | 0.183 | 1.082E-01 | 0.899 | cis | Hospitalized COVID-19 |
| 5900_11   | HINT1                       | Histidine triad nucleotide-binding protein 1                                                | P49773 | HINT1      | chr5:131224468  | Wald ratio                | 1  | 0.282  | 0.176 | 1.085E-01 | 0.899 | cis | Hospitalized COVID-19 |
| 12396_19  | HIBCH                       | 3-hydroxyisobutyryl-CoA hydrolase, mitochondrial                                            | Q6NVY1 | HIBCH      | chr2:190344193  | Inverse variance weighted | 5  | 0.046  | 0.029 | 1.085E-01 | 0.899 | cis | Hospitalized COVID-19 |
| 13944_3   | SULT1A3                     | Sulfotransferase 1A3                                                                        | P0DMM9 | SULT1A3    | chr16:30199228  | Inverse variance weighted | 4  | 0.150  | 0.093 | 1.085E-01 | 0.899 | cis | Hospitalized COVID-19 |
| 13384_110 | FUMH                        | Fumarate hydratase, mitochondrial                                                           | P07954 | FH         | chr1:241519799  | Wald ratio                | 1  | 0.123  | 0.077 | 1.087E-01 | 0.899 | cis | Hospitalized COVID-19 |
| 17138_8   | GST A1-1                    | Glutathione S-transferase A1                                                                | P08263 | GSTA1      | chr6:52803860   | Inverse variance weighted | 6  | 0.054  | 0.034 | 1.126E-01 | 0.911 | cis | Hospitalized COVID-19 |
| 11656_110 | EVL                         | Ena/VASP-like protein                                                                       | Q9UI08 | EVL        | chr14:99971449  | Inverse variance weighted | 3  | 0.181  | 0.114 | 1.126E-01 | 0.911 | cis | Hospitalized COVID-19 |
| 17756_69  | DCTD                        | Deoxycytidylate deaminase                                                                   | P32321 | DCTD       | chr4:182917936  | Inverse variance weighted | 2  | 0.184  | 0.116 | 1.127E-01 | 0.911 | cis | Hospitalized COVID-19 |
| 7779_86   | CHSTB                       | Carbohydrate sulfotransferase 11                                                            | Q9NPF2 | CHST11     | chr12:104455295 | Inverse variance weighted | 5  | 0.057  | 0.036 | 1.127E-01 | 0.911 | cis | Hospitalized COVID-19 |
| 8759_29   | a1,4-Galactosyltransferase  | Lactosylceramide 4-alpha-galactosyltransferase                                              | Q9NPC4 | AAGALT     | chr22:42721298  | Inverse variance weighted | 4  | 0.046  | 0.029 | 1.134E-01 | 0.911 | cis | Hospitalized COVID-19 |
| 12016_60  | CBL                         | E3 ubiquitin-protein ligase CBL                                                             | P22681 | CBL        | chr11:119206298 | Wald ratio                | 1  | 0.113  | 0.072 | 1.143E-01 | 0.911 | cis | Hospitalized COVID-19 |
| 19254_125 | GMPPR1                      | GMP reductase 1                                                                             | P36959 | GMPPR      | chr6:16238587   | Inverse variance weighted | 8  | -0.025 | 0.016 | 1.151E-01 | 0.911 | cis | Hospitalized COVID-19 |
| 18343_10  | DECR2                       | Peroxisomal 2,4-dienoyl-CoA reductase                                                       | Q9NU11 | DECR2      | chr16:401858    | Inverse variance weighted | 5  | 0.051  | 0.033 | 1.156E-01 | 0.911 | cis | Hospitalized COVID-19 |
| 9384_17   | Cathelicidin peptide        | Cathelicidin antimicrobial peptide                                                          | P49913 | CAMP       | chr3:48223347   | Wald ratio                | 1  | 0.225  | 0.143 | 1.162E-01 | 0.911 | cis | Hospitalized COVID-19 |
| 17821_20  | NMT2                        | Glycylpeptide N-tetradecanoyltransferase 2                                                  | Q60551 | NMT2       | chr10:15168693  | Wald ratio                | 1  | 0.253  | 0.161 | 1.165E-01 | 0.911 | cis | Hospitalized COVID-19 |
| 4978_54   | DBNL                        | Drebrin-like protein                                                                        | Q9UIU6 | DBNL       | chr7:44044640   | Wald ratio                | 1  | 0.262  | 0.167 | 1.168E-01 | 0.911 | cis | Hospitalized COVID-19 |
| 18896_23  | H6ST3                       | Heparan-sulfate 6-O-sulfotransferase 3                                                      | Q8IZP7 | H56ST3     | chr13:96090107  | Wald ratio                | 1  | 0.170  | 0.108 | 1.172E-01 | 0.911 | cis | Hospitalized COVID-19 |
| 2516_57   | 6CKine                      | C-C motif chemokine 21                                                                      | Q00585 | CCl21      | chr9:34710136   | Inverse variance weighted | 2  | 0.210  | 0.134 | 1.172E-01 | 0.911 | cis | Hospitalized COVID-19 |
| 6986_17   | H53S8                       | Heparan sulfate glucosamine 3-O-sulfotransferase 3B1                                        | Q9Y662 | H53ST3B1   | chr17:14301081  | Wald ratio                | 1  | 0.341  | 0.218 | 1.184E-01 | 0.912 | cis | Hospitalized COVID-19 |
| 4234_8    | IL-1 R4                     | Interleukin-1 receptor-like 1                                                               | Q01638 | IL1RL1     | chr2:102311502  | Inverse variance weighted | 8  | -0.037 | 0.024 | 1.184E-01 | 0.912 | cis | Hospitalized COVID-19 |
| 9348_1    | CLRL1                       | Complement C1r subcomponent-like protein                                                    | Q9N2P8 | CLRL       | chr12:7109238   | Wald ratio                | 1  | 0.265  | 0.170 | 1.193E-01 | 0.915 | cis | Hospitalized COVID-19 |
| 18841_1   | SPB13                       | Serpin B13                                                                                  | Q9UIU8 | SERPBN13   | chr18:63586989  | Inverse variance weighted | 4  | 0.081  | 0.052 | 1.202E-01 | 0.918 | cis | Hospitalized COVID-19 |
| 18313_4   | Asparaginase-like protein 1 | Isoaspartyl peptidase/L-asparaginase                                                        | Q7L266 | ASRGL1     | chr11:62337448  | Inverse variance weighted | 2  | -0.076 | 0.049 | 1.216E-01 | 0.924 | cis | Hospitalized COVID-19 |
| 19334_62  | TXD12                       | Thioredoxin domain-containing protein 12                                                    | Q95881 | TXNDC12    | chr1:52055191   | Wald ratio                | 1  | 0.191  | 0.124 | 1.246E-01 | 0.942 | cis | Hospitalized COVID-19 |
| 2741_22   | Siglec-6                    | Sialic acid-binding Ig-like lectin 6                                                        | Q43699 | SIGLEC6    | chr19:51531856  | Inverse variance weighted | 6  | -0.061 | 0.040 | 1.271E-01 | 0.948 | cis | Hospitalized COVID-19 |
| 13929_27  | OCTC                        | Peroxisomal carnitine O-octanoyltransferase                                                 | Q9UKG9 | CROT       | chr7:87345664   | Inverse variance weighted | 6  | -0.049 | 0.032 | 1.272E-01 | 0.948 | cis | Hospitalized COVID-19 |
| 4249_64   | NDP kinase B                | Nucleoside diphosphate kinase B                                                             | P22392 | NME2       | chr8:17576433   | Wald ratio                | 1  | 0.115  | 0.075 | 1.278E-01 | 0.948 | cis | Hospitalized COVID-19 |
| 4982_54   | Elafin                      | Elafin                                                                                      | P19957 | PI3        | chr20:45174902  | Inverse variance weighted | 5  | 0.083  | 0.054 | 1.278E-01 | 0.948 | cis | Hospitalized COVID-19 |
| 9713_67   | PGFRL                       | Platelet-derived growth factor receptor-like protein                                        | Q15198 | PDGFRL     | chr8:17576433   | Inverse variance weighted | 6  | -0.044 | 0.029 | 1.286E-01 | 0.948 | cis | Hospitalized COVID-19 |
| 11540_37  | FOXO3A                      | Forkhead box protein O3                                                                     | Q43524 | FOXO3      | chr6:108559835  | Wald ratio                | 1  | -0.308 | 0.203 | 1.287E-01 | 0.948 | cis | Hospitalized COVID-19 |
| 11241_8   | ARLY                        | Argininosuccinate lyase                                                                     | P04424 | ASL        | chr7:66075800   | Inverse variance weighted | 3  | -0.150 | 0.099 | 1.305E-01 | 0.948 | cis | Hospitalized COVID-19 |
| 2834_54   | kallikrein 8                | Kallikrein-8                                                                                | Q60259 | KLK8       | chr19:51002711  | Wald ratio                | 1  | 0.107  | 0.071 | 1.305E-01 | 0.948 | cis | Hospitalized COVID-19 |
| 11969_5   | S100A2                      | Protein S100-A2                                                                             | P29034 | S100A2     | chr1:153567890  | Wald ratio                | 1  | -0.380 | 0.252 | 1.312E-01 | 0.948 | cis | Hospitalized COVID-19 |
| 8427_118  | RSP03                       | R-spondin-3                                                                                 | Q9BXY4 | RSP03      | chr6:127118671  | Inverse variance weighted | 4  | -0.208 | 0.138 | 1.317E-01 | 0.948 | cis | Hospitalized COVID-19 |
| 18185_118 | ALDOB                       | Fructose-bisphosphate aldolase B                                                            | P05062 | ALDOB      | chr9:101449664  | Inverse variance weighted | 2  | 0.054  | 0.036 | 1.321E-01 | 0.948 | cis | Hospitalized COVID-19 |
| 13463_1   | PXDN                        | Peroxidase homolog                                                                          | Q92626 | PXDN       | chr2:1744852    | Inverse variance weighted | 4  | 0.111  | 0.074 | 1.330E-01 | 0.948 | cis | Hospitalized COVID-19 |
| 16613_3   | CAD17                       | Cadherin-17                                                                                 | Q12864 | CDH17      | chr8:94217303   | Inverse variance weighted | 5  | 0.051  | 0.034 | 1.337E-01 | 0.948 | cis | Hospitalized COVID-19 |
| 9478_69   | KPRA                        | Phosphoribosyl pyrophosphate synthase-associated protein 1                                  | Q14558 | PRPSAP1    | chr17:76384521  | Wald ratio                | 1  | -0.232 | 0.155 | 1.344E-01 | 0.948 | cis | Hospitalized COVID-19 |
| 9834_62   | ADH1B                       | Alcohol dehydrogenase 1B                                                                    | P00325 | ADH1B      | chr4:99352760   | Wald ratio                | 1  | 0.136  | 0.091 | 1.349E-01 | 0.948 | cis | Hospitalized COVID-19 |
| 9341_1    | PDGFD                       | Platelet-derived growth factor D                                                            | Q9GZP0 | PDGFD      | chr11:104164379 | Inverse variance weighted | 3  | -0.166 | 0.112 | 1.368E-01 | 0.948 | cis | Hospitalized COVID-19 |
| 3028_36   | Ck-b-8-1                    | Ck-beta-8-1                                                                                 | P55773 | CLC23      | chr17:36017972  | Inverse variance weighted | 3  | -0.153 | 0.103 | 1.371E-01 | 0.948 | cis | Hospitalized COVID-19 |
| 5078_82   | EphB6                       | Ephrin type-B receptor 6                                                                    | Q15197 | EPHB6      | chr7:142855061  | Inverse variance weighted | 3  | 0.070  | 0.047 | 1.377E-01 | 0.948 | cis | Hospitalized COVID-19 |
| 2890_59   | CCL28                       | C-C motif chemokine 28                                                                      | Q9NRJ3 | CCL28      | chr5:43412391   | Wald ratio                | 1  | -0.315 | 0.213 | 1.381E-01 | 0.948 | cis | Hospitalized COVID-19 |
| 5202_4    | PPID                        | Peptidyl-prolyl cis-trans isomerase D                                                       | Q08752 | PPID       | chr4:158723396  | Inverse variance weighted | 2  | -0.058 | 0.039 | 1.384E-01 | 0.948 | cis | Hospitalized COVID-19 |
| 16558_2   | MYOC                        | Myocilin                                                                                    | Q99972 | MYOC       | chr1:171652688  | Inverse variance weighted | 8  | 0.042  | 0.029 | 1.386E-01 | 0.948 | cis | Hospitalized COVID-19 |
| 4407_10   | MSP                         | Hepatocyte growth factor-like protein                                                       | P26927 | MST1       | chr3:49689501   | Inverse variance weighted | 4  | 0.018  | 0.012 | 1.386E-01 | 0.948 | cis | Hospitalized COVID-19 |
| 9867_23   | F16P2                       | Fructose-1,6-bisphosphatase isozyme 2                                                       | Q00757 | FBP2       | chr9:94593824   | Wald ratio                | 1  | 0.177  | 0.120 | 1.392E-01 | 0.948 | cis | Hospitalized COVID-19 |
| 18337_4   | GMD5                        | GDP-mannose 4,6 dehydratase                                                                 | Q60547 | GMD5       | chr6:2245605    | Wald ratio                | 1  | -0.292 | 0.198 | 1.393E-01 | 0.948 | cis | Hospitalized COVID-19 |
| 12475_48  | CLIC5                       | Chloride intracellular channel protein 5                                                    | Q9NZA1 | CLIC5      | chr6:46080348   | Inverse variance weighted | 5  | 0.066  | 0.045 | 1.393E-01 | 0.948 | cis | Hospitalized COVID-19 |
| 12558_3   | UBS3B                       | Ubiquitin-associated and SH3 domain-containing protein B                                    | Q8TFA2 | UBASH3B    | chr11:122655722 | Inverse variance weighted | 2  | -0.110 | 0.075 | 1.406E-01 | 0.948 | cis | Hospitalized COVID-19 |
| 12498_12  | TX1B3                       | Tax1-binding protein 3                                                                      | Q14907 | TAX1BP3    | chr17:3668679   | Wald ratio                | 1  | 0.169  | 0.116 | 1.429E-01 | 0.948 | cis | Hospitalized COVID-19 |
| 6039_24   | CRHPB                       | Corticotropin-releasing factor-binding protein                                              | P24387 | CRHPB      | chr5:76953045   | Inverse variance weighted | 6  | 0.035  | 0.024 | 1.434E-01 | 0.948 | cis | Hospitalized COVID-19 |
| 2480_58   | TIMP-3                      | Metalloproteinase inhibitor 3                                                               | P35625 | TIMP3      | chr22:32801705  | Inverse variance weighted | 10 | 0.040  | 0.028 | 1.438E-01 | 0.948 | cis | Hospitalized COVID-19 |
| 14006_36  | GNMT                        | Glycine N-methyltransferase                                                                 | Q14749 | GNMT       | chr6:42960754   | Wald ratio                | 1  | -0.133 | 0.091 | 1.441E-01 | 0.948 | cis | Hospitalized COVID-19 |
| 10521_10  | MXRA8-ECD                   | Matrix-remodeling-associated protein 8:Extracellular domain                                 | Q9BRK3 | MXRA8      | chr1:1361777    | Wald ratio                | 1  | -0.158 | 0.109 | 1.451E-01 | 0.948 | cis | Hospitalized COVID-19 |
| 15603_20  | Integrin alpha-2            | Integrin alpha-2                                                                            | P17301 | ITGA2      | chr5:52989340   | Wald ratio                | 1  | 0.160  | 0.110 | 1.453E-01 | 0.948 | cis | Hospitalized COVID-19 |
| 17682_1   | CD46                        | Membrane cofactor protein                                                                   | P15529 | CD46       | chr1:207752037  | Inverse variance weighted | 2  | 0.081  | 0.056 | 1.455E-01 | 0.948 | cis | Hospitalized COVID-19 |
| 3431_54   | EphA1                       | Ephrin type-A receptor 1                                                                    | P21709 | EPHA1      | chr7:143408856  | Inverse variance weighted | 7  | -0.029 | 0.020 | 1.459E-01 | 0.948 | cis | Hospitalized COVID-19 |
| 5810_25   | Cripto                      | Teratocarcinoma-derived growth factor 1                                                     | P13385 | TGDF1      | chr3:46574534   | Inverse variance weighted | 6  | 0.126  | 0.087 | 1.469E-01 | 0.948 | cis | Hospitalized COVID-19 |
| 3605_77   | MASP3:Light                 | Mannan-binding lectin serine protease 1:Mannan-binding lectin serine protease 1 light chain | P48740 | MASP1      | chr3:187291980  | Wald ratio                | 1  | 0.189  | 0.130 | 1.471E-01 | 0.948 | cis | Hospitalized COVID-19 |
| 8859_51   | CAH11                       | Carbonic anhydrase-related protein 11                                                       | O75493 | CA11       | chr19:48646187  | Wald ratio                | 1  | 0.142  | 0.098 | 1.473E-01 | 0.948 | cis | Hospitalized COVID-19 |
| 6359_50   | AGO61                       | Protein O-linked-mannose beta-1,4-N-acetylglucosaminyltransferase 2                         | Q8NA11 | POMGNT2    | chr3:43106085   | Inverse variance weighted | 4  | -0.081 | 0.056 | 1.479E-01 | 0.948 | cis | Hospitalized COVID-19 |
| 3807_1    | FGF23                       | Fibroblast growth factor 23                                                                 | Q9GZV9 | FGF23      | chr12:4379712   | Wald ratio                | 1  | -0.286 | 0.198 | 1.494E-01 | 0.948 | cis | Hospitalized COVID-19 |
| 2620_4    | gp130, soluble              | Interleukin-6 receptor subunit beta                                                         | P40189 | IL6ST      | chr5:55995022   | Inverse variance weighted | 4  | 0.052  | 0.036 | 1.496E-01 | 0.948 | cis | Hospitalized COVID-19 |

|           |                               |                                                                                                         |        |          |                 |                           |    |        |       |           |       |     |                       |
|-----------|-------------------------------|---------------------------------------------------------------------------------------------------------|--------|----------|-----------------|---------------------------|----|--------|-------|-----------|-------|-----|-----------------------|
| 19187_21  | STABP                         | STAM-binding protein                                                                                    | O95630 | STAMPB   | chr2:73828916   | Inverse variance weighted | 2  | 0.213  | 0.149 | 1.508E-01 | 0.948 | cis | Hospitalized COVID-19 |
| 9183_7    | IFN-a/b R1                    | Interferon alpha/beta receptor 1                                                                        | P17181 | IFNAR1   | chr21:33324387  | Inverse variance weighted | 7  | 0.042  | 0.030 | 1.529E-01 | 0.948 | cis | Hospitalized COVID-19 |
| 16055_3   | complement factor H-related 5 | Complement factor H-related protein 5                                                                   | Q9BXR6 | CFHR5    | chr1:196975010  | Inverse variance weighted | 5  | -0.054 | 0.038 | 1.533E-01 | 0.948 | cis | Hospitalized COVID-19 |
| 12571_14  | ARL3                          | ADP-ribosylation factor-like protein 3                                                                  | P36405 | ARL3     | chr10:102714397 | Inverse variance weighted | 2  | 0.095  | 0.067 | 1.541E-01 | 0.948 | cis | Hospitalized COVID-19 |
| 16828_8   | Collagen a1(VI)               | Collagen alpha-1(VI) chain                                                                              | P12109 | COL6A1   | chr21:45981770  | Inverse variance weighted | 10 | -0.028 | 0.020 | 1.550E-01 | 0.948 | cis | Hospitalized COVID-19 |
| 13954_9   | GNA1                          | Glucosamine 6-phosphate N-acetyltransferase                                                             | Q96K66 | GNPNAT1  | chr14:52791668  | Wald ratio                | 1  | -0.255 | 0.180 | 1.556E-01 | 0.948 | cis | Hospitalized COVID-19 |
| 8794_13   | DPEP1                         | Dipeptidase 1                                                                                           | P16444 | DPEP1    | chr16:89613308  | Inverse variance weighted | 6  | 0.046  | 0.032 | 1.563E-01 | 0.948 | cis | Hospitalized COVID-19 |
| 17329_2   | BDH2                          | 3-hydroxybutyrate dehydrogenase type 2                                                                  | Q9BU11 | BDH2     | chr4:103099870  | Inverse variance weighted | 2  | 0.088  | 0.062 | 1.572E-01 | 0.948 | cis | Hospitalized COVID-19 |
| 15298_199 | NETO1                         | Neurophilin and tolloid-like protein 1                                                                  | Q8TDF5 | NETO1    | chr18:72868146  | Inverse variance weighted | 2  | -0.210 | 0.148 | 1.573E-01 | 0.948 | cis | Hospitalized COVID-19 |
| 10702_1   | COSA1                         | Collagen alpha-1(XVII) chain                                                                            | Q2UVO9 | COL28A1  | chr7:7535873    | Wald ratio                | 1  | 0.317  | 0.224 | 1.580E-01 | 0.948 | cis | Hospitalized COVID-19 |
| 9026_40   | BTNL8                         | Butyrophilin-like protein 8                                                                             | Q6UX41 | BTNL8    | chr5:180899077  | Inverse variance weighted | 2  | -0.090 | 0.064 | 1.586E-01 | 0.948 | cis | Hospitalized COVID-19 |
| 15615_8   | LRB3                          | Leukocyte immunoglobulin-like receptor subfamily B member 3                                             | Q75022 | LILRB3   | chr19:54223506  | Inverse variance weighted | 5  | -0.060 | 0.043 | 1.587E-01 | 0.948 | cis | Hospitalized COVID-19 |
| 18312_68  | NDRG3                         | Protein NDRG3                                                                                           | Q9UGV2 | NDRG3    | chr20:36746090  | Inverse variance weighted | 3  | -0.148 | 0.105 | 1.591E-01 | 0.948 | cis | Hospitalized COVID-19 |
| 10833_64  | HHIP                          | Hedgehog-interacting protein                                                                            | Q96QV1 | HHIP     | chr4:144646156  | Inverse variance weighted | 2  | -0.093 | 0.066 | 1.603E-01 | 0.948 | cis | Hospitalized COVID-19 |
| 14012_17  | LGP2                          | Probable ATP-dependent RNA helicase DHX58                                                               | Q96C10 | DHX58    | chr17:42112714  | Inverse variance weighted | 2  | -0.107 | 0.076 | 1.608E-01 | 0.948 | cis | Hospitalized COVID-19 |
| 15441_6   | SAP3                          | Ganglioside GM2 activator                                                                               | P17900 | GM2A     | chr5:151212150  | Inverse variance weighted | 3  | -0.053 | 0.038 | 1.616E-01 | 0.948 | cis | Hospitalized COVID-19 |
| 2631_50   | IL-10 Rb                      | Interleukin-10 receptor subunit beta                                                                    | Q08334 | IL10RB   | chr21:33266367  | Wald ratio                | 1  | 0.232  | 0.166 | 1.619E-01 | 0.948 | cis | Hospitalized COVID-19 |
| 13740_51  | sFRP-3                        | Secreted frizzled-related protein 3                                                                     | Q92765 | FRZB     | chr2:182866637  | Inverse variance weighted | 8  | -0.032 | 0.023 | 1.628E-01 | 0.948 | cis | Hospitalized COVID-19 |
| 2617_56   | ERBB3                         | Receptor tyrosine-protein kinase erbB-3                                                                 | P21860 | ERBB3    | chr12:56076799  | Wald ratio                | 1  | 0.127  | 0.091 | 1.628E-01 | 0.948 | cis | Hospitalized COVID-19 |
| 2950_57   | IGFBP-4                       | Insulin-like growth factor-binding protein 4                                                            | P22692 | IGFBP4   | chr17:40443450  | Wald ratio                | 1  | -0.262 | 0.188 | 1.633E-01 | 0.948 | cis | Hospitalized COVID-19 |
| 11649_3   | SMAP1                         | Stromal membrane-associated protein 1                                                                   | Q8IY85 | SMAP1    | chr6:70667776   | Inverse variance weighted | 4  | -0.049 | 0.035 | 1.635E-01 | 0.948 | cis | Hospitalized COVID-19 |
| 3045_72   | PTN                           | Pleiotrophin                                                                                            | P21246 | PTN      | chr7:137343774  | Inverse variance weighted | 3  | -0.070 | 0.050 | 1.661E-01 | 0.948 | cis | Hospitalized COVID-19 |
| 6151_18   | MP2K3                         | Dual specificity mitogen-activated protein kinase kinase 3                                              | P46734 | MAP2K3   | chr17:21284672  | Wald ratio                | 1  | 0.316  | 0.228 | 1.662E-01 | 0.948 | cis | Hospitalized COVID-19 |
| 5728_60   | FCRL1                         | Fc receptor-like protein 1                                                                              | Q96LA6 | FCRL1    | chr1:157820120  | Inverse variance weighted | 4  | -0.109 | 0.079 | 1.665E-01 | 0.948 | cis | Hospitalized COVID-19 |
| 10781_19  | CLC4G                         | C-type lectin domain family 4 member G                                                                  | Q6UXB4 | CLEC4G   | chr19:7733906   | Wald ratio                | 1  | 0.380  | 0.275 | 1.668E-01 | 0.948 | cis | Hospitalized COVID-19 |
| 7921_65   | FIX1                          | Four-jointed box protein 1                                                                              | Q86V88 | FIX1     | chr11:35618460  | Inverse variance weighted | 4  | 0.055  | 0.040 | 1.680E-01 | 0.948 | cis | Hospitalized COVID-19 |
| 4911_49   | Glutathione S-transferase Pi  | Glutathione S-transferase P                                                                             | P09211 | GSTP1    | chr11:67583742  | Inverse variance weighted | 2  | -0.192 | 0.139 | 1.692E-01 | 0.948 | cis | Hospitalized COVID-19 |
| 9233_71   | TFPI-2                        | Tissue factor pathway inhibitor 2                                                                       | P48307 | TFPI2    | chr7:93890753   | Wald ratio                | 1  | -0.296 | 0.216 | 1.703E-01 | 0.948 | cis | Hospitalized COVID-19 |
| 9995_6    | DUT                           | Deoxyuridine 5'-triphosphate nucleotidohydrolase, mitochondrial                                         | P33316 | DUT      | chr15:48331011  | Wald ratio                | 1  | 0.224  | 0.164 | 1.707E-01 | 0.948 | cis | Hospitalized COVID-19 |
| 12348_46  | SYM                           | Serine-tRNA ligase, mitochondrial                                                                       | Q9NP81 | SARS2    | chr19:38930763  | Wald ratio                | 1  | 0.125  | 0.091 | 1.712E-01 | 0.948 | cis | Hospitalized COVID-19 |
| 14636_25  | Ribonuclease UK114            | Ribonuclease UK114                                                                                      | P52758 | RIDA     | chr8:98117171   | Inverse variance weighted | 3  | -0.071 | 0.052 | 1.712E-01 | 0.948 | cis | Hospitalized COVID-19 |
| 18241_18  | HEM6                          | Oxygen-dependent coproporphyrinogen-III oxidase, mitochondrial                                          | P36551 | CPOX     | chr3:98593648   | Inverse variance weighted | 4  | 0.075  | 0.055 | 1.716E-01 | 0.948 | cis | Hospitalized COVID-19 |
| 14708_59  | C08G                          | Complement component C8 gamma chain                                                                     | P07360 | C8G      | chr9:136945185  | Inverse variance weighted | 5  | 0.093  | 0.068 | 1.716E-01 | 0.948 | cis | Hospitalized COVID-19 |
| 3232_28   | TrATPase                      | Tartrate-resistant acid phosphatase type 5                                                              | P13686 | ACP5     | chr19:11579993  | Inverse variance weighted | 4  | 0.062  | 0.046 | 1.717E-01 | 0.948 | cis | Hospitalized COVID-19 |
| 3461_58   | PCGB                          | Brevican core protein                                                                                   | Q96GW7 | BCAN     | chr1:156641390  | Inverse variance weighted | 2  | 0.069  | 0.051 | 1.728E-01 | 0.948 | cis | Hospitalized COVID-19 |
| 17514_48  | RAB21                         | Ras-related protein Rab-21                                                                              | Q9UL25 | RAB21    | chr12:71754863  | Wald ratio                | 1  | -0.155 | 0.114 | 1.729E-01 | 0.948 | cis | Hospitalized COVID-19 |
| 13682_47  | M-CSF R                       | Macrophage colony-stimulating factor 1 receptor                                                         | P07333 | CSF1R    | chr5:150113372  | Wald ratio                | 1  | -0.216 | 0.159 | 1.736E-01 | 0.948 | cis | Hospitalized COVID-19 |
| 17739_1   | HCDH                          | Hydroxyacyl-coenzyme A dehydrogenase, mitochondrial                                                     | Q16836 | HADH     | chr4:107989714  | Wald ratio                | 1  | -0.200 | 0.147 | 1.737E-01 | 0.948 | cis | Hospitalized COVID-19 |
| 17832_12  | IDI2                          | Isopentenyl-diphosphate delta-isomerase 2                                                               | Q9BX51 | IDI2     | chr10:1025859   | Inverse variance weighted | 2  | 0.089  | 0.066 | 1.747E-01 | 0.948 | cis | Hospitalized COVID-19 |
| 6404_20   | C1QRf                         | C1q-related factor                                                                                      | Q75973 | C1QL1    | chr17:44968303  | Inverse variance weighted | 3  | -0.087 | 0.064 | 1.754E-01 | 0.948 | cis | Hospitalized COVID-19 |
| 2994_71   | IL-1Rrp2                      | Interleukin-1 receptor-like 2                                                                           | Q9HB29 | IL1RL2   | chr2:102187006  | Wald ratio                | 1  | -0.098 | 0.072 | 1.767E-01 | 0.948 | cis | Hospitalized COVID-19 |
| 6629_3    | HBD-1                         | Beta-defensin 1                                                                                         | P60022 | DEFB1    | chr8:6877936    | Inverse variance weighted | 5  | -0.040 | 0.030 | 1.771E-01 | 0.948 | cis | Hospitalized COVID-19 |
| 16916_19  | SLIK6                         | SLIT and NTRK-like protein 6                                                                            | Q9IY57 | SLITRK6  | chr13:85806683  | Inverse variance weighted | 4  | -0.091 | 0.068 | 1.773E-01 | 0.948 | cis | Hospitalized COVID-19 |
| 18162_167 | IRAK4                         | Interleukin-1 receptor-associated kinase 4                                                              | Q9NWZ3 | IRAK4    | chr12:43758944  | Wald ratio                | 1  | -0.173 | 0.129 | 1.781E-01 | 0.948 | cis | Hospitalized COVID-19 |
| 18197_97  | KCR5                          | Creatine kinase S-type, mitochondrial                                                                   | P17540 | CKMT2    | chr5:81233320   | Wald ratio                | 1  | 0.288  | 0.214 | 1.785E-01 | 0.948 | cis | Hospitalized COVID-19 |
| 3316_58   | Heparin cofactor II           | Heparin cofactor 2                                                                                      | P05546 | SERPIND1 | chr22:20774113  | Wald ratio                | 1  | 0.280  | 0.208 | 1.795E-01 | 0.948 | cis | Hospitalized COVID-19 |
| 12329_21  | KS6A1                         | Ribosomal protein S6 kinase alpha-1                                                                     | Q15418 | RP56KA1  | chr1:26529761   | Wald ratio                | 1  | -0.143 | 0.107 | 1.798E-01 | 0.948 | cis | Hospitalized COVID-19 |
| 8006_12   | DIB12                         | Dnal homolog subfamily B member 12                                                                      | Q9NXW2 | DNAIB12  | chr10:72355149  | Wald ratio                | 1  | 0.156  | 0.117 | 1.807E-01 | 0.948 | cis | Hospitalized COVID-19 |
| 3719_2    | p27kip1                       | Cyclin-dependent kinase inhibitor 1B                                                                    | P46527 | CDKN1B   | chr12:12685498  | Wald ratio                | 1  | -0.189 | 0.141 | 1.808E-01 | 0.948 | cis | Hospitalized COVID-19 |
| 15635_4   | SMOC2                         | SPARC-related modular calcium-binding protein 2                                                         | Q9H3U7 | SMOC2    | chr6:168441151  | Inverse variance weighted | 5  | -0.048 | 0.036 | 1.815E-01 | 0.948 | cis | Hospitalized COVID-19 |
| 9249_17   | TMEM9-ECD                     | Transmembrane protein 9:Extracellular domain                                                            | Q9P077 | TMEM9    | chr1:201171574  | Wald ratio                | 1  | -0.214 | 0.160 | 1.819E-01 | 0.948 | cis | Hospitalized COVID-19 |
| 7049_2    | ADAM 23                       | Disintegrin and metalloproteinase domain-containing protein 23                                          | Q75077 | ADAM23   | chr2:206443532  | Inverse variance weighted | 6  | 0.022  | 0.017 | 1.826E-01 | 0.948 | cis | Hospitalized COVID-19 |
| 12556_7   | UBE2C                         | Ubiquitin-conjugating enzyme E2 C                                                                       | O00762 | UBE2C    | chr20:45812576  | Inverse variance weighted | 2  | 0.123  | 0.093 | 1.829E-01 | 0.948 | cis | Hospitalized COVID-19 |
| 8100_15   | ADM2                          | ADM2                                                                                                    | Q724H4 | ADM2     | chr22:50481543  | Wald ratio                | 1  | 0.288  | 0.216 | 1.829E-01 | 0.948 | cis | Hospitalized COVID-19 |
| 3773_15   | sTie-2                        | Angiopoietin-1 receptor, soluble                                                                        | Q02763 | TEK      | chr9:27109141   | Inverse variance weighted | 4  | 0.065  | 0.049 | 1.840E-01 | 0.948 | cis | Hospitalized COVID-19 |
| 2968_61   | TNFSF15                       | Tumor necrosis factor ligand superfamily member 15                                                      | O95150 | TNFSF15  | chr9:114806039  | Wald ratio                | 1  | -0.251 | 0.189 | 1.845E-01 | 0.948 | cis | Hospitalized COVID-19 |
| 5000_52   | LG3BP                         | Galectin-3-binding protein                                                                              | Q08380 | LGALS3BP | chr17:78979947  | Inverse variance weighted | 3  | -0.102 | 0.077 | 1.846E-01 | 0.948 | cis | Hospitalized COVID-19 |
| 18871_24  | AIF1L                         | Allograft inflammatory factor 1-like                                                                    | Q9BQ10 | AIF1L    | chr9:131096476  | Inverse variance weighted | 5  | -0.045 | 0.034 | 1.854E-01 | 0.948 | cis | Hospitalized COVID-19 |
| 15582_25  | FCN1                          | Ficolin-1                                                                                               | O00602 | FCN1     | chr9:134917912  | Inverse variance weighted | 5  | 0.048  | 0.036 | 1.871E-01 | 0.948 | cis | Hospitalized COVID-19 |
| 3213_65   | Nidogen                       | Nidogen-1                                                                                               | P14543 | NID1     | chr1:236065109  | Inverse variance weighted | 4  | 0.083  | 0.063 | 1.876E-01 | 0.948 | cis | Hospitalized COVID-19 |
| 9322_15   | RCN1                          | Reticulocalbin-1                                                                                        | Q15293 | RCN1     | chr11:32091074  | Wald ratio                | 1  | -0.103 | 0.079 | 1.881E-01 | 0.948 | cis | Hospitalized COVID-19 |
| 3216_2    | PIGR                          | Polymeric immunoglobulin receptor                                                                       | P01833 | PIGR     | chr1:206946466  | Wald ratio                | 1  | 0.202  | 0.154 | 1.887E-01 | 0.948 | cis | Hospitalized COVID-19 |
| 6626_81   | CHSTC                         | Carbohydrate sulfotransferase 12                                                                        | Q9NRR3 | CHST12   | chr7:2403588    | Inverse variance weighted | 2  | -0.073 | 0.056 | 1.898E-01 | 0.948 | cis | Hospitalized COVID-19 |
| 8840_61   | C1s                           | Complement C1s subcomponent                                                                             | P09871 | C1S      | chr12:6988259   | Inverse variance weighted | 4  | 0.118  | 0.090 | 1.901E-01 | 0.948 | cis | Hospitalized COVID-19 |
| 9765_4    | NDE1                          | Nuclear distribution protein nudf homolog 1                                                             | Q9NXR1 | NDE1     | chr16:15643267  | Wald ratio                | 1  | 0.191  | 0.146 | 1.909E-01 | 0.948 | cis | Hospitalized COVID-19 |
| 15427_35  | LOXL3                         | Lysyl oxidase homolog 3                                                                                 | P58215 | LOXL3    | chr2:74555690   | Wald ratio                | 1  | -0.155 | 0.119 | 1.912E-01 | 0.948 | cis | Hospitalized COVID-19 |
| 2190_55   | Coagulation Factor XI         | Coagulation Factor XI                                                                                   | P03951 | F11      | chr4:186266189  | Inverse variance weighted | 4  | -0.053 | 0.041 | 1.915E-01 | 0.948 | cis | Hospitalized COVID-19 |
| 9312_8    | AZGP1                         | Zinc-alpha-2-glycoprotein                                                                               | P25311 | AZGP1    | chr7:99976042   | Inverse variance weighted | 3  | -0.227 | 0.174 | 1.916E-01 | 0.948 | cis | Hospitalized COVID-19 |
| 8007_19   | Cathepsin B                   | Cathepsin B                                                                                             | P07858 | CTSB     | chr8:11869533   | Inverse variance weighted | 6  | 0.029  | 0.022 | 1.918E-01 | 0.948 | cis | Hospitalized COVID-19 |
| 18215_5   | THG1                          | Probable tRNA(His) guanylyltransferase                                                                  | Q9NWV6 | THG1L    | chr5:157731420  | Inverse variance weighted | 3  | -0.034 | 0.026 | 1.940E-01 | 0.948 | cis | Hospitalized COVID-19 |
| 9962_1    | MUCDL                         | Cadherin-related family member 5                                                                        | Q9HB88 | CDHR5    | chr11:626078    | Wald ratio                | 1  | -0.236 | 0.182 | 1.950E-01 | 0.948 | cis | Hospitalized COVID-19 |
| 7905_30   | HPT                           | Haptoglobin isoform 2                                                                                   | P00738 | HP       | chr16:72054505  | Wald ratio                | 1  | 0.053  | 0.041 | 1.950E-01 | 0.948 | cis | Hospitalized COVID-19 |
| 19176_27  | FA49B                         | Protein FAM49B                                                                                          | Q9NUQ9 | CYRIB    | chr8:130017504  | Wald ratio                | 1  | 0.282  | 0.217 | 1.951E-01 | 0.948 | cis | Hospitalized COVID-19 |
| 16856_79  | MARE2                         | Microtubule-associated protein RP/EB family member 2                                                    | Q15555 | MAPRE2   | chr18:34976928  | Wald ratio                | 1  | -0.088 | 0.068 | 1.957E-01 | 0.948 | cis | Hospitalized COVID-19 |
| 17799_9   | 6PGL                          | 6-phosphogluconolactonase                                                                               | O95336 | PGLS     | chr19:17511636  | Inverse variance weighted | 3  | -0.130 | 0.100 | 1.959E-01 | 0.948 | cis | Hospitalized COVID-19 |
| 13405_61  | ISK2                          | Serine protease inhibitor Kazal-type 2                                                                  | P20155 | SPINK2   | chr4:56821742   | Inverse variance weighted | 5  | -0.033 | 0.026 | 1.960E-01 | 0.948 | cis | Hospitalized COVID-19 |
| 11178_21  | SVEP1:EGF-like domains 4-6    | Sushi, von Willebrand factor type A, EGF and pentraxin domain-containing protein 1:EGF-like domains 4-6 | Q4LDE5 | SVEP1    | chr9:110579880  | Inverse variance weighted | 4  | 0.089  | 0.069 | 1.970E-01 | 0.948 | cis | Hospitalized COVID-19 |
| 9482_110  | NUDT9                         | ADP-ribose pyrophosphatase, mitochondrial                                                               | Q9BW91 | NUDT9    | chr4:87422573   | Wald ratio                | 1  | -0.222 | 0.172 | 1.977E-01 | 0.948 | cis | Hospitalized COVID-19 |

|           |                                 |                                                                                             |        |          |                 |                           |    |        |       |           |       |     |                       |
|-----------|---------------------------------|---------------------------------------------------------------------------------------------|--------|----------|-----------------|---------------------------|----|--------|-------|-----------|-------|-----|-----------------------|
| 4568_17   | SLIK5                           | SLIT and NTRK-like protein 5                                                                | O94991 | SUTRK5   | chr13:87671371  | Inverse variance weighted | 4  | 0.081  | 0.063 | 1.980E-01 | 0.948 | cis | Hospitalized COVID-19 |
| 17726_3   | SAR1A                           | GTP-binding protein SAR1a                                                                   | Q9NR31 | SAR1A    | chr10:70170523  | Inverse variance weighted | 2  | 0.132  | 0.103 | 1.989E-01 | 0.948 | cis | Hospitalized COVID-19 |
| 19622_7   | Activin A                       | Activin A                                                                                   | P08476 | INHBA    | chr7:41705834   | Wald ratio                | 1  | 0.243  | 0.189 | 1.994E-01 | 0.948 | cis | Hospitalized COVID-19 |
| 19602_36  | jun-D                           | Transcription factor jun-D                                                                  | P17535 | JUND     | chr19:18281622  | Wald ratio                | 1  | -0.266 | 0.208 | 2.011E-01 | 0.948 | cis | Hospitalized COVID-19 |
| 11192_168 | TINAL                           | Tubulointerstitial nephritis antigen-like                                                   | Q9GZM7 | TINAGL1  | chr1:31576485   | Wald ratio                | 1  | -0.132 | 0.103 | 2.020E-01 | 0.948 | cis | Hospitalized COVID-19 |
| 10372_18  | STAT6                           | Signal transducer and activator of transcription 6                                          | P42226 | STAT6    | chr12:57132139  | Inverse variance weighted | 2  | 0.091  | 0.071 | 2.028E-01 | 0.948 | cis | Hospitalized COVID-19 |
| 7140_1    | ELA2A                           | Chymotrypsin-like elastase family member 2A                                                 | P08217 | CELA2A   | chr1:15456728   | Wald ratio                | 1  | 0.136  | 0.107 | 2.033E-01 | 0.948 | cis | Hospitalized COVID-19 |
| 9197_4    | LEG9                            | Galectin-9                                                                                  | O00182 | LGAL59   | chr17:27629798  | Wald ratio                | 1  | -0.118 | 0.093 | 2.035E-01 | 0.948 | cis | Hospitalized COVID-19 |
| 13686_2   | IL-5 Ra                         | Interleukin-5 receptor subunit alpha                                                        | Q01344 | IL5RA    | chr3:3126613    | Inverse variance weighted | 6  | 0.031  | 0.025 | 2.050E-01 | 0.948 | cis | Hospitalized COVID-19 |
| 8923_94   | GLT1L                           | Polypeptide N-acetylgalactosaminyltransferase 16                                            | Q8NA28 | GALNT16  | chr14:69259277  | Inverse variance weighted | 4  | -0.079 | 0.062 | 2.055E-01 | 0.948 | cis | Hospitalized COVID-19 |
| 3290_50   | CD109                           | CD109 antigen                                                                               | Q6YHK3 | CD109    | chr6:73695785   | Inverse variance weighted | 7  | 0.031  | 0.024 | 2.055E-01 | 0.948 | cis | Hospitalized COVID-19 |
| 10490_3   | RPN1:CD                         | Dolichyl-diphosphooligosaccharide--protein glycosyltransferase subunit 1:Cytoplasmic domain | P04843 | RPN1     | chr3:128681075  | Wald ratio                | 1  | -0.081 | 0.064 | 2.075E-01 | 0.948 | cis | Hospitalized COVID-19 |
| 3554_24   | Adiponectin                     | Adiponectin                                                                                 | Q15848 | ADIPOQ   | chr3:186842704  | Inverse variance weighted | 4  | -0.058 | 0.046 | 2.077E-01 | 0.948 | cis | Hospitalized COVID-19 |
| 5963_9    | Dermokine                       | Dermokine                                                                                   | Q6E0U4 | DMKN     | chr19:35513658  | Wald ratio                | 1  | -0.241 | 0.192 | 2.093E-01 | 0.948 | cis | Hospitalized COVID-19 |
| 14088_38  | IGFBP-6                         | Insulin-like growth factor-binding protein 6                                                | P24592 | IGFBP6   | chr12:53097436  | Wald ratio                | 1  | -0.180 | 0.143 | 2.097E-01 | 0.948 | cis | Hospitalized COVID-19 |
| 5132_71   | TCCR                            | Interleukin-27 receptor subunit alpha                                                       | Q6UWB1 | IL27RA   | chr19:14031762  | Inverse variance weighted | 7  | -0.027 | 0.022 | 2.103E-01 | 0.948 | cis | Hospitalized COVID-19 |
| 5638_23   | GT2S1                           | Procollagen galactosyltransferase 1                                                         | Q8NB15 | COLGALT1 | chr19:17555649  | Inverse variance weighted | 3  | 0.086  | 0.069 | 2.105E-01 | 0.948 | cis | Hospitalized COVID-19 |
| 15486_126 | ABP1                            | Amiloride-sensitive amine oxidase [copper-containing]                                       | P19801 | AOC1     | chr17:150824627 | Inverse variance weighted | 10 | -0.022 | 0.018 | 2.108E-01 | 0.948 | cis | Hospitalized COVID-19 |
| 15641_20  | TEFF1                           | Tomoregulin-1                                                                               | Q8IYR6 | TMEFF1   | chr9:100473149  | Wald ratio                | 1  | -0.224 | 0.179 | 2.113E-01 | 0.948 | cis | Hospitalized COVID-19 |
| 4464_10   | Sialoadhesin                    | Sialoadhesin                                                                                | Q9BZ22 | SIGLEC1  | chr20:3712600   | Wald ratio                | 1  | 0.274  | 0.219 | 2.116E-01 | 0.948 | cis | Hospitalized COVID-19 |
| 13397_88  | HBD-2                           | Beta-defensin 4A                                                                            | O15263 | DEFB4A   | chr8:7894677    | Inverse variance weighted | 3  | 0.099  | 0.079 | 2.122E-01 | 0.948 | cis | Hospitalized COVID-19 |
| 14156_33  | 14-3-3 protein beta/alpha       | 14-3-3 protein beta/alpha                                                                   | P31946 | YWHA8    | chr20:44885702  | Wald ratio                | 1  | 0.229  | 0.184 | 2.122E-01 | 0.948 | cis | Hospitalized COVID-19 |
| 2813_11   | ART                             | Agouti-related protein                                                                      | O00253 | AGRP     | chr16:67483547  | Inverse variance weighted | 2  | 0.068  | 0.054 | 2.130E-01 | 0.948 | cis | Hospitalized COVID-19 |
| 15385_116 | FABP2                           | Fatty acid-binding protein, intestinal                                                      | P12104 | FABP2    | chr4:119322138  | Inverse variance weighted | 5  | 0.034  | 0.028 | 2.140E-01 | 0.948 | cis | Hospitalized COVID-19 |
| 5676_54   | ASIP                            | Agouti-signaling protein                                                                    | P42127 | ASIP     | chr20:34194569  | Wald ratio                | 1  | 0.035  | 0.028 | 2.143E-01 | 0.948 | cis | Hospitalized COVID-19 |
| 18235_16  | PGP                             | Glycerol-3-phosphate phosphatase                                                            | A6NDG6 | PGP      | chr16:2214840   | Inverse variance weighted | 2  | 0.104  | 0.084 | 2.160E-01 | 0.948 | cis | Hospitalized COVID-19 |
| 3009_3    | TGF-b R III                     | Transforming growth factor beta receptor type 3                                             | Q03167 | TGFBFR3  | chr1:91906335   | Inverse variance weighted | 2  | -0.138 | 0.111 | 2.163E-01 | 0.948 | cis | Hospitalized COVID-19 |
| 2972_57   | BMP-7                           | Bone morphogenetic protein 7                                                                | P18075 | BMP7     | chr20:57266641  | Wald ratio                | 1  | 0.219  | 0.178 | 2.171E-01 | 0.948 | cis | Hospitalized COVID-19 |
| 9876_20   | aldolase C                      | Fructose-bisphosphate aldolase C                                                            | P09972 | ALDOC    | chr17:28576948  | Inverse variance weighted | 2  | -0.198 | 0.161 | 2.172E-01 | 0.948 | cis | Hospitalized COVID-19 |
| 15487_164 | carboxylesterase, liver         | Liver carboxylesterase 1                                                                    | P23141 | CES1     | chr16:55833337  | Wald ratio                | 1  | 0.269  | 0.218 | 2.175E-01 | 0.948 | cis | Hospitalized COVID-19 |
| 11424_4   | FAAA                            | Fumarylacetoacetase                                                                         | P16930 | FAH      | chr15:80152490  | Inverse variance weighted | 5  | -0.026 | 0.021 | 2.175E-01 | 0.948 | cis | Hospitalized COVID-19 |
| 18917_53  | Pancreatic alpha-amyrase        | Pancreatic alpha-amyrase                                                                    | P04746 | AMY2A    | chr1:103617427  | Inverse variance weighted | 4  | -0.127 | 0.103 | 2.191E-01 | 0.948 | cis | Hospitalized COVID-19 |
| 19117_3   | PP14A                           | Protein phosphatase 1 regulatory subunit 14A                                                | Q96A00 | PPP1R14A | chr19:38255532  | Wald ratio                | 1  | 0.224  | 0.182 | 2.195E-01 | 0.948 | cis | Hospitalized COVID-19 |
| 4126_22   | BPI                             | Bactericidal permeability-increasing protein                                                | P17213 | BPI      | chr20:38304150  | Inverse variance weighted | 9  | 0.019  | 0.015 | 2.200E-01 | 0.948 | cis | Hospitalized COVID-19 |
| 16792_4   | Siglec-5                        | Sialic acid-binding Ig-like lectin 5                                                        | O15389 | SIGLEC5  | chr19:51630401  | Inverse variance weighted | 5  | 0.037  | 0.030 | 2.204E-01 | 0.948 | cis | Hospitalized COVID-19 |
| 7096_30   | RMD1                            | Regulator of microtubule dynamics protein 1                                                 | Q960B5 | RMDN1    | chr8:86514357   | Inverse variance weighted | 4  | 0.043  | 0.035 | 2.206E-01 | 0.948 | cis | Hospitalized COVID-19 |
| 17148_7   | BLVRB                           | Flavin reductase (NADPH)                                                                    | P33043 | BLVRB    | chr19:40465764  | Inverse variance weighted | 3  | -0.056 | 0.046 | 2.211E-01 | 0.948 | cis | Hospitalized COVID-19 |
| 16596_25  | GLRX3                           | Glutaredoxin-3                                                                              | O76003 | GLRX3    | chr10:130136391 | Wald ratio                | 1  | -0.156 | 0.127 | 2.215E-01 | 0.948 | cis | Hospitalized COVID-19 |
| 2828_82   | HAI-1                           | Kunitz-type protease inhibitor 1                                                            | O43278 | SPINT1   | chr15:40844018  | Inverse variance weighted | 2  | -0.114 | 0.094 | 2.222E-01 | 0.948 | cis | Hospitalized COVID-19 |
| 9744_139  | DNJA4                           | DnaI homolog subfamily A member 4                                                           | Q8WW22 | DNJA4A   | chr15:78264086  | Wald ratio                | 1  | 0.211  | 0.173 | 2.233E-01 | 0.948 | cis | Hospitalized COVID-19 |
| 19446_1   | GMPPR2                          | GMP reductase 2                                                                             | Q9P2T1 | GMPPR2   | chr14:24232422  | Inverse variance weighted | 2  | 0.057  | 0.047 | 2.236E-01 | 0.948 | cis | Hospitalized COVID-19 |
| 10722_13  | KSYK:Protein Kinase             | Tyrosine-protein kinase SYK:Protein kinase domain                                           | P43405 | SYK      | chr9:90801787   | Wald ratio                | 1  | 0.254  | 0.209 | 2.238E-01 | 0.948 | cis | Hospitalized COVID-19 |
| 9848_22   | Cyclin H                        | Cyclin H                                                                                    | P51946 | CNHN-H   | chr5:87412930   | Wald ratio                | 1  | -0.148 | 0.122 | 2.239E-01 | 0.948 | cis | Hospitalized COVID-19 |
| 13124_20  | ISLR2                           | Immunoglobulin superfamily containing leucine-rich repeat protein 2                         | Q6UXK2 | ISLR2    | chr15:74100311  | Inverse variance weighted | 4  | -0.064 | 0.053 | 2.244E-01 | 0.948 | cis | Hospitalized COVID-19 |
| 4920_10   | Lysozyme                        | Lysozyme C                                                                                  | P61626 | LYZ      | chr12:69348381  | Inverse variance weighted | 6  | -0.046 | 0.038 | 2.245E-01 | 0.948 | cis | Hospitalized COVID-19 |
| 2742_68   | Siglec-7                        | Sialic acid-binding Ig-like lectin 7                                                        | Q9Y286 | SIGLEC7  | chr19:51142299  | Wald ratio                | 1  | 0.121  | 0.100 | 2.264E-01 | 0.948 | cis | Hospitalized COVID-19 |
| 7009_8    | CD72                            | B-cell differentiation antigen CD72                                                         | P21854 | CD72     | chr9:35646810   | Inverse variance weighted | 2  | 0.108  | 0.090 | 2.265E-01 | 0.948 | cis | Hospitalized COVID-19 |
| 9076_25   | PENK                            | Proenkephalin-A                                                                             | P01210 | PENK     | chr8:56446671   | Inverse variance weighted | 5  | 0.024  | 0.020 | 2.266E-01 | 0.948 | cis | Hospitalized COVID-19 |
| 6081_52   | PCOC2                           | Procollagen C-endopeptidase enhancer 2                                                      | Q9UKZ9 | PCOLCE2  | chr3:142889206  | Inverse variance weighted | 10 | -0.032 | 0.027 | 2.268E-01 | 0.948 | cis | Hospitalized COVID-19 |
| 12524_18  | SAT2                            | Diamine acetyltransferase 2                                                                 | Q96F10 | SAT2     | chr17:7627876   | Inverse variance weighted | 3  | -0.084 | 0.069 | 2.272E-01 | 0.948 | cis | Hospitalized COVID-19 |
| 7015_8    | LRB5                            | Leukocyte immunoglobulin-like receptor subfamily B member 5                                 | O75023 | LIRB5    | chr19:54257301  | Inverse variance weighted | 6  | 0.015  | 0.013 | 2.280E-01 | 0.948 | cis | Hospitalized COVID-19 |
| 13095_51  | PSP                             | Lithostathine-1-alpha                                                                       | P05451 | REG1A    | chr2:79120362   | Inverse variance weighted | 4  | 0.127  | 0.105 | 2.285E-01 | 0.948 | cis | Hospitalized COVID-19 |
| 7128_9    | VWA2                            | von Willebrand factor A domain-containing protein 2                                         | Q5GFL6 | VWA2     | chr10:114239254 | Inverse variance weighted | 6  | 0.049  | 0.041 | 2.289E-01 | 0.948 | cis | Hospitalized COVID-19 |
| 8080_24   | PSMP                            | Prostate-associated microseminoprotein                                                      | Q116U9 | MSMP     | chr9:35756613   | Wald ratio                | 1  | 0.187  | 0.155 | 2.292E-01 | 0.948 | cis | Hospitalized COVID-19 |
| 4162_54   | Transferrin                     | Serotransferrin                                                                             | P02787 | TF       | chr3:133746040  | Inverse variance weighted | 2  | 0.078  | 0.065 | 2.292E-01 | 0.948 | cis | Hospitalized COVID-19 |
| 8795_48   | TR:ECD                          | Transferrin receptor protein 1:Extracellular domain                                         | P02786 | TFRC     | chr3:196082153  | Wald ratio                | 1  | 0.163  | 0.136 | 2.305E-01 | 0.948 | cis | Hospitalized COVID-19 |
| 8345_27   | GPX7                            | Glutathione peroxidase 7                                                                    | Q965L4 | GPX7     | chr1:52602371   | Inverse variance weighted | 7  | 0.027  | 0.023 | 2.315E-01 | 0.948 | cis | Hospitalized COVID-19 |
| 8300_82   | PEX14:N-term                    | Peroxisomal membrane protein PEX14:N-term                                                   | O75381 | PEX14    | chr1:10472288   | Wald ratio                | 1  | 0.252  | 0.211 | 2.322E-01 | 0.948 | cis | Hospitalized COVID-19 |
| 4294_16   | Sphingosine kinase 1            | Sphingosine kinase 1                                                                        | Q9NYA1 | SPHK1    | chr17:76376584  | Inverse variance weighted | 2  | 0.116  | 0.097 | 2.325E-01 | 0.948 | cis | Hospitalized COVID-19 |
| 9826_135  | Fragile histidine triad protein | Bis(5'-adenosyl)-triphosphate                                                               | P49789 | FHIT     | chr3:61251459   | Inverse variance weighted | 2  | 0.148  | 0.124 | 2.332E-01 | 0.948 | cis | Hospitalized COVID-19 |
| 3326_58   | Nectin-like protein 2           | Cell adhesion molecule 1                                                                    | Q9BY67 | CADM1    | chr11:115504957 | Wald ratio                | 1  | 0.088  | 0.074 | 2.337E-01 | 0.948 | cis | Hospitalized COVID-19 |
| 17738_7   | CRNN                            | Cornulin                                                                                    | Q9UBG3 | CRNN     | chr1:152414263  | Wald ratio                | 1  | 0.091  | 0.077 | 2.351E-01 | 0.948 | cis | Hospitalized COVID-19 |
| 12366_16  | CRGD                            | Gamma-crystallin D                                                                          | P07320 | CRYGD    | chr2:208124524  | Wald ratio                | 1  | 0.113  | 0.096 | 2.366E-01 | 0.948 | cis | Hospitalized COVID-19 |
| 18380_78  | Albumin                         | Serum albumin                                                                               | P02768 | ALB      | chr4:73397114   | Wald ratio                | 1  | 0.228  | 0.193 | 2.370E-01 | 0.948 | cis | Hospitalized COVID-19 |
| 16302_11  | SPLC2                           | BPI fold-containing family A member 2                                                       | Q96DR5 | BF1FA2   | chr20:33161768  | Wald ratio                | 1  | -0.189 | 0.160 | 2.373E-01 | 0.948 | cis | Hospitalized COVID-19 |
| 9278_9    | SDF-1                           | Stromal cell-derived factor 1                                                               | P48061 | CXCL12   | chr10:44386493  | Inverse variance weighted | 2  | 0.136  | 0.115 | 2.386E-01 | 0.948 | cis | Hospitalized COVID-19 |
| 4159_130  | Factor H                        | Complement factor H                                                                         | P08603 | CFH      | chr1:196651754  | Wald ratio                | 1  | 0.166  | 0.141 | 2.388E-01 | 0.948 | cis | Hospitalized COVID-19 |
| 2962_50   | PTHrP                           | Parathyroid hormone-related protein                                                         | P12272 | PTHLP    | chr12:27972733  | Inverse variance weighted | 3  | 0.089  | 0.075 | 2.388E-01 | 0.948 | cis | Hospitalized COVID-19 |
| 13427_66  | MA1C1                           | Mannosyl-oligosaccharide 1,2-alpha-mannosidase IC                                           | Q9NR34 | MAN1C1   | chr1:25616791   | Inverse variance weighted | 3  | -0.060 | 0.051 | 2.388E-01 | 0.948 | cis | Hospitalized COVID-19 |
| 4874_3    | Angiogenin                      | Angiogenin                                                                                  | P03950 | ANG      | chr14:20684177  | Inverse variance weighted | 5  | 0.056  | 0.048 | 2.391E-01 | 0.948 | cis | Hospitalized COVID-19 |
| 11696_7   | RABP2                           | Cellular retinoic acid-binding protein 2                                                    | P29373 | CRABP2   | chr1:156705816  | Inverse variance weighted | 3  | -0.068 | 0.058 | 2.392E-01 | 0.948 | cis | Hospitalized COVID-19 |
| 8877_22   | F176C:ECD                       | Protein eva-1 homolog C:Extracellular domain                                                | P58658 | EVA1C    | chr21:32412006  | Wald ratio                | 1  | -0.192 | 0.163 | 2.392E-01 | 0.948 | cis | Hospitalized COVID-19 |
| 4924_32   | MMP-1                           | Interstitial collagenase                                                                    | P03956 | MMP1     | chr11:102798160 | Inverse variance weighted | 9  | 0.032  | 0.027 | 2.396E-01 | 0.948 | cis | Hospitalized COVID-19 |
| 9719_145  | MMP-16                          | Matrix metalloproteinase-16                                                                 | P51512 | MMP16    | chr8:88328025   | Wald ratio                | 1  | -0.219 | 0.186 | 2.406E-01 | 0.948 | cis | Hospitalized COVID-19 |
| 11547_84  | MUSK                            | Muscle, skeletal receptor tyrosine-protein kinase                                           | O15146 | MUSK     | chr9:110668779  | Wald ratio                | 1  | 0.214  | 0.182 | 2.407E-01 | 0.948 | cis | Hospitalized COVID-19 |
| 6927_7    | NDST1                           | Bifunctional heparan sulfate N-deacetylase/N-sulfotransferase 1                             | P52848 | NDST1    | chr5:150485818  | Wald ratio                | 1  | 0.085  | 0.073 | 2.413E-01 | 0.948 | cis | Hospitalized COVID-19 |
| 8269_327  | ARSK                            | Arylsulfatase K                                                                             | Q6UWY0 | ARSK     | chr5:95555101   | Wald ratio                | 1  | 0.153  | 0.130 | 2.420E-01 | 0.948 | cis | Hospitalized COVID-19 |
| 7185_29   | GPV                             | Platelet glycoprotein V                                                                     | P40197 | GP5      | chr3:194399266  | Inverse variance weighted | 2  | -0.121 | 0.104 | 2.424E-01 | 0.948 | cis | Hospitalized COVID-19 |

|           |                         |                                                                   |        |          |                 |                           |    |        |       |           |       |     |                       |
|-----------|-------------------------|-------------------------------------------------------------------|--------|----------|-----------------|---------------------------|----|--------|-------|-----------|-------|-----|-----------------------|
| 13460_4   | CHAD                    | Chondroadherin                                                    | O15335 | CHAD     | chr17:50468906  | Wald ratio                | 1  | -0.235 | 0.201 | 2.428E-01 | 0.948 | cis | Hospitalized COVID-19 |
| 14684_17  | CAN2                    | Calpain-2 catalytic subunit                                       | P17655 | CAPN2    | chr12:223701593 | Inverse variance weighted | 3  | -0.081 | 0.070 | 2.436E-01 | 0.948 | cis | Hospitalized COVID-19 |
| 3004_67   | PD-L2                   | Programmed cell death 1 ligand 2                                  | Q98051 | PDCD1LG2 | chr9:5510531    | Inverse variance weighted | 5  | -0.038 | 0.033 | 2.444E-01 | 0.948 | cis | Hospitalized COVID-19 |
| 7145_1    | ITIH3                   | Inter-alpha-trypsin inhibitor heavy chain H3                      | Q06033 | ITIH3    | chr3:52794768   | Inverse variance weighted | 10 | 0.034  | 0.029 | 2.444E-01 | 0.948 | cis | Hospitalized COVID-19 |
| 17153_46  | KI2L3                   | Killer cell immunoglobulin-like receptor 2D13                     | P43628 | KIR2DL3  | chr19:54738513  | Inverse variance weighted | 4  | -0.031 | 0.026 | 2.444E-01 | 0.948 | cis | Hospitalized COVID-19 |
| 13472_35  | HDHD2                   | Halooacid dehalogenase-like hydrolase domain-containing protein 2 | Q9H0R4 | HDHD2    | chr18:47150500  | Inverse variance weighted | 3  | 0.056  | 0.048 | 2.445E-01 | 0.948 | cis | Hospitalized COVID-19 |
| 4430_44   | Collectin kidney 1      | Collectin-11                                                      | Q9BWP8 | COLEC11  | chr2:3594832    | Inverse variance weighted | 10 | 0.022  | 0.019 | 2.462E-01 | 0.948 | cis | Hospitalized COVID-19 |
| 14208_3   | RET7                    | Retinoid-binding protein 7                                        | Q96R05 | RBP7     | chr1:9997206    | Inverse variance weighted | 2  | -0.103 | 0.089 | 2.467E-01 | 0.948 | cis | Hospitalized COVID-19 |
| 5749_53   | COL                     | Colipase                                                          | P04118 | CLP5     | chr6:35797344   | Inverse variance weighted | 10 | -0.031 | 0.027 | 2.487E-01 | 0.948 | cis | Hospitalized COVID-19 |
| 15387_44  | Neuropilin-2            | Neuropilin-2                                                      | O60462 | NRP2     | chr2:205681990  | Inverse variance weighted | 4  | 0.061  | 0.053 | 2.500E-01 | 0.948 | cis | Hospitalized COVID-19 |
| 13748_4   | MCP-2                   | C-C motif chemokine 8                                             | P80075 | CCL8     | chr17:34319435  | Inverse variance weighted | 7  | 0.038  | 0.033 | 2.503E-01 | 0.948 | cis | Hospitalized COVID-19 |
| 17327_3   | CNPY3                   | Protein canopy homolog 3                                          | Q98109 | CNPY3    | chr6:42929480   | Wald ratio                | 1  | -0.209 | 0.182 | 2.511E-01 | 0.948 | cis | Hospitalized COVID-19 |
| 9265_10   | GLIP1                   | Glioma pathogenesis-related protein 1                             | P48060 | GLIPR1   | chr12:75480753  | Wald ratio                | 1  | -0.131 | 0.114 | 2.514E-01 | 0.948 | cis | Hospitalized COVID-19 |
| 15494_11  | FGFP1                   | Fibroblast growth factor-binding protein 1                        | Q14512 | FGFBP1   | chr4:15938740   | Wald ratio                | 1  | -0.182 | 0.158 | 2.517E-01 | 0.948 | cis | Hospitalized COVID-19 |
| 7769_29   | 3BP2                    | SH3 domain-binding protein 2                                      | P78314 | SH3BP2   | chr4:2793071    | Inverse variance weighted | 3  | 0.076  | 0.067 | 2.527E-01 | 0.948 | cis | Hospitalized COVID-19 |
| 16770_3   | REG1B                   | Lithostathine-1-beta                                              | P48304 | REG1B    | chr2:79088019   | Inverse variance weighted | 3  | 0.243  | 0.215 | 2.569E-01 | 0.948 | cis | Hospitalized COVID-19 |
| 7163_26   | lacritin                | Extracellular glycoprotein lacritin                               | Q9GZ28 | LACRT    | chr12:54634895  | Wald ratio                | 1  | -0.247 | 0.219 | 2.577E-01 | 0.948 | cis | Hospitalized COVID-19 |
| 15589_1   | Gc-Globulin, Mixed Type | Vitamin D-binding protein                                         | P02774 | GC       | chr4:71804041   | Inverse variance weighted | 2  | 0.087  | 0.077 | 2.577E-01 | 0.948 | cis | Hospitalized COVID-19 |
| 11117_2   | SPT20                   | Spermatogenesis-associated protein 20                             | Q8TB22 | SPATA20  | chr17:50543058  | Inverse variance weighted | 4  | -0.044 | 0.039 | 2.585E-01 | 0.948 | cis | Hospitalized COVID-19 |
| 7808_5    | GLCE                    | D-glucuronyl C5-epimerase                                         | Q94923 | GLCE     | chr15:69160584  | Inverse variance weighted | 7  | -0.028 | 0.025 | 2.586E-01 | 0.948 | cis | Hospitalized COVID-19 |
| 8403_18   | Fatty acid synthase     | Fatty acid synthase                                               | P49327 | FASN     | chr17:82098294  | Wald ratio                | 1  | 0.082  | 0.073 | 2.592E-01 | 0.948 | cis | Hospitalized COVID-19 |
| 11152_46  | kallikrein 13           | Kallikrein-13                                                     | Q9UKR3 | KLK13    | chr19:51065114  | Wald ratio                | 1  | -0.144 | 0.128 | 2.604E-01 | 0.948 | cis | Hospitalized COVID-19 |
| 2849_49   | AIF1                    | Allograft inflammatory factor 1                                   | P55008 | AIF1     | chr6:31615217   | Inverse variance weighted | 2  | 0.195  | 0.174 | 2.611E-01 | 0.948 | cis | Hospitalized COVID-19 |
| 6558_5    | COL10                   | Collectin-10                                                      | Q9Y6Z7 | COLEC10  | chr8:118995452  | Wald ratio                | 1  | 0.208  | 0.185 | 2.611E-01 | 0.948 | cis | Hospitalized COVID-19 |
| 8606_39   | GNMNB:CD                | Transmembrane glycoprotein NMB:Cytoplasmic domain                 | Q14956 | GNPMB    | chr7:23235967   | Inverse variance weighted | 7  | 0.037  | 0.033 | 2.611E-01 | 0.948 | cis | Hospitalized COVID-19 |
| 2992_59   | IL-17 sR                | Interleukin-17 receptor A                                         | Q9F466 | IL17RA   | chr22:17084954  | Inverse variance weighted | 7  | -0.014 | 0.012 | 2.618E-01 | 0.948 | cis | Hospitalized COVID-19 |
| 15336_7   | SELM                    | Selenoprotein M                                                   | Q8WWX9 | SELENUM  | chr22:31120069  | Wald ratio                | 1  | 0.220  | 0.197 | 2.625E-01 | 0.948 | cis | Hospitalized COVID-19 |
| 7251_64   | CIQT3                   | Complement C1q tumor necrosis factor-related protein 3            | Q9BX14 | C1QTNF3  | chr5:34043213   | Inverse variance weighted | 2  | -0.083 | 0.074 | 2.632E-01 | 0.948 | cis | Hospitalized COVID-19 |
| 8233_2    | ITIH5                   | Inter-alpha-trypsin inhibitor heavy chain H5                      | Q86UX2 | ITIH5    | chr10:7666998   | Inverse variance weighted | 7  | -0.043 | 0.038 | 2.635E-01 | 0.948 | cis | Hospitalized COVID-19 |
| 9288_7    | FKBP7                   | Peptidyl-prolyl cis-trans isomerase FKBP7                         | Q9Y860 | FKBP7    | chr2:178478600  | Inverse variance weighted | 4  | 0.038  | 0.034 | 2.638E-01 | 0.948 | cis | Hospitalized COVID-19 |
| 6367_66   | fibromodulin            | fibromodulin                                                      | Q06828 | FMOD     | chr1:203351758  | Inverse variance weighted | 2  | 0.064  | 0.058 | 2.640E-01 | 0.948 | cis | Hospitalized COVID-19 |
| 16785_45  | HD-5                    | Defensin-5                                                        | Q01523 | DEFA5    | chr8:7056739    | Wald ratio                | 1  | -0.178 | 0.159 | 2.640E-01 | 0.948 | cis | Hospitalized COVID-19 |
| 12378_71  | TPSN                    | Tapasin                                                           | O15533 | TPASP    | chr6:33314284   | Inverse variance weighted | 4  | 0.020  | 0.018 | 2.642E-01 | 0.948 | cis | Hospitalized COVID-19 |
| 7866_11   | DJC30                   | Dnal homolog subfamily C member 30                                | Q96L19 | DNAJC30  | chr7:73683453   | Inverse variance weighted | 2  | -0.092 | 0.082 | 2.645E-01 | 0.948 | cis | Hospitalized COVID-19 |
| 17761_2   | NUDT5                   | ADP-sugar pyrophosphatase                                         | Q9UK99 | NUDT5    | chr10:12196144  | Wald ratio                | 1  | -0.149 | 0.134 | 2.647E-01 | 0.948 | cis | Hospitalized COVID-19 |
| 9256_78   | NPTX1                   | Neuronal pentraxin-1                                              | Q15818 | NPTX1    | chr17:80477843  | Inverse variance weighted | 5  | -0.048 | 0.043 | 2.653E-01 | 0.948 | cis | Hospitalized COVID-19 |
| 19262_219 | ACADV                   | Very long-chain specific acyl-CoA dehydrogenase, mitochondrial    | P49748 | ACADVL   | chr17:7217125   | Wald ratio                | 1  | -0.224 | 0.201 | 2.664E-01 | 0.948 | cis | Hospitalized COVID-19 |
| 2743_5    | Sonic Hedgehog          | Sonic hedgehog protein                                            | Q15465 | SHH      | chr7:155812463  | Inverse variance weighted | 2  | -0.134 | 0.120 | 2.667E-01 | 0.948 | cis | Hospitalized COVID-19 |
| 11302_237 | TENR                    | Tenascin-R                                                        | Q92752 | TNR      | chr1:175743616  | Wald ratio                | 1  | 0.089  | 0.080 | 2.672E-01 | 0.948 | cis | Hospitalized COVID-19 |
| 16070_7   | WIF-1                   | Wnt inhibitory factor 1                                           | Q9Y5W5 | WIF1     | chr12:65121305  | Wald ratio                | 1  | -0.191 | 0.172 | 2.678E-01 | 0.948 | cis | Hospitalized COVID-19 |
| 9557_5    | MAN51                   | MAN5C domain-containing protein 1                                 | Q9H8J5 | MAN5C1   | chr12:12350242  | Inverse variance weighted | 3  | 0.068  | 0.061 | 2.681E-01 | 0.948 | cis | Hospitalized COVID-19 |
| 7059_14   | LIRAE6                  | Leukocyte immunoglobulin-like receptor subfamily A member 6       | Q6PI73 | LIRAE6   | chr19:54242791  | Inverse variance weighted | 8  | 0.056  | 0.050 | 2.685E-01 | 0.948 | cis | Hospitalized COVID-19 |
| 12686_15  | THMT                    | 3-mercaptopyruvate sulfurtransferase                              | P25325 | MPST     | chr22:37019635  | Inverse variance weighted | 2  | -0.120 | 0.109 | 2.696E-01 | 0.948 | cis | Hospitalized COVID-19 |
| 19606_28  | ihh                     | Indian hedgehog protein                                           | Q14623 | IHH      | chr2:219060921  | Inverse variance weighted | 3  | -0.175 | 0.159 | 2.702E-01 | 0.948 | cis | Hospitalized COVID-19 |
| 9077_10   | MA1A2                   | Mannosyl-oligosaccharide 1,2-alpha-mannosidase IB                 | O60476 | MAN1A2   | chr1:117367449  | Inverse variance weighted | 4  | -0.055 | 0.050 | 2.703E-01 | 0.948 | cis | Hospitalized COVID-19 |
| 7950_142  | BTNL9                   | Butyrophilin-like protein 9                                       | Q6UXG8 | BTNL9    | chr5:181040225  | Wald ratio                | 1  | 0.167  | 0.151 | 2.704E-01 | 0.948 | cis | Hospitalized COVID-19 |
| 13700_10  | annexin II              | Annexin A2                                                        | P07355 | ANXA2    | chr15:60402883  | Inverse variance weighted | 6  | -0.083 | 0.076 | 2.729E-01 | 0.948 | cis | Hospitalized COVID-19 |
| 9266_1    | sTREM-1                 | Triggering receptor expressed on myeloid cells 1                  | Q9NPP9 | TREM1    | chr6:41286682   | Inverse variance weighted | 6  | 0.074  | 0.067 | 2.729E-01 | 0.948 | cis | Hospitalized COVID-19 |
| 8397_147  | QSOX2                   | Sulphydryl oxidase 2                                              | Q6ZRP7 | QSOX2    | chr9:136245812  | Inverse variance weighted | 7  | 0.026  | 0.024 | 2.731E-01 | 0.948 | cis | Hospitalized COVID-19 |
| 4991_12   | GPC5                    | Glypican-5                                                        | P78333 | GPC5     | chr13:91398621  | Inverse variance weighted | 6  | -0.028 | 0.026 | 2.743E-01 | 0.948 | cis | Hospitalized COVID-19 |
| 9747_48   | MARK3                   | MAP/microtubule affinity-regulating kinase 3                      | P27448 | MARK3    | chr14:103385377 | Wald ratio                | 1  | 0.292  | 0.268 | 2.752E-01 | 0.948 | cis | Hospitalized COVID-19 |
| 5542_22   | NRP1                    | Neuropilin-1                                                      | O14786 | NRP1     | chr10:33336262  | Inverse variance weighted | 5  | -0.033 | 0.030 | 2.767E-01 | 0.948 | cis | Hospitalized COVID-19 |
| 14623_26  | SUMO3                   | Small ubiquitin-related modifier 3                                | P55854 | SUMO3    | chr21:44818779  | Wald ratio                | 1  | -0.214 | 0.197 | 2.771E-01 | 0.948 | cis | Hospitalized COVID-19 |
| 2973_15   | CD36 ANTIGEN            | Platelet glycoprotein 4                                           | P16671 | CD36     | chr7:80369575   | Inverse variance weighted | 4  | 0.055  | 0.051 | 2.790E-01 | 0.948 | cis | Hospitalized COVID-19 |
| 10938_13  | sLFA-3                  | Lymphocyte function-associated antigen 3                          | P19256 | CD58     | chr1:116571039  | Inverse variance weighted | 2  | -0.071 | 0.066 | 2.803E-01 | 0.948 | cis | Hospitalized COVID-19 |
| 13947_371 | NUD12                   | Peroxisomal NADH pyrophosphatase NUDT12                           | Q98QG2 | NUDT12   | chr5:103562790  | Inverse variance weighted | 4  | 0.033  | 0.031 | 2.810E-01 | 0.948 | cis | Hospitalized COVID-19 |
| 15333_11  | SDF2                    | Stromal cell-derived factor 2                                     | Q99470 | SDF2     | chr17:28662189  | Wald ratio                | 1  | 0.141  | 0.131 | 2.812E-01 | 0.948 | cis | Hospitalized COVID-19 |
| 5128_53   | SLAF6                   | SLAM family member 6                                              | Q96DU3 | SLAMF6   | chr1:160523262  | Wald ratio                | 1  | -0.062 | 0.057 | 2.814E-01 | 0.948 | cis | Hospitalized COVID-19 |
| 13552_7   | SWP70                   | Switch-associated protein 70                                      | Q9UH65 | SWAP70   | chr11:9664077   | Inverse variance weighted | 5  | -0.025 | 0.023 | 2.816E-01 | 0.948 | cis | Hospitalized COVID-19 |
| 12424_107 | THYN1                   | Thymocyte nuclear protein 1                                       | Q9PO16 | THYN1    | chr11:134253370 | Wald ratio                | 1  | 0.222  | 0.207 | 2.819E-01 | 0.948 | cis | Hospitalized COVID-19 |
| 8992_1    | TMEM2                   | Transmembrane protein 2                                           | Q9UHN6 | CEMP2    | chr9:71816690   | Inverse variance weighted | 2  | 0.094  | 0.087 | 2.821E-01 | 0.948 | cis | Hospitalized COVID-19 |
| 17333_20  | ACADM                   | Medium-chain specific acyl-CoA dehydrogenase, mitochondrial       | P11310 | ACADM    | chr1:75724431   | Wald ratio                | 1  | -0.055 | 0.051 | 2.822E-01 | 0.948 | cis | Hospitalized COVID-19 |
| 6444_15   | PSG3                    | Pregnancy-specific beta-1-glycoprotein 3                          | Q16557 | PSG3     | chr19:42740481  | Inverse variance weighted | 8  | 0.053  | 0.049 | 2.825E-01 | 0.948 | cis | Hospitalized COVID-19 |
| 17515_6   | STCH                    | Heat shock 70 kDa protein 13                                      | P48723 | HSPA13   | chr21:14383484  | Wald ratio                | 1  | 0.111  | 0.104 | 2.848E-01 | 0.948 | cis | Hospitalized COVID-19 |
| 17836_17  | S100A16                 | Protein S100-A16                                                  | Q96FQ6 | S100A16  | chr1:153613145  | Wald ratio                | 1  | -0.157 | 0.147 | 2.857E-01 | 0.948 | cis | Hospitalized COVID-19 |
| 10080_9   | EI2BA                   | Translation initiation factor eIF-2B subunit alpha                | Q14232 | EIF2B1   | chr12:123633766 | Wald ratio                | 1  | 0.193  | 0.181 | 2.864E-01 | 0.948 | cis | Hospitalized COVID-19 |
| 3059_50   | BAFF                    | Tumor necrosis factor ligand superfamily member 13B               | Q9Y275 | TNFSF13B | chr13:108251240 | Inverse variance weighted | 3  | -0.164 | 0.154 | 2.864E-01 | 0.948 | cis | Hospitalized COVID-19 |
| 11278_4   | COL11A2                 | Collagen alpha-2(XI) chain                                        | P13942 | COL11A2  | chr6:33192499   | Inverse variance weighted | 4  | 0.041  | 0.038 | 2.866E-01 | 0.948 | cis | Hospitalized COVID-19 |
| 16803_4   | CALB2                   | Calretinin                                                        | P22676 | CALB2    | chr16:71358713  | Inverse variance weighted | 2  | -0.170 | 0.159 | 2.867E-01 | 0.948 | cis | Hospitalized COVID-19 |
| 7655_11   | N-terminal pro-BNP      | N-terminal pro-BNP                                                | P16860 | NPPB     | chr1:11858945   | Inverse variance weighted | 3  | 0.056  | 0.052 | 2.874E-01 | 0.948 | cis | Hospitalized COVID-19 |
| 15483_377 | Agrin                   | Agrin                                                             | O00468 | AGRN     | chr1:1020120    | Inverse variance weighted | 6  | -0.072 | 0.068 | 2.875E-01 | 0.948 | cis | Hospitalized COVID-19 |
| 12347_29  | CCM2                    | Cerebral cavernous malformations 2 protein                        | Q9BSQ5 | CCM2     | chr7:44999475   | Wald ratio                | 1  | -0.177 | 0.166 | 2.875E-01 | 0.948 | cis | Hospitalized COVID-19 |
| 19488_1   | PDCD6                   | Programmed cell death protein 6                                   | O75340 | PDCD6    | chr5:271621     | Inverse variance weighted | 3  | 0.074  | 0.069 | 2.875E-01 | 0.948 | cis | Hospitalized COVID-19 |
| 3364_76   | Cathepsin V             | Cathepsin L2                                                      | O60911 | CTSV     | chr9:97156556   | Inverse variance weighted | 4  | -0.056 | 0.053 | 2.883E-01 | 0.948 | cis | Hospitalized COVID-19 |
| 14094_29  | HB-EGF                  | Heparin-binding EGF-like growth factor                            | Q99075 | HBEFG    | chr5:140346603  | Wald ratio                | 1  | 0.226  | 0.213 | 2.894E-01 | 0.948 | cis | Hospitalized COVID-19 |
| 6373_54   | DLK1                    | Protein delta homolog 1                                           | P80370 | DLK1     | chr14:100725705 | Inverse variance weighted | 2  | -0.147 | 0.139 | 2.903E-01 | 0.948 | cis | Hospitalized COVID-19 |
| 15653_9   | COAA1                   | Collagen alpha-1(X) chain                                         | Q03692 | COL10A1  | chr6:116158747  | Inverse variance weighted | 3  | -0.076 | 0.072 | 2.907E-01 | 0.948 | cis | Hospitalized COVID-19 |
| 13113_7   | Osteopontin             | Osteopontin                                                       | P10451 | SPP1     | chr4:87975667   | Inverse variance weighted | 2  | 0.063  | 0.060 | 2.914E-01 | 0.948 | cis | Hospitalized COVID-19 |



|           |                                  |                                                                                |        |          |                 |                           |    |        |       |           |       |     |                       |
|-----------|----------------------------------|--------------------------------------------------------------------------------|--------|----------|-----------------|---------------------------|----|--------|-------|-----------|-------|-----|-----------------------|
| 16323_8   | NRX3A                            | Neurexin-3                                                                     | Q9Y4C0 | NRXN3    | chr14:78170373  | Wald ratio                | 1  | 0.201  | 0.211 | 3.425E-01 | 0.948 | cis | Hospitalized COVID-19 |
| 6455_52   | HPLN4                            | Hyaluronan and proteoglycan link protein 4                                     | Q86UW8 | HAPLN4   | chr19:19262804  | Wald ratio                | 1  | 0.136  | 0.144 | 3.427E-01 | 0.948 | cis | Hospitalized COVID-19 |
| 3367_8    | FETUB                            | Fetuin-B                                                                       | Q9UGM5 | FETUB    | chr3:186635969  | Inverse variance weighted | 5  | 0.053  | 0.056 | 3.429E-01 | 0.948 | cis | Hospitalized COVID-19 |
| 13969_24  | IMA7                             | Importin subunit alpha-7                                                       | O60684 | KPNAB    | chr1:32108056   | Wald ratio                | 1  | 0.166  | 0.175 | 3.434E-01 | 0.948 | cis | Hospitalized COVID-19 |
| 13973_62  | TTL                              | Tubulin-tyrosine ligase                                                        | Q8N688 | TTL      | chr2:112482156  | Wald ratio                | 1  | 0.173  | 0.183 | 3.441E-01 | 0.948 | cis | Hospitalized COVID-19 |
| 12408_333 | RB22A                            | Ras-related protein Rab-22A                                                    | Q9UL26 | RA822A   | chr20:58309715  | Wald ratio                | 1  | 0.175  | 0.185 | 3.444E-01 | 0.948 | cis | Hospitalized COVID-19 |
| 5131_15   | TAJ                              | Tumor necrosis factor receptor superfamily member 19                           | Q9NS68 | TNFRSF19 | chr13:23570370  | Wald ratio                | 1  | -0.101 | 0.066 | 3.446E-01 | 0.948 | cis | Hospitalized COVID-19 |
| 19194_9   | Histidyl-tRNA synthetase-related | D-tyrosyl-tRNA(Tyr) decylase 1                                                 | Q8TEA8 | DTD1     | chr20:18587942  | Wald ratio                | 1  | 0.049  | 0.052 | 3.455E-01 | 0.948 | cis | Hospitalized COVID-19 |
| 17692_2   | BT3A3                            | Butyrophilin subfamily 3 member A3                                             | O00478 | BTN3A3   | chr6:26440472   | Inverse variance weighted | 9  | -0.020 | 0.022 | 3.458E-01 | 0.948 | cis | Hospitalized COVID-19 |
| 14688_6   | PTN7                             | Tyrosine-protein phosphatase non-receptor type 7                               | P35236 | PTPN7    | chr1:202161588  | Wald ratio                | 1  | -0.218 | 0.232 | 3.467E-01 | 0.948 | cis | Hospitalized COVID-19 |
| 13986_6   | LANC1                            | LanC-like protein 1                                                            | O43813 | LANCL1   | chr2:210477652  | Inverse variance weighted | 2  | -0.105 | 0.112 | 3.468E-01 | 0.948 | cis | Hospitalized COVID-19 |
| 4989_7    | Fibrinogen g-chain dimer         | Fibrinogen gamma chain                                                         | P02679 | FGG      | chr4:154612967  | Wald ratio                | 1  | -0.066 | 0.070 | 3.468E-01 | 0.948 | cis | Hospitalized COVID-19 |
| 14107_1   | MTHF5                            | 5-formyltetrahydrofolate cyclo-ligase                                          | P49914 | MTHF5    | chr15:79897379  | Inverse variance weighted | 6  | 0.028  | 0.030 | 3.473E-01 | 0.948 | cis | Hospitalized COVID-19 |
| 17786_5   | GGPP5                            | Geranylgeranyl pyrophosphate synthase                                          | O95749 | GGPS1    | chr1:235327350  | Wald ratio                | 1  | -0.107 | 0.114 | 3.479E-01 | 0.948 | cis | Hospitalized COVID-19 |
| 10892_8   | OSMR                             | Oncostatin-M-specific receptor subunit beta                                    | Q99650 | OSMR     | chr5:38845858   | Inverse variance weighted | 2  | 0.127  | 0.135 | 3.483E-01 | 0.948 | cis | Hospitalized COVID-19 |
| 17396_23  | ADH1A                            | Alcohol dehydrogenase 1A                                                       | P07327 | ADH1A    | chr4:99291003   | Wald ratio                | 1  | -0.092 | 0.098 | 3.485E-01 | 0.948 | cis | Hospitalized COVID-19 |
| 15470_11  | Hexosaminidase B                 | Beta-hexosaminidase subunit beta                                               | P07686 | HEXB     | chr5:74640023   | Inverse variance weighted | 4  | 0.049  | 0.053 | 3.492E-01 | 0.948 | cis | Hospitalized COVID-19 |
| 3066_12   | Galectin-3                       | Galectin-3                                                                     | P17931 | LGALS3   | chr14:55124110  | Inverse variance weighted | 4  | -0.029 | 0.031 | 3.492E-01 | 0.948 | cis | Hospitalized COVID-19 |
| 4906_35   | Coagulation Factor V             | Coagulation Factor V                                                           | P12259 | F5       | chr1:169586588  | Inverse variance weighted | 5  | 0.031  | 0.034 | 3.496E-01 | 0.948 | cis | Hospitalized COVID-19 |
| 17156_72  | DCAK1                            | Serine/threonine-protein kinase DCLK1                                          | O15075 | DCLK1    | chr13:36131382  | Inverse variance weighted | 3  | 0.046  | 0.049 | 3.499E-01 | 0.948 | cis | Hospitalized COVID-19 |
| 19251_56  | Platelet proteoglycan            | Serglycin                                                                      | P10124 | SRGN     | chr10:69088103  | Inverse variance weighted | 5  | -0.037 | 0.040 | 3.507E-01 | 0.948 | cis | Hospitalized COVID-19 |
| 8894_80   | hnRNP A/B                        | Heterogeneous nuclear ribonucleoprotein A/B                                    | Q99729 | HNRNPAB  | chr5:178204533  | Wald ratio                | 1  | -0.136 | 0.145 | 3.507E-01 | 0.948 | cis | Hospitalized COVID-19 |
| 18895_54  | GSTM4                            | Glutathione S-transferase Mu 4                                                 | Q03013 | GSTM4    | chr1:109656099  | Inverse variance weighted | 7  | 0.059  | 0.064 | 3.513E-01 | 0.948 | cis | Hospitalized COVID-19 |
| 5349_69   | DLL1                             | Delta-like protein 1                                                           | O00548 | DLL1     | chr2:170306565  | Inverse variance weighted | 2  | 0.081  | 0.087 | 3.519E-01 | 0.948 | cis | Hospitalized COVID-19 |
| 9715_15   | IGSF3                            | Immunoglobulin superfamily member 3                                            | O75054 | IGSF3    | chr1:116667755  | Inverse variance weighted | 3  | 0.090  | 0.097 | 3.519E-01 | 0.948 | cis | Hospitalized COVID-19 |
| 4154_57   | P-Selectin                       | P-selectin                                                                     | P16109 | SELP     | chr1:169630193  | Inverse variance weighted | 3  | -0.065 | 0.070 | 3.529E-01 | 0.948 | cis | Hospitalized COVID-19 |
| 11102_22  | REG4                             | Regenerating islet-derived protein 4                                           | Q9BYZ8 | REG4     | chr1:119811580  | Inverse variance weighted | 5  | -0.058 | 0.063 | 3.530E-01 | 0.948 | cis | Hospitalized COVID-19 |
| 17808_37  | NIT2                             | Omega-amidase NIT2                                                             | Q9NQR4 | NIT2     | chr3:10034739   | Inverse variance weighted | 2  | 0.125  | 0.135 | 3.533E-01 | 0.948 | cis | Hospitalized COVID-19 |
| 15539_15  | SLIK1                            | SLIT and NTRK-like protein 1                                                   | Q96PX8 | SLITRK1  | chr13:83882474  | Wald ratio                | 1  | -0.142 | 0.153 | 3.536E-01 | 0.948 | cis | Hospitalized COVID-19 |
| 15491_20  | CD248                            | Endosialin                                                                     | Q9HCU0 | CD248    | chr11:66317044  | Inverse variance weighted | 2  | 0.391  | 0.423 | 3.550E-01 | 0.948 | cis | Hospitalized COVID-19 |
| 7968_15   | CRTAM                            | Cytotoxic and regulatory T-cell molecule                                       | O95727 | CRTAM    | chr11:122838500 | Inverse variance weighted | 6  | 0.035  | 0.038 | 3.556E-01 | 0.948 | cis | Hospitalized COVID-19 |
| 10511_10  | Collagen alpha-3(VI):isoform 3   | Collagen alpha-3(VI) chain:isoform 3                                           | P12111 | COL6A3   | chr2:237414328  | Inverse variance weighted | 2  | 0.085  | 0.092 | 3.558E-01 | 0.948 | cis | Hospitalized COVID-19 |
| 2961_1    | Protein C                        | Vitamin K-dependent protein C                                                  | P04070 | PROAC    | chr2:127418427  | Inverse variance weighted | 3  | 0.067  | 0.073 | 3.559E-01 | 0.948 | cis | Hospitalized COVID-19 |
| 2609_59   | Cystatin C                       | Cystatin-C                                                                     | P01034 | CST3     | chr20:23638473  | Inverse variance weighted | 2  | 0.094  | 0.102 | 3.572E-01 | 0.948 | cis | Hospitalized COVID-19 |
| 6965_19   | CNTP2                            | Contactin-associated protein-like 2                                            | Q9UHC6 | CNTNAP2  | chr7:146116002  | Inverse variance weighted | 5  | 0.024  | 0.027 | 3.582E-01 | 0.948 | cis | Hospitalized COVID-19 |
| 9796_4    | CEL                              | Bile salt-activated lipase                                                     | P19835 | CEL      | chr9:133061981  | Inverse variance weighted | 5  | -0.052 | 0.057 | 3.588E-01 | 0.948 | cis | Hospitalized COVID-19 |
| 9175_48   | DSCAM                            | Down syndrome cell adhesion molecule                                           | O60469 | DSCAM    | chr21:40847158  | Inverse variance weighted | 2  | -0.066 | 0.072 | 3.592E-01 | 0.948 | cis | Hospitalized COVID-19 |
| 4220_39   | FER                              | Tyrosine-protein kinase Fer                                                    | P16591 | FER      | chr5:108747841  | Wald ratio                | 1  | 0.130  | 0.142 | 3.597E-01 | 0.948 | cis | Hospitalized COVID-19 |
| 9241_40   | SIRPG                            | Signal-regulatory protein gamma                                                | Q9P1W8 | SIRPG    | chr20:1657779   | Wald ratio                | 1  | -0.122 | 0.133 | 3.603E-01 | 0.948 | cis | Hospitalized COVID-19 |
| 11378_37  | KSYP:SH2, 1 and 2                | Tyrosine-protein kinase SYK:Src Homology domain                                | P43405 | SYK      | chr9:90801787   | Wald ratio                | 1  | 0.202  | 0.221 | 3.604E-01 | 0.948 | cis | Hospitalized COVID-19 |
| 9459_7    | Fas, soluble                     | Tumor necrosis factor receptor superfamily member 6                            | P25445 | FAS      | chr10:88953813  | Inverse variance weighted | 2  | -0.160 | 0.175 | 3.604E-01 | 0.948 | cis | Hospitalized COVID-19 |
| 11134_30  | RF1ML                            | Peptide chain release factor 1-like, mitochondrial                             | Q9UGC7 | MTRF1L   | chr6:153002709  | Wald ratio                | 1  | 0.059  | 0.064 | 3.607E-01 | 0.948 | cis | Hospitalized COVID-19 |
| 7266_4    | SPA9                             | Serpin A9                                                                      | Q86WD7 | SERPINA9 | chr14:94479689  | Inverse variance weighted | 2  | 0.104  | 0.114 | 3.621E-01 | 0.948 | cis | Hospitalized COVID-19 |
| 13093_6   | SECTM1                           | Secreted and transmembrane protein 1                                           | Q8WVW6 | SECTM1   | chr17:82334074  | Inverse variance weighted | 3  | -0.068 | 0.075 | 3.626E-01 | 0.948 | cis | Hospitalized COVID-19 |
| 4534_10   | BSSP4                            | Brain-specific serine protease 4                                               | Q9G2N4 | PRSS22   | chr16:2858170   | Inverse variance weighted | 4  | -0.045 | 0.050 | 3.632E-01 | 0.948 | cis | Hospitalized COVID-19 |
| 5742_14   | PPA6                             | Lysophosphatidic acid phosphatase type 6                                       | Q9NPH0 | ACP6     | chr1:147670524  | Inverse variance weighted | 14 | -0.015 | 0.016 | 3.642E-01 | 0.948 | cis | Hospitalized COVID-19 |
| 17766_5   | NCF-1                            | Neutrophil cytosol factor 1                                                    | P14598 | NCF1     | chr7:74774011   | Inverse variance weighted | 6  | 0.043  | 0.048 | 3.667E-01 | 0.948 | cis | Hospitalized COVID-19 |
| 14067_6   | PKP2                             | Plakophilin-2                                                                  | Q99595 | PKP2     | chr12:32896777  | Inverse variance weighted | 2  | 0.182  | 0.202 | 3.672E-01 | 0.948 | cis | Hospitalized COVID-19 |
| 6433_57   | FA20A                            | Pseudokinase FAM20A                                                            | Q96MK3 | FAM20A   | chr17:68601367  | Inverse variance weighted | 3  | -0.076 | 0.085 | 3.677E-01 | 0.948 | cis | Hospitalized COVID-19 |
| 9172_69   | MMP-8                            | Neutrophil collagenase                                                         | P22894 | MMP8     | chr11:102727050 | Wald ratio                | 1  | 0.104  | 0.115 | 3.679E-01 | 0.948 | cis | Hospitalized COVID-19 |
| 5598_3    | GREM2                            | Gremlin-2                                                                      | Q9H772 | GREM2    | chr1:240612155  | Wald ratio                | 1  | -0.155 | 0.172 | 3.684E-01 | 0.948 | cis | Hospitalized COVID-19 |
| 8368_102  | TNF sR-II                        | Tumor necrosis factor receptor superfamily member 1B                           | P20333 | TNFRSF1B | chr1:12166991   | Wald ratio                | 1  | -0.057 | 0.063 | 3.702E-01 | 0.948 | cis | Hospitalized COVID-19 |
| 2879_9    | a1-Antichymotrypsin              | Alpha-1-antichymotrypsin                                                       | P01011 | SERPINA3 | chr14:94612384  | Wald ratio                | 1  | -0.205 | 0.228 | 3.707E-01 | 0.948 | cis | Hospitalized COVID-19 |
| 5227_60   | PKD1                             | [Pyruvate dehydrogenase (acetyl-transferring)] kinase isozyme 1, mitochondrial | Q15118 | PKD1     | chr2:172555373  | Inverse variance weighted | 3  | 0.057  | 0.063 | 3.711E-01 | 0.948 | cis | Hospitalized COVID-19 |
| 15529_33  | Cysteine-rich protein 1          | Cysteine and glycine-rich protein 1                                            | P21291 | CSR1     | chr1:201509456  | Wald ratio                | 1  | 0.101  | 0.114 | 3.723E-01 | 0.948 | cis | Hospitalized COVID-19 |
| 16318_12  | ALK-1                            | Serine/threonine-protein kinase receptor R3                                    | P37023 | ACVRL1   | chr12:51906908  | Inverse variance weighted | 3  | 0.046  | 0.051 | 3.727E-01 | 0.948 | cis | Hospitalized COVID-19 |
| 10916_44  | PLA2R                            | Secretory phospholipase A2 receptor                                            | Q13018 | PLA2R1   | chr2:160062615  | Inverse variance weighted | 6  | 0.021  | 0.024 | 3.729E-01 | 0.948 | cis | Hospitalized COVID-19 |
| 9931_20   | Keratin-1                        | Keratin, type II cytoskeletal 1                                                | P04264 | KRT1     | chr12:52680407  | Wald ratio                | 1  | 0.219  | 0.246 | 3.735E-01 | 0.948 | cis | Hospitalized COVID-19 |
| 8956_96   | SREC-II:ECD                      | Scavenger receptor class F member 2:Extracellular domain                       | Q966P6 | SCARF2   | chr22:20437826  | Wald ratio                | 1  | -0.087 | 0.098 | 3.739E-01 | 0.948 | cis | Hospitalized COVID-19 |
| 19376_74  | NNMT                             | Nicotinamide N-methyltransferase                                               | P40261 | NNMT     | chr11:114257787 | Wald ratio                | 1  | 0.152  | 0.171 | 3.745E-01 | 0.948 | cis | Hospitalized COVID-19 |
| 19237_17  | D-dopachrome decarboxylase       | D-dopachrome decarboxylase                                                     | P30046 | DDT      | chr22:23980525  | Inverse variance weighted | 2  | 0.069  | 0.077 | 3.747E-01 | 0.948 | cis | Hospitalized COVID-19 |
| 19173_5   | ZFAN1                            | AN1-type zinc finger protein 1                                                 | Q8TCF1 | ZFAND1   | chr8:81732903   | Inverse variance weighted | 3  | 0.070  | 0.079 | 3.766E-01 | 0.948 | cis | Hospitalized COVID-19 |
| 9748_31   | GSTM3-3                          | Glutathione S-transferase Mu 3                                                 | P21266 | GSTM3    | chr1:109741038  | Inverse variance weighted | 5  | -0.034 | 0.038 | 3.767E-01 | 0.948 | cis | Hospitalized COVID-19 |
| 17722_5   | FKBP52 protein                   | Peptidyl-prolyl cis-trans isomerase FKBP4                                      | Q02790 | FKBP4    | chr12:2794970   | Inverse variance weighted | 2  | 0.130  | 0.147 | 3.768E-01 | 0.948 | cis | Hospitalized COVID-19 |
| 15388_24  | FCRIIa                           | Low affinity immunoglobulin gamma Fc region receptor III-A                     | Q08637 | FCGR3A   | chr1:161550968  | Inverse variance weighted | 6  | -0.041 | 0.047 | 3.773E-01 | 0.948 | cis | Hospitalized COVID-19 |
| 19365_11  | BCAT2                            | Branched-chain-amino-acid aminotransferase, mitochondrial                      | O15382 | BCAT2    | chr19:48811029  | Wald ratio                | 1  | 0.065  | 0.073 | 3.775E-01 | 0.948 | cis | Hospitalized COVID-19 |
| 16322_10  | PACAP                            | Marginal zone B- and B1-cell-specific protein                                  | Q9WU39 | MZB1     | chr5:139390081  | Inverse variance weighted | 3  | -0.096 | 0.109 | 3.777E-01 | 0.948 | cis | Hospitalized COVID-19 |
| 13676_46  | Inhibin b8 chain                 | Inhibin beta B chain                                                           | P09529 | INHBB    | chr2:120346136  | Inverse variance weighted | 4  | 0.023  | 0.027 | 3.784E-01 | 0.948 | cis | Hospitalized COVID-19 |
| 13563_259 | ACB07                            | Acyl-CoA-binding domain-containing protein 7                                   | Q8N6N7 | ACB07    | chr10:15088776  | Wald ratio                | 1  | 0.232  | 0.265 | 3.798E-01 | 0.948 | cis | Hospitalized COVID-19 |
| 8356_88   | NEU1                             | Oxytocin-neurophysin 1                                                         | P01178 | OXT      | chr20:3071620   | Inverse variance weighted | 3  | 0.044  | 0.050 | 3.805E-01 | 0.948 | cis | Hospitalized COVID-19 |
| 9886_28   | XRCC4                            | DNA repair protein XRCC4                                                       | Q13426 | XRCC4    | chr5:83077498   | Wald ratio                | 1  | 0.087  | 0.100 | 3.807E-01 | 0.948 | cis | Hospitalized COVID-19 |
| 16763_11  | LECT2                            | Leukocyte cell-derived chemotaxin-2                                            | O14960 | LECT2    | chr5:135954983  | Inverse variance weighted | 8  | 0.026  | 0.029 | 3.815E-01 | 0.948 | cis | Hospitalized COVID-19 |
| 19188_21  | NAP2L                            | nucleosome assembly protein 1-like 4                                           | Q99733 | NAP1L4   | chr11:2992377   | Wald ratio                | 1  | -0.058 | 0.066 | 3.815E-01 | 0.948 | cis | Hospitalized COVID-19 |
| 19563_3   | SEZBL                            | Seizure 6-like protein                                                         | Q9BYH1 | SEZBL    | chr22:26169462  | Inverse variance weighted | 3  | 0.077  | 0.088 | 3.819E-01 | 0.948 | cis | Hospitalized COVID-19 |
| 11313_100 | PHS                              | Pterin-4-alpha-carbinolamine dehydratase                                       | P61457 | PCBD1    | chr10:70888565  | Inverse variance weighted | 5  | 0.055  | 0.063 | 3.826E-01 | 0.948 | cis | Hospitalized COVID-19 |
| 2819_23   | Cadherin-5                       | Cadherin-5                                                                     | P33151 | CDH5     | chr16:66366622  | Inverse variance weighted | 2  | 0.078  | 0.090 | 3.829E-01 | 0.948 | cis | Hospitalized COVID-19 |
| 16823_75  | APOL3                            | Apolipoprotein L3                                                              | O95236 | APOL3    | chr22:36166177  | Inverse variance weighted | 7  | 0.026  | 0.029 | 3.829E-01 | 0.948 | cis | Hospitalized COVID-19 |
| 8664_36   | PKDCC                            | Extracellular tyrosine-protein kinase PKDCC                                    | Q504Y2 | PKDCC    | chr2:42048021   | Inverse variance weighted | 2  | -0.240 | 0.275 | 3.830E-01 | 0.948 | cis | Hospitalized COVID-19 |

|           |                                  |                                                                                      |                 |                 |                 |                           |    |        |       |           |       |     |                       |
|-----------|----------------------------------|--------------------------------------------------------------------------------------|-----------------|-----------------|-----------------|---------------------------|----|--------|-------|-----------|-------|-----|-----------------------|
| 9468_8    | Lectin, mannose-binding 2        | Vesicular integral-membrane protein VIP36                                            | Q12907          | LMAN2           | chr5:177351840  | Wald ratio                | 1  | 0.119  | 0.137 | 3.834E-01 | 0.948 | cis | Hospitalized COVID-19 |
| 15523_9   | HEM2                             | Delta-aminolevulinic acid dehydratase                                                | P13716          | ALAD            | chr9:113401290  | Inverse variance weighted | 7  | 0.047  | 0.054 | 3.834E-01 | 0.948 | cis | Hospitalized COVID-19 |
| 4314_12   | XTP3A                            | dCTP pyrophosphatase 1                                                               | Q9H773          | DCTPP1          | chr16:30430030  | Wald ratio                | 1  | 0.116  | 0.133 | 3.839E-01 | 0.948 | cis | Hospitalized COVID-19 |
| 6049_64   | PTPRS                            | Receptor-type tyrosine-protein phosphatase 5                                         | Q13332          | PTPRS           | chr19:5340812   | Wald ratio                | 1  | 0.108  | 0.124 | 3.841E-01 | 0.948 | cis | Hospitalized COVID-19 |
| 5061_27   | B7-H2                            | ICOS ligand                                                                          | Q75144          | ICOSLG          | chr21:44241446  | Wald ratio                | 1  | -0.184 | 0.212 | 3.855E-01 | 0.948 | cis | Hospitalized COVID-19 |
| 18396_10  | AES                              | Amino-terminal enhancer of split                                                     | Q08117          | TLE5            | chr19:3063107   | Wald ratio                | 1  | -0.185 | 0.213 | 3.855E-01 | 0.948 | cis | Hospitalized COVID-19 |
| 13704_5   | HMC52                            | Hydroxymethylglutaryl-CoA synthase, mitochondrial                                    | P54868          | HMGCS2          | chr1:119768905  | Wald ratio                | 1  | 0.192  | 0.221 | 3.864E-01 | 0.948 | cis | Hospitalized COVID-19 |
| 6572_10   | LRRT4:ECD                        | Leucine-rich repeat transmembrane neuronal protein 4:isoform 2, Extracellular domain | Q86VH4          | LRRTM4          | chr7:7593319    | Wald ratio                | 1  | -0.188 | 0.217 | 3.865E-01 | 0.948 | cis | Hospitalized COVID-19 |
| 4153_11   | alpha-1-antichymotrypsin complex | Alpha-1-antichymotrypsin complex                                                     | P07288   P01011 | KLK3   SERPINA3 | chr14:94612384  | Inverse variance weighted | 3  | -0.087 | 0.101 | 3.871E-01 | 0.948 | cis | Hospitalized COVID-19 |
| 3171_57   | amyloid precursor protein        | Amyloid beta A4 protein                                                              | P05067          | APP             | chr21:26171128  | Wald ratio                | 1  | 0.119  | 0.138 | 3.875E-01 | 0.948 | cis | Hospitalized COVID-19 |
| 13697_51  | GPDA                             | Glycerol-3-phosphate dehydrogenase [NAD(+)], cytoplasmic                             | P21695          | GPD1            | chr12:50103982  | Wald ratio                | 1  | 0.114  | 0.132 | 3.882E-01 | 0.948 | cis | Hospitalized COVID-19 |
| 12635_9   | TRDMT                            | tRNA (cytosine(38)-C(5))-methyltransferase                                           | Q14717          | TRDMT1          | chr10:17202054  | Inverse variance weighted | 4  | -0.045 | 0.052 | 3.891E-01 | 0.948 | cis | Hospitalized COVID-19 |
| 6507_16   | NCAM2                            | Neural cell adhesion molecule 2                                                      | Q15394          | NCAM2           | chr21:20998409  | Inverse variance weighted | 6  | 0.025  | 0.029 | 3.897E-01 | 0.948 | cis | Hospitalized COVID-19 |
| 12517_52  | TFAR19                           | Programmed cell death protein 5                                                      | Q14737          | PDCD5           | chr19:32581190  | Inverse variance weighted | 4  | -0.030 | 0.035 | 3.901E-01 | 0.948 | cis | Hospitalized COVID-19 |
| 3329_14   | PGRP-S                           | Peptidoglycan recognition protein 1                                                  | Q75594          | PGLYRP1         | chr19:46023053  | Inverse variance weighted | 4  | -0.044 | 0.051 | 3.901E-01 | 0.948 | cis | Hospitalized COVID-19 |
| 6409_57   | GP116                            | Adhesion G protein-coupled receptor F5                                               | Q80888          | ADGRF5          | chr6:46954943   | Inverse variance weighted | 7  | -0.017 | 0.019 | 3.904E-01 | 0.948 | cis | Hospitalized COVID-19 |
| 5649_83   | PSG4                             | Pregnancy-specific beta-1-glycoprotein 4                                             | Q00888          | PSG4            | chr19:43207299  | Inverse variance weighted | 3  | -0.068 | 0.080 | 3.913E-01 | 0.948 | cis | Hospitalized COVID-19 |
| 5660_51   | SOD3                             | Extracellular superoxide dismutase [Cu-Zn]                                           | P08294          | SOD3            | chr4:24789912   | Inverse variance weighted | 9  | -0.022 | 0.025 | 3.920E-01 | 0.948 | cis | Hospitalized COVID-19 |
| 19523_215 | PARK7                            | Protein DJ-1                                                                         | Q99497          | PARK7           | chr1:7954291    | Wald ratio                | 1  | -0.083 | 0.097 | 3.925E-01 | 0.948 | cis | Hospitalized COVID-19 |
| 15462_28  | CD8A                             | T-cell surface glycoprotein CD8 alpha chain                                          | P01732          | CD8A            | chr2:86808396   | Inverse variance weighted | 2  | -0.028 | 0.033 | 3.925E-01 | 0.948 | cis | Hospitalized COVID-19 |
| 7161_25   | G6PE                             | GDH/6PGL endoplasmic bifunctional protein                                            | Q95479          | H6PD            | chr1:9234774    | Inverse variance weighted | 9  | -0.026 | 0.031 | 3.942E-01 | 0.948 | cis | Hospitalized COVID-19 |
| 15509_2   | NAG                              | Alpha-N-acetylglucosaminidase                                                        | P54802          | NAGLU           | chr17:42536241  | Inverse variance weighted | 6  | 0.017  | 0.020 | 3.947E-01 | 0.948 | cis | Hospitalized COVID-19 |
| 7970_315  | NAR3                             | Ecto-ADP-ribosyltransferase 3                                                        | Q13508          | ART3            | chr4:76011184   | Inverse variance weighted | 4  | 0.039  | 0.046 | 3.955E-01 | 0.948 | cis | Hospitalized COVID-19 |
| 11369_23  | ADHX                             | Alcohol dehydrogenase class-3                                                        | P11766          | ADH5            | chr4:99088801   | Inverse variance weighted | 3  | -0.136 | 0.160 | 3.955E-01 | 0.948 | cis | Hospitalized COVID-19 |
| 5346_24   | CPNE1:C2, 1 and 2                | Copine-1:Ca2+-dependent membrane-targeting module domains 1 and 2                    | Q99829          | CPNE1           | chr20:35664956  | Inverse variance weighted | 9  | 0.016  | 0.019 | 3.965E-01 | 0.948 | cis | Hospitalized COVID-19 |
| 6617_12   | FCRL6                            | Fc receptor-like protein 6                                                           | Q6DN72          | FCRL6           | chr1:159800511  | Wald ratio                | 1  | -0.074 | 0.088 | 3.979E-01 | 0.948 | cis | Hospitalized COVID-19 |
| 17672_184 | Gastric intrinsic factor         | Gastric intrinsic factor                                                             | P27352          | CBLF            | chr11:59845499  | Inverse variance weighted | 2  | 0.097  | 0.114 | 3.982E-01 | 0.948 | cis | Hospitalized COVID-19 |
| 7948_129  | GLTD2                            | Glycolipid transfer protein domain-containing protein 2                              | AGNH11          | GLTPD2          | chr17:4788964   | Inverse variance weighted | 3  | 0.041  | 0.048 | 3.983E-01 | 0.948 | cis | Hospitalized COVID-19 |
| 4886_3    | MCP-3                            | C-C motif chemokine 7                                                                | P80098          | CCL7            | chr17:34270221  | Inverse variance weighted | 4  | -0.065 | 0.077 | 3.992E-01 | 0.948 | cis | Hospitalized COVID-19 |
| 7648_9    | MYPCL1                           | Myosin-binding protein C, slow-type                                                  | Q00872          | MYBPC1          | chr12:101568353 | Wald ratio                | 1  | 0.104  | 0.124 | 3.993E-01 | 0.948 | cis | Hospitalized COVID-19 |
| 19614_8   | Holo-TC I                        | Transcobalamin-1                                                                     | P20061          | TCN1            | chr11:59866489  | Inverse variance weighted | 5  | -0.035 | 0.041 | 4.006E-01 | 0.948 | cis | Hospitalized COVID-19 |
| 17210_2   | TCL1A                            | T-cell leukemia/lymphoma protein 1A                                                  | P56279          | TCL1A           | chr14:95714196  | Inverse variance weighted | 3  | -0.043 | 0.052 | 4.006E-01 | 0.948 | cis | Hospitalized COVID-19 |
| 17170_15  | CALCB                            | Calcitonin gene-related peptide 2                                                    | P10092          | CALCB           | chr11:14904997  | Inverse variance weighted | 2  | -0.039 | 0.047 | 4.014E-01 | 0.948 | cis | Hospitalized COVID-19 |
| 7955_195  | ITI heavy chain H1               | Inter-alpha-trypsin inhibitor heavy chain H1                                         | P19827          | ITIH1           | chr3:52777595   | Inverse variance weighted | 7  | 0.047  | 0.056 | 4.021E-01 | 0.948 | cis | Hospitalized COVID-19 |
| 11643_73  | DTX3L                            | E3 ubiquitin-protein ligase DTX3L                                                    | Q8TD86          | DTX3L           | chr3:122564338  | Wald ratio                | 1  | -0.160 | 0.191 | 4.028E-01 | 0.948 | cis | Hospitalized COVID-19 |
| 7841_84   | ESAM                             | Endothelial cell-selective adhesion molecule                                         | Q96A67          | ESAM            | chr11:124762290 | Inverse variance weighted | 6  | 0.034  | 0.040 | 4.035E-01 | 0.948 | cis | Hospitalized COVID-19 |
| 3212_30   | ASAH2                            | Neutral ceramidase                                                                   | Q9NR71          | ASAH2           | chr10:50279720  | Inverse variance weighted | 5  | -0.017 | 0.021 | 4.045E-01 | 0.948 | cis | Hospitalized COVID-19 |
| 6984_6    | IGSF8                            | Immunoglobulin superfamily member 8                                                  | Q96990          | IGSF8           | chr1:160098943  | Inverse variance weighted | 2  | 0.056  | 0.068 | 4.054E-01 | 0.948 | cis | Hospitalized COVID-19 |
| 2982_82   | Galectin-4                       | Galectin-4                                                                           | P56470          | LGALS4          | chr19:38812945  | Wald ratio                | 1  | -0.152 | 0.183 | 4.076E-01 | 0.948 | cis | Hospitalized COVID-19 |
| 13578_98  | ABLM3                            | Actin-binding LIM protein 3                                                          | Q94929          | ABLM3           | chr5:149141483  | Wald ratio                | 1  | -0.082 | 0.098 | 4.077E-01 | 0.948 | cis | Hospitalized COVID-19 |
| 3581_53   | a2-HS-Glycoprotein               | Alpha-2-HS-glycoprotein                                                              | P02765          | AHSG            | chr3:186613060  | Inverse variance weighted | 4  | -0.067 | 0.081 | 4.077E-01 | 0.948 | cis | Hospitalized COVID-19 |
| 17814_8   | BPNT1                            | 3'(2'),5'-bisphosphate nucleotidase 1                                                | Q95861          | BPNT1           | chr1:220090462  | Wald ratio                | 1  | 0.152  | 0.184 | 4.081E-01 | 0.948 | cis | Hospitalized COVID-19 |
| 9263_57   | SIAE                             | Sialate O-acetyltransferase                                                          | Q9HA72          | SIAE            | chr11:124695707 | Wald ratio                | 1  | 0.091  | 0.111 | 4.100E-01 | 0.948 | cis | Hospitalized COVID-19 |
| 6527_1    | TRIL:ECD                         | TLR4 interactor with leucine rich repeats:Extracellular domain                       | Q7L0X0          | TRIL            | chr7:28958330   | Wald ratio                | 1  | 0.109  | 0.133 | 4.100E-01 | 0.948 | cis | Hospitalized COVID-19 |
| 7891_45   | UGT 1A6                          | UDP-glucuronosyltransferase 1-6                                                      | P19224          | UGT1A6          | chr2:233691607  | Inverse variance weighted | 4  | -0.067 | 0.082 | 4.109E-01 | 0.948 | cis | Hospitalized COVID-19 |
| 17677_47  | BY55                             | CD160 antigen                                                                        | Q95971          | CD160           | chr1:145719471  | Wald ratio                | 1  | -0.080 | 0.097 | 4.117E-01 | 0.948 | cis | Hospitalized COVID-19 |
| 15468_14  | FHR1                             | Complement factor H-related protein 1                                                | Q03591          | CFHR1           | chr1:196819731  | Inverse variance weighted | 6  | -0.027 | 0.033 | 4.119E-01 | 0.948 | cis | Hospitalized COVID-19 |
| 14090_23  | DEFI6                            | Differentially expressed in FDCP 6 homolog                                           | Q9HA47          | DEF6            | chr6:35297818   | Inverse variance weighted | 2  | -0.047 | 0.057 | 4.122E-01 | 0.948 | cis | Hospitalized COVID-19 |
| 3079_62   | TIG2                             | Retinoic acid receptor responder protein 2                                           | Q99969          | RARRS2          | chr7:150341662  | Inverse variance weighted | 2  | 0.052  | 0.064 | 4.126E-01 | 0.948 | cis | Hospitalized COVID-19 |
| 17813_21  | BPHL                             | Valacyclovir hydrolase                                                               | Q86WA6          | BPHL            | chr6:3118374    | Inverse variance weighted | 2  | 0.098  | 0.120 | 4.128E-01 | 0.948 | cis | Hospitalized COVID-19 |
| 19615_213 | SNT3                             | Cytosolic 5'-nucleotidase 3A                                                         | Q9H0P0          | NTSC3A          | chr7:33062796   | Wald ratio                | 1  | 0.108  | 0.132 | 4.134E-01 | 0.948 | cis | Hospitalized COVID-19 |
| 7019_13   | Semaphorin-7A                    | Semaphorin-7A                                                                        | Q75326          | SEMA7A          | chr15:74433958  | Wald ratio                | 1  | 0.104  | 0.128 | 4.136E-01 | 0.948 | cis | Hospitalized COVID-19 |
| 13666_222 | Carbonic Anhydrase X             | Carbonic anhydrase-related protein 10                                                | Q9NS85          | CA10            | chr17:52160017  | Inverse variance weighted | 4  | -0.040 | 0.050 | 4.146E-01 | 0.948 | cis | Hospitalized COVID-19 |
| 9416_77   | CBPM                             | Carboxypeptidase M                                                                   | P14384          | CPM             | chr12:68971570  | Wald ratio                | 1  | 0.086  | 0.106 | 4.151E-01 | 0.948 | cis | Hospitalized COVID-19 |
| 11431_235 | RECO1                            | ATP-dependent DNA helicase Q1                                                        | P46063          | RECQL           | chr12:21501669  | Inverse variance weighted | 7  | 0.018  | 0.022 | 4.160E-01 | 0.948 | cis | Hospitalized COVID-19 |
| 10534_40  | PARP-BRCT domain                 | Poly [ADP-ribose] polymerase 1:BRCA1 C-terminal:BRCA1 C-terminus domain              | P09874          | PARP1           | chr1:226408154  | Wald ratio                | 1  | -0.179 | 0.220 | 4.160E-01 | 0.948 | cis | Hospitalized COVID-19 |
| 5404_53   | DR6                              | Tumor necrosis factor receptor superfamily member 21                                 | Q75509          | TNFRSF21        | chr6:47309905   | Inverse variance weighted | 2  | -0.084 | 0.104 | 4.163E-01 | 0.948 | cis | Hospitalized COVID-19 |
| 19496_1   | NPL                              | N-acetylneuraminidase lyase                                                          | Q9BXD5          | NPL             | chr1:182789293  | Inverse variance weighted | 3  | -0.050 | 0.061 | 4.165E-01 | 0.948 | cis | Hospitalized COVID-19 |
| 3389_7    | PCI                              | Plasma serine protease inhibitor                                                     | P05154          | SERPINA5        | chr14:94561442  | Inverse variance weighted | 2  | -0.114 | 0.141 | 4.167E-01 | 0.948 | cis | Hospitalized COVID-19 |
| 9574_11   | BIN1                             | Myc box-dependent-interacting protein 1                                              | Q00499          | BIN1            | chr12:127107288 | Inverse variance weighted | 2  | 0.058  | 0.072 | 4.167E-01 | 0.948 | cis | Hospitalized COVID-19 |
| 3151_6    | IL-2 sRa                         | Interleukin-2 receptor subunit alpha                                                 | P01589          | IL2RA           | chr10:6062370   | Wald ratio                | 1  | 0.093  | 0.114 | 4.168E-01 | 0.948 | cis | Hospitalized COVID-19 |
| 18310_26  | SELW                             | Selenoprotein W                                                                      | P63302          | SELENOW         | chr19:47778677  | Inverse variance weighted | 3  | 0.054  | 0.066 | 4.171E-01 | 0.948 | cis | Hospitalized COVID-19 |
| 5483_1    | RGMA                             | Repulsive guidance molecule A                                                        | Q96886          | RGMA            | chr15:93089211  | Inverse variance weighted | 4  | 0.044  | 0.054 | 4.178E-01 | 0.948 | cis | Hospitalized COVID-19 |
| 17819_30  | FAHD1                            | Acylpyruvase FAHD1, mitochondrial                                                    | Q6P587          | FAHD1           | chr16:1826967   | Inverse variance weighted | 3  | 0.092  | 0.113 | 4.179E-01 | 0.948 | cis | Hospitalized COVID-19 |
| 5108_72   | Notch-3                          | Neurogenic locus notch homolog protein 3                                             | Q9UM47          | NOTCH3          | chr19:15200995  | Wald ratio                | 1  | -0.096 | 0.119 | 4.182E-01 | 0.948 | cis | Hospitalized COVID-19 |
| 6990_44   | SDF2L                            | Stromal cell-derived factor 2-like protein 1                                         | Q9UNC8          | SDF2L1          | chr22:21642302  | Wald ratio                | 1  | 0.147  | 0.183 | 4.207E-01 | 0.948 | cis | Hospitalized COVID-19 |
| 10512_13  | IL3RB:ECD                        | Cytokine receptor common subunit beta:Extracellular domain                           | P32927          | CSF2RB          | chr22:36913628  | Inverse variance weighted | 7  | -0.016 | 0.019 | 4.208E-01 | 0.948 | cis | Hospitalized COVID-19 |
| 3169_70   | IDUA                             | Alpha-L-iduronidase                                                                  | P35475          | IDUA            | chr4:986997     | Inverse variance weighted | 7  | 0.046  | 0.057 | 4.215E-01 | 0.948 | cis | Hospitalized COVID-19 |
| 4141_79   | IP-10                            | C-X-C motif chemokine 10                                                             | Q02778          | CXCL10          | chr4:76023497   | Wald ratio                | 1  | -0.171 | 0.213 | 4.217E-01 | 0.948 | cis | Hospitalized COVID-19 |
| 15515_2   | SAA                              | Serum amyloid A-1 protein                                                            | P0D1I8          | SAA1            | chr11:18266260  | Inverse variance weighted | 4  | -0.067 | 0.084 | 4.221E-01 | 0.948 | cis | Hospitalized COVID-19 |
| 7822_11   | HRS12                            | HRAS-like suppressor 2                                                               | Q8NWV9          | PLAAT2          | chr11:63563379  | Wald ratio                | 1  | -0.178 | 0.222 | 4.228E-01 | 0.948 | cis | Hospitalized COVID-19 |
| 15622_13  | OBCCAM                           | Opioid-binding protein/cell adhesion molecule                                        | Q14982          | OPCML           | chr11:133532501 | Wald ratio                | 1  | -0.175 | 0.219 | 4.229E-01 | 0.948 | cis | Hospitalized COVID-19 |
| 15471_29  | LIPR2                            | Pancreatic lipase-related protein 2                                                  | P54317          | PNLIPRP2        | chr10:116620953 | Inverse variance weighted | 11 | 0.012  | 0.015 | 4.252E-01 | 0.948 | cis | Hospitalized COVID-19 |
| 6448_36   | Sema 4                           | Semaphorin-3C                                                                        | Q99985          | SEMA3C          | chr7:80922359   | Inverse variance weighted | 2  | -0.067 | 0.085 | 4.259E-01 | 0.948 | cis | Hospitalized COVID-19 |
| 15521_4   | Alcadin alpha-1                  | Calsynin-1                                                                           | Q94985          | CLSTN1          | chr1:9823984    | Inverse variance weighted | 6  | 0.012  | 0.015 | 4.261E-01 | 0.948 | cis | Hospitalized COVID-19 |
| 16049_43  | OLR1                             | Oxidized low-density lipoprotein receptor 1                                          | P78380          | OLR1            | chr12:10172138  | Wald ratio                | 1  | 0.105  | 0.132 | 4.262E-01 | 0.948 | cis | Hospitalized COVID-19 |
| 12851_5   | DPOLM                            | DNA-directed DNA/RNA polymerase mu                                                   | Q9NP87          | POLM            | chr7:44082530   | Inverse variance weighted | 3  | 0.054  | 0.068 | 4.264E-01 | 0.948 | cis | Hospitalized COVID-19 |
| 3470_1    | sE-Selectin                      | E-selectin                                                                           | P16581          | SELE            | chr7:169764705  | Wald ratio                | 1  | 0.103  | 0.129 | 4.265E-01 | 0.948 | cis | Hospitalized COVID-19 |



|           |                              |                                                                          |        |           |                 |                           |    |        |       |           |       |     |                       |
|-----------|------------------------------|--------------------------------------------------------------------------|--------|-----------|-----------------|---------------------------|----|--------|-------|-----------|-------|-----|-----------------------|
| 9339_204  | FKBP2                        | Peptidyl-prolyl cis-trans isomerase FKBP2                                | P26885 | FKBP2     | chr11:64241003  | Wald ratio                | 1  | -0.147 | 0.202 | 4.673E-01 | 0.948 | cis | Hospitalized COVID-19 |
| 5634_39   | OFUT1                        | GDP-fucose protein O-fucosyltransferase 1                                | Q9H488 | POFUT1    | chr20:32207855  | Inverse variance weighted | 3  | -0.030 | 0.042 | 4.678E-01 | 0.948 | cis | Hospitalized COVID-19 |
| 19113_66  | SH3L2                        | SH3 domain-binding glutamic acid-rich-like protein 2                     | Q9UIC5 | SH3BGR12  | chr6:79631329   | Wald ratio                | 1  | -0.072 | 0.100 | 4.692E-01 | 0.948 | cis | Hospitalized COVID-19 |
| 9906_21   | TICN3                        | Testican-3                                                               | Q9BQ16 | SPOCK3    | chr4:167234796  | Inverse variance weighted | 11 | 0.017  | 0.023 | 4.695E-01 | 0.948 | cis | Hospitalized COVID-19 |
| 5353_89   | IL-1Ra                       | Interleukin-1 receptor antagonist protein                                | P18510 | IL1RN     | chr2:113099315  | Inverse variance weighted | 3  | 0.034  | 0.047 | 4.701E-01 | 0.948 | cis | Hospitalized COVID-19 |
| 12855_16  | CTO32                        | Cas scaffolding protein family member 4                                  | Q9NQ75 | CASSA     | chr20:56412112  | Wald ratio                | 1  | -0.141 | 0.196 | 4.711E-01 | 0.948 | cis | Hospitalized COVID-19 |
| 12831_21  | TESC                         | Calcineurin B homologous protein 3                                       | Q96852 | TESC      | chr12:117099479 | Inverse variance weighted | 6  | 0.022  | 0.031 | 4.722E-01 | 0.948 | cis | Hospitalized COVID-19 |
| 10391_1   | ANGL3                        | Angiopietin-related protein 3                                            | Q9Y5C1 | ANGPTL3   | chr1:62597520   | Inverse variance weighted | 7  | -0.023 | 0.032 | 4.738E-01 | 0.948 | cis | Hospitalized COVID-19 |
| 17341_89  | TH1C                         | Acetyl-CoA acetyltransferase, cytosolic                                  | Q9BW11 | ACA2T     | chr6:159762045  | Inverse variance weighted | 3  | 0.025  | 0.036 | 4.746E-01 | 0.948 | cis | Hospitalized COVID-19 |
| 14158_17  | Annexin V                    | Annexin A5                                                               | P08758 | ANXA5     | chr4:121696995  | Inverse variance weighted | 2  | 0.101  | 0.142 | 4.749E-01 | 0.948 | cis | Hospitalized COVID-19 |
| 19367_34  | D3D2                         | Enoyl-CoA delta isomerase 1, mitochondrial                               | P42126 | EC11      | chr16:2252300   | Inverse variance weighted | 2  | 0.077  | 0.108 | 4.759E-01 | 0.948 | cis | Hospitalized COVID-19 |
| 18401_18  | ALKB3                        | Alpha-ketoglutarate-dependent dioxygenase alkB homolog 3                 | Q96K83 | ALKBH3    | chr11:43880811  | Inverse variance weighted | 3  | -0.039 | 0.055 | 4.772E-01 | 0.948 | cis | Hospitalized COVID-19 |
| 8303_102  | MYG1                         | UPF0160 protein MYG1, mitochondrial                                      | Q9HB07 | MYG1      | chr12:53299695  | Wald ratio                | 1  | 0.118  | 0.167 | 4.774E-01 | 0.948 | cis | Hospitalized COVID-19 |
| 2635_61   | Laylin                       | Laylin                                                                   | Q6UX15 | LAYN      | chr11:111540280 | Wald ratio                | 1  | -0.132 | 0.186 | 4.776E-01 | 0.948 | cis | Hospitalized COVID-19 |
| 8814_33   | SAPL1                        | Proactivator polypeptide-like 1                                          | Q6NU11 | PSAPL1    | chr4:7434930    | Inverse variance weighted | 8  | -0.020 | 0.028 | 4.776E-01 | 0.948 | cis | Hospitalized COVID-19 |
| 18918_86  | PDE4A                        | cAMP-specific 3',5'-cyclic phosphodiesterase 4A                          | P27815 | PDE4A     | chr19:10416773  | Inverse variance weighted | 4  | -0.054 | 0.076 | 4.784E-01 | 0.948 | cis | Hospitalized COVID-19 |
| 13720_95  | Proteinase-3                 | Myeloblastin                                                             | P24158 | PRTN3     | chr19:840999    | Inverse variance weighted | 7  | -0.017 | 0.025 | 4.794E-01 | 0.948 | cis | Hospitalized COVID-19 |
| 5663_18   | PF4V                         | Platelet factor 4 variant                                                | P10720 | PF4V1     | chr4:73853296   | Inverse variance weighted | 2  | 0.113  | 0.160 | 4.798E-01 | 0.948 | cis | Hospitalized COVID-19 |
| 12687_2   | DECR                         | 2,4-dienoyl-CoA reductase, mitochondrial                                 | Q16698 | DEC1R     | chr8:90001405   | Inverse variance weighted | 3  | -0.138 | 0.195 | 4.803E-01 | 0.948 | cis | Hospitalized COVID-19 |
| 2750_3    | Apo A-I                      | Apolipoprotein A-I                                                       | P02647 | APOA1     | chr11:116837622 | Inverse variance weighted | 3  | -0.049 | 0.069 | 4.805E-01 | 0.948 | cis | Hospitalized COVID-19 |
| 13473_55  | IP3KA                        | Inositol-trisphosphate 3-kinase A                                        | P23677 | ITPKA     | chr15:41493393  | Wald ratio                | 1  | 0.104  | 0.147 | 4.805E-01 | 0.948 | cis | Hospitalized COVID-19 |
| 5688_65   | CBLN4                        | Cerebellin-4                                                             | Q9NTU7 | CBLN4     | chr20:56005519  | Inverse variance weighted | 5  | -0.031 | 0.044 | 4.809E-01 | 0.948 | cis | Hospitalized COVID-19 |
| 3184_25   | Coagulation Factor VII       | Coagulation factor VII                                                   | P08709 | F7        | chr13:113105788 | Inverse variance weighted | 7  | 0.017  | 0.024 | 4.813E-01 | 0.948 | cis | Hospitalized COVID-19 |
| 3324_51   | LY9                          | T-lymphocyte surface antigen Ly-9                                        | Q9HBG7 | LY9       | chr1:160796074  | Inverse variance weighted | 5  | 0.041  | 0.059 | 4.828E-01 | 0.948 | cis | Hospitalized COVID-19 |
| 17787_1   | Enoyl-CoA hydratase          | Enoyl-CoA hydratase, mitochondrial                                       | P30084 | ECHS1     | chr10:133373354 | Wald ratio                | 1  | 0.135  | 0.193 | 4.829E-01 | 0.948 | cis | Hospitalized COVID-19 |
| 18934_50  | Tissue transglutaminase      | Protein-glutamine gamma-glutamyltransferase 2                            | P21980 | TGM2      | chr20:38166578  | Wald ratio                | 1  | 0.038  | 0.055 | 4.833E-01 | 0.948 | cis | Hospitalized COVID-19 |
| 8097_77   | LIPN                         | Lipase member N                                                          | Q5VKI9 | LIPN      | chr10:88759982  | Inverse variance weighted | 6  | -0.019 | 0.028 | 4.837E-01 | 0.948 | cis | Hospitalized COVID-19 |
| 10714_7   | ACE                          | Angiotensin-converting enzyme                                            | P12821 | ACE       | chr17:63477061  | Inverse variance weighted | 11 | -0.012 | 0.017 | 4.838E-01 | 0.948 | cis | Hospitalized COVID-19 |
| 3327_27   | NET4                         | Netrin-4                                                                 | Q9HB63 | NTN4      | chr12:95791189  | Inverse variance weighted | 3  | 0.049  | 0.071 | 4.840E-01 | 0.948 | cis | Hospitalized COVID-19 |
| 12633_3   | PTN9                         | Tyrosine-protein phosphatase non-receptor type 9                         | P43378 | PTPN9     | chr15:75579315  | Wald ratio                | 1  | -0.125 | 0.178 | 4.840E-01 | 0.948 | cis | Hospitalized COVID-19 |
| 9841_197  | Multifunctional protein ADE2 | Multifunctional protein ADE2                                             | P22234 | PAICS     | chr4:56435741   | Wald ratio                | 1  | 0.091  | 0.131 | 4.842E-01 | 0.948 | cis | Hospitalized COVID-19 |
| 11177_16  | K2C5                         | Keratin, type II cytoskeletal 5                                          | P13647 | KRT5      | chr12:52520530  | Inverse variance weighted | 2  | -0.105 | 0.151 | 4.846E-01 | 0.948 | cis | Hospitalized COVID-19 |
| 18218_48  | CB032                        | CB1 cannabinoid receptor-interacting protein 1                           | Q96F85 | CNRIP1    | chr2:68320051   | Inverse variance weighted | 7  | 0.020  | 0.028 | 4.846E-01 | 0.948 | cis | Hospitalized COVID-19 |
| 17746_77  | FIS1                         | Mitochondrial fission 1 protein                                          | Q9Y306 | FIS1      | chr7:101252316  | Inverse variance weighted | 2  | 0.106  | 0.152 | 4.856E-01 | 0.948 | cis | Hospitalized COVID-19 |
| 6919_3    | HBAZ                         | Hemoglobin subunit zeta                                                  | P02008 | HBB       | chr16:142728    | Inverse variance weighted | 6  | -0.015 | 0.021 | 4.863E-01 | 0.948 | cis | Hospitalized COVID-19 |
| 15308_108 | VWC2                         | Borin                                                                    | Q2TAL6 | VWC2      | chr7:49773638   | Inverse variance weighted | 7  | 0.024  | 0.034 | 4.863E-01 | 0.948 | cis | Hospitalized COVID-19 |
| 5069_9    | DAF                          | Complement decay-accelerating factor                                     | P08174 | CD55      | chr12:207321519 | Inverse variance weighted | 4  | 0.033  | 0.048 | 4.865E-01 | 0.948 | cis | Hospitalized COVID-19 |
| 19153_53  | MPPD2                        | Metallophosphoesterase MPPD2                                             | Q15777 | MPPED2    | chr11:30586872  | Inverse variance weighted | 2  | 0.068  | 0.099 | 4.873E-01 | 0.948 | cis | Hospitalized COVID-19 |
| 4276_10   | prostatic binding protein    | Phosphatidylethanolamine-binding protein 1                               | P30086 | PEBP1     | chr12:118136124 | Inverse variance weighted | 7  | -0.022 | 0.032 | 4.885E-01 | 0.948 | cis | Hospitalized COVID-19 |
| 17224_12  | MIME                         | Mimecan                                                                  | P20774 | OGN       | chr9:92404696   | Inverse variance weighted | 6  | 0.036  | 0.052 | 4.886E-01 | 0.948 | cis | Hospitalized COVID-19 |
| 11516_7   | FABPL                        | Fatty acid-binding protein, liver                                        | P07148 | FABP1     | chr2:88128062   | Wald ratio                | 1  | -0.063 | 0.091 | 4.889E-01 | 0.948 | cis | Hospitalized COVID-19 |
| 5089_11   | IL-7 Ra                      | Interleukin-7 receptor subunit alpha                                     | P16871 | IL7R      | chr5:35852695   | Wald ratio                | 1  | -0.119 | 0.172 | 4.890E-01 | 0.948 | cis | Hospitalized COVID-19 |
| 5066_134  | CLM6                         | CMRF35-like molecule 6                                                   | Q08708 | CD300C    | chr17:74546115  | Inverse variance weighted | 4  | -0.058 | 0.083 | 4.895E-01 | 0.948 | cis | Hospitalized COVID-19 |
| 12437_18  | ULK3                         | Serine/threonine-protein kinase ULK3                                     | Q6PHR2 | ULK3      | chr15:74843346  | Wald ratio                | 1  | 0.137  | 0.198 | 4.895E-01 | 0.948 | cis | Hospitalized COVID-19 |
| 10042_8   | SGK3                         | Serine/threonine-protein kinase Sgk3                                     | Q96R11 | SGK3      | chr8:66712734   | Wald ratio                | 1  | -0.141 | 0.205 | 4.912E-01 | 0.948 | cis | Hospitalized COVID-19 |
| 3580_25   | a1-Antitrypsin               | Alpha-1-antitrypsin                                                      | P01009 | SERPINA1  | chr14:94390693  | Inverse variance weighted | 7  | -0.013 | 0.019 | 4.912E-01 | 0.948 | cis | Hospitalized COVID-19 |
| 13434_172 | PARVA                        | Alpha-parvin                                                             | Q9NV07 | PARVA     | chr11:12377563  | Wald ratio                | 1  | -0.081 | 0.118 | 4.913E-01 | 0.948 | cis | Hospitalized COVID-19 |
| 13671_40  | Elastase                     | Neutrophil elastase                                                      | P08246 | ELANE     | chr19:851014    | Inverse variance weighted | 5  | -0.030 | 0.044 | 4.914E-01 | 0.948 | cis | Hospitalized COVID-19 |
| 5400_52   | sLeptin R                    | Leptin receptor, soluble                                                 | P48357 | LEPR      | chr1:65420652   | Inverse variance weighted | 10 | 0.012  | 0.018 | 4.921E-01 | 0.948 | cis | Hospitalized COVID-19 |
| 7244_16   | TM149                        | IGF-like family receptor 1                                               | Q9H665 | IGF1R1    | chr19:35742453  | Inverse variance weighted | 4  | 0.014  | 0.021 | 4.929E-01 | 0.948 | cis | Hospitalized COVID-19 |
| 6551_94   | Vaspin                       | Serpin A12                                                               | Q8BW75 | SERPINA12 | chr14:94517844  | Inverse variance weighted | 5  | -0.019 | 0.028 | 4.931E-01 | 0.948 | cis | Hospitalized COVID-19 |
| 2590_69   | ROR1                         | Inactive tyrosine-protein kinase transmembrane receptor ROR1             | Q01973 | ROR1      | chr1:63774017   | Inverse variance weighted | 3  | -0.028 | 0.040 | 4.932E-01 | 0.948 | cis | Hospitalized COVID-19 |
| 4480_59   | C3b                          | Complement C3b                                                           | P01024 | C3        | chr19:6730562   | Wald ratio                | 1  | -0.162 | 0.238 | 4.947E-01 | 0.948 | cis | Hospitalized COVID-19 |
| 12727_7   | PPRP                         | Prostaglandin F2 receptor negative regulator                             | Q9P282 | PTGFRN    | chr1:116909916  | Inverse variance weighted | 8  | 0.018  | 0.026 | 4.955E-01 | 0.948 | cis | Hospitalized COVID-19 |
| 5687_5    | GLU2B                        | Glucosidase 2 subunit beta                                               | P14314 | PRKCSH    | chr19:11435284  | Wald ratio                | 1  | -0.128 | 0.188 | 4.957E-01 | 0.948 | cis | Hospitalized COVID-19 |
| 13597_20  | RAB31                        | Ras-related protein Rab-31                                               | Q13636 | RAB31     | chr18:9708275   | Inverse variance weighted | 3  | 0.054  | 0.080 | 4.959E-01 | 0.948 | cis | Hospitalized COVID-19 |
| 4908_6    | Endoglin                     | Endoglin                                                                 | P17813 | ENG       | chr9:127854658  | Inverse variance weighted | 3  | -0.043 | 0.063 | 4.961E-01 | 0.948 | cis | Hospitalized COVID-19 |
| 7208_60   | MGT4C                        | Alpha-1,3-mannosyl-glycoprotein 4-beta-N-acetylglucosaminyltransferase C | Q9UBM8 | MGT4C     | chr12:86838904  | Wald ratio                | 1  | 0.114  | 0.167 | 4.961E-01 | 0.948 | cis | Hospitalized COVID-19 |
| 4775_34   | Gelsolin                     | Gelsolin                                                                 | P06396 | GSN       | chr9:121207794  | Inverse variance weighted | 2  | -0.058 | 0.086 | 4.969E-01 | 0.948 | cis | Hospitalized COVID-19 |
| 5006_71   | MK13                         | Mitogen-activated protein kinase 13                                      | O15264 | MAPK13    | chr6:36127809   | Wald ratio                | 1  | -0.077 | 0.114 | 4.970E-01 | 0.948 | cis | Hospitalized COVID-19 |
| 3617_80   | HGFA                         | Hepatocyte growth factor activator                                       | Q04756 | HGFAC     | chr4:3441968    | Inverse variance weighted | 12 | -0.016 | 0.024 | 4.973E-01 | 0.948 | cis | Hospitalized COVID-19 |
| 4979_34   | DERM                         | Dermatopontin                                                            | Q07507 | DPT       | chr1:168729206  | Inverse variance weighted | 6  | -0.020 | 0.030 | 4.974E-01 | 0.948 | cis | Hospitalized COVID-19 |
| 10907_116 | NTRI                         | Neurotrimin                                                              | Q9P121 | NTM       | chr11:131370478 | Inverse variance weighted | 2  | 0.090  | 0.132 | 4.974E-01 | 0.948 | cis | Hospitalized COVID-19 |
| 3292_75   | CD48                         | CD48 antigen                                                             | P09326 | CD48      | chr1:160711831  | Inverse variance weighted | 4  | 0.037  | 0.055 | 4.976E-01 | 0.948 | cis | Hospitalized COVID-19 |
| 3195_50   | Granulysin                   | Granulysin                                                               | P22749 | GNLY      | chr2:85685175   | Inverse variance weighted | 7  | -0.020 | 0.029 | 4.977E-01 | 0.948 | cis | Hospitalized COVID-19 |
| 3710_49   | Angiostatin                  | Angiostatin                                                              | P00747 | PLG       | chr6:160702194  | Inverse variance weighted | 7  | 0.038  | 0.056 | 4.981E-01 | 0.948 | cis | Hospitalized COVID-19 |
| 13242_134 | SHAN3                        | SH3 and multiple ankyrin repeat domains protein 3                        | Q9BY80 | SHANK3    | chr22:50674415  | Inverse variance weighted | 5  | -0.036 | 0.054 | 4.984E-01 | 0.948 | cis | Hospitalized COVID-19 |
| 6393_63   | Endoplasmin                  | Endoplasmin                                                              | P14625 | HSP90B1   | chr12:103930107 | Inverse variance weighted | 6  | -0.011 | 0.016 | 4.993E-01 | 0.948 | cis | Hospitalized COVID-19 |
| 5121_3    | SEM6B                        | Semaphorin-6B                                                            | Q9H3T3 | SEMA6B    | chr19:4581776   | Inverse variance weighted | 2  | 0.112  | 0.166 | 4.997E-01 | 0.948 | cis | Hospitalized COVID-19 |
| 9321_400  | NMB                          | Neuromedin-B                                                             | P08949 | NMB       | chr15:84658563  | Inverse variance weighted | 2  | -0.043 | 0.064 | 5.000E-01 | 0.948 | cis | Hospitalized COVID-19 |
| 10672_75  | SP-B                         | Pulmonary surfactant-associated protein B                                | P07988 | SFTPB     | chr2:85668741   | Inverse variance weighted | 4  | 0.055  | 0.082 | 5.002E-01 | 0.948 | cis | Hospitalized COVID-19 |
| 5648_28   | CTR82                        | Chymotrypsinogen B2                                                      | Q6GP11 | CTR82     | chr16:75207161  | Inverse variance weighted | 8  | -0.009 | 0.014 | 5.003E-01 | 0.948 | cis | Hospitalized COVID-19 |
| 9234_8    | TWSG1                        | Twisted gastrulation protein homolog 1                                   | Q9GZX9 | TWSG1     | chr18:9334767   | Inverse variance weighted | 3  | -0.055 | 0.081 | 5.010E-01 | 0.948 | cis | Hospitalized COVID-19 |
| 12436_84  | GST omega-1                  | Glutathione S-transferase omega-1                                        | P78417 | GSTO1     | chr10:104235356 | Inverse variance weighted | 9  | -0.014 | 0.021 | 5.029E-01 | 0.948 | cis | Hospitalized COVID-19 |
| 7928_183  | TPST1                        | Protein-tyrosine sulfotransferase 1                                      | O60507 | TPST1     | chr7:66205317   | Inverse variance weighted | 2  | 0.027  | 0.040 | 5.029E-01 | 0.948 | cis | Hospitalized COVID-19 |
| 17748_21  | QORX                         | Quinone oxidoreductase PIG3                                              | Q53FA7 | TPS3I3    | chr2:24085861   | Inverse variance weighted | 5  | -0.030 | 0.045 | 5.038E-01 | 0.948 | cis | Hospitalized COVID-19 |
| 17737_7   | IVD                          | Isovaleryl-CoA dehydrogenase, mitochondrial                              | P26440 | IVD       | chr15:40405485  | Inverse variance weighted | 2  | 0.048  | 0.073 | 5.041E-01 | 0.948 | cis | Hospitalized COVID-19 |
| 2658_27   | TrkC                         | NT-3 growth factor receptor                                              | Q16288 | NTRK3     | chr15:88256791  | Inverse variance weighted | 5  | -0.029 | 0.044 | 5.042E-01 | 0.948 | cis | Hospitalized COVID-19 |

|          |                                |                                                                            |        |          |                 |                           |    |        |       |           |       |     |                       |
|----------|--------------------------------|----------------------------------------------------------------------------|--------|----------|-----------------|---------------------------|----|--------|-------|-----------|-------|-----|-----------------------|
| 5646_20  | RNA56                          | Ribonuclease K6                                                            | Q93091 | RNA56    | chr14:20781268  | Inverse variance weighted | 8  | 0.013  | 0.020 | 5.050E-01 | 0.948 | cis | Hospitalized COVID-19 |
| 19558_10 | LRP4                           | Low-density lipoprotein receptor-related protein 4                         | O75096 | LRP4     | chr11:46918642  | Inverse variance weighted | 6  | 0.033  | 0.050 | 5.052E-01 | 0.948 | cis | Hospitalized COVID-19 |
| 3905_62  | UBE2N                          | Ubiquitin-conjugating enzyme E2 N                                          | P61088 | UBE2N    | chr12:93441947  | Wald ratio                | 1  | -0.150 | 0.226 | 5.062E-01 | 0.948 | cis | Hospitalized COVID-19 |
| 11356_19 | DGCA14                         | Protein DGCR14                                                             | Q960F8 | ESS2     | chr22:19144684  | Wald ratio                | 1  | 0.065  | 0.098 | 5.072E-01 | 0.948 | cis | Hospitalized COVID-19 |
| 6521_35  | NPTX2                          | Neuronal pentraxin-2                                                       | P47972 | NPTX2    | chr7:98617285   | Inverse variance weighted | 2  | -0.062 | 0.094 | 5.091E-01 | 0.948 | cis | Hospitalized COVID-19 |
| 8376_25  | LSHB                           | Lutropin subunit beta                                                      | P01229 | LHB      | chr19:49017091  | Inverse variance weighted | 4  | 0.033  | 0.050 | 5.093E-01 | 0.948 | cis | Hospitalized COVID-19 |
| 17410_5  | CETN3                          | Centrin-3                                                                  | O15182 | CETN3    | chr5:90409766   | Wald ratio                | 1  | -0.096 | 0.146 | 5.095E-01 | 0.948 | cis | Hospitalized COVID-19 |
| 18422_41 | ERG19                          | Diphosphomevalonate decarboxylase                                          | P53602 | MVD      | chr16:88663161  | Inverse variance weighted | 2  | 0.094  | 0.142 | 5.102E-01 | 0.948 | cis | Hospitalized COVID-19 |
| 19556_12 | Complement receptor type 1     | Complement receptor type 1                                                 | P17927 | CR1      | chr1:207496147  | Inverse variance weighted | 10 | -0.026 | 0.039 | 5.103E-01 | 0.948 | cis | Hospitalized COVID-19 |
| 4964_67  | ARTS1                          | Endoplasmic reticulum aminopeptidase 1                                     | Q9N208 | ERAP1    | chr5:96808100   | Inverse variance weighted | 5  | -0.014 | 0.021 | 5.115E-01 | 0.948 | cis | Hospitalized COVID-19 |
| 2212_69  | tPA                            | Tissue-type plasminogen activator                                          | P00750 | PLAT     | chr8:42207709   | Inverse variance weighted | 4  | 0.037  | 0.056 | 5.116E-01 | 0.948 | cis | Hospitalized COVID-19 |
| 10708_3  | GON2                           | Progonadoliberin-2                                                         | O43555 | GNRH2    | chr20:3043622   | Wald ratio                | 1  | -0.065 | 0.099 | 5.122E-01 | 0.948 | cis | Hospitalized COVID-19 |
| 17758_79 | DCXR                           | L-xylulose reductase                                                       | Q724W1 | DCXR     | chr17:82037709  | Inverse variance weighted | 2  | 0.070  | 0.106 | 5.127E-01 | 0.948 | cis | Hospitalized COVID-19 |
| 14106_46 | GDP/GTP exchange protein       | Rap1 GTPase-GDP dissociation stimulator 1                                  | P52306 | RAP1GDS1 | chr4:98261384   | Wald ratio                | 1  | -0.132 | 0.202 | 5.136E-01 | 0.948 | cis | Hospitalized COVID-19 |
| 17697_2  | OVCA2                          | Esterase OVCA2                                                             | Q8WZ82 | OVCA2    | chr17:2042022   | Wald ratio                | 1  | -0.073 | 0.113 | 5.160E-01 | 0.948 | cis | Hospitalized COVID-19 |
| 16890_37 | ATL1                           | ADAMTS-like protein 1                                                      | Q8N6G6 | ADAMTSL1 | chr9:17906563   | Inverse variance weighted | 6  | 0.030  | 0.047 | 5.163E-01 | 0.948 | cis | Hospitalized COVID-19 |
| 8778_3   | Noggin                         | Noggin                                                                     | Q13253 | NOG      | chr17:56593699  | Inverse variance weighted | 5  | 0.034  | 0.052 | 5.171E-01 | 0.948 | cis | Hospitalized COVID-19 |
| 2579_17  | MMP-9                          | Matrix metalloproteinase-9                                                 | P14780 | MMP9     | chr20:46008908  | Wald ratio                | 1  | -0.087 | 0.135 | 5.186E-01 | 0.948 | cis | Hospitalized COVID-19 |
| 2816_50  | BCAM                           | Basal Cell Adhesion Molecule                                               | P50895 | BCAM     | chr19:44809071  | Inverse variance weighted | 5  | 0.026  | 0.041 | 5.188E-01 | 0.948 | cis | Hospitalized COVID-19 |
| 3196_6   | HPLN1                          | Hyaluronan and proteoglycan link protein 1                                 | P10915 | HAPLN1   | chr5:83720855   | Inverse variance weighted | 3  | -0.049 | 0.076 | 5.198E-01 | 0.948 | cis | Hospitalized COVID-19 |
| 9525_1   | PTK7                           | Inactive tyrosine-protein kinase 7                                         | Q13308 | PTK7     | chr6:43076307   | Inverse variance weighted | 2  | 0.165  | 0.257 | 5.199E-01 | 0.948 | cis | Hospitalized COVID-19 |
| 9185_15  | TFF1                           | Trefoil factor 1                                                           | P04155 | TFF1     | chr21:42366535  | Inverse variance weighted | 3  | 0.024  | 0.037 | 5.208E-01 | 0.948 | cis | Hospitalized COVID-19 |
| 8299_66  | LIR4A                          | Leukocyte immunoglobulin-like receptor subfamily A member 4                | P59901 | LIR4A    | chr19:54339162  | Inverse variance weighted | 3  | -0.035 | 0.055 | 5.211E-01 | 0.948 | cis | Hospitalized COVID-19 |
| 16599_38 | GNP1                           | GNP-loop GTPase 1                                                          | Q9HCN4 | GNP1     | chr2:27628247   | Wald ratio                | 1  | 0.085  | 0.133 | 5.212E-01 | 0.948 | cis | Hospitalized COVID-19 |
| 11347_9  | Transaldolase                  | Transaldolase                                                              | P37837 | TALD01   | chr11:747415    | Inverse variance weighted | 2  | -0.064 | 0.099 | 5.215E-01 | 0.948 | cis | Hospitalized COVID-19 |
| 4133_54  | Granzyme B                     | Granzyme B                                                                 | P10144 | GZMB     | chr14:24634267  | Wald ratio                | 1  | 0.071  | 0.110 | 5.221E-01 | 0.948 | cis | Hospitalized COVID-19 |
| 9092_33  | ANG11:N-term                   | Angiotensin-related protein 1:N-term                                       | O95841 | ANGPTL1  | chr1:178871077  | Wald ratio                | 1  | 0.125  | 0.195 | 5.225E-01 | 0.948 | cis | Hospitalized COVID-19 |
| 13450_49 | UBP8                           | Ubiquitin carboxyl-terminal hydrolase 8                                    | P40818 | USP8     | chr15:50424380  | Wald ratio                | 1  | 0.080  | 0.125 | 5.226E-01 | 0.948 | cis | Hospitalized COVID-19 |
| 9838_4   | SMAD1                          | Mothers against decapentaplegic homolog 1                                  | Q15797 | SMAD1    | chr4:145481194  | Wald ratio                | 1  | -0.132 | 0.206 | 5.232E-01 | 0.948 | cis | Hospitalized COVID-19 |
| 15540_6  | Vimentin                       | Vimentin                                                                   | P08670 | VIM      | chr10:17228241  | Inverse variance weighted | 2  | 0.079  | 0.125 | 5.245E-01 | 0.948 | cis | Hospitalized COVID-19 |
| 15620_4  | NLGN1                          | Neuroigin-1                                                                | Q8N2Q7 | NLGN1    | chr3:173396284  | Inverse variance weighted | 3  | 0.097  | 0.153 | 5.253E-01 | 0.948 | cis | Hospitalized COVID-19 |
| 8773_172 | EMIL3:region 1                 | EMILIN-3:region 1                                                          | Q9NT22 | EMILIN3  | chr20:41366818  | Inverse variance weighted | 6  | -0.039 | 0.061 | 5.254E-01 | 0.948 | cis | Hospitalized COVID-19 |
| 13632_10 | Zyxin                          | Zyxin                                                                      | Q15942 | ZYX      | chr7:143381295  | Wald ratio                | 1  | -0.143 | 0.225 | 5.257E-01 | 0.948 | cis | Hospitalized COVID-19 |
| 9986_14  | Neuropeptide W                 | Neuropeptide W                                                             | Q8N729 | NPW      | chr16:2009926   | Inverse variance weighted | 3  | -0.027 | 0.042 | 5.258E-01 | 0.948 | cis | Hospitalized COVID-19 |
| 3481_87  | XPNPPEP1                       | Xaa-Pro aminopeptidase 1                                                   | Q9NQW7 | XPNPPEP1 | chr10:109923553 | Wald ratio                | 1  | 0.102  | 0.160 | 5.258E-01 | 0.948 | cis | Hospitalized COVID-19 |
| 10603_1  | HIS3                           | Histatin-3                                                                 | P15516 | HTN3     | chr4:70028455   | Inverse variance weighted | 3  | -0.051 | 0.081 | 5.258E-01 | 0.948 | cis | Hospitalized COVID-19 |
| 19115_13 | CMBL                           | Carboxymethylenebenzotolidase homolog                                      | Q960G6 | CMBL     | chr5:10307902   | Wald ratio                | 1  | 0.042  | 0.067 | 5.258E-01 | 0.948 | cis | Hospitalized COVID-19 |
| 8890_9   | T132B                          | Transmembrane protein 132B                                                 | Q140G7 | TMEM132B | chr12:125186386 | Inverse variance weighted | 2  | 0.040  | 0.064 | 5.265E-01 | 0.948 | cis | Hospitalized COVID-19 |
| 6383_90  | TL1                            | Tolloid-like protein 1                                                     | O43897 | TL1      | chr4:165873237  | Inverse variance weighted | 2  | -0.129 | 0.203 | 5.267E-01 | 0.948 | cis | Hospitalized COVID-19 |
| 8327_26  | DPEP2                          | Dipeptidase 2                                                              | Q9H4A9 | DPEP2    | chr16:68000586  | Inverse variance weighted | 2  | 0.066  | 0.104 | 5.270E-01 | 0.948 | cis | Hospitalized COVID-19 |
| 5355_69  | LIGHT                          | Tumor necrosis factor ligand superfamily member 14                         | O43557 | TNFSF14  | chr19:6670588   | Wald ratio                | 1  | -0.064 | 0.100 | 5.273E-01 | 0.948 | cis | Hospitalized COVID-19 |
| 4332_6   | CLC1B                          | C-type lectin domain family 1 member B                                     | Q9P126 | CLEC1B   | chr12:10013424  | Wald ratio                | 1  | -0.091 | 0.143 | 5.274E-01 | 0.948 | cis | Hospitalized COVID-19 |
| 13931_22 | PSMD9                          | 26S proteasome non-ATPase regulatory subunit 9                             | O00233 | PSMD9    | chr12:121888732 | Wald ratio                | 1  | 0.052  | 0.082 | 5.281E-01 | 0.948 | cis | Hospitalized COVID-19 |
| 12486_8  | GLRX2                          | Glutaredoxin-2, mitochondrial                                              | Q9NS18 | GLRX2    | chr1:193106114  | Inverse variance weighted | 3  | 0.033  | 0.053 | 5.297E-01 | 0.948 | cis | Hospitalized COVID-19 |
| 16074_12 | GRB2-related adapter protein 2 | GRB2-related adapter protein 2                                             | O75791 | GRAP2    | chr22:39901084  | Wald ratio                | 1  | -0.202 | 0.322 | 5.299E-01 | 0.948 | cis | Hospitalized COVID-19 |
| 9267_2   | CBPA4                          | Carboxypeptidase A4                                                        | Q9UI42 | CPA4     | chr7:130293134  | Inverse variance weighted | 12 | -0.008 | 0.012 | 5.299E-01 | 0.948 | cis | Hospitalized COVID-19 |
| 13481_24 | TCEA2                          | Transcription elongation factor A protein 2                                | Q15560 | TCEA2    | chr20:64049836  | Wald ratio                | 1  | 0.044  | 0.071 | 5.300E-01 | 0.948 | cis | Hospitalized COVID-19 |
| 6077_63  | CECR1                          | Adenosine deaminase CECR1                                                  | Q9NZK5 | ADA2     | chr22:17258235  | Inverse variance weighted | 5  | 0.016  | 0.025 | 5.303E-01 | 0.948 | cis | Hospitalized COVID-19 |
| 15514_26 | Pseudocholinesterase           | Cholinesterase                                                             | P06276 | BCHC     | chr3:165837462  | Inverse variance weighted | 6  | 0.016  | 0.026 | 5.303E-01 | 0.948 | cis | Hospitalized COVID-19 |
| 17686_27 | TBCB                           | Tubulin-folding cofactor B                                                 | O99426 | TBCB     | chr19:36114289  | Wald ratio                | 1  | 0.104  | 0.166 | 5.309E-01 | 0.948 | cis | Hospitalized COVID-19 |
| 5620_13  | AMD                            | Peptidyl-glycine alpha-amidating monooxygenase                             | P19021 | PAM      | chr5:102753981  | Inverse variance weighted | 10 | -0.012 | 0.020 | 5.317E-01 | 0.948 | cis | Hospitalized COVID-19 |
| 13642_90 | CIG49                          | Interferon-induced protein with tetratricopeptide repeats 3                | O14879 | IFIT3    | chr10:89327307  | Wald ratio                | 1  | 0.076  | 0.122 | 5.319E-01 | 0.948 | cis | Hospitalized COVID-19 |
| 12573_80 | TRIM3                          | Tripartite motif-containing protein 3                                      | O75382 | TRIM3    | chr11:6474459   | Wald ratio                | 1  | 0.064  | 0.103 | 5.332E-01 | 0.948 | cis | Hospitalized COVID-19 |
| 11265_8  | Retinal dehydrogenase 1        | Retinal dehydrogenase 1                                                    | P00352 | ALDH1A1  | chr9:73080442   | Wald ratio                | 1  | -0.073 | 0.118 | 5.338E-01 | 0.948 | cis | Hospitalized COVID-19 |
| 4771_10  | ASM3A                          | Acid sphingomyelinase-like phosphodiesterase 3a                            | Q92484 | SMPDL3A  | chr6:122789049  | Inverse variance weighted | 3  | 0.028  | 0.045 | 5.341E-01 | 0.948 | cis | Hospitalized COVID-19 |
| 3298_52  | Contactin-4                    | Contactin-4                                                                | Q8IWW2 | CNTN4    | chr3:2098813    | Inverse variance weighted | 8  | 0.018  | 0.029 | 5.346E-01 | 0.948 | cis | Hospitalized COVID-19 |
| 5593_11  | PDIA5                          | Protein disulfide-isomerase A5                                             | Q14554 | PDIA5    | chr3:123067025  | Inverse variance weighted | 8  | -0.012 | 0.019 | 5.347E-01 | 0.948 | cis | Hospitalized COVID-19 |
| 4152_58  | Prekallikrein                  | Plasma kallikrein                                                          | P03952 | KLK81    | chr4:186226438  | Inverse variance weighted | 4  | 0.027  | 0.043 | 5.355E-01 | 0.948 | cis | Hospitalized COVID-19 |
| 12684_5  | ADSV                           | Adseverin                                                                  | Q9Y6Y3 | SCIN     | chr7:12570577   | Wald ratio                | 1  | -0.080 | 0.130 | 5.357E-01 | 0.948 | cis | Hospitalized COVID-19 |
| 9212_22  | CATF                           | Cathepsin F                                                                | Q9UBX1 | CTSF     | chr11:66568879  | Inverse variance weighted | 2  | -0.039 | 0.063 | 5.362E-01 | 0.948 | cis | Hospitalized COVID-19 |
| 2652_15  | suPAR                          | Urokinase plasminogen activator surface receptor                           | Q03405 | PLAUR    | chr19:43670547  | Inverse variance weighted | 2  | -0.083 | 0.134 | 5.363E-01 | 0.948 | cis | Hospitalized COVID-19 |
| 5103_30  | MO2R1:ECD                      | Cell surface glycoprotein CD200 receptor 1:Isoform 4, Extracellular Domain | Q8TD46 | CD200R1  | chr3:112975103  | Wald ratio                | 1  | 0.057  | 0.092 | 5.363E-01 | 0.948 | cis | Hospitalized COVID-19 |
| 15556_49 | Alpha-amylase 2B               | Alpha-amylase 2B                                                           | P19961 | AMY2B    | chr1:103553815  | Inverse variance weighted | 4  | 0.073  | 0.118 | 5.371E-01 | 0.948 | cis | Hospitalized COVID-19 |
| 2979_8   | ENA-78                         | C-X-C motif chemokine 5                                                    | P42830 | CXCL5    | chr4:73998677   | Wald ratio                | 1  | -0.176 | 0.286 | 5.376E-01 | 0.948 | cis | Hospitalized COVID-19 |
| 5465_32  | H6ST1                          | Heparan-sulfate 6-O-sulfotransferase 1                                     | O60243 | H6ST1    | chr2:128318868  | Inverse variance weighted | 2  | 0.039  | 0.063 | 5.383E-01 | 0.948 | cis | Hospitalized COVID-19 |
| 5601_2   | PGRP-L                         | N-acetylmuramoyl-L-alanine amidase                                         | Q96PD5 | PGLYRP2  | chr19:15498956  | Inverse variance weighted | 5  | -0.024 | 0.038 | 5.389E-01 | 0.948 | cis | Hospitalized COVID-19 |
| 3825_18  | MK08                           | Mitogen-activated protein kinase 8                                         | P45983 | MAPK8    | chr10:48306639  | Wald ratio                | 1  | -0.112 | 0.183 | 5.399E-01 | 0.948 | cis | Hospitalized COVID-19 |
| 18435_40 | UBX2B                          | UBX domain-containing protein 2B                                           | Q14CS0 | UBXN2B   | chr8:58411359   | Wald ratio                | 1  | -0.106 | 0.174 | 5.404E-01 | 0.948 | cis | Hospitalized COVID-19 |
| 8231_122 | VEGF sR1                       | Vascular endothelial growth factor receptor 1                              | P17948 | FLT1     | chr13:28495145  | Wald ratio                | 1  | 0.120  | 0.196 | 5.405E-01 | 0.948 | cis | Hospitalized COVID-19 |
| 15506_34 | LRP12                          | Low-density lipoprotein receptor-related protein 12                        | Q9Y561 | LRP12    | chr8:104589258  | Inverse variance weighted | 2  | 0.100  | 0.163 | 5.407E-01 | 0.948 | cis | Hospitalized COVID-19 |
| 16035_8  | VEGF sR3                       | Vascular endothelial growth factor receptor 3                              | P35916 | FLT4     | chr5:180649624  | Inverse variance weighted | 3  | 0.045  | 0.074 | 5.412E-01 | 0.948 | cis | Hospitalized COVID-19 |
| 15476_6  | REG3G                          | Regenerating islet-derived protein 3-gamma                                 | Q6UW15 | REG3G    | chr2:79025686   | Inverse variance weighted | 6  | 0.016  | 0.026 | 5.419E-01 | 0.948 | cis | Hospitalized COVID-19 |
| 5837_49  | LIF sR                         | Leukemia inhibitory factor receptor                                        | P42702 | LIFR     | chr5:38608354   | Inverse variance weighted | 4  | 0.038  | 0.062 | 5.421E-01 | 0.948 | cis | Hospitalized COVID-19 |
| 8245_27  | sICAM-5                        | Intercellular adhesion molecule 5                                          | Q9UMF0 | ICAM5    | chr19:10289952  | Inverse variance weighted | 3  | 0.068  | 0.111 | 5.424E-01 | 0.948 | cis | Hospitalized COVID-19 |
| 14079_14 | IL-18 Ra                       | Interleukin-18 receptor 1                                                  | Q13481 | IL18R1   | chr2:102311529  | Inverse variance weighted | 5  | -0.038 | 0.062 | 5.431E-01 | 0.948 | cis | Hospitalized COVID-19 |
| 2278_61  | TIMP-2                         | Metalloproteinase inhibitor 2                                              | P16035 | TIMP2    | chr17:78925387  | Wald ratio                | 1  | -0.089 | 0.147 | 5.433E-01 | 0.948 | cis | Hospitalized COVID-19 |
| 18864_7  | TRY3                           | Trypsin-3                                                                  | P35030 | PRSS3    | chr9:33750679   | Inverse variance weighted | 4  | 0.016  | 0.026 | 5.439E-01 | 0.948 | cis | Hospitalized COVID-19 |
| 3799_11  | Carbonic anhydrase III         | Carbonic anhydrase 3                                                       | P07451 | CA3      | chr8:85373436   | Inverse variance weighted | 4  | 0.051  | 0.084 | 5.457E-01 | 0.948 | cis | Hospitalized COVID-19 |

|           |                                 |                                                                        |        |          |                 |                           |    |        |       |           |       |     |                       |
|-----------|---------------------------------|------------------------------------------------------------------------|--------|----------|-----------------|---------------------------|----|--------|-------|-----------|-------|-----|-----------------------|
| 11161_5   | SPG20                           | Spartin                                                                | Q8N0X7 | SPART    | chr13:36370180  | Wald ratio                | 1  | 0.132  | 0.219 | 5.467E-01 | 0.948 | cis | Hospitalized COVID-19 |
| 3459_49   | PDGF Rb                         | Platelet-derived growth factor receptor beta                           | P09619 | PDGFRB   | chr5:150155872  | Inverse variance weighted | 11 | -0.007 | 0.011 | 5.476E-01 | 0.948 | cis | Hospitalized COVID-19 |
| 2944_66   | DAN                             | Neuroblastoma suppressor of tumorigenicity 1                           | P41271 | NBL1     | chr1:19596979   | Wald ratio                | 1  | 0.128  | 0.212 | 5.482E-01 | 0.948 | cis | Hospitalized COVID-19 |
| 2644_11   | PKC-A                           | Protein kinase C alpha type                                            | P12752 | PRKCA    | chr17:66302613  | Wald ratio                | 1  | -0.139 | 0.232 | 5.488E-01 | 0.948 | cis | Hospitalized COVID-19 |
| 16918_198 | TLR3                            | Toll-like receptor 3                                                   | O15455 | TLR3     | chr4:186068911  | Inverse variance weighted | 8  | 0.015  | 0.025 | 5.492E-01 | 0.948 | cis | Hospitalized COVID-19 |
| 15375_49  | Carboxypeptidase B1             | Carboxypeptidase B                                                     | P15086 | CPB1     | chr3:148791102  | Inverse variance weighted | 2  | 0.028  | 0.048 | 5.512E-01 | 0.948 | cis | Hospitalized COVID-19 |
| 13118_5   | SMOC1                           | SPARC-related modular calcium-binding protein 1                        | Q9H4F8 | SMOC1    | chr14:69854131  | Inverse variance weighted | 3  | 0.030  | 0.050 | 5.515E-01 | 0.948 | cis | Hospitalized COVID-19 |
| 17435_43  | ETFA                            | Electron transfer flavoprotein subunit alpha, mitochondrial            | P13804 | ETFA     | chr15:76311730  | Wald ratio                | 1  | -0.118 | 0.198 | 5.517E-01 | 0.948 | cis | Hospitalized COVID-19 |
| 10974_20  | ISK7                            | Serine protease inhibitor Kazal-type 7                                 | P58062 | SPINK7   | chr5:148312419  | Wald ratio                | 1  | -0.052 | 0.087 | 5.517E-01 | 0.948 | cis | Hospitalized COVID-19 |
| 11208_15  | NAGPA                           | N-acetylglucosamine-1-phosphodiester alpha-N-acetylglucosaminidase     | Q9UK23 | NAGPA    | chr16:5034141   | Inverse variance weighted | 7  | 0.015  | 0.025 | 5.534E-01 | 0.948 | cis | Hospitalized COVID-19 |
| 11219_95  | FGFP3                           | Fibroblast growth factor-binding protein 3                             | Q8TAT2 | FGFBP3   | chr10:91909486  | Inverse variance weighted | 3  | 0.025  | 0.041 | 5.535E-01 | 0.948 | cis | Hospitalized COVID-19 |
| 5463_22   | GAS1                            | Growth arrest-specific protein 1                                       | P54826 | GAS1     | chr9:86947506   | Inverse variance weighted | 2  | 0.054  | 0.091 | 5.549E-01 | 0.948 | cis | Hospitalized COVID-19 |
| 5112_73   | OX2G                            | OX-2 membrane glycoprotein                                             | P41217 | CD200    | chr3:112332347  | Wald ratio                | 1  | -0.076 | 0.129 | 5.554E-01 | 0.948 | cis | Hospitalized COVID-19 |
| 5708_1    | LEAP2                           | Liver-expressed antimicrobial peptide 2                                | Q969E1 | LEAP2    | chr5:132873444  | Inverse variance weighted | 5  | 0.018  | 0.031 | 5.557E-01 | 0.948 | cis | Hospitalized COVID-19 |
| 12422_143 | LX15B                           | Arachidonate 15-lipoxygenase B                                         | O15296 | ALOX15B  | chr17:8039034   | Wald ratio                | 1  | 0.083  | 0.140 | 5.560E-01 | 0.948 | cis | Hospitalized COVID-19 |
| 3311_27   | FCG3B                           | Low affinity immunoglobulin gamma Fc region receptor III-B             | O75015 | FCGR3B   | chr1:161631963  | Wald ratio                | 1  | -0.133 | 0.226 | 5.564E-01 | 0.948 | cis | Hospitalized COVID-19 |
| 11377_19  | ADH7                            | Alcohol dehydrogenase class 4 mu/sigma chain                           | P40394 | ADH7     | chr4:99435510   | Inverse variance weighted | 3  | -0.021 | 0.035 | 5.568E-01 | 0.948 | cis | Hospitalized COVID-19 |
| 17777_31  | SDSL                            | Serine dehydratase-like                                                | Q96GA7 | SDSL     | chr12:113422380 | Inverse variance weighted | 6  | 0.022  | 0.037 | 5.569E-01 | 0.948 | cis | Hospitalized COVID-19 |
| 5618_50   | FAM3B                           | Protein FAM3B                                                          | P58499 | FAM3B    | chr21:41304212  | Wald ratio                | 1  | 0.080  | 0.136 | 5.578E-01 | 0.948 | cis | Hospitalized COVID-19 |
| 2474_54   | SAP                             | Serum amyloid P-component                                              | P02743 | APCS     | chr1:159587826  | Inverse variance weighted | 3  | 0.030  | 0.051 | 5.587E-01 | 0.948 | cis | Hospitalized COVID-19 |
| 9360_33   | EDIL3                           | EGF-like repeat and discoidin I-like domain-containing protein 3       | O43854 | EDIL3    | chr5:84384880   | Inverse variance weighted | 2  | 0.075  | 0.127 | 5.588E-01 | 0.948 | cis | Hospitalized COVID-19 |
| 3305_6    | DL14                            | Delta-like protein 4                                                   | Q9NR61 | DL14     | chr15:40929340  | Wald ratio                | 1  | 0.114  | 0.195 | 5.609E-01 | 0.948 | cis | Hospitalized COVID-19 |
| 13122_19  | FLRT2                           | Leucine-rich repeat transmembrane protein FLRT2                        | O43155 | FLRT2    | chr14:85530144  | Inverse variance weighted | 5  | 0.021  | 0.035 | 5.619E-01 | 0.948 | cis | Hospitalized COVID-19 |
| 13109_82  | NEGR1                           | Neuronal growth regulator 1                                            | Q7Z381 | NEGR1    | chr1:72282539   | Wald ratio                | 1  | -0.093 | 0.160 | 5.621E-01 | 0.948 | cis | Hospitalized COVID-19 |
| 3175_51   | AT5313                          | A disintegrin and metalloproteinase with thrombospondin motifs 13      | Q76LX8 | ADAMTS13 | chr9:133414358  | Inverse variance weighted | 7  | -0.013 | 0.023 | 5.623E-01 | 0.948 | cis | Hospitalized COVID-19 |
| 13068_139 | CCS                             | Copper chaperone for superoxide dismutase                              | O14618 | CCS      | chr11:66593153  | Wald ratio                | 1  | 0.049  | 0.084 | 5.638E-01 | 0.948 | cis | Hospitalized COVID-19 |
| 10451_11  | NUCB1                           | Nucleobindin-1                                                         | Q02818 | NUCB1    | chr19:48900050  | Inverse variance weighted | 3  | -0.033 | 0.057 | 5.639E-01 | 0.948 | cis | Hospitalized COVID-19 |
| 9015_1    | PRG3                            | Proteoglycan 3                                                         | Q9Y2Y8 | PRG3     | chr11:57381150  | Wald ratio                | 1  | -0.165 | 0.286 | 5.640E-01 | 0.948 | cis | Hospitalized COVID-19 |
| 3332_57   | RGM-C                           | Hemojuvelin                                                            | Q6ZVN8 | HJV      | chr1:146036746  | Wald ratio                | 1  | -0.096 | 0.167 | 5.643E-01 | 0.948 | cis | Hospitalized COVID-19 |
| 2946_52   | Factor D                        | Complement factor D                                                    | P00746 | CFD      | chr19:859453    | Inverse variance weighted | 6  | 0.028  | 0.048 | 5.649E-01 | 0.948 | cis | Hospitalized COVID-19 |
| 17370_186 | ABHDA                           | Mycophenolic acid acyl-glucuronide esterase, mitochondrial             | Q9NUJ1 | ABHD10   | chr3:111979010  | Wald ratio                | 1  | -0.114 | 0.198 | 5.649E-01 | 0.948 | cis | Hospitalized COVID-19 |
| 16307_22  | UNC5H4                          | Netrin receptor UNC5D                                                  | Q6UX24 | UNC5D    | chr8:35235475   | Inverse variance weighted | 3  | 0.043  | 0.075 | 5.650E-01 | 0.948 | cis | Hospitalized COVID-19 |
| 7997_118  | DOC2B                           | Double C2-like domain-containing protein beta                          | Q14184 | DOC2B    | chr17:181650    | Wald ratio                | 1  | 0.139  | 0.241 | 5.655E-01 | 0.948 | cis | Hospitalized COVID-19 |
| 17782_23  | THIK                            | 3-ketoacyl-CoA thiolase, peroxisomal                                   | P09110 | ACAA1    | chr3:38137242   | Inverse variance weighted | 5  | 0.025  | 0.043 | 5.664E-01 | 0.948 | cis | Hospitalized COVID-19 |
| 18386_36  | GLRX1                           | Glutaredoxin-1                                                         | P35754 | GLRX     | chr5:95822726   | Wald ratio                | 1  | -0.108 | 0.189 | 5.665E-01 | 0.948 | cis | Hospitalized COVID-19 |
| 10940_25  | SRCA                            | Sarcalumenin                                                           | Q86TD4 | SRL      | chr16:4242080   | Wald ratio                | 1  | 0.088  | 0.153 | 5.665E-01 | 0.948 | cis | Hospitalized COVID-19 |
| 13123_3   | FLRT3:ECD                       | Leucine-rich repeat transmembrane protein FLRT3:Extracellular domain   | Q9NZU0 | FLRT3    | chr20:14337614  | Inverse variance weighted | 6  | -0.010 | 0.018 | 5.669E-01 | 0.948 | cis | Hospitalized COVID-19 |
| 15447_45  | Sorbitol dehydrogenase          | Sorbitol dehydrogenase                                                 | Q00796 | SORD     | chr15:45023147  | Inverse variance weighted | 4  | 0.027  | 0.047 | 5.671E-01 | 0.948 | cis | Hospitalized COVID-19 |
| 3622_33   | LGMN                            | Legumain                                                               | Q95338 | LGMN     | chr14:92748679  | Inverse variance weighted | 3  | 0.036  | 0.064 | 5.674E-01 | 0.948 | cis | Hospitalized COVID-19 |
| 19136_22  | MM5A                            | Methylmalonate-semialdehyde dehydrogenase [acylating], mitochondrial   | Q02252 | ALDH6A1  | chr14:74084492  | Inverse variance weighted | 2  | 0.074  | 0.130 | 5.683E-01 | 0.948 | cis | Hospitalized COVID-19 |
| 18398_1   | AK1D1                           | 3-oxo-5-beta-steroid 4-dehydrogenase                                   | P51857 | AKR1D1   | chr7:138002324  | Wald ratio                | 1  | -0.120 | 0.211 | 5.690E-01 | 0.948 | cis | Hospitalized COVID-19 |
| 11098_1   | PDXK                            | Pyridoxal kinase                                                       | O00764 | PDXK     | chr21:43719094  | Inverse variance weighted | 6  | -0.035 | 0.061 | 5.698E-01 | 0.948 | cis | Hospitalized COVID-19 |
| 19347_37  | Carbonic Anhydrase XII          | Carbonic anhydrase 12                                                  | O43570 | CA12     | chr15:63381846  | Wald ratio                | 1  | 0.135  | 0.238 | 5.703E-01 | 0.948 | cis | Hospitalized COVID-19 |
| 7050_5    | NEGR1                           | Neuronal growth regulator 1                                            | Q7Z381 | NEGR1    | chr1:72282539   | Wald ratio                | 1  | 0.130  | 0.230 | 5.709E-01 | 0.948 | cis | Hospitalized COVID-19 |
| 3283_21   | BGH3                            | Transforming growth factor-beta-induced protein ig-h3                  | Q15582 | TGFB1    | chr5:136028988  | Inverse variance weighted | 5  | -0.016 | 0.027 | 5.712E-01 | 0.948 | cis | Hospitalized COVID-19 |
| 18397_5   | AK1C4                           | Aldo-keto reductase family 1 member C4                                 | P17516 | AKR1C4   | chr10:15195462  | Inverse variance weighted | 8  | 0.018  | 0.032 | 5.721E-01 | 0.948 | cis | Hospitalized COVID-19 |
| 3495_15   | GCP-2                           | C-X-C motif chemokine 6                                                | P80162 | CXCL6    | chr4:73836640   | Inverse variance weighted | 6  | -0.034 | 0.061 | 5.725E-01 | 0.948 | cis | Hospitalized COVID-19 |
| 3310_62   | FCG2B                           | Low affinity immunoglobulin gamma Fc region receptor II-b              | P31994 | FCGR2B   | chr1:161663143  | Inverse variance weighted | 12 | 0.026  | 0.046 | 5.725E-01 | 0.948 | cis | Hospitalized COVID-19 |
| 4437_56   | ENTP5                           | Ectonucleoside triphosphate diphosphohydrolase 5                       | O75356 | ENTP5    | chr14:74019399  | Inverse variance weighted | 8  | -0.014 | 0.025 | 5.736E-01 | 0.948 | cis | Hospitalized COVID-19 |
| 6472_40   | GP100                           | Melanocyte protein PMEL                                                | P40967 | PMEL     | chr12:55973317  | Inverse variance weighted | 2  | 0.027  | 0.048 | 5.741E-01 | 0.948 | cis | Hospitalized COVID-19 |
| 15565_102 | CA125                           | Mucin-16                                                               | Q8WU17 | MUC16    | chr19:8981342   | Inverse variance weighted | 2  | -0.041 | 0.074 | 5.746E-01 | 0.948 | cis | Hospitalized COVID-19 |
| 3519_3    | TARC                            | C-C motif chemokine 17                                                 | Q92583 | CCL17    | chr16:57404767  | Inverse variance weighted | 2  | -0.031 | 0.055 | 5.749E-01 | 0.948 | cis | Hospitalized COVID-19 |
| 9231_23   | IMPA3                           | Inositol monophosphatase 3                                             | Q9NX62 | BPNT2    | chr8:56993867   | Inverse variance weighted | 6  | 0.016  | 0.029 | 5.751E-01 | 0.948 | cis | Hospitalized COVID-19 |
| 3396_54   | Renin                           | Renin                                                                  | P00797 | REN      | chr1:204190324  | Inverse variance weighted | 3  | -0.065 | 0.116 | 5.766E-01 | 0.948 | cis | Hospitalized COVID-19 |
| 5727_35   | B3GLT                           | Beta-1,3-glucosyltransferase                                           | Q6Y288 | B3GLCT   | chr13:31199975  | Inverse variance weighted | 2  | 0.029  | 0.053 | 5.768E-01 | 0.948 | cis | Hospitalized COVID-19 |
| 8874_53   | CLN5:LD                         | Ceroid-lipofuscinosis neuronal protein 5:Lumenal domain                | O75503 | CLN5     | chr13:76990660  | Wald ratio                | 1  | -0.059 | 0.106 | 5.769E-01 | 0.948 | cis | Hospitalized COVID-19 |
| 12399_194 | CCD50                           | Coiled-coil domain-containing protein 50                               | Q8IVM0 | CCD50    | chr3:191329085  | Wald ratio                | 1  | -0.118 | 0.212 | 5.770E-01 | 0.948 | cis | Hospitalized COVID-19 |
| 9017_58   | LPH                             | Lactase-phlorizin hydrolase                                            | P09848 | LCT      | chr2:135837184  | Inverse variance weighted | 4  | -0.013 | 0.024 | 5.777E-01 | 0.948 | cis | Hospitalized COVID-19 |
| 3235_50   | WFKN2                           | WAP, Kazal, immunoglobulin, Kunitz and NTR domain-containing protein 2 | Q8TEU8 | WFIKN2   | chr17:50834650  | Inverse variance weighted | 7  | -0.015 | 0.027 | 5.787E-01 | 0.948 | cis | Hospitalized COVID-19 |
| 18315_38  | RTP4                            | Receptor-transporting protein 4                                        | Q96D08 | RTPK4    | chr3:187368385  | Inverse variance weighted | 3  | 0.017  | 0.030 | 5.798E-01 | 0.948 | cis | Hospitalized COVID-19 |
| 5036_50   | TSG-6                           | Tumor necrosis factor-inducible gene 6 protein                         | P98066 | TNFAIP6  | chr2:151357592  | Inverse variance weighted | 9  | -0.013 | 0.023 | 5.799E-01 | 0.948 | cis | Hospitalized COVID-19 |
| 3484_60   | Angiotensinogen                 | Angiotensinogen                                                        | P01019 | AGT      | chr1:230745576  | Inverse variance weighted | 2  | -0.039 | 0.071 | 5.815E-01 | 0.948 | cis | Hospitalized COVID-19 |
| 8909_77   | GNP11                           | Glucosamine-6-phosphate isomerase 1                                    | P46926 | GNPD01   | chr5:142013041  | Wald ratio                | 1  | 0.045  | 0.081 | 5.816E-01 | 0.948 | cis | Hospitalized COVID-19 |
| 19129_15  | MTHFSO                          | Methylenetetrahydrofolate synthase domain-containing protein           | Q2M296 | MTHFSO   | chr16:86555235  | Inverse variance weighted | 4  | -0.026 | 0.047 | 5.826E-01 | 0.948 | cis | Hospitalized COVID-19 |
| 6496_60   | DLK1:ECD                        | Protein delta homolog 1:Extracellular domain                           | P80370 | DLK1     | chr14:100725705 | Inverse variance weighted | 2  | 0.148  | 0.269 | 5.827E-01 | 0.948 | cis | Hospitalized COVID-19 |
| 2687_2    | MIA                             | Melanoma-derived growth regulatory protein                             | Q16674 | MIA      | chr19:40771648  | Inverse variance weighted | 7  | -0.015 | 0.027 | 5.833E-01 | 0.948 | cis | Hospitalized COVID-19 |
| 6580_29   | Pregnancy zone protein          | Pregnancy zone protein                                                 | P20742 | P2P      | chr12:9208395   | Inverse variance weighted | 2  | 0.045  | 0.082 | 5.842E-01 | 0.948 | cis | Hospitalized COVID-19 |
| 5475_10   | PKC-B-II                        | Protein kinase C beta type (splice variant beta-II)                    | P05771 | PRKCB    | chr16:23835983  | Wald ratio                | 1  | -0.074 | 0.135 | 5.846E-01 | 0.948 | cis | Hospitalized COVID-19 |
| 11480_1   | Aldehyde dehydrogenase, class 3 | Aldehyde dehydrogenase, dimeric NADP-preferring                        | P30838 | ALDH3A1  | chr17:19748943  | Wald ratio                | 1  | -0.047 | 0.085 | 5.852E-01 | 0.948 | cis | Hospitalized COVID-19 |
| 3420_21   | Carbonic anhydrase XIII         | Carbonic anhydrase 13                                                  | Q8N1Q1 | CA13     | chr8:85220587   | Inverse variance weighted | 3  | -0.018 | 0.033 | 5.860E-01 | 0.948 | cis | Hospitalized COVID-19 |
| 4145_58   | Neurotrophin-3                  | Neurotrophin-3                                                         | P20783 | NTF3     | chr12:5432108   | Inverse variance weighted | 2  | -0.158 | 0.291 | 5.861E-01 | 0.948 | cis | Hospitalized COVID-19 |
| 15368_3   | BMPER                           | BMP-binding endothelial regulator protein                              | Q8N8U9 | BMPER    | chr7:33904308   | Inverse variance weighted | 3  | -0.037 | 0.068 | 5.869E-01 | 0.948 | cis | Hospitalized COVID-19 |
| 18222_34  | SHLB2                           | Endophilin-B2                                                          | Q9NR46 | SH3GLB2  | chr9:129028331  | Inverse variance weighted | 3  | 0.017  | 0.031 | 5.870E-01 | 0.948 | cis | Hospitalized COVID-19 |
| 6402_8    | PILRA isoform FDF03-deltaTM     | Paired immunoglobulin-like type 2 receptor alpha isoform FDF03-deltaTM | Q9UK11 | PILRA    | chr7:100367530  | Inverse variance weighted | 2  | 0.019  | 0.035 | 5.871E-01 | 0.948 | cis | Hospitalized COVID-19 |
| 9816_37   | ISOC1                           | Isochorismatase domain-containing protein 1                            | Q96CN7 | ISOC1    | chr5:129094749  | Inverse variance weighted | 2  | -0.032 | 0.059 | 5.873E-01 | 0.948 | cis | Hospitalized COVID-19 |
| 3890_8    | LDH-H 1                         | L-lactate dehydrogenase B chain                                        | P07195 | LDHB     | chr12:21757857  | Wald ratio                | 1  | 0.153  | 0.282 | 5.874E-01 | 0.948 | cis | Hospitalized COVID-19 |
| 7628_40   | CREL1                           | Cysteine-rich with EGF-like domain protein 1                           | Q96HD1 | CRELD1   | chr3:9933793    | Inverse variance weighted | 12 | 0.012  | 0.022 | 5.875E-01 | 0.948 | cis | Hospitalized COVID-19 |
| 11308_8   | CR3L3                           | Cyclic AMP-responsive element-binding protein 3-like protein 4         | Q8TEY5 | CREB3L4  | chr1:153967534  | Inverse variance weighted | 2  | 0.058  | 0.108 | 5.877E-01 | 0.948 | cis | Hospitalized COVID-19 |

|           |                                   |                                                                                            |         |           |                 |                           |    |        |       |           |       |     |                       |
|-----------|-----------------------------------|--------------------------------------------------------------------------------------------|---------|-----------|-----------------|---------------------------|----|--------|-------|-----------|-------|-----|-----------------------|
| 11214_40  | DNJB9                             | DnaJ homolog subfamily 8 member 9                                                          | Q9UB53  | DNAJB9    | chr7:108569867  | Wald ratio                | 1  | 0.119  | 0.219 | 5.878E-01 | 0.948 | cis | Hospitalized COVID-19 |
| 5644_60   | RNA54                             | Ribonuclease 4                                                                             | P34096  | RNA54     | chr14:20684560  | Inverse variance weighted | 5  | -0.024 | 0.045 | 5.879E-01 | 0.948 | cis | Hospitalized COVID-19 |
| 10075_75  | ACB06                             | Acyl-CoA-binding domain-containing protein 6                                               | Q9BR61  | ACB06     | chr1:180502954  | Wald ratio                | 1  | 0.109  | 0.201 | 5.884E-01 | 0.948 | cis | Hospitalized COVID-19 |
| 8065_245  | PAT4E                             | Prostate and testis expressed protein 4                                                    | POC8F1  | PAT4E     | chr11:125833316 | Wald ratio                | 1  | -0.044 | 0.082 | 5.887E-01 | 0.948 | cis | Hospitalized COVID-19 |
| 11140_56  | CO1A1:C-term propeptide           | Collagen alpha-1(I) chain:C-term propeptide                                                | P02452  | COL1A1    | chr17:50201632  | Inverse variance weighted | 3  | -0.033 | 0.062 | 5.906E-01 | 0.949 | cis | Hospitalized COVID-19 |
| 13102_1   | FAM3D                             | Protein FAM3D                                                                              | Q96BQ1  | FAM3D     | chr3:58666834   | Inverse variance weighted | 4  | -0.020 | 0.037 | 5.916E-01 | 0.949 | cis | Hospitalized COVID-19 |
| 5581_28   | FGL1                              | Fibrinogen-like protein 1                                                                  | Q08830  | FGL1      | chr8:17910365   | Inverse variance weighted | 7  | 0.012  | 0.022 | 5.918E-01 | 0.949 | cis | Hospitalized COVID-19 |
| 12333_87  | RP1A                              | Ribose-5-phosphate isomerase                                                               | P49247  | RP1A      | chr2:88691673   | Inverse variance weighted | 2  | -0.039 | 0.073 | 5.919E-01 | 0.949 | cis | Hospitalized COVID-19 |
| 16914_104 | sCD14                             | Monocyte differentiation antigen CD14, soluble                                             | P08571  | CD14      | chr5:140633700  | Inverse variance weighted | 4  | -0.046 | 0.087 | 5.923E-01 | 0.949 | cis | Hospitalized COVID-19 |
| 8900_28   | NEO1                              | Neogenin                                                                                   | Q92859  | NEO1      | chr15:73051710  | Inverse variance weighted | 3  | -0.047 | 0.088 | 5.926E-01 | 0.949 | cis | Hospitalized COVID-19 |
| 6467_65   | KTEL1                             | Protein O-glucosyltransferase 1                                                            | Q8NB11  | POGLUT1   | chr3:119468963  | Inverse variance weighted | 3  | -0.031 | 0.058 | 5.934E-01 | 0.949 | cis | Hospitalized COVID-19 |
| 16610_13  | LRP10                             | Low-density lipoprotein receptor-related protein 10                                        | Q724F1  | LRP10     | chr14:22871740  | Inverse variance weighted | 3  | 0.061  | 0.115 | 5.943E-01 | 0.949 | cis | Hospitalized COVID-19 |
| 16296_43  | LGR5                              | Leucine-rich repeat-containing G-protein coupled receptor 5                                | Q75473  | LGR5      | chr12:71439798  | Wald ratio                | 1  | -0.097 | 0.183 | 5.945E-01 | 0.949 | cis | Hospitalized COVID-19 |
| 9950_229  | LAG-3                             | Lymphocyte activation gene 3 protein                                                       | P18627  | LAG3      | chr12:6772512   | Inverse variance weighted | 2  | -0.053 | 0.100 | 5.949E-01 | 0.949 | cis | Hospitalized COVID-19 |
| 6223_5    | GUC2B                             | Guanylate cyclase activator 2B                                                             | Q16661  | GUCA2B    | chr1:42153410   | Inverse variance weighted | 2  | -0.056 | 0.105 | 5.961E-01 | 0.949 | cis | Hospitalized COVID-19 |
| 9297_12   | B3GN8                             | UDP-GlcNAc:betaGal beta-1,3-N-acetylglucosaminyltransferase 8                              | Q727M8  | B3GN78    | chr19:41428730  | Inverse variance weighted | 6  | -0.011 | 0.021 | 5.969E-01 | 0.949 | cis | Hospitalized COVID-19 |
| 11248_43  | HEM4                              | Uroporphyrinogen-III synthase                                                              | P10746  | URO5      | chr10:125823258 | Inverse variance weighted | 4  | 0.027  | 0.052 | 5.982E-01 | 0.949 | cis | Hospitalized COVID-19 |
| 16900_29  | MDGA1                             | MAM domain-containing glycosylphosphatidylinositol anchor protein 1                        | Q8NF44  | MDGA1     | chr6:37699306   | Inverse variance weighted | 8  | -0.009 | 0.016 | 5.987E-01 | 0.949 | cis | Hospitalized COVID-19 |
| 19361_78  | MATN3                             | Matrilin-3                                                                                 | Q15232  | MATN3     | chr2:20012668   | Inverse variance weighted | 12 | 0.014  | 0.027 | 5.989E-01 | 0.949 | cis | Hospitalized COVID-19 |
| 11708_2   | LCN1                              | Lipocalin-1                                                                                | P31025  | LCN1      | chr9:135521438  | Wald ratio                | 1  | -0.079 | 0.150 | 5.990E-01 | 0.949 | cis | Hospitalized COVID-19 |
| 4535_50   | BST1                              | ADP-ribosyl cyclase/cyclic ADP-ribose hydrolase 2                                          | Q10588  | BST1      | chr4:15703065   | Inverse variance weighted | 11 | 0.007  | 0.013 | 5.991E-01 | 0.949 | cis | Hospitalized COVID-19 |
| 8304_50   | OPG                               | Tumor necrosis factor receptor superfamily member 11B                                      | O00300  | TNFRSF11B | chr8:118951885  | Inverse variance weighted | 4  | 0.030  | 0.057 | 5.999E-01 | 0.949 | cis | Hospitalized COVID-19 |
| 13545_97  | EIF1A                             | Probable RNA-binding protein EIF1AD                                                        | Q8YN98  | EIF1AD    | chr11:66002176  | Inverse variance weighted | 3  | 0.058  | 0.112 | 6.004E-01 | 0.949 | cis | Hospitalized COVID-19 |
| 6234_74   | VITRN                             | Vitrin                                                                                     | Q6NUX7  | VIT       | chr2:36696690   | Inverse variance weighted | 6  | -0.017 | 0.032 | 6.008E-01 | 0.949 | cis | Hospitalized COVID-19 |
| 12594_5   | GRAN                              | Grancalcin                                                                                 | P28676  | GCA       | chr2:162318840  | Inverse variance weighted | 2  | -0.018 | 0.035 | 6.017E-01 | 0.949 | cis | Hospitalized COVID-19 |
| 3299_29   | Contactin-5                       | Contactin-5                                                                                | Q94779  | CNTN5     | chr11:99020949  | Inverse variance weighted | 3  | 0.040  | 0.076 | 6.032E-01 | 0.949 | cis | Hospitalized COVID-19 |
| 5628_21   | SEM3G                             | Semaphorin-3G                                                                              | Q9NS98  | SEMA3G    | chr3:52445103   | Inverse variance weighted | 5  | 0.036  | 0.069 | 6.033E-01 | 0.949 | cis | Hospitalized COVID-19 |
| 8325_37   | ADH4                              | Alcohol dehydrogenase 4                                                                    | P08319  | ADH4      | chr4:99157792   | Wald ratio                | 1  | -0.065 | 0.125 | 6.034E-01 | 0.949 | cis | Hospitalized COVID-19 |
| 15299_102 | MESD2                             | LDLR chaperone MESD                                                                        | Q14696  | MESD      | chr15:80989828  | Wald ratio                | 1  | 0.117  | 0.225 | 6.039E-01 | 0.949 | cis | Hospitalized COVID-19 |
| 5021_13   | PPase                             | Inorganic pyrophosphatase                                                                  | Q15181  | PPA1      | chr10:70233911  | Inverse variance weighted | 4  | -0.034 | 0.065 | 6.042E-01 | 0.949 | cis | Hospitalized COVID-19 |
| 13669_6   | FGFR-3:ECD                        | Fibroblast growth factor receptor 3:Extracellular domain                                   | P22607  | FGFR3     | chr4:1793293    | Inverse variance weighted | 4  | -0.027 | 0.051 | 6.052E-01 | 0.949 | cis | Hospitalized COVID-19 |
| 11615_16  | DAPP1                             | Dual adapter for phosphotyrosine and 3-phosphotyrosine and 3-phosphoinositide              | Q9UN19  | DAPP1     | chr4:99816827   | Wald ratio                | 1  | 0.060  | 0.116 | 6.064E-01 | 0.949 | cis | Hospitalized COVID-19 |
| 7935_26   | LARGE                             | Glycosyltransferase-like protein LARGE1                                                    | O95461  | LARGE1    | chr22:33922841  | Inverse variance weighted | 2  | -0.049 | 0.096 | 6.066E-01 | 0.949 | cis | Hospitalized COVID-19 |
| 13930_3   | ABC3G                             | DNA dC->dU-editing enzyme APOBEC-3G                                                        | Q9HC16  | APOBEC3G  | chr22:39077067  | Inverse variance weighted | 2  | 0.040  | 0.077 | 6.071E-01 | 0.949 | cis | Hospitalized COVID-19 |
| 15525_294 | ADH1G                             | Alcohol dehydrogenase 1C                                                                   | P00326  | ADH1C     | chr4:99352746   | Wald ratio                | 1  | 0.041  | 0.079 | 6.083E-01 | 0.949 | cis | Hospitalized COVID-19 |
| 6431_68   | PCYOX                             | Prenylcysteine oxidase 1                                                                   | Q9UHG3  | PCYOX1    | chr2:70257386   | Inverse variance weighted | 6  | 0.009  | 0.018 | 6.095E-01 | 0.949 | cis | Hospitalized COVID-19 |
| 3000_66   | MBL                               | Mannose-binding protein C                                                                  | P11226  | MBL2      | chr10:52772784  | Inverse variance weighted | 9  | -0.009 | 0.018 | 6.106E-01 | 0.949 | cis | Hospitalized COVID-19 |
| 12431_13  | PELO                              | Protein pelota homolog                                                                     | Q9BRX2  | PELO      | chr5:52787916   | Wald ratio                | 1  | -0.111 | 0.219 | 6.124E-01 | 0.949 | cis | Hospitalized COVID-19 |
| 8697_38   | Glypican 1                        | Glypican-1                                                                                 | P35052  | GPC1      | chr2:240435663  | Inverse variance weighted | 5  | -0.012 | 0.024 | 6.125E-01 | 0.949 | cis | Hospitalized COVID-19 |
| 10737_96  | Serpin B1                         | Leukocyte elastase inhibitor                                                               | P30740  | SERP1NB1  | chr6:2841959    | Wald ratio                | 1  | 0.092  | 0.182 | 6.130E-01 | 0.949 | cis | Hospitalized COVID-19 |
| 3583_54   | Arylsulfatase A                   | Arylsulfatase A                                                                            | P15289  | ARSA      | chr22:50628173  | Wald ratio                | 1  | 0.063  | 0.125 | 6.132E-01 | 0.949 | cis | Hospitalized COVID-19 |
| 19293_6   | VP26A                             | Vacuolar protein sorting-associated protein 26A                                            | Q75436  | VP26A     | chr10:69123512  | Wald ratio                | 1  | -0.032 | 0.063 | 6.142E-01 | 0.949 | cis | Hospitalized COVID-19 |
| 3077_66   | Coagulation Factor Xa             | Coagulation factor Xa                                                                      | P00742  | F10       | chr13:113122799 | Inverse variance weighted | 2  | -0.076 | 0.152 | 6.155E-01 | 0.949 | cis | Hospitalized COVID-19 |
| 17680_12  | EPHB1                             | Ephrin type-B receptor 1                                                                   | P54762  | EPHB1     | chr3:134795260  | Inverse variance weighted | 3  | 0.027  | 0.055 | 6.156E-01 | 0.949 | cis | Hospitalized COVID-19 |
| 6060_2    | PIP                               | Prolactin-inducible protein                                                                | P12273  | PIP       | chr7:143132077  | Inverse variance weighted | 5  | -0.012 | 0.024 | 6.168E-01 | 0.949 | cis | Hospitalized COVID-19 |
| 9201_13   | Transgelin-2                      | Transgelin-2                                                                               | P37802  | TAGLN2    | chr1:159925507  | Wald ratio                | 1  | 0.113  | 0.227 | 6.169E-01 | 0.949 | cis | Hospitalized COVID-19 |
| 4969_2    | Carbonic anhydrase I              | Carbonic anhydrase 1                                                                       | P00915  | CA1       | chr8:85379014   | Inverse variance weighted | 3  | 0.036  | 0.071 | 6.181E-01 | 0.949 | cis | Hospitalized COVID-19 |
| 17773_26  | SNAG                              | Gamma-soluble NSF attachment protein                                                       | Q99747  | NAPG      | chr18:10525905  | Wald ratio                | 1  | 0.073  | 0.146 | 6.183E-01 | 0.949 | cis | Hospitalized COVID-19 |
| 3894_15   | NAGK                              | N-acetyl-D-glucosamine kinase                                                              | Q9UJ70  | NAGK      | chr2:71064344   | Inverse variance weighted | 3  | -0.027 | 0.054 | 6.186E-01 | 0.949 | cis | Hospitalized COVID-19 |
| 9916_146  | LRCA8:ECD                         | Leucine-rich repeat-containing protein 4B:Extracellular domain                             | Q9NT99  | LRCA8     | chr19:50568435  | Inverse variance weighted | 2  | -0.101 | 0.203 | 6.191E-01 | 0.949 | cis | Hospitalized COVID-19 |
| 8479_4    | MMP-10                            | Stromelysin-2                                                                              | P09238  | MMP10     | chr11:102780628 | Inverse variance weighted | 6  | -0.023 | 0.047 | 6.198E-01 | 0.949 | cis | Hospitalized COVID-19 |
| 3810_50   | FGR                               | Tyrosine-protein kinase Fgr                                                                | P09769  | FGR       | chr1:27635185   | Inverse variance weighted | 2  | 0.074  | 0.150 | 6.212E-01 | 0.949 | cis | Hospitalized COVID-19 |
| 5763_67   | HBD-4                             | Beta-defensin 104                                                                          | Q8WTQ1  | DEFB104A  | chr8:7836436    | Inverse variance weighted | 2  | -0.117 | 0.239 | 6.225E-01 | 0.949 | cis | Hospitalized COVID-19 |
| 7173_141  | T132C:ECD                         | Transmembrane protein 132C:Extracellular domain                                            | Q8NB316 | TMEM132C  | chr12:128267170 | Inverse variance weighted | 5  | 0.023  | 0.047 | 6.226E-01 | 0.949 | cis | Hospitalized COVID-19 |
| 18321_38  | MTDC                              | Bifunctional methylenetetrahydrofolate dehydrogenase/cyclohydrolase, mitochondrial         | P13995  | MTFHD2    | chr2:74186172   | Inverse variance weighted | 2  | 0.051  | 0.105 | 6.226E-01 | 0.949 | cis | Hospitalized COVID-19 |
| 4961_17   | annexin II                        | Annexin A2                                                                                 | P07355  | ANXA2     | chr15:60402883  | Inverse variance weighted | 2  | 0.065  | 0.133 | 6.238E-01 | 0.949 | cis | Hospitalized COVID-19 |
| 2855_49   | ERK-1                             | Mitogen-activated protein kinase 3                                                         | P27361  | MAPK3     | chr16:30123506  | Inverse variance weighted | 3  | 0.028  | 0.057 | 6.238E-01 | 0.949 | cis | Hospitalized COVID-19 |
| 3805_16   | Endocan                           | Endothelial cell-specific molecule 1                                                       | Q9NQ30  | ESM1      | chr5:55022671   | Inverse variance weighted | 3  | -0.033 | 0.067 | 6.240E-01 | 0.949 | cis | Hospitalized COVID-19 |
| 7918_114  | Amylase, alpha 1A                 | Alpha-amylase 1                                                                            | P04745  | AMY1A     | chr1:103655760  | Inverse variance weighted | 11 | 0.021  | 0.043 | 6.240E-01 | 0.949 | cis | Hospitalized COVID-19 |
| 13534_20  | MYOM2                             | Myomesin-2                                                                                 | P54296  | MYOM2     | chr8:2045046    | Inverse variance weighted | 3  | -0.066 | 0.135 | 6.246E-01 | 0.949 | cis | Hospitalized COVID-19 |
| 2692_74   | NPS-PLA2                          | Phospholipase A2, membrane associated                                                      | P14555  | PLA2G2A   | chr1:19980416   | Inverse variance weighted | 6  | -0.009 | 0.019 | 6.248E-01 | 0.949 | cis | Hospitalized COVID-19 |
| 5452_71   | ASGR1                             | Asialoglycoprotein receptor 1                                                              | P07306  | ASGR1     | chr17:7179564   | Inverse variance weighted | 2  | -0.054 | 0.110 | 6.253E-01 | 0.949 | cis | Hospitalized COVID-19 |
| 11531_24  | GI24:CD                           | V-type immunoglobulin domain-containing suppressor of T-cell activation:Cytoplasmic domain | Q9H7M9  | VSIR      | chr10:71773520  | Wald ratio                | 1  | 0.081  | 0.166 | 6.259E-01 | 0.949 | cis | Hospitalized COVID-19 |
| 4467_49   | SPARCL1                           | SPARC-like protein 1                                                                       | Q14515  | SPARCL1   | chr4:87531061   | Inverse variance weighted | 6  | 0.012  | 0.024 | 6.263E-01 | 0.949 | cis | Hospitalized COVID-19 |
| 13621_31  | AP2A2                             | AP-2 complex subunit alpha-2                                                               | Q94973  | AP2A2     | chr11:924881    | Wald ratio                | 1  | 0.079  | 0.163 | 6.269E-01 | 0.949 | cis | Hospitalized COVID-19 |
| 3378_49   | Kallikrein 7                      | Kallikrein-7                                                                               | P49862  | KLK7      | chr19:50984099  | Inverse variance weighted | 2  | -0.056 | 0.116 | 6.269E-01 | 0.949 | cis | Hospitalized COVID-19 |
| 15533_97  | Macrophage scavenger receptor:ECD | Macrophage scavenger receptor types I and II:Extracellular domain                          | P21757  | MSR1      | chr8:16567490   | Inverse variance weighted | 5  | -0.018 | 0.036 | 6.270E-01 | 0.949 | cis | Hospitalized COVID-19 |
| 13934_3   | MCF2L                             | Guanine nucleotide exchange factor DBS                                                     | O15068  | MCF2L     | chr13:112894378 | Wald ratio                | 1  | -0.024 | 0.050 | 6.274E-01 | 0.949 | cis | Hospitalized COVID-19 |
| 3593_72   | Caspase-3                         | Caspase-3                                                                                  | P42574  | CASP3     | chr4:184650062  | Wald ratio                | 1  | 0.042  | 0.087 | 6.279E-01 | 0.949 | cis | Hospitalized COVID-19 |
| 5632_6    | CRAC1                             | Cartilage acidic protein 1                                                                 | Q9NQ79  | CRTA1     | chr10:98030828  | Inverse variance weighted | 9  | -0.017 | 0.034 | 6.282E-01 | 0.949 | cis | Hospitalized COVID-19 |
| 13388_57  | NEC1                              | Neuroendocrine convertase 1                                                                | P29120  | PCSK1     | chr5:96434143   | Inverse variance weighted | 7  | -0.021 | 0.043 | 6.287E-01 | 0.949 | cis | Hospitalized COVID-19 |
| 11142_11  | ANG11:C-term                      | Angiotensin-related protein 11:C-Term, Fibrinogen domain                                   | O95841  | ANGPT11   | chr1:178871077  | Inverse variance weighted | 4  | 0.016  | 0.033 | 6.290E-01 | 0.949 | cis | Hospitalized COVID-19 |
| 10800_15  | Collagen-binding protein          | Serpin H1                                                                                  | P50454  | SERP1NH1  | chr11:75562056  | Inverse variance weighted | 2  | -0.039 | 0.081 | 6.293E-01 | 0.949 | cis | Hospitalized COVID-19 |
| 2602_2    | Angiotensin-2                     | Angiotensin-2                                                                              | O15123  | ANGPT2    | chr8:6563409    | Inverse variance weighted | 3  | 0.033  | 0.069 | 6.296E-01 | 0.949 | cis | Hospitalized COVID-19 |
| 2571_12   | IGFBP-3                           | Insulin-like growth factor-binding protein 3                                               | P17936  | IGFBP3    | chr7:45921874   | Inverse variance weighted | 4  | -0.019 | 0.040 | 6.297E-01 | 0.949 | cis | Hospitalized COVID-19 |
| 15573_110 | CSPG3                             | Neurocan core protein                                                                      | O14594  | NCAN      | chr19:19211958  | Inverse variance weighted | 2  | -0.037 | 0.078 | 6.302E-01 | 0.949 | cis | Hospitalized COVID-19 |
| 3440_7    | granzyme A                        | Granzyme A                                                                                 | P12544  | GZMA      | chr5:55102646   | Inverse variance weighted | 4  | 0.020  | 0.041 | 6.310E-01 | 0.949 | cis | Hospitalized COVID-19 |
| 10903_50  | STX8                              | Syntaxin-8                                                                                 | Q9UNK0  | STX8      | chr17:9576591   | Wald ratio                | 1  | 0.078  | 0.163 | 6.320E-01 | 0.949 | cis | Hospitalized COVID-19 |

|           |                            |                                                                            |        |         |                 |                           |    |        |       |           |       |     |                       |
|-----------|----------------------------|----------------------------------------------------------------------------|--------|---------|-----------------|---------------------------|----|--------|-------|-----------|-------|-----|-----------------------|
| 9370_69   | GGH                        | Gamma-glutamyl hydrolase                                                   | Q92820 | GGH     | chr8:63039407   | Inverse variance weighted | 5  | -0.012 | 0.026 | 6.321E-01 | 0.949 | cis | Hospitalized COVID-19 |
| 19590_46  | SP-D                       | Pulmonary surfactant-associated protein D                                  | P35247 | SFTPD   | chr10:79982614  | Inverse variance weighted | 7  | -0.020 | 0.041 | 6.322E-01 | 0.949 | cis | Hospitalized COVID-19 |
| 3296_92   | CNTN2                      | Contactin-2                                                                | Q02246 | CNTN2   | chr12:205042937 | Inverse variance weighted | 9  | 0.012  | 0.025 | 6.331E-01 | 0.949 | cis | Hospitalized COVID-19 |
| 5631_83   | MOT1                       | Promotilin                                                                 | P12872 | MLN     | chr6:33804003   | Inverse variance weighted | 6  | 0.012  | 0.025 | 6.331E-01 | 0.949 | cis | Hospitalized COVID-19 |
| 15395_15  | GST M1-1                   | Glutathione S-transferase Mu 1                                             | P09488 | GSTM1   | chr1:109687814  | Inverse variance weighted | 5  | -0.029 | 0.061 | 6.351E-01 | 0.952 | cis | Hospitalized COVID-19 |
| 12334_25  | cSHMT                      | Serine hydroxymethyltransferase, cytosolic                                 | P34896 | SHMT1   | chr17:18363563  | Inverse variance weighted | 6  | -0.010 | 0.022 | 6.359E-01 | 0.952 | cis | Hospitalized COVID-19 |
| 6366_38   | TXD15                      | Thioredoxin domain-containing protein 15                                   | Q96142 | TXND15  | chr5:134874371  | Inverse variance weighted | 3  | 0.014  | 0.029 | 6.379E-01 | 0.954 | cis | Hospitalized COVID-19 |
| 15530_33  | EphB4                      | Ephrin type-B receptor 4                                                   | P54760 | EPHB4   | chr7:100827523  | Wald ratio                | 1  | -0.062 | 0.133 | 6.398E-01 | 0.955 | cis | Hospitalized COVID-19 |
| 16300_4   | TREM2                      | Triggering receptor expressed on myeloid cells 2                           | Q9N2C2 | TREM2   | chr6:41163186   | Inverse variance weighted | 7  | 0.017  | 0.036 | 6.399E-01 | 0.955 | cis | Hospitalized COVID-19 |
| 5134_52   | TIMD3                      | Hepatitis A virus cellular receptor 2                                      | Q8TDQ0 | HAVCR2  | chr5:157142869  | Inverse variance weighted | 7  | 0.012  | 0.027 | 6.420E-01 | 0.957 | cis | Hospitalized COVID-19 |
| 2827_23   | Fractalkine/CX3CL1         | Fractalkine                                                                | P78423 | CX3CL1  | chr16:57372477  | Wald ratio                | 1  | -0.040 | 0.086 | 6.422E-01 | 0.957 | cis | Hospitalized COVID-19 |
| 5509_7    | EGF:ECD                    | Epidermal growth factor:Extracellular domain                               | P01133 | EGF     | chr4:109912883  | Inverse variance weighted | 4  | -0.042 | 0.091 | 6.432E-01 | 0.957 | cis | Hospitalized COVID-19 |
| 16620_26  | LY75                       | Lymphocyte antigen 75                                                      | P06049 | LY75    | chr2:159904756  | Inverse variance weighted | 7  | 0.011  | 0.024 | 6.438E-01 | 0.957 | cis | Hospitalized COVID-19 |
| 18206_18  | ADH6                       | Alcohol dehydrogenase 6                                                    | P28332 | ADH6    | chr4:99219537   | Wald ratio                | 1  | 0.077  | 0.166 | 6.444E-01 | 0.957 | cis | Hospitalized COVID-19 |
| 8957_72   | XTP3B                      | Endoplasmic reticulum lectin 1                                             | Q96021 | ERLEC1  | chr2:53787009   | Wald ratio                | 1  | -0.070 | 0.152 | 6.448E-01 | 0.957 | cis | Hospitalized COVID-19 |
| 13088_397 | BTC                        | Betacellulin                                                               | P35070 | BTC     | chr4:74794523   | Inverse variance weighted | 2  | 0.028  | 0.061 | 6.448E-01 | 0.957 | cis | Hospitalized COVID-19 |
| 17350_13  | CHM2B                      | Charged multivesicular body protein 2b                                     | Q9UQN3 | CHMP2B  | chr3:87272721   | Inverse variance weighted | 3  | -0.024 | 0.052 | 6.458E-01 | 0.957 | cis | Hospitalized COVID-19 |
| 17724_3   | WWOX                       | WW domain-containing oxidoreductase                                        | Q9NCZ7 | WWOX    | chr16:78099400  | Wald ratio                | 1  | 0.063  | 0.138 | 6.477E-01 | 0.959 | cis | Hospitalized COVID-19 |
| 2948_58   | Growth hormone receptor    | Growth hormone receptor                                                    | P10912 | GHR     | chr5:42423439   | Inverse variance weighted | 4  | 0.022  | 0.048 | 6.500E-01 | 0.961 | cis | Hospitalized COVID-19 |
| 6649_51   | NET1                       | Netrin-1                                                                   | O95631 | NTN1    | chr17:9021510   | Inverse variance weighted | 6  | 0.016  | 0.036 | 6.502E-01 | 0.961 | cis | Hospitalized COVID-19 |
| 13717_15  | FCN2                       | Ficolin-2                                                                  | Q15485 | FCN2    | chr9:134880810  | Inverse variance weighted | 8  | -0.018 | 0.041 | 6.505E-01 | 0.961 | cis | Hospitalized COVID-19 |
| 13536_56  | POL1                       | DNA polymerase iota                                                        | Q9UNA4 | POL1    | chr18:54269517  | Wald ratio                | 1  | -0.052 | 0.116 | 6.514E-01 | 0.961 | cis | Hospitalized COVID-19 |
| 7179_69   | NFASC                      | Neurofascin                                                                | O94856 | NFASC   | chr1:204828651  | Inverse variance weighted | 4  | -0.013 | 0.028 | 6.516E-01 | 0.961 | cis | Hospitalized COVID-19 |
| 10070_22  | PLCG2                      | 1-phosphatidylinositol 4,5-bisphosphate phosphodiesterase gamma-2          | P16885 | PLCG2   | chr16:81779279  | Inverse variance weighted | 2  | 0.079  | 0.175 | 6.525E-01 | 0.961 | cis | Hospitalized COVID-19 |
| 8402_22   | CYT11                      | Cytokine-like protein 1                                                    | Q9NRR1 | CYT11   | chr4:5019458    | Inverse variance weighted | 3  | -0.031 | 0.069 | 6.531E-01 | 0.961 | cis | Hospitalized COVID-19 |
| 5092_51   | JAG1:ECD                   | Protein jagged-1:Extracellular domain                                      | P78504 | JAG1    | chr20:10673999  | Inverse variance weighted | 2  | -0.063 | 0.140 | 6.542E-01 | 0.961 | cis | Hospitalized COVID-19 |
| 3210_1    | METAP1                     | Methionine aminopeptidase 1                                                | P53582 | METAP1  | chr4:98995659   | Wald ratio                | 1  | -0.094 | 0.211 | 6.546E-01 | 0.961 | cis | Hospitalized COVID-19 |
| 7761_125  | CHKB                       | Choline/ethanolamine kinase                                                | Q9Y259 | CHKB    | chr22:50601455  | Inverse variance weighted | 3  | 0.044  | 0.099 | 6.552E-01 | 0.961 | cis | Hospitalized COVID-19 |
| 17398_55  | HO-1                       | Heme oxygenase 1                                                           | P09601 | HMOX1   | chr22:35380361  | Inverse variance weighted | 2  | -0.049 | 0.111 | 6.554E-01 | 0.961 | cis | Hospitalized COVID-19 |
| 18930_28  | SLIT2                      | Slit homolog 2 protein                                                     | O94813 | SLIT2   | chr4:20251905   | Inverse variance weighted | 2  | 0.039  | 0.088 | 6.568E-01 | 0.963 | cis | Hospitalized COVID-19 |
| 10832_24  | B4GT6                      | Beta-1,4-galactosyltransferase 6                                           | Q9UBX8 | B4GALT6 | chr18:31685836  | Inverse variance weighted | 4  | -0.010 | 0.023 | 6.580E-01 | 0.964 | cis | Hospitalized COVID-19 |
| 9793_145  | IGDC4                      | Immunoglobulin superfamily DCC subclass member 4                           | Q8TDY8 | IGDCC4  | chr15:65422947  | Inverse variance weighted | 7  | 0.015  | 0.033 | 6.591E-01 | 0.964 | cis | Hospitalized COVID-19 |
| 3339_33   | TSP2                       | Thrombospondin-2                                                           | P35442 | THBS2   | chr6:169254050  | Inverse variance weighted | 7  | 0.011  | 0.026 | 6.594E-01 | 0.964 | cis | Hospitalized COVID-19 |
| 9329_28   | TRML1:ECD                  | Trem-like transcript 1 protein:Extracellular domain, Ig-like V-type domain | Q86YW5 | TREML1  | chr9:41154347   | Inverse variance weighted | 2  | -0.043 | 0.098 | 6.606E-01 | 0.964 | cis | Hospitalized COVID-19 |
| 3448_13   | IR                         | Insulin receptor                                                           | P06213 | INSR    | chr19:7294414   | Wald ratio                | 1  | -0.063 | 0.145 | 6.610E-01 | 0.964 | cis | Hospitalized COVID-19 |
| 12459_13  | PKHA1                      | Pleckstrin homology domain-containing family A member 1                    | Q9HB21 | PLEKHA1 | chr10:122374696 | Inverse variance weighted | 4  | 0.015  | 0.033 | 6.614E-01 | 0.964 | cis | Hospitalized COVID-19 |
| 15559_5   | ANTR2                      | Anthrax toxin receptor 2                                                   | P58335 | ANTXR2  | chr4:80125454   | Inverse variance weighted | 4  | -0.023 | 0.052 | 6.618E-01 | 0.964 | cis | Hospitalized COVID-19 |
| 13044_5   | TS101                      | Tumor susceptibility gene 101 protein                                      | Q99816 | TSG101  | chr11:18526951  | Inverse variance weighted | 2  | -0.049 | 0.113 | 6.629E-01 | 0.965 | cis | Hospitalized COVID-19 |
| 9357_4    | CREG1                      | Protein CREG1                                                              | O75629 | CREG1   | chr1:167553805  | Inverse variance weighted | 2  | -0.034 | 0.079 | 6.643E-01 | 0.965 | cis | Hospitalized COVID-19 |
| 2418_55   | Apo E                      | Apolipoprotein E                                                           | P02649 | APOE    | chr19:44905791  | Inverse variance weighted | 4  | 0.040  | 0.092 | 6.646E-01 | 0.965 | cis | Hospitalized COVID-19 |
| 2774_10   | IL-16                      | Interleukin-16                                                             | Q14005 | IL16    | chr15:81159575  | Inverse variance weighted | 10 | -0.010 | 0.024 | 6.650E-01 | 0.965 | cis | Hospitalized COVID-19 |
| 11287_14  | Cytochrome b5              | Cytochrome b5                                                              | P00167 | CYB5A   | chr18:74291973  | Wald ratio                | 1  | 0.113  | 0.262 | 6.653E-01 | 0.965 | cis | Hospitalized COVID-19 |
| 3322_52   | LRIG3                      | Leucine-rich repeats and immunoglobulin-like domains protein 3             | Q6UXM1 | LRIG3   | chr12:58920504  | Inverse variance weighted | 6  | 0.014  | 0.033 | 6.667E-01 | 0.965 | cis | Hospitalized COVID-19 |
| 17345_12  | ZADH2                      | Prostaglandin reductase 3                                                  | Q8NAQ0 | PTGR3   | chr18:75209139  | Wald ratio                | 1  | -0.044 | 0.103 | 6.668E-01 | 0.965 | cis | Hospitalized COVID-19 |
| 12575_30  | C17C                       | C-1-tetrahydrofolate synthase, cytoplasmic                                 | P11586 | MTHFD1  | chr14:64388031  | Inverse variance weighted | 2  | 0.105  | 0.245 | 6.686E-01 | 0.965 | cis | Hospitalized COVID-19 |
| 10948_14  | PLD3                       | Phospholipase D3                                                           | Q8IV08 | PLD3    | chr19:40348456  | Wald ratio                | 1  | -0.091 | 0.212 | 6.687E-01 | 0.965 | cis | Hospitalized COVID-19 |
| 14009_65  | TNFAIP3                    | Tumor necrosis factor alpha-induced protein 3                              | P21580 | TNFAIP3 | chr6:137867214  | Wald ratio                | 1  | -0.028 | 0.065 | 6.696E-01 | 0.965 | cis | Hospitalized COVID-19 |
| 4158_54   | uPA                        | Urokinase-type plasminogen activator                                       | P00749 | PLAU    | chr10:73909177  | Inverse variance weighted | 4  | -0.015 | 0.036 | 6.697E-01 | 0.965 | cis | Hospitalized COVID-19 |
| 3234_23   | URB                        | Coiled-coil domain-containing protein 80                                   | Q76M96 | CCDC80  | chr3:112649530  | Inverse variance weighted | 2  | -0.043 | 0.102 | 6.702E-01 | 0.965 | cis | Hospitalized COVID-19 |
| 12820_1   | GRAP                       | GRB2-related adapter protein                                               | Q13588 | GRAP    | chr17:19047011  | Wald ratio                | 1  | 0.122  | 0.288 | 6.716E-01 | 0.965 | cis | Hospitalized COVID-19 |
| 8766_29   | LRAS                       | Leukocyte immunoglobulin-like receptor subfamily A member 5                | AGN173 | LIRAS   | chr19:54313166  | Wald ratio                | 1  | -0.074 | 0.175 | 6.719E-01 | 0.965 | cis | Hospitalized COVID-19 |
| 5615_62   | F172A                      | Protein FAM172A                                                            | Q8WUF8 | FAM172A | chr5:94111699   | Wald ratio                | 1  | -0.063 | 0.148 | 6.720E-01 | 0.965 | cis | Hospitalized COVID-19 |
| 6897_38   | B3GA3                      | Galactosylgalactosylxylosylprotein 3-beta-glucuronosyltransferase 3        | O94766 | B3GAT3  | chr11:62622154  | Inverse variance weighted | 3  | -0.019 | 0.046 | 6.722E-01 | 0.965 | cis | Hospitalized COVID-19 |
| 5630_48   | CM35H                      | CMRF35-like molecule 8                                                     | Q9UGN4 | CD300A  | chr17:74466399  | Inverse variance weighted | 8  | 0.010  | 0.023 | 6.729E-01 | 0.965 | cis | Hospitalized COVID-19 |
| 14151_4   | UCRP                       | Ubiquitin-like protein ISG15                                               | P05161 | ISG15   | chr1:10011138   | Inverse variance weighted | 2  | -0.013 | 0.032 | 6.729E-01 | 0.965 | cis | Hospitalized COVID-19 |
| 11212_7   | TXND5                      | Thioredoxin domain-containing protein 5                                    | Q8NB59 | TXND5   | chr6:79107088   | Inverse variance weighted | 6  | -0.018 | 0.042 | 6.733E-01 | 0.965 | cis | Hospitalized COVID-19 |
| 14091_42  | Carbonyl reductase 3       | Carbonyl reductase [NADPH] 3                                               | O75828 | CBR3    | chr21:36135079  | Inverse variance weighted | 6  | 0.012  | 0.029 | 6.740E-01 | 0.965 | cis | Hospitalized COVID-19 |
| 13094_75  | RSP03                      | R-spondin-3                                                                | Q9BXV4 | RSP03   | chr6:127118671  | Wald ratio                | 1  | 0.070  | 0.167 | 6.753E-01 | 0.965 | cis | Hospitalized COVID-19 |
| 8893_29   | PARP:region 1              | Poly (ADP-ribose) polymerase 1:region 1                                    | P09874 | PARP1   | chr1:226408154  | Wald ratio                | 1  | -0.085 | 0.204 | 6.759E-01 | 0.965 | cis | Hospitalized COVID-19 |
| 14131_37  | EFNB2:ECD                  | Ephrin-B2:Extracellular domain                                             | P52799 | EFNB2   | chr13:106535662 | Inverse variance weighted | 2  | -0.062 | 0.148 | 6.760E-01 | 0.965 | cis | Hospitalized COVID-19 |
| 11211_7   | TBCE                       | Tubulin-specific chaperone E                                               | Q15813 | TBCE    | chr1:235367360  | Inverse variance weighted | 2  | -0.066 | 0.158 | 6.766E-01 | 0.965 | cis | Hospitalized COVID-19 |
| 13107_9   | LYPD3                      | Ly6/PLAUR domain-containing protein 3                                      | O95274 | LYPD3   | chr19:43465608  | Wald ratio                | 1  | -0.048 | 0.116 | 6.772E-01 | 0.965 | cis | Hospitalized COVID-19 |
| 15535_3   | Marapsin                   | Serine protease 27                                                         | Q9BQR3 | PRSS27  | chr16:2720551   | Wald ratio                | 1  | -0.033 | 0.080 | 6.774E-01 | 0.965 | cis | Hospitalized COVID-19 |
| 12612_37  | PSB1                       | Proteasome subunit beta type-1                                             | P20618 | PSMB1   | chr6:170553307  | Inverse variance weighted | 2  | 0.024  | 0.057 | 6.777E-01 | 0.965 | cis | Hospitalized COVID-19 |
| 2677_1    | ERBB1                      | Epidermal growth factor receptor                                           | P00533 | EGFR    | chr7:55019017   | Inverse variance weighted | 3  | 0.030  | 0.071 | 6.785E-01 | 0.965 | cis | Hospitalized COVID-19 |
| 9223_11   | ARMET                      | Mesencephalic astrocyte-derived neurotrophic factor                        | P55145 | MANF    | chr3:51385291   | Wald ratio                | 1  | -0.077 | 0.187 | 6.800E-01 | 0.965 | cis | Hospitalized COVID-19 |
| 9981_18   | K1467:C-term               | Protein FAM234B:C-term                                                     | A2RU67 | FAM234B | chr12:13044381  | Inverse variance weighted | 5  | -0.025 | 0.061 | 6.802E-01 | 0.965 | cis | Hospitalized COVID-19 |
| 3516_60   | SDF-1                      | Stromal cell-derived factor 1                                              | P48061 | CXCL12  | chr10:44386493  | Inverse variance weighted | 2  | 0.048  | 0.116 | 6.816E-01 | 0.965 | cis | Hospitalized COVID-19 |
| 2913_1    | MP1F-1                     | C-C motif chemokine 23                                                     | P55773 | CCl23   | chr17:36017972  | Inverse variance weighted | 2  | -0.047 | 0.114 | 6.821E-01 | 0.965 | cis | Hospitalized COVID-19 |
| 16781_2   | ENASE                      | Cytosolic endo-beta-N-acetylglucosaminidase                                | Q8NF13 | ENGASE  | chr17:79074824  | Inverse variance weighted | 9  | 0.010  | 0.025 | 6.840E-01 | 0.965 | cis | Hospitalized COVID-19 |
| 3640_14   | RAP                        | alpha-2-macroglobulin receptor-associated protein                          | P30533 | LRPAP1  | chr4:3532446    | Inverse variance weighted | 4  | 0.033  | 0.081 | 6.843E-01 | 0.965 | cis | Hospitalized COVID-19 |
| 4968_50   | CAPG                       | Macrophage-capping protein                                                 | P40121 | CAPG    | chr2:85418432   | Inverse variance weighted | 4  | 0.015  | 0.037 | 6.844E-01 | 0.965 | cis | Hospitalized COVID-19 |
| 3025_50   | bFGF                       | Fibroblast growth factor 2                                                 | P09038 | FGF2    | chr4:122826682  | Inverse variance weighted | 6  | -0.012 | 0.029 | 6.845E-01 | 0.965 | cis | Hospitalized COVID-19 |
| 9839_148  | Tirap                      | Toll/interleukin-1 receptor domain-containing adapter protein              | P58753 | TIRAP   | chr11:126282497 | Inverse variance weighted | 3  | 0.029  | 0.071 | 6.848E-01 | 0.965 | cis | Hospitalized COVID-19 |
| 16324_38  | TLR1:ECD                   | Toll-like receptor 1:Extracellular domain                                  | Q15399 | TLR1    | chr4:38856817   | Wald ratio                | 1  | 0.035  | 0.086 | 6.850E-01 | 0.965 | cis | Hospitalized COVID-19 |
| 15570_99  | Complement receptor type 2 | Complement receptor type 2                                                 | P20023 | CR2     | chr1:207453024  | Inverse variance weighted | 3  | 0.028  | 0.068 | 6.862E-01 | 0.965 | cis | Hospitalized COVID-19 |
| 12357_41  | SNP29                      | Synaptosomal-associated protein 29                                         | O95721 | SNAP29  | chr22:20859007  | Wald ratio                | 1  | 0.067  | 0.166 | 6.868E-01 | 0.965 | cis | Hospitalized COVID-19 |
| 18458_4   | PGES2                      | Prostaglandin E synthase 2                                                 | Q9H727 | PTGES2  | chr9:128128462  | Wald ratio                | 1  | -0.055 | 0.137 | 6.872E-01 | 0.965 | cis | Hospitalized COVID-19 |



|           |                           |                                                                                |        |          |                 |                           |    |        |       |           |       |     |                       |
|-----------|---------------------------|--------------------------------------------------------------------------------|--------|----------|-----------------|---------------------------|----|--------|-------|-----------|-------|-----|-----------------------|
| 17453_34  | Ceruloplasmin             | Ceruloplasmin                                                                  | P00450 | CP       | chr3:149221829  | Inverse variance weighted | 3  | -0.029 | 0.086 | 7.391E-01 | 0.974 | cis | Hospitalized COVID-19 |
| 13982_33  | RGS18                     | Regulator of G-protein signaling 18                                            | Q9N528 | RGS18    | chr1:192158462  | Wald ratio                | 1  | -0.057 | 0.173 | 7.394E-01 | 0.974 | cis | Hospitalized COVID-19 |
| 3132_1    | VEGF-C                    | Vascular endothelial growth factor C                                           | P49767 | VEGFC    | chr4:176792922  | Wald ratio                | 1  | -0.042 | 0.126 | 7.397E-01 | 0.974 | cis | Hospitalized COVID-19 |
| 7156_2    | FUT10                     | Alpha-(1,3)-fucosyltransferase 10                                              | Q6P4F1 | FUT10    | chr8:33473146   | Inverse variance weighted | 7  | 0.007  | 0.023 | 7.400E-01 | 0.974 | cis | Hospitalized COVID-19 |
| 9545_156  | Granzyme K                | Granzyme K                                                                     | P49863 | GZMK     | chr5:55024256   | Wald ratio                | 1  | 0.024  | 0.072 | 7.403E-01 | 0.974 | cis | Hospitalized COVID-19 |
| 12020_39  | PMGE                      | Bisphosphoglycerate mutase                                                     | P07738 | BPGM     | chr7:134646811  | Wald ratio                | 1  | 0.089  | 0.271 | 7.423E-01 | 0.974 | cis | Hospitalized COVID-19 |
| 2991_9    | IL-1 sRI                  | Interleukin-1 receptor type 1                                                  | P14778 | IL1RI    | chr2:102064544  | Inverse variance weighted | 2  | -0.024 | 0.074 | 7.425E-01 | 0.974 | cis | Hospitalized COVID-19 |
| 6576_1    | ART4                      | Ecto-ADP-ribosyltransferase 4                                                  | Q93070 | ART4     | chr12:14843526  | Inverse variance weighted | 12 | 0.006  | 0.018 | 7.432E-01 | 0.974 | cis | Hospitalized COVID-19 |
| 3835_11   | TLR2                      | Toll-like receptor 2                                                           | O60603 | TLR2     | chr4:153684070  | Wald ratio                | 1  | 0.105  | 0.322 | 7.433E-01 | 0.974 | cis | Hospitalized COVID-19 |
| 12786_61  | GDE5                      | Glycerophosphocholine phosphodiesterase GPCPD1                                 | Q9NP88 | GPCPD1   | chr20:5611006   | Inverse variance weighted | 2  | -0.037 | 0.112 | 7.436E-01 | 0.974 | cis | Hospitalized COVID-19 |
| 3060_43   | C9                        | Complement component C9                                                        | P02748 | C9       | chr5:39371324   | Inverse variance weighted | 5  | -0.016 | 0.050 | 7.438E-01 | 0.974 | cis | Hospitalized COVID-19 |
| 10558_26  | PCDH9                     | Protocadherin-9                                                                | Q9HC56 | PCDH9    | chr13:67230445  | Inverse variance weighted | 4  | -0.013 | 0.039 | 7.448E-01 | 0.974 | cis | Hospitalized COVID-19 |
| 6379_62   | ATL2                      | ADAMTS-like protein 2                                                          | Q86TH1 | ADAMTSL2 | chr9:133532164  | Inverse variance weighted | 2  | -0.053 | 0.164 | 7.456E-01 | 0.974 | cis | Hospitalized COVID-19 |
| 3518_54   | TAFI                      | Carboxypeptidase B2                                                            | Q96IY4 | CPB2     | chr13:46105033  | Inverse variance weighted | 5  | 0.008  | 0.025 | 7.460E-01 | 0.974 | cis | Hospitalized COVID-19 |
| 3173_49   | ASAH1                     | N-acyl ethanolamine-hydrolyzing acid amidase                                   | Q02083 | NAAA     | chr4:75941013   | Inverse variance weighted | 10 | 0.009  | 0.029 | 7.460E-01 | 0.974 | cis | Hospitalized COVID-19 |
| 18338_26  | IDH                       | Isocitrate dehydrogenase [NADP] cytoplasmic                                    | O75874 | IDH1     | chr2:208266074  | Inverse variance weighted | 3  | -0.012 | 0.037 | 7.485E-01 | 0.976 | cis | Hospitalized COVID-19 |
| 5658_64   | coagulation factor XIII B | Coagulation factor XIII B chain                                                | P05160 | F13B     | chr1:197067260  | Wald ratio                | 1  | -0.032 | 0.101 | 7.485E-01 | 0.976 | cis | Hospitalized COVID-19 |
| 7861_9    | ROR2                      | Tyrosine-protein kinase transmembrane receptor ROR2                            | Q01974 | ROR2     | chr9:91950228   | Inverse variance weighted | 2  | -0.029 | 0.091 | 7.500E-01 | 0.976 | cis | Hospitalized COVID-19 |
| 10908_2   | GLT13                     | Polypeptide N-acetylgalactosaminyltransferase 13                               | Q8IU08 | GALT13   | chr2:153871922  | Wald ratio                | 1  | 0.061  | 0.191 | 7.509E-01 | 0.976 | cis | Hospitalized COVID-19 |
| 10977_55  | UCMA                      | Unique cartilage matrix-associated protein                                     | Q8WVF2 | UCMA     | chr10:13234374  | Inverse variance weighted | 6  | 0.010  | 0.030 | 7.509E-01 | 0.976 | cis | Hospitalized COVID-19 |
| 18225_13  | HEBP1                     | Heme-binding protein 1                                                         | Q9NRV9 | HEBP1    | chr12:13000265  | Inverse variance weighted | 6  | 0.006  | 0.018 | 7.525E-01 | 0.976 | cis | Hospitalized COVID-19 |
| 4440_15   | FCRL3                     | Fc receptor-like protein 3                                                     | Q96P31 | FCRL3    | chr1:157700769  | Inverse variance weighted | 4  | 0.021  | 0.067 | 7.534E-01 | 0.976 | cis | Hospitalized COVID-19 |
| 5939_42   | TWEAK                     | Tumor necrosis factor ligand superfamily member 12                             | O43508 | TNFSF12  | chr17:7548508   | Inverse variance weighted | 3  | -0.027 | 0.088 | 7.543E-01 | 0.976 | cis | Hospitalized COVID-19 |
| 3314_74   | GFRa-1                    | GNF family receptor alpha-1                                                    | P56159 | GFRa1    | chr10:116276803 | Wald ratio                | 1  | 0.018  | 0.058 | 7.544E-01 | 0.976 | cis | Hospitalized COVID-19 |
| 11530_37  | HEM3                      | Porphobilinogen deaminase                                                      | P08397 | HMB3     | chr11:119084866 | Wald ratio                | 1  | -0.062 | 0.197 | 7.545E-01 | 0.976 | cis | Hospitalized COVID-19 |
| 9772_153  | NLGN2:ECD                 | Neurologin-2:Extracellular domain                                              | Q8NF24 | NLGN2    | chr17:7404874   | Inverse variance weighted | 2  | 0.026  | 0.083 | 7.546E-01 | 0.976 | cis | Hospitalized COVID-19 |
| 6207_10   | prosaposin                | Prosaposin                                                                     | P07602 | PSAP     | chr10:71851251  | Inverse variance weighted | 3  | 0.010  | 0.033 | 7.552E-01 | 0.976 | cis | Hospitalized COVID-19 |
| 8028_22   | SPINK5                    | Serine protease inhibitor Kazal-type 5                                         | Q9N038 | SPINK5   | chr5:148025683  | Wald ratio                | 1  | 0.023  | 0.075 | 7.577E-01 | 0.976 | cis | Hospitalized COVID-19 |
| 5637_81   | NTNG1                     | Netrin-G1                                                                      | Q9Y212 | NTNG1    | chr1:107140007  | Inverse variance weighted | 9  | 0.006  | 0.020 | 7.592E-01 | 0.976 | cis | Hospitalized COVID-19 |
| 2771_35   | IGFBP-1                   | Insulin-like growth factor-binding protein 1                                   | P08833 | IGFBP1   | chr7:45888360   | Wald ratio                | 1  | 0.042  | 0.136 | 7.593E-01 | 0.976 | cis | Hospitalized COVID-19 |
| 5657_28   | SIA4A                     | CMP-N-acetylneuraminate-beta-galactosamide-alpha-2,3-sialyltransferase 1       | Q11201 | ST3GAL1  | chr8:133571940  | Inverse variance weighted | 2  | -0.017 | 0.055 | 7.595E-01 | 0.976 | cis | Hospitalized COVID-19 |
| 18413_24  | ARL4D                     | ADP-ribosylation factor-like protein 4D                                        | P49703 | ARL4D    | chr17:43398993  | Wald ratio                | 1  | 0.058  | 0.189 | 7.600E-01 | 0.976 | cis | Hospitalized COVID-19 |
| 9326_33   | ITI heavy chain H2        | Inter-alpha-trypsin inhibitor heavy chain H2                                   | P19823 | ITH2     | chr10:7703316   | Inverse variance weighted | 9  | 0.007  | 0.024 | 7.604E-01 | 0.976 | cis | Hospitalized COVID-19 |
| 19154_41  | Protease nexin I          | Glia-derived nexin                                                             | P07093 | SERPINE2 | chr2:224039318  | Inverse variance weighted | 8  | -0.007 | 0.023 | 7.619E-01 | 0.976 | cis | Hospitalized COVID-19 |
| 2780_35   | Lactoferrin               | Lactotransferrin                                                               | P02788 | LTf      | chr3:46485234   | Inverse variance weighted | 3  | 0.034  | 0.112 | 7.622E-01 | 0.976 | cis | Hospitalized COVID-19 |
| 18340_2   | Proteasome beta chain     | Proteasome subunit beta type-4                                                 | P28070 | P5MB4    | chr1:151399560  | Inverse variance weighted | 4  | -0.010 | 0.033 | 7.625E-01 | 0.976 | cis | Hospitalized COVID-19 |
| 6255_74   | CPXM1                     | Probable carboxypeptidase X1                                                   | Q96M33 | CPXM1    | chr20:2800627   | Inverse variance weighted | 5  | -0.012 | 0.038 | 7.628E-01 | 0.976 | cis | Hospitalized COVID-19 |
| 9383_24   | CH3L2                     | Chitinase-3-like protein 2                                                     | Q15782 | CH3L2    | chr1:111200771  | Wald ratio                | 1  | 0.052  | 0.172 | 7.635E-01 | 0.976 | cis | Hospitalized COVID-19 |
| 9337_43   | TKN1                      | Protachykinin-1                                                                | P20366 | TAC1     | chr7:97732084   | Inverse variance weighted | 3  | 0.015  | 0.049 | 7.638E-01 | 0.976 | cis | Hospitalized COVID-19 |
| 16288_17  | EPHA4                     | Ephrin type-A receptor 4                                                       | P54764 | EPHA4    | chr2:221574202  | Inverse variance weighted | 3  | 0.029  | 0.098 | 7.641E-01 | 0.976 | cis | Hospitalized COVID-19 |
| 8932_1    | ENTP6                     | Ectonucleoside triphosphate diphosphohydrolase 6                               | O75354 | ENTP6    | chr20:25195693  | Wald ratio                | 1  | 0.033  | 0.109 | 7.644E-01 | 0.976 | cis | Hospitalized COVID-19 |
| 12560_9   | NTSC                      | 5'(3')-deoxyribonucleotidase, cytosolic type                                   | Q8TCD5 | NTSC     | chr17:75131757  | Inverse variance weighted | 5  | -0.008 | 0.025 | 7.654E-01 | 0.976 | cis | Hospitalized COVID-19 |
| 12659_13  | GTPB9                     | Obg-like ATPase 1                                                              | Q9NTK5 | OLA1     | chr2:174248599  | Wald ratio                | 1  | -0.023 | 0.076 | 7.655E-01 | 0.976 | cis | Hospitalized COVID-19 |
| 6388_21   | CC126                     | Coiled-coil domain-containing protein 126                                      | Q96E4A | CCDC126  | chr7:23597382   | Inverse variance weighted | 4  | 0.010  | 0.034 | 7.655E-01 | 0.976 | cis | Hospitalized COVID-19 |
| 5532_53   | bFGF-R                    | Fibroblast growth factor receptor 1                                            | P11362 | GDFR1    | chr8:38468834   | Inverse variance weighted | 2  | -0.030 | 0.101 | 7.656E-01 | 0.976 | cis | Hospitalized COVID-19 |
| 15370_5   | BOLA1                     | BolA-like protein 1                                                            | Q9Y3E2 | BOLA1    | chr1:149887890  | Inverse variance weighted | 2  | 0.011  | 0.039 | 7.667E-01 | 0.976 | cis | Hospitalized COVID-19 |
| 18408_26  | ARF4                      | ADP-ribosylation factor 4                                                      | P18085 | ARF4     | chr3:57598220   | Wald ratio                | 1  | 0.041  | 0.139 | 7.681E-01 | 0.976 | cis | Hospitalized COVID-19 |
| 15579_26  | ENPP6                     | Ectonucleotide pyrophosphatase/phosphodiesterase family member 6               | Q6UWR7 | ENPP6    | chr4:184221230  | Wald ratio                | 1  | 0.056  | 0.190 | 7.684E-01 | 0.976 | cis | Hospitalized COVID-19 |
| 5076_53   | EPHA4                     | Ephrin type-A receptor 10                                                      | Q5J2Y3 | EPHA10   | chr1:37765133   | Wald ratio                | 1  | -0.042 | 0.145 | 7.711E-01 | 0.976 | cis | Hospitalized COVID-19 |
| 4929_55   | SHBG                      | Sex hormone-binding globulin                                                   | P04278 | SHBG     | chr17:7613946   | Inverse variance weighted | 2  | 0.030  | 0.102 | 7.714E-01 | 0.976 | cis | Hospitalized COVID-19 |
| 8243_55   | TAT1                      | Serine protease inhibitor Kazal-type 1                                         | P00995 | SPINK1   | chr5:147831671  | Inverse variance weighted | 2  | 0.032  | 0.111 | 7.714E-01 | 0.976 | cis | Hospitalized COVID-19 |
| 16908_5   | OMGP                      | Oligodendrocyte-myelin glycoprotein                                            | P23515 | OMG      | chr17:31297539  | Wald ratio                | 1  | -0.044 | 0.150 | 7.716E-01 | 0.976 | cis | Hospitalized COVID-19 |
| 4435_66   | ENPP7                     | Ectonucleotide pyrophosphatase/phosphodiesterase family member 7               | Q6UWV6 | ENPP7    | chr17:79730943  | Inverse variance weighted | 9  | 0.007  | 0.026 | 7.716E-01 | 0.976 | cis | Hospitalized COVID-19 |
| 17331_138 | KREM1                     | Kremen protein 1                                                               | Q96MU8 | KREMEN1  | chr22:29073035  | Inverse variance weighted | 3  | -0.016 | 0.054 | 7.717E-01 | 0.976 | cis | Hospitalized COVID-19 |
| 8469_41   | IGFBP-2                   | Insulin-like growth factor-binding protein 2                                   | P18065 | IGFBP2   | chr2:216632828  | Inverse variance weighted | 2  | -0.059 | 0.203 | 7.719E-01 | 0.976 | cis | Hospitalized COVID-19 |
| 8969_49   | CD14                      | Monocyte differentiation antigen CD14                                          | P08571 | CD14     | chr5:140633700  | Wald ratio                | 1  | -0.077 | 0.265 | 7.721E-01 | 0.976 | cis | Hospitalized COVID-19 |
| 7141_21   | MGT4B                     | Alpha-1,3-mannosyl-glycoprotein 4-beta-N-acetylglucosaminyltransferase B       | Q9UQ53 | MGT4B    | chr5:179806952  | Inverse variance weighted | 4  | -0.010 | 0.033 | 7.724E-01 | 0.976 | cis | Hospitalized COVID-19 |
| 3391_10   | PK3CG                     | Phosphatidylinositol 4,5-bisphosphate 3-kinase catalytic subunit gamma isoform | P48736 | PIK3CG   | chr7:106865278  | Wald ratio                | 1  | -0.057 | 0.197 | 7.730E-01 | 0.976 | cis | Hospitalized COVID-19 |
| 17408_2   | PMM1                      | Phosphomannomutase 1                                                           | Q92871 | PMM1     | chr22:41589871  | Wald ratio                | 1  | 0.057  | 0.197 | 7.745E-01 | 0.976 | cis | Hospitalized COVID-19 |
| 4971_1    | CATZ                      | Cathepsin Z                                                                    | Q9UBR2 | CTSZ     | chr20:59008238  | Inverse variance weighted | 5  | -0.009 | 0.033 | 7.749E-01 | 0.976 | cis | Hospitalized COVID-19 |
| 13624_17  | NADK                      | NAD kinase                                                                     | O95544 | NADK     | chr1:1780457    | Wald ratio                | 1  | -0.022 | 0.079 | 7.757E-01 | 0.976 | cis | Hospitalized COVID-19 |
| 4337_49   | CRP                       | C-reactive protein                                                             | P02741 | CRP      | chr1:159714589  | Inverse variance weighted | 2  | -0.016 | 0.058 | 7.760E-01 | 0.976 | cis | Hospitalized COVID-19 |
| 12657_2   | FCL                       | GDP-L-fucose synthase                                                          | Q13630 | GFUS     | chr8:143618048  | Wald ratio                | 1  | 0.069  | 0.243 | 7.761E-01 | 0.976 | cis | Hospitalized COVID-19 |
| 10514_5   | PGD2 synthase             | Prostaglandin-H2 D-isomerase                                                   | P41222 | PTGD05   | chr9:136975092  | Wald ratio                | 1  | 0.065  | 0.229 | 7.764E-01 | 0.976 | cis | Hospitalized COVID-19 |
| 19289_29  | DCUP                      | Uroporphyrinogen decarboxylase                                                 | P06132 | UROD     | chr1:45010950   | Inverse variance weighted | 3  | 0.011  | 0.040 | 7.772E-01 | 0.976 | cis | Hospitalized COVID-19 |
| 4209_60   | DRG-1                     | Vacuolar protein sorting-associated protein VTA1 homolog                       | Q9NPF9 | VTA1     | chr6:142147162  | Wald ratio                | 1  | 0.054  | 0.192 | 7.773E-01 | 0.976 | cis | Hospitalized COVID-19 |
| 17764_108 | RHOC                      | Rho-related GTP-binding protein RHOC                                           | P08134 | RHOC     | chr1:112707434  | Wald ratio                | 1  | 0.027  | 0.094 | 7.775E-01 | 0.976 | cis | Hospitalized COVID-19 |
| 13983_27  | QOR                       | Quinone oxidoreductase                                                         | Q08257 | CRYZ     | chr1:74733408   | Inverse variance weighted | 7  | 0.007  | 0.026 | 7.783E-01 | 0.976 | cis | Hospitalized COVID-19 |
| 19130_81  | SPB8                      | Serpin B8                                                                      | P50452 | SERPINF8 | chr18:63970029  | Inverse variance weighted | 3  | -0.013 | 0.047 | 7.787E-01 | 0.976 | cis | Hospitalized COVID-19 |
| 10396_6   | Mcl-1                     | Induced myeloid leukemia cell differentiation protein Mcl-1                    | Q07820 | MCL1     | chr1:150579738  | Wald ratio                | 1  | 0.023  | 0.080 | 7.791E-01 | 0.976 | cis | Hospitalized COVID-19 |
| 10462_14  | INSL5                     | Insulin-like peptide INSL5                                                     | Q9Y5Q6 | INSL5    | chr1:66801276   | Wald ratio                | 1  | -0.051 | 0.181 | 7.797E-01 | 0.976 | cis | Hospitalized COVID-19 |
| 16825_20  | ATX3                      | Ataxin-3                                                                       | P54252 | ATXN3    | chr14:92106621  | Inverse variance weighted | 4  | 0.017  | 0.063 | 7.806E-01 | 0.976 | cis | Hospitalized COVID-19 |
| 4131_72   | Fibronectin               | Fibronectin                                                                    | P02751 | FN1      | chr2:215436073  | Inverse variance weighted | 2  | 0.062  | 0.222 | 7.808E-01 | 0.976 | cis | Hospitalized COVID-19 |
| 5713_9    | IFN-lambda 3              | Interferon lambda-3                                                            | Q8I029 | IFNL3    | chr19:39245250  | Wald ratio                | 1  | -0.060 | 0.218 | 7.823E-01 | 0.976 | cis | Hospitalized COVID-19 |
| 5737_61   | SEM4D                     | Semaphorin-4D                                                                  | Q92854 | SEMA4D   | chr9:89498130   | Inverse variance weighted | 6  | -0.011 | 0.041 | 7.829E-01 | 0.976 | cis | Hospitalized COVID-19 |
| 5731_1    | ISK6                      | Serine protease inhibitor Kazal-type 6                                         | Q6UWN8 | SPINK6   | chr5:148202794  | Inverse variance weighted | 9  | -0.008 | 0.030 | 7.837E-01 | 0.976 | cis | Hospitalized COVID-19 |
| 8289_8    | GNPMB:ECD                 | Transmembrane glycoprotein NMB:Extracellular domain                            | Q14956 | GNPMB    | chr7:23235967   | Inverse variance weighted | 5  | -0.011 | 0.040 | 7.840E-01 | 0.976 | cis | Hospitalized COVID-19 |
| 11606_22  | DNJB6                     | DnaJ homolog subfamily B member 6                                              | O75190 | DNAJB6   | chr7:157335381  | Wald ratio                | 1  | 0.055  | 0.202 | 7.850E-01 | 0.976 | cis | Hospitalized COVID-19 |

|           |                                  |                                                                        |        |          |                 |                           |    |        |       |           |       |     |                       |
|-----------|----------------------------------|------------------------------------------------------------------------|--------|----------|-----------------|---------------------------|----|--------|-------|-----------|-------|-----|-----------------------|
| 5682_13   | VASN                             | Vasorin                                                                | Q6EMK4 | VASN     | chr16:4371848   | Wald ratio                | 1  | 0.039  | 0.142 | 7.850E-01 | 0.976 | cis | Hospitalized COVID-19 |
| 7999_23   | CD39                             | Ectonucleoside triphosphate diphosphohydrolase 1                       | P49961 | ENTPD1   | chr10:95711779  | Inverse variance weighted | 3  | 0.023  | 0.085 | 7.854E-01 | 0.976 | cis | Hospitalized COVID-19 |
| 7099_33   | FSTL5                            | Follistatin-related protein 5                                          | P48945 | FSTL5    | chr4:462164004  | Wald ratio                | 1  | 0.028  | 0.105 | 7.862E-01 | 0.976 | cis | Hospitalized COVID-19 |
| 3291_30   | CD23                             | Low affinity immunoglobulin epsilon Fc receptor                        | P06734 | FCER2    | chr19:7702146   | Inverse variance weighted | 7  | 0.011  | 0.040 | 7.866E-01 | 0.976 | cis | Hospitalized COVID-19 |
| 4984_83   | Esterase D                       | S-formylglutathione hydrolase                                          | P10768 | ESD      | chr13:46797420  | Inverse variance weighted | 3  | -0.011 | 0.042 | 7.878E-01 | 0.977 | cis | Hospitalized COVID-19 |
| 7551_33   | LRC32                            | Leucine-rich repeat-containing protein 32                              | Q14392 | LRRCC3   | chr11:76670747  | Wald ratio                | 1  | -0.043 | 0.162 | 7.886E-01 | 0.977 | cis | Hospitalized COVID-19 |
| 2381_52   | CS                               | Complement C5                                                          | P01031 | C5       | chr9:121075195  | Inverse variance weighted | 2  | 0.041  | 0.154 | 7.907E-01 | 0.977 | cis | Hospitalized COVID-19 |
| 9294_45   | MFAF2                            | Microfibrillar-associated protein 2                                    | P55001 | MFAF2    | chr1:16980632   | Inverse variance weighted | 2  | -0.045 | 0.169 | 7.909E-01 | 0.977 | cis | Hospitalized COVID-19 |
| 18280_29  | DTD2                             | Putative D-tyrosyl-tRNA(Tyr) deacylase 2                               | Q96FN9 | DTD2     | chr14:31457506  | Inverse variance weighted | 2  | -0.023 | 0.088 | 7.916E-01 | 0.977 | cis | Hospitalized COVID-19 |
| 17712_7   | ID1                              | Isopentenyl-diphosphate Delta-isomerase 1                              | Q13907 | ID1      | chr10:1049119   | Wald ratio                | 1  | -0.039 | 0.147 | 7.921E-01 | 0.977 | cis | Hospitalized COVID-19 |
| 8660_5    | OLFL3                            | Olfactomedin-like protein 3                                            | Q9NRN5 | OLFML3   | chr1:113979391  | Inverse variance weighted | 2  | 0.026  | 0.100 | 7.928E-01 | 0.977 | cis | Hospitalized COVID-19 |
| 3313_21   | FCN2                             | Ficolin-2                                                              | Q15485 | FCN2     | chr9:134880810  | Inverse variance weighted | 3  | 0.018  | 0.068 | 7.928E-01 | 0.977 | cis | Hospitalized COVID-19 |
| 8476_11   | CgA                              | Chromogranin-A                                                         | P10645 | CHGA     | chr14:92923150  | Inverse variance weighted | 4  | 0.018  | 0.069 | 7.936E-01 | 0.977 | cis | Hospitalized COVID-19 |
| 6247_9    | SIRB1                            | Signal-regulatory protein beta-1                                       | O00241 | SIRPB1   | chr20:1620061   | Inverse variance weighted | 9  | 0.004  | 0.014 | 7.940E-01 | 0.977 | cis | Hospitalized COVID-19 |
| 6408_2    | INHBC                            | Inhibin beta C chain                                                   | P55103 | INHBC    | chr12:57434784  | Inverse variance weighted | 2  | 0.035  | 0.135 | 7.941E-01 | 0.977 | cis | Hospitalized COVID-19 |
| 11104_13  | YKL-40                           | Chitinase-3-like protein 1                                             | P36222 | CHI3L1   | chr1:203186704  | Inverse variance weighted | 7  | 0.004  | 0.017 | 7.941E-01 | 0.977 | cis | Hospitalized COVID-19 |
| 3607_71   | DKK3                             | Dickkopf-related protein 3                                             | Q9UBP4 | DKK3     | chr11:12009769  | Inverse variance weighted | 4  | -0.011 | 0.042 | 7.949E-01 | 0.977 | cis | Hospitalized COVID-19 |
| 6556_5    | ENPP5                            | Ectonucleotide pyrophosphatase/phosphodiesterase family member 5       | Q9UIA9 | ENPP5    | chr6:46170980   | Inverse variance weighted | 7  | -0.005 | 0.018 | 7.955E-01 | 0.977 | cis | Hospitalized COVID-19 |
| 19238_12  | GLNA                             | Glutamine synthetase                                                   | P15104 | GLUL     | chr1:182392206  | Wald ratio                | 1  | 0.054  | 0.208 | 7.960E-01 | 0.977 | cis | Hospitalized COVID-19 |
| 19213_1   | ISK4                             | Serine protease inhibitor Kazal-type 4                                 | O60575 | SPINK4   | chr9:33218365   | Wald ratio                | 1  | -0.013 | 0.050 | 7.979E-01 | 0.979 | cis | Hospitalized COVID-19 |
| 5231_79   | PCSK9                            | Proprotein convertase subtilisin/kexin type 9                          | Q8NB97 | PCSK9    | chr1:55039447   | Inverse variance weighted | 6  | 0.009  | 0.034 | 8.001E-01 | 0.981 | cis | Hospitalized COVID-19 |
| 2654_19   | TNF SR-I                         | Tumor necrosis factor receptor superfamily member 1A                   | P19438 | TNFRSF1A | chr12:6342114   | Wald ratio                | 1  | 0.023  | 0.090 | 8.013E-01 | 0.981 | cis | Hospitalized COVID-19 |
| 3191_50   | WFKN1                            | WAP, kazal, immunoglobulin, kunitz and NTR domain-containing protein 1 | Q96N28 | WFIKN1   | chr16:629239    | Inverse variance weighted | 2  | -0.019 | 0.075 | 8.015E-01 | 0.981 | cis | Hospitalized COVID-19 |
| 6947_4    | SIA10                            | Type 2 lactosamine alpha-2,3-sialyltransferase                         | Q9Y274 | ST3GAL6  | chr3:98732236   | Inverse variance weighted | 9  | -0.004 | 0.017 | 8.047E-01 | 0.983 | cis | Hospitalized COVID-19 |
| 2797_56   | Apo B                            | Apolipoprotein B                                                       | P04114 | APOB     | chr2:21044073   | Wald ratio                | 1  | -0.034 | 0.139 | 8.051E-01 | 0.983 | cis | Hospitalized COVID-19 |
| 18878_15  | GREM1                            | Gremlin-1                                                              | O60565 | GREM1    | chr15:32718004  | Inverse variance weighted | 8  | -0.005 | 0.022 | 8.054E-01 | 0.983 | cis | Hospitalized COVID-19 |
| 6392_7    | WISP-2                           | WNT1-inducible-signaling pathway protein 2                             | Q70676 | CN5      | chr20:44714844  | Inverse variance weighted | 5  | 0.010  | 0.042 | 8.059E-01 | 0.983 | cis | Hospitalized COVID-19 |
| 11441_11  | PYGL                             | Glycogen phosphorylase, liver form                                     | P06737 | PYGL     | chr14:50944483  | Inverse variance weighted | 2  | -0.020 | 0.083 | 8.065E-01 | 0.983 | cis | Hospitalized COVID-19 |
| 18882_7   | CS2N2                            | Calsynenin-2                                                           | Q9H4D0 | CLSTN2   | chr3:139935185  | Inverse variance weighted | 7  | -0.014 | 0.059 | 8.067E-01 | 0.983 | cis | Hospitalized COVID-19 |
| 18387_7   | suppression of tumorigenicity 13 | Hsc70-interacting protein                                              | P50502 | ST13     | chr22:40856639  | Wald ratio                | 1  | -0.047 | 0.194 | 8.071E-01 | 0.983 | cis | Hospitalized COVID-19 |
| 10835_25  | A4GCT                            | Alpha-1,4-N-acetylglucosaminyltransferase                              | Q9UNA3 | A4GNT    | chr3:138132390  | Wald ratio                | 1  | -0.038 | 0.157 | 8.076E-01 | 0.983 | cis | Hospitalized COVID-19 |
| 18289_16  | MIP-5                            | C-C motif chemokine 15                                                 | Q16663 | CCL15    | chr17:36001553  | Inverse variance weighted | 5  | 0.013  | 0.057 | 8.128E-01 | 0.989 | cis | Hospitalized COVID-19 |
| 17377_1   | Aldose reductase-like C3         | Aldo-keto reductase family 1 member C3                                 | P42330 | AKR1C3   | chr10:5035354   | Inverse variance weighted | 4  | -0.027 | 0.115 | 8.139E-01 | 0.989 | cis | Hospitalized COVID-19 |
| 8013_9    | LMAZL                            | VIP36-like protein                                                     | Q9H0V9 | LMAN2L   | chr2:96740064   | Inverse variance weighted | 2  | -0.026 | 0.112 | 8.160E-01 | 0.991 | cis | Hospitalized COVID-19 |
| 2632_5    | IL-12 Rb1                        | Interleukin-12 receptor subunit beta-1                                 | P42701 | IL12RB1  | chr19:18098944  | Wald ratio                | 1  | -0.030 | 0.130 | 8.169E-01 | 0.991 | cis | Hospitalized COVID-19 |
| 4564_2    | PLXC1                            | Plexin-C1                                                              | O60486 | PLXNC1   | chr12:94148577  | Inverse variance weighted | 11 | -0.004 | 0.016 | 8.174E-01 | 0.991 | cis | Hospitalized COVID-19 |
| 3803_10   | CYT D                            | Cystatin-D                                                             | P28325 | CTS5     | chr20:23879748  | Inverse variance weighted | 11 | -0.010 | 0.044 | 8.198E-01 | 0.993 | cis | Hospitalized COVID-19 |
| 9177_6    | FAM3B                            | Protein FAM3B                                                          | P58499 | FAM3B    | chr21:41304212  | Inverse variance weighted | 7  | 0.009  | 0.040 | 8.199E-01 | 0.993 | cis | Hospitalized COVID-19 |
| 3320_49   | IGFBP-7                          | Insulin-like growth factor-binding protein 7                           | Q16270 | IGFBP7   | chr4:57110385   | Inverse variance weighted | 5  | 0.011  | 0.051 | 8.220E-01 | 0.993 | cis | Hospitalized COVID-19 |
| 2737_22   | NovH                             | Protein NOV homolog                                                    | P48745 | CN3      | chr8:119416446  | Wald ratio                | 1  | 0.033  | 0.147 | 8.229E-01 | 0.993 | cis | Hospitalized COVID-19 |
| 18214_2   | GS40                             | Glutamate--cysteine ligase regulatory subunit                          | P48507 | GCLM     | chr1:93909456   | Inverse variance weighted | 2  | 0.027  | 0.121 | 8.231E-01 | 0.993 | cis | Hospitalized COVID-19 |
| 2789_26   | MMP-7                            | Matrilysin                                                             | Q09237 | MMP7     | chr11:102530750 | Inverse variance weighted | 4  | 0.011  | 0.049 | 8.237E-01 | 0.993 | cis | Hospitalized COVID-19 |
| 6998_106  | HAHA                             | Aspartyl/asparaginyl beta-hydroxylase                                  | Q12797 | ASPH     | chr8:61714640   | Inverse variance weighted | 2  | -0.023 | 0.103 | 8.240E-01 | 0.993 | cis | Hospitalized COVID-19 |
| 9595_11   | B4GT2                            | Beta-1,4-galactosyltransferase 2                                       | O60909 | B4GALT2  | chr1:43978943   | Inverse variance weighted | 4  | 0.008  | 0.037 | 8.252E-01 | 0.993 | cis | Hospitalized COVID-19 |
| 5457_5    | COLEC12                          | Collectin-12                                                           | Q5KU26 | Q5KU26   | chr18:500722    | Inverse variance weighted | 3  | -0.026 | 0.116 | 8.264E-01 | 0.993 | cis | Hospitalized COVID-19 |
| 19581_15  | IGFBP-5                          | Insulin-like growth factor-binding protein 5                           | P24593 | IGFBP5   | chr2:216695549  | Wald ratio                | 1  | -0.044 | 0.201 | 8.265E-01 | 0.993 | cis | Hospitalized COVID-19 |
| 8842_16   | GRM1C                            | GRAM domain-containing protein 1C                                      | Q8IY50 | GRAMD1C  | chr3:13828182   | Inverse variance weighted | 5  | -0.014 | 0.062 | 8.267E-01 | 0.993 | cis | Hospitalized COVID-19 |
| 16919_1   | ACBP                             | Acyl-CoA-binding protein                                               | P07108 | DBI      | chr2:211936924  | Inverse variance weighted | 2  | 0.010  | 0.047 | 8.268E-01 | 0.993 | cis | Hospitalized COVID-19 |
| 15384_15  | KLOTHO                           | Klotho                                                                 | Q9UEF7 | KL       | chr13:33016423  | Inverse variance weighted | 4  | 0.013  | 0.058 | 8.270E-01 | 0.993 | cis | Hospitalized COVID-19 |
| 8398_277  | RAR-responsive protein TIG1      | Retinoic acid receptor responder protein 1                             | P49788 | RARRES1  | chr3:158732489  | Inverse variance weighted | 6  | 0.007  | 0.033 | 8.278E-01 | 0.993 | cis | Hospitalized COVID-19 |
| 17325_10  | KGUA                             | Guanylate kinase                                                       | Q16774 | GUK1     | chr1:228139962  | Inverse variance weighted | 5  | -0.018 | 0.084 | 8.298E-01 | 0.993 | cis | Hospitalized COVID-19 |
| 12382_2   | DDX58                            | Probable ATP-dependent RNA helicase DDX58                              | O95786 | DDX58    | chr9:32526208   | Inverse variance weighted | 2  | -0.013 | 0.059 | 8.307E-01 | 0.993 | cis | Hospitalized COVID-19 |
| 16060_99  | NID2                             | Nidogen-2                                                              | Q14112 | NID2     | chr14:52069059  | Inverse variance weighted | 6  | 0.006  | 0.027 | 8.318E-01 | 0.993 | cis | Hospitalized COVID-19 |
| 4834_61   | Epithelial cell kinase           | Ephrin type-A receptor 2                                               | P29317 | EPHA2    | chr1:16156069   | Inverse variance weighted | 3  | -0.015 | 0.069 | 8.320E-01 | 0.993 | cis | Hospitalized COVID-19 |
| 11187_11  | CL12A                            | C-type lectin domain family 12 member A                                | Q5QG29 | CLEC12A  | chr12:9951316   | Inverse variance weighted | 6  | 0.007  | 0.035 | 8.339E-01 | 0.993 | cis | Hospitalized COVID-19 |
| 6544_33   | NELL1                            | Protein kinase C-binding protein NELL1                                 | Q92832 | NELL1    | chr11:20669551  | Inverse variance weighted | 8  | -0.005 | 0.026 | 8.343E-01 | 0.993 | cis | Hospitalized COVID-19 |
| 8916_32   | STIM1:CD                         | Stromal interaction molecule 1:Cytoplasmic domain                      | Q13586 | STIM1    | chr11:3854527   | Wald ratio                | 1  | -0.023 | 0.110 | 8.346E-01 | 0.993 | cis | Hospitalized COVID-19 |
| 16057_6   | IGF-II receptor                  | Cation-independent mannose-6-phosphate receptor                        | P11717 | IGF2R    | chr6:159969082  | Inverse variance weighted | 6  | -0.008 | 0.040 | 8.351E-01 | 0.993 | cis | Hospitalized COVID-19 |
| 9832_33   | HGD                              | Homogentisate 1,2-dioxygenase                                          | Q93099 | HGD      | chr3:120682269  | Inverse variance weighted | 2  | -0.029 | 0.139 | 8.374E-01 | 0.993 | cis | Hospitalized COVID-19 |
| 9021_1    | TIM-1                            | Hepatitis A virus cellular receptor 1                                  | Q96042 | HAVCR1   | chr5:157069396  | Inverse variance weighted | 6  | 0.007  | 0.032 | 8.374E-01 | 0.993 | cis | Hospitalized COVID-19 |
| 17694_32  | PSME2                            | Proteasome activator complex subunit 2                                 | Q9UL46 | PSME2    | chr14:24147570  | Inverse variance weighted | 3  | 0.012  | 0.057 | 8.383E-01 | 0.993 | cis | Hospitalized COVID-19 |
| 16773_29  | SCUB3                            | Signal peptide, CUB and EGF-like domain-containing protein 3           | Q8IX30 | SCUBE3   | chr6:35213956   | Inverse variance weighted | 3  | 0.009  | 0.046 | 8.393E-01 | 0.993 | cis | Hospitalized COVID-19 |
| 8364_74   | UST                              | Uronyl 2-sulfotransferase                                              | Q9Y2C2 | UST      | chr6:148747030  | Inverse variance weighted | 3  | 0.022  | 0.107 | 8.399E-01 | 0.993 | cis | Hospitalized COVID-19 |
| 9275_2    | Siglec-5                         | Sialic acid-binding Ig-like lectin 5                                   | O15389 | SIGLECS5 | chr19:51630401  | Wald ratio                | 1  | -0.039 | 0.195 | 8.404E-01 | 0.993 | cis | Hospitalized COVID-19 |
| 16616_137 | ENO8                             | Beta-enolase                                                           | P13929 | ENO3     | chr17:4948092   | Inverse variance weighted | 2  | 0.007  | 0.033 | 8.406E-01 | 0.993 | cis | Hospitalized COVID-19 |
| 15602_43  | IL-6 sRa                         | Interleukin-6 receptor subunit alpha                                   | P08887 | IL6R     | chr1:154405193  | Inverse variance weighted | 6  | -0.009 | 0.043 | 8.407E-01 | 0.993 | cis | Hospitalized COVID-19 |
| 6385_63   | VWA1                             | von Willebrand factor A domain-containing protein 1                    | Q6PC80 | VWA1     | chr1:1434861    | Inverse variance weighted | 5  | -0.011 | 0.055 | 8.408E-01 | 0.993 | cis | Hospitalized COVID-19 |
| 3499_77   | IL-17B                           | Interleukin-17B                                                        | Q9UHF5 | IL17B    | chr5:149404202  | Wald ratio                | 1  | 0.028  | 0.141 | 8.421E-01 | 0.993 | cis | Hospitalized COVID-19 |
| 5798_3    | BID                              | BH3-interacting domain death agonist                                   | P55957 | BID      | chr22:17747770  | Wald ratio                | 1  | 0.027  | 0.138 | 8.423E-01 | 0.993 | cis | Hospitalized COVID-19 |
| 12381_26  | CBR1                             | Carbonyl reductase [NADPH] 1                                           | P16152 | CBR1     | chr21:36069941  | Inverse variance weighted | 5  | 0.007  | 0.033 | 8.433E-01 | 0.993 | cis | Hospitalized COVID-19 |
| 4151_6    | Plasminogen                      | Plasminogen                                                            | P00747 | PLG      | chr6:160702194  | Inverse variance weighted | 3  | -0.028 | 0.142 | 8.434E-01 | 0.993 | cis | Hospitalized COVID-19 |
| 16753_46  | CO6A2                            | Collagen alpha-2(VI) chain                                             | P12110 | COL6A2   | chr21:46098112  | Inverse variance weighted | 4  | -0.013 | 0.065 | 8.446E-01 | 0.993 | cis | Hospitalized COVID-19 |
| 9470_15   | MET24                            | Methyltransferase-like protein 24                                      | Q5IXM2 | METTL24  | chr6:110358349  | Inverse variance weighted | 4  | -0.016 | 0.080 | 8.455E-01 | 0.993 | cis | Hospitalized COVID-19 |
| 4546_27   | EMR2                             | Adhesion G protein-coupled receptor E2                                 | Q9UHX3 | ADGRE2   | chr19:14778560  | Inverse variance weighted | 5  | -0.008 | 0.041 | 8.457E-01 | 0.993 | cis | Hospitalized COVID-19 |
| 5085_18   | IL-20 Ra                         | Interleukin-20 receptor subunit alpha                                  | Q9UHF4 | IL20RA   | chr6:137045180  | Wald ratio                | 1  | 0.041  | 0.209 | 8.461E-01 | 0.993 | cis | Hospitalized COVID-19 |
| 3474_19   | Thrombospondin-1                 | Thrombospondin-1                                                       | P07996 | THBS1    | chr15:39581079  | Wald ratio                | 1  | 0.042  | 0.215 | 8.463E-01 | 0.993 | cis | Hospitalized COVID-19 |
| 11514_196 | CD59                             | CD59 glycoprotein                                                      | P13987 | CD59     | chr11:33736479  | Inverse variance weighted | 3  | -0.012 | 0.062 | 8.470E-01 | 0.993 | cis | Hospitalized COVID-19 |
| 8983_7    | GOLM1                            | Golgi membrane protein 1                                               | Q8NB14 | GOLM1    | chr9:86100173   | Wald ratio                | 1  | -0.044 | 0.229 | 8.483E-01 | 0.993 | cis | Hospitalized COVID-19 |

|           |                      |                                                                                                |        |          |                 |                           |    |        |       |           |       |     |                       |
|-----------|----------------------|------------------------------------------------------------------------------------------------|--------|----------|-----------------|---------------------------|----|--------|-------|-----------|-------|-----|-----------------------|
| 6713_4    | LRP11                | Low-density lipoprotein receptor-related protein 11                                            | Q86V24 | LRP11    | chr6:149864359  | Inverse variance weighted | 8  | 0.006  | 0.029 | 8.488E-01 | 0.993 | cis | Hospitalized COVID-19 |
| 8309_12   | HYAL1                | Hyaluronidase-1                                                                                | Q12794 | HYAL1    | chr3:50312381   | Inverse variance weighted | 2  | 0.030  | 0.156 | 8.489E-01 | 0.993 | cis | Hospitalized COVID-19 |
| 18243_9   | Cytidylate kinase    | UMP-CMP kinase                                                                                 | P30085 | CMPK1    | chr1:47333790   | Wald ratio                | 1  | 0.025  | 0.131 | 8.490E-01 | 0.993 | cis | Hospitalized COVID-19 |
| 9216_100  | PLXB2                | Plexin-B2                                                                                      | O15031 | PLXNB2   | chr22:50307646  | Inverse variance weighted | 5  | -0.006 | 0.033 | 8.495E-01 | 0.993 | cis | Hospitalized COVID-19 |
| 7227_75   | COCH                 | Cochlin                                                                                        | O43405 | COCH     | chr14:30874514  | Inverse variance weighted | 4  | -0.009 | 0.046 | 8.498E-01 | 0.993 | cis | Hospitalized COVID-19 |
| 2778_10   | IL-22                | Interleukin-22                                                                                 | Q9GX26 | IL22     | chr12:68253604  | Wald ratio                | 1  | 0.033  | 0.177 | 8.510E-01 | 0.993 | cis | Hospitalized COVID-19 |
| 5060_62   | B7-H1                | Programmed cell death 1 ligand 1                                                               | Q9NZ07 | CD274    | chr9:5450503    | Inverse variance weighted | 2  | 0.018  | 0.096 | 8.512E-01 | 0.993 | cis | Hospitalized COVID-19 |
| 18819_21  | PPIC                 | Peptidyl-prolyl cis-trans isomerase C                                                          | P45877 | PPIC     | chr5:123036725  | Inverse variance weighted | 3  | 0.005  | 0.026 | 8.514E-01 | 0.993 | cis | Hospitalized COVID-19 |
| 17706_4   | PPR1A                | Protein phosphatase 1 regulatory subunit 1A                                                    | Q13522 | PPP1R1A  | chr12:54588659  | Wald ratio                | 1  | -0.037 | 0.196 | 8.514E-01 | 0.993 | cis | Hospitalized COVID-19 |
| 18183_3   | ARH                  | Low density lipoprotein receptor adaptor protein 1                                             | Q5SW96 | LDLRAP1  | chr1:25543606   | Inverse variance weighted | 2  | -0.021 | 0.112 | 8.516E-01 | 0.993 | cis | Hospitalized COVID-19 |
| 6086_15   | CRDL2                | Chordin-like protein 2                                                                         | Q6WN34 | CHRDLD   | chr11:74731426  | Inverse variance weighted | 5  | 0.006  | 0.035 | 8.521E-01 | 0.993 | cis | Hospitalized COVID-19 |
| 17332_3   | ARHL2                | Poly(ADP-ribose) glycohydrolase ARH3                                                           | Q9NX46 | ADPRS    | chr1:36088892   | Inverse variance weighted | 3  | -0.013 | 0.070 | 8.529E-01 | 0.993 | cis | Hospitalized COVID-19 |
| 3343_3    | Aminoacylase-1       | Aminoacylase-1                                                                                 | Q03154 | ACY1     | chr3:51983340   | Wald ratio                | 1  | 0.011  | 0.057 | 8.530E-01 | 0.993 | cis | Hospitalized COVID-19 |
| 5704_74   | Granzyme M           | Granzyme M                                                                                     | P51124 | GZMM     | chr19:544034    | Inverse variance weighted | 2  | 0.035  | 0.191 | 8.533E-01 | 0.993 | cis | Hospitalized COVID-19 |
| 3336_50   | TFPI                 | Tissue factor pathway inhibitor                                                                | P10646 | TFPI     | chr2:187565760  | Wald ratio                | 1  | -0.023 | 0.126 | 8.534E-01 | 0.993 | cis | Hospitalized COVID-19 |
| 5090_49   | ILT-2                | Leukocyte immunoglobulin-like receptor subfamily B member 1                                    | Q8NHL6 | LILRB1   | chr19:54617158  | Inverse variance weighted | 7  | -0.006 | 0.032 | 8.535E-01 | 0.993 | cis | Hospitalized COVID-19 |
| 3033_57   | Galectin-2           | Galectin-2                                                                                     | P05162 | LGALS2   | chr22:37582616  | Inverse variance weighted | 2  | 0.037  | 0.199 | 8.539E-01 | 0.993 | cis | Hospitalized COVID-19 |
| 2836_68   | Lipocalin 2          | Neutrophil gelatinase-associated lipocalin                                                     | P80188 | LCN2     | chr9:128149071  | Wald ratio                | 1  | 0.028  | 0.151 | 8.543E-01 | 0.993 | cis | Hospitalized COVID-19 |
| 9350_3    | FSTL4                | Follistatin-related protein 4                                                                  | Q6MZW2 | FSTL4    | chr5:133612541  | Inverse variance weighted | 2  | -0.024 | 0.129 | 8.548E-01 | 0.993 | cis | Hospitalized COVID-19 |
| 12662_82  | ECH1                 | Delta(3,5)-Delta(2,4)-dienoyl-CoA isomerase, mitochondrial                                     | Q13011 | ECH1     | chr19:38831841  | Inverse variance weighted | 2  | 0.006  | 0.034 | 8.549E-01 | 0.993 | cis | Hospitalized COVID-19 |
| 11351_233 | NHEJ1                | Non-homologous end-joining factor 1                                                            | Q9H9Q4 | NHEJ1    | chr2:219160869  | Inverse variance weighted | 3  | 0.016  | 0.086 | 8.563E-01 | 0.993 | cis | Hospitalized COVID-19 |
| 13112_179 | FSTL1                | Follistatin-related protein 1                                                                  | Q12841 | FSTL1    | chr3:120450993  | Inverse variance weighted | 2  | -0.017 | 0.096 | 8.570E-01 | 0.993 | cis | Hospitalized COVID-19 |
| 6416_8    | GKN2                 | Gastrokine-2                                                                                   | Q86XP6 | GKN2     | chr2:68952893   | Inverse variance weighted | 4  | 0.006  | 0.031 | 8.572E-01 | 0.993 | cis | Hospitalized COVID-19 |
| 3050_7    | VWF                  | von Willebrand factor                                                                          | P04275 | VWF      | chr12:6124770   | Inverse variance weighted | 4  | 0.021  | 0.119 | 8.574E-01 | 0.993 | cis | Hospitalized COVID-19 |
| 15453_3   | a1-Microglobulin     | Alpha-1-microglobulin                                                                          | P02760 | AMBPG    | chr9:114078328  | Inverse variance weighted | 2  | 0.027  | 0.151 | 8.586E-01 | 0.993 | cis | Hospitalized COVID-19 |
| 3007_7    | Siglec-9             | Sialic acid-binding Ig-like lectin 9                                                           | Q9Y336 | SIGLEC9  | chr19:51124906  | Inverse variance weighted | 6  | -0.007 | 0.037 | 8.590E-01 | 0.993 | cis | Hospitalized COVID-19 |
| 3166_92   | Siglec-3             | Myeloid cell surface antigen CD33                                                              | P20138 | CD33     | chr19:51225064  | Inverse variance weighted | 6  | 0.004  | 0.022 | 8.604E-01 | 0.994 | cis | Hospitalized COVID-19 |
| 15686_49  | INHBC                | Inhibin beta C chain                                                                           | P55103 | INHBC    | chr12:57434784  | Inverse variance weighted | 14 | -0.003 | 0.019 | 8.613E-01 | 0.994 | cis | Hospitalized COVID-19 |
| 14100_63  | C1QC                 | Complement C1q subcomponent subunit C                                                          | P02747 | C1QC     | chr1:22643014   | Inverse variance weighted | 9  | 0.005  | 0.028 | 8.620E-01 | 0.994 | cis | Hospitalized COVID-19 |
| 16079_2   | TEC                  | Tyrosine-protein kinase Tec                                                                    | P42680 | TEC      | chr4:48269838   | Inverse variance weighted | 2  | 0.033  | 0.192 | 8.620E-01 | 0.994 | cis | Hospitalized COVID-19 |
| 2999_6    | LSAMP                | Limbic system-associated membrane protein                                                      | Q13449 | LSAMP    | chr3:117139389  | Inverse variance weighted | 4  | 0.011  | 0.062 | 8.631E-01 | 0.994 | cis | Hospitalized COVID-19 |
| 15610_72  | LAP                  | Cytosol aminopeptidase                                                                         | P28838 | LAP3     | chr4:17577198   | Wald ratio                | 1  | 0.035  | 0.205 | 8.633E-01 | 0.994 | cis | Hospitalized COVID-19 |
| 11109_56  | SVEP1:Sushi 15-18    | Sushi, von Willebrand factor type A, EGF and pentraxin domain-containing protein 1:Sushi 15-18 | Q4LDE5 | SVEP1    | chr9:110579880  | Inverse variance weighted | 4  | 0.018  | 0.105 | 8.646E-01 | 0.995 | cis | Hospitalized COVID-19 |
| 15324_58  | Ferritin light chain | Ferritin light chain                                                                           | P02792 | FTL      | chr19:48965309  | Wald ratio                | 1  | 0.034  | 0.203 | 8.656E-01 | 0.995 | cis | Hospitalized COVID-19 |
| 13116_25  | CD177                | CD177 antigen                                                                                  | Q8N6Q3 | CD177    | chr19:43353686  | Inverse variance weighted | 8  | -0.004 | 0.027 | 8.682E-01 | 0.997 | cis | Hospitalized COVID-19 |
| 13465_5   | CCP1                 | Calciopressin-1                                                                                | P53805 | RCAN1    | chr21:34615113  | Wald ratio                | 1  | 0.028  | 0.171 | 8.683E-01 | 0.997 | cis | Hospitalized COVID-19 |
| 13544_9   | HMH41                | Rho GTPase-activating protein 45                                                               | Q92619 | ARHGA45  | chr19:1065923   | Wald ratio                | 1  | 0.013  | 0.079 | 8.687E-01 | 0.997 | cis | Hospitalized COVID-19 |
| 17384_110 | K6PF                 | ATP-dependent 6-phosphofructokinase, muscle type                                               | P08237 | PFKM     | chr12:48105139  | Wald ratio                | 1  | 0.017  | 0.103 | 8.690E-01 | 0.997 | cis | Hospitalized COVID-19 |
| 10815_2   | HABP4                | Intracellular hyaluronan-binding protein 4                                                     | QJ3V50 | HABP4    | chr9:96450169   | Inverse variance weighted | 3  | -0.006 | 0.040 | 8.715E-01 | 0.998 | cis | Hospitalized COVID-19 |
| 4374_45   | MIC-1                | Growth/differentiation factor 15                                                               | Q99988 | GDF15    | chr19:18374731  | Inverse variance weighted | 7  | -0.005 | 0.029 | 8.715E-01 | 0.998 | cis | Hospitalized COVID-19 |
| 16609_106 | KIRR2                | Kin of IRRE-like protein 2                                                                     | Q6UWL6 | KIRREL2  | chr19:35855861  | Inverse variance weighted | 5  | -0.006 | 0.035 | 8.725E-01 | 0.998 | cis | Hospitalized COVID-19 |
| 10818_36  | ASM                  | Sphingomyelin phosphodiesterase                                                                | P17405 | SMPD1    | chr11:6390440   | Inverse variance weighted | 5  | 0.004  | 0.028 | 8.735E-01 | 0.998 | cis | Hospitalized COVID-19 |
| 16853_5   | NRK1                 | Nicotinamide riboside kinase 1                                                                 | Q9NWW6 | NMRK1    | chr9:75088217   | Inverse variance weighted | 2  | 0.010  | 0.062 | 8.743E-01 | 0.998 | cis | Hospitalized COVID-19 |
| 3419_49   | CAMK2D               | Calcium/calmodulin-dependent protein kinase type II subunit delta                              | Q13557 | CAMK2D   | chr4:113761927  | Wald ratio                | 1  | 0.036  | 0.231 | 8.747E-01 | 0.998 | cis | Hospitalized COVID-19 |
| 10366_11  | PDGFRA               | Platelet-derived growth factor receptor alpha                                                  | P16234 | PDGFRA   | chr4:54229280   | Inverse variance weighted | 3  | -0.012 | 0.077 | 8.751E-01 | 0.998 | cis | Hospitalized COVID-19 |
| 9578_263  | MAN5A                | MAN5C domain-containing protein 4                                                              | AGNH57 | MAN5A4   | chr12:27780236  | Inverse variance weighted | 7  | -0.004 | 0.024 | 8.753E-01 | 0.998 | cis | Hospitalized COVID-19 |
| 9385_4    | GAA                  | Lysosomal alpha-glucosidase                                                                    | P10253 | GAA      | chr17:80101556  | Inverse variance weighted | 7  | -0.006 | 0.040 | 8.754E-01 | 0.998 | cis | Hospitalized COVID-19 |
| 3535_84   | DKK1                 | Dickkopf-related protein 1                                                                     | Q94907 | DKK1     | chr10:52314281  | Inverse variance weighted | 5  | -0.008 | 0.049 | 8.765E-01 | 0.998 | cis | Hospitalized COVID-19 |
| 8297_8    | DJIC10               | DnaJ homolog subfamily C member 10                                                             | Q8IXB1 | DNAIC10  | chr2:182716255  | Inverse variance weighted | 2  | 0.015  | 0.100 | 8.773E-01 | 0.998 | cis | Hospitalized COVID-19 |
| 18922_27  | CD68                 | Macrosialin                                                                                    | P34810 | CD68     | chr17:7579491   | Inverse variance weighted | 2  | 0.022  | 0.142 | 8.774E-01 | 0.998 | cis | Hospitalized COVID-19 |
| 16805_5   | PDESA                | cGMP-specific 3',5'-cyclic phosphodiesterase                                                   | O76074 | PDESA    | chr4:119628804  | Wald ratio                | 1  | -0.034 | 0.224 | 8.801E-01 | 0.999 | cis | Hospitalized COVID-19 |
| 13959_7   | LAP                  | Cytosol aminopeptidase                                                                         | P28838 | LAP3     | chr4:17577198   | Wald ratio                | 1  | -0.037 | 0.254 | 8.831E-01 | 0.999 | cis | Hospitalized COVID-19 |
| 9380_2    | sPLA(2)-XIII         | Group XIIIB secretory phospholipase A2-like protein                                            | Q9BX93 | PLA2G12B | chr10:72954806  | Wald ratio                | 1  | -0.018 | 0.120 | 8.836E-01 | 0.999 | cis | Hospitalized COVID-19 |
| 6425_87   | MMP19                | Matrix metalloproteinase-19                                                                    | Q99542 | MMP19    | chr12:55842966  | Inverse variance weighted | 3  | -0.011 | 0.076 | 8.841E-01 | 0.999 | cis | Hospitalized COVID-19 |
| 7218_87   | AT1B2                | Sodium/potassium-transporting ATPase subunit beta-2                                            | P14415 | ATP1B2   | chr17:7646627   | Inverse variance weighted | 3  | -0.010 | 0.069 | 8.874E-01 | 0.999 | cis | Hospitalized COVID-19 |
| 7110_2    | DJB11                | DnaJ homolog subfamily B member 11                                                             | Q9UBS4 | DNAJB11  | chr3:186567403  | Inverse variance weighted | 2  | -0.014 | 0.101 | 8.885E-01 | 0.999 | cis | Hospitalized COVID-19 |
| 5480_49   | RANTES               | C-C motif chemokine 5                                                                          | P13501 | CCL5     | chr17:35880793  | Inverse variance weighted | 2  | 0.016  | 0.117 | 8.890E-01 | 0.999 | cis | Hospitalized COVID-19 |
| 8885_6    | CA2D3                | Voltage-dependent calcium channel subunit alpha-2/delta-3                                      | Q8IZ58 | CACNA2D3 | chr3:54122547   | Inverse variance weighted | 5  | 0.007  | 0.051 | 8.906E-01 | 0.999 | cis | Hospitalized COVID-19 |
| 6485_59   | IGLL1                | Immunoglobulin lambda-like polypeptide 1                                                       | P15814 | IGLL1    | chr22:23580302  | Inverse variance weighted | 4  | -0.004 | 0.029 | 8.921E-01 | 0.999 | cis | Hospitalized COVID-19 |
| 8458_111  | a-Synuclein          | Alpha-synuclein                                                                                | P37840 | SNCA     | chr4:89838315   | Wald ratio                | 1  | -0.032 | 0.234 | 8.925E-01 | 0.999 | cis | Hospitalized COVID-19 |
| 9282_12   | CRIS2                | Cysteine-rich secretory protein 2                                                              | P16562 | CRISP2   | chr6:49713590   | Inverse variance weighted | 6  | -0.003 | 0.020 | 8.931E-01 | 0.999 | cis | Hospitalized COVID-19 |
| 8244_16   | FUT8                 | Alpha(1,6)-fucosyltransferase                                                                  | Q9BYC5 | FUT8     | chr14:65410592  | Inverse variance weighted | 10 | 0.003  | 0.022 | 8.947E-01 | 0.999 | cis | Hospitalized COVID-19 |
| 3043_49   | ON                   | SPARC                                                                                          | P09486 | SPARC    | chr5:151686975  | Wald ratio                | 1  | 0.027  | 0.203 | 8.955E-01 | 0.999 | cis | Hospitalized COVID-19 |
| 9863_1    | Tropomyosin 4        | Tropomyosin alpha-4 chain                                                                      | P67936 | TPM4     | chr19:16067021  | Wald ratio                | 1  | 0.018  | 0.137 | 8.956E-01 | 0.999 | cis | Hospitalized COVID-19 |
| 5621_64   | THSD1                | Thrombospondin type-1 domain-containing protein 1                                              | Q9NS62 | THSD1    | chr13:52416373  | Inverse variance weighted | 4  | 0.007  | 0.051 | 8.962E-01 | 0.999 | cis | Hospitalized COVID-19 |
| 4962_52   | ARMEL                | Cerebral dopamine neurotrophic factor                                                          | Q49AH0 | CNDF     | chr10:14838575  | Inverse variance weighted | 6  | -0.005 | 0.037 | 8.978E-01 | 0.999 | cis | Hospitalized COVID-19 |
| 7875_86   | PLEK                 | Pleckstrin                                                                                     | P08567 | PLEK     | chr2:68365282   | Inverse variance weighted | 2  | 0.010  | 0.077 | 8.984E-01 | 0.999 | cis | Hospitalized COVID-19 |
| 16892_23  | ENPP2                | Ectonucleotide pyrophosphatase/phosphodiesterase family member 2                               | Q13822 | ENPP2    | chr8:119673453  | Inverse variance weighted | 4  | 0.009  | 0.072 | 8.986E-01 | 0.999 | cis | Hospitalized COVID-19 |
| 19236_24  | TCP4                 | Activated RNA polymerase II transcriptional coactivator p15                                    | P53999 | SUB1     | chr3:32531633   | Wald ratio                | 1  | -0.028 | 0.221 | 8.989E-01 | 0.999 | cis | Hospitalized COVID-19 |
| 4496_60   | MMP-12               | Macrophage metalloelastase                                                                     | P39900 | MMP12    | chr11:102874982 | Inverse variance weighted | 7  | 0.002  | 0.019 | 9.011E-01 | 0.999 | cis | Hospitalized COVID-19 |
| 8687_26   | T106B                | Transmembrane protein 106B                                                                     | Q9NUM4 | TMEM106B | chr7:12211270   | Inverse variance weighted | 2  | -0.009 | 0.075 | 9.012E-01 | 0.999 | cis | Hospitalized COVID-19 |
| 14101_2   | CNTRF alpha          | Ciliary neurotrophic factor receptor subunit alpha                                             | P26992 | CNTRF    | chr9:34590140   | Inverse variance weighted | 2  | 0.009  | 0.075 | 9.013E-01 | 0.999 | cis | Hospitalized COVID-19 |
| 18330_7   | PGM2                 | Phosphoglucomutase-2                                                                           | Q9G603 | PGM2     | chr4:37826660   | Inverse variance weighted | 3  | -0.007 | 0.056 | 9.016E-01 | 0.999 | cis | Hospitalized COVID-19 |
| 7806_33   | B4GT7                | Beta-1,4-galactosyltransferase 7                                                               | Q9UBV7 | B4GALT7  | chr5:177600132  | Inverse variance weighted | 7  | 0.006  | 0.048 | 9.019E-01 | 0.999 | cis | Hospitalized COVID-19 |
| 4811_33   | ITI heavy chain H4   | Inter-alpha-trypsin inhibitor heavy chain H4                                                   | Q14624 | ITH4     | chr3:52830688   | Inverse variance weighted | 2  | -0.034 | 0.281 | 9.041E-01 | 0.999 | cis | Hospitalized COVID-19 |
| 13381_49  | B4GT1                | Beta-1,4-galactosyltransferase 1                                                               | P15291 | B4GALT1  | chr9:33167356   | Inverse variance weighted | 2  | 0.006  | 0.053 | 9.042E-01 | 0.999 | cis | Hospitalized COVID-19 |
| 9580_5    | Laminin gamma-2      | Laminin subunit gamma-2                                                                        | Q13753 | LAMC2    | chr1:183186238  | Inverse variance weighted | 4  | -0.004 | 0.034 | 9.048E-01 | 0.999 | cis | Hospitalized COVID-19 |
| 3727_35   | PYY                  | Peptide YY                                                                                     | P10082 | PYY      | chr17:44004469  | Wald ratio                | 1  | -0.017 | 0.141 | 9.049E-01 | 0.999 | cis | Hospitalized COVID-19 |

|           |                               |                                                                               |        |          |                 |                           |    |        |       |           |       |     |                       |
|-----------|-------------------------------|-------------------------------------------------------------------------------|--------|----------|-----------------|---------------------------|----|--------|-------|-----------|-------|-----|-----------------------|
| 10851_77  | IL27B                         | Interleukin-27 subunit beta                                                   | Q14213 | EBI3     | chr19:4229523   | Inverse variance weighted | 7  | 0.002  | 0.018 | 9.056E-01 | 0.999 | cis | Hospitalized COVID-19 |
| 3181_50   | Cathepsin S                   | Cathepsin S                                                                   | P25774 | CTSS     | chr1:150765957  | Inverse variance weighted | 3  | -0.003 | 0.028 | 9.060E-01 | 0.999 | cis | Hospitalized COVID-19 |
| 4469_78   | ST4S6                         | Carbohydrate sulfotransferase 15                                              | Q27LK5 | CHST15   | chr10:124093598 | Inverse variance weighted | 2  | 0.012  | 0.105 | 9.083E-01 | 0.999 | cis | Hospitalized COVID-19 |
| 3488_64   | Catalase                      | Catalase                                                                      | P04040 | CAT      | chr11:34438934  | Inverse variance weighted | 3  | -0.010 | 0.089 | 9.083E-01 | 0.999 | cis | Hospitalized COVID-19 |
| 3795_6    | ADAM 9                        | Disintegrin and metalloproteinase domain-containing protein 9                 | Q13443 | ADAM9    | chr8:38996754   | Wald ratio                | 1  | 0.029  | 0.256 | 9.093E-01 | 0.999 | cis | Hospitalized COVID-19 |
| 9388_18   | MCEE                          | Methylmalonyl-CoA epimerase, mitochondrial                                    | Q96PE7 | MCEE     | chr2:71130239   | Wald ratio                | 1  | -0.020 | 0.178 | 9.094E-01 | 0.999 | cis | Hospitalized COVID-19 |
| 18220_141 | SRA1                          | Steroid receptor RNA activator 1                                              | Q9HD15 | SRA1     | chr5:140557677  | Inverse variance weighted | 2  | -0.018 | 0.159 | 9.097E-01 | 0.999 | cis | Hospitalized COVID-19 |
| 17403_14  | acyl-Coenzyme A dehydrogenase | Short/branched chain specific acyl-CoA dehydrogenase, mitochondrial           | P45954 | ACAD5B   | chr10:123008979 | Inverse variance weighted | 2  | -0.025 | 0.226 | 9.119E-01 | 0.999 | cis | Hospitalized COVID-19 |
| 10445_20  | ApoM                          | Apolipoprotein M                                                              | O95445 | APOM     | chr6:31652416   | Inverse variance weighted | 2  | 0.006  | 0.055 | 9.126E-01 | 0.999 | cis | Hospitalized COVID-19 |
| 5656_53   | PP11                          | Poly(U)-specific endoribonuclease                                             | P21128 | ENDOU    | chr12:47725567  | Wald ratio                | 1  | -0.018 | 0.167 | 9.128E-01 | 0.999 | cis | Hospitalized COVID-19 |
| 18891_98  | GBP2                          | Guanylate-binding protein 2                                                   | P32456 | GBP2     | chr1:89150456   | Wald ratio                | 1  | -0.015 | 0.137 | 9.134E-01 | 0.999 | cis | Hospitalized COVID-19 |
| 8394_56   | RNase 2                       | Non-secretory ribonuclease                                                    | P10153 | RNASE2   | chr14:20955487  | Wald ratio                | 1  | -0.015 | 0.140 | 9.143E-01 | 0.999 | cis | Hospitalized COVID-19 |
| 15343_337 | Kininogen, HMW, Two Chain     | Kininogen, HMW, Two Chain                                                     | P01042 | KNG1     | chr3:186717348  | Inverse variance weighted | 4  | -0.011 | 0.101 | 9.150E-01 | 0.999 | cis | Hospitalized COVID-19 |
| 7856_51   | F151A                         | Protein FAM151A                                                               | Q8WW52 | FAM151A  | chr1:54623556   | Inverse variance weighted | 5  | 0.004  | 0.037 | 9.152E-01 | 0.999 | cis | Hospitalized COVID-19 |
| 17751_68  | CRBB1                         | Beta-crystallin B1                                                            | P53674 | CRYBB1   | chr22:26618027  | Wald ratio                | 1  | 0.006  | 0.055 | 9.164E-01 | 0.999 | cis | Hospitalized COVID-19 |
| 3403_1    | TPSB2                         | Tryptase beta-2                                                               | P20231 | TPSB2    | chr16:1230184   | Inverse variance weighted | 8  | -0.002 | 0.022 | 9.165E-01 | 0.999 | cis | Hospitalized COVID-19 |
| 9870_17   | SYWC                          | Tryptophan--tRNA ligase, cytoplasmic                                          | P23381 | WARS1    | chr14:100376805 | Inverse variance weighted | 2  | -0.006 | 0.058 | 9.178E-01 | 0.999 | cis | Hospitalized COVID-19 |
| 6904_14   | LRRT2                         | Leucine-rich repeat transmembrane neuronal protein 2                          | O43300 | LRRTM2   | chr5:138875368  | Wald ratio                | 1  | 0.013  | 0.125 | 9.193E-01 | 0.999 | cis | Hospitalized COVID-19 |
| 4160_49   | MMP-2                         | 72 kDa type IV collagenase                                                    | P08253 | MMP2     | chr16:55389700  | Inverse variance weighted | 2  | -0.010 | 0.095 | 9.198E-01 | 0.999 | cis | Hospitalized COVID-19 |
| 4721_54   | TFF3                          | Trefoil factor 3                                                              | Q07654 | TFF3     | chr21:42315409  | Inverse variance weighted | 3  | 0.011  | 0.110 | 9.199E-01 | 0.999 | cis | Hospitalized COVID-19 |
| 3435_53   | FN1.4                         | Fibronectin Fragment 4                                                        | P02751 | FN1      | chr2:215436073  | Wald ratio                | 1  | -0.031 | 0.313 | 9.203E-01 | 0.999 | cis | Hospitalized COVID-19 |
| 16607_78  | Gelsolin                      | Gelsolin                                                                      | P06396 | GSN      | chr9:121207794  | Inverse variance weighted | 2  | -0.015 | 0.156 | 9.215E-01 | 0.999 | cis | Hospitalized COVID-19 |
| 5363_51   | Semaphorin 3E                 | Semaphorin-3E                                                                 | O15041 | SEMA3E   | chr7:83649139   | Inverse variance weighted | 10 | -0.002 | 0.018 | 9.217E-01 | 0.999 | cis | Hospitalized COVID-19 |
| 5223_59   | GCKR                          | Glucokinase regulatory protein                                                | Q14397 | GCKR     | chr2:27496839   | Wald ratio                | 1  | 0.011  | 0.110 | 9.224E-01 | 0.999 | cis | Hospitalized COVID-19 |
| 7198_197  | FA20B                         | Glycosaminoglycan xylosylkinase                                               | O75063 | FAM20B   | chr1:179025804  | Inverse variance weighted | 2  | 0.010  | 0.106 | 9.227E-01 | 0.999 | cis | Hospitalized COVID-19 |
| 6920_1    | GFRAL                         | GDNF family receptor alpha-like                                               | Q6UXV0 | GFRAL    | chr6:55327469   | Inverse variance weighted | 3  | 0.005  | 0.051 | 9.239E-01 | 0.999 | cis | Hospitalized COVID-19 |
| 17151_84  | IRF-3                         | Interferon regulatory factor 3                                                | Q14653 | IRF3     | chr19:49665875  | Wald ratio                | 1  | 0.013  | 0.137 | 9.250E-01 | 0.999 | cis | Hospitalized COVID-19 |
| 6909_40   | MGA2T                         | Alpha-1,6-mannosyl-glycoprotein 2-beta-N-acetylglucosaminyltransferase        | Q10469 | MGA2T    | chr14:49620799  | Wald ratio                | 1  | -0.007 | 0.072 | 9.254E-01 | 0.999 | cis | Hospitalized COVID-19 |
| 5740_17   | ROBO1                         | Roundabout homolog 1                                                          | Q9Y6N7 | ROBO1    | chr3:79767998   | Inverse variance weighted | 3  | -0.007 | 0.078 | 9.255E-01 | 0.999 | cis | Hospitalized COVID-19 |
| 12859_33  | PECI                          | Enoyl-CoA delta isomerase 2, mitochondrial                                    | O75521 | ECI2     | chr6:4135597    | Inverse variance weighted | 3  | -0.006 | 0.060 | 9.261E-01 | 0.999 | cis | Hospitalized COVID-19 |
| 10666_7   | GNPTG                         | N-acetylglucosamine-1-phosphotransferase subunit gamma                        | Q9UJJ9 | GNPTG    | chr16:1351931   | Inverse variance weighted | 4  | -0.005 | 0.052 | 9.264E-01 | 0.999 | cis | Hospitalized COVID-19 |
| 15444_45  | SCCA2                         | Serpin B4                                                                     | P48594 | SERPINF4 | chr18:63644256  | Inverse variance weighted | 3  | -0.009 | 0.098 | 9.266E-01 | 0.999 | cis | Hospitalized COVID-19 |
| 8973_23   | FCRL4:ECD                     | Fc receptor-like protein 4:Extracellular domain                               | Q96PJ5 | FCRL4    | chr1:157598085  | Inverse variance weighted | 13 | -0.003 | 0.030 | 9.273E-01 | 0.999 | cis | Hospitalized COVID-19 |
| 8925_25   | RIR2B                         | Ribonucleoside-diphosphate reductase subunit M2 B                             | Q7L656 | RRM2B    | chr8:102238961  | Inverse variance weighted | 2  | 0.006  | 0.069 | 9.275E-01 | 0.999 | cis | Hospitalized COVID-19 |
| 3331_8    | RGMB                          | RGM domain family member B                                                    | Q6NW40 | RGMB     | chr5:98768650   | Inverse variance weighted | 3  | -0.005 | 0.058 | 9.286E-01 | 0.999 | cis | Hospitalized COVID-19 |
| 17698_15  | WBP2                          | VW domain-binding protein 2                                                   | Q96979 | WBP2     | chr17:75856507  | Wald ratio                | 1  | -0.020 | 0.222 | 9.289E-01 | 0.999 | cis | Hospitalized COVID-19 |
| 15522_2   | GAPR1                         | Golgi-associated plant pathogenesis-related protein 1                         | Q9H4G4 | GLIPR2   | chr9:36136536   | Inverse variance weighted | 2  | -0.003 | 0.039 | 9.291E-01 | 0.999 | cis | Hospitalized COVID-19 |
| 19124_9   | UBCP1                         | Ubiquitin-like domain-containing CTD phosphatase 1                            | Q8WVY7 | UBLCP1   | chr15:159263290 | Inverse variance weighted | 2  | 0.008  | 0.089 | 9.296E-01 | 0.999 | cis | Hospitalized COVID-19 |
| 3438_10   | FSTL3                         | Follistatin-related protein 3                                                 | O95633 | FSTL3    | chr19:676392    | Inverse variance weighted | 2  | 0.022  | 0.253 | 9.297E-01 | 0.999 | cis | Hospitalized COVID-19 |
| 16882_27  | PHP14                         | 14 kDa phosphohistidine phosphatase                                           | Q9NKR4 | PHPT1    | chr9:136848724  | Inverse variance weighted | 2  | 0.014  | 0.161 | 9.308E-01 | 0.999 | cis | Hospitalized COVID-19 |
| 5018_68   | Peroxioredoxin-6              | Peroxioredoxin-6                                                              | P30041 | PRDX6    | chr1:173477330  | Wald ratio                | 1  | -0.014 | 0.170 | 9.322E-01 | 0.999 | cis | Hospitalized COVID-19 |
| 8099_42   | SPON2                         | Spondin-2                                                                     | Q9BUDE | SPON2    | chr4:1208962    | Inverse variance weighted | 6  | -0.005 | 0.054 | 9.324E-01 | 0.999 | cis | Hospitalized COVID-19 |
| 6923_1    | PLOD2                         | Procollagen-lysine, 2-oxoglutarate 5-dioxygenase 2                            | O00469 | PLOD2    | chr3:146163725  | Inverse variance weighted | 2  | -0.011 | 0.133 | 9.330E-01 | 0.999 | cis | Hospitalized COVID-19 |
| 3852_19   | HSP 40                        | DnaJ homolog subfamily B member 1                                             | P25685 | DNAJB1   | chr19:14560391  | Wald ratio                | 1  | 0.018  | 0.214 | 9.336E-01 | 0.999 | cis | Hospitalized COVID-19 |
| 5703_26   | NOE1                          | Noelin                                                                        | Q99784 | OLFM1    | chr9:135075422  | Inverse variance weighted | 2  | 0.009  | 0.108 | 9.339E-01 | 0.999 | cis | Hospitalized COVID-19 |
| 17391_10  | SPF45                         | Splicing factor 45                                                            | Q96125 | RBM17    | chr10:6089034   | Inverse variance weighted | 2  | -0.004 | 0.048 | 9.341E-01 | 0.999 | cis | Hospitalized COVID-19 |
| 6375_75   | XXLT1                         | Xyloside xylosyltransferase 1                                                 | Q8NB16 | XXYL1    | chr3:195271159  | Inverse variance weighted | 2  | -0.004 | 0.046 | 9.346E-01 | 0.999 | cis | Hospitalized COVID-19 |
| 9565_6    | PAWR                          | PRKC apoptosis WT1 regulator protein                                          | Q96120 | PAWR     | chr12:79690964  | Wald ratio                | 1  | 0.019  | 0.229 | 9.352E-01 | 0.999 | cis | Hospitalized COVID-19 |
| 4232_19   | IGF1-sR                       | Insulin-like growth factor 1 receptor                                         | P08069 | IGF1R    | chr15:98648539  | Inverse variance weighted | 2  | 0.008  | 0.097 | 9.354E-01 | 0.999 | cis | Hospitalized COVID-19 |
| 8039_41   | F177A                         | Protein FAM177A1                                                              | Q8N128 | FAM177A1 | chr14:35045117  | Inverse variance weighted | 6  | 0.002  | 0.026 | 9.357E-01 | 0.999 | cis | Hospitalized COVID-19 |
| 15304_1   | PAP1                          | Regenerating islet-derived protein 3-alpha                                    | Q06141 | REG3A    | chr2:79159753   | Inverse variance weighted | 3  | 0.011  | 0.141 | 9.358E-01 | 0.999 | cis | Hospitalized COVID-19 |
| 12563_2   | TFIP8                         | Tumor necrosis factor alpha-induced protein 8                                 | O95379 | TNFAIP8  | chr5:119268692  | Inverse variance weighted | 2  | -0.005 | 0.066 | 9.374E-01 | 0.999 | cis | Hospitalized COVID-19 |
| 10565_19  | SLIK3                         | SLIT and NTRK-like protein 3                                                  | O94933 | SLITRK3  | chr3:165197109  | Inverse variance weighted | 3  | -0.003 | 0.033 | 9.375E-01 | 0.999 | cis | Hospitalized COVID-19 |
| 5680_54   | OBP2B                         | Odorant-binding protein 2b                                                    | Q9NP66 | OBP2B    | chr9:133209250  | Inverse variance weighted | 4  | -0.004 | 0.047 | 9.379E-01 | 0.999 | cis | Hospitalized COVID-19 |
| 17456_53  | GOLM1                         | Golgi membrane protein 1                                                      | Q8NB84 | GOLM1    | chr9:86100173   | Inverse variance weighted | 6  | -0.005 | 0.065 | 9.381E-01 | 0.999 | cis | Hospitalized COVID-19 |
| 3194_36   | GPVI                          | Platelet glycoprotein VI                                                      | Q9HCN6 | GP6      | chr19:55038264  | Inverse variance weighted | 2  | -0.003 | 0.038 | 9.384E-01 | 0.999 | cis | Hospitalized COVID-19 |
| 2436_49   | CXCL16, soluble               | C-X-C motif chemokine 16                                                      | Q9H2A7 | CXCL16   | chr17:4739928   | Inverse variance weighted | 3  | -0.004 | 0.053 | 9.388E-01 | 0.999 | cis | Hospitalized COVID-19 |
| 8351_17   | PRSS7                         | Serine protease 57                                                            | Q6UWY2 | PRSS57   | chr19:695498    | Inverse variance weighted | 6  | -0.003 | 0.040 | 9.388E-01 | 0.999 | cis | Hospitalized COVID-19 |
| 9829_91   | SULT 2A1                      | Bile salt sulfotransferase                                                    | Q06520 | SULT2A1  | chr19:47886315  | Wald ratio                | 1  | -0.005 | 0.065 | 9.389E-01 | 0.999 | cis | Hospitalized COVID-19 |
| 4996_66   | HRG                           | Histidine-rich glycoprotein                                                   | P04196 | HRG      | chr3:186660216  | Inverse variance weighted | 4  | 0.003  | 0.040 | 9.397E-01 | 0.999 | cis | Hospitalized COVID-19 |
| 14273_19  | PPCE                          | Prolyl endopeptidase                                                          | P48147 | PREP     | chr6:105454062  | Inverse variance weighted | 2  | 0.004  | 0.060 | 9.411E-01 | 0.999 | cis | Hospitalized COVID-19 |
| 19448_104 | UPP1                          | Uridine phosphorylase 1                                                       | P16831 | UPP1     | chr7:48088628   | Wald ratio                | 1  | -0.009 | 0.119 | 9.414E-01 | 0.999 | cis | Hospitalized COVID-19 |
| 18213_30  | UBE2F                         | NEED8-conjugating enzyme UBE2F                                                | O969M7 | UBE2F    | chr2:237968827  | Wald ratio                | 1  | -0.012 | 0.170 | 9.417E-01 | 0.999 | cis | Hospitalized COVID-19 |
| 18180_58  | RT41I                         | Reticulon-4-interacting protein 1, mitochondrial                              | Q8WWV3 | RTN4IP1  | chr6:106629498  | Wald ratio                | 1  | 0.012  | 0.168 | 9.419E-01 | 0.999 | cis | Hospitalized COVID-19 |
| 19637_9   | CRH                           | Corticotiberin                                                                | P06850 | CRH      | chr8:66178464   | Wald ratio                | 1  | -0.012 | 0.168 | 9.421E-01 | 0.999 | cis | Hospitalized COVID-19 |
| 7757_5    | DQA2                          | HLA class II histocompatibility antigen, DQ alpha 2 chain                     | P01906 | HLA-DQA2 | chr6:32741391   | Inverse variance weighted | 3  | 0.005  | 0.071 | 9.428E-01 | 0.999 | cis | Hospitalized COVID-19 |
| 15363_32  | Apo A-V                       | Apolipoprotein A-V                                                            | Q6Q788 | APOA5    | chr11:116792420 | Inverse variance weighted | 8  | -0.002 | 0.027 | 9.434E-01 | 0.999 | cis | Hospitalized COVID-19 |
| 7871_16   | T132A                         | Transmembrane protein 132A                                                    | Q241P5 | TMEM132A | chr11:60924460  | Inverse variance weighted | 6  | 0.002  | 0.025 | 9.436E-01 | 0.999 | cis | Hospitalized COVID-19 |
| 5256_86   | PDE5A                         | cGMP-specific 3',5'-cyclic phosphodiesterase                                  | O76074 | PDE5A    | chr4:119628804  | Inverse variance weighted | 3  | 0.009  | 0.125 | 9.437E-01 | 0.999 | cis | Hospitalized COVID-19 |
| 8465_52   | Cathepsin H                   | Cathepsin H                                                                   | P09668 | CTSH     | chr15:78949574  | Inverse variance weighted | 10 | -0.002 | 0.022 | 9.438E-01 | 0.999 | cis | Hospitalized COVID-19 |
| 8428_102  | NTRI                          | Neurotrophin                                                                  | Q9P121 | NTM      | chr11:131370478 | Inverse variance weighted | 4  | 0.006  | 0.090 | 9.438E-01 | 0.999 | cis | Hospitalized COVID-19 |
| 3024_18   | a2-Antiplasmin                | Alpha-2-antiplasmin                                                           | P08697 | SERPINF2 | chr17:1742836   | Inverse variance weighted | 3  | 0.004  | 0.064 | 9.443E-01 | 0.999 | cis | Hospitalized COVID-19 |
| 17802_4   | S1AS                          | Sialic acid synthase                                                          | Q9NR45 | NANS     | chr9:98056732   | Wald ratio                | 1  | 0.008  | 0.119 | 9.445E-01 | 0.999 | cis | Hospitalized COVID-19 |
| 11288_26  | SNTC                          | Cytosolic purine 5'-nucleotidase                                              | P49902 | NTSC2    | chr10:103277605 | Inverse variance weighted | 3  | 0.005  | 0.071 | 9.447E-01 | 0.999 | cis | Hospitalized COVID-19 |
| 11390_24  | Carbonic Anhydrase VIII       | Carbonic anhydrase-related protein                                            | P35219 | CA8      | chr8:60281400   | Inverse variance weighted | 6  | -0.002 | 0.031 | 9.450E-01 | 0.999 | cis | Hospitalized COVID-19 |
| 5116_62   | ROBO2                         | Roundabout homolog 2                                                          | Q9HCK4 | ROBO2    | chr3:75906695   | Wald ratio                | 1  | 0.016  | 0.232 | 9.455E-01 | 0.999 | cis | Hospitalized COVID-19 |
| 17161_1   | OST48                         | Dolichyl-diphosphooligosaccharide--protein glycosyltransferase 48 kDa subunit | P39656 | DDOST    | chr1:20661544   | Wald ratio                | 1  | 0.014  | 0.207 | 9.462E-01 | 0.999 | cis | Hospitalized COVID-19 |
| 9191_8    | Trefoil factor 2              | Trefoil factor 2                                                              | Q03403 | TFF2     | chr21:42350997  | Inverse variance weighted | 2  | 0.007  | 0.107 | 9.471E-01 | 0.999 | cis | Hospitalized COVID-19 |

|           |                                            |                                                                                              |        |          |                 |                           |    |        |       |           |       |     |                       |
|-----------|--------------------------------------------|----------------------------------------------------------------------------------------------|--------|----------|-----------------|---------------------------|----|--------|-------|-----------|-------|-----|-----------------------|
| 16872_248 | MAAI                                       | Maleylacetoacetate isomerase                                                                 | O43708 | GSTZ1    | chr14:77320996  | Inverse variance weighted | 8  | 0.001  | 0.015 | 9.483E-01 | 0.999 | cis | Hospitalized COVID-19 |
| 15495_9   | FOLR3                                      | Folate receptor gamma                                                                        | P41439 | FOLR3    | chr11:72114869  | Inverse variance weighted | 9  | 0.002  | 0.027 | 9.486E-01 | 0.999 | cis | Hospitalized COVID-19 |
| 5609_92   | F19A5                                      | Protein FAM19A5                                                                              | Q7Z5A7 | TAFAs    | chr22:48489553  | Wald ratio                | 1  | -0.014 | 0.222 | 9.506E-01 | 0.999 | cis | Hospitalized COVID-19 |
| 8274_64   | Syntaxin-7                                 | Syntaxin-7                                                                                   | O15400 | STX7     | chr6:132513198  | Wald ratio                | 1  | 0.005  | 0.087 | 9.510E-01 | 0.999 | cis | Hospitalized COVID-19 |
| 3041_55   | MRC2                                       | C-type mannose receptor 2                                                                    | Q9UBG0 | MRC2     | chr17:62627670  | Inverse variance weighted | 6  | -0.003 | 0.051 | 9.515E-01 | 0.999 | cis | Hospitalized COVID-19 |
| 15386_7   | FABPA                                      | Fatty acid-binding protein, adipocyte                                                        | P15090 | FABPA    | chr8:81483236   | Wald ratio                | 1  | 0.008  | 0.128 | 9.533E-01 | 0.999 | cis | Hospitalized COVID-19 |
| 4297_62   | Spodoin-1                                  | Spodoin-1                                                                                    | Q9HC86 | SPON1    | chr11:13962723  | Inverse variance weighted | 4  | 0.002  | 0.035 | 9.534E-01 | 0.999 | cis | Hospitalized COVID-19 |
| 8024_64   | TPST2                                      | Protein-tyrosine sulfotransferase 2                                                          | O60704 | TPST2    | chr22:26596717  | Inverse variance weighted | 2  | 0.007  | 0.117 | 9.537E-01 | 0.999 | cis | Hospitalized COVID-19 |
| 10561_5   | PGRP-I-alpha                               | Peptidoglycan recognition protein 3                                                          | Q96L89 | PGLYRP3  | chr1:153312952  | Wald ratio                | 1  | 0.012  | 0.214 | 9.544E-01 | 0.999 | cis | Hospitalized COVID-19 |
| 3728_52   | Secretin                                   | Secretin                                                                                     | P09683 | SCT      | chr11:627181    | Wald ratio                | 1  | 0.008  | 0.138 | 9.551E-01 | 0.999 | cis | Hospitalized COVID-19 |
| 3806_55   | EphA5                                      | Ephrin type-A receptor 5                                                                     | P54756 | EPHA5    | chr4:65670495   | Inverse variance weighted | 3  | -0.005 | 0.083 | 9.553E-01 | 0.999 | cis | Hospitalized COVID-19 |
| 19143_38  | NBSR2                                      | NADH-cytochrome b5 reductase 2                                                               | Q6BCY4 | CYBSR2   | chr11:7677222   | Inverse variance weighted | 6  | 0.004  | 0.080 | 9.554E-01 | 0.999 | cis | Hospitalized COVID-19 |
| 12457_10  | MTND                                       | 1,2-dihydroxy-3-keto-5-methylthiopentene dioxygenase                                         | Q9BV57 | AD11     | chr2:3519531    | Wald ratio                | 1  | -0.008 | 0.152 | 9.570E-01 | 0.999 | cis | Hospitalized COVID-19 |
| 18172_71  | ASF1A                                      | Histone chaperone ASF1A                                                                      | Q9Y294 | ASF1A    | chr6:118894152  | Wald ratio                | 1  | 0.005  | 0.096 | 9.570E-01 | 0.999 | cis | Hospitalized COVID-19 |
| 12008_3   | CD7                                        | T-cell antigen CD7                                                                           | P09564 | CD7      | chr17:82317608  | Inverse variance weighted | 4  | -0.006 | 0.113 | 9.574E-01 | 0.999 | cis | Hospitalized COVID-19 |
| 5029_3    | SEPR                                       | Prolyl endopeptidase FAP                                                                     | Q12884 | FAP      | chr2:162245151  | Inverse variance weighted | 5  | 0.004  | 0.074 | 9.575E-01 | 0.999 | cis | Hospitalized COVID-19 |
| 3323_37   | LRP8                                       | Low-density lipoprotein receptor-related protein 8                                           | Q14114 | LRP8     | chr1:53328469   | Inverse variance weighted | 2  | 0.003  | 0.051 | 9.579E-01 | 0.999 | cis | Hospitalized COVID-19 |
| 2831_29   | Kallikrein 11                              | Kallikrein-11                                                                                | Q9UBX7 | KLK11    | chr19:51028039  | Inverse variance weighted | 7  | -0.003 | 0.056 | 9.594E-01 | 0.999 | cis | Hospitalized COVID-19 |
| 4548_4    | Fucosyltransferase 3                       | Galactoside 3(4)-L-fucosyltransferase                                                        | P21217 | FUT3     | chr19:5851471   | Inverse variance weighted | 9  | 0.002  | 0.043 | 9.623E-01 | 0.999 | cis | Hospitalized COVID-19 |
| 15475_4   | PLTP                                       | Phospholipid transfer protein                                                                | P55058 | PLTP     | chr20:45912155  | Inverse variance weighted | 9  | 0.002  | 0.039 | 9.630E-01 | 0.999 | cis | Hospitalized COVID-19 |
| 12812_25  | ACYP2                                      | Acylphosphatase-2                                                                            | P14621 | ACYP2    | chr2:53970838   | Inverse variance weighted | 3  | -0.002 | 0.047 | 9.634E-01 | 0.999 | cis | Hospitalized COVID-19 |
| 4240_31   | M2-PK                                      | Pyruvate kinase PKM                                                                          | P14618 | PKM      | chr15:72231819  | Wald ratio                | 1  | 0.007  | 0.154 | 9.639E-01 | 0.999 | cis | Hospitalized COVID-19 |
| 18876_77  | CHST4                                      | Carbohydrate sulfotransferase 4                                                              | Q8NCG5 | CHST4    | chr16:71525233  | Wald ratio                | 1  | -0.010 | 0.235 | 9.651E-01 | 0.999 | cis | Hospitalized COVID-19 |
| 18307_71  | PPase 2                                    | Inorganic pyrophosphatase 2, mitochondrial                                                   | Q9H2U2 | PPA2     | chr4:105474067  | Wald ratio                | 1  | 0.006  | 0.129 | 9.652E-01 | 0.999 | cis | Hospitalized COVID-19 |
| 2851_63   | C5a                                        | C5a anaphylatoxin                                                                            | P01031 | C5       | chr9:1221075195 | Inverse variance weighted | 2  | 0.008  | 0.194 | 9.659E-01 | 0.999 | cis | Hospitalized COVID-19 |
| 6382_17   | MANBA                                      | Beta-mannosidase                                                                             | O00462 | MANBA    | chr4:102760994  | Inverse variance weighted | 5  | 0.002  | 0.055 | 9.659E-01 | 0.999 | cis | Hospitalized COVID-19 |
| 19135_5   | Cytosolic 5'-nucleotidase III-like protein | 7-methylguanosine phosphate-specific 5'-nucleotidase                                         | Q96977 | NTSC3B   | chr17:41836260  | Inverse variance weighted | 9  | -0.001 | 0.027 | 9.663E-01 | 0.999 | cis | Hospitalized COVID-19 |
| 7994_41   | ERO1B                                      | ERO1-like protein beta                                                                       | Q86Y88 | ERO1B    | chr1:236282019  | Inverse variance weighted | 2  | 0.002  | 0.056 | 9.666E-01 | 0.999 | cis | Hospitalized COVID-19 |
| 2811_27   | Angiotensin-1                              | Angiotensin-1                                                                                | Q15389 | ANGPT1   | chr8:107498055  | Wald ratio                | 1  | 0.006  | 0.153 | 9.670E-01 | 0.999 | cis | Hospitalized COVID-19 |
| 8974_172  | COFA1                                      | Collagen alpha-1(XV) chain                                                                   | P39059 | COL15A1  | chr9:98943179   | Inverse variance weighted | 4  | -0.002 | 0.045 | 9.672E-01 | 0.999 | cis | Hospitalized COVID-19 |
| 15300_66  | CC134                                      | Coiled-coil domain-containing protein 134                                                    | Q9H6E4 | CCDC134  | chr22:41800679  | Inverse variance weighted | 2  | -0.004 | 0.089 | 9.672E-01 | 0.999 | cis | Hospitalized COVID-19 |
| 5139_32   | UNC5H3                                     | Netrin receptor UNC5C                                                                        | O95185 | UNC5C    | chr4:95549206   | Inverse variance weighted | 3  | -0.002 | 0.055 | 9.690E-01 | 0.999 | cis | Hospitalized COVID-19 |
| 15626_223 | Perlecan                                   | Basement membrane-specific heparan sulfate proteoglycan core protein                         | P98160 | HSPG2    | chr1:21937310   | Inverse variance weighted | 4  | -0.001 | 0.038 | 9.696E-01 | 0.999 | cis | Hospitalized COVID-19 |
| 15326_64  | GBP1                                       | Guanylate-binding protein 1                                                                  | P32455 | GBP1     | chr1:89065360   | Inverse variance weighted | 2  | -0.002 | 0.054 | 9.696E-01 | 0.999 | cis | Hospitalized COVID-19 |
| 4413_3    | SLPI                                       | Antileukoprotease                                                                            | P03973 | SLPI     | chr20:45254564  | Wald ratio                | 1  | -0.008 | 0.221 | 9.699E-01 | 0.999 | cis | Hospitalized COVID-19 |
| 7945_10   | Semaphorin-6A                              | Semaphorin-6A                                                                                | Q9H2E6 | SEMA6A   | chr5:116574823  | Inverse variance weighted | 4  | 0.002  | 0.065 | 9.700E-01 | 0.999 | cis | Hospitalized COVID-19 |
| 18873_8   | CEAM8                                      | Carcinoembryonic antigen-related cell adhesion molecule 8                                    | P31997 | CEACAM8  | chr19:42595055  | Wald ratio                | 1  | -0.008 | 0.230 | 9.712E-01 | 0.999 | cis | Hospitalized COVID-19 |
| 11360_39  | RRM1                                       | Ribonucleoside-diphosphate reductase large subunit                                           | P23921 | RRM1     | chr11:4094707   | Wald ratio                | 1  | 0.007  | 0.197 | 9.722E-01 | 0.999 | cis | Hospitalized COVID-19 |
| 16561_9   | Alpha-1B-glycoprotein                      | Alpha-1B-glycoprotein                                                                        | P04217 | A1BG     | chr19:58353492  | Inverse variance weighted | 4  | 0.001  | 0.027 | 9.725E-01 | 0.999 | cis | Hospitalized COVID-19 |
| 15613_16  | LIPP                                       | Pancreatic triacylglycerol lipase                                                            | P16233 | PNLIP    | chr10:116545931 | Wald ratio                | 1  | -0.006 | 0.183 | 9.729E-01 | 0.999 | cis | Hospitalized COVID-19 |
| 4324_33   | CYTT                                       | Cystatin-SA                                                                                  | P09228 | CS2T     | chr20:23826729  | Inverse variance weighted | 5  | -0.003 | 0.079 | 9.732E-01 | 0.999 | cis | Hospitalized COVID-19 |
| 12549_33  | PTGD2                                      | Hematopoietic prostaglandin D synthase                                                       | O60760 | HPGD5    | chr4:94342876   | Inverse variance weighted | 9  | -0.001 | 0.021 | 9.739E-01 | 0.999 | cis | Hospitalized COVID-19 |
| 8958_51   | CHL1                                       | Neural cell adhesion molecule L1-like protein                                                | O00533 | CHL1     | chr3:196763     | Inverse variance weighted | 6  | -0.002 | 0.048 | 9.740E-01 | 0.999 | cis | Hospitalized COVID-19 |
| 2705_5    | TECK                                       | C-C motif chemokine 25                                                                       | O15444 | CCCL25   | chr19:8052318   | Inverse variance weighted | 11 | -0.001 | 0.025 | 9.744E-01 | 0.999 | cis | Hospitalized COVID-19 |
| 7947_19   | AP4AT                                      | AP-4 complex accessory subunit tepsin                                                        | Q96N21 | TEPSIN   | chr17:81239091  | Wald ratio                | 1  | 0.006  | 0.190 | 9.744E-01 | 0.999 | cis | Hospitalized COVID-19 |
| 14123_34  | GI24:ECD                                   | V-type immunoglobulin domain-containing suppressor of T-cell activation:Extracellular domain | Q9H7M9 | VSIR     | chr10:71773520  | Inverse variance weighted | 5  | 0.003  | 0.087 | 9.748E-01 | 0.999 | cis | Hospitalized COVID-19 |
| 5275_28   | VAV                                        | Proto-oncogene vav                                                                           | P15498 | VAV1     | chr19:6772708   | Wald ratio                | 1  | -0.006 | 0.185 | 9.748E-01 | 0.999 | cis | Hospitalized COVID-19 |
| 9313_27   | CBLN1                                      | Cerebellin-1                                                                                 | P23435 | CBLN1    | chr16:49281838  | Inverse variance weighted | 9  | 0.001  | 0.037 | 9.773E-01 | 0.999 | cis | Hospitalized COVID-19 |
| 3302_58   | CYTF                                       | Cystatin-F                                                                                   | O76096 | CS7T     | chr20:24949269  | Inverse variance weighted | 7  | 0.001  | 0.021 | 9.775E-01 | 0.999 | cis | Hospitalized COVID-19 |
| 9940_35   | DUS28                                      | Dual specificity phosphatase 28                                                              | Q4G0W2 | DUSP28   | chr2:240560054  | Inverse variance weighted | 2  | -0.002 | 0.065 | 9.785E-01 | 0.999 | cis | Hospitalized COVID-19 |
| 16292_288 | GIP                                        | Gastric inhibitory polypeptide                                                               | P09681 | GIP      | chr17:48968596  | Wald ratio                | 1  | -0.006 | 0.237 | 9.789E-01 | 0.999 | cis | Hospitalized COVID-19 |
| 12401_3   | STALP                                      | AMSH-like protease                                                                           | Q96FJ0 | STAMBPL1 | chr10:88879734  | Wald ratio                | 1  | -0.003 | 0.110 | 9.790E-01 | 0.999 | cis | Hospitalized COVID-19 |
| 17164_15  | annexin IV                                 | Annexin A4                                                                                   | P09525 | ANXA4    | chr2:69644425   | Inverse variance weighted | 2  | 0.002  | 0.073 | 9.796E-01 | 0.999 | cis | Hospitalized COVID-19 |
| 17343_6   | SNPH                                       | Syntrophin                                                                                   | O15079 | SNPH     | chr20:1266280   | Inverse variance weighted | 2  | -0.003 | 0.118 | 9.797E-01 | 0.999 | cis | Hospitalized COVID-19 |
| 5852_6    | S100A12                                    | Protein S100-A12                                                                             | R80511 | S100A12  | chr1:153375621  | Inverse variance weighted | 2  | -0.002 | 0.093 | 9.801E-01 | 0.999 | cis | Hospitalized COVID-19 |
| 5430_66   | SHPS1                                      | Tyrosine-protein phosphatase non-receptor type substrate 1                                   | P78324 | SIRPA    | chr20:1894167   | Inverse variance weighted | 9  | -0.001 | 0.026 | 9.805E-01 | 0.999 | cis | Hospitalized COVID-19 |
| 2860_19   | Karyopherin-a2                             | Importin subunit alpha-1                                                                     | P52292 | KPNA2    | chr17:68035636  | Wald ratio                | 1  | 0.005  | 0.205 | 9.805E-01 | 0.999 | cis | Hospitalized COVID-19 |
| 3280_49   | Aggrecan                                   | Aggrecan core protein                                                                        | P16112 | ACAN     | chr15:88803436  | Inverse variance weighted | 2  | -0.002 | 0.076 | 9.806E-01 | 0.999 | cis | Hospitalized COVID-19 |
| 6252_62   | Secretoglobin family 3A member 1           | Secretoglobin family 3A member 1                                                             | Q960R1 | SCGB3A1  | chr5:180591499  | Inverse variance weighted | 4  | 0.001  | 0.049 | 9.813E-01 | 0.999 | cis | Hospitalized COVID-19 |
| 9005_16   | PLXA1                                      | Plexin-A1                                                                                    | Q9UIW2 | PLXNA1   | chr3:126982693  | Inverse variance weighted | 3  | -0.001 | 0.047 | 9.817E-01 | 0.999 | cis | Hospitalized COVID-19 |
| 2730_58   | MICA                                       | MHC class I polypeptide-related sequence A                                                   | Q29983 | MICA     | chr6:31399784   | Inverse variance weighted | 12 | 0.001  | 0.029 | 9.823E-01 | 0.999 | cis | Hospitalized COVID-19 |
| 5456_59   | CNDP1                                      | Beta-Ala-His dipeptidase                                                                     | Q96KN2 | CNDP1    | chr18:74534500  | Inverse variance weighted | 6  | -0.001 | 0.042 | 9.823E-01 | 0.999 | cis | Hospitalized COVID-19 |
| 14047_78  | BDNF                                       | Brain-derived neurotrophic factor                                                            | P23560 | BDNF     | chr11:27722058  | Inverse variance weighted | 2  | -0.004 | 0.185 | 9.830E-01 | 0.999 | cis | Hospitalized COVID-19 |
| 18381_16  | ALDH-E2                                    | Aldehyde dehydrogenase, mitochondrial                                                        | P05091 | ALDH2    | chr12:111766887 | Wald ratio                | 1  | 0.003  | 0.133 | 9.835E-01 | 0.999 | cis | Hospitalized COVID-19 |
| 9314_9    | PSG5                                       | Pregnancy-specific beta-1-glycoprotein 5                                                     | Q15238 | PSG5     | chr19:43186536  | Inverse variance weighted | 3  | -0.002 | 0.098 | 9.840E-01 | 0.999 | cis | Hospitalized COVID-19 |
| 15587_20  | FOLR2                                      | Folate receptor beta                                                                         | P14207 | FOLR2    | chr11:72216601  | Wald ratio                | 1  | 0.002  | 0.087 | 9.843E-01 | 0.999 | cis | Hospitalized COVID-19 |
| 5105_2    | Nogo Receptor                              | Reticulon-4 receptor                                                                         | Q9B2R6 | RTN4R    | chr22:20283246  | Inverse variance weighted | 5  | -0.001 | 0.031 | 9.847E-01 | 0.999 | cis | Hospitalized COVID-19 |
| 6470_19   | fibulin 1                                  | Fibulin-1                                                                                    | P23142 | FBLN1    | chr22:45502238  | Inverse variance weighted | 3  | -0.001 | 0.068 | 9.854E-01 | 0.999 | cis | Hospitalized COVID-19 |
| 2966_65   | SCGF-beta                                  | Stem cell growth factor-beta                                                                 | Q9Y240 | CLEC11A  | chr19:50723364  | Wald ratio                | 1  | 0.005  | 0.281 | 9.854E-01 | 0.999 | cis | Hospitalized COVID-19 |
| 5867_60   | ARG1                                       | Arginase-1                                                                                   | P05089 | ARG1     | chr6:131470832  | Inverse variance weighted | 2  | 0.002  | 0.097 | 9.854E-01 | 0.999 | cis | Hospitalized COVID-19 |
| 5124_69   | sICAM-5                                    | Intercellular adhesion molecule 5                                                            | Q9UMF0 | ICAM5    | chr19:10289952  | Inverse variance weighted | 4  | 0.003  | 0.188 | 9.856E-01 | 0.999 | cis | Hospitalized COVID-19 |
| 12731_12  | PKHA7                                      | Pleckstrin homology domain-containing family A member 7                                      | Q6IO23 | PLEKHA7  | chr11:17014415  | Inverse variance weighted | 4  | 0.000  | 0.027 | 9.873E-01 | 0.999 | cis | Hospitalized COVID-19 |
| 5701_81   | Tetranectin                                | Tetranectin                                                                                  | P05452 | CLEC3B   | chr3:45001548   | Inverse variance weighted | 2  | -0.002 | 0.111 | 9.874E-01 | 0.999 | cis | Hospitalized COVID-19 |
| 2844_53   | sTie-1                                     | Tyrosine-protein kinase receptor Tie-1, soluble                                              | P35590 | TIE1     | chr1:43300982   | Inverse variance weighted | 4  | 0.001  | 0.045 | 9.880E-01 | 0.999 | cis | Hospitalized COVID-19 |
| 10605_22  | APMAP                                      | Adipocyte plasma membrane-associated protein                                                 | Q9HDC9 | APMAP    | chr20:24992751  | Wald ratio                | 1  | 0.003  | 0.179 | 9.885E-01 | 0.999 | cis | Hospitalized COVID-19 |
| 8225_86   | EPHB2                                      | Ephrin type-B receptor 2                                                                     | P29323 | EPHB2    | chr1:22710839   | Inverse variance weighted | 3  | -0.001 | 0.057 | 9.888E-01 | 0.999 | cis | Hospitalized COVID-19 |
| 14066_49  | MAGI2                                      | Membrane-associated guanylate kinase, WW and PDZ domain-containing protein 2                 | Q86UL8 | MAGI2    | chr7:79453667   | Inverse variance weighted | 6  | 0.000  | 0.023 | 9.894E-01 | 0.999 | cis | Hospitalized COVID-19 |
| 11266_8   | SELPL:ECD                                  | P-selectin glycoprotein ligand 1:Extracellular domain                                        | Q14242 | SEPLG    | chr12:108633894 | Inverse variance weighted | 2  | 0.001  | 0.041 | 9.895E-01 | 0.999 | cis | Hospitalized COVID-19 |

|           |                                 |                                                                         |        |          |                 |                           |    |        |       |           |       |     |                       |
|-----------|---------------------------------|-------------------------------------------------------------------------|--------|----------|-----------------|---------------------------|----|--------|-------|-----------|-------|-----|-----------------------|
| 6451_64   | ASPN                            | Asporin                                                                 | Q9BXN1 | ASPN     | chr9:92482506   | Inverse variance weighted | 8  | 0.001  | 0.040 | 9.895E-01 | 0.999 | cis | Hospitalized COVID-19 |
| 5803_24   | C3d                             | Complement C3d fragment                                                 | P01024 | C3       | chr19:6730562   | Wald ratio                | 1  | -0.002 | 0.188 | 9.896E-01 | 0.999 | cis | Hospitalized COVID-19 |
| 15542_19  | KCRU                            | Creatine kinase U-type, mitochondrial                                   | P12532 | CKMT1A   | chr15:43692886  | Wald ratio                | 1  | -0.001 | 0.087 | 9.899E-01 | 0.999 | cis | Hospitalized COVID-19 |
| 7810_20   | C1QTNF5                         | Complement C1q tumor necrosis factor-related protein 5                  | Q9BXJ0 | C1QTNF5  | chr11:119340940 | Inverse variance weighted | 2  | 0.001  | 0.077 | 9.916E-01 | 0.999 | cis | Hospitalized COVID-19 |
| 4499_21   | PDGF-AA                         | Platelet-derived growth factor subunit A                                | P04005 | PDGFA    | chr7:520296     | Inverse variance weighted | 3  | -0.001 | 0.126 | 9.919E-01 | 0.999 | cis | Hospitalized COVID-19 |
| 13125_45  | Vitronectin                     | Vitronectin                                                             | P04004 | VTN      | chr17:28373091  | Inverse variance weighted | 9  | 0.000  | 0.020 | 9.923E-01 | 0.999 | cis | Hospitalized COVID-19 |
| 16913_8   | RNT2                            | Ribonuclease T2                                                         | O00584 | RNASET2  | chr6:166957191  | Inverse variance weighted | 6  | 0.000  | 0.024 | 9.924E-01 | 0.999 | cis | Hospitalized COVID-19 |
| 13488_3   | ARFP1                           | Arfaptin-1                                                              | P53367 | ARFP1    | chr4:152779937  | Inverse variance weighted | 2  | -0.001 | 0.064 | 9.925E-01 | 0.999 | cis | Hospitalized COVID-19 |
| 15576_158 | ECP                             | Eosinophil cationic protein                                             | P12724 | RNASE3   | chr14:20891385  | Inverse variance weighted | 4  | 0.000  | 0.031 | 9.941E-01 | 0.999 | cis | Hospitalized COVID-19 |
| 8480_29   | FBLN3                           | EGF-containing fibulin-like extracellular matrix protein 1              | Q12805 | EFEMP1   | chr2:55924139   | Inverse variance weighted | 2  | 0.000  | 0.072 | 9.952E-01 | 0.999 | cis | Hospitalized COVID-19 |
| 16594_44  | FAIM1                           | Fas apoptotic inhibitory molecule 1                                     | Q9NVQ4 | FAIM     | chr3:138608606  | Inverse variance weighted | 7  | 0.000  | 0.050 | 9.952E-01 | 0.999 | cis | Hospitalized COVID-19 |
| 3309_2    | FCG2A                           | Low affinity immunoglobulin gamma Fc region receptor II-a               | P12318 | FCGR2A   | chr1:161505430  | Inverse variance weighted | 4  | 0.000  | 0.051 | 9.955E-01 | 0.999 | cis | Hospitalized COVID-19 |
| 3820_68   | MAPK2                           | MAP kinase-activated protein kinase 2                                   | P49137 | MAPKAPK2 | chr1:206684905  | Wald ratio                | 1  | 0.000  | 0.058 | 9.958E-01 | 0.999 | cis | Hospitalized COVID-19 |
| 4831_4    | sl-Selectin                     | L-Selectin                                                              | P14151 | SELL     | chr1:169711702  | Inverse variance weighted | 7  | 0.000  | 0.028 | 9.965E-01 | 0.999 | cis | Hospitalized COVID-19 |
| 3651_50   | VEGF sR2                        | Vascular endothelial growth factor receptor 2                           | P35968 | KDR      | chr4:55125595   | Inverse variance weighted | 3  | 0.000  | 0.026 | 9.975E-01 | 0.999 | cis | Hospitalized COVID-19 |
| 15511_37  | NPTXR                           | Neuronal pentraxin receptor                                             | O95502 | NPTXR    | chr22:38844028  | Inverse variance weighted | 7  | 0.000  | 0.030 | 9.979E-01 | 0.999 | cis | Hospitalized COVID-19 |
| 15644_1   | Biotinidase                     | Biotinidase                                                             | P43251 | BDT      | chr3:15601341   | Inverse variance weighted | 9  | 0.000  | 0.024 | 9.979E-01 | 0.999 | cis | Hospitalized COVID-19 |
| 2888_49   | C7                              | Complement component C7                                                 | P10643 | C7       | chr5:40909492   | Inverse variance weighted | 5  | 0.000  | 0.020 | 9.991E-01 | 0.999 | cis | Hospitalized COVID-19 |
| 15376_134 | CATE                            | Cathepsin E                                                             | P14091 | CTSE     | chr1:206023909  | Inverse variance weighted | 4  | 0.000  | 0.037 | 9.991E-01 | 0.999 | cis | Hospitalized COVID-19 |
| 10419_1   | SCAR5                           | Scavenger receptor class A member 5                                     | Q6ZMJ2 | SCAR5    | chr8:27992673   | Inverse variance weighted | 5  | 0.000  | 0.039 | 9.993E-01 | 0.999 | cis | Hospitalized COVID-19 |
| 9253_52   | BGAT                            | Histo-blood group ABO system transferase                                | P16442 | ABO      | chr9:133276024  | Inverse variance weighted | 12 | 0.075  | 0.010 | 5.433E-13 | 0.000 | cis | SARS-CoV-2 infection  |
| 17769_28  | PCNP                            | PEST proteolytic signal-containing nuclear protein                      | Q8WW12 | PCNP     | chr3:101574180  | Wald ratio                | 1  | -0.381 | 0.056 | 1.221E-11 | 0.000 | cis | SARS-CoV-2 infection  |
| 19365_11  | BCAT2                           | Branched-chain-amino-acid aminotransferase, mitochondrial               | O15382 | BCAT2    | chr19:48811029  | Wald ratio                | 1  | 0.141  | 0.035 | 7.358E-05 | 0.041 | cis | SARS-CoV-2 infection  |
| 13719_19  | PAK4                            | Serine/threonine-protein kinase PAK 4                                   | O96013 | PAK4     | chr19:39125770  | Wald ratio                | 1  | 0.365  | 0.103 | 3.656E-04 | 0.153 | cis | SARS-CoV-2 infection  |
| 17777_31  | SDSL                            | Serine dehydratase-like                                                 | Q96GA7 | SDSL     | chr12:113422380 | Inverse variance weighted | 6  | 0.057  | 0.018 | 1.080E-03 | 0.244 | cis | SARS-CoV-2 infection  |
| 15526_33  | GSHB                            | Glutathione synthetase                                                  | P48637 | GSS      | chr20:34956027  | Inverse variance weighted | 2  | 0.112  | 0.034 | 1.116E-03 | 0.244 | cis | SARS-CoV-2 infection  |
| 8480_29   | FBLN3                           | EGF-containing fibulin-like extracellular matrix protein 1              | Q12805 | EFEMP1   | chr2:55924139   | Inverse variance weighted | 2  | -0.114 | 0.035 | 1.144E-03 | 0.244 | cis | SARS-CoV-2 infection  |
| 9384_17   | Cathelicidin peptide            | Cathelicidin antimicrobial peptide                                      | P49913 | CAMP     | chr3:48223347   | Wald ratio                | 1  | 0.207  | 0.064 | 1.273E-03 | 0.244 | cis | SARS-CoV-2 infection  |
| 17697_2   | OVCA2                           | Esterase OVCA2                                                          | Q8WZ82 | OVCA2    | chr17:2042022   | Wald ratio                | 1  | 0.148  | 0.046 | 1.344E-03 | 0.244 | cis | SARS-CoV-2 infection  |
| 19129_15  | MTHFSO                          | Methylenetetrahydrofolate synthase domain-containing protein            | Q2M296 | MTHFSO   | chr16:86555235  | Inverse variance weighted | 5  | -0.046 | 0.014 | 1.459E-03 | 0.244 | cis | SARS-CoV-2 infection  |
| 17761_2   | NUDT5                           | ADP-sugar pyrophosphatase                                               | Q9UKK9 | NUDT5    | chr10:12196144  | Wald ratio                | 1  | -0.192 | 0.064 | 2.762E-03 | 0.411 | cis | SARS-CoV-2 infection  |
| 12656_1   | KLC1                            | Kinesin light chain 1                                                   | Q07866 | KLC1     | chr14:103561896 | Wald ratio                | 1  | 0.161  | 0.054 | 2.998E-03 | 0.411 | cis | SARS-CoV-2 infection  |
| 12437_18  | ULK3                            | Serine/threonine-protein kinase ULK3                                    | Q6PHR2 | ULK3     | chr15:74843346  | Wald ratio                | 1  | 0.257  | 0.087 | 3.311E-03 | 0.411 | cis | SARS-CoV-2 infection  |
| 4992_49   | GRN                             | Granulins                                                               | P28799 | GRN      | chr17:44345246  | Inverse variance weighted | 3  | -0.065 | 0.022 | 3.437E-03 | 0.411 | cis | SARS-CoV-2 infection  |
| 9916_146  | LRCA8:ECD                       | Leucine-rich repeat-containing protein 4B:Extracellular domain          | Q9NT99 | LRRC4B   | chr19:50568435  | Inverse variance weighted | 2  | -0.192 | 0.067 | 4.040E-03 | 0.450 | cis | SARS-CoV-2 infection  |
| 7757_5    | DQA2                            | HLA class II histocompatibility antigen, DQ alpha 2 chain               | P01906 | HLA-DQA2 | chr6:32741391   | Inverse variance weighted | 3  | -0.075 | 0.026 | 4.303E-03 | 0.450 | cis | SARS-CoV-2 infection  |
| 10015_119 | KCAB2                           | Voltage-gated potassium channel subunit beta-2                          | Q13303 | KCNA2    | chr1:5990927    | Inverse variance weighted | 2  | -0.181 | 0.064 | 4.683E-03 | 0.461 | cis | SARS-CoV-2 infection  |
| 19206_20  | 8ODP                            | 7,8-dihydro-8-oxoguanine triphosphatase                                 | P36639 | NUDT1    | chr7:2242226    | Wald ratio                | 1  | 0.131  | 0.048 | 6.217E-03 | 0.578 | cis | SARS-CoV-2 infection  |
| 6359_50   | AGO61                           | Protein O-linked-mannose beta-1,4-N-acetylglucosaminyltransferase 2     | Q8NAT1 | POMGN2   | chr3:43106085   | Inverse variance weighted | 4  | -0.049 | 0.018 | 6.585E-03 | 0.580 | cis | SARS-CoV-2 infection  |
| 15509_2   | NAG                             | Alpha-N-acetylglucosaminidase                                           | P54802 | NAGLU    | chr17:42536241  | Inverse variance weighted | 6  | 0.024  | 0.009 | 7.679E-03 | 0.628 | cis | SARS-CoV-2 infection  |
| 9092_33   | ANGL1:N-term                    | Angiopoietin-related protein 1:N-term                                   | O95841 | ANGPTL1  | chr1:178871077  | Wald ratio                | 1  | 0.249  | 0.094 | 8.065E-03 | 0.628 | cis | SARS-CoV-2 infection  |
| 10366_11  | PDGFRA                          | Platelet-derived growth factor receptor alpha                           | P16234 | PDGFRA   | chr4:54229280   | Inverse variance weighted | 3  | 0.116  | 0.044 | 8.355E-03 | 0.628 | cis | SARS-CoV-2 infection  |
| 10346_5   | STAT3                           | Signal transducer and activator of transcription 3                      | P40763 | STAT3    | chr17:42388540  | Inverse variance weighted | 2  | -0.099 | 0.038 | 8.908E-03 | 0.628 | cis | SARS-CoV-2 infection  |
| 17447_52  | SFRP4                           | Secreted frizzled-related protein 4                                     | Q6FHU7 | SFRP4    | chr7:38025695   | Inverse variance weighted | 2  | -0.055 | 0.021 | 9.457E-03 | 0.628 | cis | SARS-CoV-2 infection  |
| 5586_66   | MINP1                           | Multiple inositol polyphosphate phosphatase 1                           | Q9UNW1 | MINP1    | chr10:87504875  | Wald ratio                | 1  | 0.156  | 0.061 | 1.049E-02 | 0.628 | cis | SARS-CoV-2 infection  |
| 16915_153 | SEMA4A                          | Semaphorin-4A                                                           | Q9H351 | SEMA4A   | chr1:156147366  | Wald ratio                | 1  | -0.072 | 0.028 | 1.081E-02 | 0.628 | cis | SARS-CoV-2 infection  |
| 9638_2    | TIGIT                           | T-cell immunoreceptor with Ig and ITIM domains                          | Q495A1 | TIGIT    | chr3:114276913  | Wald ratio                | 1  | -0.161 | 0.063 | 1.088E-02 | 0.628 | cis | SARS-CoV-2 infection  |
| 5532_53   | bFGF-R                          | Fibroblast growth factor receptor 1                                     | P11362 | FGFR1    | chr8:38468834   | Inverse variance weighted | 2  | 0.113  | 0.045 | 1.204E-02 | 0.628 | cis | SARS-CoV-2 infection  |
| 3855_56   | Peroxiredoxin-1                 | Peroxiredoxin-1                                                         | Q06803 | PRDX1    | chr1:45542732   | Inverse variance weighted | 2  | -0.101 | 0.040 | 1.276E-02 | 0.628 | cis | SARS-CoV-2 infection  |
| 2890_59   | CCL28                           | C-C motif chemokine 28                                                  | Q9NRJ3 | CCL28    | chr5:43412391   | Wald ratio                | 1  | -0.217 | 0.087 | 1.293E-02 | 0.628 | cis | SARS-CoV-2 infection  |
| 11480_1   | Aldehyde dehydrogenase, class 3 | Aldehyde dehydrogenase, dimeric NADP-prefering                          | P30838 | ALDH3A1  | chr17:19748943  | Wald ratio                | 1  | -0.097 | 0.039 | 1.297E-02 | 0.628 | cis | SARS-CoV-2 infection  |
| 19376_74  | NNMT                            | Nicotinamide N-methyltransferase                                        | P40261 | NNMT     | chr11:114257787 | Wald ratio                | 1  | 0.199  | 0.080 | 1.303E-02 | 0.628 | cis | SARS-CoV-2 infection  |
| 3348_49   | BMP-1                           | Bone morphogenetic protein 1                                            | P13497 | BMP1     | chr8:22165140   | Wald ratio                | 1  | 0.183  | 0.074 | 1.311E-02 | 0.628 | cis | SARS-CoV-2 infection  |
| 4328_2    | BOC                             | Brother of CDO                                                          | Q9BWV1 | BOC      | chr3:113211003  | Inverse variance weighted | 5  | 0.050  | 0.020 | 1.326E-02 | 0.628 | cis | SARS-CoV-2 infection  |
| 7918_114  | Amylase, alpha 1A               | Alpha-amylase 1                                                         | P04745 | AMY1A    | chr1:103655760  | Inverse variance weighted | 11 | 0.041  | 0.017 | 1.332E-02 | 0.628 | cis | SARS-CoV-2 infection  |
| 15503_20  | Lefty-A                         | Left-right determination factor 2                                       | O00292 | LEFTY2   | chr1:225941383  | Inverse variance weighted | 10 | 0.028  | 0.011 | 1.372E-02 | 0.628 | cis | SARS-CoV-2 infection  |
| 15441_6   | SAP3                            | Ganglioside GM2 activator                                               | P17900 | GM2A     | chr5:151212150  | Inverse variance weighted | 3  | -0.040 | 0.016 | 1.391E-02 | 0.628 | cis | SARS-CoV-2 infection  |
| 9848_22   | Cyclin H                        | Cyclin-H                                                                | P51946 | CNHN     | chr5:87412930   | Wald ratio                | 1  | -0.141 | 0.058 | 1.513E-02 | 0.628 | cis | SARS-CoV-2 infection  |
| 18891_98  | GBP2                            | Guanylate-binding protein 2                                             | P32456 | GBP2     | chr1:89150456   | Wald ratio                | 1  | -0.163 | 0.067 | 1.520E-02 | 0.628 | cis | SARS-CoV-2 infection  |
| 13481_24  | TCEA2                           | Transcription elongation factor A protein 2                             | Q15560 | TCEA2    | chr20:64049836  | Wald ratio                | 1  | 0.081  | 0.033 | 1.522E-02 | 0.628 | cis | SARS-CoV-2 infection  |
| 2730_58   | MICA                            | MHC class I polypeptide-related sequence A                              | Q29983 | MICA     | chr6:31399784   | Inverse variance weighted | 12 | 0.023  | 0.009 | 1.673E-02 | 0.628 | cis | SARS-CoV-2 infection  |
| 12378_71  | TPSN                            | Tapasin                                                                 | O15533 | TAPBP    | chr6:33314284   | Inverse variance weighted | 5  | 0.023  | 0.009 | 1.720E-02 | 0.628 | cis | SARS-CoV-2 infection  |
| 7849_3    | Glutaminy cyclase               | Glutaminy-peptide cyclotransferase                                      | Q16769 | QPCT     | chr2:37342827   | Inverse variance weighted | 4  | -0.061 | 0.026 | 1.768E-02 | 0.628 | cis | SARS-CoV-2 infection  |
| 10534_40  | PARP:BRCT domain                | Poly [ADP-ribose] polymerase 1:BRCA1 C-terminal:BRCA1 C-terminus domain | P09874 | PARP1    | chr1:226408154  | Wald ratio                | 1  | -0.241 | 0.102 | 1.852E-02 | 0.628 | cis | SARS-CoV-2 infection  |
| 5628_21   | SEM3G                           | Semaphorin-3G                                                           | Q9NS98 | SEMA3G   | chr3:52445103   | Inverse variance weighted | 5  | 0.078  | 0.033 | 1.882E-02 | 0.628 | cis | SARS-CoV-2 infection  |
| 4498_62   | NCAM-120                        | Neural cell adhesion molecule 1, 120 kDa isoform                        | P13591 | NCAM1    | chr11:112961247 | Inverse variance weighted | 3  | -0.032 | 0.014 | 1.960E-02 | 0.628 | cis | SARS-CoV-2 infection  |
| 11302_237 | TENR                            | Tenascin-R                                                              | Q92752 | TNR      | chr1:175743616  | Wald ratio                | 1  | 0.085  | 0.036 | 1.987E-02 | 0.628 | cis | SARS-CoV-2 infection  |
| 9754_33   | Quinone reductase 2             | Ribosyldihydroxynicotinamide dehydrogenase [quinone]                    | P16083 | NQO2     | chr6:2987987    | Inverse variance weighted | 8  | 0.019  | 0.008 | 2.065E-02 | 0.628 | cis | SARS-CoV-2 infection  |
| 3617_80   | HGFA                            | Hepatocyte growth factor activator                                      | Q04756 | HGFA     | chr4:3441968    | Inverse variance weighted | 12 | 0.017  | 0.007 | 2.070E-02 | 0.628 | cis | SARS-CoV-2 infection  |
| 9017_58   | LPH                             | Lactase-phlorizin hydrolase                                             | P09848 | LCT      | chr2:135837184  | Inverse variance weighted | 4  | -0.017 | 0.007 | 2.083E-02 | 0.628 | cis | SARS-CoV-2 infection  |
| 3600_2    | Chitotriosidase-1               | Chitotriosidase-1                                                       | Q13231 | CHIT1    | chr1:203273641  | Inverse variance weighted | 6  | 0.020  | 0.009 | 2.095E-02 | 0.628 | cis | SARS-CoV-2 infection  |
| 4568_17   | SLK5                            | SLIT and NTRK-like protein 5                                            | O94991 | SLTRK5   | chr13:87671371  | Inverse variance weighted | 4  | 0.068  | 0.030 | 2.123E-02 | 0.628 | cis | SARS-CoV-2 infection  |
| 8859_51   | CAH11                           | Carbonic anhydrase-related protein 11                                   | O75493 | CA11     | chr19:48646187  | Wald ratio                | 1  | 0.103  | 0.045 | 2.172E-02 | 0.628 | cis | SARS-CoV-2 infection  |
| 5542_22   | NRP1                            | Neuropilin-1                                                            | O14786 | NRP1     | chr10:33336262  | Inverse variance weighted | 5  | -0.033 | 0.015 | 2.195E-02 | 0.628 | cis | SARS-CoV-2 infection  |
| 7140_1    | ELA2A                           | Chymotrypsin-like elastase family member 2A                             | P08217 | CELA2A   | chr1:15456728   | Wald ratio                | 1  | 0.119  | 0.052 | 2.240E-02 | 0.628 | cis | SARS-CoV-2 infection  |
| 5111_15   | NRX3B                           | Neurexin-3-beta                                                         | Q9HD05 | NRXN3    | chr14:78170373  | Inverse variance weighted | 2  | -0.166 | 0.073 | 2.249E-02 | 0.628 | cis | SARS-CoV-2 infection  |
| 3234_23   | URB                             | Coiled-coil domain-containing protein 80                                | Q76M96 | CDC80    | chr3:112649530  | Inverse variance weighted | 2  | -0.104 | 0.045 | 2.250E-02 | 0.628 | cis | SARS-CoV-2 infection  |
| 8814_33   | SAPL1                           | Proactivator polypeptide-like 1                                         | Q6NUJ1 | PSAPL1   | chr4:7434930    | Inverse variance weighted | 8  | 0.029  | 0.013 | 2.293E-02 | 0.628 | cis | SARS-CoV-2 infection  |

|           |                            |                                                            |        |          |                 |                           |    |        |       |           |       |     |                      |
|-----------|----------------------------|------------------------------------------------------------|--------|----------|-----------------|---------------------------|----|--------|-------|-----------|-------|-----|----------------------|
| 12356_65  | Sorcin                     | Sorcin                                                     | P30626 | SRI      | chr7:88226993   | Wald ratio                | 1  | -0.096 | 0.042 | 2.315E-02 | 0.628 | cis | SARS-CoV-2 infection |
| 15480_2   | VNN2                       | Vascular non-inflammatory molecule 2                       | O95498 | VNN2     | chr6:132763459  | Inverse variance weighted | 11 | 0.018  | 0.008 | 2.320E-02 | 0.628 | cis | SARS-CoV-2 infection |
| 8233_2    | ITIH5                      | Inter-alpha-trypsin inhibitor heavy chain H5               | Q86U02 | ITIH5    | chr10:7666998   | Inverse variance weighted | 8  | -0.026 | 0.012 | 2.348E-02 | 0.628 | cis | SARS-CoV-2 infection |
| 5128_53   | SLAF6                      | SLAM family member 6                                       | Q96DU3 | SLAMF6   | chr1:160523262  | Wald ratio                | 1  | -0.061 | 0.027 | 2.407E-02 | 0.628 | cis | SARS-CoV-2 infection |
| 2580_83   | Myeloperoxidase            | Myeloperoxidase                                            | P05164 | MPO      | chr17:58280935  | Inverse variance weighted | 7  | -0.031 | 0.014 | 2.431E-02 | 0.628 | cis | SARS-CoV-2 infection |
| 4479_14   | C1-Esterase Inhibitor      | Plasma protease C1 inhibitor                               | P05155 | SERPINC1 | chr11:57597387  | Inverse variance weighted | 6  | -0.025 | 0.011 | 2.454E-02 | 0.628 | cis | SARS-CoV-2 infection |
| 17680_12  | EPHB1                      | Ephrin type-B receptor 1                                   | P54762 | EPHB1    | chr3:134795260  | Inverse variance weighted | 3  | 0.031  | 0.014 | 2.473E-02 | 0.628 | cis | SARS-CoV-2 infection |
| 2615_60   | Ephrin-A5                  | Ephrin-A5                                                  | P52803 | EFNA5    | chr5:107670937  | Inverse variance weighted | 2  | 0.073  | 0.033 | 2.482E-02 | 0.628 | cis | SARS-CoV-2 infection |
| 11514_196 | CD59                       | CD59 glycoprotein                                          | P13987 | CD59     | chr11:33736479  | Inverse variance weighted | 3  | 0.055  | 0.025 | 2.545E-02 | 0.628 | cis | SARS-CoV-2 infection |
| 3773_15   | sTie-2                     | Angiotensin-1 receptor, soluble                            | Q02763 | TEK      | chr9:27109141   | Inverse variance weighted | 4  | 0.049  | 0.022 | 2.587E-02 | 0.628 | cis | SARS-CoV-2 infection |
| 10702_1   | COSA1                      | Collagen alpha-1(XVIII) chain                              | Q2U0Y9 | COL28A1  | chr7:7535873    | Wald ratio                | 1  | 0.228  | 0.103 | 2.665E-02 | 0.628 | cis | SARS-CoV-2 infection |
| 3339_33   | TSP2                       | Thrombospondin-2                                           | P35442 | THBS2    | chr6:169254050  | Inverse variance weighted | 7  | -0.026 | 0.012 | 2.690E-02 | 0.628 | cis | SARS-CoV-2 infection |
| 8956_96   | SREC-II:ECD                | Scavenger receptor class F member 2:Extracellular domain   | Q96GP6 | SCARF2   | chr22:20437826  | Wald ratio                | 1  | -0.099 | 0.045 | 2.693E-02 | 0.628 | cis | SARS-CoV-2 infection |
| 12449_16  | PPIH                       | Peptidyl-prolyl cis-trans isomerase H                      | O43447 | PPIH     | chr1:42658335   | Inverse variance weighted | 2  | 0.142  | 0.064 | 2.705E-02 | 0.628 | cis | SARS-CoV-2 infection |
| 13545_97  | EIF1A                      | Probable RNA-binding protein EIF1AD                        | Q8N9N8 | EIF1AD   | chr11:66002176  | Inverse variance weighted | 3  | 0.105  | 0.048 | 2.785E-02 | 0.638 | cis | SARS-CoV-2 infection |
| 19448_104 | UPP1                       | Uridine phosphorylase 1                                    | Q16831 | UPP1     | chr7:48088628   | Wald ratio                | 1  | 0.115  | 0.053 | 2.906E-02 | 0.649 | cis | SARS-CoV-2 infection |
| 2828_82   | HAI-1                      | Kunitz-type protease inhibitor 1                           | O43278 | SPINT1   | chr15:40844018  | Inverse variance weighted | 2  | -0.052 | 0.024 | 2.912E-02 | 0.649 | cis | SARS-CoV-2 infection |
| 3593_72   | Caspase-3                  | Caspase-3                                                  | P42574 | CASP3    | chr4:184650062  | Wald ratio                | 1  | 0.089  | 0.041 | 2.953E-02 | 0.650 | cis | SARS-CoV-2 infection |
| 7769_29   | 3BP2                       | SH3 domain-binding protein 2                               | P78314 | SH3BP2   | chr4:2793071    | Inverse variance weighted | 3  | 0.064  | 0.029 | 3.012E-02 | 0.654 | cis | SARS-CoV-2 infection |
| 12558_3   | UBS3B                      | Ubiquitin-associated and SH3 domain-containing protein B   | Q8TF42 | UBASH3B  | chr11:122655722 | Inverse variance weighted | 2  | -0.097 | 0.046 | 3.259E-02 | 0.696 | cis | SARS-CoV-2 infection |
| 9962_1    | MUCDL                      | Cadherin-related family member 5                           | Q9HB88 | CDHR5    | chr11:626078    | Wald ratio                | 1  | -0.184 | 0.086 | 3.286E-02 | 0.696 | cis | SARS-CoV-2 infection |
| 19207_119 | ADK                        | Adenosine kinase                                           | P55263 | ADK      | chr10:74151202  | Wald ratio                | 1  | 0.131  | 0.062 | 3.348E-02 | 0.697 | cis | SARS-CoV-2 infection |
| 9478_69   | KPRA                       | Phosphoribosyl pyrophosphate synthase-associated protein 1 | Q14558 | PRPSA1   | chr17:76384521  | Wald ratio                | 1  | -0.135 | 0.064 | 3.385E-02 | 0.697 | cis | SARS-CoV-2 infection |
| 9715_15   | IGSF3                      | Immunoglobulin superfamily member 3                        | O75054 | IGSF3    | chr1:116667755  | Inverse variance weighted | 3  | 0.090  | 0.043 | 3.419E-02 | 0.697 | cis | SARS-CoV-2 infection |
| 5636_10   | MFAP4                      | Microfibril-associated glycoprotein 4                      | P55083 | MFAP4    | chr17:19387190  | Inverse variance weighted | 2  | 0.053  | 0.025 | 3.575E-02 | 0.714 | cis | SARS-CoV-2 infection |
| 5457_5    | COLEC12                    | Collectin-12                                               | Q5KU26 | COLEC12  | chr18:500722    | Inverse variance weighted | 3  | 0.070  | 0.034 | 3.665E-02 | 0.714 | cis | SARS-CoV-2 infection |
| 16818_200 | CDCP1                      | CUB domain-containing protein 1                            | Q9HSV8 | CDCP1    | chr3:45146422   | Inverse variance weighted | 3  | -0.054 | 0.026 | 3.680E-02 | 0.714 | cis | SARS-CoV-2 infection |
| 6904_14   | LRR72                      | Leucine-rich repeat transmembrane neuronal protein 2       | O43300 | LRR72    | chr5:138875368  | Wald ratio                | 1  | 0.122  | 0.059 | 3.704E-02 | 0.714 | cis | SARS-CoV-2 infection |
| 4294_16   | Sphingosine kinase 1       | Sphingosine kinase 1                                       | Q9NYA1 | SPHK1    | chr17:76376584  | Inverse variance weighted | 2  | -0.097 | 0.047 | 3.715E-02 | 0.714 | cis | SARS-CoV-2 infection |
| 13381_49  | B4GT1                      | Beta-1,4-galactosyltransferase 1                           | P15291 | B4GALT1  | chr9:33167356   | Inverse variance weighted | 2  | -0.051 | 0.025 | 4.024E-02 | 0.736 | cis | SARS-CoV-2 infection |
| 16918_198 | TLR3                       | Toll-like receptor 3                                       | O15455 | TLR3     | chr4:186068911  | Inverse variance weighted | 8  | 0.023  | 0.011 | 4.033E-02 | 0.736 | cis | SARS-CoV-2 infection |
| 11211_7   | TBCE                       | Tubulin-specific chaperone E                               | Q15813 | TBCE     | chr1:235367360  | Inverse variance weighted | 2  | -0.085 | 0.041 | 4.065E-02 | 0.736 | cis | SARS-CoV-2 infection |
| 15324_58  | Ferritin light chain       | Ferritin light chain                                       | P02792 | FTL      | chr19:48965309  | Wald ratio                | 1  | -0.207 | 0.101 | 4.082E-02 | 0.736 | cis | SARS-CoV-2 infection |
| 2985_35   | Gro-a                      | Growth-regulated alpha protein                             | P09341 | CXCL1    | chr4:73869393   | Inverse variance weighted | 8  | 0.030  | 0.015 | 4.140E-02 | 0.736 | cis | SARS-CoV-2 infection |
| 5202_4    | PPID                       | Peptidyl-prolyl cis-trans isomerase D                      | Q08752 | PPID     | chr1:158723396  | Inverse variance weighted | 2  | -0.038 | 0.019 | 4.185E-02 | 0.736 | cis | SARS-CoV-2 infection |
| 5491_12   | Testican-2                 | Testican-2                                                 | Q92563 | SPOCK2   | chr10:72089032  | Wald ratio                | 1  | -0.050 | 0.025 | 4.218E-02 | 0.736 | cis | SARS-CoV-2 infection |
| 16302_11  | SPLC2                      | BPI fold-containing family A member 2                      | Q96DR5 | BPIFA2   | chr20:33161768  | Wald ratio                | 1  | -0.149 | 0.073 | 4.240E-02 | 0.736 | cis | SARS-CoV-2 infection |
| 2644_11   | PKC-A                      | Protein kinase C alpha type                                | P12752 | PRKCA    | chr17:66302613  | Wald ratio                | 1  | -0.237 | 0.117 | 4.243E-02 | 0.736 | cis | SARS-CoV-2 infection |
| 13388_57  | NEC1                       | Neuroendocrine convertase 1                                | P29120 | PCSK1    | chr5:96434143   | Inverse variance weighted | 7  | -0.025 | 0.012 | 4.268E-02 | 0.736 | cis | SARS-CoV-2 infection |
| 15316_262 | TXN4B                      | Thioredoxin-like protein 4B                                | Q9NX01 | TXNL4B   | chr16:72094431  | Wald ratio                | 1  | 0.109  | 0.054 | 4.407E-02 | 0.738 | cis | SARS-CoV-2 infection |
| 3003_29   | Nkp30                      | Natural cytotoxicity triggering receptor 3                 | O14931 | NCR3     | chr6:31593006   | Wald ratio                | 1  | 0.134  | 0.067 | 4.420E-02 | 0.738 | cis | SARS-CoV-2 infection |
| 13671_40  | Elastase                   | Neutrophil elastase                                        | P08246 | ELANE    | chr19:851014    | Inverse variance weighted | 5  | 0.049  | 0.024 | 4.432E-02 | 0.738 | cis | SARS-CoV-2 infection |
| 7198_197  | FA20B                      | Glycosaminoglycan xylosylkinase                            | O75063 | FAM20B   | chr1:179025804  | Inverse variance weighted | 2  | -0.095 | 0.047 | 4.481E-02 | 0.738 | cis | SARS-CoV-2 infection |
| 17514_48  | RAB21                      | Ras-related protein Rab-21                                 | Q9UL25 | RAB21    | chr12:71754863  | Wald ratio                | 1  | -0.126 | 0.063 | 4.549E-02 | 0.738 | cis | SARS-CoV-2 infection |
| 4546_27   | EMR2                       | Adhesion G protein-coupled receptor E2                     | Q9UHX3 | ADGRE2   | chr19:14778560  | Inverse variance weighted | 5  | 0.027  | 0.013 | 4.574E-02 | 0.738 | cis | SARS-CoV-2 infection |
| 11356_19  | DGCR14                     | Protein DGCR14                                             | Q96DF8 | ESS2     | chr22:19144684  | Wald ratio                | 1  | -0.089 | 0.045 | 4.590E-02 | 0.738 | cis | SARS-CoV-2 infection |
| 2844_53   | sTie-1                     | Tyrosine-protein kinase receptor Tie-1, soluble            | P35590 | TIE1     | chr1:43300982   | Inverse variance weighted | 4  | 0.041  | 0.021 | 4.735E-02 | 0.754 | cis | SARS-CoV-2 infection |
| 15515_2   | SAA                        | Serum amyloid A-1 protein                                  | P0D1I8 | SAAL     | chr11:18266260  | Inverse variance weighted | 4  | 0.079  | 0.040 | 4.897E-02 | 0.767 | cis | SARS-CoV-2 infection |
| 18188_12  | GATM                       | Glycine amidinotransferase, mitochondrial                  | P50440 | GATM     | chr15:45402327  | Wald ratio                | 1  | -0.056 | 0.028 | 4.905E-02 | 0.767 | cis | SARS-CoV-2 infection |
| 6629_3    | HBD-1                      | Beta-defensin 1                                            | P60022 | DEFB1    | chr8:6877936    | Inverse variance weighted | 5  | -0.025 | 0.013 | 5.075E-02 | 0.776 | cis | SARS-CoV-2 infection |
| 12376_85  | p19-INK4d                  | Cyclin-dependent kinase 4 inhibitor D                      | P55273 | CDKN2D   | chr19:10569059  | Wald ratio                | 1  | -0.212 | 0.108 | 5.096E-02 | 0.776 | cis | SARS-CoV-2 infection |
| 15641_20  | TEFF1                      | Tomoregulin-1                                              | Q8IYR6 | TMEFF1   | chr9:100473149  | Wald ratio                | 1  | -0.168 | 0.087 | 5.157E-02 | 0.776 | cis | SARS-CoV-2 infection |
| 6414_8    | OAF                        | Out at first protein homolog                               | Q86UD1 | OAF      | chr11:120211032 | Inverse variance weighted | 5  | -0.019 | 0.010 | 5.226E-02 | 0.776 | cis | SARS-CoV-2 infection |
| 3890_8    | LDH-H 1                    | L-lactate dehydrogenase B chain                            | P07195 | LDHB     | chr12:21757857  | Wald ratio                | 1  | 0.226  | 0.117 | 5.295E-02 | 0.776 | cis | SARS-CoV-2 infection |
| 19267_14  | GLO2                       | Hydroxyacylglutathione hydrolase, mitochondrial            | Q16775 | HAGH     | chr16:1827157   | Wald ratio                | 1  | 0.064  | 0.033 | 5.313E-02 | 0.776 | cis | SARS-CoV-2 infection |
| 2418_55   | Apo E                      | Apolipoprotein E                                           | P02649 | APOE     | chr19:44905791  | Inverse variance weighted | 4  | 0.060  | 0.031 | 5.351E-02 | 0.776 | cis | SARS-CoV-2 infection |
| 2849_49   | AIF1                       | Allograft inflammatory factor 1                            | P55008 | AIF1     | chr6:31615217   | Inverse variance weighted | 2  | 0.148  | 0.077 | 5.407E-02 | 0.776 | cis | SARS-CoV-2 infection |
| 5740_17   | ROBO1                      | Roundabout homolog 1                                       | Q9Y6N7 | ROBO1    | chr3:79767998   | Inverse variance weighted | 3  | 0.070  | 0.036 | 5.433E-02 | 0.776 | cis | SARS-CoV-2 infection |
| 8969_49   | CD14                       | Monocyte differentiation antigen CD14                      | P08571 | CD14     | chr5:140633700  | Wald ratio                | 1  | -0.240 | 0.125 | 5.475E-02 | 0.776 | cis | SARS-CoV-2 infection |
| 10754_113 | Prokineticin-2             | Prokineticin-2                                             | Q9HC23 | PROK2    | chr3:71785206   | Inverse variance weighted | 6  | -0.021 | 0.011 | 5.501E-02 | 0.776 | cis | SARS-CoV-2 infection |
| 15386_7   | FABPA                      | Fatty acid-binding protein, adipocyte                      | P15090 | FABPA    | chr8:81483236   | Wald ratio                | 1  | -0.117 | 0.061 | 5.585E-02 | 0.776 | cis | SARS-CoV-2 infection |
| 17726_3   | SAR1A                      | GTP-binding protein SAR1A                                  | Q9NR31 | SAR1A    | chr10:70170523  | Inverse variance weighted | 2  | 0.099  | 0.052 | 5.647E-02 | 0.776 | cis | SARS-CoV-2 infection |
| 18295_102 | GRHPR                      | Glyoxylate reductase/hydroxypyruvate reductase             | Q9UBQ7 | GRHPR    | chr9:37422666   | Inverse variance weighted | 3  | -0.033 | 0.017 | 5.713E-02 | 0.776 | cis | SARS-CoV-2 infection |
| 4464_10   | Sialoadhesin               | Sialoadhesin                                               | Q9B222 | SIGLEC1  | chr20:3712600   | Wald ratio                | 1  | 0.198  | 0.104 | 5.738E-02 | 0.776 | cis | SARS-CoV-2 infection |
| 3280_49   | Aggrecan                   | Aggrecan core protein                                      | P16112 | ACAN     | chr15:88803436  | Inverse variance weighted | 2  | 0.069  | 0.037 | 5.789E-02 | 0.776 | cis | SARS-CoV-2 infection |
| 9201_13   | Transgelin-2               | Transgelin-2                                               | P37802 | TAGLN2   | chr1:159925507  | Wald ratio                | 1  | -0.194 | 0.103 | 5.866E-02 | 0.776 | cis | SARS-CoV-2 infection |
| 2750_3    | Apo A-I                    | Apolipoprotein A-I                                         | P02647 | APOA1    | chr11:116837622 | Inverse variance weighted | 3  | -0.042 | 0.022 | 5.867E-02 | 0.776 | cis | SARS-CoV-2 infection |
| 6965_19   | CNTP2                      | Contactin-associated protein-like 2                        | Q9UHC6 | CNTNAP2  | chr7:146116002  | Inverse variance weighted | 5  | 0.023  | 0.012 | 5.881E-02 | 0.776 | cis | SARS-CoV-2 infection |
| 6955_68   | SNX1                       | Sorting nexin-1                                            | Q13596 | SNX1     | chr15:64094123  | Wald ratio                | 1  | -0.072 | 0.038 | 5.890E-02 | 0.776 | cis | SARS-CoV-2 infection |
| 8397_147  | QSOX2                      | Sulphydryl oxidase 2                                       | Q6ZRP7 | QSOX2    | chr9:136245812  | Inverse variance weighted | 7  | 0.022  | 0.012 | 6.016E-02 | 0.783 | cis | SARS-CoV-2 infection |
| 6462_12   | TIMP-4                     | Metalloproteinase inhibitor 4                              | Q99727 | TIMP4    | chr3:12158912   | Inverse variance weighted | 8  | -0.032 | 0.017 | 6.046E-02 | 0.783 | cis | SARS-CoV-2 infection |
| 15453_3   | a1-Microglobulin           | Alpha-1-microglobulin                                      | P02760 | AMB      | chr9:114078328  | Inverse variance weighted | 2  | -0.079 | 0.042 | 6.084E-02 | 0.783 | cis | SARS-CoV-2 infection |
| 11142_11  | ANG11.C-term               | Angiotensin-related protein 11.C-Term, Fibrinogen domain   | O95841 | ANGPTL1  | chr1:178871077  | Inverse variance weighted | 4  | 0.029  | 0.016 | 6.139E-02 | 0.784 | cis | SARS-CoV-2 infection |
| 12637_7   | CACP                       | Carnitine O-acetyltransferase                              | P43155 | CRAT     | chr9:129111189  | Wald ratio                | 1  | 0.103  | 0.055 | 6.207E-02 | 0.787 | cis | SARS-CoV-2 infection |
| 9876_20   | aldolase C                 | Fructose-bisphosphate aldolase C                           | P09972 | ALDOC    | chr17:28576948  | Inverse variance weighted | 2  | -0.132 | 0.071 | 6.343E-02 | 0.795 | cis | SARS-CoV-2 infection |
| 19556_12  | Complement receptor type 1 | Complement receptor type 1                                 | P17927 | CR1      | chr1:207496147  | Inverse variance weighted | 10 | -0.034 | 0.018 | 6.366E-02 | 0.795 | cis | SARS-CoV-2 infection |
| 8759_29   | a1,4-Galactosyltransferase | Lactosylceramide 4-alpha-galactosyltransferase             | Q9NPC4 | A4GALT   | chr22:42712298  | Inverse variance weighted | 4  | 0.026  | 0.014 | 6.487E-02 | 0.800 | cis | SARS-CoV-2 infection |
| 4276_10   | prostatic binding protein  | Phosphatidylethanolamine-binding protein 1                 | P30086 | PEBP1    | chr12:118136124 | Inverse variance weighted | 7  | -0.029 | 0.016 | 6.527E-02 | 0.800 | cis | SARS-CoV-2 infection |

|           |                             |                                                                     |        |         |                 |                           |    |        |       |           |       |     |                      |
|-----------|-----------------------------|---------------------------------------------------------------------|--------|---------|-----------------|---------------------------|----|--------|-------|-----------|-------|-----|----------------------|
| 16606_85  | Aldose reductase            | Aldose reductase                                                    | P15121 | AKR1B1  | chr7:134459284  | Inverse variance weighted | 2  | 0.080  | 0.044 | 6.568E-02 | 0.800 | cis | SARS-CoV-2 infection |
| 14205_6   | HEX12                       | Protein HEXIM2                                                      | Q96MH2 | HEXIM2  | chr17:45160700  | Wald ratio                | 1  | 0.203  | 0.111 | 6.643E-02 | 0.800 | cis | SARS-CoV-2 infection |
| 15487_164 | carboxylesterase, liver     | Liver carboxylesterase 1                                            | P23141 | CES1    | chr16:55833337  | Wald ratio                | 1  | -0.198 | 0.108 | 6.645E-02 | 0.800 | cis | SARS-CoV-2 infection |
| 3484_60   | Angiotensinogen             | Angiotensinogen                                                     | P01019 | AGT     | chr12:230745576 | Inverse variance weighted | 2  | -0.046 | 0.025 | 6.762E-02 | 0.802 | cis | SARS-CoV-2 infection |
| 3323_37   | LRP8                        | Low-density lipoprotein receptor-related protein 8                  | Q14114 | LRP8    | chr1:53328469   | Inverse variance weighted | 2  | -0.045 | 0.025 | 6.764E-02 | 0.802 | cis | SARS-CoV-2 infection |
| 13463_1   | PXDN                        | Peroxidasin homolog                                                 | Q92626 | PXDN    | chr2:1744852    | Inverse variance weighted | 4  | 0.070  | 0.039 | 6.962E-02 | 0.809 | cis | SARS-CoV-2 infection |
| 14131_37  | EFNB2:ECD                   | Ephrin-B2:Extracellular domain                                      | P52799 | EFNB2   | chr13:106535662 | Inverse variance weighted | 2  | 0.116  | 0.064 | 6.976E-02 | 0.809 | cis | SARS-CoV-2 infection |
| 12432_23  | CYBP                        | Calcyclin-binding protein                                           | Q9H871 | CACYBP  | chr1:174999163  | Wald ratio                | 1  | -0.064 | 0.035 | 7.004E-02 | 0.809 | cis | SARS-CoV-2 infection |
| 8464_31   | RSP04                       | R-spondin-4                                                         | Q210M5 | RSP04   | chr20:1002311   | Inverse variance weighted | 2  | 0.089  | 0.049 | 7.013E-02 | 0.809 | cis | SARS-CoV-2 infection |
| 15388_24  | FcR1IIa                     | Low affinity immunoglobulin gamma Fc region receptor III-A          | P08637 | FCGR3A  | chr1:161550968  | Inverse variance weighted | 6  | -0.030 | 0.016 | 7.146E-02 | 0.813 | cis | SARS-CoV-2 infection |
| 16856_79  | MARE2                       | Microtubule-associated protein RP/EB family member 2                | Q15555 | MAPRE2  | chr18:34976928  | Wald ratio                | 1  | -0.057 | 0.031 | 7.176E-02 | 0.813 | cis | SARS-CoV-2 infection |
| 13748_4   | MCP-2                       | C.C motif chemokine 8                                               | P80075 | CCL8    | chr17:34319435  | Inverse variance weighted | 7  | 0.027  | 0.015 | 7.198E-02 | 0.813 | cis | SARS-CoV-2 infection |
| 4996_66   | HRG                         | Histidine-rich glycoprotein                                         | P04196 | HRG     | chr3:186660216  | Inverse variance weighted | 5  | 0.024  | 0.013 | 7.270E-02 | 0.814 | cis | SARS-CoV-2 infection |
| 12395_86  | SYDM                        | Aspartate-tRNA ligase, mitochondrial                                | Q6PI48 | DARS2   | chr1:173824653  | Wald ratio                | 1  | -0.096 | 0.054 | 7.297E-02 | 0.814 | cis | SARS-CoV-2 infection |
| 11104_13  | YKL-40                      | Chitinase-3-like protein 1                                          | P36222 | CHI3L1  | chr1:203186704  | Inverse variance weighted | 7  | -0.015 | 0.008 | 7.443E-02 | 0.824 | cis | SARS-CoV-2 infection |
| 2966_65   | SCGF-beta                   | Stem cell growth factor-beta                                        | Q9Y240 | CLEC11A | chr19:50723364  | Wald ratio                | 1  | 0.249  | 0.140 | 7.492E-02 | 0.824 | cis | SARS-CoV-2 infection |
| 18917_53  | Pancreatic alpha-amylase    | Pancreatic alpha-amylase                                            | P04746 | AMY2A   | chr1:103617427  | Inverse variance weighted | 4  | -0.053 | 0.030 | 7.647E-02 | 0.834 | cis | SARS-CoV-2 infection |
| 19372_7   | MDGA2                       | MAM domain-containing glycosylphosphatidylinositol anchor protein 2 | Q7Z553 | MDGA2   | chr14:47675605  | Inverse variance weighted | 11 | -0.014 | 0.008 | 7.680E-02 | 0.834 | cis | SARS-CoV-2 infection |
| 2617_56   | ERBB3                       | Receptor tyrosine-protein kinase erbB-3                             | P21860 | ERBB3   | chr12:56076799  | Wald ratio                | 1  | 0.077  | 0.044 | 7.765E-02 | 0.838 | cis | SARS-CoV-2 infection |
| 10605_22  | APMAP                       | Adipocyte plasma membrane-associated protein                        | Q9HDC9 | APMAP   | chr20:24992751  | Wald ratio                | 1  | 0.147  | 0.084 | 7.838E-02 | 0.840 | cis | SARS-CoV-2 infection |
| 17856_23  | NT5M                        | 5'(3')-deoxyribonucleotidase, mitochondrial                         | Q9NPB1 | NT5M    | chr17:17303335  | Wald ratio                | 1  | -0.081 | 0.046 | 7.895E-02 | 0.841 | cis | SARS-CoV-2 infection |
| 6947_4    | SIA10                       | Type 2 lactosamine alpha-2,3-sialyltransferase                      | Q9Y274 | ST3GAL6 | chr3:98732236   | Inverse variance weighted | 9  | -0.013 | 0.007 | 8.012E-02 | 0.848 | cis | SARS-CoV-2 infection |
| 2743_5    | Sonic Hedgehog              | Sonic hedgehog protein                                              | Q15465 | SHH     | chr7:155812463  | Inverse variance weighted | 2  | -0.073 | 0.042 | 8.112E-02 | 0.852 | cis | SARS-CoV-2 infection |
| 13107_9   | LYPD3                       | Ly6/PLAUR domain-containing protein 3                               | O95274 | LYPD3   | chr19:43465608  | Wald ratio                | 1  | 0.093  | 0.053 | 8.150E-02 | 0.852 | cis | SARS-CoV-2 infection |
| 6574_11   | FAIM3                       | Fas apoptotic inhibitory molecule 3                                 | O60667 | FCMR    | chr1:206923247  | Inverse variance weighted | 2  | -0.122 | 0.070 | 8.284E-02 | 0.852 | cis | SARS-CoV-2 infection |
| 8894_80   | hnRNP A/B                   | Heterogeneous nuclear ribonucleoprotein A/B                         | Q99729 | HNRNPAB | chr5:178204533  | Wald ratio                | 1  | 0.118  | 0.068 | 8.321E-02 | 0.852 | cis | SARS-CoV-2 infection |
| 6408_2    | INHBC                       | Inhibin beta C chain                                                | P55103 | INHBC   | chr12:57434784  | Inverse variance weighted | 2  | 0.090  | 0.052 | 8.326E-02 | 0.852 | cis | SARS-CoV-2 infection |
| 7950_142  | BTNL9                       | Butyrophilin-like protein 9                                         | Q6UXG8 | BTNL9   | chr5:181040225  | Wald ratio                | 1  | -0.130 | 0.075 | 8.452E-02 | 0.852 | cis | SARS-CoV-2 infection |
| 3212_30   | ASAH2                       | Neutral ceramidase                                                  | Q9NR71 | ASAH2   | chr10:50279720  | Inverse variance weighted | 6  | -0.016 | 0.009 | 8.513E-02 | 0.852 | cis | SARS-CoV-2 infection |
| 14112_40  | REL1                        | Tumor necrosis factor receptor superfamily member 19L               | Q96924 | REL1    | chr11:73376399  | Wald ratio                | 1  | -0.166 | 0.097 | 8.559E-02 | 0.852 | cis | SARS-CoV-2 infection |
| 19347_37  | Carbonic Anhydrase XII      | Carbonic anhydrase 12                                               | O43570 | CA12    | chr15:63381846  | Wald ratio                | 1  | 0.176  | 0.102 | 8.573E-02 | 0.852 | cis | SARS-CoV-2 infection |
| 11441_11  | PYGL                        | Glycogen phosphorylase, liver form                                  | P06737 | PYGL    | chr14:50944483  | Inverse variance weighted | 2  | -0.067 | 0.039 | 8.744E-02 | 0.852 | cis | SARS-CoV-2 infection |
| 11369_23  | ADHX                        | Alcohol dehydrogenase class-3                                       | P11766 | ADH5    | chr4:99088801   | Inverse variance weighted | 3  | -0.109 | 0.064 | 8.808E-02 | 0.852 | cis | SARS-CoV-2 infection |
| 10521_10  | MXRA8:ECD                   | Matrix-remodeling-associated protein 8:Extracellular domain         | Q9BRK3 | MXRA8   | chr1:1361777    | Wald ratio                | 1  | -0.089 | 0.052 | 8.908E-02 | 0.852 | cis | SARS-CoV-2 infection |
| 3858_5    | PPAC                        | Low molecular weight phosphotyrosine protein phosphatase            | P24666 | ACP1    | chr2:264140     | Inverse variance weighted | 7  | -0.016 | 0.009 | 8.993E-02 | 0.852 | cis | SARS-CoV-2 infection |
| 7948_129  | GLT2D                       | Glycolipid transfer protein domain-containing protein 2             | AGNH11 | GLTPD2  | chr17:4788964   | Inverse variance weighted | 3  | 0.035  | 0.021 | 9.114E-02 | 0.852 | cis | SARS-CoV-2 infection |
| 2201_17   | Endostatin                  | Endostatin                                                          | P39065 | COL18A1 | chr21:45405165  | Inverse variance weighted | 4  | -0.045 | 0.027 | 9.151E-02 | 0.852 | cis | SARS-CoV-2 infection |
| 17156_72  | DCAK1                       | Serine/threonine-protein kinase DCLK1                               | O15075 | DCLK1   | chr13:36131382  | Inverse variance weighted | 3  | 0.040  | 0.023 | 9.161E-02 | 0.852 | cis | SARS-CoV-2 infection |
| 17408_2   | PMM1                        | Phosphomannomutase 1                                                | Q92871 | PMM1    | chr22:41589871  | Wald ratio                | 1  | 0.159  | 0.095 | 9.193E-02 | 0.852 | cis | SARS-CoV-2 infection |
| 16035_8   | VEGF sR3                    | Vascular endothelial growth factor receptor 3                       | P35916 | FLT4    | chr5:180649624  | Inverse variance weighted | 3  | -0.062 | 0.037 | 9.196E-02 | 0.852 | cis | SARS-CoV-2 infection |
| 13473_55  | IP3KA                       | Inositol-trisphosphate 3-kinase A                                   | P23677 | ITPKA   | chr15:41493393  | Wald ratio                | 1  | 0.114  | 0.068 | 9.277E-02 | 0.852 | cis | SARS-CoV-2 infection |
| 13692_154 | WISP-1                      | WNT1-inducible-signaling pathway protein 1                          | O95388 | CNCA    | chr8:133191039  | Inverse variance weighted | 8  | -0.016 | 0.010 | 9.287E-02 | 0.852 | cis | SARS-CoV-2 infection |
| 14208_3   | RET7                        | Retinoid-binding protein 7                                          | Q96R05 | RBP7    | chr1:9997206    | Inverse variance weighted | 2  | 0.066  | 0.039 | 9.348E-02 | 0.852 | cis | SARS-CoV-2 infection |
| 6342_10   | Nephronectin                | Nephronectin                                                        | Q6UX19 | NPNT    | chr4:105894775  | Inverse variance weighted | 3  | 0.042  | 0.025 | 9.353E-02 | 0.852 | cis | SARS-CoV-2 infection |
| 19504_22  | KTHY                        | Thymidylate kinase                                                  | P23919 | TYTMMK  | chr2:241686944  | Inverse variance weighted | 3  | 0.102  | 0.061 | 9.356E-02 | 0.852 | cis | SARS-CoV-2 infection |
| 13130_150 | HKX2                        | Hexokinase-2                                                        | P52789 | HK2     | chr2:74834127   | Inverse variance weighted | 2  | -0.101 | 0.060 | 9.392E-02 | 0.852 | cis | SARS-CoV-2 infection |
| 17694_32  | PSME2                       | Proteasome activator complex subunit 2                              | Q9UI46 | PSME2   | chr14:24147570  | Inverse variance weighted | 3  | -0.041 | 0.024 | 9.413E-02 | 0.852 | cis | SARS-CoV-2 infection |
| 15486_126 | ABP1                        | Amloride-sensitive amine oxidase [copper-containing]                | P19801 | AOC1    | chr17:150824627 | Inverse variance weighted | 10 | -0.014 | 0.008 | 9.560E-02 | 0.852 | cis | SARS-CoV-2 infection |
| 4342_10   | sICAM-1                     | Intercellular adhesion molecule 1                                   | P05362 | ICAM1   | chr19:10271093  | Inverse variance weighted | 9  | 0.015  | 0.009 | 9.578E-02 | 0.852 | cis | SARS-CoV-2 infection |
| 17682_1   | CD46                        | Membrane cofactor protein                                           | P15529 | CD46    | chr1:207752037  | Inverse variance weighted | 2  | 0.044  | 0.027 | 9.605E-02 | 0.852 | cis | SARS-CoV-2 infection |
| 7244_16   | TM149                       | IGF-like family receptor 1                                          | Q9H665 | IGFLR1  | chr19:35742453  | Inverse variance weighted | 4  | 0.017  | 0.010 | 9.615E-02 | 0.852 | cis | SARS-CoV-2 infection |
| 13733_5   | IL-12 p40                   | Interleukin-12 subunit beta                                         | P29460 | IL12B   | chr5:159330863  | Inverse variance weighted | 7  | 0.020  | 0.012 | 9.642E-02 | 0.852 | cis | SARS-CoV-2 infection |
| 13590_1   | ORN                         | Oligoribonuclease, mitochondrial                                    | Q9Y388 | REXO2   | chr11:114439435 | Wald ratio                | 1  | -0.069 | 0.041 | 9.688E-02 | 0.852 | cis | SARS-CoV-2 infection |
| 2991_9    | IL-1 sRI                    | Interleukin-1 receptor type 1                                       | P14778 | IL1R1   | chr2:102064544  | Inverse variance weighted | 2  | -0.069 | 0.042 | 9.719E-02 | 0.852 | cis | SARS-CoV-2 infection |
| 10603_1   | HIS3                        | Histatin-3                                                          | P15516 | HTN3    | chr4:70028455   | Inverse variance weighted | 3  | -0.060 | 0.036 | 9.802E-02 | 0.852 | cis | SARS-CoV-2 infection |
| 7059_14   | LIRA6                       | Leukocyte immunoglobulin-like receptor subfamily A member 6         | Q6PI73 | LIRA6   | chr19:54242791  | Inverse variance weighted | 7  | 0.030  | 0.018 | 9.849E-02 | 0.852 | cis | SARS-CoV-2 infection |
| 5350_14   | GPC6                        | Glypican-6                                                          | Q9Y625 | GPC6    | chr13:93226807  | Wald ratio                | 1  | 0.166  | 0.101 | 9.918E-02 | 0.852 | cis | SARS-CoV-2 infection |
| 3325_2    | MATN2                       | Matrin-2                                                            | O00339 | MATN2   | chr8:97868840   | Inverse variance weighted | 4  | 0.050  | 0.030 | 9.938E-02 | 0.852 | cis | SARS-CoV-2 infection |
| 10977_55  | UCMA                        | Unique cartilage matrix-associated protein                          | Q8WVF2 | UCMA    | chr10:13234374  | Inverse variance weighted | 6  | 0.025  | 0.015 | 9.946E-02 | 0.852 | cis | SARS-CoV-2 infection |
| 19279_42  | CRBP                        | Retinol-binding protein 1                                           | P09455 | RBP1    | chr3:139539829  | Wald ratio                | 1  | 0.118  | 0.072 | 9.982E-02 | 0.852 | cis | SARS-CoV-2 infection |
| 12387_7   | PDLI4                       | PDZ and LIM domain protein 4                                        | P50479 | PDILM4  | chr5:132257696  | Wald ratio                | 1  | -0.049 | 0.030 | 1.003E-01 | 0.852 | cis | SARS-CoV-2 infection |
| 4278_14   | Protein disulfide-isomerase | Protein disulfide-isomerase                                         | P07237 | PAH8    | chr17:81860856  | Wald ratio                | 1  | -0.067 | 0.041 | 1.015E-01 | 0.858 | cis | SARS-CoV-2 infection |
| 5605_77   | MFNG                        | Beta-1,3-N-acetylglucosaminyltransferase manic fringe               | O00587 | MFNG    | chr22:37486393  | Wald ratio                | 1  | 0.073  | 0.045 | 1.041E-01 | 0.874 | cis | SARS-CoV-2 infection |
| 7551_33   | LRC32                       | Leucine-rich repeat-containing protein 32                           | Q14392 | LRC32   | chr11:76670747  | Wald ratio                | 1  | -0.127 | 0.078 | 1.045E-01 | 0.874 | cis | SARS-CoV-2 infection |
| 6984_6    | IGSF8                       | Immunoglobulin superfamily member 8                                 | Q96990 | IGSF8   | chr1:160098943  | Inverse variance weighted | 2  | 0.051  | 0.032 | 1.079E-01 | 0.879 | cis | SARS-CoV-2 infection |
| 5900_11   | HINT1                       | Histidine triad nucleotide-binding protein 1                        | P49773 | HINT1   | chr5:131224468  | Wald ratio                | 1  | 0.103  | 0.064 | 1.080E-01 | 0.879 | cis | SARS-CoV-2 infection |
| 4254_6    | NUDC3                       | NudC domain-containing protein 3                                    | Q8IVD9 | NUDCD3  | chr7:44490658   | Wald ratio                | 1  | 0.116  | 0.072 | 1.080E-01 | 0.879 | cis | SARS-CoV-2 infection |
| 9312_8    | AZGP1                       | Zinc-alpha-2-glycoprotein                                           | P25311 | AZGP1   | chr7:99976042   | Inverse variance weighted | 3  | -0.111 | 0.069 | 1.086E-01 | 0.879 | cis | SARS-CoV-2 infection |
| 2837_3    | Met                         | Hepatocyte growth factor receptor                                   | P08581 | MET     | chr7:116672196  | Inverse variance weighted | 4  | 0.049  | 0.031 | 1.094E-01 | 0.879 | cis | SARS-CoV-2 infection |
| 17331_138 | KREM1                       | Kremen protein 1                                                    | Q96MU8 | KREMEN1 | chr22:29073035  | Inverse variance weighted | 3  | -0.038 | 0.024 | 1.096E-01 | 0.879 | cis | SARS-CoV-2 infection |
| 17748_21  | QORX                        | Quinone oxidoreductase PIG3                                         | Q53FA7 | TP53A7  | chr2:24085861   | Inverse variance weighted | 5  | -0.031 | 0.019 | 1.106E-01 | 0.879 | cis | SARS-CoV-2 infection |
| 15582_25  | FCN1                        | Ficolin-1                                                           | O00602 | FCN1    | chr9:134917912  | Inverse variance weighted | 5  | 0.027  | 0.017 | 1.116E-01 | 0.879 | cis | SARS-CoV-2 infection |
| 12366_16  | CRGD                        | Gamma-crystallin D                                                  | P07320 | CRYGD   | chr2:208124524  | Wald ratio                | 1  | 0.069  | 0.043 | 1.117E-01 | 0.879 | cis | SARS-CoV-2 infection |
| 5451_1    | ALCAM                       | CD166 antigen                                                       | Q13740 | ALCAM   | chr3:105366909  | Inverse variance weighted | 4  | 0.059  | 0.037 | 1.120E-01 | 0.879 | cis | SARS-CoV-2 infection |
| 5459_33   | CYTN                        | Cystatin-SN                                                         | P01037 | CS1     | chr20:23751268  | Inverse variance weighted | 5  | 0.058  | 0.036 | 1.120E-01 | 0.879 | cis | SARS-CoV-2 infection |
| 6364_7    | TPSNR                       | Tapasin-related protein                                             | Q9BX59 | TAPBPL  | chr12:6451690   | Inverse variance weighted | 7  | -0.015 | 0.009 | 1.123E-01 | 0.879 | cis | SARS-CoV-2 infection |
| 5109_24   | Nr-CAM                      | Neuronal cell adhesion molecule                                     | Q92823 | NRCAM   | chr7:108456717  | Wald ratio                | 1  | 0.126  | 0.079 | 1.127E-01 | 0.879 | cis | SARS-CoV-2 infection |
| 17419_17  | TES                         | Testin                                                              | Q9UGI8 | TES     | chr7:116210506  | Wald ratio                | 1  | -0.105 | 0.066 | 1.127E-01 | 0.879 | cis | SARS-CoV-2 infection |

|           |                            |                                                                            |        |            |                 |                           |    |        |       |           |       |     |                      |
|-----------|----------------------------|----------------------------------------------------------------------------|--------|------------|-----------------|---------------------------|----|--------|-------|-----------|-------|-----|----------------------|
| 8841_65   | CILP2                      | Cartilage intermediate layer protein 2                                     | Q8IUJ8 | CILP2      | chr19:19538248  | Wald ratio                | 1  | 0.109  | 0.068 | 1.130E-01 | 0.879 | cis | SARS-CoV-2 infection |
| 8768_4    | Bcl-10                     | B-cell lymphoma/leukemia 10                                                | O95999 | BCLL10     | chr1:85276632   | Wald ratio                | 1  | -0.143 | 0.091 | 1.154E-01 | 0.888 | cis | SARS-CoV-2 infection |
| 5691_2    | CRLD2                      | Cysteine-rich secretory protein LCCL domain-containing 2                   | Q9H088 | CRISPLD2   | chr16:84819985  | Inverse variance weighted | 6  | 0.043  | 0.028 | 1.157E-01 | 0.888 | cis | SARS-CoV-2 infection |
| 5722_78   | Prolylcarboxypeptidase     | Lysosomal Pro-X carboxypeptidase                                           | P42785 | PRCP       | chr11:82970584  | Inverse variance weighted | 3  | 0.042  | 0.027 | 1.184E-01 | 0.888 | cis | SARS-CoV-2 infection |
| 18222_34  | SHLB2                      | Endophilin-B2                                                              | Q9NR46 | SHG3LB2    | chr9:129028331  | Inverse variance weighted | 3  | -0.033 | 0.021 | 1.187E-01 | 0.888 | cis | SARS-CoV-2 infection |
| 18183_3   | ARH                        | Low density lipoprotein receptor adapter protein 1                         | Q5SW96 | LDLRAP1    | chr1:25543606   | Inverse variance weighted | 2  | 0.074  | 0.047 | 1.193E-01 | 0.888 | cis | SARS-CoV-2 infection |
| 17686_27  | TBCB                       | Tubulin-folding cofactor B                                                 | Q99426 | TBCB       | chr19:36114289  | Wald ratio                | 1  | 0.118  | 0.076 | 1.195E-01 | 0.888 | cis | SARS-CoV-2 infection |
| 3314_74   | GFRa-1                     | GNDF family receptor alpha-1                                               | P56159 | GFRFA1     | chr10:116276803 | Wald ratio                | 1  | 0.041  | 0.026 | 1.196E-01 | 0.888 | cis | SARS-CoV-2 infection |
| 2436_49   | CXCL16, soluble            | C-X-C motif chemokine 16                                                   | Q9H2A7 | CXCL16     | chr17:4739928   | Inverse variance weighted | 3  | 0.039  | 0.025 | 1.210E-01 | 0.888 | cis | SARS-CoV-2 infection |
| 3060_43   | C9                         | Complement component C9                                                    | P02748 | C9         | chr5:39371324   | Inverse variance weighted | 5  | -0.036 | 0.023 | 1.211E-01 | 0.888 | cis | SARS-CoV-2 infection |
| 3352_80   | Carbonic anhydrase 6       | Carbonic anhydrase 6                                                       | P23280 | CA6        | chr1:8945867    | Inverse variance weighted | 6  | -0.015 | 0.010 | 1.213E-01 | 0.888 | cis | SARS-CoV-2 infection |
| 10916_44  | PLA2R                      | Secretory phospholipase A2 receptor                                        | Q13018 | PLA2R1     | chr2:160062615  | Inverse variance weighted | 6  | 0.014  | 0.009 | 1.216E-01 | 0.888 | cis | SARS-CoV-2 infection |
| 14054_17  | IL-15 Ra                   | Interleukin-15 receptor subunit alpha                                      | Q13261 | IL15RA     | chr10:5978187   | Inverse variance weighted | 5  | 0.022  | 0.014 | 1.220E-01 | 0.888 | cis | SARS-CoV-2 infection |
| 3175_51   | ATS13                      | A disintegrin and metalloproteinase with thrombospondin motifs 13          | Q76LX8 | ADAMTS13   | chr9:133414358  | Inverse variance weighted | 7  | 0.016  | 0.010 | 1.226E-01 | 0.888 | cis | SARS-CoV-2 infection |
| 17765_3   | SPN1                       | Snurportin-1                                                               | O95149 | SNUPN      | chr15:75626469  | Wald ratio                | 1  | 0.059  | 0.038 | 1.228E-01 | 0.888 | cis | SARS-CoV-2 infection |
| 9329_28   | TRML1:ECD                  | Trem-like transcript 1 protein:Extracellular domain, Ig-like V-type domain | Q86VW5 | TREML1     | chr6:41154347   | Inverse variance weighted | 2  | -0.067 | 0.044 | 1.249E-01 | 0.888 | cis | SARS-CoV-2 infection |
| 3151_6    | IL-2 sRa                   | Interleukin-2 receptor subunit alpha                                       | P01589 | IL2RA      | chr10:6062370   | Wald ratio                | 1  | -0.082 | 0.054 | 1.256E-01 | 0.888 | cis | SARS-CoV-2 infection |
| 3029_52   | DC-SIGN                    | CD209 antigen                                                              | Q9NNX6 | CD209      | chr19:7747564   | Inverse variance weighted | 4  | 0.030  | 0.020 | 1.266E-01 | 0.888 | cis | SARS-CoV-2 infection |
| 4971_1    | CATZ                       | Cathepsin Z                                                                | Q9UBR2 | CTSZ       | chr20:59008238  | Inverse variance weighted | 5  | -0.032 | 0.021 | 1.275E-01 | 0.888 | cis | SARS-CoV-2 infection |
| 6713_4    | LRP11                      | Low-density lipoprotein receptor-related protein 11                        | Q86V24 | LRP11      | chr16:149864359 | Inverse variance weighted | 8  | -0.019 | 0.013 | 1.279E-01 | 0.888 | cis | SARS-CoV-2 infection |
| 16605_2   | C1T9A                      | Complement C1q and tumor necrosis factor-related protein 9A                | PC0862 | C1QTNF9    | chr13:24307166  | Wald ratio                | 1  | -0.037 | 0.025 | 1.280E-01 | 0.888 | cis | SARS-CoV-2 infection |
| 17224_12  | MIMEC                      | Mimecan                                                                    | P20774 | OGN        | chr9:92404696   | Inverse variance weighted | 6  | 0.037  | 0.024 | 1.281E-01 | 0.888 | cis | SARS-CoV-2 infection |
| 15585_304 | fibulin 5                  | Fibulin-5                                                                  | Q9UBX5 | FBLN5      | chr14:91947987  | Wald ratio                | 1  | 0.094  | 0.062 | 1.292E-01 | 0.888 | cis | SARS-CoV-2 infection |
| 3651_50   | VEGF sR2                   | Vascular endothelial growth factor receptor 2                              | P35968 | KDR        | chr4:55125595   | Inverse variance weighted | 3  | 0.019  | 0.013 | 1.298E-01 | 0.888 | cis | SARS-CoV-2 infection |
| 3866_7    | SBD5                       | Ribosome maturation protein SBD5                                           | Q9Y3A5 | SBD5       | chr7:6695693    | Wald ratio                | 1  | 0.060  | 0.040 | 1.308E-01 | 0.888 | cis | SARS-CoV-2 infection |
| 11248_43  | HEM4                       | Uroporphyrinogen-III synthase                                              | P10746 | URO5       | chr10:125823258 | Inverse variance weighted | 4  | -0.037 | 0.025 | 1.320E-01 | 0.888 | cis | SARS-CoV-2 infection |
| 13093_6   | SECTM1                     | Secreted and transmembrane protein 1                                       | Q8WWN6 | SECTM1     | chr17:82334074  | Inverse variance weighted | 3  | -0.037 | 0.025 | 1.325E-01 | 0.888 | cis | SARS-CoV-2 infection |
| 17138_8   | GST A1-1                   | Glutathione S-transferase A1                                               | P08263 | GSTA1      | chr6:52803860   | Inverse variance weighted | 6  | 0.024  | 0.016 | 1.339E-01 | 0.888 | cis | SARS-CoV-2 infection |
| 13580_2   | Sperm-associated antigen 2 | UDP-N-acetylhexosamine pyrophosphorylase                                   | Q16222 | UAAP1      | chr1:162561722  | Wald ratio                | 1  | 0.157  | 0.105 | 1.342E-01 | 0.888 | cis | SARS-CoV-2 infection |
| 12498_12  | TX1B3                      | Tax1-binding protein 3                                                     | O14907 | TAX1BP3    | chr17:3668679   | Wald ratio                | 1  | -0.079 | 0.053 | 1.356E-01 | 0.888 | cis | SARS-CoV-2 infection |
| 3296_92   | CNTN2                      | Contactin-2                                                                | Q02246 | CNTN2      | chr1:205042937  | Inverse variance weighted | 9  | 0.020  | 0.013 | 1.358E-01 | 0.888 | cis | SARS-CoV-2 infection |
| 4775_34   | Gelsolin                   | Gelsolin                                                                   | P06396 | GSN        | chr9:121207794  | Inverse variance weighted | 2  | -0.062 | 0.042 | 1.358E-01 | 0.888 | cis | SARS-CoV-2 infection |
| 18386_36  | GLRX1                      | Glutaredoxin-1                                                             | P35754 | GLRX       | chr5:95822726   | Wald ratio                | 1  | -0.128 | 0.086 | 1.360E-01 | 0.888 | cis | SARS-CoV-2 infection |
| 14688_6   | PTN7                       | Tyrosine-protein phosphatase non-receptor type 7                           | P35236 | PTPN7      | chr1:202161588  | Wald ratio                | 1  | -0.154 | 0.103 | 1.366E-01 | 0.888 | cis | SARS-CoV-2 infection |
| 13472_35  | HDHD2                      | Haloacid dehalogenase-like hydrolase domain-containing protein 2           | Q9H0R4 | HDHD2      | chr18:471350500 | Inverse variance weighted | 3  | 0.030  | 0.020 | 1.366E-01 | 0.888 | cis | SARS-CoV-2 infection |
| 5095_21   | K12L4                      | Killer cell immunoglobulin-like receptor 2DL4                              | Q99706 | KIR2DL4    | chr19:54803610  | Inverse variance weighted | 2  | -0.038 | 0.026 | 1.368E-01 | 0.888 | cis | SARS-CoV-2 infection |
| 11969_5   | S100A2                     | Protein S100-A2                                                            | P29034 | S100A2     | chr1:153567890  | Wald ratio                | 1  | -0.168 | 0.113 | 1.370E-01 | 0.888 | cis | SARS-CoV-2 infection |
| 18330_7   | PGM2                       | Phosphoglucomutase-2                                                       | Q96063 | PGM2       | chr4:37826660   | Inverse variance weighted | 3  | -0.032 | 0.021 | 1.379E-01 | 0.888 | cis | SARS-CoV-2 infection |
| 17343_6   | SNPH                       | Synaphilin                                                                 | O15079 | SNPH       | chr20:1266280   | Inverse variance weighted | 2  | 0.082  | 0.056 | 1.383E-01 | 0.888 | cis | SARS-CoV-2 infection |
| 8402_22   | CYT1L                      | Cytokine-like protein 1                                                    | Q9NRR1 | CYT1L      | chr4:5019458    | Inverse variance weighted | 4  | -0.021 | 0.014 | 1.387E-01 | 0.888 | cis | SARS-CoV-2 infection |
| 9837_60   | NAD(P)H dehydrogenase      | NAD(P)H dehydrogenase [quinone] 1                                          | P15559 | NQO1       | chr16:6972668   | Inverse variance weighted | 9  | -0.014 | 0.010 | 1.388E-01 | 0.888 | cis | SARS-CoV-2 infection |
| 3322_52   | LRIG3                      | Leucine-rich repeats and immunoglobulin-like domains protein 3             | Q6UXM1 | LRIG3      | chr12:58920504  | Inverse variance weighted | 6  | -0.020 | 0.014 | 1.397E-01 | 0.888 | cis | SARS-CoV-2 infection |
| 16773_29  | SCUB3                      | Signal peptide, CUB and EGF-like domain-containing protein 3               | Q8IX30 | SCUB3      | chr6:35213956   | Inverse variance weighted | 3  | -0.032 | 0.022 | 1.398E-01 | 0.888 | cis | SARS-CoV-2 infection |
| 13621_31  | AP2A2                      | AP-2 complex subunit alpha-2                                               | O94973 | AP2A2      | chr11:924881    | Wald ratio                | 1  | 0.114  | 0.077 | 1.421E-01 | 0.888 | cis | SARS-CoV-2 infection |
| 9744_139  | DNAA4                      | DnaI homolog subfamily A member 4                                          | Q8WW22 | DNAA4A     | chr15:78264086  | Wald ratio                | 1  | -0.104 | 0.071 | 1.423E-01 | 0.888 | cis | SARS-CoV-2 infection |
| 15471_29  | LIPR2                      | Pancreatic lipase-related protein 2                                        | P54317 | PNLIPRP2   | chr10:116620953 | Inverse variance weighted | 11 | 0.010  | 0.007 | 1.426E-01 | 0.888 | cis | SARS-CoV-2 infection |
| 5713_9    | IFN-lambda 3               | Interferon lambda-3                                                        | Q8I219 | IFNL3      | chr19:39245250  | Wald ratio                | 1  | -0.145 | 0.099 | 1.429E-01 | 0.888 | cis | SARS-CoV-2 infection |
| 7970_315  | NAR3                       | Ecto-ADP-ribosyltransferase 3                                              | Q13508 | ART3       | chr4:76011184   | Inverse variance weighted | 4  | 0.029  | 0.020 | 1.435E-01 | 0.888 | cis | SARS-CoV-2 infection |
| 3378_49   | Kalikrein 7                | Kalikrein-7                                                                | P49862 | KLK7       | chr19:50984099  | Inverse variance weighted | 2  | 0.048  | 0.033 | 1.438E-01 | 0.888 | cis | SARS-CoV-2 infection |
| 5256_86   | PDE5A                      | cGMP-specific 3',5'-cyclic phosphodiesterase                               | O76074 | PDE5A      | chr4:119628804  | Inverse variance weighted | 3  | -0.076 | 0.052 | 1.443E-01 | 0.888 | cis | SARS-CoV-2 infection |
| 17327_3   | CNPY3                      | Protein canopy homolog 3                                                   | Q9BT09 | CNPY3      | chr16:42929480  | Wald ratio                | 1  | 0.128  | 0.088 | 1.446E-01 | 0.888 | cis | SARS-CoV-2 infection |
| 8960_3    | LRAP                       | Endoplasmic reticulum aminopeptidase 2                                     | Q6P179 | ERAP2      | chr5:96875986   | Inverse variance weighted | 4  | -0.015 | 0.011 | 1.446E-01 | 0.888 | cis | SARS-CoV-2 infection |
| 5036_50   | TSG-6                      | Tumor necrosis factor-inducible gene 6 protein                             | P98066 | TNFAIP6    | chr2:151357592  | Inverse variance weighted | 9  | -0.015 | 0.010 | 1.447E-01 | 0.888 | cis | SARS-CoV-2 infection |
| 17140_57  | PDGFD                      | Platelet-derived growth factor D                                           | Q9GZP0 | PDGFD      | chr11:104164379 | Inverse variance weighted | 6  | 0.051  | 0.035 | 1.455E-01 | 0.888 | cis | SARS-CoV-2 infection |
| 4968_50   | CAPG                       | Macrophage-capping protein                                                 | P40121 | CAPG       | chr2:85418432   | Inverse variance weighted | 4  | 0.027  | 0.018 | 1.456E-01 | 0.888 | cis | SARS-CoV-2 infection |
| 12457_10  | MTND                       | 1,2-dihydroxy-3-keto-5-methylthiopentane dioxigenase                       | Q9BV57 | ADI1       | chr2:3519531    | Wald ratio                | 1  | -0.091 | 0.062 | 1.463E-01 | 0.888 | cis | SARS-CoV-2 infection |
| 5749_53   | COL                        | Collipase                                                                  | P04118 | CLP5       | chr6:35797344   | Inverse variance weighted | 10 | -0.021 | 0.014 | 1.482E-01 | 0.888 | cis | SARS-CoV-2 infection |
| 18197_97  | KCR5                       | Creatine kinase S-type, mitochondrial                                      | P17540 | CKMT2      | chr5:81233320   | Wald ratio                | 1  | 0.141  | 0.097 | 1.484E-01 | 0.888 | cis | SARS-CoV-2 infection |
| 2968_61   | TNFSF15                    | Tumor necrosis factor ligand superfamily member 15                         | O95150 | TNFSF15    | chr9:114806039  | Wald ratio                | 1  | -0.131 | 0.091 | 1.498E-01 | 0.888 | cis | SARS-CoV-2 infection |
| 7228_2    | SIA7F                      | Alpha-N-acetylgalactosaminide alpha-2,6-sialyltransferase 6                | Q969X2 | ST6GALNAC6 | chr9:127905408  | Inverse variance weighted | 2  | -0.083 | 0.058 | 1.504E-01 | 0.888 | cis | SARS-CoV-2 infection |
| 18173_11  | ARK73                      | Aflatoxin B1 aldehyde reductase member 3                                   | O95154 | AKR7A3     | chr1:19288770   | Inverse variance weighted | 5  | 0.032  | 0.022 | 1.504E-01 | 0.888 | cis | SARS-CoV-2 infection |
| 4920_10   | Lysozyme                   | Lysozyme C                                                                 | P61626 | LYZ        | chr12:69348381  | Inverse variance weighted | 6  | -0.017 | 0.012 | 1.506E-01 | 0.888 | cis | SARS-CoV-2 infection |
| 15449_33  | TIM-4                      | T-cell immunoglobulin and mucin domain-containing protein 4                | Q96H15 | TIMD4      | chr5:156963226  | Inverse variance weighted | 5  | -0.049 | 0.034 | 1.516E-01 | 0.888 | cis | SARS-CoV-2 infection |
| 3508_78   | MDC                        | C-C motif chemokine 22                                                     | O00626 | CCL22      | chr16:57358783  | Inverse variance weighted | 5  | -0.038 | 0.027 | 1.522E-01 | 0.888 | cis | SARS-CoV-2 infection |
| 18235_16  | PGP                        | Glycerol-3-phosphate phosphatase                                           | A6NDG6 | PGP        | chr16:2214840   | Inverse variance weighted | 3  | 0.042  | 0.030 | 1.522E-01 | 0.888 | cis | SARS-CoV-2 infection |
| 5107_7    | Notch 1                    | Neurogenic locus notch homolog protein 1                                   | P46531 | NOTCH1     | chr9:136546048  | Inverse variance weighted | 2  | 0.059  | 0.041 | 1.533E-01 | 0.888 | cis | SARS-CoV-2 infection |
| 3066_12   | Galectin-3                 | Galectin-3                                                                 | P17931 | LGALS3     | chr14:55124110  | Inverse variance weighted | 4  | -0.025 | 0.018 | 1.535E-01 | 0.888 | cis | SARS-CoV-2 infection |
| 18832_65  | SAA2                       | Serum amyloid A-2 protein                                                  | P0DI09 | SAA2       | chr11:18248668  | Wald ratio                | 1  | -0.143 | 0.100 | 1.535E-01 | 0.888 | cis | SARS-CoV-2 infection |
| 18340_2   | Proteasome beta chain      | Proteasome subunit beta type-4                                             | P28070 | PSMB8      | chr1:151399560  | Inverse variance weighted | 4  | -0.014 | 0.010 | 1.538E-01 | 0.888 | cis | SARS-CoV-2 infection |
| 9275_2    | Siglec-5                   | Sialic acid-binding Ig-like lectin 5                                       | O15389 | SIGLEC5    | chr19:51630401  | Wald ratio                | 1  | -0.134 | 0.094 | 1.544E-01 | 0.888 | cis | SARS-CoV-2 infection |
| 7955_195  | ITI heavy chain H1         | Inter-alpha-trypsin inhibitor heavy chain H1                               | P19827 | ITIH1      | chr3:52777595   | Inverse variance weighted | 7  | 0.042  | 0.030 | 1.544E-01 | 0.888 | cis | SARS-CoV-2 infection |
| 8024_64   | TPST2                      | Protein-tyrosine sulfotransferase 2                                        | O60704 | TPST2      | chr22:26596717  | Inverse variance weighted | 2  | 0.043  | 0.030 | 1.552E-01 | 0.888 | cis | SARS-CoV-2 infection |
| 12820_1   | GRAP                       | GRB2-related adapter protein                                               | Q13588 | GRAP       | chr17:19047011  | Wald ratio                | 1  | 0.181  | 0.127 | 1.553E-01 | 0.888 | cis | SARS-CoV-2 infection |
| 18241_18  | HEM6                       | Oxygen-dependent coproporphyrinogen-III oxidase, mitochondrial             | P36551 | CPOX       | chr3:98593648   | Inverse variance weighted | 4  | -0.038 | 0.027 | 1.567E-01 | 0.888 | cis | SARS-CoV-2 infection |
| 3195_50   | Granulysin                 | Granulysin                                                                 | P22749 | GNLY       | chr2:85685175   | Inverse variance weighted | 7  | -0.020 | 0.014 | 1.572E-01 | 0.888 | cis | SARS-CoV-2 infection |
| 9263_57   | SIAE                       | Sialate O-acetyltransferase                                                | Q9HAT2 | SIAE       | chr11:124695707 | Wald ratio                | 1  | 0.072  | 0.051 | 1.576E-01 | 0.888 | cis | SARS-CoV-2 infection |
| 2979_8    | ENA-78                     | C-X-C motif chemokine 5                                                    | P42830 | CXCL5      | chr4:73998677   | Wald ratio                | 1  | 0.181  | 0.128 | 1.583E-01 | 0.888 | cis | SARS-CoV-2 infection |
| 9244_27   | PPT1                       | Palmitoyl-protein thioesterase 1                                           | P50897 | PPT1       | chr1:40097260   | Inverse variance weighted | 2  | 0.031  | 0.022 | 1.591E-01 | 0.888 | cis | SARS-CoV-2 infection |

|           |                              |                                                                  |        |           |                 |                           |    |        |       |           |       |     |                      |
|-----------|------------------------------|------------------------------------------------------------------|--------|-----------|-----------------|---------------------------|----|--------|-------|-----------|-------|-----|----------------------|
| 16792_4   | Siglec-5                     | Sialic acid-binding Ig-like lectin 5                             | O15389 | SIGLEC5   | chr19:51630401  | Inverse variance weighted | 5  | -0.020 | 0.014 | 1.606E-01 | 0.888 | cis | SARS-CoV-2 infection |
| 15516_12  | SAA-4                        | Serum amyloid A-4 protein                                        | P35542 | SAA4      | chr11:18236802  | Inverse variance weighted | 7  | 0.011  | 0.008 | 1.612E-01 | 0.888 | cis | SARS-CoV-2 infection |
| 12475_48  | CLIC5                        | Chloride intracellular channel protein 5                         | Q9N2A1 | CLIC5     | chr6:46080348   | Inverse variance weighted | 5  | 0.031  | 0.022 | 1.617E-01 | 0.888 | cis | SARS-CoV-2 infection |
| 4982_54   | Elafin                       | Elafin                                                           | P19957 | PI3       | chr20:45174902  | Inverse variance weighted | 5  | 0.037  | 0.026 | 1.619E-01 | 0.888 | cis | SARS-CoV-2 infection |
| 12940_35  | AL381                        | Aldehyde dehydrogenase family 3 member B1                        | P43353 | ALDH3B1   | chr11:68008578  | Wald ratio                | 1  | 0.057  | 0.041 | 1.619E-01 | 0.888 | cis | SARS-CoV-2 infection |
| 12657_2   | FCL                          | GDP-L-fucose synthase                                            | Q13630 | GFUS      | chr8:143618048  | Wald ratio                | 1  | -0.157 | 0.112 | 1.620E-01 | 0.888 | cis | SARS-CoV-2 infection |
| 18382_109 | Catechol O-methyltransferase | Catechol O-methyltransferase                                     | P21964 | COMT      | chr22:19941371  | Wald ratio                | 1  | -0.078 | 0.056 | 1.621E-01 | 0.888 | cis | SARS-CoV-2 infection |
| 3232_28   | TrATPase                     | Tartrate-resistant acid phosphatase type 5                       | P13686 | ACP5      | chr19:11579993  | Inverse variance weighted | 4  | 0.028  | 0.020 | 1.625E-01 | 0.888 | cis | SARS-CoV-2 infection |
| 2977_7    | EDAR                         | Tumor necrosis factor receptor superfamily member EDAR           | Q9UNE0 | EDAR      | chr2:108989372  | Inverse variance weighted | 7  | -0.015 | 0.011 | 1.632E-01 | 0.888 | cis | SARS-CoV-2 infection |
| 4125_52   | sRAGE                        | Advanced glycosylation end product-specific receptor, soluble    | Q15109 | AGER      | chr6:32184322   | Inverse variance weighted | 2  | 0.029  | 0.021 | 1.637E-01 | 0.888 | cis | SARS-CoV-2 infection |
| 19334_62  | TXD12                        | Thioredoxin domain-containing protein 12                         | O95881 | TXNDC12   | chr1:52055191   | Wald ratio                | 1  | 0.081  | 0.058 | 1.644E-01 | 0.888 | cis | SARS-CoV-2 infection |
| 13044_5   | TS101                        | Tumor susceptibility gene 101 protein                            | Q99816 | TSG101    | chr11:18526951  | Inverse variance weighted | 2  | -0.072 | 0.052 | 1.647E-01 | 0.888 | cis | SARS-CoV-2 infection |
| 13125_45  | Vitronectin                  | Vitronectin                                                      | P04004 | VTN       | chr17:28373091  | Inverse variance weighted | 9  | 0.013  | 0.009 | 1.652E-01 | 0.888 | cis | SARS-CoV-2 infection |
| 5487_7    | SLAF7                        | SLAM family member 7                                             | Q9NQ25 | SLAMF7    | chr1:160739057  | Inverse variance weighted | 7  | -0.015 | 0.011 | 1.656E-01 | 0.888 | cis | SARS-CoV-2 infection |
| 17231_1   | L-plastin                    | Plastin-2                                                        | P13796 | LCP1      | chr13:46211871  | Inverse variance weighted | 4  | 0.038  | 0.028 | 1.667E-01 | 0.888 | cis | SARS-CoV-2 infection |
| 5005_4    | MK12                         | Mitogen-activated protein kinase 12                              | P53778 | MAPK12    | chr22:50261716  | Wald ratio                | 1  | -0.104 | 0.075 | 1.671E-01 | 0.888 | cis | SARS-CoV-2 infection |
| 18175_65  | VAT1                         | Synaptic vesicle membrane protein VAT-1 homolog                  | Q99536 | VAT1      | chr17:43025123  | Wald ratio                | 1  | -0.209 | 0.151 | 1.675E-01 | 0.888 | cis | SARS-CoV-2 infection |
| 17370_186 | ABHDA                        | Mycoprenolic acid acyl-glucuronide esterase, mitochondrial       | Q9NUJ1 | ABHD10    | chr3:111979010  | Wald ratio                | 1  | -0.132 | 0.096 | 1.676E-01 | 0.888 | cis | SARS-CoV-2 infection |
| 13934_3   | MCFL2                        | Guanine nucleotide exchange factor DBS                           | O15068 | MCFL2     | chr13:112894378 | Wald ratio                | 1  | -0.032 | 0.023 | 1.682E-01 | 0.888 | cis | SARS-CoV-2 infection |
| 11656_110 | EVL                          | Ena/VASP-like protein                                            | Q9UI08 | EVL       | chr14:99971449  | Inverse variance weighted | 4  | 0.055  | 0.040 | 1.684E-01 | 0.888 | cis | SARS-CoV-2 infection |
| 4430_44   | Collectin Kidney 1           | Collectin-11                                                     | Q9BWV8 | COLEC11   | chr2:3594832    | Inverse variance weighted | 10 | 0.013  | 0.009 | 1.708E-01 | 0.888 | cis | SARS-CoV-2 infection |
| 11308_8   | CR3L4                        | Cyclic AMP-responsive element-binding protein 3-like protein 4   | Q8TEY5 | CREB3L4   | chr1:153967534  | Inverse variance weighted | 2  | 0.040  | 0.029 | 1.711E-01 | 0.888 | cis | SARS-CoV-2 infection |
| 9557_5    | MANS1                        | MANSC domain-containing protein 1                                | Q9HRJ5 | MANS1     | chr12:12350242  | Inverse variance weighted | 3  | 0.036  | 0.026 | 1.717E-01 | 0.888 | cis | SARS-CoV-2 infection |
| 5825_49   | IFN-g R1                     | Interferon gamma receptor 1                                      | P15260 | IFNGR1    | chr6:137219449  | Inverse variance weighted | 3  | -0.070 | 0.051 | 1.719E-01 | 0.888 | cis | SARS-CoV-2 infection |
| 9266_1    | sTREM-1                      | Triggering receptor expressed on myeloid cells 1                 | Q9NPP9 | TREM1     | chr6:41286682   | Inverse variance weighted | 6  | 0.030  | 0.022 | 1.721E-01 | 0.888 | cis | SARS-CoV-2 infection |
| 13563_259 | ACB07                        | Acyl-CoA-binding domain-containing protein 7                     | Q8NGN7 | ACB07     | chr10:15088776  | Wald ratio                | 1  | 0.174  | 0.127 | 1.721E-01 | 0.888 | cis | SARS-CoV-2 infection |
| 9002_36   | SPA11                        | Serpin A11                                                       | Q86U17 | SERPINA11 | chr14:94452800  | Inverse variance weighted | 5  | -0.038 | 0.028 | 1.725E-01 | 0.888 | cis | SARS-CoV-2 infection |
| 5651_50   | PSG7                         | Putative pregnancy-specific beta-1-glycoprotein 7                | Q13046 | PSG7      | chr19:42937207  | Wald ratio                | 1  | 0.107  | 0.078 | 1.726E-01 | 0.888 | cis | SARS-CoV-2 infection |
| 8664_36   | PKDCC                        | Extracellular tyrosine-protein kinase PKDCC                      | O504Y2 | PKDCC     | chr2:42048021   | Inverse variance weighted | 2  | -0.174 | 0.128 | 1.732E-01 | 0.888 | cis | SARS-CoV-2 infection |
| 12347_29  | CCM2                         | Cerebral cavernous malformations 2 protein                       | Q9BSQ5 | CCM2      | chr7:44999475   | Wald ratio                | 1  | -0.106 | 0.078 | 1.733E-01 | 0.888 | cis | SARS-CoV-2 infection |
| 5462_62   | Ficolin-3                    | Ficolin-3                                                        | O75636 | FCN3      | chr1:27374824   | Inverse variance weighted | 7  | -0.015 | 0.011 | 1.738E-01 | 0.888 | cis | SARS-CoV-2 infection |
| 3415_61   | BSP                          | Bone sialoprotein 2                                              | P21815 | IBSP      | chr4:87799554   | Wald ratio                | 1  | -0.065 | 0.048 | 1.749E-01 | 0.888 | cis | SARS-CoV-2 infection |
| 14100_63  | CIQC                         | Complement C1q subcomponent subunit C                            | P02747 | CIQC      | chr1:22643014   | Inverse variance weighted | 9  | 0.022  | 0.016 | 1.753E-01 | 0.888 | cis | SARS-CoV-2 infection |
| 5078_82   | EphB6                        | Ephrin type-B receptor 6                                         | O15197 | EPHB6     | chr7:142855061  | Inverse variance weighted | 3  | -0.031 | 0.023 | 1.754E-01 | 0.888 | cis | SARS-CoV-2 infection |
| 18398_1   | AK1D1                        | 3-oxo-5-beta-steroid 4-dehydrogenase                             | P51857 | AKR1D1    | chr7:138002324  | Wald ratio                | 1  | 0.136  | 0.100 | 1.755E-01 | 0.888 | cis | SARS-CoV-2 infection |
| 2611_72   | Dtk                          | Tyrosine-protein kinase receptor TYRO3                           | Q06418 | TYRO3     | chr15:41557675  | Wald ratio                | 1  | 0.066  | 0.048 | 1.758E-01 | 0.888 | cis | SARS-CoV-2 infection |
| 11192_168 | TINAL                        | Tubulointerstitial nephritis antigen-like                        | Q9GZM7 | TINAGL1   | chr1:31576485   | Wald ratio                | 1  | -0.067 | 0.050 | 1.761E-01 | 0.888 | cis | SARS-CoV-2 infection |
| 8289_8    | GNPMB-ECD                    | Transmembrane glycoprotein NMB-Extracellular domain              | Q14956 | GNPMB     | chr7:23235967   | Inverse variance weighted | 5  | 0.026  | 0.019 | 1.762E-01 | 0.888 | cis | SARS-CoV-2 infection |
| 18884_22  | DNJB4                        | DnaI homolog subfamily B member 4                                | Q9UDY4 | DNABJ4    | chr1:77979175   | Inverse variance weighted | 3  | 0.038  | 0.028 | 1.769E-01 | 0.888 | cis | SARS-CoV-2 infection |
| 9713_67   | PGFRL                        | Platelet-derived growth factor receptor-like protein             | Q15198 | PDGFRL    | chr8:17576433   | Inverse variance weighted | 6  | -0.018 | 0.013 | 1.776E-01 | 0.888 | cis | SARS-CoV-2 infection |
| 17786_5   | GGP5                         | Geranylgeranyl pyrophosphate synthase                            | O95749 | GGP51     | chr1:235327350  | Wald ratio                | 1  | 0.074  | 0.055 | 1.781E-01 | 0.888 | cis | SARS-CoV-2 infection |
| 13669_6   | FGFR-3-ECD                   | Fibroblast growth factor receptor 3:Extracellular domain         | P22607 | FGFR3     | chr4:1793293    | Inverse variance weighted | 4  | -0.058 | 0.043 | 1.793E-01 | 0.888 | cis | SARS-CoV-2 infection |
| 14151_4   | UCRP                         | Ubiquitin-like protein ISG15                                     | P05161 | ISG15     | chr1:1001138    | Inverse variance weighted | 2  | 0.020  | 0.015 | 1.794E-01 | 0.888 | cis | SARS-CoV-2 infection |
| 13423_94  | CJ058                        | Redox-regulatory protein FAM213A                                 | Q9BRX8 | PRXL2A    | chr10:80407829  | Wald ratio                | 1  | 0.135  | 0.101 | 1.814E-01 | 0.888 | cis | SARS-CoV-2 infection |
| 12422_143 | LX15B                        | Arachidonate 15-lipoxygenase B                                   | O15296 | ALOX15B   | chr17:8039034   | Wald ratio                | 1  | 0.088  | 0.066 | 1.822E-01 | 0.888 | cis | SARS-CoV-2 infection |
| 12381_26  | CBR1                         | Carbonyl reductase [NADPH] 1                                     | P16152 | CBR1      | chr21:36069941  | Inverse variance weighted | 5  | 0.022  | 0.016 | 1.826E-01 | 0.888 | cis | SARS-CoV-2 infection |
| 19213_1   | ISK4                         | Serine protease inhibitor Kazal-type 4                           | O60575 | SPINK4    | chr9:33218365   | Wald ratio                | 1  | -0.031 | 0.023 | 1.826E-01 | 0.888 | cis | SARS-CoV-2 infection |
| 5727_35   | B3GLT                        | Beta-1,3-glucosyltransferase                                     | Q6Y288 | B3GLCT    | chr13:31199975  | Inverse variance weighted | 2  | 0.031  | 0.023 | 1.833E-01 | 0.888 | cis | SARS-CoV-2 infection |
| 3622_33   | LGMN                         | Legumain                                                         | Q99538 | LGMN      | chr14:92748679  | Inverse variance weighted | 3  | 0.035  | 0.026 | 1.833E-01 | 0.888 | cis | SARS-CoV-2 infection |
| 12575_30  | C1TC                         | C-1-tetrahydrofolate synthase, cytoplasmic                       | P11586 | MTFHD1    | chr14:64388031  | Inverse variance weighted | 2  | 0.071  | 0.053 | 1.835E-01 | 0.888 | cis | SARS-CoV-2 infection |
| 6227_1    | kallikrein 10                | Kallikrein-10                                                    | O43240 | KLK10     | chr19:51020175  | Inverse variance weighted | 6  | 0.038  | 0.029 | 1.836E-01 | 0.888 | cis | SARS-CoV-2 infection |
| 12685_57  | HOME2                        | Homer protein homolog 2                                          | Q9N588 | HOMER2    | chr15:82986153  | Wald ratio                | 1  | 0.093  | 0.070 | 1.839E-01 | 0.888 | cis | SARS-CoV-2 infection |
| 3803_10   | CYT0                         | Cystatin-D                                                       | P28325 | CST5      | chr20:23879748  | Inverse variance weighted | 11 | 0.025  | 0.019 | 1.841E-01 | 0.888 | cis | SARS-CoV-2 infection |
| 4158_54   | uPA                          | Urokinase-type plasminogen activator                             | P00749 | PLAU      | chr10:73909177  | Inverse variance weighted | 4  | -0.022 | 0.016 | 1.847E-01 | 0.888 | cis | SARS-CoV-2 infection |
| 15620_4   | NLGN1                        | Neuroigin-1                                                      | Q8N2Q7 | NLGN1     | chr3:173996284  | Inverse variance weighted | 3  | 0.048  | 0.036 | 1.849E-01 | 0.888 | cis | SARS-CoV-2 infection |
| 3316_58   | Heparin cofactor II          | Heparin cofactor 2                                               | P05546 | SERPIND1  | chr22:20774113  | Wald ratio                | 1  | 0.136  | 0.103 | 1.853E-01 | 0.888 | cis | SARS-CoV-2 infection |
| 9772_153  | NLGN2-ECD                    | Neuroigin-2:Extracellular domain                                 | Q8NF24 | NLGN2     | chr17:7404874   | Inverse variance weighted | 2  | 0.071  | 0.054 | 1.858E-01 | 0.888 | cis | SARS-CoV-2 infection |
| 2831_29   | Kallikrein 11                | Kallikrein-11                                                    | Q9UBX7 | KLK11     | chr19:51028039  | Inverse variance weighted | 7  | 0.032  | 0.024 | 1.859E-01 | 0.888 | cis | SARS-CoV-2 infection |
| 16070_7   | WIF-1                        | Wnt inhibitory factor 1                                          | Q9YSW5 | WIF1      | chr12:65121305  | Wald ratio                | 1  | -0.105 | 0.079 | 1.867E-01 | 0.890 | cis | SARS-CoV-2 infection |
| 9249_17   | TMEM9-ECD                    | Transmembrane protein 9:Extracellular domain                     | Q9P077 | TMEM9     | chr1:2011171574 | Wald ratio                | 1  | -0.096 | 0.073 | 1.889E-01 | 0.890 | cis | SARS-CoV-2 infection |
| 9173_21   | PGM1                         | Phosphoglucomutase-1                                             | P36871 | PGM1      | chr1:63593411   | Inverse variance weighted | 2  | 0.059  | 0.045 | 1.892E-01 | 0.890 | cis | SARS-CoV-2 infection |
| 11510_31  | Apo L1                       | Apolipoprotein L1                                                | O14791 | APOL1     | chr22:36253071  | Inverse variance weighted | 5  | -0.017 | 0.013 | 1.894E-01 | 0.890 | cis | SARS-CoV-2 infection |
| 6923_1    | PLOD2                        | Procollagen-lysine, 2-oxoglutarate 5-dioxygenase 2               | O00469 | PLOD2     | chr3:146163725  | Inverse variance weighted | 2  | 0.066  | 0.051 | 1.900E-01 | 0.890 | cis | SARS-CoV-2 infection |
| 4535_50   | BST1                         | ADP-ribosyl cyclase/cyclic ADP-ribose hydrolase 2                | O10588 | BST1      | chr4:15703065   | Inverse variance weighted | 11 | -0.008 | 0.006 | 1.901E-01 | 0.890 | cis | SARS-CoV-2 infection |
| 8014_359  | MANEA                        | Glycoprotein endo-alpha-1,2-mannosidase                          | Q5SR19 | MANEA     | chr6:95577485   | Inverse variance weighted | 6  | -0.010 | 0.007 | 1.904E-01 | 0.890 | cis | SARS-CoV-2 infection |
| 3376_49   | IL-17 RD                     | Interleukin-17 receptor D                                        | Q8NFM7 | IL17RD    | chr3:57170306   | Inverse variance weighted | 4  | -0.017 | 0.013 | 1.904E-01 | 0.890 | cis | SARS-CoV-2 infection |
| 12424_107 | THYN1                        | Thymocyte nuclear protein 1                                      | Q9P016 | THYN1     | chr11:134253370 | Wald ratio                | 1  | 0.126  | 0.097 | 1.911E-01 | 0.890 | cis | SARS-CoV-2 infection |
| 8275_31   | PEAR1-ECD                    | Platelet endothelial aggregation receptor 1:Extracellular domain | Q5V43  | PEAR1     | chr1:156893698  | Inverse variance weighted | 4  | -0.030 | 0.023 | 1.917E-01 | 0.891 | cis | SARS-CoV-2 infection |
| 15391_114 | GA5-6                        | Growth arrest-specific protein 6                                 | Q14393 | GA56      | chr13:113864076 | Inverse variance weighted | 4  | -0.023 | 0.018 | 1.935E-01 | 0.892 | cis | SARS-CoV-2 infection |
| 14079_14  | IL-18 Ra                     | Interleukin-18 receptor 1                                        | Q13478 | IL18R1    | chr2:102311529  | Inverse variance weighted | 5  | -0.024 | 0.019 | 1.936E-01 | 0.892 | cis | SARS-CoV-2 infection |
| 10903_50  | STX8                         | Syntaxin-8                                                       | Q9UNK0 | STX8      | chr17:9576591   | Wald ratio                | 1  | -0.101 | 0.078 | 1.948E-01 | 0.892 | cis | SARS-CoV-2 infection |
| 7083_74   | MATN4                        | Matrilin-4                                                       | O95460 | MATN4     | chr20:45308529  | Inverse variance weighted | 3  | 0.036  | 0.027 | 1.950E-01 | 0.892 | cis | SARS-CoV-2 infection |
| 9580_5    | Laminin gamma-2              | Laminin subunit gamma-2                                          | Q13753 | LAMC2     | chr1:183186238  | Inverse variance weighted | 5  | -0.018 | 0.014 | 1.952E-01 | 0.892 | cis | SARS-CoV-2 infection |
| 3905_62   | UBE2N                        | Ubiquitin-conjugating enzyme E2 N                                | P16088 | UBE2N     | chr12:93441947  | Wald ratio                | 1  | -0.131 | 0.101 | 1.955E-01 | 0.892 | cis | SARS-CoV-2 infection |
| 4913_78   | HCC-4                        | C-C motif chemokine 16                                           | O15467 | CC16      | chr17:35981497  | Inverse variance weighted | 8  | -0.014 | 0.011 | 1.962E-01 | 0.892 | cis | SARS-CoV-2 infection |
| 5000_52   | LG3BP                        | Galectin-3-binding protein                                       | Q08380 | LGALS3BP  | chr17:78979947  | Inverse variance weighted | 3  | -0.048 | 0.037 | 1.963E-01 | 0.892 | cis | SARS-CoV-2 infection |
| 15583_18  | FCRLB                        | Fc receptor-like B                                               | Q6BAA4 | FCRLB     | chr1:161721544  | Inverse variance weighted | 5  | 0.033  | 0.026 | 1.971E-01 | 0.893 | cis | SARS-CoV-2 infection |
| 11241_8   | ARLY                         | Argininosuccinate lyase                                          | P04424 | ASL       | chr7:66075800   | Inverse variance weighted | 3  | -0.044 | 0.034 | 1.982E-01 | 0.896 | cis | SARS-CoV-2 infection |

|           |                        |                                                                                                                                    |        |           |                 |                           |    |        |       |           |       |     |                      |
|-----------|------------------------|------------------------------------------------------------------------------------------------------------------------------------|--------|-----------|-----------------|---------------------------|----|--------|-------|-----------|-------|-----|----------------------|
| 6551_94   | Vaspin                 | Serpin A12                                                                                                                         | Q8IW75 | SERPINA12 | chr14:94517844  | Inverse variance weighted | 5  | -0.017 | 0.013 | 1.997E-01 | 0.899 | cis | SARS-CoV-2 infection |
| 13242_134 | SHAN3                  | SH3 and multiple ankyrin repeat domains protein 3                                                                                  | Q9BY80 | SHANK3    | chr22:50674415  | Inverse variance weighted | 5  | -0.020 | 0.015 | 2.000E-01 | 0.899 | cis | SARS-CoV-2 infection |
| 14618_26  | ECOP                   | Vesicular, overexpressed in cancer, prosurvival protein 1                                                                          | Q96AW1 | VOPP1     | chr7:55572988   | Inverse variance weighted | 2  | -0.056 | 0.044 | 2.011E-01 | 0.900 | cis | SARS-CoV-2 infection |
| 5615_62   | F172A                  | Protein FAM172A                                                                                                                    | Q8WU68 | FAM172A   | chr5:94111699   | Wald ratio                | 1  | -0.093 | 0.073 | 2.013E-01 | 0.900 | cis | SARS-CoV-2 infection |
| 13552_7   | SWP70                  | Switch-associated protein 70                                                                                                       | Q9UH65 | SWAP70    | chr11:9664077   | Inverse variance weighted | 5  | -0.014 | 0.011 | 2.025E-01 | 0.901 | cis | SARS-CoV-2 infection |
| 13405_61  | ISK2                   | Serine protease inhibitor Kazal-type 2                                                                                             | P20155 | SPINK2    | chr4:56821742   | Inverse variance weighted | 5  | -0.015 | 0.012 | 2.026E-01 | 0.901 | cis | SARS-CoV-2 infection |
| 15385_116 | FABP2                  | Fatty acid-binding protein, intestinal                                                                                             | P12104 | FABP2     | chr4:119322138  | Inverse variance weighted | 5  | 0.017  | 0.013 | 2.032E-01 | 0.901 | cis | SARS-CoV-2 infection |
| 17329_2   | BDH2                   | 3-hydroxybutyrate dehydrogenase type 2                                                                                             | Q9BU11 | BDH2      | chr4:103099870  | Inverse variance weighted | 2  | 0.036  | 0.029 | 2.036E-01 | 0.901 | cis | SARS-CoV-2 infection |
| 5660_51   | SOD3                   | Extracellular superoxide dismutase [Cu-Zn]                                                                                         | P08294 | SOD3      | chr4:24789912   | Inverse variance weighted | 10 | -0.014 | 0.011 | 2.052E-01 | 0.905 | cis | SARS-CoV-2 infection |
| 17724_3   | WWOX                   | WW domain-containing oxidoreductase                                                                                                | Q9NZC7 | WWOX      | chr16:78099400  | Wald ratio                | 1  | -0.084 | 0.067 | 2.060E-01 | 0.905 | cis | SARS-CoV-2 infection |
| 8356_88   | NEU1                   | Oxytocin-neurophysin 1                                                                                                             | P01178 | OXT       | chr20:3071620   | Inverse variance weighted | 3  | 0.029  | 0.023 | 2.067E-01 | 0.905 | cis | SARS-CoV-2 infection |
| 18841_1   | SPB13                  | Serpin B13                                                                                                                         | Q9UIV8 | SERPINB13 | chr18:63586989  | Inverse variance weighted | 4  | 0.031  | 0.025 | 2.072E-01 | 0.905 | cis | SARS-CoV-2 infection |
| 2992_59   | IL-17 sR               | Interleukin-17 receptor A                                                                                                          | Q96F46 | IL17RA    | chr22:17084954  | Inverse variance weighted | 8  | -0.007 | 0.006 | 2.078E-01 | 0.905 | cis | SARS-CoV-2 infection |
| 3853_56   | MDHC                   | Malate dehydrogenase, cytoplasmic                                                                                                  | P40925 | MDH1      | chr2:63588609   | Wald ratio                | 1  | -0.086 | 0.068 | 2.084E-01 | 0.905 | cis | SARS-CoV-2 infection |
| 12494_99  | GBRL2                  | Gamma-aminobutyric acid receptor-associated protein-like 2                                                                         | P60520 | GABARAPL2 | chr16:75566375  | Wald ratio                | 1  | -0.078 | 0.062 | 2.098E-01 | 0.905 | cis | SARS-CoV-2 infection |
| 14012_17  | LGP2                   | Probable ATP-dependent RNA helicase DHX58                                                                                          | Q96C10 | DHX58     | chr17:42112714  | Inverse variance weighted | 2  | -0.055 | 0.044 | 2.101E-01 | 0.905 | cis | SARS-CoV-2 infection |
| 8992_1    | TMEM2                  | Transmembrane protein 2                                                                                                            | Q9UHN6 | CEMP12    | chr9:71816690   | Inverse variance weighted | 2  | -0.038 | 0.030 | 2.106E-01 | 0.905 | cis | SARS-CoV-2 infection |
| 15495_9   | FOLR3                  | Folate receptor gamma                                                                                                              | P41439 | FOLR3     | chr11:72114869  | Inverse variance weighted | 9  | 0.016  | 0.013 | 2.113E-01 | 0.905 | cis | SARS-CoV-2 infection |
| 13416_8   | T132D                  | Transmembrane protein 132D                                                                                                         | Q14C87 | TMEM132D  | chr12:129904025 | Inverse variance weighted | 6  | 0.021  | 0.017 | 2.126E-01 | 0.905 | cis | SARS-CoV-2 infection |
| 14067_6   | PKP2                   | Plakophilin-2                                                                                                                      | Q99559 | PKP2      | chr12:32896777  | Inverse variance weighted | 2  | 0.071  | 0.057 | 2.132E-01 | 0.905 | cis | SARS-CoV-2 infection |
| 11659_31  | EPNA                   | Clathrin interactor 1                                                                                                              | Q14677 | CLINT1    | chr5:157859145  | Wald ratio                | 1  | -0.115 | 0.093 | 2.146E-01 | 0.905 | cis | SARS-CoV-2 infection |
| 16900_29  | MDGA1                  | MAM domain-containing glycosylphosphatidylinositol anchor protein 1                                                                | Q8NF44 | MDGA1     | chr6:37699306   | Inverse variance weighted | 8  | -0.010 | 0.008 | 2.149E-01 | 0.905 | cis | SARS-CoV-2 infection |
| 5632_6    | CRAC1                  | Cartilage acidic protein 1                                                                                                         | Q9NQ79 | CRTA1     | chr10:98030828  | Inverse variance weighted | 9  | -0.015 | 0.012 | 2.149E-01 | 0.905 | cis | SARS-CoV-2 infection |
| 2999_6    | LSAMP                  | Limbic system-associated membrane protein                                                                                          | Q13449 | LSAMP     | chr3:117139389  | Inverse variance weighted | 4  | -0.036 | 0.029 | 2.150E-01 | 0.905 | cis | SARS-CoV-2 infection |
| 5618_50   | FAM3B                  | Protein FAM3B                                                                                                                      | P58499 | FAM3B     | chr21:41304212  | Wald ratio                | 1  | 0.082  | 0.066 | 2.153E-01 | 0.905 | cis | SARS-CoV-2 infection |
| 2860_19   | Karyopherin-a2         | Importin subunit alpha-1                                                                                                           | P52292 | KPNA2     | chr17:58035636  | Wald ratio                | 1  | -0.114 | 0.092 | 2.155E-01 | 0.905 | cis | SARS-CoV-2 infection |
| 16809_1   | NDKM                   | Nucleoside diphosphate kinase, mitochondrial                                                                                       | O00746 | NME4      | chr16:396725    | Inverse variance weighted | 2  | 0.078  | 0.063 | 2.155E-01 | 0.905 | cis | SARS-CoV-2 infection |
| 16318_12  | ALK-1                  | Serine/threonine-protein kinase receptor R3                                                                                        | P37023 | ACVRL1    | chr12:51906908  | Inverse variance weighted | 3  | -0.030 | 0.024 | 2.163E-01 | 0.905 | cis | SARS-CoV-2 infection |
| 9409_11   | TRYB1                  | Tryptase beta-1                                                                                                                    | Q15661 | TPSAB1    | chr16:1240379   | Inverse variance weighted | 8  | 0.013  | 0.011 | 2.177E-01 | 0.905 | cis | SARS-CoV-2 infection |
| 13969_24  | IMA7                   | Importin subunit alpha-7                                                                                                           | O60684 | KPNA6     | chr1:32108056   | Wald ratio                | 1  | 0.099  | 0.080 | 2.181E-01 | 0.905 | cis | SARS-CoV-2 infection |
| 17341_89  | THIC                   | Acetyl-CoA acetyltransferase, cytosolic                                                                                            | Q9BWD1 | ACAT2     | chr6:159762045  | Inverse variance weighted | 3  | 0.021  | 0.017 | 2.185E-01 | 0.905 | cis | SARS-CoV-2 infection |
| 12643_4   | ARRB1                  | Beta-arrestin-1                                                                                                                    | P49407 | ARRB1     | chr11:75351705  | Wald ratio                | 1  | -0.078 | 0.064 | 2.206E-01 | 0.905 | cis | SARS-CoV-2 infection |
| 4834_61   | Epithelial cell kinase | Ephrin type-A receptor 2                                                                                                           | P29317 | EPHA2     | chr1:16156069   | Inverse variance weighted | 3  | -0.051 | 0.042 | 2.221E-01 | 0.905 | cis | SARS-CoV-2 infection |
| 9256_78   | NPTX1                  | Neuronal pentraxin-1                                                                                                               | Q15818 | NPTX1     | chr17:80477843  | Inverse variance weighted | 6  | -0.019 | 0.016 | 2.223E-01 | 0.905 | cis | SARS-CoV-2 infection |
| 4126_22   | BPI                    | Bactericidal permeability-increasing protein                                                                                       | P17213 | BPI       | chr20:38304150  | Inverse variance weighted | 9  | 0.009  | 0.008 | 2.224E-01 | 0.905 | cis | SARS-CoV-2 infection |
| 8364_74   | UST                    | Uranyl 2-sulfotransferase                                                                                                          | Q9YZC2 | UST       | chr6:148747030  | Inverse variance weighted | 3  | 0.043  | 0.036 | 2.235E-01 | 0.905 | cis | SARS-CoV-2 infection |
| 14158_17  | Annexin V              | Annexin A5                                                                                                                         | P08758 | ANXA5     | chr4:121696995  | Inverse variance weighted | 2  | 0.034  | 0.028 | 2.236E-01 | 0.905 | cis | SARS-CoV-2 infection |
| 15440_57  | NEC2                   | Neuroendocrine convertase 2                                                                                                        | P16519 | PCSK2     | chr20:17226107  | Wald ratio                | 1  | -0.069 | 0.057 | 2.244E-01 | 0.905 | cis | SARS-CoV-2 infection |
| 12813_18  | EHBP1                  | EH domain-binding protein 1                                                                                                        | Q8ND01 | EHBP1     | chr2:62673851   | Wald ratio                | 1  | 0.122  | 0.100 | 2.246E-01 | 0.905 | cis | SARS-CoV-2 infection |
| 13940_19  | IP16:HN1               | Gamma-interferon-inducible protein 16:isoform 2, Hematopoietic expression, interferon-inducible nature, and nuclear localization 1 | Q16666 | IFI16     | chr1:158999968  | Wald ratio                | 1  | 0.088  | 0.073 | 2.248E-01 | 0.905 | cis | SARS-CoV-2 infection |
| 18213_30  | UBEZF                  | NEDD8-conjugating enzyme UBEZF                                                                                                     | Q969M7 | UBEZF     | chr2:237966827  | Wald ratio                | 1  | -0.085 | 0.070 | 2.248E-01 | 0.905 | cis | SARS-CoV-2 infection |
| 13930_3   | ABC3G                  | DNA dC->dU-editing enzyme APOBEC-3G                                                                                                | Q9HC16 | APOBEC3G  | chr22:39077067  | Inverse variance weighted | 2  | 0.056  | 0.046 | 2.255E-01 | 0.905 | cis | SARS-CoV-2 infection |
| 3810_50   | FRG                    | Tyrosine-protein kinase Fgr                                                                                                        | P09769 | FRG       | chr1:27635185   | Inverse variance weighted | 2  | 0.044  | 0.037 | 2.279E-01 | 0.905 | cis | SARS-CoV-2 infection |
| 3132_1    | VEGF-C                 | Vascular endothelial growth factor C                                                                                               | P49767 | VEGFC     | chr4:176792922  | Inverse variance weighted | 2  | -0.056 | 0.047 | 2.280E-01 | 0.905 | cis | SARS-CoV-2 infection |
| 18831_6   | LRIG1                  | Leucine-rich repeats and immunoglobulin-like domains protein 1                                                                     | Q9G1A1 | LRIG1     | chr3:66501263   | Inverse variance weighted | 8  | -0.016 | 0.013 | 2.289E-01 | 0.905 | cis | SARS-CoV-2 infection |
| 8043_153  | COMP                   | Cartilage oligomeric matrix protein                                                                                                | P49747 | COMP      | chr19:18791305  | Inverse variance weighted | 4  | -0.031 | 0.026 | 2.292E-01 | 0.905 | cis | SARS-CoV-2 infection |
| 15614_168 | LIRA2                  | Leukocyte immunoglobulin-like receptor subfamily A member 2                                                                        | Q8N149 | LIRA2     | chr19:54572920  | Inverse variance weighted | 4  | -0.021 | 0.017 | 2.313E-01 | 0.905 | cis | SARS-CoV-2 infection |
| 5116_62   | ROBO2                  | Roundabout homolog 2                                                                                                               | Q9HKC4 | ROBO2     | chr3:75906695   | Wald ratio                | 1  | -0.136 | 0.114 | 2.314E-01 | 0.905 | cis | SARS-CoV-2 infection |
| 9241_40   | SIRPG                  | Signal-regulatory protein gamma                                                                                                    | Q9P1W8 | SIRPG     | chr20:1657779   | Wald ratio                | 1  | -0.069 | 0.057 | 2.318E-01 | 0.905 | cis | SARS-CoV-2 infection |
| 17513_11  | ANXA11                 | Annexin A11                                                                                                                        | P50995 | ANXA11    | chr10:80205572  | Inverse variance weighted | 3  | 0.054  | 0.045 | 2.319E-01 | 0.905 | cis | SARS-CoV-2 infection |
| 3028_36   | Ck-b-8-1               | Ck-b-8-1                                                                                                                           | P55773 | CL23      | chr17:36017972  | Inverse variance weighted | 4  | -0.055 | 0.046 | 2.321E-01 | 0.905 | cis | SARS-CoV-2 infection |
| 14123_34  | GI24:ECD               | V-type immunoglobulin domain-containing suppressor of T-cell activation:Extracellular domain                                       | Q9H7M9 | VSIR      | chr10:71773520  | Inverse variance weighted | 5  | 0.046  | 0.039 | 2.329E-01 | 0.905 | cis | SARS-CoV-2 infection |
| 19176_27  | FA49B                  | Protein FAM49B                                                                                                                     | Q9NUQ9 | CYR1B     | chr8:130017504  | Wald ratio                | 1  | 0.117  | 0.098 | 2.329E-01 | 0.905 | cis | SARS-CoV-2 infection |
| 8687_26   | T106B                  | Transmembrane protein 106B                                                                                                         | Q9NUM4 | TMEM106B  | chr7:12211270   | Inverse variance weighted | 2  | 0.042  | 0.035 | 2.331E-01 | 0.905 | cis | SARS-CoV-2 infection |
| 11177_16  | K2C5                   | Keratin, type II cytoskeletal 5                                                                                                    | P13647 | KRT5      | chr12:52520530  | Inverse variance weighted | 2  | 0.064  | 0.054 | 2.333E-01 | 0.905 | cis | SARS-CoV-2 infection |
| 3216_2    | PIGR                   | Polymeric immunoglobulin receptor                                                                                                  | P01833 | PIGR      | chr1:206946466  | Wald ratio                | 1  | 0.085  | 0.071 | 2.351E-01 | 0.905 | cis | SARS-CoV-2 infection |
| 13132_14  | SEMSA                  | Semaphorin-5A                                                                                                                      | Q13591 | SEMSA5A   | chr5:9546075    | Inverse variance weighted | 10 | -0.006 | 0.005 | 2.354E-01 | 0.905 | cis | SARS-CoV-2 infection |
| 8932_1    | ENTP6                  | Ectonucleoside triphosphate diphosphohydrolase 6                                                                                   | Q75354 | ENTPD6    | chr20:25195693  | Wald ratio                | 1  | 0.060  | 0.050 | 2.355E-01 | 0.905 | cis | SARS-CoV-2 infection |
| 7916_10   | S100A7                 | Protein S100-A7                                                                                                                    | P31151 | S100A7    | chr1:153460651  | Inverse variance weighted | 7  | 0.009  | 0.008 | 2.356E-01 | 0.905 | cis | SARS-CoV-2 infection |
| 16785_45  | HD-5                   | Defensin-5                                                                                                                         | Q01523 | DEFAS5    | chr8:7056739    | Wald ratio                | 1  | -0.089 | 0.075 | 2.360E-01 | 0.905 | cis | SARS-CoV-2 infection |
| 13090_17  | S100A6                 | Protein S100-A6                                                                                                                    | P06703 | S100A6    | chr1:153536244  | Inverse variance weighted | 2  | 0.102  | 0.086 | 2.365E-01 | 0.905 | cis | SARS-CoV-2 infection |
| 11134_30  | RF1ML                  | Peptide chain release factor 1-like, mitochondrial                                                                                 | Q9UCG7 | MTRF1L    | chr16:153002709 | Wald ratio                | 1  | -0.036 | 0.030 | 2.368E-01 | 0.905 | cis | SARS-CoV-2 infection |
| 15565_102 | CA125                  | Mucin-16                                                                                                                           | Q6WXI7 | MUC16     | chr19:8981342   | Inverse variance weighted | 2  | -0.081 | 0.068 | 2.368E-01 | 0.905 | cis | SARS-CoV-2 infection |
| 9357_4    | CREG1                  | Protein CREG1                                                                                                                      | Q75629 | CREG1     | chr1:167553805  | Inverse variance weighted | 2  | 0.031  | 0.026 | 2.374E-01 | 0.905 | cis | SARS-CoV-2 infection |
| 9183_7    | IFN-a/b R1             | Interferon alpha/beta receptor 1                                                                                                   | P17181 | IFNAR1    | chr21:33324387  | Inverse variance weighted | 7  | 0.010  | 0.008 | 2.374E-01 | 0.905 | cis | SARS-CoV-2 infection |
| 4564_2    | PLXC1                  | Plexin-C1                                                                                                                          | O60486 | PLXNC1    | chr12:94148577  | Inverse variance weighted | 11 | 0.008  | 0.007 | 2.376E-01 | 0.905 | cis | SARS-CoV-2 infection |
| 5227_60   | PKD1                   | [Pyruvate dehydrogenase (acetyl-transferring)] kinase isozyme 1, mitochondrial                                                     | Q15118 | PKD1      | chr2:172555373  | Inverse variance weighted | 3  | 0.030  | 0.026 | 2.376E-01 | 0.905 | cis | SARS-CoV-2 infection |
| 13988_67  | NMRL1                  | Nmra-like family domain-containing protein 1                                                                                       | Q9HRL8 | NMRL1     | chr16:4495763   | Inverse variance weighted | 11 | 0.014  | 0.012 | 2.386E-01 | 0.905 | cis | SARS-CoV-2 infection |
| 9316_67   | WFDC1                  | WAP four-disulfide core domain protein 1                                                                                           | Q9HC57 | WFDC1     | chr16:84294846  | Inverse variance weighted | 5  | 0.021  | 0.018 | 2.403E-01 | 0.905 | cis | SARS-CoV-2 infection |
| 4549_78   | FUT5                   | Alpha-(1,3)-fucosyltransferase 5                                                                                                   | Q11128 | FUT5      | chr19:5870540   | Inverse variance weighted | 7  | -0.010 | 0.009 | 2.404E-01 | 0.905 | cis | SARS-CoV-2 infection |
| 6649_51   | NET1                   | Netrin-1                                                                                                                           | O95631 | NTN1      | chr17:9021510   | Inverse variance weighted | 6  | 0.014  | 0.012 | 2.408E-01 | 0.905 | cis | SARS-CoV-2 infection |
| 3448_13   | IR                     | Insulin receptor                                                                                                                   | P06213 | INSR      | chr19:7294414   | Wald ratio                | 1  | -0.079 | 0.067 | 2.411E-01 | 0.905 | cis | SARS-CoV-2 infection |
| 13133_73  | LTBP4                  | Latent-transforming growth factor beta-binding protein 4                                                                           | Q8N251 | LTBP4     | chr19:40592883  | Inverse variance weighted | 2  | -0.084 | 0.071 | 2.411E-01 | 0.905 | cis | SARS-CoV-2 infection |
| 6899_37   | PHS2                   | Pterin-4-alpha-carbinolamine dehydratase 2                                                                                         | Q9H0N5 | PCBD2     | chr5:134905120  | Wald ratio                | 1  | 0.129  | 0.110 | 2.415E-01 | 0.905 | cis | SARS-CoV-2 infection |
| 12801_33  | IRF2                   | Interferon regulatory factor 2                                                                                                     | P14316 | IRF2      | chr4:184474558  | Wald ratio                | 1  | -0.116 | 0.099 | 2.430E-01 | 0.905 | cis | SARS-CoV-2 infection |
| 4131_72   | Fibronectin            | Fibronectin                                                                                                                        | P02751 | FN1       | chr2:215436073  | Inverse variance weighted | 2  | -0.083 | 0.071 | 2.433E-01 | 0.905 | cis | SARS-CoV-2 infection |
| 17350_13  | CHM2B                  | Charged multivesicular body protein 2b                                                                                             | Q9UQN3 | CHMP2B    | chr3:87227271   | Inverse variance weighted | 3  | -0.024 | 0.021 | 2.439E-01 | 0.905 | cis | SARS-CoV-2 infection |
| 7049_2    | ADAM 23                | Disintegrin and metalloproteinase domain-containing protein 23                                                                     | O75077 | ADAM23    | chr2:206443532  | Inverse variance weighted | 7  | 0.014  | 0.012 | 2.441E-01 | 0.905 | cis | SARS-CoV-2 infection |

|           |                                  |                                                                                                      |        |           |                 |                           |                           |        |       |           |           |       |                      |                      |
|-----------|----------------------------------|------------------------------------------------------------------------------------------------------|--------|-----------|-----------------|---------------------------|---------------------------|--------|-------|-----------|-----------|-------|----------------------|----------------------|
| 5400_52   | Leptin R                         | Leptin receptor, soluble                                                                             | P48357 | LEPR      | chr1:65420652   | Inverse variance weighted | 10                        | 0.011  | 0.009 | 2.450E-01 | 0.905     | cis   | SARS-CoV-2 infection |                      |
| 4155_3    | Tenascin                         | Tenascin                                                                                             | P24821 | TNC       | chr9:115118207  | Inverse variance weighted | 12                        | -0.011 | 0.009 | 2.453E-01 | 0.905     | cis   | SARS-CoV-2 infection |                      |
| 10512_13  | IL3RB:ECD                        | Cytokine receptor common subunit beta:Extracellular domain                                           | P32927 | CSF2RB    | chr22:36913628  | Inverse variance weighted | 7                         | -0.014 | 0.012 | 2.455E-01 | 0.905     | cis   | SARS-CoV-2 infection |                      |
| 10372_18  | STAT6                            | Signal transducer and activator of transcription 6                                                   | P42226 | STAT6     | chr12:57132139  | Inverse variance weighted | 2                         | 0.041  | 0.035 | 2.456E-01 | 0.905     | cis   | SARS-CoV-2 infection |                      |
| 13998_26  | PURA1                            | Adenylosuccinate synthetase isozyme 1                                                                | Q8N142 | ADSS1     | chr14:104724229 | Inverse variance weighted | 3                         | 0.029  | 0.025 | 2.457E-01 | 0.905     | cis   | SARS-CoV-2 infection |                      |
| 2737_22   | NovH                             | Protein NOV homolog                                                                                  | P48745 | CNC3      | chr8:119416446  | Wald ratio                | 1                         | -0.083 | 0.071 | 2.465E-01 | 0.905     | cis   | SARS-CoV-2 infection |                      |
| 12697_30  | PI42A                            | Phosphatidylinositol 5-phosphate 4-kinase type-2 alpha                                               | P48426 | PIP4K2A   | chr10:22714578  | Wald ratio                | 1                         | 0.049  | 0.042 | 2.468E-01 | 0.905     | cis   | SARS-CoV-2 infection |                      |
| 12401_3   | STALP                            | AMSH-like protease                                                                                   | Q96FJ0 | STAMBP1L  | chr10:88879734  | Wald ratio                | 1                         | 0.059  | 0.051 | 2.472E-01 | 0.905     | cis   | SARS-CoV-2 infection |                      |
| 16770_3   | REG1B                            | Lithostathine-1-beta                                                                                 | P48304 | REG1B     | chr2:79088019   | Inverse variance weighted | 3                         | 0.116  | 0.100 | 2.473E-01 | 0.905     | cis   | SARS-CoV-2 infection |                      |
| 5604_30   | HPSE                             | Heparanase                                                                                           | Q9Y251 | HPSE      | chr4:83335153   | Inverse variance weighted | 2                         | -0.037 | 0.032 | 2.477E-01 | 0.905     | cis   | SARS-CoV-2 infection |                      |
| 2742_68   | Siglec-7                         | Sialic acid-binding Ig-like lectin 7                                                                 | Q9Y286 | SIGLEC7   | chr19:51142299  | Wald ratio                | 1                         | 0.052  | 0.045 | 2.485E-01 | 0.905     | cis   | SARS-CoV-2 infection |                      |
| 15395_15  | GST M1-1                         | Glutathione S-transferase Mu 1                                                                       | P09488 | GSTM1     | chr1:109687814  | Inverse variance weighted | 6                         | 0.036  | 0.031 | 2.491E-01 | 0.905     | cis   | SARS-CoV-2 infection |                      |
| 14107_1   | MTHF5                            | 5-formyltetrahydrofolate cyclo-ligase                                                                | P49914 | MTHF5     | chr15:79897379  | Inverse variance weighted | 6                         | 0.016  | 0.014 | 2.495E-01 | 0.905     | cis   | SARS-CoV-2 infection |                      |
| 2677_1    | ERBB1                            | Epidermal growth factor receptor                                                                     | P00533 | EGFR      | chr7:55019017   | Inverse variance weighted | 3                         | 0.039  | 0.034 | 2.526E-01 | 0.911     | cis   | SARS-CoV-2 infection |                      |
| 18922_27  | CD68                             | Macrosialin                                                                                          | P34810 | CD68      | chr17:7579491   | Inverse variance weighted | 2                         | -0.100 | 0.087 | 2.530E-01 | 0.911     | cis   | SARS-CoV-2 infection |                      |
| 6151_18   | MP2K3                            | Dual specificity mitogen-activated protein kinase kinase 3                                           | P46734 | MAP2K3    | chr17:21284672  | Wald ratio                | 1                         | 0.119  | 0.104 | 2.536E-01 | 0.911     | cis   | SARS-CoV-2 infection |                      |
| 6620_82   | LIGO1                            | Leucine-rich repeat and immunoglobulin-like domain-containing nogo receptor-interacting protein 1    | Q96FE5 | LINGO1    | chr15:77820900  | Inverse variance weighted | 2                         | 0.057  | 0.050 | 2.548E-01 | 0.911     | cis   | SARS-CoV-2 infection |                      |
| 10815_2   | HABP4                            | Intracellular hyaluronan-binding protein 4                                                           | Q5JV50 | HABP4     | chr9:96450169   | Inverse variance weighted | 3                         | -0.020 | 0.018 | 2.552E-01 | 0.911     | cis   | SARS-CoV-2 infection |                      |
| 15544_25  | kallikrein 14                    | Kallikrein-14                                                                                        | Q9P0G3 | KLK14     | chr19:51084245  | Inverse variance weighted | 2                         | -0.078 | 0.069 | 2.556E-01 | 0.911     | cis   | SARS-CoV-2 infection |                      |
| 18387_7   | suppression of tumorigenicity 13 | Hsc70-interacting protein                                                                            | P50502 | ST13      | chr22:40856639  | Wald ratio                | 1                         | -0.102 | 0.089 | 2.559E-01 | 0.911     | cis   | SARS-CoV-2 infection |                      |
| 19223_6   | RAB1A                            | Ras-related protein Rab-1A                                                                           | P62820 | RAB1A     | chr2:65130331   | Wald ratio                | 1                         | -0.098 | 0.086 | 2.563E-01 | 0.911     | cis   | SARS-CoV-2 infection |                      |
| 5238_26   | PIPE                             | Peptidyl-prolyl cis-trans isomerase E                                                                | Q9UNP9 | PIPE      | chr1:39692182   | Inverse variance weighted | 2                         | 0.019  | 0.017 | 2.565E-01 | 0.911     | cis   | SARS-CoV-2 infection |                      |
| 18819_21  | PPIC                             | Peptidyl-prolyl cis-trans isomerase C                                                                | P45877 | PPIC      | chr5:123036725  | Inverse variance weighted | 3                         | 0.015  | 0.013 | 2.571E-01 | 0.911     | cis   | SARS-CoV-2 infection |                      |
| 12459_13  | PKHA1                            | Pleckstrin homology domain-containing family A member 1                                              | Q9HB21 | PLEKHA1   | chr10:122374696 | Inverse variance weighted | 4                         | 0.017  | 0.015 | 2.580E-01 | 0.911     | cis   | SARS-CoV-2 infection |                      |
| 13544_9   | HMH41                            | Rho GTPase-activating protein 45                                                                     | Q92619 | ARHGAP45  | chr19:1065923   | Wald ratio                | 1                         | 0.042  | 0.038 | 2.583E-01 | 0.911     | cis   | SARS-CoV-2 infection |                      |
| 4496_60   | MMP-12                           | Macrophage metalloelastase                                                                           | P39900 | MMP12     | chr11:102874982 | Inverse variance weighted | 7                         | 0.015  | 0.013 | 2.583E-01 | 0.911     | cis   | SARS-CoV-2 infection |                      |
| 18214_2   | GSHO                             | Glutamate-cysteine ligase regulatory subunit                                                         | P48507 | GCLM      | chr1:93909456   | Inverse variance weighted | 2                         | 0.050  | 0.045 | 2.596E-01 | 0.913     | cis   | SARS-CoV-2 infection |                      |
| 4763_31   | Afamin                           | Afamin                                                                                               | P43652 | AFM       | chr4:73481745   | Inverse variance weighted | 3                         | 0.042  | 0.037 | 2.615E-01 | 0.913     | cis   | SARS-CoV-2 infection |                      |
| 17712_7   | ID1I                             | Isopentenyl-diphosphate Delta-isomerase 1                                                            | Q13907 | ID1I      | chr10:1049119   | Wald ratio                | 1                         | -0.083 | 0.074 | 2.618E-01 | 0.913     | cis   | SARS-CoV-2 infection |                      |
| 12686_15  | THTM                             | 3-mercaptopyruvate sulfurtransferase                                                                 | P25325 | MPST      | chr22:37019635  | Inverse variance weighted | 2                         | -0.057 | 0.051 | 2.620E-01 | 0.913     | cis   | SARS-CoV-2 infection |                      |
| 5076_53   | EPHAA                            | Ephrin type-A receptor 10                                                                            | Q5J2Y3 | EPHAA10   | chr1:37765133   | Wald ratio                | 1                         | 0.074  | 0.066 | 2.623E-01 | 0.913     | cis   | SARS-CoV-2 infection |                      |
| 11273_176 | GSTT2                            | Glutathione S-transferase theta-2B                                                                   | POCG30 | GSTT2B    | chr22:23961195  | Inverse variance weighted | 4                         | 0.033  | 0.029 | 2.633E-01 | 0.913     | cis   | SARS-CoV-2 infection |                      |
| 13536_56  | POLI                             | DNA polymerase iota                                                                                  | Q9UNA4 | POLI      | chr18:54269517  | Wald ratio                | 1                         | -0.060 | 0.054 | 2.646E-01 | 0.913     | cis   | SARS-CoV-2 infection |                      |
| 12594_5   | GRAN                             | Grancalcin                                                                                           | P28676 | GCA       | chr2:162318840  | Inverse variance weighted | 2                         | 0.018  | 0.016 | 2.651E-01 | 0.913     | cis   | SARS-CoV-2 infection |                      |
| 17490_4   | SH3BGR13-like protein            | SH3 domain-binding glutamic acid-rich-like protein 3                                                 | Q9H299 | SH3BGR13  | chr1:26280086   | Inverse variance weighted | 3                         | 0.020  | 0.018 | 2.655E-01 | 0.913     | cis   | SARS-CoV-2 infection |                      |
| 4541_49   | CDON                             | Cell adhesion molecule-related/down-regulated by oncogenes                                           | Q4KMG0 | CDON      | chr11:126063335 | Inverse variance weighted | 4                         | 0.014  | 0.013 | 2.657E-01 | 0.913     | cis   | SARS-CoV-2 infection |                      |
| 16919_1   | ACBP                             | Acyl-CoA-binding protein                                                                             | P07108 | DBI       | chr2:119366924  | Inverse variance weighted | 2                         | 0.023  | 0.021 | 2.663E-01 | 0.913     | cis   | SARS-CoV-2 infection |                      |
| 15603_20  | Integrin alpha-2                 | Integrin alpha-2                                                                                     | P17301 | ITGA2     | chr5:52989340   | Wald ratio                | 1                         | 0.058  | 0.052 | 2.667E-01 | 0.913     | cis   | SARS-CoV-2 infection |                      |
| 6471_53   | FHR4                             | Complement factor H-related protein 4                                                                | Q92496 | CFHR4     | chr1:196888014  | Inverse variance weighted | 10                        | 0.015  | 0.013 | 2.668E-01 | 0.913     | cis   | SARS-CoV-2 infection |                      |
| 7015_8    | LIRB5                            | Leukocyte immunoglobulin-like receptor subfamily B member 5                                          | Q75023 | LIRB5     | chr19:54257301  | Inverse variance weighted | 6                         | 0.007  | 0.006 | 2.680E-01 | 0.913     | cis   | SARS-CoV-2 infection |                      |
| 3206_4    | LYVE1                            | Lymphatic vessel endothelial hyaluronic acid receptor 1                                              | Q9Y5V7 | LYVE1     | chr11:10611689  | Inverse variance weighted | 6                         | -0.025 | 0.023 | 2.680E-01 | 0.913     | cis   | SARS-CoV-2 infection |                      |
| 8231_122  | VEGF SR1                         | Vascular endothelial growth factor receptor 1                                                        | P17948 | FLT1      | chr13:28495145  | Wald ratio                | 1                         | 0.103  | 0.093 | 2.684E-01 | 0.913     | cis   | SARS-CoV-2 infection |                      |
| 8304_50   | OPG                              | Tumor necrosis factor receptor superfamily member 11B                                                | O00300 | TNFRSF11B | chr8:118951885  | Inverse variance weighted | 4                         | 0.044  | 0.040 | 2.684E-01 | 0.913     | cis   | SARS-CoV-2 infection |                      |
| 3831_21   | pTEN                             | Phosphatidylinositol 3,4,5-trisphosphate 3-phosphatase and dual-specificity protein phosphatase PTEN | P60484 | PTEN      | chr10:87862563  | Wald ratio                | 1                         | -0.131 | 0.118 | 2.686E-01 | 0.913     | cis   | SARS-CoV-2 infection |                      |
| 4153_11   | alpha-1-antichymotrypsin complex | Alpha-1-antichymotrypsin complex                                                                     | P07288 | KLK3      | SRPIN3A3        | chr14:94612384            | Inverse variance weighted | 3      | 0.054 | 0.049     | 2.698E-01 | 0.915 | cis                  | SARS-CoV-2 infection |
| 19115_13  | CMBL                             | Carboxymethylenebutenolidase homolog                                                                 | Q96DG6 | CMBL      | chr5:10307902   | Wald ratio                | 1                         | 0.035  | 0.032 | 2.727E-01 | 0.917     | cis   | SARS-CoV-2 infection |                      |
| 19367_34  | D3D2                             | Enoyl-CoA delta isomerase 1, mitochondrial                                                           | P42126 | EC1I      | chr16:2252300   | Inverse variance weighted | 2                         | 0.045  | 0.041 | 2.730E-01 | 0.917     | cis   | SARS-CoV-2 infection |                      |
| 14047_78  | BDNF                             | Brain-derived neurotrophic factor                                                                    | P23560 | BDNF      | chr11:27722058  | Inverse variance weighted | 2                         | -0.089 | 0.081 | 2.730E-01 | 0.917     | cis   | SARS-CoV-2 infection |                      |
| 9578_263  | MAN54                            | MAN5C domain-containing protein 4                                                                    | AGNH57 | MAN5C4    | chr12:27780236  | Inverse variance weighted | 7                         | -0.012 | 0.011 | 2.750E-01 | 0.917     | cis   | SARS-CoV-2 infection |                      |
| 2834_54   | kallikrein 8                     | Kallikrein-8                                                                                         | O60259 | KLK8      | chr19:51002711  | Wald ratio                | 1                         | 0.035  | 0.032 | 2.758E-01 | 0.917     | cis   | SARS-CoV-2 infection |                      |
| 13460_4   | CHAD                             | Chondroadherin                                                                                       | O15335 | CHAD      | chr17:50468906  | Wald ratio                | 1                         | 0.105  | 0.096 | 2.759E-01 | 0.917     | cis   | SARS-CoV-2 infection |                      |
| 10818_36  | ASM                              | Sphingomyelin phosphodiesterase                                                                      | P17405 | SMPD1     | chr11:6390440   | Inverse variance weighted | 5                         | 0.014  | 0.013 | 2.760E-01 | 0.917     | cis   | SARS-CoV-2 infection |                      |
| 3038_9    | I-TAC                            | C-X-C motif chemokine 11                                                                             | O14625 | CXCL11    | chr4:76041415   | Inverse variance weighted | 4                         | -0.058 | 0.053 | 2.762E-01 | 0.917     | cis   | SARS-CoV-2 infection |                      |
| 6234_74   | VITRN                            | Vitrin                                                                                               | Q6UXI7 | VIT       | chr2:36696690   | Inverse variance weighted | 6                         | -0.016 | 0.015 | 2.763E-01 | 0.917     | cis   | SARS-CoV-2 infection |                      |
| 18312_68  | NDRG3                            | Protein NDRG3                                                                                        | Q9UGV2 | NDRG3     | chr20:36746090  | Inverse variance weighted | 3                         | -0.069 | 0.063 | 2.766E-01 | 0.917     | cis   | SARS-CoV-2 infection |                      |
| 5609_92   | F19A5                            | Protein FAM19A5                                                                                      | Q7Z5A7 | TAFAS     | chr22:48489553  | Wald ratio                | 1                         | 0.110  | 0.101 | 2.767E-01 | 0.917     | cis   | SARS-CoV-2 infection |                      |
| 15447_45  | Sorbitol dehydrogenase           | Sorbitol dehydrogenase                                                                               | Q00796 | SORD      | chr15:45023147  | Inverse variance weighted | 5                         | 0.023  | 0.021 | 2.768E-01 | 0.917     | cis   | SARS-CoV-2 infection |                      |
| 19615_213 | 5NT3                             | Cytosolic 5'-nucleotidase 3A                                                                         | Q9H0P0 | NT5C3A    | chr7:33062796   | Wald ratio                | 1                         | 0.066  | 0.061 | 2.776E-01 | 0.918     | cis   | SARS-CoV-2 infection |                      |
| 17403_14  | acyl-Coenzyme A dehydrogenase    | Short/branched chain specific acyl-CoA dehydrogenase, mitochondrial                                  | P45954 | ACAD5S    | chr10:123008979 | Inverse variance weighted | 2                         | 0.042  | 0.039 | 2.784E-01 | 0.919     | cis   | SARS-CoV-2 infection |                      |
| 13944_3   | SULT 1A3                         | Sulfotransferase 1A3                                                                                 | P0DMM9 | SULT1A3   | chr16:30199228  | Inverse variance weighted | 4                         | 0.078  | 0.073 | 2.813E-01 | 0.926     | cis   | SARS-CoV-2 infection |                      |
| 3196_6    | HPLN1                            | Hyaluronan and proteoglycan link protein 1                                                           | P10915 | HAPLN1    | chr5:83720855   | Inverse variance weighted | 3                         | 0.056  | 0.052 | 2.817E-01 | 0.926     | cis   | SARS-CoV-2 infection |                      |
| 14094_29  | HB-EGF                           | Heparin-binding EGF-like growth factor                                                               | Q99075 | HBEGF     | chr5:140346603  | Wald ratio                | 1                         | -0.103 | 0.096 | 2.835E-01 | 0.928     | cis   | SARS-CoV-2 infection |                      |
| 10440_26  | ACAM:ECD                         | CXADR-like membrane protein:Extracellular domain                                                     | Q9H6B4 | CLMP      | chr11:123195248 | Inverse variance weighted | 3                         | 0.035  | 0.032 | 2.836E-01 | 0.928     | cis   | SARS-CoV-2 infection |                      |
| 4209_60   | DRG-1                            | Vacuolar protein sorting-associated protein VTA1 homolog                                             | Q9NP79 | VTA1      | chr6:142147162  | Wald ratio                | 1                         | -0.098 | 0.092 | 2.848E-01 | 0.930     | cis   | SARS-CoV-2 infection |                      |
| 8916_32   | STIM1:CD                         | Stromal interaction molecule 1:Cytoplasmic domain                                                    | Q13586 | STIM1     | chr11:3854527   | Wald ratio                | 1                         | -0.055 | 0.052 | 2.853E-01 | 0.930     | cis   | SARS-CoV-2 infection |                      |
| 3710_49   | Angiostatin                      | Angiostatin                                                                                          | P00747 | PLG       | chr6:160702194  | Inverse variance weighted | 7                         | 0.027  | 0.025 | 2.857E-01 | 0.930     | cis   | SARS-CoV-2 infection |                      |
| 12560_9   | NTSC                             | 5'([3]-deoxyribonucleotidase, cytosolic type                                                         | Q8TCD5 | NT5C      | chr17:75131757  | Inverse variance weighted | 5                         | -0.013 | 0.012 | 2.878E-01 | 0.931     | cis   | SARS-CoV-2 infection |                      |
| 15367_38  | LPLC1                            | BPI fold-containing family B member 1                                                                | Q8TDL5 | BPIFB1    | chr20:33273480  | Inverse variance weighted | 7                         | -0.013 | 0.013 | 2.879E-01 | 0.931     | cis   | SARS-CoV-2 infection |                      |
| 14101_2   | CNTRF alpha                      | Ciliary neurotrophic factor receptor subunit alpha                                                   | P26992 | CNTRF     | chr9:34590140   | Inverse variance weighted | 3                         | -0.035 | 0.033 | 2.882E-01 | 0.931     | cis   | SARS-CoV-2 infection |                      |

|           |                                            |                                                                                    |        |           |                 |                           |    |        |       |           |       |     |                      |
|-----------|--------------------------------------------|------------------------------------------------------------------------------------|--------|-----------|-----------------|---------------------------|----|--------|-------|-----------|-------|-----|----------------------|
| 17691_1   | TPP1                                       | Tripeptidyl-peptidase 1                                                            | O14773 | TPP1      | chr11:6619448   | Inverse variance weighted | 5  | -0.026 | 0.025 | 2.939E-01 | 0.931 | cis | SARS-CoV-2 infection |
| 12399_194 | CCD50                                      | Coiled-coil domain-containing protein 50                                           | Q8IVM0 | CCDC50    | chr3:191329085  | Wald ratio                | 1  | -0.100 | 0.096 | 2.943E-01 | 0.931 | cis | SARS-CoV-2 infection |
| 15494_11  | FGFP1                                      | Fibroblast growth factor-binding protein 1                                         | Q14512 | FGFBP1    | chr4:15938740   | Wald ratio                | 1  | -0.070 | 0.067 | 2.945E-01 | 0.931 | cis | SARS-CoV-2 infection |
| 4979_34   | DERM                                       | Dermatopontin                                                                      | Q07507 | DPT       | chr1:168729206  | Inverse variance weighted | 6  | -0.013 | 0.013 | 2.950E-01 | 0.931 | cis | SARS-CoV-2 infection |
| 7997_118  | DOC2B                                      | Double C2-like domain-containing protein beta                                      | Q14184 | DOC2B     | chr17:181650    | Wald ratio                | 1  | -0.116 | 0.111 | 2.957E-01 | 0.931 | cis | SARS-CoV-2 infection |
| 15533_97  | Macrophage scavenger receptor:ECD          | Macrophage scavenger receptor types I and II: Extracellular domain                 | P21757 | MSR1      | chr8:16567490   | Inverse variance weighted | 5  | 0.012  | 0.012 | 2.975E-01 | 0.935 | cis | SARS-CoV-2 infection |
| 19124_9   | UBCP1                                      | Ubiquitin-like domain-containing CTD phosphatase 1                                 | Q8WVY7 | UBLCP1    | chr5:159263290  | Inverse variance weighted | 2  | -0.045 | 0.043 | 2.982E-01 | 0.935 | cis | SARS-CoV-2 infection |
| 9459_7    | Fas, soluble                               | Tumor necrosis factor receptor superfamily member 6                                | P25445 | FAS       | chr10:88953813  | Inverse variance weighted | 2  | -0.085 | 0.082 | 2.985E-01 | 0.935 | cis | SARS-CoV-2 infection |
| 17783_9   | MMAB                                       | Cob(II)yrinic acid a,c-diamide adenosyltransferase, mitochondrial                  | Q96EY8 | MMAB      | chr12:109573580 | Inverse variance weighted | 6  | 0.014  | 0.013 | 2.993E-01 | 0.935 | cis | SARS-CoV-2 infection |
| 17332_3   | ARHL2                                      | Poly(ADP-ribose) glycohydrolase ARH3                                               | Q9NX46 | ADPRS     | chr1:36088892   | Inverse variance weighted | 3  | -0.037 | 0.036 | 2.996E-01 | 0.935 | cis | SARS-CoV-2 infection |
| 8288_27   | b2-Glycoprotein I                          | Beta-2-glycoprotein 1                                                              | P02749 | APOH      | chr17:66256525  | Inverse variance weighted | 3  | 0.011  | 0.011 | 3.002E-01 | 0.935 | cis | SARS-CoV-2 infection |
| 18875_125 | Chondrocalcin                              | Chondrocalcin                                                                      | P02458 | COL2A1    | chr12:48004554  | Inverse variance weighted | 8  | -0.015 | 0.014 | 3.006E-01 | 0.935 | cis | SARS-CoV-2 infection |
| 18321_38  | MTDC                                       | Bifunctional methylenetetrahydrofolate dehydrogenase/cyclohydrolase, mitochondrial | P13995 | MTFHD2    | chr2:74186172   | Inverse variance weighted | 2  | 0.038  | 0.037 | 3.036E-01 | 0.937 | cis | SARS-CoV-2 infection |
| 18289_16  | MIP-5                                      | C-C motif chemokine 15                                                             | Q16663 | CCL15     | chr17:36001553  | Inverse variance weighted | 5  | 0.027  | 0.027 | 3.039E-01 | 0.937 | cis | SARS-CoV-2 infection |
| 16558_2   | MYOC                                       | Myocilin                                                                           | Q99972 | MYOC      | chr1:171652688  | Inverse variance weighted | 8  | 0.019  | 0.019 | 3.040E-01 | 0.937 | cis | SARS-CoV-2 infection |
| 4355_13   | DAPK2                                      | Death-associated protein kinase 2                                                  | Q9UIK4 | DAPK2     | chr15:64072033  | Inverse variance weighted | 3  | 0.017  | 0.017 | 3.049E-01 | 0.937 | cis | SARS-CoV-2 infection |
| 8248_222  | SIG14                                      | Sialic acid-binding Ig-like lectin 14                                              | Q08E72 | SIGLEC14  | chr19:51646825  | Inverse variance weighted | 3  | 0.052  | 0.051 | 3.049E-01 | 0.937 | cis | SARS-CoV-2 infection |
| 4220_39   | FER                                        | Tyrosine-protein kinase Fer                                                        | P16591 | FER       | chr5:108747841  | Wald ratio                | 1  | 0.066  | 0.064 | 3.051E-01 | 0.937 | cis | SARS-CoV-2 infection |
| 9077_10   | MA1A2                                      | Mannosyl-oligosaccharide 1,2-alpha-mannosidase IB                                  | O60476 | MAN1A2    | chr1:117367449  | Inverse variance weighted | 4  | -0.032 | 0.031 | 3.052E-01 | 0.937 | cis | SARS-CoV-2 infection |
| 14156_33  | 14-3-3 protein beta/alpha                  | 14-3-3 protein beta/alpha                                                          | P31946 | YWHA8     | chr20:44885702  | Wald ratio                | 1  | 0.085  | 0.083 | 3.058E-01 | 0.937 | cis | SARS-CoV-2 infection |
| 18310_26  | SELW                                       | Selenoprotein W                                                                    | P63302 | SELENOW   | chr19:47778677  | Inverse variance weighted | 3  | -0.030 | 0.029 | 3.067E-01 | 0.937 | cis | SARS-CoV-2 infection |
| 3310_62   | FCG2B                                      | Low affinity immunoglobulin gamma Fc region receptor II-b                          | P31994 | FCGR2B    | chr1:161663143  | Inverse variance weighted | 12 | -0.019 | 0.019 | 3.082E-01 | 0.937 | cis | SARS-CoV-2 infection |
| 14066_49  | MAGI2                                      | Membrane-associated guanylate kinase, WW and PDZ domain-containing protein 2       | Q86UJ8 | MAGI2     | chr7:79453667   | Inverse variance weighted | 6  | -0.011 | 0.011 | 3.084E-01 | 0.937 | cis | SARS-CoV-2 infection |
| 5698_60   | Tenascin-X                                 | Tenascin-X                                                                         | P22105 | TNXB      | chr6:32115334   | Inverse variance weighted | 5  | -0.012 | 0.012 | 3.087E-01 | 0.937 | cis | SARS-CoV-2 infection |
| 12329_21  | KS6A1                                      | Ribosomal protein S6 kinase alpha-1                                                | Q15418 | RP56KA1   | chr1:26529761   | Wald ratio                | 1  | -0.050 | 0.049 | 3.087E-01 | 0.937 | cis | SARS-CoV-2 infection |
| 19622_7   | Activin A                                  | Activin A                                                                          | P08476 | INHBA     | chr7:41705834   | Wald ratio                | 1  | -0.088 | 0.087 | 3.094E-01 | 0.938 | cis | SARS-CoV-2 infection |
| 8337_65   | PTPRU                                      | Receptor-type tyrosine-protein phosphatase U                                       | Q92729 | PTPRU     | chr1:29236516   | Inverse variance weighted | 5  | -0.033 | 0.033 | 3.133E-01 | 0.942 | cis | SARS-CoV-2 infection |
| 19560_23  | PLXAA                                      | Plexin-A4                                                                          | Q9HCM2 | PLXNA4    | chr7:132648688  | Wald ratio                | 1  | -0.058 | 0.058 | 3.134E-01 | 0.942 | cis | SARS-CoV-2 infection |
| 5620_13   | AMD                                        | Peptidyl-glycine alpha-amidating monooxygenase                                     | P19021 | PAM       | chr5:102753981  | Inverse variance weighted | 10 | 0.011  | 0.011 | 3.135E-01 | 0.942 | cis | SARS-CoV-2 infection |
| 17456_53  | GOLM1                                      | Golgi membrane protein 1                                                           | Q8NB14 | GOLM1     | chr9:86100173   | Inverse variance weighted | 6  | -0.030 | 0.029 | 3.137E-01 | 0.942 | cis | SARS-CoV-2 infection |
| 15604_18  | JNK2                                       | Mitogen-activated protein kinase 9                                                 | P45984 | MAPK9     | chr5:180292099  | Inverse variance weighted | 2  | -0.052 | 0.051 | 3.145E-01 | 0.942 | cis | SARS-CoV-2 infection |
| 17821_20  | NMT2                                       | Glycylpeptide N-tetradecanoyltransferase 2                                         | O60551 | NMT2      | chr10:15168693  | Wald ratio                | 1  | 0.076  | 0.076 | 3.145E-01 | 0.942 | cis | SARS-CoV-2 infection |
| 5069_9    | DAF                                        | Complement decay-accelerating factor                                               | P08174 | CD55      | chr1:207321519  | Inverse variance weighted | 4  | 0.023  | 0.023 | 3.158E-01 | 0.942 | cis | SARS-CoV-2 infection |
| 19130_81  | SPB8                                       | Serpin B8                                                                          | P50452 | SERPINB8  | chr18:63970029  | Inverse variance weighted | 3  | -0.021 | 0.021 | 3.158E-01 | 0.942 | cis | SARS-CoV-2 infection |
| 3403_1    | TPS82                                      | Tryptase beta-2                                                                    | P20231 | TPS82     | chr16:1230184   | Inverse variance weighted | 8  | 0.010  | 0.010 | 3.160E-01 | 0.942 | cis | SARS-CoV-2 infection |
| 4337_49   | CRP                                        | C-reactive protein                                                                 | P02741 | CRP       | chr1:159714589  | Inverse variance weighted | 2  | 0.028  | 0.028 | 3.168E-01 | 0.943 | cis | SARS-CoV-2 infection |
| 13682_47  | M-CSF R                                    | Macrophage colony-stimulating factor 1 receptor                                    | P07333 | CSF1R     | chr5:150113372  | Wald ratio                | 1  | -0.071 | 0.071 | 3.179E-01 | 0.943 | cis | SARS-CoV-2 infection |
| 13119_26  | protein Z inhibitor                        | Protein Z-dependent protease inhibitor                                             | Q9UK55 | SERPINA10 | chr14:94293268  | Inverse variance weighted | 6  | 0.011  | 0.011 | 3.179E-01 | 0.943 | cis | SARS-CoV-2 infection |
| 8229_1    | GXLT1                                      | Glucoside xylosyltransferase 1                                                     | Q4G148 | GXYLT1    | chr12:42144874  | Inverse variance weighted | 5  | 0.013  | 0.013 | 3.193E-01 | 0.944 | cis | SARS-CoV-2 infection |
| 18180_58  | RT411                                      | Reticulon-4-interacting protein 1, mitochondrial                                   | Q8WWV3 | RTN4IP1   | chr6:106629498  | Wald ratio                | 1  | -0.076 | 0.076 | 3.197E-01 | 0.944 | cis | SARS-CoV-2 infection |
| 11424_4   | FAAA                                       | Fumarylacetoacetase                                                                | P16930 | FAH       | chr5:80152490   | Inverse variance weighted | 6  | -0.010 | 0.010 | 3.209E-01 | 0.944 | cis | SARS-CoV-2 infection |
| 3168_8    | ADAMTS-5                                   | A disintegrin and metalloproteinase with thrombospondin motifs 5                   | Q9UNAO | ADAMTS5   | chr21:26967088  | Inverse variance weighted | 5  | -0.012 | 0.012 | 3.220E-01 | 0.944 | cis | SARS-CoV-2 infection |
| 5006_71   | MK13                                       | Mitogen-activated protein kinase 13                                                | O15264 | MAPK13    | chr6:36127809   | Wald ratio                | 1  | -0.049 | 0.050 | 3.221E-01 | 0.944 | cis | SARS-CoV-2 infection |
| 18185_118 | ALDOB                                      | Fructose-bisphosphate aldolase B                                                   | P05062 | ALDOB     | chr9:101449664  | Inverse variance weighted | 2  | 0.016  | 0.016 | 3.228E-01 | 0.944 | cis | SARS-CoV-2 infection |
| 16872_248 | MAAI                                       | Maleylacetoacetase isomerase                                                       | O43708 | GSTZ1     | chr14:77320996  | Inverse variance weighted | 8  | 0.008  | 0.008 | 3.243E-01 | 0.944 | cis | SARS-CoV-2 infection |
| 8697_38   | Glypican 1                                 | Glypican-1                                                                         | P35052 | GPC1      | chr2:240435663  | Inverse variance weighted | 6  | -0.013 | 0.013 | 3.243E-01 | 0.944 | cis | SARS-CoV-2 infection |
| 9545_156  | Granzyme K                                 | Granzyme K                                                                         | P49863 | GZMK      | chr5:55024256   | Wald ratio                | 1  | -0.032 | 0.033 | 3.246E-01 | 0.944 | cis | SARS-CoV-2 infection |
| 2687_2    | MIA                                        | Melanoma-derived growth regulatory protein                                         | Q16674 | MIA       | chr19:40771648  | Inverse variance weighted | 7  | -0.009 | 0.009 | 3.247E-01 | 0.944 | cis | SARS-CoV-2 infection |
| 9172_69   | MMP-8                                      | Neutrophil collagenase                                                             | P22894 | MMP8      | chr11:102727050 | Wald ratio                | 1  | 0.048  | 0.049 | 3.251E-01 | 0.944 | cis | SARS-CoV-2 infection |
| 17756_69  | DCTD                                       | Deoxycytidylate deaminase                                                          | P32321 | DCTD      | chr4:182917936  | Inverse variance weighted | 2  | 0.047  | 0.048 | 3.257E-01 | 0.944 | cis | SARS-CoV-2 infection |
| 8250_2    | PTPRJ                                      | Receptor-type tyrosine-protein phosphatase eta                                     | Q12913 | PTPRJ     | chr11:47980425  | Inverse variance weighted | 3  | 0.060  | 0.061 | 3.258E-01 | 0.944 | cis | SARS-CoV-2 infection |
| 15427_35  | LOXL3                                      | Lysyl oxidase homolog 3                                                            | P58215 | LOXL3     | chr2:74555690   | Wald ratio                | 1  | 0.054  | 0.055 | 3.261E-01 | 0.944 | cis | SARS-CoV-2 infection |
| 15513_108 | Prostasin                                  | Prostasin                                                                          | Q16651 | PRSS8     | chr16:31135727  | Inverse variance weighted | 2  | 0.057  | 0.058 | 3.270E-01 | 0.945 | cis | SARS-CoV-2 infection |
| 13059_33  | RIFK                                       | Riboflavin kinase                                                                  | Q969G6 | RFK       | chr9:76394517   | Inverse variance weighted | 2  | 0.038  | 0.039 | 3.301E-01 | 0.947 | cis | SARS-CoV-2 infection |
| 10974_20  | ISK7                                       | Serine protease inhibitor Kazal-type 7                                             | P58062 | SPINK7    | chr5:148312419  | Wald ratio                | 1  | 0.040  | 0.041 | 3.305E-01 | 0.947 | cis | SARS-CoV-2 infection |
| 2700_56   | Protein S                                  | Vitamin K-dependent protein S                                                      | P07225 | PROS1     | chr3:93980003   | Wald ratio                | 1  | -0.083 | 0.085 | 3.306E-01 | 0.947 | cis | SARS-CoV-2 infection |
| 7947_19   | AP4AT                                      | AP-4 complex accessory subunit tepsin                                              | Q96N21 | TEPSIN    | chr17:81239091  | Wald ratio                | 1  | 0.084  | 0.086 | 3.310E-01 | 0.947 | cis | SARS-CoV-2 infection |
| 18896_23  | H6ST3                                      | Heparan sulfate 6-O-sulfotransferase 3                                             | Q8IZP7 | H565T3    | chr13:96090107  | Wald ratio                | 1  | 0.048  | 0.050 | 3.315E-01 | 0.947 | cis | SARS-CoV-2 infection |
| 3420_21   | Carbonic anhydrase XIII                    | Carbonic anhydrase 13                                                              | Q8N1Q1 | CA13      | chr8:85220587   | Inverse variance weighted | 3  | -0.017 | 0.017 | 3.316E-01 | 0.947 | cis | SARS-CoV-2 infection |
| 3835_11   | TLR2                                       | Toll-like receptor 2                                                               | O60603 | TLR2      | chr4:153684070  | Wald ratio                | 1  | 0.123  | 0.127 | 3.317E-01 | 0.947 | cis | SARS-CoV-2 infection |
| 10037_98  | SIG12:Ig-like V-type 2                     | Sialic acid-binding Ig-like lectin 12:Ig-like V-type 2 domain, Isoform long        | Q96PQ1 | SIGLEC12  | chr19:51501800  | Inverse variance weighted | 4  | -0.029 | 0.030 | 3.338E-01 | 0.951 | cis | SARS-CoV-2 infection |
| 9838_4    | SMAD1                                      | Mothers against decapentaplegic homolog 1                                          | Q15797 | SMAD1     | chr4:145481194  | Wald ratio                | 1  | -0.092 | 0.095 | 3.347E-01 | 0.952 | cis | SARS-CoV-2 infection |
| 18934_50  | Tissue transglutaminase                    | Protein-glutamine gamma-glutamyltransferase 2                                      | P21980 | TGM2      | chr20:38166578  | Wald ratio                | 1  | 0.025  | 0.026 | 3.355E-01 | 0.953 | cis | SARS-CoV-2 infection |
| 11208_15  | NAGPA                                      | N-acetylglucosamine-1-phosphodiester alpha-N-acetylglucosaminidase                 | Q9UK23 | NAGPA     | chr16:5034141   | Inverse variance weighted | 7  | 0.013  | 0.013 | 3.362E-01 | 0.953 | cis | SARS-CoV-2 infection |
| 18933_4   | TGM4                                       | Protein-glutamine gamma-glutamyltransferase 4                                      | P49221 | TGM4      | chr3:44874608   | Wald ratio                | 1  | -0.086 | 0.090 | 3.383E-01 | 0.956 | cis | SARS-CoV-2 infection |
| 3519_3    | TARC                                       | C-C motif chemokine 17                                                             | Q92583 | CCL17     | chr16:57404767  | Inverse variance weighted | 2  | 0.024  | 0.025 | 3.383E-01 | 0.956 | cis | SARS-CoV-2 infection |
| 15539_15  | SLIK1                                      | SLIT and NTRK-like protein 1                                                       | Q96P88 | SLITRK1   | chr13:83882474  | Wald ratio                | 1  | -0.070 | 0.074 | 3.399E-01 | 0.958 | cis | SARS-CoV-2 infection |
| 19135_5   | Cytosolic 5'-nucleotidase III-like protein | 7-methylguanosine phosphatase-specific 5'-nucleotidase                             | Q96977 | NTS3C8    | chr17:41836260  | Inverse variance weighted | 9  | -0.012 | 0.012 | 3.404E-01 | 0.958 | cis | SARS-CoV-2 infection |
| 5737_61   | SEMA4D                                     | Semaphorin-4D                                                                      | Q92854 | SEMA4D    | chr9:89498130   | Inverse variance weighted | 6  | 0.010  | 0.010 | 3.425E-01 | 0.961 | cis | SARS-CoV-2 infection |
| 6927_7    | NDST1                                      | Bifunctional heparan sulfate N-deacetylase/N-sulfotransferase 1                    | P52848 | NDST1     | chr5:150485818  | Wald ratio                | 1  | -0.033 | 0.035 | 3.448E-01 | 0.961 | cis | SARS-CoV-2 infection |
| 11219_95  | FGFP3                                      | Fibroblast growth factor-binding protein 3                                         | Q8AT72 | FGFBP3    | chr10:91909486  | Inverse variance weighted | 3  | 0.015  | 0.016 | 3.468E-01 | 0.961 | cis | SARS-CoV-2 infection |
| 16596_25  | GLRX3                                      | Glutaredoxin-3                                                                     | O76003 | GLRX3     | chr10:130136391 | Wald ratio                | 1  | -0.055 | 0.059 | 3.470E-01 | 0.961 | cis | SARS-CoV-2 infection |
| 9321_400  | NMB                                        | Neuromedin-B                                                                       | P08949 | NMB       | chr5:184658563  | Inverse variance weighted | 2  | 0.029  | 0.031 | 3.473E-01 | 0.961 | cis | SARS-CoV-2 infection |
| 18839_24  | Thyroglobulin                              | Thyroglobulin                                                                      | P01266 | TG        | chr8:132866958  | Wald ratio                | 1  | 0.057  | 0.061 | 3.492E-01 | 0.961 | cis | SARS-CoV-2 infection |
| 6558_5    | COL10                                      | Collectin-10                                                                       | Q9Y627 | COLEC10   | chr8:118995452  | Wald ratio                | 1  | 0.092  | 0.099 | 3.495E-01 | 0.961 | cis | SARS-CoV-2 infection |
| 8006_12   | DJB12                                      | Dnaj homolog subfamily B member 12                                                 | Q9NWX2 | DNAJB12   | chr10:72355149  | Wald ratio                | 1  | 0.052  | 0.056 | 3.502E-01 | 0.961 | cis | SARS-CoV-2 infection |
| 2974_61   | contactin-1                                | Contactin-1                                                                        | Q12860 | CNTN1     | chr12:40692439  | Inverse variance weighted | 4  | 0.015  | 0.016 | 3.507E-01 | 0.961 | cis | SARS-CoV-2 infection |
| 19637_9   | CRH                                        | Corticotiberin                                                                     | P06850 | CRH       | chr8:66178464   | Wald ratio                | 1  | 0.076  | 0.081 | 3.510E-01 | 0.961 | cis | SARS-CoV-2 infection |

|           |                                  |                                                                         |        |          |                 |                           |    |        |       |           |       |     |                      |
|-----------|----------------------------------|-------------------------------------------------------------------------|--------|----------|-----------------|---------------------------|----|--------|-------|-----------|-------|-----|----------------------|
| 7980_72   | B3GN2                            | N-acetyllactosaminide beta-1,3-N-acetylglucosaminyltransferase 2        | Q9NY97 | B3GNT2   | chr2:62196115   | Inverse variance weighted | 3  | 0.030  | 0.032 | 3.513E-01 | 0.961 | cis | SARS-CoV-2 infection |
| 15529_33  | Cysteine-rich protein 1          | Cysteine and glycine-rich protein 1                                     | P21291 | CSRP1    | chr1:201509456  | Wald ratio                | 1  | 0.048  | 0.051 | 3.528E-01 | 0.961 | cis | SARS-CoV-2 infection |
| 19194_9   | Histidyl-tRNA synthetase-related | D-tyrosyl-tRNA(Tyr) deacylase 1                                         | Q8TEA8 | DTD1     | chr20:18587942  | Wald ratio                | 1  | 0.026  | 0.028 | 3.545E-01 | 0.961 | cis | SARS-CoV-2 infection |
| 16882_27  | PHP14                            | 14 kDa phosphohistidine phosphatase                                     | Q9NRX4 | PHPT1    | chr19:136848724 | Inverse variance weighted | 2  | 0.069  | 0.075 | 3.554E-01 | 0.961 | cis | SARS-CoV-2 infection |
| 3607_71   | DKK3                             | Dickkopf-related protein 3                                              | Q9UBP4 | DKK3     | chr11:12009769  | Inverse variance weighted | 4  | -0.016 | 0.018 | 3.555E-01 | 0.961 | cis | SARS-CoV-2 infection |
| 12549_33  | PTGD2                            | Hematopoietic prostaglandin D synthase                                  | O60760 | HPGD5    | chr4:94342876   | Inverse variance weighted | 9  | 0.009  | 0.010 | 3.555E-01 | 0.961 | cis | SARS-CoV-2 infection |
| 6715_63   | PPB8                             | Alkaline phosphatase, placental-like                                    | P10696 | ALPG     | chr2:232406844  | Inverse variance weighted | 3  | 0.027  | 0.029 | 3.558E-01 | 0.961 | cis | SARS-CoV-2 infection |
| 15398_2   | HERV1                            | FAD-linked sulphydryl oxidase ALR                                       | P55789 | GFER     | chr16:1984193   | Wald ratio                | 1  | -0.079 | 0.086 | 3.561E-01 | 0.961 | cis | SARS-CoV-2 infection |
| 3213_65   | Nidogen-1                        | Nidogen-1                                                               | P14543 | NID1     | chr1:236065109  | Inverse variance weighted | 4  | 0.026  | 0.029 | 3.570E-01 | 0.961 | cis | SARS-CoV-2 infection |
| 9322_15   | RCN1                             | Reticulocalbin-1                                                        | Q15293 | RCN1     | chr11:32091074  | Wald ratio                | 1  | -0.034 | 0.037 | 3.571E-01 | 0.961 | cis | SARS-CoV-2 infection |
| 10938_13  | sLFA-3                           | Lymphocyte function-associated antigen 3                                | P19256 | CD58     | chr1:116571039  | Inverse variance weighted | 2  | -0.025 | 0.027 | 3.571E-01 | 0.961 | cis | SARS-CoV-2 infection |
| 3421_54   | CD30 Ligand                      | Tumor necrosis factor ligand superfamily member 8                       | P32971 | TNFSF8   | chr9:114930595  | Inverse variance weighted | 2  | -0.040 | 0.043 | 3.575E-01 | 0.961 | cis | SARS-CoV-2 infection |
| 13717_15  | FCN2                             | Ficolin-2                                                               | Q15485 | FCN2     | chr9:134880810  | Inverse variance weighted | 8  | -0.015 | 0.016 | 3.591E-01 | 0.961 | cis | SARS-CoV-2 infection |
| 13438_115 | CHRD                             | Chordin                                                                 | Q9H2X0 | CHRD     | chr3:184380054  | Wald ratio                | 1  | -0.063 | 0.069 | 3.600E-01 | 0.961 | cis | SARS-CoV-2 infection |
| 3719_2    | p27Kip1                          | Cyclin-dependent kinase inhibitor 1B                                    | P46527 | CDKN1B   | chr12:12685498  | Wald ratio                | 1  | -0.055 | 0.061 | 3.613E-01 | 0.961 | cis | SARS-CoV-2 infection |
| 2741_22   | Siglec-6                         | Sialic acid-binding Ig-like lectin 6                                    | O43699 | SIGLEC6  | chr19:51531856  | Inverse variance weighted | 7  | -0.012 | 0.014 | 3.627E-01 | 0.961 | cis | SARS-CoV-2 infection |
| 18338_26  | IDH                              | Isocitrate dehydrogenase [NADP] cytoplasmic                             | O75874 | IDH1     | chr2:208266074  | Inverse variance weighted | 3  | -0.014 | 0.016 | 3.631E-01 | 0.961 | cis | SARS-CoV-2 infection |
| 3191_50   | WFKM1                            | WAP, kazal, immunoglobulin, kunitz and NTR domain-containing protein 1  | Q96N28 | WFIKN1   | chr16:629239    | Inverse variance weighted | 2  | 0.031  | 0.034 | 3.636E-01 | 0.961 | cis | SARS-CoV-2 infection |
| 12659_13  | GTPB9                            | Obg-like ATPase 1                                                       | Q9NTK5 | OLA1     | chr2:174248599  | Wald ratio                | 1  | 0.048  | 0.053 | 3.642E-01 | 0.961 | cis | SARS-CoV-2 infection |
| 15472_16  | LRP11                            | Low-density lipoprotein receptor-related protein 11                     | Q86V24 | LRP11    | chr6:149864359  | Inverse variance weighted | 6  | -0.020 | 0.022 | 3.643E-01 | 0.961 | cis | SARS-CoV-2 infection |
| 3302_58   | CYTF                             | Cystatin-F                                                              | O76096 | CST7     | chr20:24949269  | Inverse variance weighted | 7  | -0.009 | 0.010 | 3.647E-01 | 0.961 | cis | SARS-CoV-2 infection |
| 9369_174  | NGL1                             | Leucine-rich repeat-containing protein 4C                               | Q9HCJ2 | LRRAC    | chr11:41459773  | Inverse variance weighted | 3  | -0.042 | 0.046 | 3.650E-01 | 0.961 | cis | SARS-CoV-2 infection |
| 7891_45   | UGT 1A6                          | UDP-glucuronosyltransferase 1-6                                         | P19224 | UGT1A6   | chr2:233691607  | Inverse variance weighted | 4  | -0.023 | 0.025 | 3.664E-01 | 0.961 | cis | SARS-CoV-2 infection |
| 12338_27  | EGFLA                            | Pikachurin                                                              | Q63HQ2 | EGFLAM   | chr5:38258409   | Inverse variance weighted | 3  | 0.016  | 0.017 | 3.669E-01 | 0.961 | cis | SARS-CoV-2 infection |
| 19563_3   | SEZ6L                            | Seizure 6-like protein                                                  | Q9BYH1 | SEZ6L    | chr22:26169462  | Inverse variance weighted | 3  | 0.041  | 0.046 | 3.673E-01 | 0.961 | cis | SARS-CoV-2 infection |
| 3580_25   | a1-Antitrypsin                   | Alpha-1-antitrypsin                                                     | P01009 | SERPINA1 | chr14:94390693  | Inverse variance weighted | 7  | 0.008  | 0.009 | 3.674E-01 | 0.961 | cis | SARS-CoV-2 infection |
| 8957_72   | XTBP8                            | Endoplasmic reticulum lectin 1                                          | Q96D21 | ERLEC1   | chr2:53787009   | Wald ratio                | 1  | -0.065 | 0.073 | 3.694E-01 | 0.961 | cis | SARS-CoV-2 infection |
| 11257_1   | DHPR                             | Dihydropteridine reductase                                              | P09417 | QDPR     | chr4:17512206   | Inverse variance weighted | 4  | 0.015  | 0.017 | 3.699E-01 | 0.961 | cis | SARS-CoV-2 infection |
| 3194_36   | GPVI                             | Platelet glycoprotein VI                                                | Q9HCN6 | GP6      | chr19:55038264  | Inverse variance weighted | 2  | -0.017 | 0.018 | 3.706E-01 | 0.961 | cis | SARS-CoV-2 infection |
| 3326_58   | Nectin-like protein 2            | Cell adhesion molecule 1                                                | Q9BY67 | CADM1    | chr11:115504957 | Wald ratio                | 1  | 0.031  | 0.035 | 3.707E-01 | 0.961 | cis | SARS-CoV-2 infection |
| 9574_11   | BIN1                             | Myc box-dependent-interacting protein 1                                 | O00499 | BIN1     | chr2:127107288  | Inverse variance weighted | 2  | 0.031  | 0.034 | 3.719E-01 | 0.961 | cis | SARS-CoV-2 infection |
| 17808_37  | NIT2                             | Omega-amidase NIT2                                                      | Q9NRQ4 | NIT2     | chr3:100334739  | Inverse variance weighted | 2  | 0.037  | 0.041 | 3.719E-01 | 0.961 | cis | SARS-CoV-2 infection |
| 9599_6    | PIANP                            | PILR alpha-associated neural protein                                    | Q8IYJ0 | PIANP    | chr12:6700815   | Wald ratio                | 1  | -0.093 | 0.105 | 3.730E-01 | 0.961 | cis | SARS-CoV-2 infection |
| 5465_32   | H6ST1                            | Heparan sulfate 6-O-sulfotransferase 1                                  | O60243 | H56ST1   | chr2:128318868  | Inverse variance weighted | 2  | -0.026 | 0.029 | 3.734E-01 | 0.961 | cis | SARS-CoV-2 infection |
| 2774_10   | IL-16                            | Interleukin-16                                                          | Q14005 | IL16     | chr15:81159575  | Inverse variance weighted | 10 | -0.009 | 0.010 | 3.749E-01 | 0.961 | cis | SARS-CoV-2 infection |
| 9341_1    | PDGFD                            | Platelet-derived growth factor D                                        | Q9GZP0 | PDGFD    | chr11:104164379 | Inverse variance weighted | 3  | 0.052  | 0.059 | 3.761E-01 | 0.961 | cis | SARS-CoV-2 infection |
| 8893_29   | PARP:region 1                    | Poly [ADP-ribose] polymerase 1:region 1                                 | P09874 | PARP1    | chr1:226408154  | Wald ratio                | 1  | -0.082 | 0.093 | 3.762E-01 | 0.961 | cis | SARS-CoV-2 infection |
| 6605_17   | IGFALS                           | Insulin-like growth factor-binding protein complex alpha labile subunit | P35858 | IGFALS   | chr16:1794971   | Inverse variance weighted | 3  | 0.039  | 0.044 | 3.762E-01 | 0.961 | cis | SARS-CoV-2 infection |
| 15622_13  | OBCAM                            | Opioid-binding protein/cell adhesion molecule                           | Q14982 | OPCML    | chr11:133532501 | Wald ratio                | 1  | -0.089 | 0.101 | 3.763E-01 | 0.961 | cis | SARS-CoV-2 infection |
| 9834_62   | ADH1B                            | Alcohol dehydrogenase 1B                                                | P00325 | ADH1B    | chr4:99352760   | Wald ratio                | 1  | 0.044  | 0.050 | 3.770E-01 | 0.961 | cis | SARS-CoV-2 infection |
| 4499_21   | PDGF-AA                          | Platelet-derived growth factor subunit A                                | P04085 | PDGFA    | chr7:520296     | Inverse variance weighted | 3  | -0.049 | 0.055 | 3.771E-01 | 0.961 | cis | SARS-CoV-2 infection |
| 9204_33   | Corticotropin-lipotropin         | Pro-opiomelanocortin                                                    | P01189 | POMC     | chr2:25168903   | Inverse variance weighted | 3  | -0.046 | 0.052 | 3.775E-01 | 0.961 | cis | SARS-CoV-2 infection |
| 7810_20   | C1QTNF5                          | Complement C1q tumor necrosis factor-related protein 5                  | Q9BXJ0 | C1QTNF5  | chr11:119340940 | Inverse variance weighted | 2  | -0.019 | 0.022 | 3.781E-01 | 0.961 | cis | SARS-CoV-2 infection |
| 2851_63   | C5a                              | C5a anaphylatoxin                                                       | P01031 | C5       | chr9:121075195  | Inverse variance weighted | 2  | 0.035  | 0.039 | 3.784E-01 | 0.961 | cis | SARS-CoV-2 infection |
| 12370_30  | Apo F                            | Apolipoprotein F                                                        | Q13790 | APOF     | chr12:56362857  | Inverse variance weighted | 3  | -0.027 | 0.030 | 3.791E-01 | 0.961 | cis | SARS-CoV-2 infection |
| 6207_10   | prosaposin                       | Prosaposin                                                              | P07602 | PSAP     | chr10:71851251  | Inverse variance weighted | 3  | 0.016  | 0.018 | 3.797E-01 | 0.961 | cis | SARS-CoV-2 infection |
| 12620_3   | Septin-11                        | Septin-11                                                               | Q9NVA2 | SEPTIN11 | chr4:76949751   | Wald ratio                | 1  | -0.070 | 0.080 | 3.805E-01 | 0.961 | cis | SARS-CoV-2 infection |
| 17782_23  | THIK                             | 3-ketoacyl-CoA thiolase, peroxisomal                                    | P09110 | ACAA1    | chr3:38137242   | Inverse variance weighted | 5  | 0.015  | 0.017 | 3.812E-01 | 0.961 | cis | SARS-CoV-2 infection |
| 3171_57   | amyloid precursor protein        | Amyloid beta A4 protein                                                 | P05067 | APP      | chr21:26171128  | Wald ratio                | 1  | 0.055  | 0.063 | 3.822E-01 | 0.961 | cis | SARS-CoV-2 infection |
| 8255_34   | MRV11                            | Protein MRV11                                                           | Q9Y6F6 | IRAG1    | chr11:10693988  | Inverse variance weighted | 2  | -0.038 | 0.044 | 3.875E-01 | 0.961 | cis | SARS-CoV-2 infection |
| 11568_2   | FKB1B                            | Peptidyl-prolyl cis-trans isomerase FKBP1B                              | P68106 | FKBP1B   | chr2:24049701   | Wald ratio                | 1  | -0.037 | 0.043 | 3.875E-01 | 0.961 | cis | SARS-CoV-2 infection |
| 17751_68  | CRBB1                            | Beta-crystallin B1                                                      | P53674 | CRYBB1   | chr22:26618027  | Wald ratio                | 1  | -0.023 | 0.027 | 3.882E-01 | 0.961 | cis | SARS-CoV-2 infection |
| 5593_11   | PDIA5                            | Protein disulfide-isomerase A5                                          | Q14554 | PDIA5    | chr3:123067025  | Inverse variance weighted | 8  | -0.007 | 0.008 | 3.890E-01 | 0.961 | cis | SARS-CoV-2 infection |
| 18830_1   | Omentin                          | Intelectin-1                                                            | Q8WWA0 | ITLN1    | chr1:160885180  | Wald ratio                | 1  | 0.069  | 0.080 | 3.891E-01 | 0.961 | cis | SARS-CoV-2 infection |
| 3364_76   | Cathepsin V                      | Cathepsin L2                                                            | O60911 | CTSV     | chr9:97156556   | Inverse variance weighted | 4  | -0.025 | 0.029 | 3.893E-01 | 0.961 | cis | SARS-CoV-2 infection |
| 18432_32  | RALB                             | Ras-related protein Ral-B                                               | P11234 | RALB     | chr2:120240064  | Wald ratio                | 1  | -0.018 | 0.021 | 3.894E-01 | 0.961 | cis | SARS-CoV-2 infection |
| 4886_3    | MCP-3                            | C-C motif chemokine 7                                                   | R80098 | CCL7     | chr17:34270221  | Inverse variance weighted | 4  | -0.018 | 0.021 | 3.895E-01 | 0.961 | cis | SARS-CoV-2 infection |
| 4413_3    | SLPI                             | Antileukoprotease                                                       | P03973 | SLPI     | chr20:45254564  | Wald ratio                | 1  | -0.082 | 0.095 | 3.899E-01 | 0.961 | cis | SARS-CoV-2 infection |
| 4563_61   | PLCG1                            | 1-phosphatidylinositol 4,5-bisphosphate phosphodiesterase gamma-1       | P19174 | PLCG1    | chr20:41136960  | Wald ratio                | 1  | -0.074 | 0.086 | 3.901E-01 | 0.961 | cis | SARS-CoV-2 infection |
| 4960_72   | annexin I                        | Annexin A1                                                              | P04083 | ANXA1    | chr9:73151865   | Wald ratio                | 1  | 0.033  | 0.038 | 3.911E-01 | 0.961 | cis | SARS-CoV-2 infection |
| 4324_33   | CYTT                             | Cystatin-SA                                                             | P09228 | CST2     | chr20:23826729  | Inverse variance weighted | 5  | 0.047  | 0.055 | 3.911E-01 | 0.961 | cis | SARS-CoV-2 infection |
| 15594_47  | HTRA1                            | Serine protease HTRA1                                                   | Q92743 | HTRA1    | chr10:122458551 | Inverse variance weighted | 2  | -0.042 | 0.049 | 3.913E-01 | 0.961 | cis | SARS-CoV-2 infection |
| 9348_1    | C1RL1                            | Complement C1r subcomponent-like protein                                | Q9NZP8 | C1RL     | chr12:7109238   | Wald ratio                | 1  | -0.063 | 0.073 | 3.914E-01 | 0.961 | cis | SARS-CoV-2 infection |
| 15394_79  | UNC5B                            | Netrin receptor UNC5B                                                   | P03973 | UNC5B    | chr10:71212570  | Inverse variance weighted | 3  | -0.030 | 0.035 | 3.929E-01 | 0.961 | cis | SARS-CoV-2 infection |
| 7185_29   | GPV                              | Platelet glycoprotein V                                                 | P40197 | GP5      | chr3:194399266  | Inverse variance weighted | 2  | -0.047 | 0.055 | 3.935E-01 | 0.961 | cis | SARS-CoV-2 infection |
| 12517_52  | TFAR19                           | Programmed cell death protein 5                                         | O14737 | PDCD5    | chr19:32581190  | Inverse variance weighted | 4  | 0.013  | 0.015 | 3.952E-01 | 0.961 | cis | SARS-CoV-2 infection |
| 9832_33   | HGD                              | Homogentisate 1,2-dioxygenase                                           | Q93099 | HGD      | chr3:120682269  | Inverse variance weighted | 2  | -0.034 | 0.040 | 3.957E-01 | 0.961 | cis | SARS-CoV-2 infection |
| 15558_63  | AMPE                             | Glutaryl aminopeptidase                                                 | Q07075 | ENPEP    | chr4:110365733  | Inverse variance weighted | 8  | 0.013  | 0.015 | 3.962E-01 | 0.961 | cis | SARS-CoV-2 infection |
| 18342_2   | SERC                             | Phosphoserine aminotransferase                                          | Q9Y617 | PSAT1    | chr9:78297125   | Inverse variance weighted | 2  | -0.031 | 0.036 | 3.964E-01 | 0.961 | cis | SARS-CoV-2 infection |
| 8097_77   | LIPN                             | Lipase member N                                                         | Q5VXJ9 | LIPN     | chr10:88759982  | Inverse variance weighted | 6  | -0.009 | 0.011 | 3.964E-01 | 0.961 | cis | SARS-CoV-2 infection |
| 18435_40  | UBX2B                            | UBX domain-containing protein 2B                                        | Q14CS0 | UBXN2B   | chr8:58411359   | Wald ratio                | 1  | -0.068 | 0.080 | 3.972E-01 | 0.961 | cis | SARS-CoV-2 infection |
| 8773_172  | EMIL3:region 1                   | EMILIN-3:region 1                                                       | Q9NT22 | EMILIN3  | chr20:41366818  | Inverse variance weighted | 6  | -0.013 | 0.015 | 3.977E-01 | 0.961 | cis | SARS-CoV-2 infection |
| 9759_13   | INDO                             | Indoleamine 2,3-dioxygenase 1                                           | P14902 | IDO1     | chr8:39902275   | Wald ratio                | 1  | 0.070  | 0.083 | 3.979E-01 | 0.961 | cis | SARS-CoV-2 infection |
| 10948_14  | PLD3                             | Phospholipase D3                                                        | Q8IV08 | PLD3     | chr19:40348456  | Wald ratio                | 1  | 0.081  | 0.096 | 3.982E-01 | 0.961 | cis | SARS-CoV-2 infection |
| 3050_7    | vWF                              | von Willebrand factor                                                   | P04275 | VWF      | chr12:6124770   | Inverse variance weighted | 4  | 0.034  | 0.040 | 3.987E-01 | 0.961 | cis | SARS-CoV-2 infection |
| 9394_19   | Aminopeptidase                   | Carboxypeptidase Q                                                      | Q9Y646 | CPQ      | chr8:96645242   | Inverse variance weighted | 8  | 0.010  | 0.011 | 3.987E-01 | 0.961 | cis | SARS-CoV-2 infection |
| 9126_171  | NTSD3                            | 5'-nucleotidase domain-containing protein 3                             | Q86VY8 | NTSDC3   | chr12:103841234 | Inverse variance weighted | 2  | 0.025  | 0.029 | 3.990E-01 | 0.961 | cis | SARS-CoV-2 infection |
| 11161_5   | SPG20                            | Spartin                                                                 | Q8NQX7 | SPART    | chr13:36370180  | Wald ratio                | 1  | 0.083  | 0.099 | 4.004E-01 | 0.961 | cis | SARS-CoV-2 infection |

|           |                                     |                                                                               |        |          |                 |                           |    |        |       |           |       |     |                      |
|-----------|-------------------------------------|-------------------------------------------------------------------------------|--------|----------|-----------------|---------------------------|----|--------|-------|-----------|-------|-----|----------------------|
| 17698_15  | WBP2                                | WW domain-binding protein 2                                                   | Q969T9 | WBP2     | chr17:75856507  | Wald ratio                | 1  | -0.083 | 0.099 | 4.016E-01 | 0.961 | cis | SARS-CoV-2 infection |
| 5132_71   | TCCR                                | Interleukin-27 receptor subunit alpha                                         | Q6UWB1 | IL27RA   | chr19:14031762  | Inverse variance weighted | 7  | -0.008 | 0.009 | 4.016E-01 | 0.961 | cis | SARS-CoV-2 infection |
| 17755_5   | UGDH                                | UDP-glucose 6-dehydrogenase                                                   | O60701 | UGDH     | chr4:39528311   | Inverse variance weighted | 3  | 0.018  | 0.022 | 4.019E-01 | 0.961 | cis | SARS-CoV-2 infection |
| 11649_3   | SMAP1                               | Stromal membrane-associated protein 1                                         | Q8IYB5 | SMAP1    | chr6:70667776   | Inverse variance weighted | 4  | -0.012 | 0.015 | 4.049E-01 | 0.961 | cis | SARS-CoV-2 infection |
| 5852_6    | S100A12                             | Protein S100-A12                                                              | P80511 | S100A12  | chr1:153375621  | Inverse variance weighted | 2  | 0.033  | 0.040 | 4.053E-01 | 0.961 | cis | SARS-CoV-2 infection |
| 8080_24   | PSMP                                | Prostate-associated microseminoprotein                                        | Q1L6U9 | MSMP     | chr9:35755613   | Wald ratio                | 1  | 0.062  | 0.075 | 4.066E-01 | 0.961 | cis | SARS-CoV-2 infection |
| 3344_60   | Antithrombin III                    | Antithrombin-III                                                              | P01008 | SERPINC1 | chr1:173917327  | Wald ratio                | 1  | 0.069  | 0.083 | 4.069E-01 | 0.961 | cis | SARS-CoV-2 infection |
| 5598_3    | GREM2                               | Gremlin-2                                                                     | Q9H772 | GREM2    | chr1:240612155  | Wald ratio                | 1  | -0.069 | 0.084 | 4.090E-01 | 0.961 | cis | SARS-CoV-2 infection |
| 17802_4   | SIA5                                | Sialic acid synthase                                                          | Q9NR45 | NAN5     | chr9:98056732   | Wald ratio                | 1  | -0.046 | 0.056 | 4.106E-01 | 0.961 | cis | SARS-CoV-2 infection |
| 3806_55   | EphA5                               | Ephrin type-A receptor 5                                                      | P54756 | EPHA5    | chr4:65670495   | Inverse variance weighted | 3  | 0.034  | 0.041 | 4.109E-01 | 0.961 | cis | SARS-CoV-2 infection |
| 4548_4    | Fucosyltransferase 3                | Galactoside 3(4)-L-fucosyltransferase                                         | P21217 | FUT3     | chr19:5851471   | Inverse variance weighted | 9  | -0.015 | 0.018 | 4.123E-01 | 0.961 | cis | SARS-CoV-2 infection |
| 13931_22  | PSMD9                               | 26S proteasome non-ATPase regulatory subunit 9                                | O00233 | PSMD9    | chr12:121888732 | Wald ratio                | 1  | 0.032  | 0.039 | 4.124E-01 | 0.961 | cis | SARS-CoV-2 infection |
| 16853_5   | NRK1                                | Nicotinamide riboside kinase 1                                                | Q9NWW6 | NMRK1    | chr9:75088217   | Inverse variance weighted | 2  | 0.024  | 0.030 | 4.129E-01 | 0.961 | cis | SARS-CoV-2 infection |
| 19523_215 | PARK7                               | Protein DJ-1                                                                  | Q99497 | PARK7    | chr1:7954291    | Wald ratio                | 1  | -0.037 | 0.045 | 4.130E-01 | 0.961 | cis | SARS-CoV-2 infection |
| 5085_18   | IL-20 Ra                            | Interleukin-20 receptor subunit alpha                                         | Q9UHF4 | IL20RA   | chr6:137045180  | Wald ratio                | 1  | 0.069  | 0.085 | 4.134E-01 | 0.961 | cis | SARS-CoV-2 infection |
| 4314_12   | XTP3A                               | dCTP pyrophosphatase 1                                                        | Q9H773 | DCPPP1   | chr16:30430030  | Wald ratio                | 1  | -0.059 | 0.072 | 4.137E-01 | 0.961 | cis | SARS-CoV-2 infection |
| 13114_50  | Lumican                             | Lumican                                                                       | P51884 | LUM      | chr12:91111494  | Inverse variance weighted | 7  | -0.015 | 0.018 | 4.138E-01 | 0.961 | cis | SARS-CoV-2 infection |
| 3807_1    | FGF23                               | Fibroblast growth factor 23                                                   | Q9GZV9 | FGF23    | chr12:4379712   | Wald ratio                | 1  | -0.077 | 0.094 | 4.141E-01 | 0.961 | cis | SARS-CoV-2 infection |
| 17333_20  | ACADM                               | Medium-chain specific acyl-CoA dehydrogenase, mitochondrial                   | P11310 | ACADM    | chr1:75724431   | Wald ratio                | 1  | 0.018  | 0.023 | 4.145E-01 | 0.961 | cis | SARS-CoV-2 infection |
| 11530_37  | HEM3                                | Porphobilinogen deaminase                                                     | P08397 | HMB5     | chr11:119084866 | Wald ratio                | 1  | -0.077 | 0.094 | 4.156E-01 | 0.961 | cis | SARS-CoV-2 infection |
| 19617_5   | LTB4DH                              | Prostaglandin reductase 1                                                     | Q14914 | PTGR1    | chr9:111599893  | Inverse variance weighted | 8  | -0.007 | 0.009 | 4.156E-01 | 0.961 | cis | SARS-CoV-2 infection |
| 3825_18   | MK08                                | Mitogen-activated protein kinase 8                                            | P45983 | MAPK8    | chr10:48306639  | Wald ratio                | 1  | -0.073 | 0.090 | 4.159E-01 | 0.961 | cis | SARS-CoV-2 infection |
| 16060_99  | NID2                                | Nidogen-2                                                                     | Q14112 | NID2     | chr14:52069059  | Inverse variance weighted | 6  | 0.010  | 0.012 | 4.160E-01 | 0.961 | cis | SARS-CoV-2 infection |
| 6467_65   | KTEL1                               | Protein O-glucosyltransferase 1                                               | Q8NB11 | POGLUT1  | chr3:119468963  | Inverse variance weighted | 3  | 0.017  | 0.021 | 4.160E-01 | 0.961 | cis | SARS-CoV-2 infection |
| 12573_80  | TRIM3                               | Tripartite motif-containing protein 3                                         | Q75382 | TRIM3    | chr11:6474459   | Wald ratio                | 1  | 0.037  | 0.045 | 4.171E-01 | 0.961 | cis | SARS-CoV-2 infection |
| 3894_15   | NAGK                                | N-acetyl-D-glucosamine kinase                                                 | Q9UI70 | NAGK     | chr2:71064344   | Inverse variance weighted | 3  | 0.021  | 0.026 | 4.173E-01 | 0.961 | cis | SARS-CoV-2 infection |
| 5066_134  | CLM6                                | CMRF35-like molecule 6                                                        | Q80708 | CD300C   | chr17:74546115  | Inverse variance weighted | 4  | -0.054 | 0.066 | 4.173E-01 | 0.961 | cis | SARS-CoV-2 infection |
| 7179_69   | NFASC                               | Neurofascin                                                                   | O94856 | NFASC    | chr1:204828651  | Inverse variance weighted | 4  | -0.011 | 0.013 | 4.173E-01 | 0.961 | cis | SARS-CoV-2 infection |
| 10558_26  | PCDH9                               | Protocadherin-9                                                               | Q9HC56 | PCDH9    | chr13:67230445  | Inverse variance weighted | 4  | -0.014 | 0.017 | 4.177E-01 | 0.961 | cis | SARS-CoV-2 infection |
| 11237_49  | PCOC1                               | Procollagen C-endopeptidase enhancer 1                                        | Q15113 | PCOLCE   | chr7:100602363  | Inverse variance weighted | 2  | 0.058  | 0.072 | 4.180E-01 | 0.961 | cis | SARS-CoV-2 infection |
| 12431_13  | PELO                                | Protein pelota homolog                                                        | Q9BRX2 | PELO     | chr5:52787916   | Wald ratio                | 1  | 0.085  | 0.105 | 4.180E-01 | 0.961 | cis | SARS-CoV-2 infection |
| 6919_3    | HBAZ                                | Hemoglobin subunit zeta                                                       | P02008 | HBZ      | chr16:142728    | Inverse variance weighted | 6  | 0.008  | 0.010 | 4.182E-01 | 0.961 | cis | SARS-CoV-2 infection |
| 2647_66   | Rab GDP dissociation inhibitor beta | Rab GDP dissociation inhibitor beta                                           | P50395 | GDI2     | chr10:5842132   | Wald ratio                | 1  | -0.040 | 0.050 | 4.189E-01 | 0.961 | cis | SARS-CoV-2 infection |
| 9841_197  | Multifunctional protein ADE2        | Multifunctional protein ADE2                                                  | P22234 | PAIC5    | chr4:56435741   | Wald ratio                | 1  | 0.049  | 0.061 | 4.200E-01 | 0.961 | cis | SARS-CoV-2 infection |
| 3044_3    | PARC                                | C-C motif chemokine 18                                                        | P55774 | CCL18    | chr17:36064272  | Inverse variance weighted | 4  | 0.031  | 0.038 | 4.209E-01 | 0.961 | cis | SARS-CoV-2 infection |
| 11643_73  | DTX3L                               | E3 ubiquitin-protein ligase DTX3L                                             | Q8TD86 | DTX3L    | chr3:122564338  | Wald ratio                | 1  | -0.059 | 0.073 | 4.214E-01 | 0.961 | cis | SARS-CoV-2 infection |
| 7933_75   | ADA22                               | Disintegrin and metalloproteinase domain-containing protein 22                | Q9P0K1 | ADAM22   | chr7:87934143   | Inverse variance weighted | 4  | -0.015 | 0.019 | 4.215E-01 | 0.961 | cis | SARS-CoV-2 infection |
| 5034_79   | Trypsin 2                           | Trypsin-2                                                                     | P07478 | PRSS2    | chr7:142760398  | Inverse variance weighted | 5  | -0.019 | 0.024 | 4.218E-01 | 0.961 | cis | SARS-CoV-2 infection |
| 4459_68   | PCSK7                               | Proprotein convertase subtilisin/kexin type 7                                 | P16549 | PCSK7    | chr11:117232525 | Inverse variance weighted | 10 | -0.009 | 0.012 | 4.226E-01 | 0.961 | cis | SARS-CoV-2 infection |
| 3805_16   | Endocan                             | Endothelial cell-specific molecule 1                                          | Q9NQ30 | ESM1     | chr5:55022671   | Inverse variance weighted | 3  | 0.025  | 0.031 | 4.227E-01 | 0.961 | cis | SARS-CoV-2 infection |
| 8973_23   | FCRL4:ECD                           | Fc receptor-like protein 4:Extracellular domain                               | Q96PJ5 | FCRL4    | chr1:157598085  | Inverse variance weighted | 13 | -0.011 | 0.014 | 4.227E-01 | 0.961 | cis | SARS-CoV-2 infection |
| 15375_49  | Carboxypeptidase B1                 | Carboxypeptidase B                                                            | P15086 | CPB1     | chr3:148791102  | Inverse variance weighted | 2  | -0.027 | 0.034 | 4.230E-01 | 0.961 | cis | SARS-CoV-2 infection |
| 5763_67   | HBD-4                               | Beta-defensin 104                                                             | Q8WTQ1 | DEFB104A | chr2:7836436    | Inverse variance weighted | 2  | -0.084 | 0.105 | 4.241E-01 | 0.961 | cis | SARS-CoV-2 infection |
| 3290_50   | CD109                               | CD109 antigen                                                                 | Q6VHK3 | CD109    | chr6:73695785   | Inverse variance weighted | 7  | -0.009 | 0.011 | 4.243E-01 | 0.961 | cis | SARS-CoV-2 infection |
| 3495_15   | GCP-2                               | C-X-C motif chemokine 6                                                       | P80162 | CXCL6    | chr4:73836640   | Inverse variance weighted | 7  | -0.017 | 0.021 | 4.244E-01 | 0.961 | cis | SARS-CoV-2 infection |
| 8310_6    | U773                                | Zymogen granule protein 16 homolog B                                          | Q96DA0 | ZG16B    | chr16:2830253   | Wald ratio                | 1  | -0.025 | 0.031 | 4.247E-01 | 0.961 | cis | SARS-CoV-2 infection |
| 9863_1    | Tropomyosin 4                       | Tropomyosin alpha-4 chain                                                     | P67936 | TPM4     | chr19:16067021  | Wald ratio                | 1  | 0.054  | 0.068 | 4.247E-01 | 0.961 | cis | SARS-CoV-2 infection |
| 10737_96  | Serpin B1                           | Leukocyte elastase inhibitor                                                  | P30740 | SERPINF1 | chr6:2841959    | Wald ratio                | 1  | 0.060  | 0.075 | 4.256E-01 | 0.961 | cis | SARS-CoV-2 infection |
| 9264_11   | CATO                                | Cathepsin O                                                                   | P43234 | CTSO     | chr4:155953912  | Inverse variance weighted | 2  | 0.025  | 0.032 | 4.258E-01 | 0.961 | cis | SARS-CoV-2 infection |
| 5638_23   | GT251                               | Procollagen galactosyltransferase 1                                           | Q8NBJ5 | COLGALT1 | chr19:17555649  | Inverse variance weighted | 3  | 0.026  | 0.033 | 4.259E-01 | 0.961 | cis | SARS-CoV-2 infection |
| 3327_27   | NET4                                | Netrin-4                                                                      | Q9HB63 | NTN4     | chr12:95791189  | Inverse variance weighted | 3  | 0.017  | 0.021 | 4.264E-01 | 0.961 | cis | SARS-CoV-2 infection |
| 4706_17   | 41                                  | Protein 4.1                                                                   | P11171 | EPB41    | chr1:28887091   | Inverse variance weighted | 2  | -0.068 | 0.086 | 4.266E-01 | 0.961 | cis | SARS-CoV-2 infection |
| 9986_14   | Neuropeptide W                      | Neuropeptide W                                                                | Q8N729 | NPW      | chr16:2009926   | Inverse variance weighted | 3  | -0.020 | 0.025 | 4.276E-01 | 0.961 | cis | SARS-CoV-2 infection |
| 19136_22  | MMSA                                | Methylmalonate-semialdehyde dehydrogenase [acylating], mitochondrial          | Q02252 | ALDH6A1  | chr14:74084492  | Inverse variance weighted | 2  | -0.046 | 0.058 | 4.278E-01 | 0.961 | cis | SARS-CoV-2 infection |
| 11615_16  | DAPP1                               | Dual adapter for phosphotyrosine and 3-phosphotyrosine and 3-phosphoinositide | Q9UN19 | DAPP1    | chr4:99816827   | Wald ratio                | 1  | 0.044  | 0.056 | 4.284E-01 | 0.961 | cis | SARS-CoV-2 infection |
| 8235_48   | SCG1                                | Secretogranin-1                                                               | P05060 | CHGB     | chr20:5911510   | Wald ratio                | 1  | 0.047  | 0.060 | 4.291E-01 | 0.961 | cis | SARS-CoV-2 infection |
| 17383_4   | STAR5                               | StAR-related lipid transfer protein 5                                         | Q9NSY2 | STAR5D   | chr15:81324183  | Inverse variance weighted | 6  | 0.025  | 0.031 | 4.298E-01 | 0.961 | cis | SARS-CoV-2 infection |
| 9981_18   | K1467:C-term                        | Protein FAM234B:C-term                                                        | A2RU67 | FAM234B  | chr12:13044381  | Inverse variance weighted | 5  | -0.021 | 0.026 | 4.300E-01 | 0.961 | cis | SARS-CoV-2 infection |
| 4559_64   | KYNU                                | Kynureninase                                                                  | Q16719 | KYNU     | chr2:142877657  | Inverse variance weighted | 4  | -0.012 | 0.016 | 4.302E-01 | 0.961 | cis | SARS-CoV-2 infection |
| 15368_3   | BMPER                               | BMP-binding endothelial regulator protein                                     | Q8NB99 | BMPER    | chr7:33904308   | Inverse variance weighted | 3  | 0.025  | 0.032 | 4.305E-01 | 0.961 | cis | SARS-CoV-2 infection |
| 16805_5   | PDE5A                               | cGMP-specific 3',5'-cyclic phosphodiesterase                                  | Q76074 | PDE5A    | chr4:119628804  | Wald ratio                | 1  | 0.080  | 0.101 | 4.306E-01 | 0.961 | cis | SARS-CoV-2 infection |
| 5658_64   | coagulation factor XIII B           | Coagulation factor XIII B chain                                               | P05160 | F13B     | chr1:197067260  | Wald ratio                | 1  | -0.038 | 0.049 | 4.315E-01 | 0.961 | cis | SARS-CoV-2 infection |
| 3311_27   | FCG3B                               | Low affinity immunoglobulin gamma Fc region receptor III-B                    | Q75015 | FCGR3B   | chr1:161631963  | Wald ratio                | 1  | -0.086 | 0.109 | 4.326E-01 | 0.961 | cis | SARS-CoV-2 infection |
| 5687_5    | GLU2B                               | Glucosidase 2 subunit beta                                                    | P14314 | PRKCSH   | chr19:11435284  | Wald ratio                | 1  | -0.070 | 0.090 | 4.339E-01 | 0.961 | cis | SARS-CoV-2 infection |
| 15387_44  | Neuropilin-2                        | Neuropilin-2                                                                  | O60462 | NRP2     | chr2:205681990  | Inverse variance weighted | 4  | 0.019  | 0.024 | 4.339E-01 | 0.961 | cis | SARS-CoV-2 infection |
| 11351_233 | NHEJ1                               | Non-homologous end-joining factor 1                                           | Q9H9Q4 | NHEJ1    | chr2:219160869  | Inverse variance weighted | 3  | -0.060 | 0.076 | 4.339E-01 | 0.961 | cis | SARS-CoV-2 infection |
| 17153_46  | KI2I3                               | Killer cell immunoglobulin-like receptor 2DL3                                 | P43628 | KIR2DL3  | chr19:54738513  | Inverse variance weighted | 5  | -0.009 | 0.012 | 4.346E-01 | 0.961 | cis | SARS-CoV-2 infection |
| 2190_55   | Coagulation Factor XI               | Coagulation Factor XI                                                         | P03951 | F11      | chr4:186266189  | Inverse variance weighted | 4  | -0.015 | 0.019 | 4.346E-01 | 0.961 | cis | SARS-CoV-2 infection |
| 18873_8   | CEAM8                               | Carcinoembryonic antigen-related cell adhesion molecule 8                     | P31997 | CEACAM8  | chr19:42595055  | Wald ratio                | 1  | -0.082 | 0.105 | 4.349E-01 | 0.961 | cis | SARS-CoV-2 infection |
| 17384_110 | K6PF                                | ATP-dependent 6-phosphofructokinase, muscle type                              | P08237 | PFKM     | chr12:48105139  | Wald ratio                | 1  | -0.039 | 0.050 | 4.349E-01 | 0.961 | cis | SARS-CoV-2 infection |
| 12703_6   | NEK7                                | Serine/threonine-protein kinase Nek7                                          | Q8TDK7 | NEK7     | chr1:198156994  | Wald ratio                | 1  | 0.038  | 0.048 | 4.352E-01 | 0.961 | cis | SARS-CoV-2 infection |
| 6470_19   | fibulin 1                           | Fibulin-1                                                                     | P23142 | FBLN1    | chr22:45502238  | Inverse variance weighted | 3  | -0.025 | 0.032 | 4.359E-01 | 0.961 | cis | SARS-CoV-2 infection |
| 18876_77  | CHST4                               | Carbohydrate sulfotransferase 4                                               | Q8NCG5 | CHST4    | chr16:71525233  | Wald ratio                | 1  | 0.082  | 0.105 | 4.368E-01 | 0.961 | cis | SARS-CoV-2 infection |
| 9265_10   | GLIP1                               | Glioma pathogenesis-related protein 1                                         | P48060 | GLIPR1   | chr12:75480753  | Wald ratio                | 1  | 0.042  | 0.055 | 4.378E-01 | 0.961 | cis | SARS-CoV-2 infection |
| 5939_42   | TWEAK                               | Tumor necrosis factor ligand superfamily member 12                            | O43508 | TNFSF12  | chr17:7548508   | Inverse variance weighted | 3  | 0.032  | 0.041 | 4.380E-01 | 0.961 | cis | SARS-CoV-2 infection |
| 16913_8   | RNT2                                | Ribonuclease T2                                                               | O00584 | RNASET2  | chr6:166957191  | Inverse variance weighted | 6  | 0.009  | 0.012 | 4.381E-01 | 0.961 | cis | SARS-CoV-2 infection |
| 9294_45   | MFAP2                               | Microfibrillar-associated protein 2                                           | P55001 | MFAP2    | chr1:16980632   | Inverse variance weighted | 2  | 0.096  | 0.124 | 4.384E-01 | 0.961 | cis | SARS-CoV-2 infection |
| 11646_4   | Carbohydrate sulfotransferase 9     | Carbohydrate sulfotransferase 9                                               | Q7L155 | CHST9    | chr18:27185308  | Inverse variance weighted | 4  | -0.021 | 0.027 | 4.387E-01 | 0.961 | cis | SARS-CoV-2 infection |

|           |                          |                                                                          |        |          |                 |                           |   |        |       |           |       |     |                      |
|-----------|--------------------------|--------------------------------------------------------------------------|--------|----------|-----------------|---------------------------|---|--------|-------|-----------|-------|-----|----------------------|
| 17819_30  | FAHD1                    | Acylpyruvase FAHD1, mitochondrial                                        | Q6P587 | FAHD1    | chr16:1826967   | Inverse variance weighted | 3 | -0.038 | 0.049 | 4.389E-01 | 0.961 | cis | SARS-CoV-2 infection |
| 2950_57   | IGFBP-4                  | Insulin-like growth factor-binding protein 4                             | P22692 | IGFBP4   | chr17:40443450  | Wald ratio                | 1 | -0.067 | 0.087 | 4.391E-01 | 0.961 | cis | SARS-CoV-2 infection |
| 5810_25   | Cripto                   | Teratocarcinoma-derived growth factor 1                                  | P13385 | TGDF1    | chr3:46574534   | Inverse variance weighted | 6 | 0.020  | 0.026 | 4.400E-01 | 0.961 | cis | SARS-CoV-2 infection |
| 9015_1    | PRG3                     | Proteoglycan 3                                                           | Q9Y2Y8 | PRG3     | chr11:57381150  | Wald ratio                | 1 | -0.115 | 0.149 | 4.421E-01 | 0.961 | cis | SARS-CoV-2 infection |
| 5980_55   | BOLA3                    | BolA-like protein 3                                                      | Q53533 | BOLA3    | chr2:74147912   | Wald ratio                | 1 | 0.032  | 0.041 | 4.430E-01 | 0.961 | cis | SARS-CoV-2 infection |
| 6404_20   | C1QRF                    | C1q-related factor                                                       | Q75973 | C1QL1    | chr17:44968303  | Inverse variance weighted | 3 | -0.020 | 0.026 | 4.437E-01 | 0.961 | cis | SARS-CoV-2 infection |
| 15343_337 | Kinogen, HMW, Two Chain  | Kinogen, HMW, Two Chain                                                  | P01042 | KNG1     | chr3:186717348  | Inverse variance weighted | 4 | -0.039 | 0.051 | 4.439E-01 | 0.961 | cis | SARS-CoV-2 infection |
| 2590_69   | ROR1                     | Inactive tyrosine-protein kinase transmembrane receptor ROR1             | Q01973 | ROR1     | chr1:63774017   | Inverse variance weighted | 3 | -0.014 | 0.019 | 4.441E-01 | 0.961 | cis | SARS-CoV-2 infection |
| 3220_40   | RET                      | Proto-oncogene tyrosine-protein kinase receptor Ret                      | P07949 | RET      | chr10:43077064  | Inverse variance weighted | 4 | -0.011 | 0.014 | 4.442E-01 | 0.961 | cis | SARS-CoV-2 infection |
| 3332_57   | RGM-C                    | Hemojuvelin                                                              | Q6ZVN8 | HIV      | chr1:146036746  | Wald ratio                | 1 | 0.055  | 0.072 | 4.442E-01 | 0.961 | cis | SARS-CoV-2 infection |
| 2982_82   | Galectin-4               | Galectin-4                                                               | P56470 | LGALS4   | chr19:38812945  | Wald ratio                | 1 | -0.067 | 0.088 | 4.443E-01 | 0.961 | cis | SARS-CoV-2 infection |
| 8297_8    | DJC10                    | Dnal homolog subfamily C member 10                                       | Q8IXB1 | DNAJC10  | chr2:182716255  | Inverse variance weighted | 2 | -0.045 | 0.059 | 4.448E-01 | 0.961 | cis | SARS-CoV-2 infection |
| 11187_11  | CL12A                    | C-type lectin domain family 12 member A                                  | Q5QG29 | CLEC12A  | chr12:9951316   | Inverse variance weighted | 6 | -0.012 | 0.016 | 4.456E-01 | 0.961 | cis | SARS-CoV-2 infection |
| 19437_61  | L-VEGF165                | Isoform L-VEGF165                                                        | P15692 | VEGFA    | chr6:437770184  | Inverse variance weighted | 7 | 0.025  | 0.033 | 4.460E-01 | 0.961 | cis | SARS-CoV-2 infection |
| 16594_44  | FAIM1                    | Fas apoptotic inhibitory molecule 1                                      | Q9NVQ4 | FAIM     | chr3:138608606  | Inverse variance weighted | 7 | 0.012  | 0.015 | 4.461E-01 | 0.961 | cis | SARS-CoV-2 infection |
| 6521_35   | NPTX2                    | Neuronal pentraxin-2                                                     | P47972 | NPTX2    | chr7:98617285   | Inverse variance weighted | 2 | -0.043 | 0.056 | 4.463E-01 | 0.961 | cis | SARS-CoV-2 infection |
| 8005_1    | MXRA7                    | Matrix-remodeling-associated protein 7                                   | R84157 | MXRA7    | chr17:76711004  | Inverse variance weighted | 5 | -0.015 | 0.020 | 4.471E-01 | 0.961 | cis | SARS-CoV-2 infection |
| 19143_38  | NBSR2                    | NADH-cytochrome b5 reductase 2                                           | Q6BCY4 | CYBSR2   | chr11:7677222   | Inverse variance weighted | 6 | -0.026 | 0.035 | 4.481E-01 | 0.961 | cis | SARS-CoV-2 infection |
| 10672_75  | SP-8                     | Pulmonary surfactant-associated protein B                                | P07988 | SFTPB    | chr2:85668741   | Inverse variance weighted | 4 | -0.030 | 0.039 | 4.481E-01 | 0.961 | cis | SARS-CoV-2 infection |
| 10445_20  | ApoM                     | Apolipoprotein M                                                         | O95445 | APOM     | chr6:31652416   | Inverse variance weighted | 2 | 0.021  | 0.028 | 4.484E-01 | 0.961 | cis | SARS-CoV-2 infection |
| 19238_12  | GLNA                     | Glutamine synthetase                                                     | P15104 | GLUL     | chr1:182392206  | Wald ratio                | 1 | -0.073 | 0.097 | 4.498E-01 | 0.961 | cis | SARS-CoV-2 infection |
| 5092_51   | JAG1:ECD                 | Protein jagged-1:Extracellular domain                                    | P78504 | JAG1     | chr20:10673999  | Inverse variance weighted | 2 | -0.045 | 0.060 | 4.501E-01 | 0.961 | cis | SARS-CoV-2 infection |
| 11287_14  | Cytochrome b5            | Cytochrome b5                                                            | P00167 | CYBSA    | chr18:74291973  | Wald ratio                | 1 | -0.087 | 0.116 | 4.507E-01 | 0.961 | cis | SARS-CoV-2 infection |
| 15596_7   | HEX11                    | Protein HEXIM1                                                           | O94992 | HEXIM1   | chr17:45148475  | Wald ratio                | 1 | -0.070 | 0.093 | 4.507E-01 | 0.961 | cis | SARS-CoV-2 infection |
| 9076_25   | PENK                     | Proenkephalin-A                                                          | P01210 | PENK     | chr8:56446671   | Inverse variance weighted | 5 | -0.007 | 0.009 | 4.509E-01 | 0.961 | cis | SARS-CoV-2 infection |
| 15559_5   | ANTR2                    | Anthrax toxin receptor 2                                                 | P58335 | ANTRX2   | chr4:80125454   | Inverse variance weighted | 4 | -0.027 | 0.036 | 4.522E-01 | 0.961 | cis | SARS-CoV-2 infection |
| 5657_28   | SIA4A                    | CMP-N-acetylneuraminase-beta-galactosamide-alpha-2,3-sialyltransferase 1 | Q11201 | ST3GAL1  | chr8:133571940  | Inverse variance weighted | 2 | 0.014  | 0.019 | 4.523E-01 | 0.961 | cis | SARS-CoV-2 infection |
| 4866_59   | TrkB                     | BDNF/NT-3 growth factors receptor                                        | Q16620 | TRTK2    | chr9:84668375   | Wald ratio                | 1 | 0.057  | 0.076 | 4.533E-01 | 0.962 | cis | SARS-CoV-2 infection |
| 18458_4   | PGE52                    | Prostaglandin E synthase 2                                               | Q9H727 | PTGES2   | chr9:128128462  | Wald ratio                | 1 | 0.048  | 0.064 | 4.545E-01 | 0.963 | cis | SARS-CoV-2 infection |
| 3169_70   | IDUA                     | Alpha-L-iduronidase                                                      | P35475 | IDUA     | chr4:986997     | Inverse variance weighted | 7 | 0.018  | 0.024 | 4.558E-01 | 0.963 | cis | SARS-CoV-2 infection |
| 2632_5    | IL-12 Rb1                | Interleukin-12 receptor subunit beta-1                                   | P42701 | IL12RB1  | chr19:18098944  | Wald ratio                | 1 | -0.046 | 0.062 | 4.563E-01 | 0.963 | cis | SARS-CoV-2 infection |
| 13102_1   | FAM3D                    | Protein FAM3D                                                            | Q96BQ1 | FAM3D    | chr3:58666834   | Inverse variance weighted | 4 | 0.011  | 0.015 | 4.565E-01 | 0.963 | cis | SARS-CoV-2 infection |
| 3309_2    | FCG2A                    | Low affinity immunoglobulin gamma Fc region receptor II-a                | P12318 | FCGR2A   | chr1:161505430  | Inverse variance weighted | 4 | -0.018 | 0.024 | 4.570E-01 | 0.963 | cis | SARS-CoV-2 infection |
| 5108_72   | Notch-3                  | Neurogenic locus notch homolog protein 3                                 | Q9UM47 | NOTCH3   | chr19:15200995  | Wald ratio                | 1 | -0.043 | 0.058 | 4.574E-01 | 0.963 | cis | SARS-CoV-2 infection |
| 10620_21  | PSP-94                   | Beta-microseminoprotein                                                  | P08118 | MSMB     | chr10:46048180  | Inverse variance weighted | 5 | -0.004 | 0.006 | 4.590E-01 | 0.963 | cis | SARS-CoV-2 infection |
| 17357_33  | SPCS                     | O-phosphoseryl-tRNA(Sec) selenium transferase                            | Q9HD40 | SEPSCS   | chr4:25160550   | Wald ratio                | 1 | -0.052 | 0.071 | 4.592E-01 | 0.963 | cis | SARS-CoV-2 infection |
| 18864_7   | TRY3                     | Trypsin-3                                                                | P35030 | PRSS3    | chr9:33750679   | Inverse variance weighted | 4 | -0.009 | 0.013 | 4.595E-01 | 0.963 | cis | SARS-CoV-2 infection |
| 3305_6    | DLI4                     | Delta-like protein 4                                                     | Q9NR61 | DLI4     | chr15:40929340  | Wald ratio                | 1 | 0.064  | 0.087 | 4.595E-01 | 0.963 | cis | SARS-CoV-2 infection |
| 4435_66   | ENPP7                    | Ectonucleotide pyrophosphatase/phosphodiesterase family member 7         | Q6UWV6 | ENPP7    | chr17:79730943  | Inverse variance weighted | 9 | 0.010  | 0.013 | 4.603E-01 | 0.964 | cis | SARS-CoV-2 infection |
| 2819_23   | Cadherin-5               | Cadherin-5                                                               | P33151 | CDH5     | chr16:66366622  | Inverse variance weighted | 2 | 0.023  | 0.031 | 4.614E-01 | 0.965 | cis | SARS-CoV-2 infection |
| 5124_69   | sICAM-5                  | Intercellular adhesion molecule 5                                        | Q9UMF0 | ICAM5    | chr19:10289952  | Inverse variance weighted | 4 | -0.044 | 0.060 | 4.639E-01 | 0.966 | cis | SARS-CoV-2 infection |
| 8065_245  | PATE4                    | Prostate and testis expressed protein 4                                  | POC8F1 | PATE4    | chr11:125833316 | Wald ratio                | 1 | -0.029 | 0.039 | 4.640E-01 | 0.966 | cis | SARS-CoV-2 infection |
| 12689_56  | ARCLB                    | Actin-related protein 2/3 complex subunit 1B                             | O15143 | ARPC1B   | chr7:99374249   | Wald ratio                | 1 | 0.040  | 0.055 | 4.645E-01 | 0.966 | cis | SARS-CoV-2 infection |
| 6617_12   | FCRL6                    | Fc receptor-like protein 6                                               | Q6DN72 | FCRL6    | chr1:159800511  | Wald ratio                | 1 | -0.029 | 0.039 | 4.649E-01 | 0.966 | cis | SARS-CoV-2 infection |
| 15444_45  | SCCA2                    | Serpin B4                                                                | P48594 | SERPINF4 | chr18:63644256  | Inverse variance weighted | 3 | 0.030  | 0.041 | 4.651E-01 | 0.966 | cis | SARS-CoV-2 infection |
| 3343_1    | Aminocyclase-1           | Aminocyclase-1                                                           | Q03154 | ACY1     | chr3:51983340   | Wald ratio                | 1 | -0.021 | 0.029 | 4.677E-01 | 0.969 | cis | SARS-CoV-2 infection |
| 2631_50   | IL-10 Rb                 | Interleukin-10 receptor subunit beta                                     | Q08334 | IL10RB   | chr21:33266367  | Wald ratio                | 1 | 0.050  | 0.068 | 4.678E-01 | 0.969 | cis | SARS-CoV-2 infection |
| 5744_12   | CA056                    | Protein MENT                                                             | Q9BU11 | MENT     | chr1:151047751  | Inverse variance weighted | 2 | -0.098 | 0.136 | 4.681E-01 | 0.969 | cis | SARS-CoV-2 infection |
| 8958_51   | CHL1                     | Neural cell adhesion molecule L1-like protein                            | O00533 | CHL1     | chr3:196763     | Inverse variance weighted | 6 | 0.012  | 0.017 | 4.688E-01 | 0.969 | cis | SARS-CoV-2 infection |
| 4874_3    | Angiogenin               | Angiogenin                                                               | P03950 | ANG      | chr14:20684177  | Inverse variance weighted | 5 | 0.022  | 0.030 | 4.705E-01 | 0.969 | cis | SARS-CoV-2 infection |
| 2778_10   | IL-22                    | Interleukin-22                                                           | Q9GZX6 | IL22     | chr12:68253604  | Wald ratio                | 1 | -0.062 | 0.087 | 4.720E-01 | 0.969 | cis | SARS-CoV-2 infection |
| 5648_28   | CTRB2                    | Chymotrypsinogen B2                                                      | Q6GP11 | CTRB2    | chr16:75207161  | Inverse variance weighted | 8 | -0.006 | 0.008 | 4.724E-01 | 0.969 | cis | SARS-CoV-2 infection |
| 8258_22   | UXS1                     | UDP-glucuronic acid decarboxylase 1                                      | Q8NBZ7 | UXS1     | chr2:106194301  | Wald ratio                | 1 | -0.047 | 0.065 | 4.730E-01 | 0.969 | cis | SARS-CoV-2 infection |
| 8309_12   | HYAL1                    | Hyaluronidase-1                                                          | Q12794 | HYAL1    | chr3:50312381   | Inverse variance weighted | 2 | -0.041 | 0.057 | 4.731E-01 | 0.969 | cis | SARS-CoV-2 infection |
| 4989_7    | Fibrinogen g-chain dimer | Fibrinogen gamma chain                                                   | P02679 | FGG      | chr4:154612967  | Wald ratio                | 1 | -0.024 | 0.033 | 4.732E-01 | 0.969 | cis | SARS-CoV-2 infection |
| 3320_49   | IGFBP-7                  | Insulin-like growth factor-binding protein 7                             | Q16270 | IGFBP7   | chr4:57110385   | Inverse variance weighted | 5 | -0.017 | 0.023 | 4.732E-01 | 0.969 | cis | SARS-CoV-2 infection |
| 15511_37  | NPTXR                    | Neuronal pentraxin receptor                                              | O95502 | NPTXR    | chr22:38844028  | Inverse variance weighted | 7 | -0.008 | 0.011 | 4.740E-01 | 0.969 | cis | SARS-CoV-2 infection |
| 15364_101 | Apo C-I                  | Apolipoprotein C-I                                                       | P02654 | APOC1    | chr19:44914247  | Inverse variance weighted | 4 | 0.020  | 0.028 | 4.746E-01 | 0.969 | cis | SARS-CoV-2 infection |
| 15525_294 | ADH1G                    | Alcohol dehydrogenase 1C                                                 | P00326 | ADH1C    | chr4:99352746   | Wald ratio                | 1 | 0.026  | 0.036 | 4.746E-01 | 0.969 | cis | SARS-CoV-2 infection |
| 10940_25  | SRCA                     | Sarcalumenin                                                             | Q8BT4D | SRL      | chr16:4242080   | Wald ratio                | 1 | 0.046  | 0.064 | 4.752E-01 | 0.969 | cis | SARS-CoV-2 infection |
| 16300_4   | TREM2                    | Triggering receptor expressed on myeloid cells 2                         | Q9NZC2 | TREM2    | chr6:41163186   | Inverse variance weighted | 7 | 0.009  | 0.013 | 4.776E-01 | 0.972 | cis | SARS-CoV-2 infection |
| 2654_19   | TNF SR-1                 | Tumor necrosis factor receptor superfamily member 1A                     | P19438 | TNFRSF1A | chr12:6342114   | Wald ratio                | 1 | 0.031  | 0.043 | 4.781E-01 | 0.972 | cis | SARS-CoV-2 infection |
| 6556_5    | ENPP5                    | Ectonucleotide pyrophosphatase/phosphodiesterase family member 5         | Q9UIA9 | ENPP5    | chr6:46170980   | Inverse variance weighted | 7 | -0.006 | 0.008 | 4.785E-01 | 0.972 | cis | SARS-CoV-2 infection |
| 17843_30  | PPCS                     | Phosphopantothenate-cysteine ligase                                      | Q9HAA8 | PPCS     | chr1:42456117   | Inverse variance weighted | 2 | 0.029  | 0.041 | 4.787E-01 | 0.972 | cis | SARS-CoV-2 infection |
| 6986_17   | HS3SB                    | Heparan sulfate glucosamine 3-O-sulfotransferase 3B1                     | Q9Y662 | HS3ST3B1 | chr17:14301081  | Wald ratio                | 1 | -0.071 | 0.100 | 4.798E-01 | 0.972 | cis | SARS-CoV-2 infection |
| 8243_55   | TATI                     | Serine protease inhibitor Kazal-type 1                                   | P00995 | SPINK1   | chr5:147831671  | Inverse variance weighted | 2 | -0.044 | 0.062 | 4.814E-01 | 0.972 | cis | SARS-CoV-2 infection |
| 18381_16  | ALDH-E2                  | Aldehyde dehydrogenase, mitochondrial                                    | P05091 | ALDH2    | chr12:111766887 | Wald ratio                | 1 | -0.045 | 0.063 | 4.818E-01 | 0.972 | cis | SARS-CoV-2 infection |
| 3046_31   | resistin                 | Resistin                                                                 | Q9HD89 | RETN     | chr19:7669049   | Inverse variance weighted | 6 | 0.011  | 0.015 | 4.820E-01 | 0.972 | cis | SARS-CoV-2 infection |
| 8296_117  | KDEL2                    | KDEL motif-containing protein 2                                          | Q724H8 | POGLUT3  | chr11:108498405 | Inverse variance weighted | 6 | 0.009  | 0.013 | 4.820E-01 | 0.972 | cis | SARS-CoV-2 infection |
| 13534_20  | MYOM2                    | Myomesin-2                                                               | P54296 | MYOM2    | chr8:2045046    | Inverse variance weighted | 3 | 0.043  | 0.061 | 4.824E-01 | 0.972 | cis | SARS-CoV-2 infection |
| 3516_60   | SDF-1                    | Stromal cell-derived factor 1                                            | P48061 | CXCL12   | chr10:44386493  | Inverse variance weighted | 2 | 0.022  | 0.032 | 4.835E-01 | 0.972 | cis | SARS-CoV-2 infection |
| 4908_6    | Endoglin                 | Endoglin                                                                 | P17813 | ENG      | chr5:127854658  | Inverse variance weighted | 3 | 0.014  | 0.021 | 4.841E-01 | 0.972 | cis | SARS-CoV-2 infection |
| 16914_104 | sCD14                    | Monocyte differentiation antigen CD14, soluble                           | P08571 | CD14     | chr5:140633700  | Inverse variance weighted | 4 | -0.030 | 0.042 | 4.852E-01 | 0.972 | cis | SARS-CoV-2 infection |
| 10080_9   | EI2BA                    | Translation initiation factor eIF-2B subunit alpha                       | Q14232 | EIF2B1   | chr12:123633766 | Wald ratio                | 1 | 0.063  | 0.090 | 4.856E-01 | 0.972 | cis | SARS-CoV-2 infection |
| 19488_1   | PDCD6                    | Programmed cell death protein 6                                          | O75340 | PDCD6    | chr5:271621     | Inverse variance weighted | 3 | -0.024 | 0.034 | 4.858E-01 | 0.972 | cis | SARS-CoV-2 infection |
| 5708_1    | LEAP2                    | Liver-expressed antimicrobial peptide 2                                  | Q96961 | LEAP2    | chr5:132873444  | Inverse variance weighted | 5 | 0.010  | 0.015 | 4.861E-01 | 0.972 | cis | SARS-CoV-2 infection |
| 4374_45   | MIC-1                    | Growth/differentiation factor 15                                         | Q99988 | GDF15    | chr19:18374731  | Inverse variance weighted | 7 | 0.009  | 0.012 | 4.862E-01 | 0.972 | cis | SARS-CoV-2 infection |
| 9234_8    | TWSG1                    | Twisted gastrulation protein homolog 1                                   | Q9GZX9 | TWSG1    | chr18:9334767   | Inverse variance weighted | 3 | 0.026  | 0.038 | 4.875E-01 | 0.973 | cis | SARS-CoV-2 infection |

|           |                                            |                                                                                                   |        |          |                 |                           |   |        |       |           |       |     |                      |
|-----------|--------------------------------------------|---------------------------------------------------------------------------------------------------|--------|----------|-----------------|---------------------------|---|--------|-------|-----------|-------|-----|----------------------|
| 3820_68   | MAPK2                                      | MAP kinase-activated protein kinase 2                                                             | P49137 | MAPKAPK2 | chr1:206684905  | Wald ratio                | 1 | -0.019 | 0.028 | 4.909E-01 | 0.978 | cis | SARS-CoV-2 infection |
| 18315_38  | RTPA                                       | Receptor-transporting protein 4                                                                   | Q960X8 | RTPA     | chr3:187368385  | Inverse variance weighted | 3 | -0.010 | 0.014 | 4.913E-01 | 0.978 | cis | SARS-CoV-2 infection |
| 7161_25   | G6PE                                       | GDH/6PLG endoplasmic bifunctional protein                                                         | O95479 | H6PD     | chr1:9234774    | Inverse variance weighted | 9 | -0.008 | 0.012 | 4.933E-01 | 0.978 | cis | SARS-CoV-2 infection |
| 15376_134 | CATE                                       | Cathepsin E                                                                                       | P14091 | CTSE     | chr1:206023909  | Inverse variance weighted | 4 | -0.011 | 0.016 | 4.933E-01 | 0.978 | cis | SARS-CoV-2 infection |
| 12855_16  | CTO32                                      | Cas scaffolding protein family member 4                                                           | Q9NQ75 | CASS4    | chr20:56412112  | Wald ratio                | 1 | -0.061 | 0.089 | 4.940E-01 | 0.978 | cis | SARS-CoV-2 infection |
| 8794_13   | DPEP1                                      | Dipeptidase 1                                                                                     | P16444 | DPEP1    | chr16:89613308  | Inverse variance weighted | 6 | 0.008  | 0.011 | 4.948E-01 | 0.978 | cis | SARS-CoV-2 infection |
| 5018_68   | Peroxiredoxin-6                            | Peroxiredoxin-6                                                                                   | P30041 | PRDX6    | chr1:173477330  | Wald ratio                | 1 | -0.054 | 0.080 | 4.955E-01 | 0.978 | cis | SARS-CoV-2 infection |
| 19558_10  | LRP4                                       | Low-density lipoprotein receptor-related protein 4                                                | OT5096 | LRP4     | chr11:46918642  | Inverse variance weighted | 6 | -0.016 | 0.024 | 4.963E-01 | 0.978 | cis | SARS-CoV-2 infection |
| 15522_2   | GAPR1                                      | Golgi-associated plant pathogenesis-related protein 1                                             | Q9HA46 | GLPR2    | chr9:36136536   | Inverse variance weighted | 2 | 0.012  | 0.018 | 4.966E-01 | 0.978 | cis | SARS-CoV-2 infection |
| 12534_10  | CACO2                                      | Calcium-binding and coiled-coil domain-containing protein 2                                       | Q13137 | CALCOCO2 | chr17:48831018  | Wald ratio                | 1 | -0.037 | 0.055 | 4.971E-01 | 0.978 | cis | SARS-CoV-2 infection |
| 3391_10   | PK3CG                                      | Phosphatidylinositol 4,5-bisphosphate 3-kinase catalytic subunit gamma isoform                    | P48736 | PIK3CG   | chr7:106865278  | Wald ratio                | 1 | 0.064  | 0.095 | 4.976E-01 | 0.978 | cis | SARS-CoV-2 infection |
| 12408_333 | R822A                                      | Ras-related protein Rab-22A                                                                       | Q9UL26 | RAB22A   | chr20:58309715  | Wald ratio                | 1 | 0.054  | 0.079 | 4.991E-01 | 0.978 | cis | SARS-CoV-2 infection |
| 9886_28   | XRCC4                                      | DNA repair protein XRCC4                                                                          | Q13426 | XRCC4    | chr5:83077498   | Wald ratio                | 1 | 0.031  | 0.047 | 5.007E-01 | 0.978 | cis | SARS-CoV-2 infection |
| 4911_49   | Glutathione S-transferase Pi               | Glutathione S-transferase P                                                                       | P09211 | GSTP1    | chr11:67583742  | Inverse variance weighted | 2 | -0.050 | 0.075 | 5.009E-01 | 0.978 | cis | SARS-CoV-2 infection |
| 17672_184 | Gastric intrinsic factor                   | Gastric intrinsic factor                                                                          | T27352 | CLBIF    | chr11:59845499  | Inverse variance weighted | 2 | 0.045  | 0.067 | 5.011E-01 | 0.978 | cis | SARS-CoV-2 infection |
| 15363_32  | Apo A-V                                    | Apolipoprotein A-V                                                                                | Q6Q788 | APOA5    | chr11:116792420 | Inverse variance weighted | 8 | -0.008 | 0.012 | 5.027E-01 | 0.978 | cis | SARS-CoV-2 infection |
| 19614_8   | Holo-TC I                                  | Transcobalamin-1                                                                                  | P20061 | TCN1     | chr11:59866489  | Inverse variance weighted | 5 | 0.009  | 0.013 | 5.051E-01 | 0.978 | cis | SARS-CoV-2 infection |
| 4145_58   | Neurotrophin-3                             | Neurotrophin-3                                                                                    | P20783 | NTF3     | chr12:5432108   | Inverse variance weighted | 2 | -0.036 | 0.054 | 5.055E-01 | 0.978 | cis | SARS-CoV-2 infection |
| 10561_5   | PGRP-I-alpha                               | Peptidoglycan recognition protein 3                                                               | Q96LB9 | PGLYRP3  | chr1:153312952  | Wald ratio                | 1 | 0.064  | 0.097 | 5.072E-01 | 0.978 | cis | SARS-CoV-2 infection |
| 5581_28   | FGL1                                       | Fibrinogen-like protein 1                                                                         | Q08830 | FGL1     | chr8:17910365   | Inverse variance weighted | 7 | 0.008  | 0.012 | 5.078E-01 | 0.978 | cis | SARS-CoV-2 infection |
| 7110_2    | DJB11                                      | DnaJ homolog subfamily B member 11                                                                | Q9UB54 | DNAJB11  | chr3:186567403  | Inverse variance weighted | 2 | 0.032  | 0.048 | 5.081E-01 | 0.978 | cis | SARS-CoV-2 infection |
| 10042_8   | SGK3                                       | Serine/threonine-protein kinase Sgk3                                                              | Q96BR1 | SGK3     | chr8:66712734   | Wald ratio                | 1 | -0.061 | 0.093 | 5.084E-01 | 0.978 | cis | SARS-CoV-2 infection |
| 5610_32   | CJ038                                      | Protein FAM171A1                                                                                  | Q5VUB5 | FAM171A1 | chr10:15371289  | Inverse variance weighted | 2 | -0.044 | 0.067 | 5.100E-01 | 0.978 | cis | SARS-CoV-2 infection |
| 19289_29  | DCUP                                       | Uroporphyrinogen decarboxylase                                                                    | P06132 | UROD     | chr1:45010950   | Inverse variance weighted | 3 | 0.012  | 0.019 | 5.104E-01 | 0.978 | cis | SARS-CoV-2 infection |
| 6930_95   | SIAP8                                      | Alpha-2,8-sialyltransferase 8F                                                                    | P61647 | ST8SIA6  | chr10:17454595  | Wald ratio                | 1 | -0.064 | 0.098 | 5.113E-01 | 0.978 | cis | SARS-CoV-2 infection |
| 4240_31   | M2-PK                                      | Pyruvate kinase PKM                                                                               | P14618 | PKM      | chr15:72231819  | Wald ratio                | 1 | 0.050  | 0.076 | 5.119E-01 | 0.978 | cis | SARS-CoV-2 infection |
| 18307_71  | PPase 2                                    | Inorganic pyrophosphatase 2, mitochondrial                                                        | Q9H2U2 | PPA2     | chr4:105474067  | Wald ratio                | 1 | -0.036 | 0.055 | 5.120E-01 | 0.978 | cis | SARS-CoV-2 infection |
| 5091_28   | ILT-4                                      | Leukocyte immunoglobulin-like receptor subfamily B member 2                                       | Q8N423 | LILRB2   | chr19:54281184  | Inverse variance weighted | 4 | -0.026 | 0.040 | 5.131E-01 | 0.978 | cis | SARS-CoV-2 infection |
| 15576_158 | ECP                                        | Eosinophil cationic protein                                                                       | P12724 | RNASE3   | chr14:20891385  | Inverse variance weighted | 5 | -0.009 | 0.013 | 5.137E-01 | 0.978 | cis | SARS-CoV-2 infection |
| 11347_9   | Transaldolase                              | Transaldolase                                                                                     | P37837 | TALD01   | chr11:747415    | Inverse variance weighted | 2 | -0.032 | 0.049 | 5.141E-01 | 0.978 | cis | SARS-CoV-2 infection |
| 18918_86  | PDE4A                                      | cAMP-specific 3',5'-cyclic phosphodiesterase 4A                                                   | P27815 | PDE4A    | chr19:10416773  | Inverse variance weighted | 4 | 0.020  | 0.030 | 5.161E-01 | 0.978 | cis | SARS-CoV-2 infection |
| 16561_9   | Alpha-18-glycoprotein                      | Alpha-18-glycoprotein                                                                             | P04217 | A1BG     | chr19:58353492  | Inverse variance weighted | 4 | -0.009 | 0.014 | 5.170E-01 | 0.978 | cis | SARS-CoV-2 infection |
| 5703_26   | NOE1                                       | Noelin                                                                                            | Q99784 | OLFM1    | chr9:135075422  | Inverse variance weighted | 2 | -0.027 | 0.042 | 5.172E-01 | 0.978 | cis | SARS-CoV-2 infection |
| 5676_54   | ASIP                                       | Agouti-signaling protein                                                                          | P42127 | ASIP     | chr20:34194569  | Wald ratio                | 1 | 0.009  | 0.013 | 5.179E-01 | 0.978 | cis | SARS-CoV-2 infection |
| 7251_64   | CIQT3                                      | Complement C1q tumor necrosis factor-related protein 3                                            | Q9BXJ4 | CIQTNF3  | chr5:34043213   | Inverse variance weighted | 2 | -0.023 | 0.035 | 5.181E-01 | 0.978 | cis | SARS-CoV-2 infection |
| 15333_11  | SDF2                                       | Stromal cell-derived factor 2                                                                     | Q99470 | SDF2     | chr17:28662189  | Wald ratio                | 1 | 0.040  | 0.062 | 5.182E-01 | 0.978 | cis | SARS-CoV-2 infection |
| 5349_69   | DLL1                                       | Delta-like protein 1                                                                              | O00548 | DLL1     | chr6:170306565  | Inverse variance weighted | 2 | 0.055  | 0.085 | 5.183E-01 | 0.978 | cis | SARS-CoV-2 infection |
| 11265_8   | Retinal dehydrogenase 1                    | Retinal dehydrogenase 1                                                                           | P00352 | ALDH1A1  | chr9:73080442   | Wald ratio                | 1 | 0.033  | 0.051 | 5.185E-01 | 0.978 | cis | SARS-CoV-2 infection |
| 8795_48   | TR-ECD                                     | Transferrin receptor protein 1:Extracellular domain                                               | P02786 | TRFC     | chr3:196082153  | Wald ratio                | 1 | 0.042  | 0.065 | 5.189E-01 | 0.978 | cis | SARS-CoV-2 infection |
| 5061_27   | B7-H2                                      | ICOS ligand                                                                                       | OT5344 | ICOSLG   | chr21:44241446  | Wald ratio                | 1 | -0.052 | 0.081 | 5.199E-01 | 0.978 | cis | SARS-CoV-2 infection |
| 15636_49  | SORC1                                      | VP510 domain-containing receptor SorCS1                                                           | Q8WY21 | SORCS1   | chr10:107164706 | Wald ratio                | 1 | 0.047  | 0.073 | 5.211E-01 | 0.978 | cis | SARS-CoV-2 infection |
| 5105_2    | Nogo Receptor                              | Reticulon-4 receptor                                                                              | Q9BZ66 | RTN4R    | chr22:20283246  | Inverse variance weighted | 5 | -0.009 | 0.014 | 5.213E-01 | 0.978 | cis | SARS-CoV-2 infection |
| 4188_1    | Aflatoxin B1 aldehyde reductase            | Aflatoxin B1 aldehyde reductase member 2                                                          | O43488 | AKR7A2   | chr1:19312144   | Wald ratio                | 1 | 0.021  | 0.032 | 5.213E-01 | 0.978 | cis | SARS-CoV-2 infection |
| 6433_57   | FA20A                                      | Pseudokinase FAM20A                                                                               | Q96MK3 | FAM20A   | chr17:68601367  | Inverse variance weighted | 3 | -0.017 | 0.026 | 5.215E-01 | 0.978 | cis | SARS-CoV-2 infection |
| 16613_3   | CAD17                                      | Cadherin-17                                                                                       | Q12864 | CDH17    | chr8:94217303   | Inverse variance weighted | 5 | 0.010  | 0.015 | 5.217E-01 | 0.978 | cis | SARS-CoV-2 infection |
| 19251_56  | Platelet proteoglycan                      | Serylglycin                                                                                       | P10124 | SRGN     | chr10:69088103  | Inverse variance weighted | 5 | -0.011 | 0.017 | 5.222E-01 | 0.978 | cis | SARS-CoV-2 infection |
| 17460_51  | Mx1                                        | Interferon-induced GTP-binding protein Mx1                                                        | P20591 | MX1      | chr21:41420020  | Inverse variance weighted | 4 | -0.009 | 0.014 | 5.225E-01 | 0.978 | cis | SARS-CoV-2 infection |
| 7926_13   | SPIT3                                      | Kunitz-type protease inhibitor 3                                                                  | P49223 | SPINT3   | chr20:45515622  | Inverse variance weighted | 4 | 0.027  | 0.042 | 5.227E-01 | 0.978 | cis | SARS-CoV-2 infection |
| 6402_8    | PILRA isoform FDF03-deltaTM                | Paired immunoglobulin-like type 2 receptor alpha isoform FDF03-deltaTM                            | Q9UX11 | PILRA    | chr7:100367530  | Inverse variance weighted | 2 | 0.010  | 0.016 | 5.235E-01 | 0.978 | cis | SARS-CoV-2 infection |
| 9251_28   | MA2B2                                      | Epididymis-specific alpha-mannosidase                                                             | Q9YZE5 | MAN2B2   | chr4:6575189    | Inverse variance weighted | 9 | 0.007  | 0.011 | 5.236E-01 | 0.978 | cis | SARS-CoV-2 infection |
| 6998_106  | HAAH                                       | Aspartyl/asparaginyl beta-hydroxylase                                                             | Q12797 | ASPH     | chr8:61714640   | Inverse variance weighted | 2 | -0.029 | 0.046 | 5.238E-01 | 0.978 | cis | SARS-CoV-2 infection |
| 15560_52  | Apo-TC II                                  | Transcobalamin-2                                                                                  | P20062 | TCN2     | chr22:30607003  | Inverse variance weighted | 4 | 0.007  | 0.011 | 5.240E-01 | 0.978 | cis | SARS-CoV-2 infection |
| 17814_8   | BPNT1                                      | 3'(2'),5'-bisphosphate nucleotidase 1                                                             | O95861 | BPNT1    | chr1:220090462  | Wald ratio                | 1 | 0.054  | 0.085 | 5.242E-01 | 0.978 | cis | SARS-CoV-2 infection |
| 5663_18   | PF4V                                       | Platelet factor 4 variant                                                                         | P10720 | PF4V1    | chr4:73853296   | Inverse variance weighted | 2 | 0.075  | 0.118 | 5.251E-01 | 0.978 | cis | SARS-CoV-2 infection |
| 2948_58   | Growth hormone receptor                    | Growth hormone receptor                                                                           | P10912 | GHR      | chr5:42423439   | Inverse variance weighted | 4 | 0.014  | 0.022 | 5.261E-01 | 0.978 | cis | SARS-CoV-2 infection |
| 9883_29   | Glyoxalase I                               | Lactoylglutathione lyase                                                                          | Q04760 | GLO1     | chr6:38703145   | Inverse variance weighted | 3 | -0.026 | 0.040 | 5.263E-01 | 0.978 | cis | SARS-CoV-2 infection |
| 10708_3   | GON2                                       | Progonadoliberin-2                                                                                | O43555 | GNRH2    | chr20:3043622   | Wald ratio                | 1 | -0.029 | 0.047 | 5.266E-01 | 0.978 | cis | SARS-CoV-2 infection |
| 14134_49  | AMG02                                      | Amphoterin-induced protein 2                                                                      | Q86512 | AMIGO2   | chr12:47079959  | Inverse variance weighted | 3 | 0.024  | 0.039 | 5.273E-01 | 0.978 | cis | SARS-CoV-2 infection |
| 5346_24   | CPNE1: C2, 1 and 2                         | Copine-1:Ca2+-dependent membrane-targeting module domains 1 and 2                                 | O99829 | CPNE1    | chr20:35664956  | Inverse variance weighted | 9 | 0.005  | 0.009 | 5.275E-01 | 0.978 | cis | SARS-CoV-2 infection |
| 3518_54   | TAFI                                       | Carboxypeptidase B2                                                                               | Q96IY4 | CPB2     | chr13:46105033  | Inverse variance weighted | 5 | -0.008 | 0.012 | 5.283E-01 | 0.978 | cis | SARS-CoV-2 infection |
| 18899_82  | HDGR3                                      | Hepatoma-derived growth factor-related protein 3                                                  | O9Y3E1 | HDFGL3   | chr15:83207823  | Wald ratio                | 1 | -0.031 | 0.050 | 5.290E-01 | 0.978 | cis | SARS-CoV-2 infection |
| 8100_15   | ADM2                                       | ADM2                                                                                              | Q7Z4H4 | ADM2     | chr22:50481543  | Wald ratio                | 1 | 0.055  | 0.088 | 5.301E-01 | 0.978 | cis | SARS-CoV-2 infection |
| 11196_31  | Collagen alpha-3(VI):BPTI/Kunitz inhibitor | Collagen alpha-3(VI) chain:Bovine pancreatic trypsin inhibitor/Kunitz inhibitor domain, isoform 1 | P12111 | COL6A3   | chr2:237414328  | Wald ratio                | 1 | -0.045 | 0.072 | 5.315E-01 | 0.978 | cis | SARS-CoV-2 infection |
| 13124_20  | ISLR2                                      | Immunoglobulin superfamily containing leucine-rich repeat protein 2                               | Q6UXK2 | ISLR2    | chr15:74100311  | Inverse variance weighted | 4 | -0.028 | 0.045 | 5.326E-01 | 0.978 | cis | SARS-CoV-2 infection |
| 8476_11   | CgA                                        | Chromogranin-A                                                                                    | P10645 | CHGA     | chr14:92923150  | Inverse variance weighted | 4 | 0.012  | 0.018 | 5.327E-01 | 0.978 | cis | SARS-CoV-2 infection |
| 15521_4   | Alcadein alpha-1                           | Calsyntenin-1                                                                                     | O94985 | CLSTN1   | chr1:19823984   | Inverse variance weighted | 6 | 0.005  | 0.008 | 5.335E-01 | 0.978 | cis | SARS-CoV-2 infection |
| 12334_25  | cSHMT                                      | Serine hydroxymethyltransferase, cytosolic                                                        | P34896 | SHMT1    | chr17:18363563  | Inverse variance weighted | 6 | 0.008  | 0.014 | 5.347E-01 | 0.978 | cis | SARS-CoV-2 infection |
| 12556_7   | UBE2C                                      | Ubiquitin-conjugating enzyme E2 C                                                                 | O00762 | UBE2C    | chr20:455812576 | Inverse variance weighted | 2 | 0.027  | 0.044 | 5.355E-01 | 0.978 | cis | SARS-CoV-2 infection |
| 6367_66   | fibromodulin                               | fibromodulin                                                                                      | Q06828 | FMOD     | chr1:203351758  | Inverse variance weighted | 2 | 0.019  | 0.030 | 5.368E-01 | 0.978 | cis | SARS-CoV-2 infection |
| 9816_37   | ISOC1                                      | Isochorismatase domain-containing protein 1                                                       | Q96CN7 | ISOC1    | chr5:129094749  | Inverse variance weighted | 3 | 0.021  | 0.034 | 5.373E-01 | 0.978 | cis | SARS-CoV-2 infection |
| 10908_2   | GLT13                                      | Polypeptide N-acetylgalactosaminyltransferase 13                                                  | Q8IU08 | GAUNT13  | chr2:153871922  | Wald ratio                | 1 | -0.052 | 0.084 | 5.373E-01 | 0.978 | cis | SARS-CoV-2 infection |
| 4984_83   | Esterase D                                 | S-formylglutathione hydrolase                                                                     | P10768 | ESD      | chr13:46797420  | Inverse variance weighted | 3 | 0.013  | 0.020 | 5.373E-01 | 0.978 | cis | SARS-CoV-2 infection |
| 7905_30   | HPT                                        | Haptoglobin isoform 2                                                                             | P00738 | HP       | chr16:72054505  | Wald ratio                | 1 | -0.012 | 0.020 | 5.382E-01 | 0.978 | cis | SARS-CoV-2 infection |
| 17836_17  | S100A16                                    | Protein S100-A16                                                                                  | Q96FQ6 | S100A16  | chr1:153613145  | Wald ratio                | 1 | -0.042 | 0.068 | 5.385E-01 | 0.978 | cis | SARS-CoV-2 infection |
| 5090_49   | ILT-2                                      | Leukocyte immunoglobulin-like receptor subfamily B member 1                                       | Q8NH16 | LILRB1   | chr19:54617158  | Inverse variance weighted | 7 | -0.009 | 0.015 | 5.393E-01 | 0.978 | cis | SARS-CoV-2 infection |
| 4249_64   | NDP kinase B                               | Nucleoside diphosphate kinase B                                                                   | T22392 | NME2     | chr17:51165435  | Wald ratio                | 1 | 0.020  | 0.033 | 5.415E-01 | 0.978 | cis | SARS-CoV-2 infection |
| 12731_12  | PKHA7                                      | Pleckstrin homology domain-containing family A member 7                                           | Q6IQ23 | PLEKHA7  | chr11:17014415  | Inverse variance weighted | 4 | -0.008 | 0.013 | 5.421E-01 | 0.978 | cis | SARS-CoV-2 infection |
| 12450_42  | PMVK                                       | Phosphomevalonate kinase                                                                          | Q15126 | PMVK     | chr7:154936719  | Inverse variance weighted | 2 | 0.094  | 0.154 | 5.422E-01 | 0.978 | cis | SARS-CoV-2 infection |

|           |                                 |                                                                                 |        |          |                 |                           |    |        |       |           |       |     |                      |
|-----------|---------------------------------|---------------------------------------------------------------------------------|--------|----------|-----------------|---------------------------|----|--------|-------|-----------|-------|-----|----------------------|
| 17758_79  | DCXR                            | L-xylulose reductase                                                            | Q724W1 | DCXR     | chr17:82037709  | Inverse variance weighted | 2  | -0.040 | 0.066 | 5.425E-01 | 0.978 | cis | SARS-CoV-2 infection |
| 5131_15   | TAJ                             | Tumor necrosis factor receptor superfamily member 19                            | Q9N568 | TNFRSF19 | chr13:23570370  | Wald ratio                | 1  | -0.029 | 0.048 | 5.426E-01 | 0.978 | cis | SARS-CoV-2 infection |
| 14006_36  | GNMT                            | Glycine N-methyltransferase                                                     | Q14749 | GNMT     | chr6:42960754   | Inverse variance weighted | 2  | -0.023 | 0.038 | 5.431E-01 | 0.978 | cis | SARS-CoV-2 infection |
| 8923_94   | GLTL1                           | Polypeptide N-acetylgalactosaminyltransferase 16                                | Q8N428 | GALNT16  | chr14:69259277  | Inverse variance weighted | 4  | -0.019 | 0.032 | 5.443E-01 | 0.978 | cis | SARS-CoV-2 infection |
| 5601_2    | PGRP-L                          | N-acetylmuramoyl-L-alanine amidase                                              | Q96P05 | PLGLYR2  | chr19:15498956  | Inverse variance weighted | 5  | 0.011  | 0.018 | 5.444E-01 | 0.978 | cis | SARS-CoV-2 infection |
| 8974_172  | COFA1                           | Collagen alpha-1(XV) chain                                                      | P39059 | COL15A1  | chr9:98943179   | Inverse variance weighted | 4  | 0.012  | 0.020 | 5.449E-01 | 0.978 | cis | SARS-CoV-2 infection |
| 16610_13  | LRP10                           | Low-density lipoprotein receptor-related protein 10                             | Q7Z4F1 | LRP10    | chr14:22871740  | Inverse variance weighted | 3  | 0.047  | 0.077 | 5.453E-01 | 0.978 | cis | SARS-CoV-2 infection |
| 9482_110  | NUDT9                           | ADP-ribose pyrophosphatase, mitochondrial                                       | Q9BW91 | NUDT9    | chr4:87422573   | Wald ratio                | 1  | -0.048 | 0.080 | 5.460E-01 | 0.978 | cis | SARS-CoV-2 infection |
| 17677_47  | BY55                            | CD160 antigen                                                                   | O95971 | CD160    | chr1:145719471  | Wald ratio                | 1  | -0.029 | 0.048 | 5.462E-01 | 0.978 | cis | SARS-CoV-2 infection |
| 9005_16   | PLXA1                           | Plexin-A1                                                                       | Q9UIW2 | PLXNA1   | chr3:126982693  | Inverse variance weighted | 3  | 0.012  | 0.019 | 5.470E-01 | 0.978 | cis | SARS-CoV-2 infection |
| 16074_12  | GRB2-related adapter protein 2  | GRB2-related adapter protein 2                                                  | O75791 | GRAP2    | chr22:39901084  | Wald ratio                | 1  | 0.088  | 0.147 | 5.477E-01 | 0.978 | cis | SARS-CoV-2 infection |
| 2212_69   | TPA                             | Tissue-type plasminogen activator                                               | P00750 | PLAT     | chr8:42207709   | Inverse variance weighted | 4  | -0.018 | 0.030 | 5.479E-01 | 0.978 | cis | SARS-CoV-2 infection |
| 9906_21   | TICN3                           | Testican-3                                                                      | Q9BQ16 | SPOCK3   | chr4:167234796  | Inverse variance weighted | 11 | -0.006 | 0.011 | 5.480E-01 | 0.978 | cis | SARS-CoV-2 infection |
| 4332_6    | CLC1B                           | C-type lectin domain family 1 member B                                          | Q9P126 | CLEC1B   | chr12:10013424  | Wald ratio                | 1  | -0.041 | 0.068 | 5.483E-01 | 0.978 | cis | SARS-CoV-2 infection |
| 9525_1    | PTK7                            | Inactive tyrosine-protein kinase 7                                              | Q13308 | PTK7     | chr6:43076307   | Inverse variance weighted | 2  | -0.041 | 0.068 | 5.490E-01 | 0.978 | cis | SARS-CoV-2 infection |
| 13624_17  | NADK                            | NAD kinase                                                                      | O95544 | NADK     | chr1:1780457    | Inverse variance weighted | 2  | -0.023 | 0.038 | 5.495E-01 | 0.978 | cis | SARS-CoV-2 infection |
| 16892_23  | ENPP2                           | Ectonucleotide pyrophosphatase/phosphodiesterase family member 2                | Q13822 | ENPP2    | chr8:119673453  | Inverse variance weighted | 4  | -0.020 | 0.034 | 5.500E-01 | 0.978 | cis | SARS-CoV-2 infection |
| 2879_9    | a1-Antichymotrypsin             | Alpha-1-antichymotrypsin                                                        | P01011 | SERPINA3 | chr14:94612384  | Wald ratio                | 1  | 0.065  | 0.109 | 5.504E-01 | 0.978 | cis | SARS-CoV-2 infection |
| 15584_9   | FHR2                            | Complement factor H-related protein 2                                           | P36980 | CFHR2    | chr1:196943738  | Inverse variance weighted | 4  | -0.008 | 0.014 | 5.506E-01 | 0.978 | cis | SARS-CoV-2 infection |
| 16055_3   | complement factor H-related 5   | Complement factor H-related protein 5                                           | Q9BXR6 | CFHR5    | chr1:196975010  | Inverse variance weighted | 5  | -0.009 | 0.015 | 5.518E-01 | 0.978 | cis | SARS-CoV-2 infection |
| 15300_66  | CC134                           | Coiled-coil domain-containing protein 134                                       | Q9HE64 | CCDC134  | chr22:41800679  | Inverse variance weighted | 2  | 0.055  | 0.093 | 5.521E-01 | 0.978 | cis | SARS-CoV-2 infection |
| 6544_33   | NELL1                           | Protein kinase C-binding protein NELL1                                          | Q92832 | NELL1    | chr11:20669551  | Inverse variance weighted | 8  | 0.007  | 0.012 | 5.524E-01 | 0.978 | cis | SARS-CoV-2 infection |
| 5483_1    | RGMA                            | Repulsive guidance molecule A                                                   | Q96886 | RGMA     | chr15:93089211  | Inverse variance weighted | 4  | -0.015 | 0.025 | 5.527E-01 | 0.978 | cis | SARS-CoV-2 infection |
| 18881_7   | CD97                            | CD97 antigen                                                                    | P48960 | ADGRE5   | chr19:14380501  | Inverse variance weighted | 4  | -0.022 | 0.036 | 5.531E-01 | 0.978 | cis | SARS-CoV-2 infection |
| 8458_111  | a-Synuclein                     | Alpha-synuclein                                                                 | P37840 | SNCA     | chr4:89838315   | Wald ratio                | 1  | -0.061 | 0.103 | 5.540E-01 | 0.978 | cis | SARS-CoV-2 infection |
| 8028_22   | SPINK5                          | Serine protease inhibitor Kazal-type 5                                          | Q9NQ38 | SPINK5   | chr5:148025683  | Wald ratio                | 1  | -0.021 | 0.036 | 5.543E-01 | 0.978 | cis | SARS-CoV-2 infection |
| 4961_17   | annexin II                      | Annexin A2                                                                      | P07355 | ANXA2    | chr15:60402883  | Inverse variance weighted | 2  | 0.036  | 0.061 | 5.545E-01 | 0.978 | cis | SARS-CoV-2 infection |
| 6425_87   | MMP19                           | Matrix metalloproteinase-19                                                     | Q99542 | MMP19    | chr12:55842966  | Inverse variance weighted | 3  | 0.028  | 0.048 | 5.555E-01 | 0.978 | cis | SARS-CoV-2 infection |
| 17515_6   | STCH                            | Heat shock 70 kDa protein 13                                                    | P48723 | HSPA13   | chr21:14383484  | Wald ratio                | 1  | 0.029  | 0.049 | 5.565E-01 | 0.978 | cis | SARS-CoV-2 infection |
| 6520_87   | MGP                             | Matrix Gla protein                                                              | P08493 | MGP      | chr12:14885857  | Wald ratio                | 1  | 0.045  | 0.076 | 5.566E-01 | 0.978 | cis | SARS-CoV-2 infection |
| 11616_9   | HSF1                            | Heat shock factor protein 1                                                     | Q00613 | HSF1     | chr8:144291591  | Wald ratio                | 1  | 0.045  | 0.076 | 5.571E-01 | 0.978 | cis | SARS-CoV-2 infection |
| 9748_31   | GSTM3-3                         | Glutathione S-transferase Mu 3                                                  | P12266 | GSTM3    | chr1:109741038  | Inverse variance weighted | 5  | -0.010 | 0.017 | 5.577E-01 | 0.978 | cis | SARS-CoV-2 infection |
| 16616_137 | ENO8                            | Beta-enolase                                                                    | P13929 | ENO3     | chr17:4948092   | Inverse variance weighted | 2  | 0.014  | 0.024 | 5.581E-01 | 0.978 | cis | SARS-CoV-2 infection |
| 2658_27   | TrkC                            | NT-3 growth factor receptor                                                     | Q16288 | NTN3     | chr15:88256791  | Inverse variance weighted | 5  | -0.014 | 0.024 | 5.585E-01 | 0.978 | cis | SARS-CoV-2 infection |
| 3796_79   | ANGLA                           | Angiotensinogen-related protein 4                                               | Q9BY76 | ANGPTL4  | chr19:8363289   | Wald ratio                | 1  | -0.030 | 0.051 | 5.595E-01 | 0.978 | cis | SARS-CoV-2 infection |
| 3852_19   | HSP 40                          | DnaJ homolog subfamily B member 1                                               | P25685 | DNAJB1   | chr19:14560391  | Wald ratio                | 1  | -0.054 | 0.093 | 5.614E-01 | 0.978 | cis | SARS-CoV-2 infection |
| 12831_21  | TESC                            | Calcineurin B homologous protein 3                                              | Q96852 | TESC     | chr12:117099479 | Inverse variance weighted | 6  | 0.010  | 0.018 | 5.621E-01 | 0.978 | cis | SARS-CoV-2 infection |
| 11278_4   | COL11A2                         | Collagen alpha-2(XI) chain                                                      | P13942 | COL11A2  | chr6:33192499   | Inverse variance weighted | 4  | 0.009  | 0.016 | 5.634E-01 | 0.978 | cis | SARS-CoV-2 infection |
| 6627_25   | LIPI1                           | Inactive pancreatic lipase-related protein 1                                    | P54315 | PNLIPRP1 | chr10:116590385 | Inverse variance weighted | 2  | -0.018 | 0.031 | 5.635E-01 | 0.978 | cis | SARS-CoV-2 infection |
| 3045_72   | PTN                             | Pleiotrophin                                                                    | P21246 | PTN      | chr7:137343774  | Inverse variance weighted | 3  | -0.015 | 0.026 | 5.638E-01 | 0.978 | cis | SARS-CoV-2 infection |
| 13622_16  | ZA5A                            | Serine/threonine-protein phosphatase 2A 56 kDa regulatory subunit alpha isoform | Q15172 | PPP2R5A  | chr1:212285410  | Wald ratio                | 1  | 0.058  | 0.100 | 5.651E-01 | 0.978 | cis | SARS-CoV-2 infection |
| 5355_69   | LIGHT                           | Tumor necrosis factor ligand superfamily member 14                              | O43557 | TNFSF14  | chr19:6670588   | Wald ratio                | 1  | -0.028 | 0.048 | 5.664E-01 | 0.978 | cis | SARS-CoV-2 infection |
| 18174_79  | PDC6i                           | Programmed cell death 6-interacting protein                                     | Q8WUM4 | PDC6IP   | chr3:33798571   | Wald ratio                | 1  | -0.026 | 0.046 | 5.678E-01 | 0.978 | cis | SARS-CoV-2 infection |
| 13578_98  | ABLM3                           | Actin-binding LIM protein 3                                                     | O94929 | ABLM3    | chr5:149141483  | Wald ratio                | 1  | -0.027 | 0.047 | 5.691E-01 | 0.978 | cis | SARS-CoV-2 infection |
| 2972_57   | BMP-7                           | Bone morphogenetic protein 7                                                    | P18075 | BMP7     | chr20:57266641  | Wald ratio                | 1  | 0.050  | 0.088 | 5.697E-01 | 0.978 | cis | SARS-CoV-2 infection |
| 3331_8    | RGMB                            | RGM domain family member B                                                      | Q6NW40 | RGMB     | chr5:98768650   | Inverse variance weighted | 3  | -0.018 | 0.032 | 5.701E-01 | 0.978 | cis | SARS-CoV-2 infection |
| 2827_23   | Fractalkine/CX3CL-1             | Fractalkine                                                                     | P78423 | CX3CL1   | chr16:57372477  | Wald ratio                | 1  | -0.019 | 0.033 | 5.702E-01 | 0.978 | cis | SARS-CoV-2 infection |
| 4906_35   | Coagulation Factor V            | Coagulation Factor V                                                            | P12259 | F5       | chr1:169586588  | Inverse variance weighted | 5  | -0.009 | 0.015 | 5.705E-01 | 0.978 | cis | SARS-CoV-2 infection |
| 16621_77  | AIBP                            | NAD(P)H-hydrate epimerase                                                       | Q8NCW5 | NAXE     | chr1:156591756  | Wald ratio                | 1  | 0.013  | 0.024 | 5.707E-01 | 0.978 | cis | SARS-CoV-2 infection |
| 12662_82  | ECH1                            | Delta(3,5)-Delta(2,4)-dienoyl-CoA isomerase, mitochondrial                      | Q13011 | ECH1     | chr19:38831841  | Inverse variance weighted | 2  | -0.011 | 0.020 | 5.710E-01 | 0.978 | cis | SARS-CoV-2 infection |
| 3461_58   | PGCB                            | Brevican core protein                                                           | Q96GW7 | BCAN     | chr1:156641390  | Wald ratio                | 1  | 0.014  | 0.026 | 5.711E-01 | 0.978 | cis | SARS-CoV-2 infection |
| 18319_7   | OPDX                            | Pyruvate dehydrogenase protein X component, mitochondrial                       | O00330 | PDHX     | chr11:34915829  | Inverse variance weighted | 2  | 0.023  | 0.041 | 5.723E-01 | 0.978 | cis | SARS-CoV-2 infection |
| 9931_20   | Keratin-1                       | Keratin, type II cytoskeletal 1                                                 | P04264 | KRT1     | chr12:52680407  | Wald ratio                | 1  | -0.067 | 0.119 | 5.726E-01 | 0.978 | cis | SARS-CoV-2 infection |
| 10924_258 | NEUFC                           | Neuferricin                                                                     | Q8WUJ1 | CYB5D2   | chr17:4143168   | Inverse variance weighted | 3  | -0.013 | 0.022 | 5.730E-01 | 0.978 | cis | SARS-CoV-2 infection |
| 7141_21   | MGTA8                           | Alpha-1,3-mannosyl-glycoprotein 4-beta-N-acetylglucosaminyltransferase B        | Q9UQ53 | MGAT4B   | chr5:179806952  | Inverse variance weighted | 4  | -0.013 | 0.022 | 5.735E-01 | 0.978 | cis | SARS-CoV-2 infection |
| 5392_73   | Fas, soluble                    | Tumor necrosis factor receptor superfamily member 6                             | P25445 | FAS      | chr10:88953813  | Inverse variance weighted | 2  | 0.028  | 0.049 | 5.741E-01 | 0.978 | cis | SARS-CoV-2 infection |
| 11126_102 | TRIO                            | Triple functional domain protein                                                | O75962 | TRIO     | chr5:14143342   | Wald ratio                | 1  | -0.059 | 0.106 | 5.756E-01 | 0.978 | cis | SARS-CoV-2 infection |
| 6409_57   | GP116                           | Adhesion G protein-coupled receptor F5                                          | Q8I2F7 | ADGRF5   | chr6:46954943   | Inverse variance weighted | 7  | -0.005 | 0.008 | 5.766E-01 | 0.978 | cis | SARS-CoV-2 infection |
| 14747_9   | CLRF1                           | Cytokine receptor-like factor 1                                                 | O75462 | CLRF1    | chr19:18607741  | Inverse variance weighted | 2  | 0.012  | 0.021 | 5.769E-01 | 0.978 | cis | SARS-CoV-2 infection |
| 4929_55   | SHBG                            | Sex hormone-binding globulin                                                    | P04278 | SHBG     | chr17:7613946   | Inverse variance weighted | 2  | -0.027 | 0.048 | 5.778E-01 | 0.978 | cis | SARS-CoV-2 infection |
| 5656_53   | PP11                            | Poly(U)-specific endoribonuclease                                               | P21128 | ENDOU    | chr12:47725567  | Wald ratio                | 1  | -0.045 | 0.080 | 5.780E-01 | 0.978 | cis | SARS-CoV-2 infection |
| 9826_135  | Fragile histidine triad protein | Bis(5'-adenosyl)-triphosphatase                                                 | P49789 | FHIT     | chr3:61251459   | Inverse variance weighted | 2  | 0.032  | 0.057 | 5.789E-01 | 0.978 | cis | SARS-CoV-2 infection |
| 10666_7   | GNPTG                           | N-acetylglucosamine-1-phosphotransferase subunit gamma                          | Q9UIJ9 | GNPTG    | chr16:1351931   | Inverse variance weighted | 4  | 0.017  | 0.031 | 5.791E-01 | 0.978 | cis | SARS-CoV-2 infection |
| 12859_33  | PECI                            | Enoyl-CoA delta isomerase 2, mitochondrial                                      | O75521 | ECI2     | chr6:41335597   | Inverse variance weighted | 3  | 0.010  | 0.018 | 5.792E-01 | 0.978 | cis | SARS-CoV-2 infection |
| 13700_10  | annexin II                      | Annexin A2                                                                      | P07355 | ANXA2    | chr15:60402883  | Inverse variance weighted | 6  | -0.019 | 0.034 | 5.807E-01 | 0.978 | cis | SARS-CoV-2 infection |
| 2475_1    | SCF sR                          | Mast/stem cell growth factor receptor Kit                                       | P10721 | KIT      | chr4:54657267   | Wald ratio                | 1  | -0.055 | 0.099 | 5.809E-01 | 0.978 | cis | SARS-CoV-2 infection |
| 17737_7   | IVD                             | Isovaleryl-CoA dehydrogenase, mitochondrial                                     | P26440 | IVD      | chr15:40405485  | Inverse variance weighted | 2  | 0.019  | 0.035 | 5.811E-01 | 0.978 | cis | SARS-CoV-2 infection |
| 6455_52   | HPLN4                           | Hyaluronan and proteoglycan link protein 4                                      | Q86UW8 | HAPLN4   | chr19:19262804  | Wald ratio                | 1  | -0.038 | 0.069 | 5.819E-01 | 0.978 | cis | SARS-CoV-2 infection |
| 16057_6   | IGF-II receptor                 | Cation-independent mannose-6-phosphate receptor                                 | P11717 | IGF2R    | chr16:159969082 | Inverse variance weighted | 6  | 0.006  | 0.011 | 5.820E-01 | 0.978 | cis | SARS-CoV-2 infection |
| 6897_38   | B3GA3                           | Galactosylgalactosylxylosylprotein 3-beta-glucuronosyltransferase 3             | O94766 | B3GAT3   | chr11:62622154  | Inverse variance weighted | 3  | -0.012 | 0.022 | 5.821E-01 | 0.978 | cis | SARS-CoV-2 infection |
| 3313_21   | FCN2                            | Ficolin-2                                                                       | Q15485 | FCN2     | chr9:134880810  | Inverse variance weighted | 4  | 0.024  | 0.043 | 5.824E-01 | 0.978 | cis | SARS-CoV-2 infection |
| 6383_90   | TLL1                            | Tolloid-like protein 1                                                          | O43897 | TLL1     | chr4:165873237  | Inverse variance weighted | 2  | 0.036  | 0.066 | 5.840E-01 | 0.978 | cis | SARS-CoV-2 infection |
| 9026_40   | BTNL8                           | Butyrophilin-like protein 8                                                     | Q6UX41 | BTNL8    | chr5:180899077  | Inverse variance weighted | 2  | 0.016  | 0.029 | 5.841E-01 | 0.978 | cis | SARS-CoV-2 infection |
| 8244_16   | FUT8                            | Alpha-(1,6)-fucosyltransferase                                                  | Q9BYC5 | FUT8     | chr14:65410592  | Inverse variance weighted | 10 | 0.006  | 0.012 | 5.843E-01 | 0.978 | cis | SARS-CoV-2 infection |
| 17722_5   | FKBP52 protein                  | Peptidyl-prolyl cis-trans isomerase FKBP4                                       | Q02790 | FKBP4    | chr12:2794970   | Inverse variance weighted | 2  | 0.035  | 0.064 | 5.852E-01 | 0.978 | cis | SARS-CoV-2 infection |
| 19262_219 | ACADV                           | Very long-chain specific acyl-CoA dehydrogenase, mitochondrial                  | P49748 | ACADVL   | chr17:7217125   | Wald ratio                | 1  | -0.053 | 0.097 | 5.858E-01 | 0.978 | cis | SARS-CoV-2 infection |
| 4151_6    | Plasminogen                     | Plasminogen                                                                     | P00747 | PLG      | chr6:160702194  | Inverse variance weighted | 3  | 0.023  | 0.042 | 5.859E-01 | 0.978 | cis | SARS-CoV-2 infection |
| 18225_13  | HEBP1                           | Heme-binding protein 1                                                          | Q9NRV9 | HEBP1    | chr12:13000265  | Inverse variance weighted | 6  | -0.005 | 0.008 | 5.860E-01 | 0.978 | cis | SARS-CoV-2 infection |

|           |                             |                                                                                                         |        |          |                 |                           |    |        |       |           |       |     |                      |
|-----------|-----------------------------|---------------------------------------------------------------------------------------------------------|--------|----------|-----------------|---------------------------|----|--------|-------|-----------|-------|-----|----------------------|
| 9326_33   | ITI heavy chain H2          | Inter-alpha-trypsin inhibitor heavy chain H2                                                            | P19823 | ITI2     | chr10:7703316   | Inverse variance weighted | 9  | -0.006 | 0.010 | 5.868E-01 | 0.978 | cis | SARS-CoV-2 infection |
| 4297_62   | Spondin-1                   | Spondin-1                                                                                               | Q9HC66 | SPON1    | chr11:13962723  | Inverse variance weighted | 4  | 0.009  | 0.016 | 5.872E-01 | 0.978 | cis | SARS-CoV-2 infection |
| 15607_56  | KPYR                        | Pyruvate kinase PKLR                                                                                    | P30613 | PKLR     | chr1:155301438  | Wald ratio                | 1  | -0.021 | 0.039 | 5.884E-01 | 0.978 | cis | SARS-CoV-2 infection |
| 17325_10  | KGUA                        | Guanylate kinase                                                                                        | Q16774 | GUK1     | chr1:228139962  | Inverse variance weighted | 5  | 0.029  | 0.054 | 5.892E-01 | 0.978 | cis | SARS-CoV-2 infection |
| 11178_21  | SVEP1-EGF-like domains 4-6  | Sushi, von Willebrand factor type A, EGF and pentraxin domain-containing protein 1:EGF-like domains 4-6 | Q4LDE5 | SVEP1    | chr9:10579880   | Inverse variance weighted | 4  | 0.023  | 0.042 | 5.898E-01 | 0.978 | cis | SARS-CoV-2 infection |
| 8300_82   | PEX14:N-term                | Peroxisomal membrane protein PEX14:N-term                                                               | O75381 | PEX14    | chr1:10472288   | Wald ratio                | 1  | 0.050  | 0.093 | 5.902E-01 | 0.978 | cis | SARS-CoV-2 infection |
| 19197_95  | THIL                        | Acetyl-CoA acetyltransferase, mitochondrial                                                             | P24752 | ACAT1    | chr11:108116695 | Inverse variance weighted | 2  | 0.032  | 0.059 | 5.910E-01 | 0.978 | cis | SARS-CoV-2 infection |
| 4534_10   | BSSP4                       | Brain-specific serine protease 4                                                                        | Q9GZNA | PRSS22   | chr16:2858170   | Inverse variance weighted | 4  | -0.017 | 0.031 | 5.910E-01 | 0.978 | cis | SARS-CoV-2 infection |
| 15483_377 | Agrin                       | Agrin                                                                                                   | OQ0468 | AGRN     | chr1:1202120    | Inverse variance weighted | 7  | -0.020 | 0.038 | 5.915E-01 | 0.978 | cis | SARS-CoV-2 infection |
| 2864_2    | MEK1                        | Dual specificity mitogen-activated protein kinase kinase 1                                              | QO2750 | MAP2K1   | chr15:66386837  | Wald ratio                | 1  | 0.041  | 0.077 | 5.922E-01 | 0.978 | cis | SARS-CoV-2 infection |
| 5630_48   | CM35H                       | CMR35-like molecule 8                                                                                   | Q9JGNA | CD300A   | chr17:74466399  | Inverse variance weighted | 8  | -0.007 | 0.014 | 5.930E-01 | 0.978 | cis | SARS-CoV-2 infection |
| 9288_7    | FKBP7                       | Peptidyl-prolyl cis-trans isomerase FKBP7                                                               | Q9Y680 | FKBP7    | chr2:178478600  | Inverse variance weighted | 4  | 0.009  | 0.016 | 5.931E-01 | 0.978 | cis | SARS-CoV-2 infection |
| 2780_35   | Lactoferrin                 | Lactotransferrin                                                                                        | P02788 | LTF      | chr3:46485234   | Inverse variance weighted | 3  | -0.014 | 0.026 | 5.943E-01 | 0.978 | cis | SARS-CoV-2 infection |
| 11531_24  | GI24:CD                     | V-type immunoglobulin domain-containing suppressor of T-cell activation:Cytoplasmic domain              | Q9H7M9 | VSIR     | chr10:71773520  | Wald ratio                | 1  | -0.043 | 0.080 | 5.959E-01 | 0.978 | cis | SARS-CoV-2 infection |
| 10833_64  | HHIP                        | Hedgehog-interacting protein                                                                            | Q96QV1 | HHIP     | chr4:144646156  | Inverse variance weighted | 2  | -0.017 | 0.033 | 5.978E-01 | 0.978 | cis | SARS-CoV-2 infection |
| 3795_6    | ADAM 9                      | Disintegrin and metalloproteinase domain-containing protein 9                                           | Q13443 | ADAM9    | chr8:38996754   | Wald ratio                | 1  | 0.066  | 0.126 | 5.993E-01 | 0.978 | cis | SARS-CoV-2 infection |
| 2913_1    | MPIF-1                      | C-C motif chemokine 23                                                                                  | P55773 | CCL23    | chr17:36017972  | Inverse variance weighted | 2  | 0.022  | 0.043 | 5.993E-01 | 0.978 | cis | SARS-CoV-2 infection |
| 8269_327  | ARSK                        | Arylsulfatase K                                                                                         | Q6UWV0 | ARSK     | chr5:95555101   | Wald ratio                | 1  | 0.031  | 0.059 | 5.993E-01 | 0.978 | cis | SARS-CoV-2 infection |
| 5644_60   | RNAS4                       | Ribonuclease 4                                                                                          | P34096 | RNASE4   | chr14:20684560  | Inverse variance weighted | 5  | -0.010 | 0.019 | 6.007E-01 | 0.978 | cis | SARS-CoV-2 infection |
| 6496_60   | DLK1:ECD                    | Protein delta homolog 1:Extracellular domain                                                            | P80370 | DLK1     | chr14:100725705 | Inverse variance weighted | 2  | 0.035  | 0.066 | 6.033E-01 | 0.978 | cis | SARS-CoV-2 infection |
| 13450_49  | UBP8                        | Ubiquitin carboxyl-terminal hydrolase 8                                                                 | P40818 | USP8     | chr15:50424380  | Wald ratio                | 1  | -0.033 | 0.064 | 6.033E-01 | 0.978 | cis | SARS-CoV-2 infection |
| 8877_22   | F176C:ECD                   | Protein eva-1 homolog C:Extracellular domain                                                            | P58658 | EVA1C    | chr21:32412006  | Wald ratio                | 1  | -0.040 | 0.077 | 6.034E-01 | 0.978 | cis | SARS-CoV-2 infection |
| 9595_11   | B4GT2                       | Beta-1,4-galactosyltransferase 2                                                                        | O60909 | B4GALT2  | chr1:43978943   | Inverse variance weighted | 4  | 0.009  | 0.018 | 6.037E-01 | 0.978 | cis | SARS-CoV-2 infection |
| 13068_139 | CCS                         | Copper chaperone for superoxide dismutase                                                               | O14618 | CCS      | chr11:66593153  | Wald ratio                | 1  | -0.021 | 0.040 | 6.057E-01 | 0.978 | cis | SARS-CoV-2 infection |
| 2813_11   | ART                         | Agouti-related protein                                                                                  | O00253 | AGRP     | chr16:67483547  | Inverse variance weighted | 2  | 0.013  | 0.026 | 6.058E-01 | 0.978 | cis | SARS-CoV-2 infection |
| 6255_74   | CPXM1                       | Probable carboxypeptidase X1                                                                            | Q96M33 | CPXM1    | chr20:2800627   | Inverse variance weighted | 6  | -0.008 | 0.016 | 6.059E-01 | 0.978 | cis | SARS-CoV-2 infection |
| 19233_75  | ATOX1                       | Copper transport protein ATOX1                                                                          | O00244 | ATOX1    | chr5:15172532   | Wald ratio                | 1  | -0.047 | 0.091 | 6.059E-01 | 0.978 | cis | SARS-CoV-2 infection |
| 12682_5   | KAT3                        | Kynurenine--oxoglutarate transaminase 3                                                                 | Q6YF21 | KYAT3    | chr1:88992953   | Inverse variance weighted | 7  | 0.008  | 0.015 | 6.068E-01 | 0.978 | cis | SARS-CoV-2 infection |
| 14711_27  | Cystatin M                  | Cystatin-M                                                                                              | Q15828 | CS16     | chr11:66012008  | Wald ratio                | 1  | 0.024  | 0.047 | 6.072E-01 | 0.978 | cis | SARS-CoV-2 infection |
| 2665_26   | BCMA                        | Tumor necrosis factor receptor superfamily member 17                                                    | QO2223 | TNFRSF17 | chr16:11965210  | Wald ratio                | 1  | -0.019 | 0.037 | 6.078E-01 | 0.978 | cis | SARS-CoV-2 infection |
| 3336_50   | TFPI                        | Tissue factor pathway inhibitor                                                                         | P10646 | TFPI     | chr2:187565760  | Wald ratio                | 1  | -0.032 | 0.062 | 6.087E-01 | 0.978 | cis | SARS-CoV-2 infection |
| 6525_17   | DUSP13                      | Dual specificity protein phosphatase 13 isoform A                                                       | Q6B811 | DUSP13   | chr10:75109221  | Inverse variance weighted | 2  | 0.011  | 0.022 | 6.087E-01 | 0.978 | cis | SARS-CoV-2 infection |
| 2571_12   | IGFBP-3                     | Insulin-like growth factor-binding protein 3                                                            | P17936 | IGFBP3   | chr7:45921874   | Inverse variance weighted | 4  | 0.008  | 0.016 | 6.095E-01 | 0.978 | cis | SARS-CoV-2 infection |
| 4127_75   | C6                          | Complement component C6                                                                                 | P13671 | C6       | chr5:41261438   | Inverse variance weighted | 4  | -0.017 | 0.034 | 6.098E-01 | 0.978 | cis | SARS-CoV-2 infection |
| 13632_10  | Zyxin                       | Zyxin                                                                                                   | Q15942 | ZYX      | chr7:143381295  | Wald ratio                | 1  | -0.051 | 0.099 | 6.101E-01 | 0.978 | cis | SARS-CoV-2 infection |
| 8403_18   | Fatty acid synthase         | Fatty acid synthase                                                                                     | P49327 | FASN     | chr17:82098294  | Wald ratio                | 1  | -0.017 | 0.034 | 6.102E-01 | 0.978 | cis | SARS-CoV-2 infection |
| 15633_6   | RBP                         | Retinol-binding protein 4                                                                               | P02753 | RBP4     | chr10:93601744  | Wald ratio                | 1  | 0.031  | 0.060 | 6.104E-01 | 0.978 | cis | SARS-CoV-2 infection |
| 6485_59   | IGLL1                       | Immunoglobulin lambda-like polypeptide 1                                                                | P15814 | IGLL1    | chr22:23580302  | Inverse variance weighted | 4  | -0.007 | 0.013 | 6.110E-01 | 0.978 | cis | SARS-CoV-2 infection |
| 4467_49   | SPARCL1                     | SPARC-like protein 1                                                                                    | Q14515 | SPARCL1  | chr4:87531061   | Inverse variance weighted | 6  | -0.009 | 0.018 | 6.122E-01 | 0.978 | cis | SARS-CoV-2 infection |
| 12016_60  | CBL                         | E3 ubiquitin-protein ligase CBL                                                                         | P22681 | CBL      | chr11:119206298 | Wald ratio                | 1  | 0.018  | 0.036 | 6.130E-01 | 0.978 | cis | SARS-CoV-2 infection |
| 12008_3   | CD7                         | T-cell antigen CD7                                                                                      | P09564 | CD7      | chr17:82317608  | Inverse variance weighted | 5  | -0.037 | 0.074 | 6.133E-01 | 0.978 | cis | SARS-CoV-2 infection |
| 3605_77   | MASP3:Light                 | Mannan-binding lectin serine protease 1:Mannan-binding lectin serine protease 1 light chain             | P48740 | MASP3    | chr3:187291980  | Wald ratio                | 1  | 0.030  | 0.059 | 6.153E-01 | 0.978 | cis | SARS-CoV-2 infection |
| 18216_22  | IL-11 RA                    | Interleukin-11 receptor subunit alpha                                                                   | Q14626 | IL11RA   | chr9:34652162   | Inverse variance weighted | 3  | 0.020  | 0.040 | 6.157E-01 | 0.978 | cis | SARS-CoV-2 infection |
| 18916_25  | Inosine triphosphatase      | Inosine triphosphate pyrophosphatase                                                                    | Q9BY32 | ITPA     | chr20:3208868   | Inverse variance weighted | 8  | -0.005 | 0.010 | 6.163E-01 | 0.978 | cis | SARS-CoV-2 infection |
| 5478_50   | PSMA                        | Glutamate carboxypeptidase 2                                                                            | Q04609 | FOLH1    | chr11:49208638  | Inverse variance weighted | 2  | -0.014 | 0.029 | 6.168E-01 | 0.978 | cis | SARS-CoV-2 infection |
| 6081_52   | PCOC2                       | Procollagen C-endopeptidase enhancer 2                                                                  | Q9UKZ9 | PCOLCE2  | chr3:142889206  | Inverse variance weighted | 10 | -0.005 | 0.010 | 6.180E-01 | 0.978 | cis | SARS-CoV-2 infection |
| 17435_43  | ETFA                        | Electron transfer flavoprotein subunit alpha, mitochondrial                                             | P13804 | ETFA     | chr15:76311730  | Wald ratio                | 1  | -0.045 | 0.091 | 6.182E-01 | 0.978 | cis | SARS-CoV-2 infection |
| 13112_179 | FSTL1                       | Follistatin-related protein 1                                                                           | Q12841 | FSTL1    | chr3:120450993  | Inverse variance weighted | 2  | 0.014  | 0.028 | 6.189E-01 | 0.978 | cis | SARS-CoV-2 infection |
| 3074_6    | LBP                         | Lipopolysaccharide-binding protein                                                                      | P18428 | LBP      | chr20:38346482  | Inverse variance weighted | 5  | 0.009  | 0.019 | 6.193E-01 | 0.978 | cis | SARS-CoV-2 infection |
| 19277_4   | KAT                         | Thiosulfate sulfurtransferase/rhodanese-like domain-containing protein 1                                | Q8NFU3 | TSTD1    | chr1:161038977  | Inverse variance weighted | 2  | 0.016  | 0.032 | 6.205E-01 | 0.978 | cis | SARS-CoV-2 infection |
| 2637_77   | Macrophage mannose receptor | Macrophage mannose receptor 1                                                                           | P22897 | MRC1     | chr10:17809348  | Inverse variance weighted | 7  | -0.012 | 0.024 | 6.215E-01 | 0.978 | cis | SARS-CoV-2 infection |
| 4154_57   | P-Selectin                  | P-selectin                                                                                              | P16109 | SELP     | chr1:169630193  | Inverse variance weighted | 3  | -0.015 | 0.030 | 6.215E-01 | 0.978 | cis | SARS-CoV-2 infection |
| 6472_40   | GP100                       | Melanocyte protein PMEL                                                                                 | P40967 | PMEL     | chr12:55973317  | Inverse variance weighted | 2  | -0.010 | 0.020 | 6.224E-01 | 0.978 | cis | SARS-CoV-2 infection |
| 12612_37  | PSB1                        | Proteasome subunit beta type-1                                                                          | P20618 | PSMB1    | chr6:170553307  | Inverse variance weighted | 2  | 0.007  | 0.015 | 6.228E-01 | 0.978 | cis | SARS-CoV-2 infection |
| 9839_148  | Tirap                       | Toll/interleukin-1 receptor domain-containing adapter protein                                           | P58753 | TIRAP    | chr11:126282497 | Inverse variance weighted | 3  | -0.020 | 0.042 | 6.242E-01 | 0.978 | cis | SARS-CoV-2 infection |
| 2515_14   | GFRa-2                      | GDNF family receptor alpha-2                                                                            | O00451 | GFR2     | chr8:21812357   | Inverse variance weighted | 6  | -0.008 | 0.015 | 6.244E-01 | 0.978 | cis | SARS-CoV-2 infection |
| 17766_5   | NCF-1                       | Neutrophil cytosol factor 1                                                                             | P14598 | NCF1     | chr7:74774011   | Inverse variance weighted | 4  | -0.010 | 0.020 | 6.246E-01 | 0.978 | cis | SARS-CoV-2 infection |
| 4469_78   | ST456                       | Carbohydrate sulfotransferase 15                                                                        | Q7LFX5 | CHST15   | chr10:124093598 | Inverse variance weighted | 2  | 0.020  | 0.041 | 6.251E-01 | 0.978 | cis | SARS-CoV-2 infection |
| 3474_19   | Thrombospondin-1            | Thrombospondin-1                                                                                        | P07996 | THBS1    | chr15:39581079  | Wald ratio                | 1  | 0.048  | 0.098 | 6.266E-01 | 0.978 | cis | SARS-CoV-2 infection |
| 10462_14  | INSL5                       | Insulin-like peptide INSL5                                                                              | Q9Y5Q6 | INSL5    | chr1:66801276   | Wald ratio                | 1  | -0.040 | 0.083 | 6.273E-01 | 0.978 | cis | SARS-CoV-2 infection |
| 19635_69  | FGL2                        | Fibroleukin                                                                                             | Q14314 | FGL2     | chr7:77199848   | Wald ratio                | 1  | 0.042  | 0.087 | 6.278E-01 | 0.978 | cis | SARS-CoV-2 infection |
| 13983_27  | QOR                         | Quinone oxidoreductase                                                                                  | Q08257 | CRYZ     | chr1:74733408   | Inverse variance weighted | 7  | 0.006  | 0.012 | 6.279E-01 | 0.978 | cis | SARS-CoV-2 infection |
| 5223_59   | GCKR                        | Glucokinase regulatory protein                                                                          | Q14397 | GCKR     | chr2:27496839   | Wald ratio                | 1  | -0.026 | 0.053 | 6.283E-01 | 0.978 | cis | SARS-CoV-2 infection |
| 7156_2    | FUT10                       | Alpha-(1,3)-fucosyltransferase 10                                                                       | Q6P4F1 | FUT10    | chr8:33473146   | Inverse variance weighted | 7  | -0.005 | 0.010 | 6.283E-01 | 0.978 | cis | SARS-CoV-2 infection |
| 13947_371 | NUD12                       | Peroxisomal NADH pyrophosphatase NUDT12                                                                 | Q9BGQ2 | NUDT12   | chr5:103562790  | Inverse variance weighted | 4  | -0.010 | 0.020 | 6.287E-01 | 0.978 | cis | SARS-CoV-2 infection |
| 4978_54   | DBNL                        | Drebrin-like protein                                                                                    | Q9JUG6 | DBNL     | chr7:44044640   | Wald ratio                | 1  | 0.040  | 0.083 | 6.288E-01 | 0.978 | cis | SARS-CoV-2 infection |
| 3059_50   | BAFF                        | Tumor necrosis factor ligand superfamily member 13B                                                     | Q9Y275 | TNFSF13B | chr13:108251240 | Inverse variance weighted | 3  | -0.025 | 0.051 | 6.316E-01 | 0.978 | cis | SARS-CoV-2 infection |
| 19581_15  | IGFBP-5                     | Insulin-like growth factor-binding protein 5                                                            | P24593 | IGFBP5   | chr2:216695549  | Wald ratio                | 1  | -0.044 | 0.093 | 6.326E-01 | 0.978 | cis | SARS-CoV-2 infection |
| 17794_6   | Phosphomannomutase 2        | Phosphomannomutase 2                                                                                    | O15305 | PMNM2    | chr16:8788823   | Inverse variance weighted | 4  | 0.013  | 0.027 | 6.328E-01 | 0.978 | cis | SARS-CoV-2 infection |
| 4455_89   | MFGM                        | Lactadherin                                                                                             | Q08431 | MFG8     | chr15:88913468  | Inverse variance weighted | 4  | -0.009 | 0.018 | 6.339E-01 | 0.978 | cis | SARS-CoV-2 infection |
| 5480_49   | RANTES                      | C-C motif chemokine 5                                                                                   | P13501 | CCL5     | chr17:35880793  | Inverse variance weighted | 2  | 0.023  | 0.048 | 6.342E-01 | 0.978 | cis | SARS-CoV-2 infection |
| 17210_2   | TCL1A                       | T-cell leukemia/lymphoma protein 1A                                                                     | P56279 | TCL1A    | chr14:95714196  | Inverse variance weighted | 3  | -0.011 | 0.024 | 6.347E-01 | 0.978 | cis | SARS-CoV-2 infection |
| 5102_55   | MICB                        | MHC class I polypeptide-related sequence B                                                              | Q29980 | MICB     | chr6:31494881   | Inverse variance weighted | 6  | 0.008  | 0.016 | 6.359E-01 | 0.978 | cis | SARS-CoV-2 infection |
| 6392_7    | WISP-2                      | WNT1-inducible-signaling pathway protein 2                                                              | O76076 | CNNS     | chr20:44714844  | Inverse variance weighted | 5  | -0.008 | 0.017 | 6.359E-01 | 0.978 | cis | SARS-CoV-2 infection |
| 18172_71  | ASF1A                       | Histone chaperone ASF1A                                                                                 | Q9Y294 | ASF1A    | chr6:118894152  | Wald ratio                | 1  | 0.022  | 0.046 | 6.373E-01 | 0.978 | cis | SARS-CoV-2 infection |
| 13986_6   | LANC1                       | LaNC-like protein 1                                                                                     | O43813 | LANC1    | chr2:210477652  | Inverse variance weighted | 2  | -0.021 | 0.045 | 6.374E-01 | 0.978 | cis | SARS-CoV-2 infection |
| 6507_16   | NCAM2                       | Neural cell adhesion molecule 2                                                                         | O15394 | NCAM2    | chr21:20998409  | Inverse variance weighted | 6  | 0.006  | 0.012 | 6.386E-01 | 0.978 | cis | SARS-CoV-2 infection |
| 9484_75   | Desmoglein-2                | Desmoglein-2                                                                                            | Q14126 | DSG2     | chr18:31498177  | Inverse variance weighted | 5  | -0.015 | 0.032 | 6.390E-01 | 0.978 | cis | SARS-CoV-2 infection |

|           |                                  |                                                                                                |        |            |                 |                           |    |        |       |           |       |     |                      |
|-----------|----------------------------------|------------------------------------------------------------------------------------------------|--------|------------|-----------------|---------------------------|----|--------|-------|-----------|-------|-----|----------------------|
| 17320_19  | ADPPT                            | L-aminoacidate-semialdehyde dehydrogenase-phosphopantetheinyl transferase                      | Q9NRN7 | AASDHPPT   | chr11:106075501 | Wald ratio                | 1  | 0.051  | 0.109 | 6.393E-01 | 0.978 | cis | SARS-CoV-2 infection |
| 12361_102 | RRAS2                            | Ras-related protein R-Ras2                                                                     | P62070 | RRAS2      | chr11:14364506  | Wald ratio                | 1  | -0.018 | 0.039 | 6.419E-01 | 0.978 | cis | SARS-CoV-2 infection |
| 15556_49  | Alpha-amylase 2B                 | Alpha-amylase 2B                                                                               | P19961 | AMY2B      | chr1:103553815  | Inverse variance weighted | 4  | 0.024  | 0.053 | 6.427E-01 | 0.978 | cis | SARS-CoV-2 infection |
| 10772_21  | CGAT2                            | Chondroitin sulfate N-acetylgalactosaminyltransferase 2                                        | Q8NG65 | CSGALNACT2 | chr10:43138445  | Wald ratio                | 1  | -0.023 | 0.051 | 6.433E-01 | 0.978 | cis | SARS-CoV-2 infection |
| 9867_23   | F16P2                            | Fructose-1,6-bisphosphatase isozyme 2                                                          | O00757 | FBP2       | chr9:94593824   | Wald ratio                | 1  | -0.023 | 0.049 | 6.434E-01 | 0.978 | cis | SARS-CoV-2 infection |
| 3181_50   | Cathepsin S                      | Cathepsin S                                                                                    | P25774 | CTSS       | chr1:150765957  | Inverse variance weighted | 3  | -0.006 | 0.013 | 6.437E-01 | 0.978 | cis | SARS-CoV-2 infection |
| 2681_23   | HGF                              | Hepatocyte growth factor                                                                       | P14210 | HGF        | chr7:81770438   | Wald ratio                | 1  | -0.020 | 0.044 | 6.439E-01 | 0.978 | cis | SARS-CoV-2 infection |
| 12812_25  | ACYP2                            | Acylphosphatase-2                                                                              | P14621 | ACYP2      | chr2:53970838   | Inverse variance weighted | 3  | 0.010  | 0.021 | 6.443E-01 | 0.978 | cis | SARS-CoV-2 infection |
| 2797_56   | Apo B                            | Apolipoprotein B                                                                               | P04114 | APOB       | chr2:21044073   | Wald ratio                | 1  | 0.031  | 0.067 | 6.444E-01 | 0.978 | cis | SARS-CoV-2 infection |
| 5012_67   | Myokinase, human                 | Adenylate kinase isoenzyme 1                                                                   | P00568 | AK1        | chr9:127877675  | Wald ratio                | 1  | -0.052 | 0.113 | 6.448E-01 | 0.978 | cis | SARS-CoV-2 infection |
| 16851_50  | SCO2                             | Protein SCO2 homolog, mitochondrial                                                            | O43819 | SCO2       | chr22:50526461  | Wald ratio                | 1  | 0.023  | 0.050 | 6.463E-01 | 0.978 | cis | SARS-CoV-2 infection |
| 15336_7   | SELM                             | Selenoprotein M                                                                                | Q8WWX9 | SELENOM    | chr22:31120069  | Wald ratio                | 1  | 0.043  | 0.094 | 6.469E-01 | 0.978 | cis | SARS-CoV-2 infection |
| 17391_10  | SPF45                            | Splicing factor 45                                                                             | Q96I25 | RBM17      | chr10:6089034   | Inverse variance weighted | 2  | 0.011  | 0.023 | 6.473E-01 | 0.978 | cis | SARS-CoV-2 infection |
| 10511_10  | Collagen alpha-3(VI):isoform 3   | Collagen alpha-3(VI) chain:isoform 3                                                           | P12111 | COL6A3     | chr2:237414328  | Inverse variance weighted | 2  | -0.018 | 0.040 | 6.481E-01 | 0.978 | cis | SARS-CoV-2 infection |
| 8428_102  | NTRI                             | Neurotrophin                                                                                   | Q9P121 | NTM        | chr11:131370478 | Inverse variance weighted | 4  | -0.019 | 0.042 | 6.483E-01 | 0.978 | cis | SARS-CoV-2 infection |
| 6039_24   | CRHBP                            | Corticotropin-releasing factor-binding protein                                                 | P24387 | CRHBP      | chr5:76953045   | Inverse variance weighted | 6  | -0.006 | 0.014 | 6.485E-01 | 0.978 | cis | SARS-CoV-2 infection |
| 10391_1   | ANGL3                            | Angiotensin-related protein 3                                                                  | Q9Y5C1 | ANGPTL3    | chr1:62597520   | Inverse variance weighted | 7  | -0.006 | 0.013 | 6.489E-01 | 0.978 | cis | SARS-CoV-2 infection |
| 3329_14   | PGRP-S                           | Peptidoglycan recognition protein 1                                                            | O75594 | PGLYRP1    | chr19:46023053  | Inverse variance weighted | 4  | -0.015 | 0.033 | 6.490E-01 | 0.978 | cis | SARS-CoV-2 infection |
| 8225_86   | EPHB2                            | Ephrin type-B receptor 2                                                                       | P29323 | EPHB2      | chr1:22710839   | Inverse variance weighted | 3  | 0.013  | 0.029 | 6.491E-01 | 0.978 | cis | SARS-CoV-2 infection |
| 18215_5   | THG1                             | Probable tRNA(His) guanylyltransferase                                                         | Q9NWV6 | THG1L      | chr5:157731420  | Inverse variance weighted | 3  | -0.009 | 0.019 | 6.494E-01 | 0.978 | cis | SARS-CoV-2 infection |
| 6626_81   | CHSTC                            | Carbohydrate sulfotransferase 12                                                               | Q9NRB3 | CHST12     | chr7:2403588    | Inverse variance weighted | 2  | -0.012 | 0.027 | 6.503E-01 | 0.978 | cis | SARS-CoV-2 infection |
| 6572_10   | LRRT4:ECD                        | Leucine-rich repeat transmembrane neuronal protein 4:Isoform 2, Extracellular domain           | Q86VH4 | LRRTM4     | chr2:77593319   | Wald ratio                | 1  | 0.046  | 0.101 | 6.508E-01 | 0.978 | cis | SARS-CoV-2 infection |
| 5509_7    | EGF:ECD                          | Epidermal growth factor:Extracellular domain                                                   | P01133 | EGF        | chr4:109912883  | Inverse variance weighted | 4  | -0.018 | 0.040 | 6.512E-01 | 0.978 | cis | SARS-CoV-2 infection |
| 6252_62   | Secretoglobin family 3A member 1 | Secretoglobin family 3A member 1                                                               | Q96QR1 | SCGB3A1    | chr5:180591499  | Inverse variance weighted | 4  | -0.010 | 0.023 | 6.517E-01 | 0.978 | cis | SARS-CoV-2 infection |
| 6385_63   | VWA1                             | von Willebrand factor A domain-containing protein 1                                            | Q6PCB0 | VWA1       | chr1:1434861    | Inverse variance weighted | 4  | 0.007  | 0.015 | 6.519E-01 | 0.978 | cis | SARS-CoV-2 infection |
| 4234_8    | IL-1 R4                          | Interleukin-1 receptor-like 1                                                                  | Q01638 | IL1RL1     | chr2:102311502  | Inverse variance weighted | 8  | 0.005  | 0.012 | 6.526E-01 | 0.978 | cis | SARS-CoV-2 infection |
| 18882_7   | CSTN2                            | Calsynenin-2                                                                                   | Q9H4D0 | CLSTN2     | chr3:139935185  | Inverse variance weighted | 7  | -0.007 | 0.016 | 6.532E-01 | 0.978 | cis | SARS-CoV-2 infection |
| 11117_2   | SPT20                            | Spermatogenesis-associated protein 20                                                          | Q8TB22 | SPATA20    | chr17:50543058  | Inverse variance weighted | 4  | -0.014 | 0.031 | 6.544E-01 | 0.978 | cis | SARS-CoV-2 infection |
| 12486_8   | GLRX2                            | Glutaredoxin-2, mitochondrial                                                                  | Q9NS18 | GLRX2      | chr1:193106114  | Inverse variance weighted | 3  | -0.014 | 0.031 | 6.548E-01 | 0.978 | cis | SARS-CoV-2 infection |
| 18343_10  | DECRR                            | Peroxisomal 2,4-dienoyl-CoA reductase                                                          | Q9NUJ1 | DECRR      | chr16:401858    | Inverse variance weighted | 5  | -0.012 | 0.027 | 6.550E-01 | 0.978 | cis | SARS-CoV-2 infection |
| 17776_15  | PECR                             | Peroxisomal trans-2-enoyl-CoA reductase                                                        | Q9BY49 | PECR       | chr2:216082955  | Wald ratio                | 1  | 0.023  | 0.052 | 6.553E-01 | 0.978 | cis | SARS-CoV-2 infection |
| 16049_43  | OLR1                             | Oxidized low-density lipoprotein receptor 1                                                    | P78380 | OLR1       | chr12:10172138  | Wald ratio                | 1  | 0.026  | 0.059 | 6.561E-01 | 0.978 | cis | SARS-CoV-2 infection |
| 18871_24  | AIF1L                            | Allograft inflammatory factor 1-like                                                           | Q9BQI0 | AIF1L      | chr9:131096476  | Inverse variance weighted | 5  | 0.005  | 0.012 | 6.568E-01 | 0.978 | cis | SARS-CoV-2 infection |
| 15462_28  | CD8A                             | T-cell surface glycoprotein CD8 alpha chain                                                    | P01732 | CD8A       | chr2:86808396   | Inverse variance weighted | 2  | -0.007 | 0.016 | 6.581E-01 | 0.978 | cis | SARS-CoV-2 infection |
| 8766_29   | LIRAS                            | Leukocyte immunoglobulin-like receptor subfamily A member 5                                    | AGN173 | LIRAS      | chr19:54313166  | Wald ratio                | 1  | -0.037 | 0.083 | 6.581E-01 | 0.978 | cis | SARS-CoV-2 infection |
| 16309_30  | Soggy-1                          | Dickkopf-like protein 1                                                                        | Q9UK85 | DKK1L      | chr19:49361783  | Wald ratio                | 1  | 0.047  | 0.106 | 6.585E-01 | 0.978 | cis | SARS-CoV-2 infection |
| 9231_23   | IMPA3                            | Inositol monophosphatase 3                                                                     | Q9NX62 | BPNT2      | chr8:56993867   | Inverse variance weighted | 6  | 0.006  | 0.013 | 6.590E-01 | 0.978 | cis | SARS-CoV-2 infection |
| 11288_26  | 5NTC                             | Cytosolic purine 5'-nucleotidase                                                               | P49902 | NT5C2      | chr10:103277605 | Inverse variance weighted | 3  | -0.014 | 0.032 | 6.592E-01 | 0.978 | cis | SARS-CoV-2 infection |
| 2609_59   | Cystatin C                       | Cystatin-C                                                                                     | P01034 | CST3       | chr20:23638473  | Inverse variance weighted | 2  | 0.021  | 0.049 | 6.602E-01 | 0.978 | cis | SARS-CoV-2 infection |
| 12786_61  | GDE5                             | Glycerophosphocholine phosphodiesterase GPCPD1                                                 | Q9NPF8 | GPCPD1     | chr20:5611006   | Inverse variance weighted | 2  | -0.027 | 0.061 | 6.609E-01 | 0.978 | cis | SARS-CoV-2 infection |
| 3431_54   | EphA1                            | Ephrin type-A receptor 1                                                                       | P21709 | EPHA1      | chr7:143408856  | Inverse variance weighted | 7  | 0.004  | 0.010 | 6.625E-01 | 0.978 | cis | SARS-CoV-2 infection |
| 3727_35   | PYY                              | Peptide YY                                                                                     | P10082 | PYY        | chr17:44004469  | Wald ratio                | 1  | 0.029  | 0.066 | 6.629E-01 | 0.978 | cis | SARS-CoV-2 infection |
| 16803_4   | CALB2                            | Calretinin                                                                                     | P22676 | CALB2      | chr16:71358713  | Inverse variance weighted | 2  | 0.034  | 0.078 | 6.630E-01 | 0.978 | cis | SARS-CoV-2 infection |
| 6576_1    | ART4                             | Ecto-ADP-ribosyltransferase 4                                                                  | Q93070 | ART4       | chr12:14843526  | Inverse variance weighted | 12 | -0.004 | 0.009 | 6.633E-01 | 0.978 | cis | SARS-CoV-2 infection |
| 5837_49   | LI-FcR                           | Leukemia inhibitory factor receptor                                                            | P42702 | LI-FcR     | chr5:38608354   | Inverse variance weighted | 4  | -0.012 | 0.028 | 6.636E-01 | 0.978 | cis | SARS-CoV-2 infection |
| 12386_11  | AMPB                             | Aminopeptidase B                                                                               | Q9H4A4 | RNPEP      | chr1:201982372  | Inverse variance weighted | 5  | -0.006 | 0.015 | 6.637E-01 | 0.978 | cis | SARS-CoV-2 infection |
| 7266_4    | SPA9                             | Serpin A9                                                                                      | Q86VD7 | SERPINA9   | chr14:94479689  | Inverse variance weighted | 2  | 0.023  | 0.054 | 6.660E-01 | 0.978 | cis | SARS-CoV-2 infection |
| 3007_7    | Siglec-9                         | Sialic acid-binding Ig-like lectin 9                                                           | Q9Y336 | SIGLEC9    | chr19:51124906  | Inverse variance weighted | 6  | -0.008 | 0.018 | 6.660E-01 | 0.978 | cis | SARS-CoV-2 infection |
| 9416_77   | CBPM                             | Carboxypeptidase M                                                                             | P14384 | CPM        | chr12:68971570  | Wald ratio                | 1  | -0.022 | 0.050 | 6.662E-01 | 0.978 | cis | SARS-CoV-2 infection |
| 15468_14  | FHR1                             | Complement factor H-related protein 1                                                          | Q03591 | CFHR1      | chr1:196819731  | Inverse variance weighted | 6  | 0.006  | 0.014 | 6.673E-01 | 0.978 | cis | SARS-CoV-2 infection |
| 11098_1   | PDXK                             | Pyridoxal kinase                                                                               | O00764 | PDXK       | chr21:43719094  | Inverse variance weighted | 6  | -0.012 | 0.028 | 6.673E-01 | 0.978 | cis | SARS-CoV-2 infection |
| 11109_56  | SVEP1:Sushi 15-18                | Sushi, von Willebrand factor type A, EGF and pentraxin domain-containing protein 1:Sushi 15-18 | Q4LDE5 | SVEP1      | chr9:110579880  | Inverse variance weighted | 4  | 0.022  | 0.052 | 6.698E-01 | 0.978 | cis | SARS-CoV-2 infection |
| 13397_88  | HBD-2                            | Beta-defensin 4A                                                                               | Q15263 | DEFB4A     | chr8:7894677    | Inverse variance weighted | 3  | 0.015  | 0.036 | 6.708E-01 | 0.978 | cis | SARS-CoV-2 infection |
| 15491_20  | CD248                            | Endosialin                                                                                     | Q9HCU0 | CD248      | chr11:66317044  | Inverse variance weighted | 2  | 0.042  | 0.098 | 6.709E-01 | 0.978 | cis | SARS-CoV-2 infection |
| 12975_11  | Keratin 20                       | Keratin, type I cytoskeletal 20                                                                | P35900 | KRT20      | chr17:40885242  | Inverse variance weighted | 2  | -0.029 | 0.068 | 6.709E-01 | 0.978 | cis | SARS-CoV-2 infection |
| 18880_81  | Collagen Type III                | Collagen Type III                                                                              | P02461 | COL3A1     | chr2:188974373  | Inverse variance weighted | 2  | -0.029 | 0.069 | 6.712E-01 | 0.978 | cis | SARS-CoV-2 infection |
| 17739_1   | HCDH                             | Hydroxyacyl-coenzyme A dehydrogenase, mitochondrial                                            | Q16836 | HADH       | chr4:107989714  | Wald ratio                | 1  | -0.030 | 0.071 | 6.721E-01 | 0.978 | cis | SARS-CoV-2 infection |
| 3554_24   | Adiponectin                      | Adiponectin                                                                                    | Q15848 | ADIPOQ     | chr3:186842704  | Inverse variance weighted | 4  | -0.009 | 0.022 | 6.721E-01 | 0.978 | cis | SARS-CoV-2 infection |
| 13642_90  | CIG49                            | Interferon-induced protein with tetratricopeptide repeats 3                                    | O14879 | IFIT3      | chr10:89327307  | Wald ratio                | 1  | -0.025 | 0.059 | 6.725E-01 | 0.978 | cis | SARS-CoV-2 infection |
| 3077_66   | Coagulation Factor Xa            | Coagulation factor Xa                                                                          | P00472 | F10        | chr13:113122799 | Inverse variance weighted | 2  | -0.030 | 0.070 | 6.731E-01 | 0.978 | cis | SARS-CoV-2 infection |
| 19273_3   | Glutathione reductase            | Glutathione reductase, mitochondrial                                                           | P00390 | GSR        | chr8:30727846   | Inverse variance weighted | 3  | -0.030 | 0.070 | 6.732E-01 | 0.978 | cis | SARS-CoV-2 infection |
| 15535_3   | Marapsin                         | Serine protease 27                                                                             | Q980R3 | PRSS27     | chr16:2720551   | Wald ratio                | 1  | 0.013  | 0.031 | 6.734E-01 | 0.978 | cis | SARS-CoV-2 infection |
| 12764_3   | ELMO1                            | Engulfment and cell motility protein 1                                                         | Q92556 | ELMO1      | chr7:37449223   | Inverse variance weighted | 3  | -0.024 | 0.057 | 6.740E-01 | 0.978 | cis | SARS-CoV-2 infection |
| 12851_5   | DPOLM                            | DNA-directed DNA/RNA polymerase mu                                                             | Q9NPF7 | POLM       | chr7:44082530   | Inverse variance weighted | 3  | 0.012  | 0.028 | 6.747E-01 | 0.978 | cis | SARS-CoV-2 infection |
| 13697_51  | GPDA                             | Glycerol-3-phosphate dehydrogenase [NAD(+)], cytoplasmic                                       | P21695 | GPDI       | chr12:50103982  | Wald ratio                | 1  | 0.027  | 0.065 | 6.748E-01 | 0.978 | cis | SARS-CoV-2 infection |
| 7784_1    | Kininogen, HMW                   | Kininogen-1                                                                                    | P01042 | KNIG1      | chr3:186717348  | Inverse variance weighted | 2  | -0.029 | 0.069 | 6.753E-01 | 0.978 | cis | SARS-CoV-2 infection |
| 11212_7   | TXND5                            | Thioredoxin domain-containing protein 5                                                        | Q8NB59 | TXND5C5    | chr6:7910788    | Inverse variance weighted | 6  | 0.008  | 0.020 | 6.755E-01 | 0.978 | cis | SARS-CoV-2 infection |
| 5798_3    | BID                              | BH3-interacting domain death agonist                                                           | P55957 | BID        | chr22:17774770  | Wald ratio                | 1  | 0.027  | 0.065 | 6.770E-01 | 0.978 | cis | SARS-CoV-2 infection |
| 9191_8    | Trefoil factor 2                 | Trefoil factor 2                                                                               | Q03403 | TFRF2      | chr21:42350997  | Inverse variance weighted | 2  | -0.020 | 0.047 | 6.771E-01 | 0.978 | cis | SARS-CoV-2 infection |
| 3283_21   | BGH3                             | Transforming growth factor-beta-induced protein ig-h3                                          | Q15582 | TGFBI      | chr5:136028988  | Inverse variance weighted | 5  | 0.008  | 0.019 | 6.797E-01 | 0.978 | cis | SARS-CoV-2 infection |
| 4129_72   | Factor B                         | Complement factor B                                                                            | P00751 | CFB        | chr6:31945650   | Inverse variance weighted | 3  | -0.024 | 0.059 | 6.800E-01 | 0.978 | cis | SARS-CoV-2 infection |
| 15542_19  | KCRU                             | Creatine kinase U-type, mitochondrial                                                          | P12532 | CKMT1A     | chr15:43692886  | Wald ratio                | 1  | 0.023  | 0.056 | 6.822E-01 | 0.978 | cis | SARS-CoV-2 infection |
| 15579_26  | ENPP6                            | Ectonucleotide pyrophosphatase/phosphodiesterase family member 6                               | Q6UWR7 | ENPP6      | chr4:184221230  | Wald ratio                | 1  | -0.037 | 0.091 | 6.828E-01 | 0.978 | cis | SARS-CoV-2 infection |
| 6557_50   | LRC15                            | Leucine-rich repeat-containing protein 15                                                      | Q8TF66 | LRC15      | chr3:194369743  | Inverse variance weighted | 4  | 0.006  | 0.015 | 6.853E-01 | 0.978 | cis | SARS-CoV-2 infection |
| 3293_2    | CD5L                             | CDS antigen-like                                                                               | O43866 | CD5L       | chr1:157898256  | Inverse variance weighted | 4  | 0.011  | 0.028 | 6.857E-01 | 0.978 | cis | SARS-CoV-2 infection |
| 11387_3   | ATF6B                            | Cyclic AMP-dependent transcription factor ATF-6 beta                                           | Q99941 | ATF6B      | chr6:32128253   | Inverse variance weighted | 3  | -0.019 | 0.046 | 6.890E-01 | 0.978 | cis | SARS-CoV-2 infection |
| 18181_2   | TSSC4                            | Protein TSSC4                                                                                  | Q9Y5U2 | TSSC4      | chr11:2400488   | Wald ratio                | 1  | 0.049  | 0.123 | 6.892E-01 | 0.978 | cis | SARS-CoV-2 infection |
| 8786_6    | F171B:ECD                        | Protein FAM171B:Extracellular domain                                                           | Q6P995 | FAM171B    | chr2:186694060  | Wald ratio                | 1  | -0.013 | 0.032 | 6.913E-01 | 0.978 | cis | SARS-CoV-2 infection |

|           |                          |                                                                                             |        |          |                 |                           |    |        |       |           |       |     |                      |
|-----------|--------------------------|---------------------------------------------------------------------------------------------|--------|----------|-----------------|---------------------------|----|--------|-------|-----------|-------|-----|----------------------|
| 18413_24  | ARL4D                    | ADP-ribosylation factor-like protein 4D                                                     | P49703 | ARL4D    | chr17:43398993  | Wald ratio                | 1  | -0.035 | 0.089 | 6.915E-01 | 0.978 | cis | SARS-CoV-2 infection |
| 3041_55   | MRC2                     | C-type mannose receptor 2                                                                   | Q9UBG0 | MRC2     | chr17:62627670  | Inverse variance weighted | 6  | -0.017 | 0.043 | 6.920E-01 | 0.978 | cis | SARS-CoV-2 infection |
| 14106_46  | GDP/GTP exchange protein | Rap1 GTPase-GDP dissociation stimulator 1                                                   | P52306 | RAP1GDS1 | chr4:98261384   | Wald ratio                | 1  | -0.038 | 0.097 | 6.927E-01 | 0.978 | cis | SARS-CoV-2 infection |
| 12641_3   | ISP2                     | Type II inositol 1,4,5-trisphosphate 5-phosphatase                                          | P32019 | INPP5B   | chr1:37947057   | Inverse variance weighted | 2  | 0.012  | 0.031 | 6.927E-01 | 0.978 | cis | SARS-CoV-2 infection |
| 5363_51   | Semaphorin 3E            | Semaphorin-3E                                                                               | O15041 | SEMA3E   | chr7:83649139   | Inverse variance weighted | 10 | 0.004  | 0.010 | 6.934E-01 | 0.978 | cis | SARS-CoV-2 infection |
| 10396_6   | Mcl-1                    | Induced myeloid leukemia cell differentiation protein Mcl-1                                 | Q07820 | MCL1     | chr1:150579738  | Wald ratio                | 1  | 0.015  | 0.039 | 6.940E-01 | 0.978 | cis | SARS-CoV-2 infection |
| 10781_19  | CLCAG                    | C-type lectin domain family 4 member G                                                      | Q6UXB4 | CLEC4G   | chr19:7733906   | Wald ratio                | 1  | 0.044  | 0.112 | 6.949E-01 | 0.978 | cis | SARS-CoV-2 infection |
| 4962_52   | ARMEL                    | Cerebral dopamine neurotrophic factor                                                       | Q49AH0 | CNDF     | chr10:14838575  | Inverse variance weighted | 6  | 0.009  | 0.022 | 6.955E-01 | 0.978 | cis | SARS-CoV-2 infection |
| 5301_7    | Eotaxin                  | Eotaxin                                                                                     | P51671 | CLL11    | chr17:34285742  | Wald ratio                | 1  | 0.021  | 0.053 | 6.958E-01 | 0.978 | cis | SARS-CoV-2 infection |
| 8479_4    | MMP-10                   | Stromelysin-2                                                                               | P09238 | MMP10    | chr11:102780628 | Inverse variance weighted | 6  | 0.008  | 0.020 | 6.959E-01 | 0.978 | cis | SARS-CoV-2 infection |
| 3004_67   | PD-L2                    | Programmed cell death 1 ligand 2                                                            | Q9BQ51 | PDCD1LG2 | chr9:5510531    | Inverse variance weighted | 5  | -0.008 | 0.021 | 6.965E-01 | 0.978 | cis | SARS-CoV-2 infection |
| 3366_51   | ECM1                     | Extracellular matrix protein 1                                                              | Q16610 | ECM1     | chr1:150508062  | Inverse variance weighted | 12 | -0.004 | 0.011 | 6.971E-01 | 0.978 | cis | SARS-CoV-2 infection |
| 3459_49   | PDGF Rb                  | Platelet-derived growth factor receptor beta                                                | P09619 | PDGFRB   | chr5:150155872  | Inverse variance weighted | 11 | -0.002 | 0.005 | 6.979E-01 | 0.978 | cis | SARS-CoV-2 infection |
| 11214_40  | DNJB9                    | DnaJ homolog subfamily B member 9                                                           | Q9UBS3 | DNABJ9   | chr7:108569867  | Wald ratio                | 1  | -0.042 | 0.109 | 6.981E-01 | 0.978 | cis | SARS-CoV-2 infection |
| 7856_51   | F151A                    | Protein FAM151A                                                                             | Q8WW52 | FAM151A  | chr1:54623556   | Inverse variance weighted | 5  | -0.007 | 0.018 | 7.002E-01 | 0.978 | cis | SARS-CoV-2 infection |
| 8874_53   | CLNS1LD                  | Ceroid-lipofuscinosis neuronal protein 5:Luminal domain                                     | Q75503 | CLN5     | chr13:76990660  | Wald ratio                | 1  | 0.019  | 0.050 | 7.005E-01 | 0.978 | cis | SARS-CoV-2 infection |
| 19377_14  | NOE2                     | Noelin-2                                                                                    | O95897 | OLFM2    | chr19:9936515   | Inverse variance weighted | 6  | -0.005 | 0.013 | 7.013E-01 | 0.978 | cis | SARS-CoV-2 infection |
| 6444_15   | PSG3                     | Pregnancy-specific beta-1-glycoprotein 3                                                    | Q16557 | PSG3     | chr19:42740481  | Inverse variance weighted | 8  | 0.008  | 0.020 | 7.018E-01 | 0.978 | cis | SARS-CoV-2 infection |
| 15339_32  | COF2                     | Cofilin-2                                                                                   | Q9Y281 | CFI2     | chr14:34714823  | Wald ratio                | 1  | -0.016 | 0.042 | 7.021E-01 | 0.978 | cis | SARS-CoV-2 infection |
| 11431_235 | RECQ1                    | ATP-dependent DNA helicase Q1                                                               | P46063 | RECQL    | chr12:21501669  | Inverse variance weighted | 7  | 0.003  | 0.009 | 7.025E-01 | 0.978 | cis | SARS-CoV-2 infection |
| 8303_102  | MYG1                     | UPF0160 protein MYG1, mitochondrial                                                         | Q9HB07 | MYG1     | chr12:53299695  | Wald ratio                | 1  | -0.025 | 0.066 | 7.030E-01 | 0.978 | cis | SARS-CoV-2 infection |
| 4480_59   | C3b                      | Complement C3b                                                                              | P01024 | C3       | chr19:6730562   | Wald ratio                | 1  | -0.042 | 0.110 | 7.030E-01 | 0.978 | cis | SARS-CoV-2 infection |
| 16307_22  | UNC5H4                   | Netrin receptor UNC5D                                                                       | Q6UXZ4 | UNC5D    | chr8:35235475   | Inverse variance weighted | 3  | 0.013  | 0.035 | 7.032E-01 | 0.978 | cis | SARS-CoV-2 infection |
| 9297_12   | B3GN8                    | UDP-GlcNAc:betaGal beta-1,3-N-acetylglucosaminyltransferase 8                               | Q7Z7M8 | B3GN78   | chr19:41428730  | Inverse variance weighted | 6  | 0.004  | 0.010 | 7.036E-01 | 0.978 | cis | SARS-CoV-2 infection |
| 7999_23   | CD39                     | Ectonucleoside triphosphate diphosphohydrolase 1                                            | P49961 | ENTPD1   | chr10:95711779  | Inverse variance weighted | 3  | -0.011 | 0.028 | 7.038E-01 | 0.978 | cis | SARS-CoV-2 infection |
| 10339_48  | NSE                      | Gamma-enolase                                                                               | P09104 | ENO2     | chr12:6913745   | Wald ratio                | 1  | 0.016  | 0.043 | 7.047E-01 | 0.978 | cis | SARS-CoV-2 infection |
| 8327_26   | DPEP2                    | Dipeptidase 2                                                                               | Q9H4A9 | DPEP2    | chr16:68000586  | Inverse variance weighted | 2  | 0.012  | 0.032 | 7.048E-01 | 0.978 | cis | SARS-CoV-2 infection |
| 6990_44   | SDF2L                    | Stromal cell-derived factor 2-like protein 1                                                | Q9HCN8 | SDF2L1   | chr22:21642302  | Wald ratio                | 1  | -0.035 | 0.094 | 7.060E-01 | 0.978 | cis | SARS-CoV-2 infection |
| 11696_7   | RABP2                    | Cellular retinoic acid-binding protein 2                                                    | P29373 | CRABP2   | chr1:156705816  | Inverse variance weighted | 3  | -0.006 | 0.017 | 7.076E-01 | 0.978 | cis | SARS-CoV-2 infection |
| 15305_7   | Secretagogin             | Secretagogin                                                                                | O76038 | SCGN     | chr6:25652201   | Inverse variance weighted | 2  | -0.025 | 0.066 | 7.078E-01 | 0.978 | cis | SARS-CoV-2 infection |
| 9829_91   | SULT 2A1                 | Bile salt sulfotransferase                                                                  | Q06520 | SULT2A1  | chr19:47886315  | Wald ratio                | 1  | -0.011 | 0.030 | 7.080E-01 | 0.978 | cis | SARS-CoV-2 infection |
| 5134_52   | TIMD3                    | Hepatitis A virus cellular receptor 2                                                       | Q8TDQ0 | HAVCR2   | chr5:157142869  | Inverse variance weighted | 7  | 0.005  | 0.013 | 7.093E-01 | 0.978 | cis | SARS-CoV-2 infection |
| 3389_7    | PCI                      | Plasma serine protease inhibitor                                                            | P05154 | SERPINA5 | chr14:94561442  | Inverse variance weighted | 2  | -0.025 | 0.066 | 7.093E-01 | 0.978 | cis | SARS-CoV-2 infection |
| 8866_53   | QPCTL                    | Glutaminy-peptide cyclotransferase-like protein                                             | Q9NXS2 | QPCTL    | chr19:45692403  | Inverse variance weighted | 6  | 0.006  | 0.016 | 7.094E-01 | 0.978 | cis | SARS-CoV-2 infection |
| 14088_38  | IGFBP-6                  | Insulin-like growth factor-binding protein 6                                                | P24592 | IGFBP6   | chr12:53097436  | Wald ratio                | 1  | -0.037 | 0.099 | 7.095E-01 | 0.978 | cis | SARS-CoV-2 infection |
| 3009_3    | TGF-b R III              | Transforming growth factor beta receptor type 3                                             | Q03167 | TGFBFR3  | chr1:91906335   | Inverse variance weighted | 2  | -0.017 | 0.045 | 7.097E-01 | 0.978 | cis | SARS-CoV-2 infection |
| 18878_15  | GREM1                    | Gremlin-1                                                                                   | O60565 | GREM1    | chr15:32718004  | Inverse variance weighted | 8  | -0.003 | 0.009 | 7.114E-01 | 0.978 | cis | SARS-CoV-2 infection |
| 16781_2   | ENASE                    | Cytosolic endo-beta-N-acetylglucosaminidase                                                 | Q8NF13 | ENGASE   | chr17:79074824  | Inverse variance weighted | 9  | -0.003 | 0.009 | 7.121E-01 | 0.978 | cis | SARS-CoV-2 infection |
| 10892_8   | OSMR                     | Oncostatin-M-specific receptor subunit beta                                                 | Q99650 | OSMR     | chr5:38845858   | Inverse variance weighted | 2  | 0.036  | 0.098 | 7.126E-01 | 0.978 | cis | SARS-CoV-2 infection |
| 13126_52  | DSC2                     | Desmocollin-2                                                                               | Q02487 | DSC2     | chr18:31102522  | Inverse variance weighted | 4  | -0.011 | 0.031 | 7.136E-01 | 0.978 | cis | SARS-CoV-2 infection |
| 16609_106 | KIR2R                    | Kin of IRRE-like protein 2                                                                  | Q6UWL6 | KIRREL2  | chr19:35855861  | Inverse variance weighted | 6  | 0.006  | 0.017 | 7.145E-01 | 0.978 | cis | SARS-CoV-2 infection |
| 10490_3   | RPN1:CD                  | Dolichyl-diphosphooligosaccharide--protein glycosyltransferase subunit 1:Cytoplasmic domain | Q04843 | RPN1     | chr3:128681075  | Wald ratio                | 1  | -0.011 | 0.031 | 7.145E-01 | 0.978 | cis | SARS-CoV-2 infection |
| 9398_30   | GALP                     | Galanin-like peptide                                                                        | Q9UBC7 | GALP     | chr19:56176008  | Wald ratio                | 1  | -0.030 | 0.083 | 7.166E-01 | 0.978 | cis | SARS-CoV-2 infection |
| 13434_172 | PARVA                    | Alpha-parvin                                                                                | Q9NV07 | PARVA    | chr11:12377563  | Wald ratio                | 1  | -0.022 | 0.060 | 7.167E-01 | 0.978 | cis | SARS-CoV-2 infection |
| 19154_41  | Protease nexin I         | Glia-derived nexin                                                                          | P07093 | SERPINE2 | chr2:224039318  | Inverse variance weighted | 8  | -0.004 | 0.011 | 7.175E-01 | 0.978 | cis | SARS-CoV-2 infection |
| 11313_100 | PHS                      | Pterin-4-alpha-carbinolamine dehydratase                                                    | P61457 | PCBD1    | chr10:70888565  | Inverse variance weighted | 5  | 0.011  | 0.032 | 7.189E-01 | 0.978 | cis | SARS-CoV-2 infection |
| 5456_59   | CNDP1                    | Beta-Ala-His dipeptidase                                                                    | Q96KN2 | CNDP1    | chr18:74534500  | Inverse variance weighted | 6  | -0.007 | 0.018 | 7.189E-01 | 0.978 | cis | SARS-CoV-2 infection |
| 8909_77   | GNP1                     | Glucosamine-6-phosphate isomerase 1                                                         | P46926 | GNPD1A1  | chr5:142013041  | Wald ratio                | 1  | 0.013  | 0.037 | 7.195E-01 | 0.978 | cis | SARS-CoV-2 infection |
| 13488_3   | ARFP1                    | Arfaptin-1                                                                                  | P53367 | ARFP1    | chr4:152779937  | Inverse variance weighted | 3  | -0.014 | 0.039 | 7.202E-01 | 0.978 | cis | SARS-CoV-2 infection |
| 3499_77   | IL-17B                   | Interleukin-17B                                                                             | Q9UHF5 | IL17B    | chr5:149404202  | Wald ratio                | 1  | -0.025 | 0.070 | 7.207E-01 | 0.978 | cis | SARS-CoV-2 infection |
| 19173_5   | ZFAN1                    | AN1-type zinc finger protein 1                                                              | Q8TCF1 | ZFAND1   | chr8:81732903   | Inverse variance weighted | 3  | 0.018  | 0.050 | 7.215E-01 | 0.978 | cis | SARS-CoV-2 infection |
| 19338_3   | LZIC                     | Protein LZIC                                                                                | Q8WZA0 | LZIC     | chr1:9943407    | Wald ratio                | 1  | -0.038 | 0.106 | 7.216E-01 | 0.978 | cis | SARS-CoV-2 infection |
| 10554_23  | BGAL                     | Beta-galactosidase                                                                          | P16278 | GLB1     | chr3:33097202   | Wald ratio                | 1  | 0.039  | 0.109 | 7.224E-01 | 0.978 | cis | SARS-CoV-2 infection |
| 7945_10   | Semaphorin-6A            | Semaphorin-6A                                                                               | Q9H2E6 | SEMA6A   | chr5:116574823  | Inverse variance weighted | 4  | 0.015  | 0.043 | 7.227E-01 | 0.978 | cis | SARS-CoV-2 infection |
| 4407_10   | MSP                      | Hepatocyte growth factor-like protein                                                       | T26927 | MST1     | chr3:49689501   | Inverse variance weighted | 4  | 0.002  | 0.006 | 7.227E-01 | 0.978 | cis | SARS-CoV-2 infection |
| 11516_7   | FABPL                    | Fatty acid-binding protein, liver                                                           | P07148 | FABP1    | chr2:88128062   | Wald ratio                | 1  | -0.016 | 0.044 | 7.231E-01 | 0.978 | cis | SARS-CoV-2 infection |
| 4990_87   | GP1BA                    | Platelet glycoprotein Ib alpha chain                                                        | P07359 | GP1BA    | chr17:4932277   | Inverse variance weighted | 3  | -0.011 | 0.030 | 7.232E-01 | 0.978 | cis | SARS-CoV-2 infection |
| 2962_50   | PTHrP                    | Parathyroid hormone-related protein                                                         | P12272 | PTHUH    | chr12:27972733  | Inverse variance weighted | 3  | 0.012  | 0.035 | 7.243E-01 | 0.978 | cis | SARS-CoV-2 infection |
| 8970_9    | RIPK2                    | Receptor-interacting serine/threonine-protein kinase 2                                      | O43353 | RIPK2    | chr8:89757806   | Wald ratio                | 1  | 0.029  | 0.083 | 7.251E-01 | 0.978 | cis | SARS-CoV-2 infection |
| 15587_20  | FOLR2                    | Folate receptor beta                                                                        | P14207 | FOLR2    | chr11:72216601  | Wald ratio                | 1  | -0.018 | 0.051 | 7.257E-01 | 0.978 | cis | SARS-CoV-2 infection |
| 18206_18  | ADH6                     | Alcohol dehydrogenase 6                                                                     | T28332 | ADH6     | chr4:99219537   | Wald ratio                | 1  | -0.026 | 0.075 | 7.261E-01 | 0.978 | cis | SARS-CoV-2 infection |
| 12436_84  | GST omega-1              | Glutathione S-transferase omega-1                                                           | P78417 | GSTO1    | chr10:104235356 | Inverse variance weighted | 8  | -0.004 | 0.012 | 7.271E-01 | 0.978 | cis | SARS-CoV-2 infection |
| 15304_1   | PAP1                     | Regenerating islet-derived protein 3-alpha                                                  | Q06141 | REG3A    | chr2:79159753   | Inverse variance weighted | 3  | -0.020 | 0.057 | 7.272E-01 | 0.978 | cis | SARS-CoV-2 infection |
| 2944_66   | DAN                      | Neuroblastoma suppressor of tumorigenicity 1                                                | P41271 | NBL1     | chr1:19596979   | Wald ratio                | 1  | 0.032  | 0.092 | 7.272E-01 | 0.978 | cis | SARS-CoV-2 infection |
| 3298_52   | Contactin-4              | Contactin-4                                                                                 | Q8IIV2 | CNTN4    | chr3:2098813    | Inverse variance weighted | 8  | -0.005 | 0.013 | 7.273E-01 | 0.978 | cis | SARS-CoV-2 infection |
| 2567_5    | Factor I                 | Complement factor I                                                                         | P05156 | CFI      | chr4:109802150  | Inverse variance weighted | 2  | -0.008 | 0.023 | 7.274E-01 | 0.978 | cis | SARS-CoV-2 infection |
| 6366_38   | TXD15                    | Thioredoxin domain-containing protein 15                                                    | Q96J42 | TXND15   | chr5:134874371  | Inverse variance weighted | 3  | 0.005  | 0.014 | 7.279E-01 | 0.978 | cis | SARS-CoV-2 infection |
| 12727_7   | FRPR                     | Prostaglandin F2 receptor negative regulator                                                | Q9P282 | PTGFRN   | chr1:116909916  | Inverse variance weighted | 8  | -0.005 | 0.014 | 7.287E-01 | 0.978 | cis | SARS-CoV-2 infection |
| 18236_3   | LEGL                     | Galectin-related protein                                                                    | Q3ZCW2 | LGALS1   | chr2:64453969   | Wald ratio                | 1  | -0.022 | 0.064 | 7.291E-01 | 0.978 | cis | SARS-CoV-2 infection |
| 3025_50   | bFGF                     | Fibroblast growth factor 2                                                                  | P09038 | FGF2     | chr4:122826682  | Inverse variance weighted | 6  | 0.005  | 0.014 | 7.299E-01 | 0.978 | cis | SARS-CoV-2 infection |
| 13094_75  | RSPO3                    | R-spondin-3                                                                                 | Q9BXK4 | RSPO3    | chr6:127118671  | Wald ratio                | 1  | -0.026 | 0.076 | 7.305E-01 | 0.978 | cis | SARS-CoV-2 infection |
| 2973_15   | CD36 ANTIGEN             | Platelet glycoprotein 4                                                                     | P16671 | CD36     | chr7:80369575   | Inverse variance weighted | 4  | -0.008 | 0.023 | 7.311E-01 | 0.978 | cis | SARS-CoV-2 infection |
| 2888_49   | C7                       | Complement component C7                                                                     | P10643 | C7       | chr5:40909492   | Inverse variance weighted | 5  | -0.003 | 0.008 | 7.321E-01 | 0.978 | cis | SARS-CoV-2 infection |
| 18380_78  | Albumin                  | Serum albumin                                                                               | P02768 | ALB      | chr4:73397114   | Wald ratio                | 1  | 0.027  | 0.078 | 7.323E-01 | 0.978 | cis | SARS-CoV-2 infection |
| 15589_1   | Gc-Globulin, Mixed Type  | Vitamin D-binding protein                                                                   | P02774 | GC       | chr4:71804041   | Inverse variance weighted | 2  | -0.012 | 0.036 | 7.324E-01 | 0.978 | cis | SARS-CoV-2 infection |
| 8982_65   | TSP3                     | Thrombospondin-3                                                                            | P49746 | THBS3    | chr1:155209051  | Inverse variance weighted | 3  | -0.037 | 0.107 | 7.328E-01 | 0.978 | cis | SARS-CoV-2 infection |
| 4969_2    | Carbonic anhydrase I     | Carbonic anhydrase 1                                                                        | P00915 | CA1      | chr8:85379014   | Inverse variance weighted | 3  | -0.015 | 0.045 | 7.338E-01 | 0.978 | cis | SARS-CoV-2 infection |
| 19153_53  | MPPD2                    | Metallophosphoesterase MPPD2                                                                | Q15777 | MPPD2    | chr11:30586872  | Inverse variance weighted | 2  | 0.033  | 0.096 | 7.340E-01 | 0.978 | cis | SARS-CoV-2 infection |

|           |                             |                                                                            |        |          |                 |                           |   |        |       |           |       |     |                      |
|-----------|-----------------------------|----------------------------------------------------------------------------|--------|----------|-----------------|---------------------------|---|--------|-------|-----------|-------|-----|----------------------|
| 8890_9    | T132B                       | Transmembrane protein 132B                                                 | Q14DG7 | TMEM132B | chr12:125186386 | Inverse variance weighted | 2 | -0.010 | 0.030 | 7.342E-01 | 0.978 | cis | SARS-CoV-2 infection |
| 9337_43   | TKN1                        | Protachykinin-1                                                            | P20366 | TAC1     | chr7:97732084   | Inverse variance weighted | 3 | -0.008 | 0.023 | 7.345E-01 | 0.978 | cis | SARS-CoV-2 infection |
| 9950_229  | LAG-3                       | Lymphocyte activation gene 3 protein                                       | P18627 | LAG3     | chr12:6772512   | Inverse variance weighted | 2 | -0.012 | 0.035 | 7.349E-01 | 0.978 | cis | SARS-CoV-2 infection |
| 9211_19   | PEDF                        | Pigment epithelium-derived factor                                          | P36955 | SERPINF1 | chr17:1762029   | Inverse variance weighted | 4 | 0.008  | 0.023 | 7.354E-01 | 0.978 | cis | SARS-CoV-2 infection |
| 5404_53   | DR6                         | Tumor necrosis factor receptor superfamily member 21                       | Q75509 | TNFRSF21 | chr6:47309905   | Inverse variance weighted | 2 | -0.020 | 0.060 | 7.369E-01 | 0.978 | cis | SARS-CoV-2 infection |
| 14048_7   | IL-1 R AcP                  | Interleukin-1 Receptor accessory protein                                   | Q9NPH3 | IL1RAP   | chr3:190514051  | Inverse variance weighted | 6 | -0.002 | 0.007 | 7.376E-01 | 0.978 | cis | SARS-CoV-2 infection |
| 5728_60   | FCRL1                       | Fc receptor-like protein 1                                                 | Q96LA6 | FCRL1    | chr1:157820120  | Inverse variance weighted | 4 | -0.012 | 0.037 | 7.393E-01 | 0.978 | cis | SARS-CoV-2 infection |
| 8900_28   | NEO1                        | Neogenin                                                                   | Q92859 | NEO1     | chr15:73051710  | Inverse variance weighted | 3 | 0.012  | 0.036 | 7.399E-01 | 0.978 | cis | SARS-CoV-2 infection |
| 2994_71   | IL-1Rrp2                    | Interleukin-1 receptor-like 2                                              | Q9HB29 | IL1RL2   | chr2:102187006  | Wald ratio                | 1 | -0.012 | 0.035 | 7.400E-01 | 0.978 | cis | SARS-CoV-2 infection |
| 2816_50   | BCAM                        | Basal Cell Adhesion Molecule                                               | P50895 | BCAM     | chr19:44809071  | Inverse variance weighted | 5 | 0.006  | 0.019 | 7.404E-01 | 0.978 | cis | SARS-CoV-2 infection |
| 18337_4   | GMD5                        | GDP-mannose 4,6 dehydratase                                                | O60547 | GMD5     | chr6:2245605    | Wald ratio                | 1 | -0.030 | 0.091 | 7.409E-01 | 0.978 | cis | SARS-CoV-2 infection |
| 9223_11   | ARMET                       | Mesencephalic astrocyte-derived neurotrophic factor                        | P55145 | MANF     | chr3:51385291   | Wald ratio                | 1 | -0.037 | 0.112 | 7.412E-01 | 0.978 | cis | SARS-CoV-2 infection |
| 17685_9   | Apo A-IV                    | Apolipoprotein A-IV                                                        | P06727 | APOA4    | chr11:116823304 | Wald ratio                | 1 | -0.033 | 0.099 | 7.413E-01 | 0.978 | cis | SARS-CoV-2 infection |
| 19237_17  | D-dopachrome decarboxylase  | D-dopachrome decarboxylase                                                 | P30046 | DDT      | chr22:23980525  | Inverse variance weighted | 2 | 0.012  | 0.037 | 7.420E-01 | 0.978 | cis | SARS-CoV-2 infection |
| 9177_6    | FAM3B                       | Protein FAM3B                                                              | P58499 | FAM3B    | chr21:41304212  | Inverse variance weighted | 7 | -0.009 | 0.026 | 7.435E-01 | 0.978 | cis | SARS-CoV-2 infection |
| 3449_58   | Kallistatin                 | Kallistatin                                                                | P29622 | SERPINA4 | chr14:94561442  | Inverse variance weighted | 7 | 0.006  | 0.018 | 7.436E-01 | 0.978 | cis | SARS-CoV-2 infection |
| 13465_5   | CCP1                        | Calciopressin-1                                                            | P53805 | RCAN1    | chr21:34615113  | Wald ratio                | 1 | 0.026  | 0.079 | 7.440E-01 | 0.978 | cis | SARS-CoV-2 infection |
| 12635_9   | TRDMT                       | tRNA (cytosine(38)-C(5))-methyltransferase                                 | O14717 | TRDMT1   | chr10:17202054  | Inverse variance weighted | 4 | -0.011 | 0.033 | 7.445E-01 | 0.978 | cis | SARS-CoV-2 infection |
| 15530_33  | EphB4                       | Ephrin type-B receptor 4                                                   | P54760 | EPHB4    | chr7:100827523  | Wald ratio                | 1 | -0.020 | 0.061 | 7.448E-01 | 0.978 | cis | SARS-CoV-2 infection |
| 7968_15   | CRTAM                       | Cytotoxic and regulatory T-cell molecule                                   | O95727 | CRTAM    | chr11:122838500 | Inverse variance weighted | 6 | -0.008 | 0.026 | 7.458E-01 | 0.978 | cis | SARS-CoV-2 infection |
| 3299_29   | Contactin-5                 | Contactin-5                                                                | O94779 | CNTN5    | chr11:99020949  | Inverse variance weighted | 3 | -0.009 | 0.029 | 7.460E-01 | 0.978 | cis | SARS-CoV-2 infection |
| 18895_54  | GSTM4                       | Glutathione S-transferase Mu 4                                             | Q03013 | GSTM4    | chr1:109656099  | Inverse variance weighted | 7 | 0.013  | 0.039 | 7.464E-01 | 0.978 | cis | SARS-CoV-2 infection |
| 15298_199 | NETO1                       | Neuropilin and tolloid-like protein 1                                      | Q8TDF5 | NETO1    | chr18:72868146  | Inverse variance weighted | 2 | 0.022  | 0.068 | 7.471E-01 | 0.978 | cis | SARS-CoV-2 infection |
| 15470_11  | Hexosaminidase B            | Beta-hexosaminidase subunit beta                                           | P07686 | HEXB     | chr5:74640023   | Inverse variance weighted | 4 | 0.006  | 0.018 | 7.482E-01 | 0.978 | cis | SARS-CoV-2 infection |
| 3172_28   | ARSB                        | Arylsulfatase B                                                            | P15848 | ARSB     | chr5:78986087   | Inverse variance weighted | 2 | -0.011 | 0.033 | 7.494E-01 | 0.978 | cis | SARS-CoV-2 infection |
| 7806_33   | B4GT7                       | Beta-1,4-galactosyltransferase 7                                           | Q9UBV7 | B4GALT7  | chr5:177600132  | Inverse variance weighted | 7 | -0.005 | 0.017 | 7.496E-01 | 0.978 | cis | SARS-CoV-2 infection |
| 6493_9    | CBPZ                        | Carboxypeptidase Z                                                         | Q66K79 | CPZ      | chr4:8592660    | Inverse variance weighted | 2 | -0.016 | 0.050 | 7.496E-01 | 0.978 | cis | SARS-CoV-2 infection |
| 12563_2   | TFIP8                       | Tumor necrosis factor alpha-induced protein 8                              | O95379 | TNFAIP8  | chr5:119268692  | Inverse variance weighted | 2 | 0.009  | 0.030 | 7.496E-01 | 0.978 | cis | SARS-CoV-2 infection |
| 12348_46  | SYSM                        | Serine-tRNA ligase, mitochondrial                                          | Q9NP81 | SARS2    | chr19:38930763  | Wald ratio                | 1 | -0.014 | 0.043 | 7.509E-01 | 0.978 | cis | SARS-CoV-2 infection |
| 15613_16  | LUPP                        | Pancreatic triacylglycerol lipase                                          | P16233 | PNLIP    | chr10:116545931 | Wald ratio                | 1 | -0.026 | 0.083 | 7.509E-01 | 0.978 | cis | SARS-CoV-2 infection |
| 18401_18  | ALKB3                       | Alpha-ketoglutarate-dependent dioxygenase alkb homolog 3                   | Q96Q83 | ALKBH3   | chr11:43880811  | Inverse variance weighted | 3 | -0.007 | 0.022 | 7.527E-01 | 0.978 | cis | SARS-CoV-2 infection |
| 16620_26  | LY75                        | Lymphocyte antigen 75                                                      | O60449 | LY75     | chr2:155904756  | Inverse variance weighted | 7 | 0.003  | 0.011 | 7.528E-01 | 0.978 | cis | SARS-CoV-2 infection |
| 8346_9    | DPP2                        | Dipeptidyl peptidase 2                                                     | Q9UHL4 | DPP7     | chr9:137118309  | Inverse variance weighted | 8 | 0.005  | 0.015 | 7.538E-01 | 0.978 | cis | SARS-CoV-2 infection |
| 9359_9    | EGFL9                       | Protein delta homolog 2                                                    | Q6UY11 | DLK2     | chr6:43456632   | Wald ratio                | 1 | -0.009 | 0.029 | 7.539E-01 | 0.978 | cis | SARS-CoV-2 infection |
| 18162_167 | IRAK4                       | Interleukin-1 receptor-associated kinase 4                                 | Q9NW23 | IRAK4    | chr12:43758944  | Wald ratio                | 1 | -0.020 | 0.063 | 7.557E-01 | 0.978 | cis | SARS-CoV-2 infection |
| 5682_13   | VASN                        | Vasorin                                                                    | Q6EMK4 | VASN     | chr16:4371848   | Wald ratio                | 1 | 0.021  | 0.068 | 7.562E-01 | 0.978 | cis | SARS-CoV-2 infection |
| 7994_41   | ERO1B                       | ERO1-like protein beta                                                     | Q86V88 | ERO1B    | chr1:236282019  | Inverse variance weighted | 2 | -0.010 | 0.031 | 7.567E-01 | 0.978 | cis | SARS-CoV-2 infection |
| 12333_87  | RP1A                        | Ribose-5-phosphate isomerase                                               | P49247 | RP1A     | chr2:88691673   | Inverse variance weighted | 2 | -0.010 | 0.032 | 7.573E-01 | 0.978 | cis | SARS-CoV-2 infection |
| 2635_61   | Layilin                     | Layilin                                                                    | Q6UX15 | LAYN     | chr11:111540280 | Wald ratio                | 1 | -0.028 | 0.090 | 7.573E-01 | 0.978 | cis | SARS-CoV-2 infection |
| 15308_108 | VWC2                        | Brorin                                                                     | Q2TAL6 | VWC2     | chr7:49773638   | Inverse variance weighted | 7 | -0.004 | 0.014 | 7.575E-01 | 0.978 | cis | SARS-CoV-2 infection |
| 8398_277  | RAR-responsive protein TIG1 | Retinoic acid receptor responder protein 1                                 | P49788 | RARRES1  | chr3:158732489  | Inverse variance weighted | 6 | -0.003 | 0.009 | 7.576E-01 | 0.978 | cis | SARS-CoV-2 infection |
| 10442_1   | TM190                       | Transmembrane protein 190                                                  | Q8WZ59 | TMEM190  | chr19:55376826  | Inverse variance weighted | 9 | 0.004  | 0.014 | 7.577E-01 | 0.978 | cis | SARS-CoV-2 infection |
| 7206_20   | F16P1                       | Fructose-1,6-bisphosphatase 1                                              | P09467 | FBP1     | chr9:94640249   | Inverse variance weighted | 2 | 0.024  | 0.077 | 7.578E-01 | 0.978 | cis | SARS-CoV-2 infection |
| 4867_15   | VEGF121                     | Vascular endothelial growth factor A, isoform 121                          | P15692 | VEGFA    | chr6:43770184   | Inverse variance weighted | 4 | 0.015  | 0.049 | 7.589E-01 | 0.978 | cis | SARS-CoV-2 infection |
| 4437_56   | ENTP5                       | Ectonucleoside triphosphate diphosphohydrolase 5                           | O75356 | ENTPD5   | chr14:74019399  | Inverse variance weighted | 8 | -0.004 | 0.012 | 7.595E-01 | 0.978 | cis | SARS-CoV-2 infection |
| 5087_5    | IL-22BP                     | Interleukin-22 receptor subunit alpha-2                                    | Q969Y5 | IL22RA2  | chr6:137173648  | Inverse variance weighted | 5 | -0.007 | 0.022 | 7.599E-01 | 0.978 | cis | SARS-CoV-2 infection |
| 10565_19  | SLIK3                       | SLIT and NTRK-like protein 3                                               | O94933 | SLITRK3  | chr3:165197109  | Inverse variance weighted | 3 | -0.005 | 0.015 | 7.600E-01 | 0.978 | cis | SARS-CoV-2 infection |
| 4152_58   | Prekallikrein               | Plasma kallikrein                                                          | P03952 | KLKB1    | chr4:186226438  | Inverse variance weighted | 4 | -0.006 | 0.019 | 7.603E-01 | 0.978 | cis | SARS-CoV-2 infection |
| 16828_8   | Collagen a1(VI)             | Collagen alpha-1(VI) chain                                                 | P12109 | COL6A1   | chr21:45981770  | Inverse variance weighted | 9 | -0.003 | 0.009 | 7.604E-01 | 0.978 | cis | SARS-CoV-2 infection |
| 9380_2    | sPLA2)-XIII                 | Group XIIb secretory phospholipase A2-like protein                         | Q9BX93 | PLA2G12B | chr10:72954806  | Wald ratio                | 1 | -0.017 | 0.055 | 7.617E-01 | 0.978 | cis | SARS-CoV-2 infection |
| 7211_2    | RNase 1                     | Ribonuclease pancreatic                                                    | P07998 | RNASE1   | chr14:20802855  | Inverse variance weighted | 4 | -0.019 | 0.062 | 7.618E-01 | 0.978 | cis | SARS-CoV-2 infection |
| 5103_30   | MOZ1L:ECD                   | Cell surface glycoprotein CD200 receptor 1:isoform 4, Extracellular Domain | Q8TD46 | CD200R1  | chr3:112975103  | Wald ratio                | 1 | 0.013  | 0.044 | 7.620E-01 | 0.978 | cis | SARS-CoV-2 infection |
| 8989_40   | SCUB1                       | Signal peptide, CUB and EGF-like domain-containing protein 1               | Q8IWY4 | SCUBE1   | chr22:43343372  | Inverse variance weighted | 4 | -0.009 | 0.030 | 7.620E-01 | 0.978 | cis | SARS-CoV-2 infection |
| 5736_1    | TRML2                       | Trem-like transcript 2 protein                                             | Q5T2D2 | TREML2   | chr6:41201149   | Inverse variance weighted | 5 | 0.004  | 0.013 | 7.628E-01 | 0.978 | cis | SARS-CoV-2 infection |
| 4232_19   | IGF-1 sR                    | Insulin-like growth factor 1 receptor                                      | P08069 | IGF1R    | chr15:98648539  | Inverse variance weighted | 2 | 0.013  | 0.042 | 7.631E-01 | 0.978 | cis | SARS-CoV-2 infection |
| 9383_24   | CH3L2                       | Chitinase-3-like protein 2                                                 | Q15782 | CHI3L2   | chr1:111200771  | Wald ratio                | 1 | -0.025 | 0.082 | 7.633E-01 | 0.978 | cis | SARS-CoV-2 infection |
| 5231_79   | PCSK9                       | Proprotein convertase subtilisin/kexin type 9                              | Q8NB97 | PCSK9    | chr1:55039447   | Inverse variance weighted | 6 | 0.005  | 0.018 | 7.637E-01 | 0.978 | cis | SARS-CoV-2 infection |
| 12571_14  | ARL3                        | ADP-ribosylation factor-like protein 3                                     | P36405 | ARL3     | chr10:102714397 | Inverse variance weighted | 2 | -0.009 | 0.031 | 7.641E-01 | 0.978 | cis | SARS-CoV-2 infection |
| 19590_46  | SP-D                        | Pulmonary surfactant-associated protein D                                  | P35247 | SFTPD    | chr10:79982614  | Inverse variance weighted | 7 | -0.005 | 0.018 | 7.644E-01 | 0.978 | cis | SARS-CoV-2 infection |
| 5867_60   | ARGI1                       | Arginase-1                                                                 | P05089 | ARGI1    | chr6:131470832  | Inverse variance weighted | 2 | 0.014  | 0.046 | 7.650E-01 | 0.978 | cis | SARS-CoV-2 infection |
| 11377_19  | ADH7                        | Alcohol dehydrogenase class 4 mu/sigma chain                               | P40394 | ADH7     | chr4:99435510   | Inverse variance weighted | 3 | -0.005 | 0.017 | 7.657E-01 | 0.978 | cis | SARS-CoV-2 infection |
| 2278_61   | TIMP-2                      | Metalloproteinase inhibitor 2                                              | P16035 | TIMP2    | chr17:78925387  | Wald ratio                | 1 | 0.021  | 0.071 | 7.660E-01 | 0.978 | cis | SARS-CoV-2 infection |
| 10514_5   | PGD2 synthase               | Prostaglandin-H2 D-isomerase                                               | P41222 | PTGD5    | chr9:136975092  | Wald ratio                | 1 | 0.031  | 0.105 | 7.661E-01 | 0.978 | cis | SARS-CoV-2 infection |
| 3184_25   | Coagulation Factor VII      | Coagulation factor VII                                                     | P08709 | F7       | chr13:113105788 | Inverse variance weighted | 7 | 0.003  | 0.010 | 7.674E-01 | 0.978 | cis | SARS-CoV-2 infection |
| 16583_8   | AP4A                        | Bis(5'-nucleosyl)-tetrakisphosphate [asymmetrical]                         | P50583 | NUDT2    | chr9:34329506   | Inverse variance weighted | 7 | 0.010  | 0.033 | 7.682E-01 | 0.978 | cis | SARS-CoV-2 infection |
| 19117_3   | PP14A                       | Protein phosphatase 1 regulatory subunit 14A                               | Q96A00 | PPP1R14A | chr19:38256532  | Wald ratio                | 1 | 0.025  | 0.085 | 7.690E-01 | 0.978 | cis | SARS-CoV-2 infection |
| 8394_56   | RNase 2                     | Non-secretory ribonuclease                                                 | P10153 | RNASE2   | chr14:20955487  | Wald ratio                | 1 | -0.018 | 0.060 | 7.691E-01 | 0.978 | cis | SARS-CoV-2 infection |
| 2692_74   | NPS-PLA2                    | Phospholipase A2, membrane associated                                      | P14555 | PLA2G2A  | chr1:19980416   | Inverse variance weighted | 6 | 0.003  | 0.009 | 7.696E-01 | 0.978 | cis | SARS-CoV-2 infection |
| 15435_4   | PNP                         | Purine nucleoside phosphorylase                                            | P00491 | PNP      | chr14:20461992  | Inverse variance weighted | 2 | -0.009 | 0.032 | 7.700E-01 | 0.978 | cis | SARS-CoV-2 infection |
| 9964_10   | MYZAP                       | Mycardial zonula adherens protein                                          | P0CA11 | MYZAP    | chr15:57591904  | Wald ratio                | 1 | 0.021  | 0.073 | 7.706E-01 | 0.978 | cis | SARS-CoV-2 infection |
| 15475_4   | PLTP                        | Phospholipid transfer protein                                              | P55058 | PLTP     | chr20:45912155  | Inverse variance weighted | 9 | -0.005 | 0.016 | 7.712E-01 | 0.978 | cis | SARS-CoV-2 infection |
| 4162_54   | Transferrin                 | Serotransferrin                                                            | P02787 | TF       | chr3:133746040  | Inverse variance weighted | 2 | 0.009  | 0.030 | 7.717E-01 | 0.978 | cis | SARS-CoV-2 infection |
| 11493_169 | DYL2                        | Dynein light chain 2, cytoplasmic                                          | Q96FJ2 | DYNLL2   | chr17:58083419  | Wald ratio                | 1 | -0.027 | 0.092 | 7.725E-01 | 0.978 | cis | SARS-CoV-2 infection |
| 2855_49   | ERK-1                       | Mitogen-activated protein kinase 3                                         | P27361 | MAPK3    | chr16:30123506  | Inverse variance weighted | 3 | -0.020 | 0.070 | 7.726E-01 | 0.978 | cis | SARS-CoV-2 infection |
| 18396_10  | AES                         | Amino-terminal enhancer of split                                           | Q08117 | TLE5     | chr19:3063107   | Wald ratio                | 1 | -0.028 | 0.097 | 7.733E-01 | 0.978 | cis | SARS-CoV-2 infection |
| 11390_24  | Carbonic Anhydrase VIII     | Carbonic anhydrase-related protein                                         | P35219 | CAB      | chr8:60281400   | Inverse variance weighted | 6 | 0.004  | 0.012 | 7.739E-01 | 0.978 | cis | SARS-CoV-2 infection |
| 6393_63   | Endoplasmic                 | Endoplasmic                                                                | P14625 | HSP90B1  | chr12:103930107 | Inverse variance weighted | 6 | 0.002  | 0.008 | 7.740E-01 | 0.978 | cis | SARS-CoV-2 infection |
| 5680_54   | OBP2B                       | Odorant-binding protein 2b                                                 | Q9NPH6 | OBP2B    | chr9:133209250  | Inverse variance weighted | 4 | -0.007 | 0.026 | 7.741E-01 | 0.978 | cis | SARS-CoV-2 infection |

|           |                                  |                                                             |        |          |                 |                           |    |        |       |           |       |     |                      |
|-----------|----------------------------------|-------------------------------------------------------------|--------|----------|-----------------|---------------------------|----|--------|-------|-----------|-------|-----|----------------------|
| 19446_1   | GMPR2                            | GMP reductase 2                                             | Q9P2T1 | GMPR2    | chr14:24232422  | Inverse variance weighted | 3  | 0.003  | 0.010 | 7.764E-01 | 0.978 | cis | SARS-CoV-2 infection |
| 16322_10  | PACAP                            | Marginal zone B- and B1-cell-specific protein               | Q8WU39 | MZB1     | chr5:139390081  | Inverse variance weighted | 3  | -0.012 | 0.041 | 7.767E-01 | 0.978 | cis | SARS-CoV-2 infection |
| 17396_23  | ADH1A                            | Alcohol dehydrogenase 1A                                    | P07327 | ADH1A    | chr4:99291003   | Wald ratio                | 1  | -0.013 | 0.045 | 7.768E-01 | 0.978 | cis | SARS-CoV-2 infection |
| 16323_8   | NRX3A                            | Neurexin-3                                                  | Q9Y4C0 | NRXN3    | chr14:78170373  | Wald ratio                | 1  | -0.029 | 0.101 | 7.768E-01 | 0.978 | cis | SARS-CoV-2 infection |
| 18422_41  | ERG19                            | Diphosphomevalonate decarboxylase                           | P53602 | MVD      | chr16:88663161  | Inverse variance weighted | 2  | 0.022  | 0.076 | 7.777E-01 | 0.978 | cis | SARS-CoV-2 infection |
| 15452_5   | 5'-Nucleotidase                  | 5'-Nucleotidase                                             | P21589 | NTSE     | chr6:85449584   | Inverse variance weighted | 4  | 0.004  | 0.013 | 7.783E-01 | 0.978 | cis | SARS-CoV-2 infection |
| 4831_4    | sL-Selectin                      | L-Selectin                                                  | P14151 | SELL     | chr1:169711702  | Inverse variance weighted | 7  | 0.003  | 0.012 | 7.786E-01 | 0.978 | cis | SARS-CoV-2 infection |
| 2946_52   | Factor D                         | Complement factor D                                         | P00746 | CFD      | chr19:859453    | Inverse variance weighted | 6  | -0.007 | 0.023 | 7.793E-01 | 0.978 | cis | SARS-CoV-2 infection |
| 9313_27   | CBLN1                            | Cerebellin-1                                                | P23435 | CBLN1    | chr16:49281838  | Inverse variance weighted | 9  | -0.005 | 0.017 | 7.800E-01 | 0.978 | cis | SARS-CoV-2 infection |
| 9765_4    | NDE1                             | Nuclear distribution protein nudE homolog 1                 | Q9NKR1 | NDE1     | chr16:15643267  | Wald ratio                | 1  | 0.019  | 0.069 | 7.803E-01 | 0.978 | cis | SARS-CoV-2 infection |
| 12684_5   | ADSV                             | Adseverin                                                   | Q9Y6U3 | SCIN     | chr7:12570577   | Wald ratio                | 1  | 0.019  | 0.067 | 7.808E-01 | 0.978 | cis | SARS-CoV-2 infection |
| 10627_87  | APLP2                            | Amyloid-like protein 2                                      | Q06481 | APLP2    | chr11:130068147 | Inverse variance weighted | 2  | -0.009 | 0.034 | 7.808E-01 | 0.978 | cis | SARS-CoV-2 infection |
| 8465_52   | Cathepsin H                      | Cathepsin H                                                 | P09668 | CTSH     | chr15:78949574  | Inverse variance weighted | 10 | -0.002 | 0.008 | 7.808E-01 | 0.978 | cis | SARS-CoV-2 infection |
| 5704_74   | Granzyme M                       | Granzyme M                                                  | P51124 | GZMM     | chr19:544034    | Inverse variance weighted | 2  | 0.027  | 0.099 | 7.832E-01 | 0.978 | cis | SARS-CoV-2 infection |
| 14684_17  | CAN2                             | Calpain-2 catalytic subunit                                 | P17655 | CAPN2    | chr1:223701593  | Inverse variance weighted | 3  | 0.008  | 0.029 | 7.833E-01 | 0.978 | cis | SARS-CoV-2 infection |
| 17785_11  | RCL                              | 2'-deoxynucleoside 5'-phosphate N-hydrolase 1               | O43598 | DNPH1    | chr6:43229481   | Wald ratio                | 1  | -0.016 | 0.060 | 7.836E-01 | 0.978 | cis | SARS-CoV-2 infection |
| 12020_39  | PMGE                             | Bisphosphoglycerate mutase                                  | P07738 | BPGM     | chr7:134646811  | Wald ratio                | 1  | 0.034  | 0.125 | 7.837E-01 | 0.978 | cis | SARS-CoV-2 infection |
| 4964_67   | ARTS1                            | Endoplasmic reticulum aminopeptidase 1                      | Q9N208 | ERAP1    | chr5:96808100   | Inverse variance weighted | 5  | -0.003 | 0.010 | 7.850E-01 | 0.978 | cis | SARS-CoV-2 infection |
| 5584_21   | Holo-TC II                       | Holo-Transcobalamin-2                                       | P20062 | TCN2     | chr22:30607003  | Inverse variance weighted | 4  | 0.005  | 0.019 | 7.855E-01 | 0.978 | cis | SARS-CoV-2 infection |
| 2900_53   | HCC-1                            | C-C motif chemokine 14                                      | Q16627 | CCL14    | chr17:35987004  | Inverse variance weighted | 4  | 0.010  | 0.037 | 7.863E-01 | 0.978 | cis | SARS-CoV-2 infection |
| 6049_64   | PTPRS                            | Receptor-tyrosine-protein phosphatase 5                     | Q13332 | PTPRS    | chr19:5340812   | Wald ratio                | 1  | 0.016  | 0.057 | 7.864E-01 | 0.978 | cis | SARS-CoV-2 infection |
| 9793_145  | IGDC4                            | Immunoglobulin superfamily DCC subclass member 4            | Q8TDY8 | IGDC4    | chr15:65422947  | Inverse variance weighted | 7  | -0.005 | 0.017 | 7.876E-01 | 0.978 | cis | SARS-CoV-2 infection |
| 19606_28  | ihh                              | Indian hedgehog protein                                     | Q14623 | IHH      | chr2:219060921  | Inverse variance weighted | 3  | 0.013  | 0.050 | 7.882E-01 | 0.978 | cis | SARS-CoV-2 infection |
| 2705_5    | TECK                             | C-C motif chemokine 25                                      | O15444 | CL25     | chr19:8052318   | Inverse variance weighted | 12 | 0.003  | 0.011 | 7.884E-01 | 0.978 | cis | SARS-CoV-2 infection |
| 10569_28  | MFAP2                            | Microfibrillar-associated protein 2                         | P55001 | MFAP2    | chr1:16980632   | Inverse variance weighted | 4  | 0.025  | 0.094 | 7.888E-01 | 0.978 | cis | SARS-CoV-2 infection |
| 8360_169  | Nkp46                            | Natural cytotoxicity triggering receptor 1                  | O76036 | NCR1     | chr19:54906148  | Wald ratio                | 1  | 0.014  | 0.054 | 7.892E-01 | 0.978 | cis | SARS-CoV-2 infection |
| 7096_30   | RMD1                             | Regulator of microtubule dynamics protein 1                 | Q96D05 | RMDN1    | chr8:86514357   | Inverse variance weighted | 4  | -0.007 | 0.028 | 7.907E-01 | 0.978 | cis | SARS-CoV-2 infection |
| 5121_3    | SEM6B                            | Semaphorin-6B                                               | Q9H3T3 | SEMA6B   | chr19:4581776   | Inverse variance weighted | 2  | -0.015 | 0.056 | 7.907E-01 | 0.978 | cis | SARS-CoV-2 infection |
| 9018_38   | PCD10:ECD                        | Protocadherin-10:Extracellular domain                       | Q9P2E7 | PCDH10   | chr4:133149294  | Inverse variance weighted | 2  | 0.007  | 0.028 | 7.918E-01 | 0.978 | cis | SARS-CoV-2 infection |
| 5275_28   | VAV                              | Proto-oncogene vav                                          | P15498 | VAV1     | chr19:6772708   | Wald ratio                | 1  | -0.022 | 0.084 | 7.924E-01 | 0.978 | cis | SARS-CoV-2 infection |
| 2731_29   | NADPH-P450 Oxidoreductase        | NADPH-cytochrome P450 reductase                             | P16435 | POR      | chr7:75899200   | Inverse variance weighted | 2  | -0.011 | 0.041 | 7.930E-01 | 0.978 | cis | SARS-CoV-2 infection |
| 9468_8    | Lectin, mannose-binding 2        | Vesicular integral-membrane protein VIP36                   | Q12907 | LMAN2    | chr5:177351840  | Wald ratio                | 1  | 0.015  | 0.057 | 7.932E-01 | 0.978 | cis | SARS-CoV-2 infection |
| 7861_9    | ROR2                             | Tyrosine-protein kinase transmembrane receptor ROR2         | Q01974 | ROR2     | chr9:91950228   | Inverse variance weighted | 2  | 0.011  | 0.042 | 7.937E-01 | 0.978 | cis | SARS-CoV-2 infection |
| 15570_99  | Complement receptor type 2       | Complement receptor type 2                                  | P20023 | CR2      | chr1:207453024  | Inverse variance weighted | 3  | -0.008 | 0.032 | 7.943E-01 | 0.978 | cis | SARS-CoV-2 infection |
| 12522_6   | RD23B                            | UV excision repair protein RAD23 homolog B                  | P54727 | RAD23B   | chr19:107283137 | Wald ratio                | 1  | -0.023 | 0.087 | 7.954E-01 | 0.978 | cis | SARS-CoV-2 infection |
| 19161_1   | UBP15                            | Ubiquitin carboxyl-terminal hydrolase 15                    | Q9Y4E8 | USP15    | chr12:62260338  | Inverse variance weighted | 2  | 0.009  | 0.034 | 7.965E-01 | 0.978 | cis | SARS-CoV-2 infection |
| 19236_24  | TCP4                             | Activated RNA polymerase II transcriptional coactivator p15 | P53999 | SUB1     | chr5:32531633   | Wald ratio                | 1  | -0.026 | 0.100 | 7.968E-01 | 0.978 | cis | SARS-CoV-2 infection |
| 8099_42   | SPON2                            | Spodin-2                                                    | Q9BU06 | SPON2    | chr4:1208962    | Inverse variance weighted | 6  | 0.005  | 0.019 | 7.984E-01 | 0.978 | cis | SARS-CoV-2 infection |
| 7050_5    | NEGR1                            | Neuronal growth regulator 1                                 | Q7Z3B1 | NEGR1    | chr1:72282539   | Wald ratio                | 1  | -0.027 | 0.107 | 7.985E-01 | 0.978 | cis | SARS-CoV-2 infection |
| 5637_81   | NTNG1                            | Netrin-G1                                                   | Q9Y212 | NTNG1    | chr1:107140007  | Inverse variance weighted | 9  | -0.003 | 0.012 | 7.986E-01 | 0.978 | cis | SARS-CoV-2 infection |
| 13992_12  | NSF                              | Vesicle-fusing ATPase                                       | P46459 | NSF      | chr17:46590669  | Wald ratio                | 1  | -0.012 | 0.049 | 7.986E-01 | 0.978 | cis | SARS-CoV-2 infection |
| 3340_53   | TSP4                             | Thrombospondin-4                                            | P35443 | THBS4    | chr5:79991311   | Inverse variance weighted | 3  | -0.005 | 0.019 | 7.987E-01 | 0.978 | cis | SARS-CoV-2 infection |
| 15602_43  | IL-6 sRa                         | Interleukin-6 receptor subunit alpha                        | P08887 | IL6R     | chr1:154405193  | Inverse variance weighted | 6  | -0.002 | 0.007 | 7.987E-01 | 0.978 | cis | SARS-CoV-2 infection |
| 13657_2   | PNKP                             | Bifunctional polynucleotide phosphatase/kinase              | Q96760 | PNKP     | chr19:49878351  | Wald ratio                | 1  | 0.012  | 0.047 | 7.992E-01 | 0.978 | cis | SARS-CoV-2 infection |
| 4801_13   | PERL                             | Lactoperoxidase                                             | P22079 | LPO      | chr17:58218548  | Inverse variance weighted | 2  | 0.005  | 0.022 | 7.997E-01 | 0.978 | cis | SARS-CoV-2 infection |
| 3488_64   | Catalase                         | Catalase                                                    | P04040 | CAT      | chr11:34438934  | Inverse variance weighted | 3  | -0.014 | 0.057 | 8.000E-01 | 0.978 | cis | SARS-CoV-2 infection |
| 13943_38  | DPY30                            | Protein dpy-30 homolog                                      | Q9C005 | DPY30    | chr2:32039805   | Wald ratio                | 1  | 0.018  | 0.073 | 8.024E-01 | 0.978 | cis | SARS-CoV-2 infection |
| 15322_35  | CRADD                            | Death domain-containing protein CRADD                       | P78560 | CRADD    | chr12:93677375  | Inverse variance weighted | 2  | 0.031  | 0.124 | 8.032E-01 | 0.978 | cis | SARS-CoV-2 infection |
| 5430_66   | SHPS1                            | Tyrosine-protein phosphatase non-receptor type substrate 1  | P78324 | SIRPA    | chr20:1894167   | Inverse variance weighted | 9  | 0.003  | 0.012 | 8.041E-01 | 0.978 | cis | SARS-CoV-2 infection |
| 7841_84   | ESAM                             | Endothelial cell-selective adhesion molecule                | Q96A97 | ESAM     | chr11:124762290 | Inverse variance weighted | 6  | 0.005  | 0.019 | 8.046E-01 | 0.978 | cis | SARS-CoV-2 infection |
| 5621_64   | THSD1                            | Thrombospondin type-1 domain-containing protein 1           | Q9NS62 | THSD1    | chr13:52416373  | Inverse variance weighted | 4  | 0.003  | 0.014 | 8.053E-01 | 0.978 | cis | SARS-CoV-2 infection |
| 3033_57   | Galectin-2                       | Galectin-2                                                  | P05162 | LGALS2   | chr22:37582616  | Inverse variance weighted | 2  | -0.006 | 0.023 | 8.057E-01 | 0.978 | cis | SARS-CoV-2 infection |
| 15417_3   | Maspin                           | Serpin B5                                                   | P36952 | SERPINF5 | chr18:63476958  | Wald ratio                | 1  | -0.009 | 0.036 | 8.058E-01 | 0.978 | cis | SARS-CoV-2 infection |
| 12687_2   | DECR                             | 2,4-dienoyl-CoA reductase, mitochondrial                    | Q16698 | DECR1    | chr8:90001405   | Inverse variance weighted | 3  | -0.027 | 0.112 | 8.062E-01 | 0.978 | cis | SARS-CoV-2 infection |
| 16614_27  | RSP01                            | R-spondin-1                                                 | Q2MKA7 | RSP01    | chr1:37634892   | Inverse variance weighted | 2  | 0.005  | 0.022 | 8.072E-01 | 0.978 | cis | SARS-CoV-2 infection |
| 8840_61   | C1s                              | Complement C1s subcomponent                                 | P09871 | C1S      | chr12:6988259   | Inverse variance weighted | 4  | 0.010  | 0.042 | 8.079E-01 | 0.978 | cis | SARS-CoV-2 infection |
| 17398_55  | HO-1                             | Heme oxygenase 1                                            | P09601 | HMOX1    | chr22:35380361  | Inverse variance weighted | 3  | -0.011 | 0.046 | 8.090E-01 | 0.978 | cis | SARS-CoV-2 infection |
| 15370_5   | BOLA1                            | BoLA-like protein 1                                         | Q9Y3E2 | BOLA1    | chr1:149887890  | Inverse variance weighted | 2  | 0.004  | 0.018 | 8.092E-01 | 0.978 | cis | SARS-CoV-2 infection |
| 7928_183  | TPST1                            | Protein-tyrosine sulfotransferase 1                         | O60507 | TPST1    | chr7:66205317   | Inverse variance weighted | 2  | -0.004 | 0.016 | 8.098E-01 | 0.978 | cis | SARS-CoV-2 infection |
| 5701_81   | Tetranectin                      | Tetranectin                                                 | P05452 | CLEC3B   | chr3:45001548   | Inverse variance weighted | 2  | -0.006 | 0.026 | 8.100E-01 | 0.978 | cis | SARS-CoV-2 infection |
| 6920_1    | GFRAL                            | GDNF family receptor alpha-like                             | Q6UXV0 | GFRAL    | chr6:55327469   | Inverse variance weighted | 3  | 0.006  | 0.024 | 8.107E-01 | 0.978 | cis | SARS-CoV-2 infection |
| 17791_25  | HPCL1                            | Hippocalcin-like protein 1                                  | P37235 | HPCL1    | chr2:10302889   | Wald ratio                | 1  | -0.015 | 0.064 | 8.119E-01 | 0.978 | cis | SARS-CoV-2 infection |
| 4187_49   | 6-Phosphogluconate dehydrogenase | 6-phosphogluconate dehydrogenase, decarboxylating           | P52209 | PGD      | chr1:10398592   | Wald ratio                | 1  | 0.015  | 0.065 | 8.124E-01 | 0.978 | cis | SARS-CoV-2 infection |
| 13704_5   | HMC52                            | Hydroxymethylglutaryl-CoA synthase, mitochondrial           | P54868 | HMGCS2   | chr1:119768905  | Wald ratio                | 1  | 0.022  | 0.091 | 8.125E-01 | 0.978 | cis | SARS-CoV-2 infection |
| 7218_87   | AT1B2                            | Sodium/potassium-transporting ATPase subunit beta-2         | P14415 | ATP1B2   | chr17:7646627   | Inverse variance weighted | 3  | 0.010  | 0.045 | 8.154E-01 | 0.978 | cis | SARS-CoV-2 infection |
| 3324_51   | LY9                              | T-lymphocyte surface antigen Ly-9                           | Q9HBG7 | LY9      | chr1:160796074  | Inverse variance weighted | 5  | -0.006 | 0.028 | 8.154E-01 | 0.978 | cis | SARS-CoV-2 infection |
| 6431_68   | PCYOX                            | Prenylcysteine oxidase 1                                    | Q9UHG3 | PCYOX1   | chr2:70257386   | Inverse variance weighted | 6  | -0.002 | 0.009 | 8.160E-01 | 0.978 | cis | SARS-CoV-2 infection |
| 2811_27   | Angiopoietin-1                   | Angiopoietin-1                                              | Q15389 | ANGPT1   | chr8:107498055  | Wald ratio                | 1  | -0.016 | 0.071 | 8.162E-01 | 0.978 | cis | SARS-CoV-2 infection |
| 13929_27  | OCTC                             | Peroxisomal carnitine O-octanoyltransferase                 | Q9UKG9 | CROT     | chr7:87345664   | Inverse variance weighted | 6  | -0.003 | 0.014 | 8.173E-01 | 0.978 | cis | SARS-CoV-2 infection |
| 8925_25   | RIR2B                            | Ribonucleoside-diphosphate reductase subunit M2 B           | Q7LG56 | RIRM2B   | chr8:102238961  | Inverse variance weighted | 2  | -0.015 | 0.065 | 8.174E-01 | 0.978 | cis | SARS-CoV-2 infection |
| 19113_66  | SH3L2                            | SH3 domain-binding glutamic acid-rich-like protein 2        | Q9UIJ5 | SH3BGRL2 | chr6:79631329   | Wald ratio                | 1  | 0.011  | 0.046 | 8.178E-01 | 0.978 | cis | SARS-CoV-2 infection |
| 15523_9   | HEM2                             | Delta-aminolevulinic acid dehydratase                       | P13716 | ALAD     | chr9:113401290  | Inverse variance weighted | 7  | 0.004  | 0.020 | 8.185E-01 | 0.978 | cis | SARS-CoV-2 infection |
| 19383_131 | CINP                             | Cyclin-dependent kinase 2-interacting protein               | Q9BW66 | CINP     | chr14:102362916 | Wald ratio                | 1  | 0.021  | 0.091 | 8.193E-01 | 0.978 | cis | SARS-CoV-2 infection |
| 18218_48  | CB032                            | CB1 cannabinoid receptor-interacting protein 1              | Q96FR5 | CNR1P1   | chr2:68320051   | Inverse variance weighted | 7  | 0.003  | 0.012 | 8.195E-01 | 0.978 | cis | SARS-CoV-2 infection |
| 13666_222 | Carbonic Anhydrase X             | Carbonic anhydrase-related protein 10                       | Q9NS85 | CA10     | chr7:52160017   | Inverse variance weighted | 4  | 0.004  | 0.017 | 8.196E-01 | 0.978 | cis | SARS-CoV-2 infection |
| 7099_33   | FSTL5                            | Follistatin-related protein 5                               | Q8N475 | FSTL5    | chr4:162164004  | Wald ratio                | 1  | -0.013 | 0.055 | 8.200E-01 | 0.978 | cis | SARS-CoV-2 infection |
| 15686_49  | INHBC                            | Inhibin beta C chain                                        | P55103 | INHBC    | chr12:57434784  | Inverse variance weighted | 14 | 0.002  | 0.007 | 8.206E-01 | 0.978 | cis | SARS-CoV-2 infection |
| 11543_84  | LIMA1                            | LIM domain and actin-binding protein 1                      | Q9UH86 | LIMA1    | chr12:50283520  | Wald ratio                | 1  | -0.017 | 0.077 | 8.217E-01 | 0.978 | cis | SARS-CoV-2 infection |

|           |                          |                                                                          |        |           |                 |                           |    |        |       |           |       |     |                      |
|-----------|--------------------------|--------------------------------------------------------------------------|--------|-----------|-----------------|---------------------------|----|--------|-------|-----------|-------|-----|----------------------|
| 9360_33   | EDIL3                    | EGF-like repeat and discoidin I-like domain-containing protein 3         | O43854 | EDIL3     | chr5:84384880   | Inverse variance weighted | 2  | 0.013  | 0.060 | 8.218E-01 | 0.978 | cis | SARS-CoV-2 infection |
| 16015_19  | ALT                      | Alanine aminotransferase 1                                               | P24298 | GPT       | chr8:144502973  | Wald ratio                | 1  | 0.021  | 0.092 | 8.224E-01 | 0.978 | cis | SARS-CoV-2 infection |
| 12411_60  | MAX                      | Protein max                                                              | P61244 | MAX       | chr14:65102695  | Wald ratio                | 1  | -0.006 | 0.027 | 8.229E-01 | 0.978 | cis | SARS-CoV-2 infection |
| 6375_75   | XXLT1                    | Xyloside xylosyltransferase 1                                            | Q8N816 | XXYL1     | chr3:195271159  | Inverse variance weighted | 2  | -0.005 | 0.022 | 8.241E-01 | 0.978 | cis | SARS-CoV-2 infection |
| 5316_54   | Prothrombin              | Prothrombin                                                              | P00864 | F2        | chr11:46719196  | Wald ratio                | 1  | -0.021 | 0.094 | 8.253E-01 | 0.978 | cis | SARS-CoV-2 infection |
| 11606_22  | DNJB6                    | DnaI homolog subfamily 8 member 6                                        | Q75190 | DNAJB6    | chr7:157335381  | Wald ratio                | 1  | -0.021 | 0.094 | 8.256E-01 | 0.978 | cis | SARS-CoV-2 infection |
| 13116_25  | CD177                    | CD177 antigen                                                            | Q8NEQ3 | CD177     | chr19:43353686  | Inverse variance weighted | 8  | -0.002 | 0.010 | 8.257E-01 | 0.978 | cis | SARS-CoV-2 infection |
| 16916_19  | SLIK6                    | SLIT and NTRK-like protein 6                                             | QDH5Y7 | SLITRK6   | chr13:85806683  | Inverse variance weighted | 4  | 0.005  | 0.025 | 8.260E-01 | 0.978 | cis | SARS-CoV-2 infection |
| 12633_3   | PTN9                     | Tyrosine-protein phosphatase non-receptor type 9                         | P43378 | PTPN9     | chr15:75579315  | Wald ratio                | 1  | 0.019  | 0.086 | 8.276E-01 | 0.978 | cis | SARS-CoV-2 infection |
| 8252_2    | NOTUM                    | Palmitoleoyl-protein carboxylesterase NOTUM                              | Q6P988 | NOTUM     | chr17:81961840  | Inverse variance weighted | 3  | -0.011 | 0.051 | 8.277E-01 | 0.978 | cis | SARS-CoV-2 infection |
| 2789_26   | MMP-7                    | Matrilysin                                                               | P09237 | MMP7      | chr11:102530750 | Inverse variance weighted | 4  | -0.006 | 0.028 | 8.278E-01 | 0.978 | cis | SARS-CoV-2 infection |
| 8885_6    | CA2D3                    | Voltage-dependent calcium channel subunit alpha-2/delta-3                | Q8I258 | CACNA2D3  | chr3:54122547   | Inverse variance weighted | 5  | 0.005  | 0.023 | 8.281E-01 | 0.978 | cis | SARS-CoV-2 infection |
| 14623_26  | SUMO3                    | Small ubiquitin-related modifier 3                                       | P55854 | SUMO3     | chr21:44818779  | Wald ratio                | 1  | -0.019 | 0.086 | 8.283E-01 | 0.978 | cis | SARS-CoV-2 infection |
| 16763_11  | LECT2                    | Leukocyte cell-derived chemotaxin-2                                      | O14960 | LECT2     | chr5:135954983  | Inverse variance weighted | 9  | 0.003  | 0.012 | 8.285E-01 | 0.978 | cis | SARS-CoV-2 infection |
| 18930_28  | SLIT2                    | Slit homolog 2 protein                                                   | O94813 | SLIT2     | chr4:20251905   | Inverse variance weighted | 2  | -0.013 | 0.062 | 8.287E-01 | 0.978 | cis | SARS-CoV-2 infection |
| 6382_17   | MANBA                    | Beta-mannosidase                                                         | O00462 | MANBA     | chr4:102760994  | Inverse variance weighted | 5  | 0.005  | 0.022 | 8.303E-01 | 0.978 | cis | SARS-CoV-2 infection |
| 13122_19  | FLRT2                    | Leucine-rich repeat transmembrane protein FLRT2                          | O43155 | FLRT2     | chr14:85530144  | Inverse variance weighted | 5  | 0.003  | 0.016 | 8.304E-01 | 0.978 | cis | SARS-CoV-2 infection |
| 7871_16   | T132A                    | Transmembrane protein 132A                                               | Q241P5 | TMEM132A  | chr11:60924460  | Inverse variance weighted | 6  | 0.002  | 0.012 | 8.308E-01 | 0.978 | cis | SARS-CoV-2 infection |
| 4930_21   | Stanniocalcin-1          | Stanniocalcin-1                                                          | P52823 | STC1      | chr8:23854806   | Wald ratio                | 1  | -0.012 | 0.058 | 8.309E-01 | 0.978 | cis | SARS-CoV-2 infection |
| 8427_118  | RSP03                    | R-spondin-3                                                              | Q9BXV4 | RSP03     | chr6:127118671  | Inverse variance weighted | 4  | -0.013 | 0.061 | 8.309E-01 | 0.978 | cis | SARS-CoV-2 infection |
| 8299_66   | LIR44                    | Leukocyte immunoglobulin-like receptor subfamily A member 4              | P59901 | LIR44     | chr19:54339162  | Inverse variance weighted | 3  | -0.011 | 0.053 | 8.311E-01 | 0.978 | cis | SARS-CoV-2 infection |
| 2474_54   | SAP                      | Serum amyloid P-component                                                | P02743 | APCS      | chr1:159587826  | Inverse variance weighted | 3  | 0.005  | 0.023 | 8.311E-01 | 0.978 | cis | SARS-CoV-2 infection |
| 13109_82  | NEGR1                    | Neuronal growth regulator 1                                              | Q72381 | NEGR1     | chr1:72282539   | Wald ratio                | 1  | -0.016 | 0.077 | 8.317E-01 | 0.978 | cis | SARS-CoV-2 infection |
| 17345_12  | ZADH2                    | Prostaglandin reductase 3                                                | Q8NAQ0 | PTGR3     | chr18:75209139  | Wald ratio                | 1  | -0.010 | 0.049 | 8.319E-01 | 0.978 | cis | SARS-CoV-2 infection |
| 16324_38  | TLR1:CD                  | Toll-like receptor 1:Extracellular domain                                | Q15399 | TLR1      | chr4:38856817   | Wald ratio                | 1  | 0.009  | 0.042 | 8.327E-01 | 0.978 | cis | SARS-CoV-2 infection |
| 15514_26  | Pseudocholesterase       | Cholinesterase                                                           | P06276 | BCH       | chr3:165837462  | Inverse variance weighted | 6  | -0.003 | 0.014 | 8.330E-01 | 0.978 | cis | SARS-CoV-2 infection |
| 8376_25   | LSHB                     | Lutropin subunit beta                                                    | P01229 | LHB       | chr19:49017091  | Inverse variance weighted | 4  | -0.004 | 0.017 | 8.337E-01 | 0.978 | cis | SARS-CoV-2 infection |
| 8660_5    | OLF13                    | Olfactomedin-like protein 3                                              | Q9NRN5 | OLFM13    | chr1:113979391  | Inverse variance weighted | 2  | -0.010 | 0.047 | 8.345E-01 | 0.978 | cis | SARS-CoV-2 infection |
| 8351_17   | PRSS7                    | Serine protease 57                                                       | Q6UWY2 | PRSS57    | chr19:695498    | Inverse variance weighted | 6  | -0.004 | 0.020 | 8.345E-01 | 0.978 | cis | SARS-CoV-2 infection |
| 17410_5   | CETN3                    | Centrin-3                                                                | O15182 | CETN3     | chr5:90409766   | Wald ratio                | 1  | -0.014 | 0.066 | 8.349E-01 | 0.978 | cis | SARS-CoV-2 infection |
| 15384_15  | KLOTTH                   | Klotho                                                                   | Q9UEF7 | KL        | chr13:33016423  | Inverse variance weighted | 4  | -0.008 | 0.040 | 8.353E-01 | 0.978 | cis | SARS-CoV-2 infection |
| 10612_18  | PLOD3                    | Procollagen-lysine,2-oxoglutarate 5-dioxygenase 3                        | O60568 | PLOD3     | chr7:101218420  | Inverse variance weighted | 3  | 0.009  | 0.045 | 8.358E-01 | 0.978 | cis | SARS-CoV-2 infection |
| 5646_20   | RNA56                    | Ribonuclease K6                                                          | Q93091 | RNA56     | chr14:20781268  | Inverse variance weighted | 8  | 0.002  | 0.009 | 8.373E-01 | 0.978 | cis | SARS-CoV-2 infection |
| 17813_21  | BPHL                     | Valacyclovir hydrolase                                                   | Q86WA6 | BPHL      | chr6:3118374    | Inverse variance weighted | 2  | 0.013  | 0.062 | 8.384E-01 | 0.978 | cis | SARS-CoV-2 infection |
| 11145_72  | K154L                    | UPF0606 protein KIAA1549L                                                | Q6ZVL6 | KIAA1549L | chr11:33376108  | Inverse variance weighted | 7  | 0.004  | 0.018 | 8.386E-01 | 0.978 | cis | SARS-CoV-2 infection |
| 13113_7   | Osteopontin              | Osteopontin                                                              | P10451 | SP1       | chr4:87975667   | Inverse variance weighted | 2  | 0.006  | 0.029 | 8.389E-01 | 0.978 | cis | SARS-CoV-2 infection |
| 10800_15  | Collagen-binding protein | Serpin H1                                                                | P50454 | SERPINH1  | chr11:75562056  | Inverse variance weighted | 2  | 0.007  | 0.035 | 8.393E-01 | 0.978 | cis | SARS-CoV-2 infection |
| 2579_17   | MMP-9                    | Matrix metalloproteinase-9                                               | P14780 | MMP9      | chr20:46008908  | Wald ratio                | 1  | -0.013 | 0.064 | 8.394E-01 | 0.978 | cis | SARS-CoV-2 infection |
| 16823_75  | APOL3                    | Apolipoprotein L3                                                        | O95236 | APOL3     | chr22:36166177  | Inverse variance weighted | 7  | -0.002 | 0.011 | 8.396E-01 | 0.978 | cis | SARS-CoV-2 infection |
| 9021_1    | TIM-1                    | Hepatitis A virus cellular receptor 1                                    | Q96D42 | HAVCR1    | chr5:157069396  | Inverse variance weighted | 6  | 0.003  | 0.017 | 8.404E-01 | 0.978 | cis | SARS-CoV-2 infection |
| 6416_8    | GKN2                     | Gastrophilin-2                                                           | Q86KP6 | GKN2      | chr2:68952893   | Inverse variance weighted | 5  | 0.002  | 0.012 | 8.409E-01 | 0.978 | cis | SARS-CoV-2 infection |
| 16292_288 | GIP                      | Gastric inhibitory polypeptide                                           | P09681 | GIP       | chr17:48968596  | Wald ratio                | 1  | -0.020 | 0.102 | 8.409E-01 | 0.978 | cis | SARS-CoV-2 infection |
| 9747_48   | MARK3                    | MAP/microtubule affinity-regulating kinase 3                             | P27448 | MARK3     | chr12:103385377 | Wald ratio                | 1  | -0.023 | 0.116 | 8.412E-01 | 0.978 | cis | SARS-CoV-2 infection |
| 3581_53   | a2-HS-Glycoprotein       | Alpha-2-HS-glycoprotein                                                  | Q02765 | AHS       | chr3:186613060  | Inverse variance weighted | 4  | -0.007 | 0.036 | 8.417E-01 | 0.978 | cis | SARS-CoV-2 infection |
| 16753_46  | CO6A2                    | Collagen alpha-2(VI) chain                                               | P12110 | COL6A2    | chr21:46098112  | Inverse variance weighted | 4  | 0.005  | 0.027 | 8.417E-01 | 0.978 | cis | SARS-CoV-2 infection |
| 3043_49   | ON                       | SPARC                                                                    | P09486 | SPARC     | chr5:151686975  | Wald ratio                | 1  | 0.020  | 0.103 | 8.421E-01 | 0.978 | cis | SARS-CoV-2 infection |
| 9314_9    | PSG5                     | Pregnancy-specific beta-1-glycoprotein 5                                 | Q15238 | PSG5      | chr19:43186536  | Inverse variance weighted | 3  | 0.011  | 0.057 | 8.424E-01 | 0.978 | cis | SARS-CoV-2 infection |
| 7019_13   | Semaphorin-7A            | Semaphorin-7A                                                            | O75326 | SEMA7A    | chr15:74433958  | Wald ratio                | 1  | -0.012 | 0.060 | 8.427E-01 | 0.978 | cis | SARS-CoV-2 infection |
| 6247_9    | SIRB1                    | Signal-regulatory protein beta-1                                         | O00241 | SIRPB1    | chr20:1620061   | Inverse variance weighted | 9  | -0.001 | 0.005 | 8.442E-01 | 0.978 | cis | SARS-CoV-2 infection |
| 3166_92   | Siglec-3                 | Myeloid cell surface antigen CD33                                        | P20138 | CD33      | chr19:51225064  | Inverse variance weighted | 6  | -0.002 | 0.010 | 8.451E-01 | 0.978 | cis | SARS-CoV-2 infection |
| 9901_28   | EGLN1                    | Egl nine homolog 1                                                       | Q9G2T9 | EGLN1     | chr1:231422287  | Inverse variance weighted | 5  | 0.005  | 0.024 | 8.458E-01 | 0.978 | cis | SARS-CoV-2 infection |
| 3079_62   | TIG2                     | Retinoic acid receptor responder protein 2                               | Q99969 | RARRES2   | chr7:150341662  | Inverse variance weighted | 2  | -0.005 | 0.026 | 8.460E-01 | 0.978 | cis | SARS-CoV-2 infection |
| 7173_141  | T132C:CD                 | Transmembrane protein 132C:Extracellular domain                          | Q8N3T6 | TMEM132C  | chr12:128267170 | Inverse variance weighted | 5  | 0.003  | 0.015 | 8.485E-01 | 0.978 | cis | SARS-CoV-2 infection |
| 15299_102 | MESD2                    | LDLR chaperone MESD                                                      | Q14696 | MESD      | chr15:80989828  | Wald ratio                | 1  | 0.020  | 0.103 | 8.491E-01 | 0.978 | cis | SARS-CoV-2 infection |
| 16825_20  | ATX3                     | Ataxin-3                                                                 | P54252 | ATXN3     | chr14:92106621  | Inverse variance weighted | 4  | 0.004  | 0.019 | 8.496E-01 | 0.978 | cis | SARS-CoV-2 infection |
| 4721_54   | TF3                      | Trefoil factor 3                                                         | Q07654 | TF3       | chr21:42315409  | Inverse variance weighted | 3  | -0.012 | 0.061 | 8.496E-01 | 0.978 | cis | SARS-CoV-2 infection |
| 3186_2    | C2                       | Complement C2                                                            | P06681 | C2        | chr6:31897785   | Inverse variance weighted | 2  | -0.024 | 0.124 | 8.496E-01 | 0.978 | cis | SARS-CoV-2 infection |
| 7761_125  | CHK8                     | Choline/ethanolamine kinase                                              | Q9Y259 | CHK8      | chr22:50601455  | Inverse variance weighted | 3  | 0.011  | 0.056 | 8.500E-01 | 0.978 | cis | SARS-CoV-2 infection |
| 13676_46  | Inhibin bB chain         | Inhibin beta B chain                                                     | P09529 | INHBB     | chr2:120346136  | Inverse variance weighted | 4  | -0.003 | 0.014 | 8.502E-01 | 0.978 | cis | SARS-CoV-2 infection |
| 5803_24   | C3d                      | Complement C3d fragment                                                  | P01024 | C3        | chr19:6730562   | Wald ratio                | 1  | -0.017 | 0.090 | 8.503E-01 | 0.978 | cis | SARS-CoV-2 infection |
| 7648_9    | MYP1C1                   | Myosin-binding protein C, slow-type                                      | Q00872 | MYBPC1    | chr12:101568353 | Wald ratio                | 1  | -0.011 | 0.059 | 8.513E-01 | 0.978 | cis | SARS-CoV-2 infection |
| 7208_60   | MGT4C                    | Alpha-1,3-mannosyl-glycoprotein 4-beta-N-acetylglucosaminyltransferase C | Q9UBM8 | MGT4C     | chr12:86838904  | Wald ratio                | 1  | 0.015  | 0.082 | 8.516E-01 | 0.978 | cis | SARS-CoV-2 infection |
| 2843_13   | SPINT2                   | Kunitz-type protease inhibitor 2                                         | O43291 | SPINT2    | chr19:38244035  | Inverse variance weighted | 7  | 0.003  | 0.015 | 8.516E-01 | 0.978 | cis | SARS-CoV-2 infection |
| 2480_58   | TIMP-3                   | Metalloproteinase inhibitor 3                                            | P35625 | TIMP3     | chr22:32801705  | Inverse variance weighted | 10 | -0.002 | 0.012 | 8.521E-01 | 0.978 | cis | SARS-CoV-2 infection |
| 12382_2   | DDX58                    | Probable ATP-dependent RNA helicase DDX58                                | O95786 | DDX58     | chr9:32526208   | Inverse variance weighted | 2  | -0.008 | 0.045 | 8.526E-01 | 0.978 | cis | SARS-CoV-2 infection |
| 6580_29   | Pregnancy zone protein   | Pregnancy zone protein                                                   | P20742 | PZP       | chr12:9208395   | Inverse variance weighted | 2  | 0.009  | 0.049 | 8.526E-01 | 0.978 | cis | SARS-CoV-2 infection |
| 7009_8    | CD72                     | B-cell differentiation antigen CD72                                      | P21854 | CD72      | chr9:35646810   | Inverse variance weighted | 2  | 0.008  | 0.042 | 8.529E-01 | 0.978 | cis | SARS-CoV-2 infection |
| 14636_25  | Ribonuclease UK114       | Ribonuclease UK114                                                       | P52758 | RIDA      | chr8:98117171   | Inverse variance weighted | 3  | -0.003 | 0.018 | 8.542E-01 | 0.978 | cis | SARS-CoV-2 infection |
| 6373_54   | DLK1                     | Protein delta homolog 1                                                  | P80370 | DLK1      | chr14:100725705 | Inverse variance weighted | 2  | -0.012 | 0.065 | 8.559E-01 | 0.978 | cis | SARS-CoV-2 infection |
| 12396_19  | HIBCH                    | 3-hydroxyisobutyryl-CoA hydrolase, mitochondrial                         | Q6NVY1 | HIBCH     | chr2:190344193  | Inverse variance weighted | 5  | -0.002 | 0.014 | 8.560E-01 | 0.978 | cis | SARS-CoV-2 infection |
| 19187_21  | STABP                    | STAM-binding protein                                                     | O95630 | STAMPB    | chr2:73828916   | Inverse variance weighted | 2  | 0.013  | 0.074 | 8.564E-01 | 0.978 | cis | SARS-CoV-2 infection |
| 8013_9    | LMA2L                    | VIP36-like protein                                                       | Q9H0V9 | LMAN2L    | chr2:96740064   | Inverse variance weighted | 2  | -0.013 | 0.073 | 8.572E-01 | 0.978 | cis | SARS-CoV-2 infection |
| 5452_71   | ASGR1                    | Asialoglycoprotein receptor 1                                            | P07306 | ASGR1     | chr17:719564    | Inverse variance weighted | 2  | -0.009 | 0.047 | 8.572E-01 | 0.978 | cis | SARS-CoV-2 infection |
| 9343_16   | IL-2 sRb                 | Interleukin-2 receptor subunit beta                                      | P14784 | IL2RB     | chr22:37175118  | Wald ratio                | 1  | 0.009  | 0.049 | 8.576E-01 | 0.978 | cis | SARS-CoV-2 infection |
| 13982_33  | RGS18                    | Regulator of G-protein signaling 18                                      | Q9NS28 | RGS18     | chr1:192158462  | Wald ratio                | 1  | -0.015 | 0.083 | 8.578E-01 | 0.978 | cis | SARS-CoV-2 infection |
| 16599_38  | GPNI1                    | GPN-loop GTPase 1                                                        | Q9HCN4 | GPNI1     | chr2:27628247   | Wald ratio                | 1  | 0.011  | 0.064 | 8.590E-01 | 0.978 | cis | SARS-CoV-2 infection |
| 7227_75   | COCH                     | Cochlin                                                                  | O43405 | COCH      | chr14:30874514  | Inverse variance weighted | 4  | 0.003  | 0.018 | 8.595E-01 | 0.978 | cis | SARS-CoV-2 infection |
| 13088_397 | BTC                      | Betacellulin                                                             | P35070 | BTC       | chr4:74794523   | Inverse variance weighted | 2  | -0.007 | 0.037 | 8.596E-01 | 0.978 | cis | SARS-CoV-2 infection |

|           |                                 |                                                                                    |        |          |                 |                           |   |        |       |           |       |     |                      |
|-----------|---------------------------------|------------------------------------------------------------------------------------|--------|----------|-----------------|---------------------------|---|--------|-------|-----------|-------|-----|----------------------|
| 3024_18   | a2-Antiplasmin                  | Alpha-2-antiplasmin                                                                | P08697 | SERPINF2 | chr17:1742836   | Inverse variance weighted | 3 | 0.005  | 0.030 | 8.597E-01 | 0.978 | cis | SARS-CoV-2 infection |
| 17773_26  | SNAG                            | Gamma-soluble NSF attachment protein                                               | Q97947 | NAPG     | chr18:10525905  | Wald ratio                | 1 | -0.012 | 0.066 | 8.601E-01 | 0.978 | cis | SARS-CoV-2 infection |
| 15615_8   | URB3                            | Leukocyte immunoglobulin-like receptor subfamily B member 3                        | O75022 | LILRB3   | chr19:54223506  | Inverse variance weighted | 5 | -0.006 | 0.037 | 8.604E-01 | 0.978 | cis | SARS-CoV-2 infection |
| 12524_18  | SAT2                            | Diamine acetyltransferase 2                                                        | Q96F10 | SAT2     | chr17:7627876   | Inverse variance weighted | 3 | 0.006  | 0.033 | 8.610E-01 | 0.978 | cis | SARS-CoV-2 infection |
| 3535_84   | DKK1                            | Dickkopf-related protein 1                                                         | Q94907 | DKK1     | chr10:52314281  | Inverse variance weighted | 5 | 0.006  | 0.036 | 8.624E-01 | 0.978 | cis | SARS-CoV-2 infection |
| 8245_27   | siCAM-5                         | Intercellular adhesion molecule 5                                                  | Q9UMF0 | ICAM5    | chr19:10289952  | Inverse variance weighted | 3 | -0.009 | 0.052 | 8.625E-01 | 0.978 | cis | SARS-CoV-2 infection |
| 5631_83   | MOT1                            | Promotilin                                                                         | T12M72 | MLN      | chr6:33804003   | Inverse variance weighted | 6 | 0.002  | 0.011 | 8.630E-01 | 0.978 | cis | SARS-CoV-2 infection |
| 13118_5   | SMOC1                           | SPARC-related modular calcium-binding protein 1                                    | Q9H4F8 | SMOC1    | chr14:69854131  | Inverse variance weighted | 3 | 0.005  | 0.030 | 8.631E-01 | 0.978 | cis | SARS-CoV-2 infection |
| 12714_38  | AP1G2                           | AP-1 complex subunit gamma-like 2                                                  | O75843 | AP1G2    | chr14:23568070  | Inverse variance weighted | 3 | 0.005  | 0.028 | 8.634E-01 | 0.978 | cis | SARS-CoV-2 infection |
| 9565_6    | PAWR                            | PRKC apoptosis WT1 regulator protein                                               | Q96I20 | PAWR     | chr12:79690964  | Wald ratio                | 1 | -0.018 | 0.104 | 8.649E-01 | 0.978 | cis | SARS-CoV-2 infection |
| 11102_22  | REG4                            | Regenerating islet-derived protein 4                                               | Q9BYZ8 | REG4     | chr1:119811580  | Inverse variance weighted | 5 | 0.005  | 0.029 | 8.650E-01 | 0.978 | cis | SARS-CoV-2 infection |
| 8035_6    | CA198                           | Uncharacterized protein C1orf198                                                   | Q9H4Z5 | C1orf198 | chr1:230869589  | Wald ratio                | 1 | 0.007  | 0.043 | 8.658E-01 | 0.978 | cis | SARS-CoV-2 infection |
| 12357_41  | SNP29                           | Synaptosomal-associated protein 29                                                 | O95721 | SNAP29   | chr22:20859007  | Wald ratio                | 1 | 0.012  | 0.073 | 8.658E-01 | 0.978 | cis | SARS-CoV-2 infection |
| 17746_77  | FIS1                            | Mitochondrial fission 1 protein                                                    | Q9Y3D6 | FIS1     | chr7:101252316  | Inverse variance weighted | 2 | -0.011 | 0.068 | 8.659E-01 | 0.978 | cis | SARS-CoV-2 infection |
| 8368_102  | TNF sR-II                       | Tumor necrosis factor receptor superfamily member 18                               | T20333 | TNFRSF18 | chr1:12166991   | Wald ratio                | 1 | 0.005  | 0.031 | 8.659E-01 | 0.978 | cis | SARS-CoV-2 infection |
| 5731_1    | ISK6                            | Serine protease inhibitor Kazal-type 6                                             | Q6UWN8 | SPINK6   | chr5:148202794  | Inverse variance weighted | 9 | 0.002  | 0.011 | 8.662E-01 | 0.978 | cis | SARS-CoV-2 infection |
| 5649_83   | PSG4                            | Pregnancy-specific beta-1-glycoprotein 4                                           | QO0888 | PSG4     | chr19:43207299  | Inverse variance weighted | 3 | -0.009 | 0.056 | 8.664E-01 | 0.978 | cis | SARS-CoV-2 infection |
| 4471_50   | TGM3                            | Protein-glutamine gamma-glutamyltransferase E                                      | Q08188 | TGM3     | chr22:2296001   | Inverse variance weighted | 4 | 0.002  | 0.013 | 8.672E-01 | 0.978 | cis | SARS-CoV-2 infection |
| 5029_3    | SEPR                            | Prolyl endopeptidase FAP                                                           | Q12884 | FAP      | chr2:162245151  | Inverse variance weighted | 5 | 0.004  | 0.024 | 8.674E-01 | 0.978 | cis | SARS-CoV-2 infection |
| 7128_9    | VWA2                            | von Willebrand factor A domain-containing protein 2                                | Q5GFL6 | VWA2     | chr10:114239254 | Inverse variance weighted | 6 | -0.003 | 0.019 | 8.685E-01 | 0.978 | cis | SARS-CoV-2 infection |
| 19496_1   | NPL                             | N-acetylneuraminatase lyase                                                        | Q9BXD5 | NPL      | chr1:182789293  | Inverse variance weighted | 3 | -0.009 | 0.054 | 8.685E-01 | 0.978 | cis | SARS-CoV-2 infection |
| 2381_52   | CS                              | Complement C5                                                                      | P01031 | C5       | chr9:121075195  | Inverse variance weighted | 2 | -0.008 | 0.052 | 8.697E-01 | 0.978 | cis | SARS-CoV-2 infection |
| 9796_4    | CEL                             | Bile salt-activated lipase                                                         | P19835 | CEL      | chr9:133061981  | Inverse variance weighted | 5 | -0.004 | 0.022 | 8.702E-01 | 0.978 | cis | SARS-CoV-2 infection |
| 3235_50   | WFKN2                           | WAP, Kazal, immunoglobulin, Kunitz and NTR domain-containing protein 2             | Q8TEU8 | WFIKN2   | chr17:50834650  | Inverse variance weighted | 7 | 0.002  | 0.012 | 8.707E-01 | 0.978 | cis | SARS-CoV-2 infection |
| 13384_110 | FUMH                            | Fumarate hydratase, mitochondrial                                                  | P07954 | FH       | chr1:241519799  | Wald ratio                | 1 | 0.006  | 0.035 | 8.711E-01 | 0.978 | cis | SARS-CoV-2 infection |
| 9719_145  | MMP-16                          | Matrix metalloproteinase-16                                                        | P51512 | MMP16    | chr8:88328025   | Wald ratio                | 1 | 0.013  | 0.078 | 8.712E-01 | 0.978 | cis | SARS-CoV-2 infection |
| 3640_14   | RAP                             | alpha-2-macroglobulin receptor-associated protein                                  | P30533 | LRPAP1   | chr4:3532446    | Inverse variance weighted | 4 | -0.004 | 0.022 | 8.712E-01 | 0.978 | cis | SARS-CoV-2 infection |
| 7935_26   | LARGE                           | Glycosyltransferase-like protein LARGE1                                            | O95461 | LARGE1   | chr22:33922841  | Inverse variance weighted | 2 | 0.007  | 0.040 | 8.714E-01 | 0.978 | cis | SARS-CoV-2 infection |
| 5139_32   | UNC5H3                          | Netrin receptor UNC5C                                                              | O95185 | UNC5C    | chr4:95549206   | Inverse variance weighted | 3 | 0.004  | 0.026 | 8.735E-01 | 0.978 | cis | SARS-CoV-2 infection |
| 5353_89   | IL-1Ra                          | Interleukin-1 receptor antagonist protein                                          | P18510 | IL1RN    | chr2:113099315  | Inverse variance weighted | 3 | 0.006  | 0.035 | 8.737E-01 | 0.978 | cis | SARS-CoV-2 infection |
| 14655_1   | DJIC7                           | Dnal homolog subfamily C member 17                                                 | Q9NVM6 | DNAJC17  | chr15:40807478  | Inverse variance weighted | 2 | -0.012 | 0.079 | 8.739E-01 | 0.978 | cis | SARS-CoV-2 infection |
| 14271_23  | RAB6B                           | Ras-related protein Rab-6B                                                         | Q9NRW1 | RAB6B    | chr3:133895882  | Wald ratio                | 1 | 0.004  | 0.024 | 8.745E-01 | 0.978 | cis | SARS-CoV-2 infection |
| 5475_10   | PKC-B-II                        | Protein kinase C beta type (splice variant beta-II)                                | P05771 | PRKCB    | chr16:23835983  | Wald ratio                | 1 | 0.010  | 0.065 | 8.763E-01 | 0.978 | cis | SARS-CoV-2 infection |
| 9470_15   | METZ4                           | Methyltransferase-like protein 24                                                  | Q5IXM2 | METT124  | chr6:110358349  | Inverse variance weighted | 4 | -0.005 | 0.034 | 8.764E-01 | 0.978 | cis | SARS-CoV-2 infection |
| 8325_37   | ADH4                            | Alcohol dehydrogenase 4                                                            | O98319 | ADH4     | chr4:99157792   | Wald ratio                | 1 | -0.009 | 0.060 | 8.767E-01 | 0.978 | cis | SARS-CoV-2 infection |
| 9388_18   | MCEE                            | Methylmalonyl-CoA epimerase, mitochondrial                                         | Q96PE7 | MCEE     | chr2:71130239   | Wald ratio                | 1 | -0.013 | 0.085 | 8.768E-01 | 0.978 | cis | SARS-CoV-2 infection |
| 15476_6   | REG3G                           | Regenerating islet-derived protein 3-gamma                                         | Q6UW15 | REG3G    | chr2:79025686   | Inverse variance weighted | 7 | 0.002  | 0.013 | 8.785E-01 | 0.978 | cis | SARS-CoV-2 infection |
| 9216_100  | PLXB2                           | Plexin-B2                                                                          | O15031 | PLXNB2   | chr22:50307646  | Inverse variance weighted | 5 | -0.002 | 0.015 | 8.786E-01 | 0.978 | cis | SARS-CoV-2 infection |
| 4771_10   | ASM3A                           | Acid sphingomyelinase-like phosphodiesterase 3a                                    | Q92484 | SMPDL3A  | chr6:122789049  | Inverse variance weighted | 3 | -0.003 | 0.022 | 8.786E-01 | 0.978 | cis | SARS-CoV-2 infection |
| 16079_2   | TEC                             | Tyrosine-protein kinase Tec                                                        | P42680 | TEC      | chr4:48269838   | Inverse variance weighted | 2 | -0.009 | 0.060 | 8.800E-01 | 0.978 | cis | SARS-CoV-2 infection |
| 15540_6   | Vimentin                        | Vimentin                                                                           | P08670 | VIM      | chr10:17228241  | Inverse variance weighted | 2 | 0.009  | 0.061 | 8.804E-01 | 0.978 | cis | SARS-CoV-2 infection |
| 9769_48   | DNER:ECD                        | Delta and Notch-like epidermal growth factor-related receptor:Extracellular domain | Q8NF78 | DNER     | chr2:229714555  | Inverse variance weighted | 5 | -0.003 | 0.019 | 8.813E-01 | 0.978 | cis | SARS-CoV-2 infection |
| 6086_15   | CRDL2                           | Chordin-like protein 2                                                             | Q6WN34 | CHRD12   | chr11:74731426  | Inverse variance weighted | 5 | 0.002  | 0.015 | 8.820E-01 | 0.978 | cis | SARS-CoV-2 infection |
| 4924_32   | MMP-1                           | Interstitial collagenase                                                           | P03956 | MMP1     | chr11:102798160 | Inverse variance weighted | 9 | 0.002  | 0.013 | 8.827E-01 | 0.978 | cis | SARS-CoV-2 infection |
| 4811_33   | ITI heavy chain H4              | Inter-alpha-trypsin inhibitor heavy chain H4                                       | Q14624 | ITIHA    | chr3:52830688   | Inverse variance weighted | 2 | -0.022 | 0.147 | 8.838E-01 | 0.978 | cis | SARS-CoV-2 infection |
| 3799_11   | Carbonic anhydrase III          | Carbonic anhydrase 3                                                               | P07451 | CA3      | chr8:85373436   | Inverse variance weighted | 4 | -0.004 | 0.029 | 8.840E-01 | 0.978 | cis | SARS-CoV-2 infection |
| 6909_40   | MGA72                           | Alpha-1,6-mannosyl-glycoprotein 2-beta-N-acetylglucosaminyltransferase             | Q10469 | MGA72    | chr14:49620799  | Wald ratio                | 1 | -0.005 | 0.035 | 8.893E-01 | 0.978 | cis | SARS-CoV-2 infection |
| 8842_16   | GRM1C                           | GRAM domain-containing protein 1C                                                  | Q8IY50 | GRAMD1C  | chr3:113828182  | Inverse variance weighted | 5 | 0.006  | 0.044 | 8.895E-01 | 0.978 | cis | SARS-CoV-2 infection |
| 5634_39   | OFUT1                           | GDP-fucose protein O-fucosyltransferase 1                                          | Q9H488 | POFUT1   | chr20:32207855  | Inverse variance weighted | 3 | 0.002  | 0.017 | 8.899E-01 | 0.978 | cis | SARS-CoV-2 infection |
| 3435_53   | FN1.4                           | Fibronectin Fragment 4                                                             | P02751 | FN1      | chr2:215436073  | Wald ratio                | 1 | -0.017 | 0.121 | 8.900E-01 | 0.978 | cis | SARS-CoV-2 infection |
| 2961_1    | Protein C                       | Vitamin K-dependent protein C                                                      | P04070 | PROC     | chr2:127418427  | Inverse variance weighted | 3 | 0.007  | 0.051 | 8.907E-01 | 0.978 | cis | SARS-CoV-2 infection |
| 13427_66  | MA1C1                           | Mannosyl-oligosaccharide 1,2-alpha-mannosidase IC                                  | Q9NR34 | MAN1C1   | chr1:25616791   | Inverse variance weighted | 3 | 0.003  | 0.023 | 8.916E-01 | 0.978 | cis | SARS-CoV-2 infection |
| 9278_9    | SDF-1                           | Stromal cell-derived factor 1                                                      | P48061 | CXCL12   | chr10:44386493  | Inverse variance weighted | 2 | 0.007  | 0.054 | 8.917E-01 | 0.978 | cis | SARS-CoV-2 infection |
| 9884_8    | PP1L1                           | Peptidyl-prolyl cis-trans isomerase-like 1                                         | Q9Y3C6 | PP1L1    | chr6:36874803   | Inverse variance weighted | 5 | 0.001  | 0.010 | 8.922E-01 | 0.978 | cis | SARS-CoV-2 infection |
| 6461_54   | Apo C-III                       | Apolipoprotein C-III                                                               | P02656 | APOC3    | chr11:116829706 | Inverse variance weighted | 2 | -0.008 | 0.056 | 8.924E-01 | 0.978 | cis | SARS-CoV-2 infection |
| 15499_11  | Attractin                       | Attractin                                                                          | O75882 | ATRN     | chr20:3471018   | Inverse variance weighted | 5 | -0.002 | 0.018 | 8.926E-01 | 0.978 | cis | SARS-CoV-2 infection |
| 7163_26   | lacratin                        | Extracellular glycoprotein lacratin                                                | Q9GZ28 | LACRT    | chr12:54634895  | Wald ratio                | 1 | 0.014  | 0.107 | 8.927E-01 | 0.978 | cis | SARS-CoV-2 infection |
| 9197_4    | LEG9                            | Galectin-9                                                                         | O00182 | LGALS9   | chr17:27629798  | Wald ratio                | 1 | -0.006 | 0.044 | 8.930E-01 | 0.978 | cis | SARS-CoV-2 infection |
| 4160_49   | MMP-2                           | 72 kDa type IV collagenase                                                         | P08253 | MMP2     | chr16:55389700  | Inverse variance weighted | 2 | -0.006 | 0.044 | 8.934E-01 | 0.978 | cis | SARS-CoV-2 infection |
| 8345_27   | GPX7                            | Glutathione peroxidase 7                                                           | Q965L4 | GPX7     | chr1:52602371   | Inverse variance weighted | 7 | -0.001 | 0.011 | 8.936E-01 | 0.978 | cis | SARS-CoV-2 infection |
| 7875_86   | PLEK                            | Pleckstrin                                                                         | P08567 | PLEK     | chr2:68365282   | Inverse variance weighted | 2 | -0.008 | 0.057 | 8.937E-01 | 0.978 | cis | SARS-CoV-2 infection |
| 3054_3    | Haptoglobin, Mixed Type         | Haptoglobin                                                                        | P00738 | HP       | chr6:72054505   | Inverse variance weighted | 4 | -0.002 | 0.016 | 8.949E-01 | 0.978 | cis | SARS-CoV-2 infection |
| 3481_87   | XPNPEP1                         | Xaa-Pro aminopeptidase 1                                                           | Q9NQW7 | XPNPEP1  | chr10:109923553 | Wald ratio                | 1 | -0.010 | 0.074 | 8.957E-01 | 0.978 | cis | SARS-CoV-2 infection |
| 14133_93  | IL-1 sRII                       | Interleukin-1 receptor type 2                                                      | P27930 | IL1R2    | chr2:101991960  | Inverse variance weighted | 7 | 0.003  | 0.020 | 8.965E-01 | 0.978 | cis | SARS-CoV-2 infection |
| 15506_34  | LRP12                           | Low-density lipoprotein receptor-related protein 12                                | Q9Y561 | LRP12    | chr8:104589258  | Inverse variance weighted | 2 | 0.017  | 0.129 | 8.979E-01 | 0.978 | cis | SARS-CoV-2 infection |
| 9449_150  | C4b-binding protein alpha chain | C4b-binding protein alpha chain                                                    | P04003 | C4BPA    | chr1:207104233  | Inverse variance weighted | 6 | 0.003  | 0.024 | 8.996E-01 | 0.978 | cis | SARS-CoV-2 infection |
| 9995_6    | DUT                             | Deoxyuridine 5'-triphosphate nucleotidohydrolase, mitochondrial                    | P33316 | DUT      | chr15:48331011  | Wald ratio                | 1 | 0.010  | 0.080 | 8.997E-01 | 0.978 | cis | SARS-CoV-2 infection |
| 17161_1   | OST48                           | Dolichyl-diphosphooligosaccharide--protein glycosyltransferase 48 kDa subunit      | P39656 | DDOST    | chr1:20661544   | Inverse variance weighted | 2 | -0.002 | 0.015 | 9.001E-01 | 0.978 | cis | SARS-CoV-2 infection |
| 7779_86   | CHST8                           | Carbohydrate sulfotransferase 11                                                   | Q9NPF2 | CHST11   | chr12:104455295 | Inverse variance weighted | 5 | 0.002  | 0.015 | 9.004E-01 | 0.978 | cis | SARS-CoV-2 infection |
| 17787_1   | Enoyl-CoA hydratase             | Enoyl-CoA hydratase, mitochondrial                                                 | P30084 | ECHS1    | chr10:133373354 | Wald ratio                | 1 | -0.012 | 0.094 | 9.017E-01 | 0.978 | cis | SARS-CoV-2 infection |
| 9185_15   | TFF1                            | Trefoil factor 1                                                                   | P04155 | TFF1     | chr21:42366535  | Inverse variance weighted | 3 | -0.002 | 0.017 | 9.020E-01 | 0.978 | cis | SARS-CoV-2 infection |
| 9870_17   | SYWC                            | Tryptophan--RNA ligase, cytoplasmic                                                | P23381 | WARS1    | chr14:100376805 | Inverse variance weighted | 2 | -0.005 | 0.037 | 9.020E-01 | 0.978 | cis | SARS-CoV-2 infection |
| 4159_130  | Factor H                        | Complement factor H                                                                | P08603 | CFH      | chr1:196651754  | Wald ratio                | 1 | 0.009  | 0.070 | 9.026E-01 | 0.978 | cis | SARS-CoV-2 infection |
| 15644_1   | Biotinidase                     | Biotinidase                                                                        | P43251 | BITD     | chr3:1560131    | Inverse variance weighted | 9 | 0.001  | 0.012 | 9.029E-01 | 0.978 | cis | SARS-CoV-2 infection |
| 19482_11  | HDHD3                           | Haloacetal dehalogenase-like hydrolase domain-containing protein 3                 | Q985H5 | HDHD3    | chr9:113376986  | Wald ratio                | 1 | -0.003 | 0.027 | 9.038E-01 | 0.978 | cis | SARS-CoV-2 infection |
| 15566_10  | Calponin-1                      | Calponin-1                                                                         | P51911 | CNN1     | chr19:11538767  | Wald ratio                | 1 | 0.005  | 0.038 | 9.045E-01 | 0.978 | cis | SARS-CoV-2 infection |
| 2771_35   | IGFBP-1                         | Insulin-like growth factor-binding protein 1                                       | P08833 | IGFBP1   | chr7:45888360   | Wald ratio                | 1 | -0.007 | 0.062 | 9.050E-01 | 0.978 | cis | SARS-CoV-2 infection |
| 16296_43  | LGR5                            | Leucine-rich repeat-containing G-protein coupled receptor 5                        | O75473 | LGR5     | chr12:71439798  | Wald ratio                | 1 | 0.010  | 0.088 | 9.069E-01 | 0.978 | cis | SARS-CoV-2 infection |

|           |                         |        |          |                |                           |    |        |       |           |       |     |                      |
|-----------|-------------------------|--------|----------|----------------|---------------------------|----|--------|-------|-----------|-------|-----|----------------------|
| 3292_75   | CD48                    | P09326 | CD48     | chr1:160711831 | Inverse variance weighted | 5  | -0.003 | 0.025 | 9.071E-01 | 0.978 | cis | SARS-CoV-2 infection |
| 10419_1   | SCAR5                   | Q6ZMJ2 | SCAR5    | chr8:27992673  | Inverse variance weighted | 5  | -0.004 | 0.031 | 9.075E-01 | 0.978 | cis | SARS-CoV-2 infection |
| 3457_57   | Periostin               | Q15063 | POSTN    | chr13:37598844 | Inverse variance weighted | 4  | -0.003 | 0.028 | 9.077E-01 | 0.978 | cis | SARS-CoV-2 infection |
| 16890_37  | ATL1                    | Q8N6G6 | ADAMTSL1 | chr9:17906563  | Inverse variance weighted | 6  | 0.002  | 0.014 | 9.079E-01 | 0.978 | cis | SARS-CoV-2 infection |
| 5337_64   | B7-2                    | CD86   | CD86     | chr3:122055362 | Wald ratio                | 1  | 0.010  | 0.084 | 9.087E-01 | 0.978 | cis | SARS-CoV-2 infection |
| 13959_7   | LAP                     | P28838 | LAP3     | chr4:17577198  | Wald ratio                | 1  | -0.012 | 0.104 | 9.092E-01 | 0.978 | cis | SARS-CoV-2 infection |
| 8053_16   | DI814:CD                | Q8TBM8 | DNAB184  | chr4:99946618  | Wald ratio                | 1  | 0.009  | 0.079 | 9.093E-01 | 0.978 | cis | SARS-CoV-2 infection |
| 3470_1    | sE-Selectin             | P16581 | SELE     | chr1:169764705 | Wald ratio                | 1  | 0.007  | 0.059 | 9.110E-01 | 0.978 | cis | SARS-CoV-2 infection |
| 6527_1    | TRIL:ECD                | Q7L0X0 | TRIL     | chr7:28958330  | Wald ratio                | 1  | 0.007  | 0.062 | 9.110E-01 | 0.978 | cis | SARS-CoV-2 infection |
| 11540_37  | FOXO3A                  | O43524 | FOXO3    | chr6:108559835 | Wald ratio                | 1  | -0.010 | 0.093 | 9.119E-01 | 0.978 | cis | SARS-CoV-2 infection |
| 13095_51  | PSP                     | P05451 | REG1A    | chr2:79120362  | Inverse variance weighted | 4  | -0.005 | 0.050 | 9.120E-01 | 0.978 | cis | SARS-CoV-2 infection |
| 5015_15   | PAFAH                   | Q13093 | PLA2G7   | chr6:46735693  | Inverse variance weighted | 2  | 0.005  | 0.049 | 9.125E-01 | 0.978 | cis | SARS-CoV-2 infection |
| 19188_21  | NAP2L                   | Q99733 | NAP1L4   | chr11:2992377  | Wald ratio                | 1  | -0.003 | 0.031 | 9.126E-01 | 0.978 | cis | SARS-CoV-2 infection |
| 15626_223 | Perlecan                | P98160 | HSPG2    | chr1:21937310  | Inverse variance weighted | 4  | -0.002 | 0.017 | 9.130E-01 | 0.978 | cis | SARS-CoV-2 infection |
| 17164_15  | annexin IV              | P09525 | ANXA4    | chr2:69644425  | Inverse variance weighted | 2  | -0.003 | 0.031 | 9.135E-01 | 0.978 | cis | SARS-CoV-2 infection |
| 17453_34  | Ceruloplasmin           | P04A50 | CP       | chr3:149221829 | Inverse variance weighted | 3  | 0.004  | 0.035 | 9.145E-01 | 0.978 | cis | SARS-CoV-2 infection |
| 11333_82  | RHG25                   | P42331 | ARHGAP25 | chr2:68679601  | Wald ratio                | 1  | 0.003  | 0.032 | 9.146E-01 | 0.978 | cis | SARS-CoV-2 infection |
| 7192_37   | CRF2-12                 | Q8IU57 | IFNLR1   | chr1:24187959  | Inverse variance weighted | 3  | 0.004  | 0.037 | 9.159E-01 | 0.978 | cis | SARS-CoV-2 infection |
| 9370_69   | GGH                     | Q92820 | GGH      | chr8:63039407  | Inverse variance weighted | 5  | 0.001  | 0.014 | 9.160E-01 | 0.978 | cis | SARS-CoV-2 infection |
| 5021_13   | PPase                   | Q15181 | PPA1     | chr10:70233911 | Inverse variance weighted | 4  | 0.003  | 0.029 | 9.160E-01 | 0.978 | cis | SARS-CoV-2 infection |
| 14076_74  | Cystatin-S              | P01036 | CST4     | chr20:23689038 | Inverse variance weighted | 3  | -0.003 | 0.031 | 9.162E-01 | 0.978 | cis | SARS-CoV-2 infection |
| 9213_24   | FTCD                    | O95954 | FTCD     | chr21:46155579 | Inverse variance weighted | 3  | -0.005 | 0.046 | 9.173E-01 | 0.978 | cis | SARS-CoV-2 infection |
| 16607_78  | Gelsolin                | P06396 | GSN      | chr9:121207794 | Inverse variance weighted | 2  | -0.008 | 0.074 | 9.176E-01 | 0.978 | cis | SARS-CoV-2 infection |
| 4141_79   | IP-10                   | P02778 | CXCL10   | chr4:76023497  | Wald ratio                | 1  | 0.010  | 0.102 | 9.191E-01 | 0.978 | cis | SARS-CoV-2 infection |
| 13686_2   | IL-5 Ra                 | Q10344 | IL5RA    | chr3:3126613   | Inverse variance weighted | 6  | 0.001  | 0.013 | 9.210E-01 | 0.978 | cis | SARS-CoV-2 infection |
| 7957_2    | SCG3                    | Q8WDX2 | SCG3     | chr15:51681492 | Inverse variance weighted | 7  | 0.001  | 0.013 | 9.213E-01 | 0.978 | cis | SARS-CoV-2 infection |
| 10630_5   | HTAI2                   | Q9BU33 | HTATIP2  | chr11:20363685 | Inverse variance weighted | 9  | 0.001  | 0.014 | 9.234E-01 | 0.978 | cis | SARS-CoV-2 infection |
| 19602_36  | jun-D                   | P17535 | JUND     | chr19:18281622 | Wald ratio                | 1  | 0.009  | 0.093 | 9.235E-01 | 0.978 | cis | SARS-CoV-2 infection |
| 7921_65   | FIX1                    | Q86VR8 | FIX1     | chr11:35618460 | Inverse variance weighted | 4  | -0.002 | 0.019 | 9.235E-01 | 0.978 | cis | SARS-CoV-2 infection |
| 8469_41   | IGFBP-2                 | P18065 | IGFBP2   | chr2:216632828 | Inverse variance weighted | 2  | -0.008 | 0.088 | 9.237E-01 | 0.978 | cis | SARS-CoV-2 infection |
| 14090_23  | DEFI6                   | Q9H4E7 | DEF6     | chr6:35297818  | Inverse variance weighted | 2  | -0.003 | 0.028 | 9.238E-01 | 0.978 | cis | SARS-CoV-2 infection |
| 3440_7    | granzyme A              | P12544 | GZMA     | chr5:55102646  | Inverse variance weighted | 4  | -0.003 | 0.031 | 9.244E-01 | 0.978 | cis | SARS-CoV-2 infection |
| 2652_15   | suPAR                   | Q03405 | PLAUR    | chr19:43670547 | Inverse variance weighted | 2  | 0.004  | 0.038 | 9.255E-01 | 0.978 | cis | SARS-CoV-2 infection |
| 18280_29  | DTD2                    | Q96FN9 | DTD2     | chr14:31457506 | Inverse variance weighted | 2  | -0.004 | 0.039 | 9.260E-01 | 0.978 | cis | SARS-CoV-2 infection |
| 10835_25  | AAGCT                   | Q9UNA3 | AAGNT    | chr3:138132390 | Wald ratio                | 1  | 0.007  | 0.075 | 9.267E-01 | 0.978 | cis | SARS-CoV-2 infection |
| 6077_63   | CECR1                   | Q9NZK5 | ADA2     | chr22:17258235 | Inverse variance weighted | 5  | -0.001 | 0.012 | 9.278E-01 | 0.978 | cis | SARS-CoV-2 infection |
| 10816_150 | PILRA isoform FDF03-M14 | Q9UKJ1 | PILRA    | chr7:100367530 | Inverse variance weighted | 3  | -0.004 | 0.046 | 9.279E-01 | 0.978 | cis | SARS-CoV-2 infection |
| 13123_3   | FLRT3:ECD               | Q9NZU0 | FLRT3    | chr20:14337614 | Inverse variance weighted | 6  | 0.001  | 0.008 | 9.281E-01 | 0.978 | cis | SARS-CoV-2 infection |
| 8039_41   | F177A                   | Q8N128 | FAM177A1 | chr14:35045117 | Inverse variance weighted | 6  | 0.001  | 0.012 | 9.282E-01 | 0.978 | cis | SARS-CoV-2 infection |
| 9282_12   | CRIS2                   | P16562 | CRISP2   | chr6:49713590  | Inverse variance weighted | 6  | -0.001 | 0.009 | 9.282E-01 | 0.978 | cis | SARS-CoV-2 infection |
| 2516_57   | 6Kine                   | O00585 | CLL21    | chr9:34710136  | Inverse variance weighted | 2  | 0.004  | 0.040 | 9.283E-01 | 0.978 | cis | SARS-CoV-2 infection |
| 18397_5   | AK1C4                   | P17516 | AKR1C4   | chr10:5195462  | Inverse variance weighted | 8  | 0.001  | 0.014 | 9.285E-01 | 0.978 | cis | SARS-CoV-2 infection |
| 19254_125 | GMMPR1                  | P36959 | GMMPR    | chr6:16238587  | Inverse variance weighted | 8  | 0.001  | 0.007 | 9.289E-01 | 0.978 | cis | SARS-CoV-2 infection |
| 8778_3    | Noggin                  | Q13253 | NOG      | chr17:56593699 | Inverse variance weighted | 5  | -0.002 | 0.020 | 9.304E-01 | 0.978 | cis | SARS-CoV-2 infection |
| 7808_5    | GLCE                    | O94923 | GLCE     | chr15:69160584 | Inverse variance weighted | 7  | 0.001  | 0.011 | 9.304E-01 | 0.978 | cis | SARS-CoV-2 infection |
| 9350_3    | FTSL4                   | Q6MZW2 | FTSL4    | chr5:133612541 | Inverse variance weighted | 2  | -0.005 | 0.062 | 9.306E-01 | 0.978 | cis | SARS-CoV-2 infection |
| 8606_39   | GNPMB:CD                | Q14956 | GNPMB    | chr7:23235967  | Inverse variance weighted | 7  | 0.001  | 0.014 | 9.315E-01 | 0.978 | cis | SARS-CoV-2 infection |
| 3221_54   | SARP-2                  | Q8N474 | SRFP1    | chr8:41309473  | Inverse variance weighted | 3  | -0.002 | 0.022 | 9.317E-01 | 0.978 | cis | SARS-CoV-2 infection |
| 11428_31  | PDUI1                   | O00151 | PDUI1    | chr10:95291012 | Wald ratio                | 1  | -0.006 | 0.066 | 9.318E-01 | 0.978 | cis | SARS-CoV-2 infection |
| 17702_53  | UGT 1A1                 | P22309 | UGT1A1   | chr2:233760270 | Inverse variance weighted | 2  | 0.007  | 0.083 | 9.323E-01 | 0.978 | cis | SARS-CoV-2 infection |
| 8274_64   | Syntaxin-7              | O15400 | STX7     | chr6:132513198 | Wald ratio                | 1  | -0.003 | 0.040 | 9.324E-01 | 0.978 | cis | SARS-CoV-2 infection |
| 4133_54   | Granzyme B              | P10144 | GZMB     | chr14:24634267 | Wald ratio                | 1  | 0.004  | 0.053 | 9.325E-01 | 0.978 | cis | SARS-CoV-2 infection |
| 11140_56  | CO1A1:C-term propeptide | P02452 | COL1A1   | chr17:50201632 | Inverse variance weighted | 3  | 0.003  | 0.030 | 9.330E-01 | 0.978 | cis | SARS-CoV-2 infection |
| 3367_8    | FETUB                   | Q9UGM5 | FETUB    | chr3:186635969 | Inverse variance weighted | 5  | -0.002 | 0.026 | 9.331E-01 | 0.978 | cis | SARS-CoV-2 infection |
| 19293_6   | VP26A                   | O75436 | VPS26A   | chr10:69123512 | Wald ratio                | 1  | 0.002  | 0.030 | 9.332E-01 | 0.978 | cis | SARS-CoV-2 infection |
| 5508_62   | Cathepsin D             | P07339 | CTSD     | chr11:1764573  | Inverse variance weighted | 5  | 0.002  | 0.019 | 9.338E-01 | 0.978 | cis | SARS-CoV-2 infection |
| 12646_2   | RPE                     | Q96AT9 | RPE      | chr2:210002565 | Wald ratio                | 1  | 0.005  | 0.061 | 9.341E-01 | 0.978 | cis | SARS-CoV-2 infection |
| 3210_1    | METAP1                  | P53582 | METAP1   | chr4:98995659  | Wald ratio                | 1  | 0.008  | 0.097 | 9.350E-01 | 0.978 | cis | SARS-CoV-2 infection |
| 3173_49   | ASAH1                   | Q02083 | NAAA     | chr4:75941013  | Inverse variance weighted | 10 | 0.002  | 0.019 | 9.350E-01 | 0.978 | cis | SARS-CoV-2 infection |
| 10714_7   | ACE                     | P12821 | ACE      | chr17:63477061 | Inverse variance weighted | 11 | -0.001 | 0.008 | 9.371E-01 | 0.980 | cis | SARS-CoV-2 infection |
| 11681_8   | NUPL                    | P52594 | AGFG1    | chr2:227472152 | Wald ratio                | 1  | 0.004  | 0.054 | 9.387E-01 | 0.981 | cis | SARS-CoV-2 infection |
| 15635_4   | SMOC2                   | Q9H3U7 | SMOC2    | chr6:168441151 | Inverse variance weighted | 5  | 0.001  | 0.015 | 9.403E-01 | 0.982 | cis | SARS-CoV-2 infection |
| 6448_36   | Sema E                  | Q99985 | SEMA3C   | chr7:80922359  | Inverse variance weighted | 2  | 0.003  | 0.040 | 9.411E-01 | 0.982 | cis | SARS-CoV-2 infection |
| 13954_9   | GN1A                    | Q96K66 | GNPNAT1  | chr14:52791668 | Wald ratio                | 1  | -0.006 | 0.083 | 9.421E-01 | 0.982 | cis | SARS-CoV-2 infection |
| 5112_73   | OX2G                    | P41217 | CD200    | chr3:112332347 | Wald ratio                | 1  | 0.004  | 0.060 | 9.436E-01 | 0.983 | cis | SARS-CoV-2 infection |
| 6925_26   | SNX8                    | Q9Y5X2 | SNX8     | chr7:2354318   | Inverse variance weighted | 2  | -0.004 | 0.058 | 9.453E-01 | 0.984 | cis | SARS-CoV-2 infection |
| 9335_28   | PSG9                    | Q00887 | PSG9     | chr19:43269530 | Wald ratio                | 1  | -0.004 | 0.064 | 9.461E-01 | 0.985 | cis | SARS-CoV-2 infection |
| 12469_19  | MARE1                   | Q15691 | MAPRE1   | chr20:32819954 | Wald ratio                | 1  | -0.006 | 0.092 | 9.469E-01 | 0.985 | cis | SARS-CoV-2 infection |
| 5129_12   | SREC-I                  | Q14162 | SCARF1   | chr17:1645744  | Inverse variance weighted | 5  | 0.001  | 0.017 | 9.485E-01 | 0.986 | cis | SARS-CoV-2 infection |
| 11378_37  | KSYP:SH2, 1 and 2       | P43405 | SYK      | chr9:90801787  | Wald ratio                | 1  | 0.006  | 0.101 | 9.494E-01 | 0.986 | cis | SARS-CoV-2 infection |
| 6451_64   | ASP1                    | Q9BXN1 | ASP1     | chr9:92482506  | Inverse variance weighted | 8  | -0.002 | 0.027 | 9.495E-01 | 0.986 | cis | SARS-CoV-2 infection |
| 17170_15  | CALCB                   | P10092 | CALCB    | chr11:14904997 | Inverse variance weighted | 2  | -0.001 | 0.021 | 9.508E-01 | 0.986 | cis | SARS-CoV-2 infection |
| 5963_9    | Dermokine               | Q6E0U4 | DMKN     | chr19:35513658 | Wald ratio                | 1  | 0.005  | 0.082 | 9.529E-01 | 0.986 | cis | SARS-CoV-2 infection |
| 19561_216 | PLXD1                   | Q9Y407 | PLXND1   | chr3:129606676 | Inverse variance weighted | 4  | 0.001  | 0.021 | 9.535E-01 | 0.986 | cis | SARS-CoV-2 infection |
| 7628_40   | CREL1                   | Q96H01 | CRELD1   | chr3:9933793   | Inverse variance weighted | 12 | 0.001  | 0.010 | 9.546E-01 | 0.986 | cis | SARS-CoV-2 infection |
| 14273_19  | PPCE                    | P48147 | PREP     | chr6:105454062 | Inverse variance weighted | 2  | 0.002  | 0.028 | 9.546E-01 | 0.986 | cis | SARS-CoV-2 infection |
| 5688_65   | CBLN4                   | Q9NTU7 | CBLN4    | chr20:56005519 | Inverse variance weighted | 5  | -0.001 | 0.022 | 9.571E-01 | 0.986 | cis | SARS-CoV-2 infection |
| 17692_2   | BT3A3                   | O00478 | BTN3A3   | chr6:26440472  | Inverse variance weighted | 10 | 0.000  | 0.009 | 9.579E-01 | 0.986 | cis | SARS-CoV-2 infection |



|           |                                 |                                                                                              |        |          |    |                           |    |        |       |           |       |     |                 |
|-----------|---------------------------------|----------------------------------------------------------------------------------------------|--------|----------|----|---------------------------|----|--------|-------|-----------|-------|-----|-----------------|
| 6404_20   | C1QRF                           | C1q-related factor                                                                           | O75973 | C1QL1    | NA | Inverse variance weighted | 7  | -0.191 | 0.057 | 7.413E-04 | 0.398 | pan | Severe COVID-19 |
| 17769_28  | PCNP                            | PEST proteolytic signal-containing nuclear protein                                           | Q8WW12 | PCNP     | NA | Wald ratio                | 1  | -0.549 | 0.170 | 1.255E-03 | 0.459 | pan | Severe COVID-19 |
| 12534_10  | CAC02                           | Calcium-binding and coiled-coil domain-containing protein 2                                  | Q13137 | CALCOCO2 | NA | Wald ratio                | 1  | -0.541 | 0.170 | 1.455E-03 | 0.459 | pan | Severe COVID-19 |
| 10554_23  | BGAL                            | Beta-galactosidase                                                                           | P16278 | GLB1     | NA | Wald ratio                | 1  | 1.060  | 0.337 | 1.662E-03 | 0.459 | pan | Severe COVID-19 |
| 2737_22   | NovH                            | Protein NOV homolog                                                                          | P48745 | CN3      | NA | Wald ratio                | 1  | 1.103  | 0.352 | 1.710E-03 | 0.459 | pan | Severe COVID-19 |
| 8255_34   | MRV1                            | Protein MRV1                                                                                 | Q9Y6F6 | IRAG1    | NA | Inverse variance weighted | 2  | -0.380 | 0.124 | 2.121E-03 | 0.476 | pan | Severe COVID-19 |
| 6955_68   | SNX1                            | Sorting nexin-1                                                                              | Q13596 | SNX1     | NA | Wald ratio                | 1  | -0.348 | 0.114 | 2.214E-03 | 0.476 | pan | Severe COVID-19 |
| 9017_58   | LPH                             | Lactase-phlorizin hydrolase                                                                  | P09848 | LCT      | NA | Inverse variance weighted | 14 | -0.079 | 0.026 | 2.622E-03 | 0.512 | pan | Severe COVID-19 |
| 9834_62   | ADH1B                           | Alcohol dehydrogenase 1B                                                                     | P00325 | ADH1B    | NA | Wald ratio                | 1  | 0.395  | 0.135 | 3.365E-03 | 0.602 | pan | Severe COVID-19 |
| 18380_78  | Albumin                         | Serum albumin                                                                                | P02768 | ALB      | NA | Inverse variance weighted | 2  | 0.744  | 0.257 | 3.775E-03 | 0.624 | pan | Severe COVID-19 |
| 19446_1   | GMPR2                           | GMP reductase 2                                                                              | Q9P271 | GMPR2    | NA | Inverse variance weighted | 2  | 0.195  | 0.069 | 4.549E-03 | 0.630 | pan | Severe COVID-19 |
| 10440_26  | ACAM:ECD                        | CXADR-like membrane protein:Extracellular domain                                             | Q9H6B4 | CLMP     | NA | Inverse variance weighted | 3  | 0.201  | 0.071 | 4.689E-03 | 0.630 | pan | Severe COVID-19 |
| 4541_49   | CDON                            | Cell adhesion molecule-related/down-regulated by oncogenes                                   | Q4KMGO | CDON     | NA | Inverse variance weighted | 5  | 0.111  | 0.039 | 5.017E-03 | 0.630 | pan | Severe COVID-19 |
| 13434_172 | PARVA                           | Alpha-parvin                                                                                 | Q9NVD7 | PARVA    | NA | Wald ratio                | 1  | -0.475 | 0.172 | 5.659E-03 | 0.630 | pan | Severe COVID-19 |
| 10560_1   | ITM2C:N-term                    | Integral membrane protein 2C:N-term                                                          | Q9NQX7 | ITM2C    | NA | Wald ratio                | 1  | 1.011  | 0.366 | 5.743E-03 | 0.630 | pan | Severe COVID-19 |
| 10008_43  | GUC1A                           | Guanylyl cyclase-activating protein 1                                                        | P43080 | GUC1A    | NA | Inverse variance weighted | 2  | 0.907  | 0.332 | 6.328E-03 | 0.630 | pan | Severe COVID-19 |
| 12820_1   | GRAP                            | GRB2-related adapter protein                                                                 | Q13588 | GRAP     | NA | Inverse variance weighted | 2  | -0.443 | 0.164 | 7.006E-03 | 0.630 | pan | Severe COVID-19 |
| 6528_95   | EXTL2                           | Exostosin-like 2                                                                             | Q9UBQ6 | EXTL2    | NA | Wald ratio                | 1  | 0.853  | 0.317 | 7.196E-03 | 0.630 | pan | Severe COVID-19 |
| 8464_31   | RSP04                           | R-spondin-4                                                                                  | Q2IOM5 | RSP04    | NA | Inverse variance weighted | 3  | 0.381  | 0.142 | 7.203E-03 | 0.630 | pan | Severe COVID-19 |
| 10620_21  | PSP-94                          | Beta-microseminoprotein                                                                      | P08118 | MSMB     | NA | Inverse variance weighted | 19 | -0.062 | 0.023 | 7.554E-03 | 0.630 | pan | Severe COVID-19 |
| 9590_10   | COX7R                           | Cytochrome c oxidase subunit 7A-related protein, mitochondrial                               | Q14548 | COX7A2L  | NA | Wald ratio                | 1  | 0.962  | 0.360 | 7.575E-03 | 0.630 | pan | Severe COVID-19 |
| 6930_95   | SIARF                           | Alpha-2,8-sialyltransferase 8F                                                               | P61647 | ST8SIA6  | NA | Wald ratio                | 1  | -0.808 | 0.303 | 7.670E-03 | 0.630 | pan | Severe COVID-19 |
| 8923_94   | GLTL1                           | Polypeptide N-acetylgalactosaminyltransferase 16                                             | Q8NA28 | GALNT16  | NA | Inverse variance weighted | 4  | -0.201 | 0.076 | 8.165E-03 | 0.630 | pan | Severe COVID-19 |
| 3708_62   | a2-Macroglobulin                | Alpha-2-macroglobulin                                                                        | P01023 | A2M      | NA | Inverse variance weighted | 2  | -0.488 | 0.185 | 8.271E-03 | 0.630 | pan | Severe COVID-19 |
| 16613_3   | CAD17                           | Cadherin-17                                                                                  | Q12864 | CDH17    | NA | Inverse variance weighted | 16 | 0.113  | 0.043 | 8.698E-03 | 0.630 | pan | Severe COVID-19 |
| 10722_13  | KSYK:Protein Kinase             | Tyrosine-protein kinase SYK:Protein kinase domain                                            | P43405 | SYK      | NA | Wald ratio                | 1  | 0.751  | 0.288 | 9.213E-03 | 0.630 | pan | Severe COVID-19 |
| 3009_3    | TGF-b R III                     | Transforming growth factor beta receptor type 3                                              | Q03167 | TGFBFR3  | NA | Inverse variance weighted | 6  | -0.199 | 0.077 | 9.491E-03 | 0.630 | pan | Severe COVID-19 |
| 15339_32  | COF2                            | Cofilin-2                                                                                    | Q9Y281 | CFI2     | NA | Wald ratio                | 1  | 0.328  | 0.127 | 1.013E-02 | 0.630 | pan | Severe COVID-19 |
| 13992_12  | NSF                             | Vesicle-fusing ATPase                                                                        | P46459 | NSF      | NA | Wald ratio                | 1  | -0.683 | 0.266 | 1.031E-02 | 0.630 | pan | Severe COVID-19 |
| 8768_4    | Bcl-10                          | B-cell lymphoma/leukemia 10                                                                  | O95999 | BCL10    | NA | Wald ratio                | 1  | 1.040  | 0.406 | 1.042E-02 | 0.630 | pan | Severe COVID-19 |
| 9359_9    | EGFL9                           | Protein delta homolog 2                                                                      | Q6UJY1 | DLK2     | NA | Wald ratio                | 1  | -0.224 | 0.087 | 1.058E-02 | 0.630 | pan | Severe COVID-19 |
| 16792_4   | Siglec-5                        | Sialic acid-binding Ig-like lectin 5                                                         | O15389 | SIGLEC5  | NA | Inverse variance weighted | 7  | 0.110  | 0.043 | 1.082E-02 | 0.630 | pan | Severe COVID-19 |
| 14007_22  | PAPS1                           | Bifunctional 3'-phosphoadenosine 5'-phosphosulfate synthase 1                                | O43252 | PAPS51   | NA | Inverse variance weighted | 2  | -0.215 | 0.085 | 1.096E-02 | 0.630 | pan | Severe COVID-19 |
| 15529_33  | Cysteine-rich protein 1         | Cysteine and glycine-rich protein 1                                                          | P21291 | CSRP1    | NA | Inverse variance weighted | 2  | -0.523 | 0.206 | 1.108E-02 | 0.630 | pan | Severe COVID-19 |
| 8100_15   | ADM2                            | ADM2                                                                                         | Q724H4 | ADM2     | NA | Wald ratio                | 1  | 0.981  | 0.389 | 1.177E-02 | 0.630 | pan | Severe COVID-19 |
| 14636_25  | Ribonuclease UK114              | Ribonuclease UK114                                                                           | P52758 | RIDA     | NA | Inverse variance weighted | 4  | -0.137 | 0.055 | 1.202E-02 | 0.630 | pan | Severe COVID-19 |
| 5128_53   | SLAF6                           | SLAM family member 6                                                                         | Q96DU3 | SLAMF6   | NA | Wald ratio                | 1  | -0.213 | 0.085 | 1.202E-02 | 0.630 | pan | Severe COVID-19 |
| 6462_12   | TIMP-4                          | Metalloproteinase inhibitor 4                                                                | Q99727 | TIMP4    | NA | Inverse variance weighted | 8  | -0.108 | 0.043 | 1.269E-02 | 0.630 | pan | Severe COVID-19 |
| 11557_3   | SMUF1                           | E3 ubiquitin-protein ligase SMURF1                                                           | Q9HCE7 | SMURF1   | NA | Wald ratio                | 1  | 0.311  | 0.125 | 1.270E-02 | 0.630 | pan | Severe COVID-19 |
| 4157_2    | Thrombin                        | Thrombin                                                                                     | P00734 | F2       | NA | Inverse variance weighted | 6  | 0.233  | 0.094 | 1.279E-02 | 0.630 | pan | Severe COVID-19 |
| 4188_1    | Aflatoxin B1 aldehyde reductase | Aflatoxin B1 aldehyde reductase member 2                                                     | O43488 | AKR7A2   | NA | Wald ratio                | 1  | 0.246  | 0.099 | 1.316E-02 | 0.630 | pan | Severe COVID-19 |
| 13393_46  | DERL1                           | Derlin-1                                                                                     | Q9BUH8 | DERL1    | NA | Wald ratio                | 1  | 0.773  | 0.314 | 1.381E-02 | 0.630 | pan | Severe COVID-19 |
| 19365_11  | BCAT2                           | Branched-chain-amino-acid aminotransferase, mitochondrial                                    | O15382 | BCAT2    | NA | Inverse variance weighted | 2  | 0.272  | 0.111 | 1.423E-02 | 0.630 | pan | Severe COVID-19 |
| 16753_46  | CO6A2                           | Collagen alpha-2(VI) chain                                                                   | P12110 | COL6A2   | NA | Inverse variance weighted | 5  | -0.208 | 0.085 | 1.436E-02 | 0.630 | pan | Severe COVID-19 |
| 8269_327  | ARSK                            | Arylsulfatase K                                                                              | Q6UWY0 | ARSK     | NA | Inverse variance weighted | 2  | 0.507  | 0.208 | 1.469E-02 | 0.630 | pan | Severe COVID-19 |
| 5900_11   | HINT1                           | Histidine triad nucleotide-binding protein 1                                                 | P49773 | HINT1    | NA | Wald ratio                | 1  | 0.515  | 0.212 | 1.500E-02 | 0.630 | pan | Severe COVID-19 |
| 18435_40  | UBX2B                           | UBX domain-containing protein 2B                                                             | Q14CS0 | UBXN2B   | NA | Wald ratio                | 1  | -0.610 | 0.251 | 1.501E-02 | 0.630 | pan | Severe COVID-19 |
| 6414_8    | OAF                             | Out at first protein homolog                                                                 | Q86UD1 | OAF      | NA | Inverse variance weighted | 6  | 0.119  | 0.049 | 1.511E-02 | 0.630 | pan | Severe COVID-19 |
| 8353_15   | SCN2B                           | Sodium channel subunit beta-2                                                                | O60939 | SCN2B    | NA | Inverse variance weighted | 6  | -0.331 | 0.137 | 1.547E-02 | 0.630 | pan | Severe COVID-19 |
| 18909_11  | EXOS8                           | Exosome complex component RRP43                                                              | Q96B26 | EXOSC8   | NA | Wald ratio                | 1  | -0.544 | 0.225 | 1.563E-02 | 0.630 | pan | Severe COVID-19 |
| 12656_1   | KLC1                            | Kinesin light chain 1                                                                        | Q07866 | KLC1     | NA | Wald ratio                | 1  | 0.897  | 0.372 | 1.584E-02 | 0.630 | pan | Severe COVID-19 |
| 19279_42  | CRBP                            | Retinol-binding protein 1                                                                    | P09455 | RBP1     | NA | Wald ratio                | 1  | 0.554  | 0.232 | 1.682E-02 | 0.632 | pan | Severe COVID-19 |
| 19383_131 | CINP                            | Cyclin-dependent kinase 2-interacting protein                                                | Q9BW66 | CINP     | NA | Wald ratio                | 1  | 0.666  | 0.279 | 1.707E-02 | 0.632 | pan | Severe COVID-19 |
| 4249_64   | NDP kinase B                    | Nucleoside diphosphate kinase B                                                              | P22392 | NME2     | NA | Wald ratio                | 1  | 0.315  | 0.133 | 1.783E-02 | 0.632 | pan | Severe COVID-19 |
| 8786_6    | F171B:ECD                       | Protein FAM171B:Extracellular domain                                                         | Q6P995 | FAM171B  | NA | Wald ratio                | 1  | 0.231  | 0.097 | 1.786E-02 | 0.632 | pan | Severe COVID-19 |
| 19617_5   | LTB4DH                          | Prostaglandin reductase 1                                                                    | Q14914 | PTGR1    | NA | Inverse variance weighted | 12 | -0.075 | 0.032 | 1.804E-02 | 0.632 | pan | Severe COVID-19 |
| 16620_26  | LY75                            | Lymphocyte antigen 75                                                                        | O60449 | LY75     | NA | Inverse variance weighted | 19 | -0.078 | 0.033 | 1.807E-02 | 0.632 | pan | Severe COVID-19 |
| 8340_9    | DB110                           | Beta-defensin 110                                                                            | Q30KQ9 | DEFB110  | NA | Wald ratio                | 1  | -0.711 | 0.301 | 1.812E-02 | 0.632 | pan | Severe COVID-19 |
| 9931_20   | Keratin-1                       | Keratin, type II cytoskeletal 1                                                              | P04264 | KRT1     | NA | Inverse variance weighted | 2  | -0.636 | 0.269 | 1.823E-02 | 0.632 | pan | Severe COVID-19 |
| 11094_104 | LPPL                            | Galectin-10                                                                                  | Q05315 | CLC      | NA | Wald ratio                | 1  | 0.544  | 0.233 | 1.935E-02 | 0.638 | pan | Severe COVID-19 |
| 16919_1   | ACBP                            | Acyl-CoA-binding protein                                                                     | P07108 | DBI      | NA | Inverse variance weighted | 4  | 0.306  | 0.131 | 1.946E-02 | 0.638 | pan | Severe COVID-19 |
| 8795_48   | TR:ECD                          | Transferrin receptor protein 1:Extracellular domain                                          | P02786 | TFR      | NA | Inverse variance weighted | 5  | 0.221  | 0.095 | 1.962E-02 | 0.638 | pan | Severe COVID-19 |
| 13669_6   | FGFR-3:ECD                      | Fibroblast growth factor receptor 3:Extracellular domain                                     | P22607 | GFGR3    | NA | Inverse variance weighted | 3  | -0.210 | 0.090 | 1.988E-02 | 0.638 | pan | Severe COVID-19 |
| 15653_9   | COAA1                           | Collagen alpha-1(X) chain                                                                    | Q03692 | COL10A1  | NA | Inverse variance weighted | 4  | -0.148 | 0.063 | 1.989E-02 | 0.638 | pan | Severe COVID-19 |
| 11825_27  | PRGC1                           | Peroxisome proliferator-activated receptor gamma coactivator 1-alpha                         | Q9UBK2 | PPARGC1A | NA | Wald ratio                | 1  | 0.755  | 0.326 | 2.059E-02 | 0.650 | pan | Severe COVID-19 |
| 16918_198 | TLR3                            | Toll-like receptor 3                                                                         | O15455 | TLR3     | NA | Inverse variance weighted | 9  | 0.097  | 0.042 | 2.163E-02 | 0.673 | pan | Severe COVID-19 |
| 9580_5    | Laminin gamma-2                 | Laminin subunit gamma-2                                                                      | Q13753 | LAMC2    | NA | Inverse variance weighted | 8  | -0.122 | 0.054 | 2.321E-02 | 0.712 | pan | Severe COVID-19 |
| 19127_1   | HSPB6                           | Heat shock protein beta-6                                                                    | Q14558 | HSPB6    | NA | Wald ratio                | 1  | 0.825  | 0.365 | 2.394E-02 | 0.724 | pan | Severe COVID-19 |
| 3342_76   | ABL2                            | Abelson tyrosine-protein kinase 2                                                            | P42684 | ABL2     | NA | Wald ratio                | 1  | -0.731 | 0.326 | 2.468E-02 | 0.730 | pan | Severe COVID-19 |
| 4924_32   | MMP-1                           | Interstitial collagenase                                                                     | P03956 | MMP1     | NA | Inverse variance weighted | 12 | 0.096  | 0.043 | 2.482E-02 | 0.730 | pan | Severe COVID-19 |
| 5078_82   | EphB6                           | Ephrin type-B receptor 6                                                                     | O15197 | EPHB6    | NA | Inverse variance weighted | 4  | 0.152  | 0.068 | 2.516E-02 | 0.730 | pan | Severe COVID-19 |
| 4430_44   | Collectin Kidney 1              | Collectin-11                                                                                 | Q9BW98 | COLEC11  | NA | Inverse variance weighted | 11 | 0.151  | 0.068 | 2.559E-02 | 0.733 | pan | Severe COVID-19 |
| 3181_50   | Cathepsin S                     | Cathepsin S                                                                                  | P25774 | CTSS     | NA | Inverse variance weighted | 12 | -0.129 | 0.058 | 2.603E-02 | 0.733 | pan | Severe COVID-19 |
| 14123_34  | GI24:ECD                        | V-type immunoglobulin domain-containing suppressor of T-cell activation:Extracellular domain | Q9H7M9 | VSIR     | NA | Inverse variance weighted | 6  | -0.295 | 0.133 | 2.632E-02 | 0.733 | pan | Severe COVID-19 |
| 12428_2   | LYPL1                           | Lysophospholipase-like protein 1                                                             | Q5VWL2 | LYPLA1   | NA | Wald ratio                | 1  | 0.325  | 0.147 | 2.676E-02 | 0.733 | pan | Severe COVID-19 |
| 12583_77  | ARAF                            | Serine/threonine-protein kinase A-Raf                                                        | P10398 | ARAF     | NA | Wald ratio                | 1  | -0.632 | 0.286 | 2.695E-02 | 0.733 | pan | Severe COVID-19 |
| 19207_119 | ADK                             | Adenosine kinase                                                                             | P55263 | ADK      | NA | Wald ratio                | 1  | 0.627  | 0.286 | 2.842E-02 | 0.760 | pan | Severe COVID-19 |
| 8885_6    | CA2D3                           | Voltage-dependent calcium channel subunit alpha-2/delta-3                                    | Q8I2S8 | CACNA2D3 | NA | Inverse variance weighted | 9  | -0.112 | 0.051 | 2.947E-02 | 0.760 | pan | Severe COVID-19 |

|           |                                   |                                                                                                                                    |        |           |    |                           |    |        |       |           |       |     |                 |
|-----------|-----------------------------------|------------------------------------------------------------------------------------------------------------------------------------|--------|-----------|----|---------------------------|----|--------|-------|-----------|-------|-----|-----------------|
| 9962_1    | MUCDL                             | Cadherin-related family member 5                                                                                                   | Q9HB88 | CDHR5     | NA | Wald ratio                | 1  | -0.579 | 0.266 | 2.949E-02 | 0.760 | pan | Severe COVID-19 |
| 5440_26   | Troponin I, skeletal, fast twitch | Troponin I, fast skeletal muscle                                                                                                   | P48788 | TNNI2     | NA | Wald ratio                | 1  | -0.676 | 0.311 | 2.950E-02 | 0.760 | pan | Severe COVID-19 |
| 6416_8    | GKN2                              | Gastrokeine-2                                                                                                                      | Q86XP6 | GKN2      | NA | Inverse variance weighted | 10 | -0.153 | 0.071 | 2.996E-02 | 0.760 | pan | Severe COVID-19 |
| 2864_2    | MEK1                              | Dual specificity mitogen-activated protein kinase kinase 1                                                                         | Q02750 | MAP2K1    | NA | Wald ratio                | 1  | 0.672  | 0.310 | 3.007E-02 | 0.760 | pan | Severe COVID-19 |
| 10511_10  | Collagen alpha-3(VI):isoform 3    | Collagen alpha-3(VI) chain:isoform 3                                                                                               | P12111 | COL6A3    | NA | Inverse variance weighted | 2  | 0.397  | 0.184 | 3.125E-02 | 0.770 | pan | Severe COVID-19 |
| 17806_6   | Syntenin 1                        | Syntenin-1                                                                                                                         | Q00560 | SDCBP     | NA | Wald ratio                | 1  | 0.701  | 0.327 | 3.172E-02 | 0.770 | pan | Severe COVID-19 |
| 13107_9   | LYPD3                             | Ly6/PLAUR domain-containing protein 3                                                                                              | O95274 | LYPD3     | NA | Inverse variance weighted | 3  | -0.367 | 0.171 | 3.177E-02 | 0.770 | pan | Severe COVID-19 |
| 3378_49   | Kallikrein 7                      | Kallikrein-7                                                                                                                       | P49862 | KLK7      | NA | Inverse variance weighted | 2  | -0.224 | 0.105 | 3.197E-02 | 0.770 | pan | Severe COVID-19 |
| 6388_21   | CC126                             | Coiled-coil domain-containing protein 126                                                                                          | Q96EE4 | CCDC126   | NA | Inverse variance weighted | 6  | 0.153  | 0.072 | 3.225E-02 | 0.770 | pan | Severe COVID-19 |
| 17460_51  | Mx1                               | Interferon-induced GTP-binding protein Mx1                                                                                         | P20591 | MX1       | NA | Inverse variance weighted | 9  | -0.132 | 0.062 | 3.431E-02 | 0.790 | pan | Severe COVID-19 |
| 10608_9   | HIS1                              | Histatin-1                                                                                                                         | P15515 | HTN1      | NA | Inverse variance weighted | 2  | 0.221  | 0.104 | 3.471E-02 | 0.790 | pan | Severe COVID-19 |
| 16596_25  | GLRX3                             | Glutaredoxin-3                                                                                                                     | O76003 | GLRX3     | NA | Wald ratio                | 1  | -0.388 | 0.184 | 3.516E-02 | 0.790 | pan | Severe COVID-19 |
| 15513_108 | Prostasin                         | Prostasin                                                                                                                          | Q16651 | PRSS8     | NA | Wald ratio                | 1  | 0.663  | 0.316 | 3.556E-02 | 0.790 | pan | Severe COVID-19 |
| 16605_2   | C1T9A                             | Complement C1q and tumor necrosis factor-related protein 9A                                                                        | P0C862 | C1QTNF9   | NA | Wald ratio                | 1  | 0.209  | 0.099 | 3.560E-02 | 0.790 | pan | Severe COVID-19 |
| 13936_24  | PGK2                              | Phosphoglycerate kinase 2                                                                                                          | P07205 | PGK2      | NA | Wald ratio                | 1  | 0.408  | 0.194 | 3.561E-02 | 0.790 | pan | Severe COVID-19 |
| 5229_90   | IMDH1                             | Inosine-5'-monophosphate dehydrogenase 1                                                                                           | P20839 | IMPDH1    | NA | Inverse variance weighted | 9  | -0.220 | 0.105 | 3.653E-02 | 0.790 | pan | Severe COVID-19 |
| 3518_54   | TAFI                              | Carboxypeptidase B2                                                                                                                | Q96IY4 | CPB2      | NA | Inverse variance weighted | 8  | 0.189  | 0.090 | 3.686E-02 | 0.790 | pan | Severe COVID-19 |
| 14204_55  | FOXJ2                             | Forkhead box protein J2                                                                                                            | Q9POK8 | FOXJ2     | NA | Inverse variance weighted | 3  | -0.353 | 0.169 | 3.689E-02 | 0.790 | pan | Severe COVID-19 |
| 13438_115 | CHRD                              | Chordin                                                                                                                            | Q9H2X0 | CHRD      | NA | Wald ratio                | 1  | -0.429 | 0.206 | 3.746E-02 | 0.790 | pan | Severe COVID-19 |
| 15375_49  | Carboxypeptidase B1               | Carboxypeptidase B                                                                                                                 | P15086 | CPB1      | NA | Inverse variance weighted | 9  | 0.131  | 0.063 | 3.774E-02 | 0.790 | pan | Severe COVID-19 |
| 13973_62  | TTL                               | Tubulin-tyrosine ligase                                                                                                            | Q8NG68 | TTL       | NA | Wald ratio                | 1  | 0.554  | 0.267 | 3.782E-02 | 0.790 | pan | Severe COVID-19 |
| 6064_4    | TXND4                             | Endoplasmic reticulum resident protein 44                                                                                          | Q9BS26 | ERP44     | NA | Inverse variance weighted | 3  | 0.419  | 0.202 | 3.788E-02 | 0.790 | pan | Severe COVID-19 |
| 5095_21   | KI2L4                             | Killer cell immunoglobulin-like receptor 2DL4                                                                                      | Q99706 | KIR2DL4   | NA | Wald ratio                | 1  | -0.486 | 0.235 | 3.893E-02 | 0.803 | pan | Severe COVID-19 |
| 5867_60   | ARGI1                             | Arginase-1                                                                                                                         | P05089 | ARG1      | NA | Wald ratio                | 1  | 0.398  | 0.193 | 3.926E-02 | 0.803 | pan | Severe COVID-19 |
| 13435_31  | IL-20 Rb                          | Interleukin-20 receptor subunit beta                                                                                               | Q6UXLO | IL20RB    | NA | Wald ratio                | 1  | 0.610  | 0.298 | 4.080E-02 | 0.813 | pan | Severe COVID-19 |
| 16049_43  | OLR1                              | Oxidized low-density lipoprotein receptor 1                                                                                        | P78380 | OLR1      | NA | Wald ratio                | 1  | 0.524  | 0.256 | 4.091E-02 | 0.813 | pan | Severe COVID-19 |
| 2631_50   | IL-10 Rb                          | Interleukin-10 receptor subunit beta                                                                                               | Q08334 | IL10RB    | NA | Wald ratio                | 1  | 0.602  | 0.295 | 4.108E-02 | 0.813 | pan | Severe COVID-19 |
| 6925_26   | SNX8                              | Sorting nexin-8                                                                                                                    | Q9YSX2 | SNX8      | NA | Inverse variance weighted | 2  | 0.182  | 0.089 | 4.147E-02 | 0.813 | pan | Severe COVID-19 |
| 11568_2   | FKBP18                            | Peptidyl-prolyl cis-trans isomerase FKBP18                                                                                         | P68106 | FKBP18    | NA | Wald ratio                | 1  | 0.273  | 0.134 | 4.163E-02 | 0.813 | pan | Severe COVID-19 |
| 12558_3   | UBS3B                             | Ubiquitin-associated and SH3 domain-containing protein B                                                                           | Q8TF42 | UBASH3B   | NA | Inverse variance weighted | 2  | -0.224 | 0.111 | 4.305E-02 | 0.829 | pan | Severe COVID-19 |
| 9754_33   | Quinone reductase 2               | Ribosylidihydrocotinamide dehydrogenase [quinone]                                                                                  | P16083 | NQO2      | NA | Inverse variance weighted | 9  | 0.054  | 0.027 | 4.358E-02 | 0.829 | pan | Severe COVID-19 |
| 3316_58   | Heparin cofactor II               | Heparin cofactor 2                                                                                                                 | P05546 | SERPIND1  | NA | Wald ratio                | 1  | 0.598  | 0.296 | 4.360E-02 | 0.829 | pan | Severe COVID-19 |
| 6597_24   | TM157                             | Membrane protein FAM174A                                                                                                           | Q8TBP5 | FAM174A   | NA | Inverse variance weighted | 8  | -0.086 | 0.043 | 4.430E-02 | 0.830 | pan | Severe COVID-19 |
| 6022_57   | NELL2                             | Protein kinase C-binding protein NELL2                                                                                             | Q99435 | NELL2     | NA | Wald ratio                | 1  | -0.396 | 0.197 | 4.488E-02 | 0.830 | pan | Severe COVID-19 |
| 17739_1   | HCDH                              | Hydroxacyl-coenzyme A dehydrogenase, mitochondrial                                                                                 | Q16836 | HADH      | NA | Wald ratio                | 1  | -0.432 | 0.216 | 4.525E-02 | 0.830 | pan | Severe COVID-19 |
| 5735_54   | C1GLC                             | C1GALT1-specific chaperone 1                                                                                                       | Q96EU7 | C1GALT1C1 | NA | Inverse variance weighted | 3  | 0.161  | 0.081 | 4.550E-02 | 0.830 | pan | Severe COVID-19 |
| 9950_229  | LAG-3                             | Lymphocyte activation gene 3 protein                                                                                               | P18627 | LAG3      | NA | Inverse variance weighted | 4  | -0.244 | 0.122 | 4.587E-02 | 0.830 | pan | Severe COVID-19 |
| 3030_3    | DC-SIGNR                          | C-type lectin domain family 4 member M                                                                                             | Q9H2X3 | CLEC4M    | NA | Wald ratio                | 1  | 0.869  | 0.435 | 4.598E-02 | 0.830 | pan | Severe COVID-19 |
| 12707_26  | DPYL3                             | Dihydropyrimidinase-related protein 3                                                                                              | Q14195 | DPYSL3    | NA | Inverse variance weighted | 2  | 0.353  | 0.178 | 4.714E-02 | 0.837 | pan | Severe COVID-19 |
| 2741_22   | Siglec-6                          | Sialic acid-binding Ig-like lectin 6                                                                                               | Q43699 | SIGLEC6   | NA | Inverse variance weighted | 7  | -0.104 | 0.053 | 4.740E-02 | 0.837 | pan | Severe COVID-19 |
| 19240_19  | IP16:HN1                          | Gamma-interferon-inducible protein 16:isoform 2, Hematopoietic expression, interferon-inducible nature, and nuclear localization 1 | Q16666 | IF16      | NA | Wald ratio                | 1  | 0.454  | 0.229 | 4.754E-02 | 0.837 | pan | Severe COVID-19 |
| 19233_75  | ATOX1                             | Copper transport protein ATOX1                                                                                                     | Q00244 | ATOX1     | NA | Wald ratio                | 1  | 0.558  | 0.284 | 4.942E-02 | 0.843 | pan | Severe COVID-19 |
| 18931_40  | SLIT3                             | Slit homolog 3 protein                                                                                                             | O75094 | SLIT3     | NA | Inverse variance weighted | 3  | -0.184 | 0.094 | 4.947E-02 | 0.843 | pan | Severe COVID-19 |
| 8053_16   | DJB14:CD                          | DnaJ homolog subfamily B member 14:Cytoplasmic domain                                                                              | Q8TBM8 | DNAJB14   | NA | Wald ratio                | 1  | 0.491  | 0.250 | 4.958E-02 | 0.843 | pan | Severe COVID-19 |
| 3894_15   | NAGK                              | N-acetyl-D-glucosamine kinase                                                                                                      | Q9UI70 | NAGK      | NA | Inverse variance weighted | 5  | -0.165 | 0.085 | 5.168E-02 | 0.843 | pan | Severe COVID-19 |
| 9171_11   | CSRP3                             | Cysteine and glycine-rich protein 3                                                                                                | P50461 | CSRP3     | NA | Inverse variance weighted | 2  | 0.447  | 0.230 | 5.171E-02 | 0.843 | pan | Severe COVID-19 |
| 7776_20   | UNC5B                             | Netrin receptor UNC5B                                                                                                              | Q8I2J1 | UNC5B     | NA | Inverse variance weighted | 3  | -0.320 | 0.165 | 5.196E-02 | 0.843 | pan | Severe COVID-19 |
| 2731_29   | NADPH-P450 Oxidoreductase         | NADPH-cytochrome P450 reductase                                                                                                    | P16435 | POR       | NA | Inverse variance weighted | 4  | -0.225 | 0.116 | 5.220E-02 | 0.843 | pan | Severe COVID-19 |
| 12395_86  | SYDM                              | Aspartate--tRNA ligase, mitochondrial                                                                                              | Q6PI48 | DARS2     | NA | Wald ratio                | 1  | 0.612  | 0.315 | 5.236E-02 | 0.843 | pan | Severe COVID-19 |
| 18884_22  | DNJB4                             | DnaJ homolog subfamily B member 4                                                                                                  | Q9UDY4 | DNAJB4    | NA | Inverse variance weighted | 3  | 0.173  | 0.089 | 5.269E-02 | 0.843 | pan | Severe COVID-19 |
| 9829_91   | SULT 2A1                          | Bile salt sulfotransferase                                                                                                         | Q06520 | SULT2A1   | NA | Wald ratio                | 1  | -0.321 | 0.166 | 5.313E-02 | 0.843 | pan | Severe COVID-19 |
| 7178_59   | DEPP                              | Protein DEPP                                                                                                                       | Q9NTK1 | DEPP1     | NA | Inverse variance weighted | 6  | -0.163 | 0.085 | 5.473E-02 | 0.843 | pan | Severe COVID-19 |
| 5006_71   | MK13                              | Mitogen-activated protein kinase 13                                                                                                | O15264 | MAPK13    | NA | Wald ratio                | 1  | -0.389 | 0.203 | 5.529E-02 | 0.843 | pan | Severe COVID-19 |
| 15596_7   | HEX11                             | Protein HEXIM1                                                                                                                     | O94992 | HEXIM1    | NA | Wald ratio                | 1  | 0.552  | 0.288 | 5.539E-02 | 0.843 | pan | Severe COVID-19 |
| 17455_42  | FOLR1                             | Folate receptor alpha                                                                                                              | P15328 | FOLR1     | NA | Wald ratio                | 1  | -0.255 | 0.133 | 5.567E-02 | 0.843 | pan | Severe COVID-19 |
| 7932_23   | SYT8                              | Synaptotagmin-8                                                                                                                    | Q8NBV8 | SYT8      | NA | Wald ratio                | 1  | 0.640  | 0.335 | 5.612E-02 | 0.843 | pan | Severe COVID-19 |
| 8235_48   | SCG1                              | Secretogranin-1                                                                                                                    | P05060 | CHGB      | NA | Inverse variance weighted | 7  | 0.232  | 0.122 | 5.618E-02 | 0.843 | pan | Severe COVID-19 |
| 14094_29  | HB-EGF                            | Heparin-binding EGF-like growth factor                                                                                             | Q99075 | HBEGF     | NA | Inverse variance weighted | 8  | -0.228 | 0.120 | 5.696E-02 | 0.843 | pan | Severe COVID-19 |
| 18307_71  | Ppase 2                           | Inorganic pyrophosphatase 2, mitochondrial                                                                                         | Q9H2U2 | PPA2      | NA | Wald ratio                | 1  | 0.442  | 0.233 | 5.716E-02 | 0.843 | pan | Severe COVID-19 |
| 6366_38   | TXD15                             | Thioredoxin domain-containing protein 15                                                                                           | Q96I42 | TXNDC15   | NA | Inverse variance weighted | 12 | 0.080  | 0.042 | 5.737E-02 | 0.843 | pan | Severe COVID-19 |
| 6359_50   | AGO61                             | Protein O-linked-mannose beta-1,4-N-acetylglucosaminyltransferase 2                                                                | Q8NA71 | POMGNT2   | NA | Inverse variance weighted | 12 | -0.110 | 0.058 | 5.913E-02 | 0.843 | pan | Severe COVID-19 |
| 5744_12   | CA056                             | Protein MENT                                                                                                                       | Q8BUN1 | MENT      | NA | Inverse variance weighted | 4  | -0.347 | 0.184 | 5.919E-02 | 0.843 | pan | Severe COVID-19 |
| 10606_34  | TOIP1:Perinuclear                 | Torsin-1A-interacting protein 1:Perinuclear domain                                                                                 | Q5JTV8 | TOR1AIP1  | NA | Wald ratio                | 1  | 0.656  | 0.348 | 5.925E-02 | 0.843 | pan | Severe COVID-19 |
| 5124_69   | siCAM-5                           | Intercellular adhesion molecule 5                                                                                                  | Q9UMF0 | ICAM5     | NA | Inverse variance weighted | 7  | -0.225 | 0.119 | 5.957E-02 | 0.843 | pan | Severe COVID-19 |
| 17832_12  | IDI2                              | Isopentenyl-diphosphate delta-isomerase 2                                                                                          | Q9BX51 | IDI2      | NA | Inverse variance weighted | 2  | 0.179  | 0.096 | 6.175E-02 | 0.843 | pan | Severe COVID-19 |
| 7257_18   | TIP39                             | Tuberoinfundibular peptide of 39 residues                                                                                          | Q96A98 | PTH2      | NA | Wald ratio                | 1  | 0.728  | 0.390 | 6.212E-02 | 0.843 | pan | Severe COVID-19 |
| 4500_50   | SCGF-alpha                        | Stem cell growth factor-alpha                                                                                                      | Q9Y240 | CLEC11A   | NA | Inverse variance weighted | 8  | -0.071 | 0.038 | 6.216E-02 | 0.843 | pan | Severe COVID-19 |
| 5621_64   | THSD1                             | Thrombospondin type-1 domain-containing protein 1                                                                                  | Q9NS62 | THSD1     | NA | Inverse variance weighted | 13 | 0.072  | 0.038 | 6.280E-02 | 0.843 | pan | Severe COVID-19 |
| 17680_12  | EPHB1                             | Ephrin type-B receptor 1                                                                                                           | P54762 | EPHB1     | NA | Inverse variance weighted | 3  | 0.080  | 0.043 | 6.295E-02 | 0.843 | pan | Severe COVID-19 |
| 9173_21   | PGM1                              | Phosphoglucomutase-1                                                                                                               | P36871 | PGM1      | NA | Wald ratio                | 1  | 0.341  | 0.185 | 6.480E-02 | 0.843 | pan | Severe COVID-19 |
| 3044_3    | PARC                              | C-C motif chemokine 18                                                                                                             | P55774 | CCL18     | NA | Inverse variance weighted | 9  | -0.157 | 0.085 | 6.481E-02 | 0.843 | pan | Severe COVID-19 |
| 10435_2   | ASPG                              | N(4)-(beta-N-acetylglucosaminy)-L-asparaginase                                                                                     | P20933 | AGA       | NA | Inverse variance weighted | 2  | 0.437  | 0.237 | 6.493E-02 | 0.843 | pan | Severe COVID-19 |
| 16599_38  | GPN1                              | GPN-loop GTPase 1                                                                                                                  | Q9HCN4 | GPN1      | NA | Inverse variance weighted | 6  | -0.147 | 0.080 | 6.493E-02 | 0.843 | pan | Severe COVID-19 |
| 15641_20  | TEFF1                             | Tomoregulin-1                                                                                                                      | Q8IYR6 | TMEF1     | NA | Wald ratio                | 1  | -0.482 | 0.261 | 6.507E-02 | 0.843 | pan | Severe COVID-19 |
| 7891_45   | UGT 1A6                           | UDP-glucuronosyltransferase 1-6                                                                                                    | P19224 | UGT1A6    | NA | Inverse variance weighted | 4  | -0.152 | 0.083 | 6.559E-02 | 0.843 | pan | Severe COVID-19 |
| 3535_84   | DKK1                              | Dickkopf-related protein 1                                                                                                         | O94907 | DKK1      | NA | Wald ratio                | 1  | 0.587  | 0.320 | 6.655E-02 | 0.843 | pan | Severe COVID-19 |
| 7161_25   | G6PE                              | GDH/6PGL endoplasmic bifunctional protein                                                                                          | O95479 | H6PD      | NA | Inverse variance weighted | 19 | -0.065 | 0.036 | 6.686E-02 | 0.843 | pan | Severe COVID-19 |
| 12713_365 | RGS19                             | Regulator of G-protein signaling 19                                                                                                | P49795 | RGS19     | NA | Wald ratio                | 1  | 0.555  | 0.304 | 6.771E-02 | 0.843 | pan | Severe COVID-19 |

|           |                             |                                                                                            |        |            |    |                           |    |        |       |           |       |     |                 |
|-----------|-----------------------------|--------------------------------------------------------------------------------------------|--------|------------|----|---------------------------|----|--------|-------|-----------|-------|-----|-----------------|
| 8925_25   | RIR2B                       | Ribonucleoside-diphosphate reductase subunit M2 B                                          | Q7LG56 | RRM2B      | NA | Inverse variance weighted | 2  | 0.172  | 0.094 | 6.821E-02 | 0.843 | pan | Severe COVID-19 |
| 16558_2   | MYOC                        | Myocilin                                                                                   | Q99972 | MYOC       | NA | Inverse variance weighted | 9  | 0.076  | 0.042 | 6.838E-02 | 0.843 | pan | Severe COVID-19 |
| 8297_8    | DJC10                       | DnaJ homolog subfamily C member 10                                                         | Q8IXB1 | DNAJC10    | NA | Inverse variance weighted | 6  | -0.178 | 0.098 | 6.856E-02 | 0.843 | pan | Severe COVID-19 |
| 9981_18   | K1467:C-term                | Protein FAM2348:C-term                                                                     | A2RU67 | FAM2348    | NA | Inverse variance weighted | 4  | -0.175 | 0.096 | 6.862E-02 | 0.843 | pan | Severe COVID-19 |
| 17821_20  | NMT2                        | Glycylpeptide N-tetradecanoyltransferase 2                                                 | O60551 | NMT2       | NA | Wald ratio                | 1  | 0.435  | 0.239 | 6.873E-02 | 0.843 | pan | Severe COVID-19 |
| 2992_59   | IL-17 sR                    | Interleukin-17 receptor A                                                                  | Q96F46 | IL17RA     | NA | Inverse variance weighted | 7  | -0.033 | 0.018 | 6.923E-02 | 0.843 | pan | Severe COVID-19 |
| 7808_5    | GLCE                        | D-glucuronyl C5-epimerase                                                                  | O94923 | GLCE       | NA | Inverse variance weighted | 9  | -0.066 | 0.036 | 6.982E-02 | 0.843 | pan | Severe COVID-19 |
| 17447_52  | SFRP4                       | Secreted frizzled-related protein 4                                                        | Q6FHJ7 | SFRP4      | NA | Inverse variance weighted | 4  | -0.153 | 0.085 | 7.010E-02 | 0.843 | pan | Severe COVID-19 |
| 6923_1    | PLOD2                       | Procollagen-lysine,2-oxoglutarate 5-dioxygenase 2                                          | O00469 | PLOD2      | NA | Inverse variance weighted | 3  | -0.206 | 0.114 | 7.020E-02 | 0.843 | pan | Severe COVID-19 |
| 5825_49   | IFN-g R1                    | Interferon gamma receptor 1                                                                | P15260 | IFNGR1     | NA | Inverse variance weighted | 3  | -0.408 | 0.226 | 7.021E-02 | 0.843 | pan | Severe COVID-19 |
| 9321_400  | NMB                         | Neuremodin-B                                                                               | P08949 | NMB        | NA | Inverse variance weighted | 2  | -0.171 | 0.095 | 7.044E-02 | 0.843 | pan | Severe COVID-19 |
| 8606_39   | GNPMB:CD                    | Transmembrane glycoprotein NMB:Cytoplasmic domain                                          | Q14956 | GNPMB      | NA | Inverse variance weighted | 9  | -0.104 | 0.058 | 7.077E-02 | 0.843 | pan | Severe COVID-19 |
| 11126_102 | TRIO                        | Triple functional domain protein                                                           | O75962 | TRIO       | NA | Wald ratio                | 1  | -0.601 | 0.333 | 7.121E-02 | 0.843 | pan | Severe COVID-19 |
| 18840_205 | SH21B                       | SH2 domain-containing protein 1B                                                           | O14796 | SH2D1B     | NA | Wald ratio                | 1  | 0.651  | 0.361 | 7.124E-02 | 0.843 | pan | Severe COVID-19 |
| 18917_53  | Pancreatic alpha-amylose    | Pancreatic alpha-amylose                                                                   | P04746 | AMY2A      | NA | Inverse variance weighted | 7  | -0.302 | 0.168 | 7.137E-02 | 0.843 | pan | Severe COVID-19 |
| 15583_18  | FCRLB                       | Fc receptor-like B                                                                         | Q6BAA4 | FCRLB      | NA | Inverse variance weighted | 4  | 0.212  | 0.118 | 7.225E-02 | 0.843 | pan | Severe COVID-19 |
| 2635_61   | Laylin                      | Laylin                                                                                     | Q6UX15 | LAYN       | NA | Wald ratio                | 1  | -0.485 | 0.270 | 7.240E-02 | 0.843 | pan | Severe COVID-19 |
| 5457_5    | COLEC12                     | Collectin-12                                                                               | Q5KU26 | COLEC12    | NA | Inverse variance weighted | 12 | 0.179  | 0.100 | 7.246E-02 | 0.843 | pan | Severe COVID-19 |
| 10924_258 | NEUFC                       | Neuferricin                                                                                | Q8WUJ1 | CYB5D2     | NA | Inverse variance weighted | 3  | 0.186  | 0.103 | 7.253E-02 | 0.843 | pan | Severe COVID-19 |
| 5713_9    | IFN-lambda 3                | Interferon lambda-3                                                                        | Q8I219 | IFNL3      | NA | Inverse variance weighted | 2  | 0.444  | 0.247 | 7.270E-02 | 0.843 | pan | Severe COVID-19 |
| 16856_79  | MARE2                       | Microtubule-associated protein RP/EB family member 2                                       | Q15555 | MAPRE2     | NA | Inverse variance weighted | 2  | 0.386  | 0.215 | 7.287E-02 | 0.843 | pan | Severe COVID-19 |
| 8383_20   | CK094                       | Uncharacterized protein C11orf94                                                           | C9JXK5 | C11orf94   | NA | Wald ratio                | 1  | 0.249  | 0.139 | 7.302E-02 | 0.843 | pan | Severe COVID-19 |
| 15385_116 | FABP2                       | Fatty acid-binding protein, intestinal                                                     | P12104 | FABP2      | NA | Inverse variance weighted | 10 | 0.082  | 0.046 | 7.420E-02 | 0.843 | pan | Severe COVID-19 |
| 4407_10   | MSP                         | Hepatocyte growth factor-like protein                                                      | P26927 | MTS1       | NA | Inverse variance weighted | 20 | -0.067 | 0.037 | 7.478E-02 | 0.843 | pan | Severe COVID-19 |
| 18830_1   | Omentin                     | Intelectin-1                                                                               | Q8WWA0 | ITLN1      | NA | Inverse variance weighted | 4  | 0.250  | 0.141 | 7.492E-02 | 0.843 | pan | Severe COVID-19 |
| 13666_222 | Carbonic Anhydrase X        | Carbonic anhydrase-related protein 10                                                      | Q9NS85 | CA10       | NA | Inverse variance weighted | 8  | -0.150 | 0.085 | 7.509E-02 | 0.843 | pan | Severe COVID-19 |
| 16305_10  | Cadherin-11:ECD             | Cadherin-11:Extracellular domain                                                           | P55287 | CDH11      | NA | Inverse variance weighted | 11 | -0.113 | 0.063 | 7.532E-02 | 0.843 | pan | Severe COVID-19 |
| 15398_2   | HERV1                       | FAD-linked sulfhydryl oxidase ALR                                                          | P55789 | GFER       | NA | Wald ratio                | 1  | -0.473 | 0.267 | 7.602E-02 | 0.843 | pan | Severe COVID-19 |
| 11378_37  | KSYK:SH2, 1 and 2           | Tyrosine-protein kinase SYK:Src Homology domain                                            | P43405 | SYK        | NA | Wald ratio                | 1  | 0.564  | 0.318 | 7.603E-02 | 0.843 | pan | Severe COVID-19 |
| 15545_13  | Calcineurin B a             | Calcineurin subunit B type 1                                                               | P63098 | PPP3R1     | NA | Wald ratio                | 1  | -0.441 | 0.249 | 7.676E-02 | 0.843 | pan | Severe COVID-19 |
| 7059_14   | LIRA6                       | Leukocyte immunoglobulin-like receptor subfamily A member 6                                | Q6PI73 | LILRA6     | NA | Inverse variance weighted | 6  | 0.114  | 0.065 | 7.740E-02 | 0.843 | pan | Severe COVID-19 |
| 9409_11   | TRYB1                       | Tryptase beta-1                                                                            | Q15661 | TPSAB1     | NA | Inverse variance weighted | 18 | 0.055  | 0.031 | 7.759E-02 | 0.843 | pan | Severe COVID-19 |
| 6372_7    | YBOX2                       | Y-box-binding protein 2                                                                    | Q9Y217 | YBX2       | NA | Inverse variance weighted | 2  | 0.420  | 0.238 | 7.795E-02 | 0.843 | pan | Severe COVID-19 |
| 17364_8   | RU2B                        | U2 small nuclear ribonucleoprotein B"                                                      | P08579 | SNRPB2     | NA | Wald ratio                | 1  | -0.870 | 0.495 | 7.914E-02 | 0.843 | pan | Severe COVID-19 |
| 13575_40  | DVL2                        | Segment polarity protein dishevelled homolog DVL-2                                         | O14641 | DVL2       | NA | Wald ratio                | 1  | 0.833  | 0.475 | 7.926E-02 | 0.843 | pan | Severe COVID-19 |
| 17512_2   | NMI                         | N-myc-interactor                                                                           | Q13287 | NMI        | NA | Wald ratio                | 1  | 0.690  | 0.393 | 7.933E-02 | 0.843 | pan | Severe COVID-19 |
| 6986_17   | HS3S8                       | Heparan sulfate glucosamine 3-O-sulfotransferase 3B1                                       | Q9Y662 | HS3ST3B1   | NA | Wald ratio                | 1  | -0.616 | 0.351 | 7.938E-02 | 0.843 | pan | Severe COVID-19 |
| 6527_1    | TRIL:ECD                    | TLR4 interactor with leucine rich repeats:Extracellular domain                             | Q7L0X0 | TRIL       | NA | Wald ratio                | 1  | 0.344  | 0.196 | 7.943E-02 | 0.843 | pan | Severe COVID-19 |
| 3905_62   | UBE2N                       | Ubiquitin-conjugating enzyme E2 N                                                          | P61088 | UBE2N      | NA | Wald ratio                | 1  | -0.579 | 0.330 | 7.954E-02 | 0.843 | pan | Severe COVID-19 |
| 18376_19  | Myosin light chain 1        | Myosin light chain 3                                                                       | P08590 | MYL3       | NA | Inverse variance weighted | 6  | -0.263 | 0.150 | 7.993E-02 | 0.843 | pan | Severe COVID-19 |
| 12431_13  | PELO                        | Protein pelota homolog                                                                     | Q9BRX2 | PELO       | NA | Wald ratio                | 1  | -0.568 | 0.325 | 8.034E-02 | 0.843 | pan | Severe COVID-19 |
| 6321_65   | PCDGA                       | Protocadherin gamma-A10                                                                    | Q9Y5H3 | PCDHGA10   | NA | Inverse variance weighted | 3  | 0.310  | 0.178 | 8.095E-02 | 0.843 | pan | Severe COVID-19 |
| 8035_6    | CA198                       | Uncharacterized protein C1orf198                                                           | Q9HA25 | C1orf198   | NA | Wald ratio                | 1  | 0.228  | 0.131 | 8.130E-02 | 0.843 | pan | Severe COVID-19 |
| 13682_47  | M-CSF R                     | Macrophage colony-stimulating factor 1 receptor                                            | P07333 | CSF1R      | NA | Inverse variance weighted | 5  | -0.240 | 0.138 | 8.139E-02 | 0.843 | pan | Severe COVID-19 |
| 13590_1   | ORN                         | Oligoribonuclease, mitochondrial                                                           | Q9Y388 | REXO2      | NA | Inverse variance weighted | 2  | -0.284 | 0.163 | 8.148E-02 | 0.843 | pan | Severe COVID-19 |
| 3448_13   | IR                          | Insulin receptor                                                                           | P06213 | INSR       | NA | Inverse variance weighted | 13 | -0.143 | 0.082 | 8.169E-02 | 0.843 | pan | Severe COVID-19 |
| 16828_8   | Collagen a1(VI)             | Collagen alpha-1(VI) chain                                                                 | P12109 | COL6A1     | NA | Inverse variance weighted | 14 | -0.043 | 0.025 | 8.175E-02 | 0.843 | pan | Severe COVID-19 |
| 11926_23  | P34                         | Alpha- and gamma-adaptin-binding protein p34                                               | Q6PD74 | AAGAB      | NA | Inverse variance weighted | 3  | 0.309  | 0.177 | 8.181E-02 | 0.843 | pan | Severe COVID-19 |
| 14112_40  | RELt                        | Tumor necrosis factor receptor superfamily member 19L                                      | Q96924 | RELt       | NA | Wald ratio                | 1  | 0.524  | 0.301 | 8.198E-02 | 0.843 | pan | Severe COVID-19 |
| 5008_51   | Mn SOD                      | Superoxide dismutase [Mn], mitochondrial                                                   | P04179 | SOD2       | NA | Inverse variance weighted | 4  | 0.325  | 0.187 | 8.223E-02 | 0.843 | pan | Severe COVID-19 |
| 13268_45  | WNT5A                       | Protein Wnt-5a                                                                             | P41221 | WNT5A      | NA | Inverse variance weighted | 5  | 0.236  | 0.136 | 8.251E-02 | 0.843 | pan | Severe COVID-19 |
| 11387_3   | ATF6B                       | Cyclic AMP-dependent transcription factor ATF-6 beta                                       | Q99941 | ATF6B      | NA | Inverse variance weighted | 4  | -0.239 | 0.138 | 8.283E-02 | 0.843 | pan | Severe COVID-19 |
| 6606_61   | KISS1                       | Metastasis-suppressor KISS-1                                                               | Q15726 | KISS1      | NA | Inverse variance weighted | 14 | 0.072  | 0.041 | 8.330E-02 | 0.844 | pan | Severe COVID-19 |
| 11293_14  | LRRN1:CD                    | Leucine-rich repeat neuronal protein 1:Cytoplasmic domain                                  | Q6UXK5 | LRRN1      | NA | Inverse variance weighted | 7  | -0.196 | 0.113 | 8.443E-02 | 0.849 | pan | Severe COVID-19 |
| 19188_21  | NAP2L                       | nucleosome assembly protein 1-like 4                                                       | Q99733 | NAP1L4     | NA | Inverse variance weighted | 3  | 0.343  | 0.199 | 8.453E-02 | 0.849 | pan | Severe COVID-19 |
| 8993_151  | RIPK2                       | Receptor-interacting serine/threonine-protein kinase 2                                     | O43353 | RIPK2      | NA | Wald ratio                | 1  | -0.528 | 0.307 | 8.532E-02 | 0.853 | pan | Severe COVID-19 |
| 15381_45  | Discoidin domain receptor 2 | Discoidin domain-containing receptor 2                                                     | Q16832 | DDR2       | NA | Wald ratio                | 1  | 0.513  | 0.299 | 8.598E-02 | 0.855 | pan | Severe COVID-19 |
| 9765_4    | NDE1                        | Nuclear distribution protein nudE homolog 1                                                | Q9NXR1 | NDE1       | NA | Wald ratio                | 1  | 0.365  | 0.214 | 8.769E-02 | 0.856 | pan | Severe COVID-19 |
| 10396_6   | Mcl-1                       | Induced myeloid leukemia cell differentiation protein Mcl-1                                | Q07820 | MCL1       | NA | Inverse variance weighted | 2  | -0.369 | 0.216 | 8.791E-02 | 0.856 | pan | Severe COVID-19 |
| 6342_10   | Nephronectin                | Nephronectin                                                                               | Q6UX19 | NPNT       | NA | Inverse variance weighted | 4  | 0.348  | 0.205 | 8.903E-02 | 0.856 | pan | Severe COVID-19 |
| 4920_10   | Lysozyme                    | Lysozyme C                                                                                 | P61626 | LYZ        | NA | Inverse variance weighted | 10 | -0.061 | 0.036 | 8.933E-02 | 0.856 | pan | Severe COVID-19 |
| 19173_5   | ZFAN1                       | AN1-type zinc finger protein 1                                                             | Q8TCF1 | ZFAND1     | NA | Inverse variance weighted | 4  | 0.145  | 0.086 | 8.939E-02 | 0.856 | pan | Severe COVID-19 |
| 6207_10   | prosaposin                  | Prosaposin                                                                                 | P07602 | PSAP       | NA | Inverse variance weighted | 5  | 0.290  | 0.171 | 8.946E-02 | 0.856 | pan | Severe COVID-19 |
| 10772_21  | CGAT2                       | Chondroitin sulfate N-acetylgalactosaminyltransferase 2                                    | Q8N6G5 | CSGALNACT2 | NA | Wald ratio                | 1  | 0.267  | 0.157 | 8.973E-02 | 0.856 | pan | Severe COVID-19 |
| 9884_8    | PP1L1                       | Peptidyl-prolyl cis-trans isomerase-like 1                                                 | Q9Y3C6 | PP1L1      | NA | Inverse variance weighted | 9  | 0.068  | 0.040 | 9.006E-02 | 0.856 | pan | Severe COVID-19 |
| 8252_2    | NOTUM                       | Palmitoleoyl-protein carboxylesterase NOTUM                                                | Q6P988 | NOTUM      | NA | Inverse variance weighted | 4  | 0.231  | 0.136 | 9.026E-02 | 0.856 | pan | Severe COVID-19 |
| 10085_25  | STAR                        | Steroidogenic acute regulatory protein, mitochondrial                                      | P49675 | STAR       | NA | Wald ratio                | 1  | -0.574 | 0.339 | 9.099E-02 | 0.856 | pan | Severe COVID-19 |
| 12546_1   | SMTN                        | Smootherin                                                                                 | P53814 | SMTN       | NA | Wald ratio                | 1  | -0.646 | 0.382 | 9.120E-02 | 0.856 | pan | Severe COVID-19 |
| 6467_65   | KTEL1                       | Protein O-glucosyltransferase 1                                                            | Q8NBL1 | POGLUT1    | NA | Inverse variance weighted | 2  | -0.115 | 0.068 | 9.136E-02 | 0.856 | pan | Severe COVID-19 |
| 5480_49   | RANTES                      | C-C motif chemokine 5                                                                      | P13501 | CCL5       | NA | Inverse variance weighted | 2  | 0.367  | 0.217 | 9.155E-02 | 0.856 | pan | Severe COVID-19 |
| 11531_24  | GI24:CD                     | V-type immunoglobulin domain-containing suppressor of T-cell activation:Cytoplasmic domain | Q9H7M9 | VSIR       | NA | Wald ratio                | 1  | 0.411  | 0.244 | 9.169E-02 | 0.856 | pan | Severe COVID-19 |
| 9886_28   | XRCC4                       | DNA repair protein XRCC4                                                                   | Q13426 | XRCC4      | NA | Inverse variance weighted | 2  | 0.200  | 0.119 | 9.205E-02 | 0.856 | pan | Severe COVID-19 |
| 15308_108 | VWC2                        | Borin                                                                                      | Q2TAL6 | VWC2       | NA | Inverse variance weighted | 9  | 0.073  | 0.043 | 9.303E-02 | 0.861 | pan | Severe COVID-19 |
| 7185_29   | GPV                         | Platelet glycoprotein V                                                                    | P40197 | GP5        | NA | Inverse variance weighted | 2  | -0.290 | 0.173 | 9.343E-02 | 0.861 | pan | Severe COVID-19 |
| 12016_60  | CBL                         | E3 ubiquitin-protein ligase CBL                                                            | P22681 | CBL        | NA | Wald ratio                | 1  | 0.175  | 0.105 | 9.564E-02 | 0.871 | pan | Severe COVID-19 |
| 17692_2   | BT3A3                       | Butyrophilin subfamily 3 member A3                                                         | O00478 | BTN3A3     | NA | Inverse variance weighted | 10 | -0.057 | 0.034 | 9.626E-02 | 0.871 | pan | Severe COVID-19 |
| 13563_259 | ACBD7                       | Acyl-CoA-binding domain-containing protein 7                                               | Q8N6N7 | ACBD7      | NA | Wald ratio                | 1  | 0.648  | 0.392 | 9.772E-02 | 0.871 | pan | Severe COVID-19 |
| 9594_30   | ZNT5                        | Zinc transporter 5                                                                         | Q8TAD4 | SLC30A5    | NA | Wald ratio                | 1  | -0.341 | 0.206 | 9.777E-02 | 0.871 | pan | Severe COVID-19 |

|           |                              |                                                                  |        |           |    |                           |    |        |       |           |       |     |                 |
|-----------|------------------------------|------------------------------------------------------------------|--------|-----------|----|---------------------------|----|--------|-------|-----------|-------|-----|-----------------|
| 17735_130 | GBRAP                        | Gamma-aminobutyric acid receptor-associated protein              | O95166 | GABARAP   | NA | Wald ratio                | 1  | 0.503  | 0.304 | 9.799E-02 | 0.871 | pan | Severe COVID-19 |
| 6629_3    | HBD-1                        | Beta-defensin 1                                                  | P60022 | DEFB1     | NA | Inverse variance weighted | 10 | -0.075 | 0.045 | 9.820E-02 | 0.871 | pan | Severe COVID-19 |
| 4254_6    | NUDC3                        | NudC domain-containing protein 3                                 | Q8IVD9 | NUDCD3    | NA | Wald ratio                | 1  | 0.372  | 0.225 | 9.833E-02 | 0.871 | pan | Severe COVID-19 |
| 9901_28   | EGLN1                        | Egl nine homolog 1                                               | Q9GZT9 | EGLN1     | NA | Inverse variance weighted | 7  | -0.142 | 0.086 | 9.842E-02 | 0.871 | pan | Severe COVID-19 |
| 16302_11  | SPLC2                        | BPI fold-containing family A member 2                            | Q96DR5 | BP1FA2    | NA | Wald ratio                | 1  | -0.378 | 0.229 | 9.868E-02 | 0.871 | pan | Severe COVID-19 |
| 15462_28  | CD8A                         | T-cell surface glycoprotein CD8 alpha chain                      | P01732 | CD8A      | NA | Inverse variance weighted | 8  | -0.086 | 0.052 | 9.888E-02 | 0.871 | pan | Severe COVID-19 |
| 11248_43  | HEM4                         | Uroporphyrinogen-III synthase                                    | P10746 | URO5      | NA | Inverse variance weighted | 4  | 0.118  | 0.072 | 9.908E-02 | 0.871 | pan | Severe COVID-19 |
| 13954_9   | GN1A                         | Glucosamine 6-phosphate N-acetyltransferase                      | Q96KE6 | GNPNA1    | NA | Wald ratio                | 1  | -0.428 | 0.260 | 9.973E-02 | 0.871 | pan | Severe COVID-19 |
| 13988_67  | NMR11                        | NmrA-like family domain-containing protein 1                     | Q9H8L8 | NMR11     | NA | Inverse variance weighted | 13 | -0.068 | 0.042 | 1.000E-01 | 0.871 | pan | Severe COVID-19 |
| 9751_72   | NSEP1                        | Nuclease-sensitive element-binding protein 1                     | P67809 | YBK1      | NA | Inverse variance weighted | 5  | -0.229 | 0.140 | 1.008E-01 | 0.871 | pan | Severe COVID-19 |
| 13955_33  | DAPK1                        | Death-associated protein kinase 1                                | P53355 | DAPK1     | NA | Inverse variance weighted | 3  | 0.327  | 0.200 | 1.008E-01 | 0.871 | pan | Severe COVID-19 |
| 6551_94   | Vaspin                       | Serpin A12                                                       | Q8IW75 | SERPINA12 | NA | Inverse variance weighted | 6  | -0.074 | 0.045 | 1.009E-01 | 0.871 | pan | Severe COVID-19 |
| 9312_8    | AZGP1                        | Zinc-alpha-2-glycoprotein                                        | P25311 | AZGP1     | NA | Inverse variance weighted | 4  | -0.317 | 0.194 | 1.017E-01 | 0.874 | pan | Severe COVID-19 |
| 5947_90   | Tpo                          | Thrombopoietin                                                   | P40225 | THPO      | NA | Inverse variance weighted | 2  | 0.472  | 0.289 | 1.025E-01 | 0.875 | pan | Severe COVID-19 |
| 7139_14   | SLIK4                        | SLIT and NTRK-like protein 4                                     | Q8IW52 | SLITRK4   | NA | Wald ratio                | 1  | 0.446  | 0.273 | 1.026E-01 | 0.875 | pan | Severe COVID-19 |
| 10557_6   | TEX29                        | Testis-expressed sequence 29 protein                             | Q8N6K0 | TEX29     | NA | Inverse variance weighted | 4  | 0.234  | 0.144 | 1.047E-01 | 0.879 | pan | Severe COVID-19 |
| 9343_16   | IL-2 sRb                     | Interleukin-2 receptor subunit beta                              | P14784 | IL2RB     | NA | Inverse variance weighted | 5  | -0.323 | 0.199 | 1.047E-01 | 0.879 | pan | Severe COVID-19 |
| 12616_45  | NRBP                         | Nuclear receptor-binding protein                                 | Q9UHY1 | NRBP1     | NA | Wald ratio                | 1  | 0.195  | 0.121 | 1.048E-01 | 0.879 | pan | Severe COVID-19 |
| 7193_98   | PCDC1                        | Protocadherin alpha-C1                                           | Q9H158 | PCDHAC1   | NA | Wald ratio                | 1  | -0.356 | 0.221 | 1.076E-01 | 0.879 | pan | Severe COVID-19 |
| 2900_53   | HCC-1                        | C-C motif chemokine 14                                           | Q16627 | CCL14     | NA | Inverse variance weighted | 7  | -0.114 | 0.071 | 1.077E-01 | 0.879 | pan | Severe COVID-19 |
| 12940_35  | AL3B1                        | Aldehyde dehydrogenase family 3 member B1                        | P43353 | ALDH3B1   | NA | Wald ratio                | 1  | 0.214  | 0.133 | 1.079E-01 | 0.879 | pan | Severe COVID-19 |
| 13986_6   | LANC1                        | LancC-like protein 1                                             | O43813 | LANCL1    | NA | Inverse variance weighted | 2  | -0.300 | 0.187 | 1.085E-01 | 0.879 | pan | Severe COVID-19 |
| 6919_3    | HBAZ                         | Hemoglobin subunit zeta                                          | P02008 | HBZ       | NA | Inverse variance weighted | 8  | 0.064  | 0.040 | 1.088E-01 | 0.879 | pan | Severe COVID-19 |
| 16892_23  | ENPP2                        | Ectonucleotide pyrophosphatase/phosphodiesterase family member 2 | Q13822 | ENPP2     | NA | Inverse variance weighted | 6  | 0.204  | 0.127 | 1.093E-01 | 0.879 | pan | Severe COVID-19 |
| 3000_66   | MBL                          | Mannose-binding protein C                                        | P11226 | MBL2      | NA | Inverse variance weighted | 20 | -0.044 | 0.028 | 1.094E-01 | 0.879 | pan | Severe COVID-19 |
| 2706_69   | Thyroxine-Binding Globulin   | Thyroxine-binding globulin                                       | P05543 | SERPINA7  | NA | Inverse variance weighted | 2  | 0.350  | 0.219 | 1.097E-01 | 0.879 | pan | Severe COVID-19 |
| 11542_11  | TM230                        | Transmembrane protein 230                                        | Q96A57 | TMEM230   | NA | Wald ratio                | 1  | -0.358 | 0.224 | 1.098E-01 | 0.879 | pan | Severe COVID-19 |
| 8476_11   | CgA                          | Chromogranin-A                                                   | P10645 | CHGA      | NA | Inverse variance weighted | 6  | 0.169  | 0.106 | 1.109E-01 | 0.879 | pan | Severe COVID-19 |
| 9484_75   | Desmoglein-2                 | Desmoglein-2                                                     | Q14126 | DSG2      | NA | Inverse variance weighted | 10 | 0.125  | 0.078 | 1.109E-01 | 0.879 | pan | Severe COVID-19 |
| 15304_1   | PAP1                         | Regenerating islet-derived protein 3-alpha                       | Q06141 | REG3A     | NA | Inverse variance weighted | 15 | 0.095  | 0.060 | 1.115E-01 | 0.879 | pan | Severe COVID-19 |
| 19293_6   | VP26A                        | Vacuolar protein sorting-associated protein 26A                  | O75436 | VPS26A    | NA | Inverse variance weighted | 3  | -0.132 | 0.083 | 1.126E-01 | 0.879 | pan | Severe COVID-19 |
| 5132_71   | TCCR                         | Interleukin-27 receptor subunit alpha                            | Q6UWB1 | IL27RA    | NA | Inverse variance weighted | 7  | -0.059 | 0.037 | 1.130E-01 | 0.879 | pan | Severe COVID-19 |
| 2871_73   | RAD51                        | DNA repair protein RAD51 homolog 1                               | Q06609 | RAD51     | NA | Wald ratio                | 1  | -0.504 | 0.318 | 1.132E-01 | 0.879 | pan | Severe COVID-19 |
| 7206_20   | F16P1                        | Fructose-1,6-bisphosphatase 1                                    | P09467 | FBP1      | NA | Inverse variance weighted | 2  | 0.247  | 0.156 | 1.136E-01 | 0.879 | pan | Severe COVID-19 |
| 15540_6   | Vimentin                     | Vimentin                                                         | P08670 | VIM       | NA | Inverse variance weighted | 2  | 0.288  | 0.183 | 1.145E-01 | 0.879 | pan | Severe COVID-19 |
| 17697_2   | OVCA2                        | Esterase OVCA2                                                   | Q8WZ82 | OVCA2     | NA | Wald ratio                | 1  | -0.334 | 0.212 | 1.149E-01 | 0.879 | pan | Severe COVID-19 |
| 6555_58   | Stomatin-like protein 2      | Stomatin-like protein 2, mitochondrial                           | Q9UIZ1 | STOML2    | NA | Wald ratio                | 1  | 0.463  | 0.294 | 1.151E-01 | 0.879 | pan | Severe COVID-19 |
| 3413_50   | BFL1                         | Bcl-2-related protein A1                                         | Q16548 | BCL2A1    | NA | Wald ratio                | 1  | -0.531 | 0.337 | 1.153E-01 | 0.879 | pan | Severe COVID-19 |
| 17377_1   | Aldose reductase-like C3     | Aldo-keto reductase family 1 member C3                           | P42330 | AKR1C3    | NA | Inverse variance weighted | 9  | -0.101 | 0.064 | 1.157E-01 | 0.879 | pan | Severe COVID-19 |
| 3607_71   | DKK3                         | Dickkopf-related protein 3                                       | Q9UBP4 | DKK3      | NA | Inverse variance weighted | 10 | -0.065 | 0.041 | 1.159E-01 | 0.879 | pan | Severe COVID-19 |
| 4911_49   | Glutathione S-transferase Pi | Glutathione S-transferase P                                      | P09211 | GSTP1     | NA | Wald ratio                | 1  | -0.172 | 0.109 | 1.161E-01 | 0.879 | pan | Severe COVID-19 |
| 2836_68   | Lipocalin 2                  | Neutrophil gelatinase-associated lipocalin                       | P80188 | LCN2      | NA | Inverse variance weighted | 7  | -0.166 | 0.106 | 1.165E-01 | 0.879 | pan | Severe COVID-19 |
| 15347_12  | Hemopexin                    | Hemopexin                                                        | P02790 | HPX       | NA | Wald ratio                | 1  | -0.532 | 0.339 | 1.169E-01 | 0.879 | pan | Severe COVID-19 |
| 18337_4   | GMDS                         | GDP-mannose 4,6 dehydratase                                      | O60547 | GMDS      | NA | Wald ratio                | 1  | -0.454 | 0.290 | 1.170E-01 | 0.879 | pan | Severe COVID-19 |
| 3077_66   | Coagulation Factor Xa        | Coagulation factor Xa                                            | P00742 | F10       | NA | Inverse variance weighted | 4  | -0.242 | 0.155 | 1.171E-01 | 0.879 | pan | Severe COVID-19 |
| 16616_137 | ENO8                         | Beta-enolase                                                     | P13929 | ENO3      | NA | Inverse variance weighted | 5  | 0.189  | 0.121 | 1.177E-01 | 0.879 | pan | Severe COVID-19 |
| 6617_12   | FCRL6                        | Fc receptor-like protein 6                                       | Q6DN72 | FCRL6     | NA | Wald ratio                | 1  | -0.193 | 0.124 | 1.194E-01 | 0.879 | pan | Severe COVID-19 |
| 14101_2   | CNTRF alpha                  | Ciliary neurotrophic factor receptor subunit alpha               | P26992 | CNTRF     | NA | Inverse variance weighted | 5  | -0.155 | 0.100 | 1.201E-01 | 0.879 | pan | Severe COVID-19 |
| 11205_10  | Integrin beta-7              | Integrin beta-7                                                  | P26010 | ITGB7     | NA | Wald ratio                | 1  | 0.503  | 0.324 | 1.201E-01 | 0.879 | pan | Severe COVID-19 |
| 9557_5    | MANS1                        | MANSC domain-containing protein 1                                | Q9H8J5 | MANS1     | NA | Inverse variance weighted | 5  | 0.088  | 0.057 | 1.203E-01 | 0.879 | pan | Severe COVID-19 |
| 9747_48   | MARK3                        | MAP/microtubule affinity-regulating kinase 3                     | P27448 | MARK3     | NA | Wald ratio                | 1  | 0.741  | 0.477 | 1.203E-01 | 0.879 | pan | Severe COVID-19 |
| 4831_4    | sL-Selectin                  | L-Selectin                                                       | P14151 | SELL      | NA | Inverse variance weighted | 8  | -0.090 | 0.058 | 1.211E-01 | 0.879 | pan | Severe COVID-19 |
| 17384_110 | KGPF                         | ATP-dependent 6-phosphofructokinase, muscle type                 | P08237 | PFKM      | NA | Inverse variance weighted | 3  | -0.197 | 0.127 | 1.214E-01 | 0.879 | pan | Severe COVID-19 |
| 8766_29   | LIRAS                        | Leukocyte immunoglobulin-like receptor subfamily A member 5      | A6N173 | LILRA5    | NA | Inverse variance weighted | 3  | -0.385 | 0.249 | 1.217E-01 | 0.879 | pan | Severe COVID-19 |
| 18401_18  | ALKB3                        | Alpha-ketoglutarate-dependent dioxygenase alkB homolog 3         | Q96Q83 | ALKBH3    | NA | Inverse variance weighted | 6  | -0.094 | 0.061 | 1.229E-01 | 0.879 | pan | Severe COVID-19 |
| 8357_43   | ST4A1                        | Sulfotransferase 4A1                                             | Q9BR01 | SULT4A1   | NA | Wald ratio                | 1  | 0.425  | 0.276 | 1.231E-01 | 0.879 | pan | Severe COVID-19 |
| 7128_9    | VWA2                         | von Willebrand factor A domain-containing protein 2              | Q5GFL6 | VWA2      | NA | Inverse variance weighted | 7  | 0.133  | 0.086 | 1.235E-01 | 0.879 | pan | Severe COVID-19 |
| 15435_4   | PNP                          | Purine nucleoside phosphorylase                                  | P00491 | PNP       | NA | Inverse variance weighted | 2  | -0.149 | 0.097 | 1.238E-01 | 0.879 | pan | Severe COVID-19 |
| 16035_8   | VEGF sR3                     | Vascular endothelial growth factor receptor 3                    | P35916 | FLT4      | NA | Inverse variance weighted | 11 | -0.118 | 0.077 | 1.240E-01 | 0.879 | pan | Severe COVID-19 |
| 2585_2    | PRL                          | Prolactin                                                        | P01236 | PRL       | NA | Wald ratio                | 1  | 0.341  | 0.222 | 1.242E-01 | 0.879 | pan | Severe COVID-19 |
| 8759_29   | a1,4-Galactosyltransferase   | Lactosylceramide 4-alpha-galactosyltransferase                   | Q9NPF4 | A4GALT    | NA | Inverse variance weighted | 16 | 0.054  | 0.035 | 1.243E-01 | 0.879 | pan | Severe COVID-19 |
| 15607_56  | KPYR                         | Pyruvate kinase PKLR                                             | P30613 | PKLR      | NA | Inverse variance weighted | 3  | -0.282 | 0.184 | 1.243E-01 | 0.879 | pan | Severe COVID-19 |
| 9823_2    | DYR                          | Dihydrofolate reductase                                          | P00374 | DHFR      | NA | Inverse variance weighted | 5  | -0.091 | 0.059 | 1.244E-01 | 0.879 | pan | Severe COVID-19 |
| 5337_64   | B7-2                         | T-lymphocyte activation antigen CD86                             | P42081 | CD86      | NA | Wald ratio                | 1  | -0.397 | 0.258 | 1.245E-01 | 0.879 | pan | Severe COVID-19 |
| 6713_4    | LRP11                        | Low-density lipoprotein receptor-related protein 11              | Q86VZ4 | LRP11     | NA | Inverse variance weighted | 12 | 0.088  | 0.057 | 1.256E-01 | 0.879 | pan | Severe COVID-19 |
| 11360_39  | RRM1                         | Ribonucleoside-diphosphate reductase large subunit               | P23921 | RRM1      | NA | Inverse variance weighted | 16 | -0.095 | 0.062 | 1.257E-01 | 0.879 | pan | Severe COVID-19 |
| 5610_32   | CJ038                        | Protein FAM171A1                                                 | Q5VUR5 | FAM171A1  | NA | Inverse variance weighted | 3  | -0.268 | 0.175 | 1.265E-01 | 0.879 | pan | Severe COVID-19 |
| 13090_17  | S100A6                       | Protein S100-A6                                                  | P06703 | S100A6    | NA | Inverse variance weighted | 3  | 0.293  | 0.192 | 1.267E-01 | 0.879 | pan | Severe COVID-19 |
| 3038_9    | I-TAC                        | C-X-C motif chemokine 11                                         | O14625 | CXCL11    | NA | Inverse variance weighted | 8  | -0.119 | 0.078 | 1.273E-01 | 0.879 | pan | Severe COVID-19 |
| 18308_30  | STXB6                        | Syntaxin-binding protein 6                                       | Q8NFX7 | STXBP6    | NA | Wald ratio                | 1  | -0.457 | 0.300 | 1.274E-01 | 0.879 | pan | Severe COVID-19 |
| 17776_15  | PECR                         | Peroxisomal trans-2-enoyl-CoA reductase                          | Q9BY49 | PECR      | NA | Wald ratio                | 1  | 0.240  | 0.158 | 1.279E-01 | 0.879 | pan | Severe COVID-19 |
| 5069_9    | DAF                          | Complement decay-accelerating factor                             | P08174 | CD55      | NA | Inverse variance weighted | 5  | -0.117 | 0.077 | 1.279E-01 | 0.879 | pan | Severe COVID-19 |
| 5475_10   | PKC-B-II                     | Protein kinase C beta type (splice variant beta-II)              | P05771 | PRKCB     | NA | Wald ratio                | 1  | -0.301 | 0.198 | 1.280E-01 | 0.879 | pan | Severe COVID-19 |
| 8403_18   | Fatty acid synthase          | Fatty acid synthase                                              | P49327 | FASN      | NA | Wald ratio                | 1  | 0.161  | 0.106 | 1.283E-01 | 0.879 | pan | Severe COVID-19 |
| 7806_33   | B4GT7                        | Beta-1,4-galactosyltransferase 7                                 | Q9UBV7 | B4GALT7   | NA | Inverse variance weighted | 8  | 0.075  | 0.049 | 1.294E-01 | 0.879 | pan | Severe COVID-19 |
| 12522_6   | RD23B                        | UV excision repair protein RAD23 homolog B                       | P54727 | RAD23B    | NA | Wald ratio                | 1  | 0.405  | 0.267 | 1.296E-01 | 0.879 | pan | Severe COVID-19 |
| 15548_35  | SERA                         | D-3-phosphoglycerate dehydrogenase                               | O43175 | PHGDH     | NA | Inverse variance weighted | 2  | 0.314  | 0.207 | 1.299E-01 | 0.879 | pan | Severe COVID-19 |
| 12008_3   | CD7                          | T-cell antigen CD7                                               | P09564 | CD7       | NA | Inverse variance weighted | 4  | 0.250  | 0.165 | 1.299E-01 | 0.879 | pan | Severe COVID-19 |

|           |                              |                                                                                               |        |          |    |                           |    |        |       |           |       |     |                 |
|-----------|------------------------------|-----------------------------------------------------------------------------------------------|--------|----------|----|---------------------------|----|--------|-------|-----------|-------|-----|-----------------|
| 8954_30   | M4K1                         | Mitogen-activated protein kinase kinase kinase kinase 1                                       | Q92918 | MAP4K1   | NA | Inverse variance weighted | 6  | -0.081 | 0.054 | 1.302E-01 | 0.879 | pan | Severe COVID-19 |
| 9815_5    | RHG01:CRAL-TRIO              | Rho GTPase-activating protein 1:Cellular retinaldehyde-TRIO domain                            | Q07960 | ARHGAP1  | NA | Wald ratio                | 1  | -0.545 | 0.361 | 1.306E-01 | 0.879 | pan | Severe COVID-19 |
| 5227_60   | PKD1                         | [Pyruvate dehydrogenase (acetyl-transferring)] kinase isozyme 1, mitochondrial                | Q15118 | PKD1     | NA | Inverse variance weighted | 3  | 0.157  | 0.104 | 1.308E-01 | 0.879 | pan | Severe COVID-19 |
| 13610_9   | MAGE-10                      | Melanoma-associated antigen 10                                                                | P43363 | MAGEA10  | NA | Inverse variance weighted | 2  | -0.426 | 0.283 | 1.314E-01 | 0.879 | pan | Severe COVID-19 |
| 17671_58  | ING4                         | Inhibitor of growth protein 4                                                                 | Q9UNL4 | ING4     | NA | Inverse variance weighted | 4  | 0.236  | 0.157 | 1.315E-01 | 0.879 | pan | Severe COVID-19 |
| 10451_11  | NUCB1                        | Nucleobindin-1                                                                                | Q02818 | NUCB1    | NA | Wald ratio                | 1  | 0.225  | 0.149 | 1.317E-01 | 0.879 | pan | Severe COVID-19 |
| 9779_63   | HERP2                        | Homocysteine-responsive endoplasmic reticulum-resident ubiquitin-like domain member 2 protein | Q9B5E4 | HERPUD2  | NA | Wald ratio                | 1  | 0.480  | 0.319 | 1.319E-01 | 0.879 | pan | Severe COVID-19 |
| 4192_10   | AK1A1                        | Alcohol dehydrogenase [NADP(+)]                                                               | P14550 | AKR1A1   | NA | Inverse variance weighted | 10 | 0.066  | 0.044 | 1.323E-01 | 0.879 | pan | Severe COVID-19 |
| 18183_3   | ARH                          | Low density lipoprotein receptor adapter protein 1                                            | Q5SW96 | LDLRAP1  | NA | Wald ratio                | 1  | -0.275 | 0.183 | 1.330E-01 | 0.879 | pan | Severe COVID-19 |
| 8289_8    | GNPMB-ECD                    | Transmembrane glycoprotein NMB:Extracellular domain                                           | Q14956 | GNPMB    | NA | Inverse variance weighted | 8  | -0.090 | 0.060 | 1.333E-01 | 0.879 | pan | Severe COVID-19 |
| 18408_26  | ARF4                         | ADP-ribosylation factor 4                                                                     | P18085 | ARF4     | NA | Wald ratio                | 1  | -0.516 | 0.344 | 1.334E-01 | 0.879 | pan | Severe COVID-19 |
| 8337_65   | PTPRU                        | Receptor-type tyrosine-protein phosphatase U                                                  | Q92729 | PTPRU    | NA | Inverse variance weighted | 5  | -0.147 | 0.098 | 1.350E-01 | 0.882 | pan | Severe COVID-19 |
| 3461_58   | PGCB                         | Brevican core protein                                                                         | Q96GW7 | BCAN     | NA | Inverse variance weighted | 3  | -0.181 | 0.121 | 1.352E-01 | 0.882 | pan | Severe COVID-19 |
| 2966_65   | SCGF-beta                    | Stem cell growth factor-beta                                                                  | Q9Y240 | CLEC11A  | NA | Inverse variance weighted | 2  | 0.380  | 0.254 | 1.358E-01 | 0.882 | pan | Severe COVID-19 |
| 5731_1    | ISK6                         | Serine protease inhibitor Kazal-type 6                                                        | Q6UWN8 | SPINK6   | NA | Inverse variance weighted | 13 | -0.067 | 0.045 | 1.362E-01 | 0.882 | pan | Severe COVID-19 |
| 3175_51   | ATS13                        | A disintegrin and metalloproteinase with thrombospondin motifs 13                             | Q76LX8 | ADAMTS13 | NA | Inverse variance weighted | 13 | -0.070 | 0.047 | 1.366E-01 | 0.882 | pan | Severe COVID-19 |
| 5649_83   | PSG4                         | Pregnancy-specific beta-1-glycoprotein 4                                                      | Q00888 | PSG4     | NA | Inverse variance weighted | 4  | 0.258  | 0.173 | 1.367E-01 | 0.882 | pan | Severe COVID-19 |
| 12643_4   | ARRB1                        | Beta-arrestin-1                                                                               | P49407 | ARRB1    | NA | Wald ratio                | 1  | -0.288 | 0.194 | 1.379E-01 | 0.882 | pan | Severe COVID-19 |
| 10977_55  | UCMA                         | Unique cartilage matrix-associated protein                                                    | Q8WVF2 | UCMA     | NA | Inverse variance weighted | 8  | 0.074  | 0.050 | 1.381E-01 | 0.882 | pan | Severe COVID-19 |
| 18174_79  | PDC6i                        | Programmed cell death 6-interacting protein                                                   | Q8WUM4 | PDCD6IP  | NA | Inverse variance weighted | 2  | -0.201 | 0.136 | 1.384E-01 | 0.882 | pan | Severe COVID-19 |
| 15388_24  | FcR1IIa                      | Low affinity immunoglobulin gamma Fc region receptor III-A                                    | P08637 | FCGR3A   | NA | Inverse variance weighted | 11 | -0.105 | 0.071 | 1.389E-01 | 0.882 | pan | Severe COVID-19 |
| 5810_25   | Cripto                       | Teratocarcinoma-derived growth factor 1                                                       | P13385 | TGDF1    | NA | Inverse variance weighted | 20 | -0.075 | 0.051 | 1.396E-01 | 0.882 | pan | Severe COVID-19 |
| 9385_4    | GAA                          | Lysosomal alpha-glucosidase                                                                   | P10253 | GAA      | NA | Inverse variance weighted | 6  | -0.111 | 0.075 | 1.398E-01 | 0.882 | pan | Severe COVID-19 |
| 7856_51   | F151A                        | Protein FAM151A                                                                               | Q8WW52 | FAM151A  | NA | Inverse variance weighted | 11 | -0.075 | 0.051 | 1.399E-01 | 0.882 | pan | Severe COVID-19 |
| 9100_32   | CE046                        | Uncharacterized protein C5orf46                                                               | Q6UWT4 | C5orf46  | NA | Wald ratio                | 1  | -0.302 | 0.205 | 1.401E-01 | 0.882 | pan | Severe COVID-19 |
| 17153_46  | KI2L3                        | Killer cell immunoglobulin-like receptor 2DL3                                                 | P43628 | KIR2DL3  | NA | Inverse variance weighted | 10 | 0.112  | 0.076 | 1.405E-01 | 0.882 | pan | Severe COVID-19 |
| 15299_102 | MESD2                        | LDLR chaperone MESD                                                                           | Q14696 | MESD     | NA | Wald ratio                | 1  | 0.484  | 0.329 | 1.411E-01 | 0.882 | pan | Severe COVID-19 |
| 12501_10  | TBCA                         | Tubulin-specific chaperone A                                                                  | O75347 | TBCA     | NA | Inverse variance weighted | 4  | 0.205  | 0.140 | 1.418E-01 | 0.882 | pan | Severe COVID-19 |
| 5358_3    | OMD                          | Osteomodulin                                                                                  | Q99983 | OMD      | NA | Inverse variance weighted | 3  | 0.246  | 0.168 | 1.423E-01 | 0.882 | pan | Severe COVID-19 |
| 3324_51   | LY9                          | T-lymphocyte surface antigen Ly-9                                                             | Q9HBG7 | LY9      | NA | Inverse variance weighted | 6  | 0.119  | 0.081 | 1.428E-01 | 0.882 | pan | Severe COVID-19 |
| 9638_2    | TIGIT                        | T-cell immunoreceptor with Ig and ITIM domains                                                | Q495A1 | TIGIT    | NA | Wald ratio                | 1  | -0.285 | 0.195 | 1.444E-01 | 0.882 | pan | Severe COVID-19 |
| 3420_21   | Carbonic anhydrase XIII      | Carbonic anhydrase 13                                                                         | Q8N1Q1 | CA13     | NA | Inverse variance weighted | 5  | -0.068 | 0.047 | 1.450E-01 | 0.882 | pan | Severe COVID-19 |
| 12347_29  | CCM2                         | Cerebral cavernous malformations 2 protein                                                    | Q9BSQ5 | CCM2     | NA | Wald ratio                | 1  | -0.359 | 0.247 | 1.453E-01 | 0.882 | pan | Severe COVID-19 |
| 12717_65  | TOX3                         | TOX high mobility group box family member 3                                                   | O15405 | TOX3     | NA | Wald ratio                | 1  | -0.445 | 0.305 | 1.453E-01 | 0.882 | pan | Severe COVID-19 |
| 5107_7    | Notch 1                      | Neurogenic locus notch homolog protein 1                                                      | P46531 | NOTCH1   | NA | Inverse variance weighted | 3  | 0.203  | 0.140 | 1.457E-01 | 0.882 | pan | Severe COVID-19 |
| 18382_109 | Catechol O-methyltransferase | Catechol O-methyltransferase                                                                  | P21964 | COMT     | NA | Wald ratio                | 1  | -0.246 | 0.169 | 1.457E-01 | 0.882 | pan | Severe COVID-19 |
| 9094_5    | CLC4C                        | C-type lectin domain family 4 member C                                                        | Q8WTT0 | CLEC4C   | NA | Inverse variance weighted | 19 | -0.136 | 0.093 | 1.458E-01 | 0.882 | pan | Severe COVID-19 |
| 15620_4   | NLGN1                        | Neuroigin-1                                                                                   | Q8NZQ7 | NLGN1    | NA | Inverse variance weighted | 3  | 0.264  | 0.182 | 1.465E-01 | 0.882 | pan | Severe COVID-19 |
| 4964_67   | ARTS1                        | Endoplasmic reticulum aminopeptidase 1                                                        | Q9NZ08 | ERAP1    | NA | Inverse variance weighted | 22 | -0.050 | 0.034 | 1.467E-01 | 0.882 | pan | Severe COVID-19 |
| 6611_8    | KDEL1                        | KDEL motif-containing protein 1                                                               | Q6UW63 | POGLUT2  | NA | Wald ratio                | 1  | 0.488  | 0.337 | 1.467E-01 | 0.882 | pan | Severe COVID-19 |
| 3348_49   | BMP-1                        | Bone morphogenetic protein 1                                                                  | P13497 | BMP1     | NA | Wald ratio                | 1  | 0.336  | 0.232 | 1.471E-01 | 0.882 | pan | Severe COVID-19 |
| 13642_90  | CIG49                        | Interferon-induced protein with tetratricopeptide repeats 3                                   | O14879 | IFIT3    | NA | Inverse variance weighted | 2  | 0.251  | 0.173 | 1.472E-01 | 0.882 | pan | Severe COVID-19 |
| 9172_69   | MMP-8                        | Neutrophil collagenase                                                                        | P22894 | MMP8     | NA | Inverse variance weighted | 7  | -0.138 | 0.096 | 1.477E-01 | 0.882 | pan | Severe COVID-19 |
| 5236_2    | NR101                        | Nuclear receptor subfamily 1 group D member 1                                                 | P20393 | NR101    | NA | Wald ratio                | 1  | -0.505 | 0.349 | 1.477E-01 | 0.882 | pan | Severe COVID-19 |
| 13931_22  | PSM09                        | 26S proteasome non-ATPase regulatory subunit 9                                                | O00233 | PSM09    | NA | Wald ratio                | 1  | 0.171  | 0.119 | 1.494E-01 | 0.882 | pan | Severe COVID-19 |
| 11192_168 | TINAL                        | Tubulointerstitial nephritis antigen-like                                                     | Q9GZM7 | TINAGL1  | NA | Inverse variance weighted | 8  | -0.094 | 0.065 | 1.496E-01 | 0.882 | pan | Severe COVID-19 |
| 15383_200 | Endothelin 3                 | Endothelin-3                                                                                  | P14138 | EDN3     | NA | Wald ratio                | 1  | -0.641 | 0.445 | 1.498E-01 | 0.882 | pan | Severe COVID-19 |
| 6506_54   | TMEDA                        | Transmembrane emp24 domain-containing protein 10                                              | P49755 | TMED10   | NA | Inverse variance weighted | 6  | 0.195  | 0.136 | 1.505E-01 | 0.882 | pan | Severe COVID-19 |
| 17419_17  | TES                          | Testin                                                                                        | Q9UGI8 | TES      | NA | Wald ratio                | 1  | -0.284 | 0.198 | 1.506E-01 | 0.882 | pan | Severe COVID-19 |
| 13524_25  | H6S72                        | Heparan-sulfate 6-O-sulfotransferase 2                                                        | Q96MM7 | H56S72   | NA | Wald ratio                | 1  | -0.371 | 0.259 | 1.509E-01 | 0.882 | pan | Severe COVID-19 |
| 15514_26  | Pseudocholinesterase         | Cholinesterase                                                                                | P06276 | BCHE     | NA | Inverse variance weighted | 15 | 0.103  | 0.072 | 1.515E-01 | 0.882 | pan | Severe COVID-19 |
| 9744_139  | DNJA4                        | DnaI homolog subfamily A member 4                                                             | Q8WW22 | DNJA4    | NA | Wald ratio                | 1  | 0.451  | 0.315 | 1.519E-01 | 0.882 | pan | Severe COVID-19 |
| 8248_222  | SIG14                        | Sialic acid-binding Ig-like lectin 14                                                         | Q08E72 | SIGLEC14 | NA | Inverse variance weighted | 4  | 0.196  | 0.137 | 1.522E-01 | 0.882 | pan | Severe COVID-19 |
| 3459_49   | PDGFRb                       | Platelet-derived growth factor receptor beta                                                  | P09619 | PDGFRB   | NA | Inverse variance weighted | 12 | -0.024 | 0.016 | 1.523E-01 | 0.882 | pan | Severe COVID-19 |
| 4209_60   | DRG-1                        | Vacuolar protein sorting-associated protein VTA1 homolog                                      | Q9NP79 | VTA1     | NA | Wald ratio                | 1  | -0.401 | 0.280 | 1.524E-01 | 0.882 | pan | Severe COVID-19 |
| 15480_2   | VNN2                         | Vascular non-inflammatory molecule 2                                                          | O95498 | VNN2     | NA | Inverse variance weighted | 16 | 0.035  | 0.025 | 1.527E-01 | 0.882 | pan | Severe COVID-19 |
| 6984_6    | IGSF8                        | Immunoglobulin superfamily member 8                                                           | Q969P0 | IGSF8    | NA | Inverse variance weighted | 2  | 0.144  | 0.101 | 1.531E-01 | 0.882 | pan | Severe COVID-19 |
| 2939_10   | Artemin                      | Artemin                                                                                       | Q5T4W7 | ARTN     | NA | Wald ratio                | 1  | 0.478  | 0.335 | 1.534E-01 | 0.882 | pan | Severe COVID-19 |
| 3344_60   | Antithrombin III             | Antithrombin-III                                                                              | P01008 | SERPINC1 | NA | Wald ratio                | 1  | 0.337  | 0.236 | 1.539E-01 | 0.882 | pan | Severe COVID-19 |
| 12370_30  | Apo F                        | Apolipoprotein F                                                                              | Q13790 | APOF     | NA | Inverse variance weighted | 2  | -0.218 | 0.153 | 1.542E-01 | 0.882 | pan | Severe COVID-19 |
| 3431_54   | EphA1                        | Ephrin type-A receptor 1                                                                      | P21709 | EPHA1    | NA | Inverse variance weighted | 10 | -0.049 | 0.035 | 1.550E-01 | 0.882 | pan | Severe COVID-19 |
| 18310_26  | SELW                         | Selenoprotein W                                                                               | P63302 | SELENOW  | NA | Inverse variance weighted | 8  | 0.085  | 0.060 | 1.553E-01 | 0.882 | pan | Severe COVID-19 |
| 5102_55   | MICB                         | MHC class I polypeptide-related sequence B                                                    | Q29980 | MICB     | NA | Inverse variance weighted | 14 | 0.073  | 0.051 | 1.558E-01 | 0.882 | pan | Severe COVID-19 |
| 8903_1    | COX6C                        | Cytochrome c oxidase subunit 6C                                                               | P09669 | COX6C    | NA | Inverse variance weighted | 4  | 0.202  | 0.143 | 1.563E-01 | 0.882 | pan | Severe COVID-19 |
| 9838_4    | SMA01                        | Mothers against decapentaplegic homolog 1                                                     | Q15797 | SMA01    | NA | Wald ratio                | 1  | -0.537 | 0.380 | 1.569E-01 | 0.882 | pan | Severe COVID-19 |
| 4498_62   | NCAM-120                     | Neural cell adhesion molecule 1, 120 kDa isoform                                              | P13591 | NCAM1    | NA | Inverse variance weighted | 12 | 0.072  | 0.051 | 1.572E-01 | 0.882 | pan | Severe COVID-19 |
| 5660_51   | SOD3                         | Extracellular superoxide dismutase [Cu-Zn]                                                    | P08294 | SOD3     | NA | Inverse variance weighted | 15 | -0.050 | 0.035 | 1.572E-01 | 0.882 | pan | Severe COVID-19 |
| 9039_47   | TOIP1:Nuclear                | Torsin-1A-interacting protein 1:Nuclear domain                                                | Q5JTV8 | TOR1AIP1 | NA | Inverse variance weighted | 2  | 0.307  | 0.217 | 1.573E-01 | 0.882 | pan | Severe COVID-19 |
| 4568_17   | SLIK5                        | SLIT and NTRK-like protein 5                                                                  | O94991 | SLITRK5  | NA | Inverse variance weighted | 4  | 0.150  | 0.107 | 1.582E-01 | 0.882 | pan | Severe COVID-19 |
| 10042_8   | SGK3                         | Serine/threonine-protein kinase Sgk3                                                          | Q968R1 | SGK3     | NA | Wald ratio                | 1  | 0.484  | 0.343 | 1.587E-01 | 0.882 | pan | Severe COVID-19 |
| 10630_5   | HTA12                        | Oxidoreductase HTA1P2                                                                         | Q9BU93 | HTA1P2   | NA | Inverse variance weighted | 9  | -0.056 | 0.039 | 1.588E-01 | 0.882 | pan | Severe COVID-19 |
| 8006_12   | DJB12                        | DnaI homolog subfamily B member 12                                                            | Q9NWX2 | DNABJ12  | NA | Inverse variance weighted | 2  | 0.171  | 0.122 | 1.588E-01 | 0.882 | pan | Severe COVID-19 |
| 2946_52   | Factor D                     | Complement factor D                                                                           | P00746 | CFD      | NA | Inverse variance weighted | 5  | 0.172  | 0.123 | 1.606E-01 | 0.885 | pan | Severe COVID-19 |
| 17805_35  | SPF30                        | Survival of motor neuron-related-splicing factor 30                                           | O75940 | SMNDC1   | NA | Wald ratio                | 1  | -0.461 | 0.329 | 1.619E-01 | 0.885 | pan | Severe COVID-19 |
| 5584_21   | Holo-TC II                   | Holo-Transcobalamin-2                                                                         | P20062 | TCN2     | NA | Inverse variance weighted | 12 | 0.107  | 0.077 | 1.620E-01 | 0.885 | pan | Severe COVID-19 |
| 18873_8   | CEAM8                        | Carcinoembryonic antigen-related cell adhesion molecule 8                                     | P31997 | CEACAM8  | NA | Inverse variance weighted | 12 | 0.113  | 0.081 | 1.621E-01 | 0.885 | pan | Severe COVID-19 |
| 11530_37  | HEM3                         | Porphobilinogen deaminase                                                                     | P08397 | HMB3     | NA | Wald ratio                | 1  | 0.407  | 0.292 | 1.624E-01 | 0.885 | pan | Severe COVID-19 |
| 19488_1   | PCDC6                        | Programmed cell death protein 6                                                               | O75340 | PCDC6    | NA | Inverse variance weighted | 3  | 0.135  | 0.097 | 1.625E-01 | 0.885 | pan | Severe COVID-19 |

|           |                            |                                                                            |        |          |    |                           |    |        |       |           |       |     |                 |
|-----------|----------------------------|----------------------------------------------------------------------------|--------|----------|----|---------------------------|----|--------|-------|-----------|-------|-----|-----------------|
| 7784_1    | Kininogen, HMW             | Kininogen-1                                                                | P01042 | KNG1     | NA | Inverse variance weighted | 2  | 0.322  | 0.230 | 1.625E-01 | 0.885 | pan | Severe COVID-19 |
| 7918_114  | Amylase, alpha 1A          | Alpha-amylase 1                                                            | P04745 | AMY1A    | NA | Inverse variance weighted | 17 | 0.078  | 0.056 | 1.628E-01 | 0.885 | pan | Severe COVID-19 |
| 16621_77  | AIBP                       | NAD(P)H-hydrate epimerase                                                  | Q8NCW5 | NAXE     | NA | Wald ratio                | 1  | 0.111  | 0.080 | 1.641E-01 | 0.889 | pan | Severe COVID-19 |
| 9221_6    | IPIL1                      | Inositol 1,4,5-trisphosphate receptor-interacting protein-like 1           | Q6GPH6 | ITPR1PL1 | NA | Inverse variance weighted | 5  | -0.089 | 0.064 | 1.643E-01 | 0.889 | pan | Severe COVID-19 |
| 7980_72   | B3GN2                      | N-acetyllactosaminide beta-1,3-N-acetylglucosaminyltransferase 2           | Q9NY97 | B3GN2T   | NA | Inverse variance weighted | 5  | 0.170  | 0.122 | 1.652E-01 | 0.892 | pan | Severe COVID-19 |
| 5722_78   | Prolylcarboxypeptidase     | Lysosomal Pro-X carboxypeptidase                                           | P42785 | PRCP     | NA | Inverse variance weighted | 8  | 0.119  | 0.086 | 1.660E-01 | 0.894 | pan | Severe COVID-19 |
| 7179_69   | NFASC                      | Neurofascin                                                                | O94856 | NFASC    | NA | Inverse variance weighted | 4  | 0.057  | 0.041 | 1.671E-01 | 0.896 | pan | Severe COVID-19 |
| 6409_57   | GP116                      | Adhesion G protein-coupled receptor F5                                     | Q8ZF2  | ADGRF5   | NA | Inverse variance weighted | 12 | -0.033 | 0.024 | 1.675E-01 | 0.896 | pan | Severe COVID-19 |
| 2571_12   | IGFBP-3                    | Insulin-like growth factor-binding protein 3                               | P17936 | IGFBP3   | NA | Inverse variance weighted | 8  | 0.075  | 0.055 | 1.676E-01 | 0.896 | pan | Severe COVID-19 |
| 11134_30  | RF1ML                      | Peptide chain release factor 1-like, mitochondrial                         | Q5UGC7 | MTRF1L   | NA | Wald ratio                | 1  | 0.130  | 0.094 | 1.690E-01 | 0.900 | pan | Severe COVID-19 |
| 3327_27   | NET4                       | Netrin-4                                                                   | Q9HB63 | NTN4     | NA | Inverse variance weighted | 5  | 0.149  | 0.108 | 1.693E-01 | 0.900 | pan | Severe COVID-19 |
| 7923_41   | SEM4C                      | Semaphorin-4C                                                              | Q9C0C4 | SEMA4C   | NA | Inverse variance weighted | 10 | 0.115  | 0.084 | 1.716E-01 | 0.910 | pan | Severe COVID-19 |
| 11449_22  | CAZA1                      | F-actin-capping protein subunit alpha-1                                    | P52907 | CAP2A1   | NA | Wald ratio                | 1  | -0.566 | 0.414 | 1.721E-01 | 0.910 | pan | Severe COVID-19 |
| 8778_3    | Noggin                     | Noggin                                                                     | Q13253 | NOG      | NA | Inverse variance weighted | 11 | 0.065  | 0.047 | 1.724E-01 | 0.910 | pan | Severe COVID-19 |
| 6904_14   | LRRT2                      | Leucine-rich repeat transmembrane neuronal protein 2                       | O43300 | LRRTM2   | NA | Inverse variance weighted | 3  | 0.162  | 0.119 | 1.730E-01 | 0.910 | pan | Severe COVID-19 |
| 15576_158 | ECP                        | Eosinophil cationic protein                                                | P12724 | RNASE3   | NA | Inverse variance weighted | 9  | 0.051  | 0.038 | 1.732E-01 | 0.910 | pan | Severe COVID-19 |
| 13450_49  | UBP8                       | Ubiquitin carboxyl-terminal hydrolase 8                                    | P40818 | USP8     | NA | Wald ratio                | 1  | 0.244  | 0.179 | 1.743E-01 | 0.913 | pan | Severe COVID-19 |
| 4234_8    | IL-1 R4                    | Interleukin-1 receptor-like 1                                              | Q01638 | IL1RL1   | NA | Inverse variance weighted | 24 | -0.056 | 0.041 | 1.751E-01 | 0.915 | pan | Severe COVID-19 |
| 6227_1    | kallikrein 10              | Kallikrein-10                                                              | O43240 | KLK10    | NA | Inverse variance weighted | 8  | 0.090  | 0.067 | 1.758E-01 | 0.915 | pan | Severe COVID-19 |
| 5620_13   | AMD                        | Peptidyl-glycine alpha-amidating monooxygenase                             | P19021 | PAM      | NA | Inverse variance weighted | 19 | 0.043  | 0.032 | 1.759E-01 | 0.915 | pan | Severe COVID-19 |
| 9522_3    | AIF                        | Apoptosis-inducing factor 1, mitochondrial                                 | O95831 | AIFM1    | NA | Wald ratio                | 1  | 0.355  | 0.263 | 1.767E-01 | 0.917 | pan | Severe COVID-19 |
| 9896_21   | FOXGB                      | Forkhead box protein G1                                                    | P55316 | FOXG1    | NA | Inverse variance weighted | 2  | 0.361  | 0.267 | 1.773E-01 | 0.918 | pan | Severe COVID-19 |
| 17156_72  | DCAK1                      | Serine/threonine-protein kinase DCLK1                                      | O15075 | DCLK1    | NA | Inverse variance weighted | 6  | 0.088  | 0.065 | 1.780E-01 | 0.919 | pan | Severe COVID-19 |
| 17686_27  | TBCB                       | Tubulin-folding cofactor B                                                 | O99426 | TBCB     | NA | Wald ratio                | 1  | 0.319  | 0.238 | 1.793E-01 | 0.921 | pan | Severe COVID-19 |
| 12859_33  | PECI                       | Enoyl-CoA delta isomerase 2, mitochondrial                                 | O75521 | ECI2     | NA | Inverse variance weighted | 4  | -0.071 | 0.053 | 1.795E-01 | 0.921 | pan | Severe COVID-19 |
| 17454_15  | EGFL6                      | Epidermal growth factor-like protein 6                                     | Q8IUXX | EGFL6    | NA | Inverse variance weighted | 5  | 0.184  | 0.137 | 1.797E-01 | 0.921 | pan | Severe COVID-19 |
| 4131_72   | Fibronectin                | Fibronectin                                                                | P02751 | FN1      | NA | Inverse variance weighted | 2  | 0.413  | 0.309 | 1.811E-01 | 0.923 | pan | Severe COVID-19 |
| 10605_22  | APMAP                      | Adipocyte plasma membrane-associated protein                               | Q9HDC9 | APMAP    | NA | Wald ratio                | 1  | 0.351  | 0.262 | 1.812E-01 | 0.923 | pan | Severe COVID-19 |
| 5716_49   | CSAG1                      | Putative chondrosarcoma-associated gene 1 protein                          | Q6PB30 | CSAG1    | NA | Inverse variance weighted | 3  | 0.210  | 0.157 | 1.813E-01 | 0.923 | pan | Severe COVID-19 |
| 11696_7   | RABP2                      | Cellular retinoic acid-binding protein 2                                   | P29373 | CRABP2   | NA | Wald ratio                | 1  | 0.127  | 0.095 | 1.821E-01 | 0.923 | pan | Severe COVID-19 |
| 9213_24   | FTCD                       | Formimidoyltransferase-cyclodeaminase                                      | O95954 | FTCD     | NA | Inverse variance weighted | 3  | -0.134 | 0.100 | 1.822E-01 | 0.923 | pan | Severe COVID-19 |
| 19448_104 | UPP1                       | Uridine phosphorylase 1                                                    | Q16831 | UPP1     | NA | Wald ratio                | 1  | -0.280 | 0.211 | 1.829E-01 | 0.924 | pan | Severe COVID-19 |
| 16304_6   | LGR4                       | Leucine-rich repeat-containing G-protein coupled receptor 4                | Q9XB81 | LGR4     | NA | Inverse variance weighted | 3  | 0.199  | 0.149 | 1.834E-01 | 0.924 | pan | Severe COVID-19 |
| 11237_49  | PCOC1                      | Procollagen C-endopeptidase enhancer 1                                     | Q15113 | PCOLCE   | NA | Inverse variance weighted | 4  | 0.257  | 0.194 | 1.848E-01 | 0.924 | pan | Severe COVID-19 |
| 3827_22   | PAK6                       | Serine/threonine-protein kinase PAK 6                                      | Q9NQJ5 | PAK6     | NA | Wald ratio                | 1  | -0.141 | 0.107 | 1.858E-01 | 0.924 | pan | Severe COVID-19 |
| 17694_32  | PSME2                      | Proteasome activator complex subunit 2                                     | Q9UL46 | PSME2    | NA | Inverse variance weighted | 2  | -0.204 | 0.155 | 1.861E-01 | 0.924 | pan | Severe COVID-19 |
| 7624_19   | ANK2                       | Ankyrin-2                                                                  | Q01484 | ANK2     | NA | Inverse variance weighted | 5  | 0.128  | 0.097 | 1.865E-01 | 0.924 | pan | Severe COVID-19 |
| 9237_54   | Lysosomal acid phosphatase | Lysosomal acid phosphatase                                                 | P11117 | ACP2     | NA | Inverse variance weighted | 3  | -0.227 | 0.172 | 1.875E-01 | 0.924 | pan | Severe COVID-19 |
| 13381_49  | B4GT1                      | Beta-1,4-galactosyltransferase 1                                           | P15291 | B4GALT1  | NA | Inverse variance weighted | 6  | -0.144 | 0.109 | 1.881E-01 | 0.924 | pan | Severe COVID-19 |
| 2211_9    | TIMP-1                     | Metalloproteinase inhibitor 1                                              | P01033 | TIMP1    | NA | Wald ratio                | 1  | 0.414  | 0.314 | 1.881E-01 | 0.924 | pan | Severe COVID-19 |
| 13447_42  | SPRN                       | Shadow of prion protein                                                    | Q5BIV9 | SPRN     | NA | Inverse variance weighted | 2  | -0.324 | 0.247 | 1.883E-01 | 0.924 | pan | Severe COVID-19 |
| 14205_6   | HEX12                      | Protein HEXIM2                                                             | Q96MH2 | HEXIM2   | NA | Wald ratio                | 1  | 0.426  | 0.324 | 1.884E-01 | 0.924 | pan | Severe COVID-19 |
| 4763_31   | Afamin                     | Afamin                                                                     | P43652 | AFM      | NA | Inverse variance weighted | 8  | 0.080  | 0.061 | 1.888E-01 | 0.924 | pan | Severe COVID-19 |
| 2658_27   | TrkC                       | NT-3 growth factor receptor                                                | Q16288 | NTRK3    | NA | Inverse variance weighted | 6  | -0.105 | 0.080 | 1.893E-01 | 0.924 | pan | Severe COVID-19 |
| 10045_47  | CUL3                       | Cullin-3                                                                   | Q13618 | CUL3     | NA | Wald ratio                | 1  | 0.229  | 0.175 | 1.899E-01 | 0.924 | pan | Severe COVID-19 |
| 13733_5   | IL-12 p40                  | Interleukin-12 subunit beta                                                | P29460 | IL12B    | NA | Inverse variance weighted | 15 | -0.068 | 0.052 | 1.901E-01 | 0.924 | pan | Severe COVID-19 |
| 19187_21  | STABP                      | STAM-binding protein                                                       | O95630 | STAMBP   | NA | Inverse variance weighted | 2  | 0.259  | 0.198 | 1.902E-01 | 0.924 | pan | Severe COVID-19 |
| 19601_15  | ASB9                       | Ankyrin repeat and SOCS box protein 9                                      | Q96DK5 | ASB9     | NA | Wald ratio                | 1  | -0.114 | 0.087 | 1.902E-01 | 0.924 | pan | Severe COVID-19 |
| 2844_53   | sTie-1                     | Tyrosine-protein kinase receptor Tie-1, soluble                            | P35590 | TIE1     | NA | Inverse variance weighted | 16 | 0.064  | 0.049 | 1.902E-01 | 0.924 | pan | Severe COVID-19 |
| 14175_78  | SCP2D                      | SCP2 sterol-binding domain-containing protein 1                            | Q8UIQ7 | SCP2D1   | NA | Inverse variance weighted | 8  | -0.047 | 0.036 | 1.905E-01 | 0.924 | pan | Severe COVID-19 |
| 2700_56   | Protein S                  | Vitamin K-dependent protein S                                              | P07225 | PROS1    | NA | Inverse variance weighted | 2  | -0.274 | 0.209 | 1.913E-01 | 0.925 | pan | Severe COVID-19 |
| 15333_11  | SDF2                       | Stromal cell-derived factor 2                                              | Q99470 | SDF2     | NA | Inverse variance weighted | 8  | 0.147  | 0.113 | 1.919E-01 | 0.925 | pan | Severe COVID-19 |
| 13125_45  | Vitronectin                | Vitronectin                                                                | P04004 | VTN      | NA | Inverse variance weighted | 12 | -0.133 | 0.102 | 1.920E-01 | 0.925 | pan | Severe COVID-19 |
| 12460_18  | PSA7                       | Proteasome subunit alpha type-7                                            | O14818 | PSMA7    | NA | Inverse variance weighted | 3  | -0.119 | 0.092 | 1.927E-01 | 0.926 | pan | Severe COVID-19 |
| 13724_27  | FGF-19                     | Fibroblast growth factor 19                                                | O95750 | FGF19    | NA | Inverse variance weighted | 2  | 0.222  | 0.170 | 1.931E-01 | 0.926 | pan | Severe COVID-19 |
| 3060_43   | C9                         | Complement component C9                                                    | P02748 | C9       | NA | Inverse variance weighted | 6  | -0.119 | 0.092 | 1.938E-01 | 0.926 | pan | Severe COVID-19 |
| 13422_66  | ENOX2                      | Ecto-NOX disulfide-thiol exchanger 2                                       | Q16206 | ENOX2    | NA | Wald ratio                | 1  | 0.458  | 0.353 | 1.940E-01 | 0.926 | pan | Severe COVID-19 |
| 6603_18   | KALM                       | Anosmin-1                                                                  | P23352 | ANOS1    | NA | Inverse variance weighted | 3  | 0.155  | 0.120 | 1.961E-01 | 0.931 | pan | Severe COVID-19 |
| 5091_28   | ILT-4                      | Leukocyte immunoglobulin-like receptor subfamily 8 member 2                | Q8N423 | LILRB2   | NA | Inverse variance weighted | 3  | -0.365 | 0.283 | 1.968E-01 | 0.931 | pan | Severe COVID-19 |
| 7156_2    | FUT10                      | Alpha-(1,3)-fucosyltransferase 10                                          | Q6P4F1 | FUT10    | NA | Inverse variance weighted | 16 | 0.037  | 0.029 | 1.968E-01 | 0.931 | pan | Severe COVID-19 |
| 9249_17   | TMEM9-ECD                  | Transmembrane protein 9:Extracellular domain                               | O9P0T7 | TMEM9    | NA | Wald ratio                | 1  | -0.301 | 0.234 | 1.973E-01 | 0.931 | pan | Severe COVID-19 |
| 7099_33   | FSTL5                      | Follistatin-related protein 5                                              | Q8N475 | FSTL5    | NA | Wald ratio                | 1  | 0.189  | 0.147 | 1.974E-01 | 0.931 | pan | Severe COVID-19 |
| 5813_58   | Epo                        | Erythropoietin                                                             | P01588 | EPO      | NA | Inverse variance weighted | 5  | 0.129  | 0.100 | 1.976E-01 | 0.931 | pan | Severe COVID-19 |
| 13526_5   | LA:RRM                     | Lupus La protein:RNA recognition motif                                     | P05455 | S58      | NA | Wald ratio                | 1  | -0.279 | 0.217 | 1.983E-01 | 0.932 | pan | Severe COVID-19 |
| 3519_3    | TARC                       | C-C motif chemokine 17                                                     | Q92583 | CCL17    | NA | Inverse variance weighted | 18 | -0.051 | 0.039 | 1.988E-01 | 0.933 | pan | Severe COVID-19 |
| 3845_51   | DLRB1                      | Dynein light chain roadblock-type 1                                        | Q9NP97 | DYNLRB1  | NA | Inverse variance weighted | 8  | 0.109  | 0.085 | 1.993E-01 | 0.933 | pan | Severe COVID-19 |
| 6407_63   | LAD1                       | Ladinin-1                                                                  | O00515 | LAD1     | NA | Wald ratio                | 1  | 0.601  | 0.468 | 1.998E-01 | 0.933 | pan | Severe COVID-19 |
| 5103_30   | MO2R1-ECD                  | Cell surface glycoprotein CD200 receptor 1:Isoform 4, Extracellular Domain | Q8TD46 | CD200R1  | NA | Wald ratio                | 1  | 0.170  | 0.133 | 2.011E-01 | 0.936 | pan | Severe COVID-19 |
| 5463_22   | GAS1                       | Growth arrest-specific protein 1                                           | P54826 | GAS1     | NA | Inverse variance weighted | 2  | -0.167 | 0.131 | 2.012E-01 | 0.936 | pan | Severe COVID-19 |
| 15370_5   | BOLA1                      | Bola-like protein 1                                                        | Q9Y3E2 | BOLA1    | NA | Inverse variance weighted | 12 | -0.047 | 0.037 | 2.018E-01 | 0.937 | pan | Severe COVID-19 |
| 9748_31   | GSTM3-3                    | Glutathione S-transferase Mu 3                                             | P21266 | GSTM3    | NA | Inverse variance weighted | 7  | 0.071  | 0.056 | 2.031E-01 | 0.940 | pan | Severe COVID-19 |
| 6415_90   | CPN2                       | Carboxypeptidase N subunit 2                                               | P22792 | CPN2     | NA | Inverse variance weighted | 6  | 0.116  | 0.092 | 2.047E-01 | 0.944 | pan | Severe COVID-19 |
| 17691_1   | TPP1                       | Tripeptidyl-peptidase 1                                                    | O14773 | TPP1     | NA | Inverse variance weighted | 6  | -0.088 | 0.070 | 2.049E-01 | 0.944 | pan | Severe COVID-19 |
| 13098_93  | VEGF-D                     | Vascular endothelial growth factor D                                       | O43915 | VEGFD    | NA | Wald ratio                | 1  | 0.444  | 0.351 | 2.052E-01 | 0.944 | pan | Severe COVID-19 |
| 4962_52   | ARMEL                      | Cerebral dopamine neurotrophic factor                                      | Q49AHO | CDNF     | NA | Inverse variance weighted | 5  | -0.104 | 0.082 | 2.057E-01 | 0.944 | pan | Severe COVID-19 |
| 3470_1    | sE-Selectin                | E-selectin                                                                 | P16581 | SELE     | NA | Inverse variance weighted | 8  | 0.113  | 0.090 | 2.077E-01 | 0.948 | pan | Severe COVID-19 |
| 15417_3   | Maspin                     | Serpin B5                                                                  | P36952 | SERPINB5 | NA | Wald ratio                | 1  | -0.147 | 0.117 | 2.085E-01 | 0.948 | pan | Severe COVID-19 |
| 6899_37   | PHS2                       | Pterin-4-alpha-carbinolamine dehydratase 2                                 | Q9H0N5 | PCBD2    | NA | Inverse variance weighted | 4  | 0.267  | 0.213 | 2.090E-01 | 0.948 | pan | Severe COVID-19 |

|           |                            |                                                                                                   |        |          |    |                           |    |        |       |           |       |     |                 |
|-----------|----------------------------|---------------------------------------------------------------------------------------------------|--------|----------|----|---------------------------|----|--------|-------|-----------|-------|-----|-----------------|
| 8296_117  | KDEL2                      | KDEL motif-containing protein 2                                                                   | Q724H8 | POGLUT3  | NA | Inverse variance weighted | 8  | 0.064  | 0.051 | 2.092E-01 | 0.948 | pan | Severe COVID-19 |
| 6586_19   | ADA11                      | Disintegrin and metalloproteinase domain-containing protein 11                                    | O75078 | ADAM11   | NA | Wald ratio                | 1  | 0.207  | 0.165 | 2.094E-01 | 0.948 | pan | Severe COVID-19 |
| 19437_61  | L-VEGF165                  | Isoform L-VEGF165                                                                                 | P15692 | VEGFA    | NA | Inverse variance weighted | 6  | -0.150 | 0.120 | 2.095E-01 | 0.948 | pan | Severe COVID-19 |
| 19367_34  | D3D2                       | Enoyl-CoA delta isomerase 1, mitochondrial                                                        | P42126 | EC11     | NA | Inverse variance weighted | 2  | -0.238 | 0.189 | 2.096E-01 | 0.948 | pan | Severe COVID-19 |
| 3284_75   | BGN                        | Biglycan                                                                                          | P21810 | BGN      | NA | Inverse variance weighted | 13 | -0.065 | 0.052 | 2.106E-01 | 0.950 | pan | Severe COVID-19 |
| 7957_2    | SCG3                       | Secretogranin-3                                                                                   | Q8WXD2 | SCG3     | NA | Inverse variance weighted | 10 | -0.054 | 0.044 | 2.115E-01 | 0.951 | pan | Severe COVID-19 |
| 9960_2    | TBCD5                      | TBC1 domain family member 5                                                                       | Q92609 | TBC1D5   | NA | Wald ratio                | 1  | -0.367 | 0.294 | 2.116E-01 | 0.951 | pan | Severe COVID-19 |
| 8814_33   | SAPL1                      | Proactivator polypeptide-like 1                                                                   | Q6NUJ1 | PSAPL1   | NA | Inverse variance weighted | 10 | -0.049 | 0.039 | 2.124E-01 | 0.952 | pan | Severe COVID-19 |
| 9341_1    | PDGFD                      | Platelet-derived growth factor D                                                                  | Q9GZP0 | PDGFD    | NA | Inverse variance weighted | 3  | -0.194 | 0.156 | 2.130E-01 | 0.952 | pan | Severe COVID-19 |
| 3864_5    | RS7                        | 40S ribosomal protein S7                                                                          | P62081 | RPS7     | NA | Wald ratio                | 1  | -0.378 | 0.304 | 2.137E-01 | 0.952 | pan | Severe COVID-19 |
| 10758_2   | KERA                       | Keratocan                                                                                         | O60938 | KERA     | NA | Inverse variance weighted | 2  | -0.279 | 0.225 | 2.139E-01 | 0.952 | pan | Severe COVID-19 |
| 15636_49  | SORC1                      | VPS10 domain-containing receptor SorCS1                                                           | Q8WY21 | SORC1    | NA | Wald ratio                | 1  | -0.287 | 0.231 | 2.142E-01 | 0.952 | pan | Severe COVID-19 |
| 17513_11  | ANX11                      | Annexin A11                                                                                       | P50995 | ANXA11   | NA | Inverse variance weighted | 3  | 0.149  | 0.120 | 2.153E-01 | 0.952 | pan | Severe COVID-19 |
| 6909_40   | MGAT2                      | Alpha-1,6-mannosyl-glycoprotein 2-beta-N-acetylglucosaminyltransferase                            | Q10469 | MGAT2    | NA | Inverse variance weighted | 2  | -0.214 | 0.173 | 2.156E-01 | 0.952 | pan | Severe COVID-19 |
| 11177_16  | K2C5                       | Keratin, type II cytoskeletal 5                                                                   | P13647 | KRT5     | NA | Inverse variance weighted | 6  | -0.149 | 0.120 | 2.159E-01 | 0.952 | pan | Severe COVID-19 |
| 4355_13   | DAPK2                      | Death-associated protein kinase 2                                                                 | Q9UIK4 | DAPK2    | NA | Inverse variance weighted | 5  | 0.169  | 0.137 | 2.163E-01 | 0.952 | pan | Severe COVID-19 |
| 18216_22  | IL-11 RA                   | Interleukin-11 receptor subunit alpha                                                             | Q14626 | IL11RA   | NA | Inverse variance weighted | 7  | -0.086 | 0.070 | 2.167E-01 | 0.952 | pan | Severe COVID-19 |
| 18280_29  | DTD2                       | Putative D-tyrosyl-tRNA(Tyr) deacylase 2                                                          | Q96FN9 | DTD2     | NA | Inverse variance weighted | 2  | -0.180 | 0.146 | 2.168E-01 | 0.952 | pan | Severe COVID-19 |
| 18875_125 | Chondrocalcin              | Chondrocalcin                                                                                     | P02458 | COL2A1   | NA | Inverse variance weighted | 18 | -0.039 | 0.031 | 2.189E-01 | 0.957 | pan | Severe COVID-19 |
| 11608_5   | MPLP3B                     | Microtubule-associated proteins 1A/1B light chain 3B                                              | Q9GZQ8 | MAP1LC3B | NA | Wald ratio                | 1  | -0.486 | 0.395 | 2.190E-01 | 0.957 | pan | Severe COVID-19 |
| 11493_169 | DYL2                       | Dynein light chain 2, cytoplasmic                                                                 | Q96FJ2 | DYNNL2   | NA | Wald ratio                | 1  | -0.357 | 0.292 | 2.212E-01 | 0.957 | pan | Severe COVID-19 |
| 10015_119 | KCAB2                      | Voltage-gated potassium channel subunit beta-2                                                    | Q13303 | KCNAB2   | NA | Inverse variance weighted | 2  | -0.238 | 0.195 | 2.214E-01 | 0.957 | pan | Severe COVID-19 |
| 16300_4   | TREM2                      | Triggering receptor expressed on myeloid cells 2                                                  | Q9NZC2 | TREM2    | NA | Inverse variance weighted | 20 | 0.042  | 0.034 | 2.215E-01 | 0.957 | pan | Severe COVID-19 |
| 4129_72   | Factor B                   | Complement factor B                                                                               | P00751 | CFB      | NA | Inverse variance weighted | 3  | -0.168 | 0.138 | 2.215E-01 | 0.957 | pan | Severe COVID-19 |
| 11481_25  | TIMD3                      | Hepatitis A virus cellular receptor 2                                                             | Q8TDQ0 | HAVCR2   | NA | Wald ratio                | 1  | -0.421 | 0.345 | 2.216E-01 | 0.957 | pan | Severe COVID-19 |
| 12457_10  | MTND                       | 1,2-dihydroxy-3-keto-5-methylthiopentene dioxigenase                                              | Q9BV57 | ADI1     | NA | Wald ratio                | 1  | 0.321  | 0.263 | 2.218E-01 | 0.957 | pan | Severe COVID-19 |
| 15560_52  | Apo-TC II                  | Transcobalamin-2                                                                                  | P20062 | TGN2     | NA | Inverse variance weighted | 10 | -0.043 | 0.035 | 2.222E-01 | 0.957 | pan | Severe COVID-19 |
| 19602_36  | jun-D                      | Transcription factor jun-D                                                                        | P17535 | JUND     | NA | Wald ratio                | 1  | -0.367 | 0.301 | 2.237E-01 | 0.957 | pan | Severe COVID-19 |
| 4159_130  | Factor H                   | Complement factor H                                                                               | P08603 | CFH      | NA | Wald ratio                | 1  | 0.284  | 0.233 | 2.237E-01 | 0.957 | pan | Severe COVID-19 |
| 7928_183  | TPST1                      | Protein-tyrosine sulfotransferase 1                                                               | O60507 | TPST1    | NA | Inverse variance weighted | 11 | 0.052  | 0.043 | 2.238E-01 | 0.957 | pan | Severe COVID-19 |
| 9928_125  | LECT1                      | Leukocyte cell-derived chemotaxin 1                                                               | O75829 | CNMD     | NA | Wald ratio                | 1  | -0.312 | 0.257 | 2.241E-01 | 0.957 | pan | Severe COVID-19 |
| 3376_49   | IL-17 RD                   | Interleukin-17 receptor D                                                                         | Q8NFM7 | IL17RD   | NA | Inverse variance weighted | 6  | 0.060  | 0.049 | 2.246E-01 | 0.957 | pan | Severe COVID-19 |
| 5654_70   | TMX3                       | Protein disulfide-isomerase TMX3                                                                  | Q96IJ7 | TMX3     | NA | Inverse variance weighted | 10 | 0.082  | 0.068 | 2.247E-01 | 0.957 | pan | Severe COVID-19 |
| 11152_46  | kallikrein 13              | Kallikrein-13                                                                                     | Q9UKR3 | KLK13    | NA | Inverse variance weighted | 4  | -0.220 | 0.182 | 2.253E-01 | 0.957 | pan | Severe COVID-19 |
| 15449_33  | TIM-4                      | T-cell immunoglobulin and mucin domain-containing protein 4                                       | Q96H15 | TIMD4    | NA | Inverse variance weighted | 19 | -0.080 | 0.066 | 2.261E-01 | 0.957 | pan | Severe COVID-19 |
| 6478_2    | IGLO5                      | IgLON family member 5                                                                             | ANGNG9 | IGLON5   | NA | Wald ratio                | 1  | 0.414  | 0.343 | 2.266E-01 | 0.957 | pan | Severe COVID-19 |
| 10672_75  | SP-B                       | Pulmonary surfactant-associated protein B                                                         | P07988 | SFTPB    | NA | Inverse variance weighted | 6  | 0.138  | 0.114 | 2.269E-01 | 0.957 | pan | Severe COVID-19 |
| 3592_4    | CAMK1                      | Calcium/calmodulin-dependent protein kinase type 1                                                | Q14012 | CAMK1    | NA | Inverse variance weighted | 11 | -0.074 | 0.062 | 2.278E-01 | 0.957 | pan | Severe COVID-19 |
| 15562_24  | BGLR                       | Beta-glucuronidase                                                                                | P08236 | GUSB     | NA | Inverse variance weighted | 13 | 0.061  | 0.051 | 2.280E-01 | 0.957 | pan | Severe COVID-19 |
| 9226_6    | TMUB2                      | Transmembrane and ubiquitin-like domain-containing protein 2                                      | Q71RG4 | TMUB2    | NA | Wald ratio                | 1  | -0.427 | 0.355 | 2.286E-01 | 0.957 | pan | Severe COVID-19 |
| 3029_52   | DC-SIGN                    | CD209 antigen                                                                                     | Q9NNX6 | CD209    | NA | Inverse variance weighted | 9  | 0.074  | 0.061 | 2.288E-01 | 0.957 | pan | Severe COVID-19 |
| 15321_8   | CPX2                       | Complexin-2                                                                                       | Q6PUV4 | CPX2     | NA | Wald ratio                | 1  | 0.394  | 0.328 | 2.298E-01 | 0.957 | pan | Severe COVID-19 |
| 11109_56  | SVPEP1:Sushi 15-18         | Sushi, von Willebrand factor type A, EGF and pentraxin domain-containing protein 1:Sushi 15-18    | Q4LDE5 | SVPE1    | NA | Inverse variance weighted | 8  | 0.111  | 0.092 | 2.301E-01 | 0.957 | pan | Severe COVID-19 |
| 4982_54   | Elafin                     | Elafin                                                                                            | P19957 | PI3      | NA | Inverse variance weighted | 8  | 0.089  | 0.074 | 2.304E-01 | 0.957 | pan | Severe COVID-19 |
| 12684_5   | ADSV                       | Adseverin                                                                                         | Q9YGJ3 | SCIN     | NA | Wald ratio                | 1  | 0.273  | 0.228 | 2.323E-01 | 0.957 | pan | Severe COVID-19 |
| 10702_1   | COSA1                      | Collagen alpha-1(XXVIII) chain                                                                    | Q2UVO9 | COL28A1  | NA | Inverse variance weighted | 2  | 0.291  | 0.244 | 2.329E-01 | 0.957 | pan | Severe COVID-19 |
| 13044_5   | TS101                      | Tumor susceptibility gene 101 protein                                                             | Q98H16 | TSG101   | NA | Inverse variance weighted | 2  | -0.184 | 0.154 | 2.331E-01 | 0.957 | pan | Severe COVID-19 |
| 2860_19   | Karyopherin-a2             | Importin subunit alpha-1                                                                          | P52292 | KPNA2    | NA | Inverse variance weighted | 10 | -0.114 | 0.096 | 2.334E-01 | 0.957 | pan | Severe COVID-19 |
| 10756_34  | UCN3                       | Urocortin-3                                                                                       | Q96953 | UCN3     | NA | Wald ratio                | 1  | -0.277 | 0.232 | 2.339E-01 | 0.957 | pan | Severe COVID-19 |
| 7952_2    | VTI1A                      | Vesicle transport through interaction with t-SNAREs homolog 1A                                    | Q96A19 | VTI1A    | NA | Wald ratio                | 1  | -0.331 | 0.279 | 2.347E-01 | 0.957 | pan | Severe COVID-19 |
| 17331_138 | KREM1                      | Kremen protein 1                                                                                  | Q96MU8 | KREMEN1  | NA | Inverse variance weighted | 4  | -0.103 | 0.087 | 2.348E-01 | 0.957 | pan | Severe COVID-19 |
| 9526_3    | COLL1                      | Colipase-like protein 1                                                                           | A2RUU4 | CLPSL1   | NA | Inverse variance weighted | 6  | 0.137  | 0.116 | 2.353E-01 | 0.957 | pan | Severe COVID-19 |
| 8458_111  | a-Synuclein                | Alpha-synuclein                                                                                   | P37840 | SNCA     | NA | Wald ratio                | 1  | 0.476  | 0.402 | 2.357E-01 | 0.957 | pan | Severe COVID-19 |
| 7154_92   | CFOS8                      | Protein LEG1 homolog                                                                              | Q6P552 | LEG1     | NA | Inverse variance weighted | 5  | 0.182  | 0.153 | 2.358E-01 | 0.957 | pan | Severe COVID-19 |
| 14273_19  | PPCE                       | Prolyl endopeptidase                                                                              | P48147 | PREP     | NA | Inverse variance weighted | 3  | -0.106 | 0.090 | 2.358E-01 | 0.957 | pan | Severe COVID-19 |
| 5400_52   | sLeptin R                  | Leptin receptor, soluble                                                                          | P48357 | LEPR     | NA | Inverse variance weighted | 18 | 0.034  | 0.029 | 2.360E-01 | 0.957 | pan | Severe COVID-19 |
| 19556_12  | Complement receptor type 1 | Complement receptor type 1                                                                        | P17927 | CR1      | NA | Inverse variance weighted | 11 | 0.062  | 0.052 | 2.367E-01 | 0.957 | pan | Severe COVID-19 |
| 19289_29  | DCUP                       | Uroporphyrinogen decarboxylase                                                                    | P06132 | UROD     | NA | Inverse variance weighted | 5  | 0.068  | 0.058 | 2.369E-01 | 0.957 | pan | Severe COVID-19 |
| 17792_158 | SSDH                       | Succinate-semialdehyde dehydrogenase, mitochondrial                                               | P51649 | ALDH5A1  | NA | Inverse variance weighted | 17 | -0.069 | 0.059 | 2.391E-01 | 0.957 | pan | Severe COVID-19 |
| 11140_56  | CO1A1:C-term propeptide    | Collagen alpha-1(I) chain:C-term propeptide                                                       | P02452 | COL1A1   | NA | Inverse variance weighted | 8  | -0.090 | 0.077 | 2.402E-01 | 0.957 | pan | Severe COVID-19 |
| 9015_1    | PRG3                       | Proteoglycan 3                                                                                    | Q9YZY8 | PRG3     | NA | Inverse variance weighted | 10 | 0.136  | 0.116 | 2.406E-01 | 0.957 | pan | Severe COVID-19 |
| 11239_49  | TMP56                      | Transmembrane protease serine 6                                                                   | Q8IU80 | TMPRSS6  | NA | Wald ratio                | 1  | -0.334 | 0.285 | 2.420E-01 | 0.957 | pan | Severe COVID-19 |
| 3046_31   | resistin                   | Resistin                                                                                          | Q9HD89 | RETN     | NA | Inverse variance weighted | 16 | -0.056 | 0.048 | 2.421E-01 | 0.957 | pan | Severe COVID-19 |
| 7551_33   | LRC32                      | Leucine-rich repeat-containing protein 32                                                         | Q14392 | LRCR32   | NA | Wald ratio                | 1  | 0.298  | 0.255 | 2.422E-01 | 0.957 | pan | Severe COVID-19 |
| 3198_4    | IDS                        | Iduronate 2-sulfatase                                                                             | P22304 | IDS      | NA | Wald ratio                | 1  | -0.272 | 0.233 | 2.426E-01 | 0.957 | pan | Severe COVID-19 |
| 5018_68   | Peroxioredoxin-6           | Peroxioredoxin-6                                                                                  | P30041 | PRDX6    | NA | Wald ratio                | 1  | 0.295  | 0.252 | 2.426E-01 | 0.957 | pan | Severe COVID-19 |
| 19238_12  | GLNA                       | Glutamine synthetase                                                                              | P15104 | GLUL     | NA | Inverse variance weighted | 2  | -0.291 | 0.249 | 2.426E-01 | 0.957 | pan | Severe COVID-19 |
| 14158_17  | Annexin V                  | Annexin A5                                                                                        | P08758 | ANXA5    | NA | Wald ratio                | 1  | 0.129  | 0.111 | 2.426E-01 | 0.957 | pan | Severe COVID-19 |
| 2611_72   | Dtk                        | Tyrosine-protein kinase receptor TYRO3                                                            | Q06418 | TYRO3    | NA | Inverse variance weighted | 2  | 0.170  | 0.145 | 2.433E-01 | 0.957 | pan | Severe COVID-19 |
| 11352_42  | TITIN                      | Titin                                                                                             | Q8WZ42 | TTN      | NA | Wald ratio                | 1  | 0.392  | 0.337 | 2.443E-01 | 0.957 | pan | Severe COVID-19 |
| 13969_24  | IMA7                       | Importin subunit alpha-7                                                                          | O60684 | KPNA6    | NA | Wald ratio                | 1  | 0.302  | 0.260 | 2.443E-01 | 0.957 | pan | Severe COVID-19 |
| 9738_7    | FAF2                       | FAS-associated factor 2                                                                           | Q96CS3 | FAF2     | NA | Wald ratio                | 1  | -0.665 | 0.572 | 2.449E-01 | 0.957 | pan | Severe COVID-19 |
| 13126_52  | DSCE                       | Desmocollin-2                                                                                     | Q02487 | DSC2     | NA | Inverse variance weighted | 3  | -0.096 | 0.083 | 2.450E-01 | 0.957 | pan | Severe COVID-19 |
| 11333_82  | RHG25                      | Rho GTPase-activating protein 25                                                                  | P42331 | ARHGAP25 | NA | Wald ratio                | 1  | 0.119  | 0.103 | 2.455E-01 | 0.957 | pan | Severe COVID-19 |
| 14106_46  | GDP/GTP exchange protein   | Rap1 GTPase-GDP dissociation stimulator 1                                                         | P52306 | RAP1GDS1 | NA | Wald ratio                | 1  | 0.347  | 0.299 | 2.457E-01 | 0.957 | pan | Severe COVID-19 |
| 4721_54   | TFF3                       | Trefoil factor 3                                                                                  | Q07654 | TFF3     | NA | Inverse variance weighted | 3  | -0.181 | 0.156 | 2.472E-01 | 0.957 | pan | Severe COVID-19 |
| 6620_82   | LIG01                      | Leucine-rich repeat and immunoglobulin-like domain-containing nogo receptor-interacting protein 1 | Q96FE5 | LING01   | NA | Inverse variance weighted | 3  | 0.278  | 0.240 | 2.475E-01 | 0.957 | pan | Severe COVID-19 |
| 13614_6   | CREB-binding protein       | CREB-binding protein                                                                              | Q92793 | CREBBP   | NA | Inverse variance weighted | 3  | 0.323  | 0.279 | 2.476E-01 | 0.957 | pan | Severe COVID-19 |

|           |                                   |                                                                             |        |           |    |                           |    |        |       |           |       |     |                 |
|-----------|-----------------------------------|-----------------------------------------------------------------------------|--------|-----------|----|---------------------------|----|--------|-------|-----------|-------|-----|-----------------|
| 9002_36   | SPA11                             | Serpin A11                                                                  | Q86U17 | SERPINA11 | NA | Inverse variance weighted | 7  | -0.119 | 0.103 | 2.479E-01 | 0.957 | pan | Severe COVID-19 |
| 9377_25   | SCF                               | Kit ligand                                                                  | P21583 | KITLG     | NA | Inverse variance weighted | 3  | 0.195  | 0.169 | 2.487E-01 | 0.957 | pan | Severe COVID-19 |
| 8065_245  | PATE4                             | Prostate and testis expressed protein 4                                     | POC8F1 | PATE4     | NA | Wald ratio                | 1  | -0.140 | 0.122 | 2.492E-01 | 0.957 | pan | Severe COVID-19 |
| 3449_58   | Kallistatin                       | Kallistatin                                                                 | P29622 | SERPINA4  | NA | Inverse variance weighted | 7  | 0.100  | 0.087 | 2.494E-01 | 0.957 | pan | Severe COVID-19 |
| 2982_82   | Galectin-4                        | Galectin-4                                                                  | P56470 | LGALS4    | NA | Wald ratio                | 1  | -0.312 | 0.271 | 2.495E-01 | 0.957 | pan | Severe COVID-19 |
| 15686_49  | INHBC                             | Inhibin beta C chain                                                        | P55103 | INHBC     | NA | Inverse variance weighted | 17 | 0.036  | 0.031 | 2.495E-01 | 0.957 | pan | Severe COVID-19 |
| 11388_75  | HE4                               | WAP four-disulfide core domain protein 2                                    | Q14508 | WDFC2     | NA | Wald ratio                | 1  | -0.314 | 0.274 | 2.511E-01 | 0.957 | pan | Severe COVID-19 |
| 4922_13   | MIP-3b                            | C-C motif chemokine 19                                                      | Q99731 | CCL19     | NA | Inverse variance weighted | 2  | 0.303  | 0.264 | 2.512E-01 | 0.957 | pan | Severe COVID-19 |
| 11643_73  | DTX3L                             | E3 ubiquitin-protein ligase DTX3L                                           | Q8TD86 | DTX3L     | NA | Wald ratio                | 1  | -0.401 | 0.349 | 2.517E-01 | 0.957 | pan | Severe COVID-19 |
| 2742_68   | Siglec-7                          | Sialic acid-binding Ig-like lectin 7                                        | Q9Y286 | SIGLEC7   | NA | Inverse variance weighted | 3  | 0.122  | 0.107 | 2.519E-01 | 0.957 | pan | Severe COVID-19 |
| 8300_82   | PEX14-N-term                      | Peroxisomal membrane protein PEX14-N-term                                   | Q75381 | PEX14     | NA | Inverse variance weighted | 2  | -0.280 | 0.245 | 2.527E-01 | 0.957 | pan | Severe COVID-19 |
| 3168_8    | ADAMTS-5                          | A disintegrin and metalloproteinase with thrombospondin motifs 5            | Q9UNA0 | ADAMTS5   | NA | Inverse variance weighted | 4  | 0.048  | 0.042 | 2.542E-01 | 0.957 | pan | Severe COVID-19 |
| 6626_81   | CHSTC                             | Carbohydrate sulfotransferase 12                                            | Q9NR83 | CHST12    | NA | Inverse variance weighted | 2  | -0.093 | 0.081 | 2.544E-01 | 0.957 | pan | Severe COVID-19 |
| 10940_25  | SRCA                              | Sarcalumenin                                                                | Q86TD4 | SRL       | NA | Inverse variance weighted | 3  | 0.080  | 0.070 | 2.544E-01 | 0.957 | pan | Severe COVID-19 |
| 11543_84  | LIMA1                             | LIM domain and actin-binding protein 1                                      | Q9UH86 | LIMA1     | NA | Wald ratio                | 1  | 0.267  | 0.235 | 2.552E-01 | 0.957 | pan | Severe COVID-19 |
| 12895_28  | DGKB                              | Diacylglycerol kinase beta                                                  | Q9Y677 | DGKB      | NA | Wald ratio                | 1  | 0.295  | 0.260 | 2.565E-01 | 0.957 | pan | Severe COVID-19 |
| 15580_2   | EPHA7                             | Ephrin type-A receptor 7                                                    | Q15375 | EPHA7     | NA | Wald ratio                | 1  | -0.060 | 0.053 | 2.571E-01 | 0.957 | pan | Severe COVID-19 |
| 19561_216 | PLXD1                             | Plexin-D1                                                                   | Q9Y4D7 | PLXND1    | NA | Inverse variance weighted | 6  | 0.130  | 0.115 | 2.575E-01 | 0.957 | pan | Severe COVID-19 |
| 7244_16   | TM149                             | IGF-like family receptor 1                                                  | Q9H665 | IGFLR1    | NA | Inverse variance weighted | 7  | -0.035 | 0.031 | 2.579E-01 | 0.957 | pan | Severe COVID-19 |
| 17320_19  | ADPPT                             | L-aminoacidopate-semialdehyde dehydrogenase-phosphopantetheinyl transferase | Q9NRN7 | AASDHPPPT | NA | Wald ratio                | 1  | -0.392 | 0.347 | 2.579E-01 | 0.957 | pan | Severe COVID-19 |
| 7955_195  | ITI heavy chain H1                | Inter-alpha-trypsin inhibitor heavy chain H1                                | P19827 | ITI1      | NA | Inverse variance weighted | 3  | 0.231  | 0.204 | 2.588E-01 | 0.957 | pan | Severe COVID-19 |
| 15533_97  | Macrophage scavenger receptor:ECD | Macrophage scavenger receptor types I and II: Extracellular domain          | P21757 | MSR1      | NA | Inverse variance weighted | 7  | -0.108 | 0.096 | 2.588E-01 | 0.957 | pan | Severe COVID-19 |
| 13124_20  | ISLR2                             | Immunoglobulin superfamily containing leucine-rich repeat protein 2         | Q6UXK2 | ISLR2     | NA | Inverse variance weighted | 4  | -0.141 | 0.125 | 2.604E-01 | 0.957 | pan | Severe COVID-19 |
| 3807_1    | FGF23                             | Fibroblast growth factor 23                                                 | Q9GZV9 | FGF23     | NA | Wald ratio                | 1  | -0.328 | 0.292 | 2.606E-01 | 0.957 | pan | Severe COVID-19 |
| 3049_61   | Trypsin                           | Trypsin-1                                                                   | PO7477 | PRSS1     | NA | Inverse variance weighted | 4  | 0.393  | 0.350 | 2.608E-01 | 0.957 | pan | Severe COVID-19 |
| 5803_24   | C3d                               | Complement C3d fragment                                                     | P01024 | C3        | NA | Wald ratio                | 1  | 0.294  | 0.262 | 2.615E-01 | 0.957 | pan | Severe COVID-19 |
| 13132_14  | SEMSA                             | Semaphorin-5A                                                               | Q13591 | SEMSA5    | NA | Inverse variance weighted | 9  | -0.019 | 0.017 | 2.620E-01 | 0.957 | pan | Severe COVID-19 |
| 12682_5   | KAT3                              | Kynurenine--oxoglutarate transaminase 3                                     | Q6Y921 | KYAT3     | NA | Inverse variance weighted | 7  | -0.050 | 0.045 | 2.626E-01 | 0.957 | pan | Severe COVID-19 |
| 8804_39   | COKA1                             | Collagen alpha-1(OX) chain                                                  | Q9P218 | COL20A1   | NA | Wald ratio                | 1  | 0.241  | 0.215 | 2.627E-01 | 0.957 | pan | Severe COVID-19 |
| 3808_76   | FGFR-2                            | Fibroblast growth factor receptor 2                                         | P21802 | FGFR2     | NA | Wald ratio                | 1  | -0.311 | 0.278 | 2.630E-01 | 0.957 | pan | Severe COVID-19 |
| 3508_78   | MDC                               | C-C motif chemokine 22                                                      | O00626 | CCL22     | NA | Inverse variance weighted | 9  | -0.076 | 0.068 | 2.639E-01 | 0.957 | pan | Severe COVID-19 |
| 5238_26   | PIIE                              | Peptidyl-prolyl cis-trans isomerase E                                       | Q9UNP9 | PIIE      | NA | Inverse variance weighted | 3  | 0.076  | 0.068 | 2.641E-01 | 0.957 | pan | Severe COVID-19 |
| 17329_2   | BDH2                              | 3-hydroxybutyrate dehydrogenase type 2                                      | Q9BU71 | BDH2      | NA | Inverse variance weighted | 2  | 0.100  | 0.090 | 2.654E-01 | 0.957 | pan | Severe COVID-19 |
| 15511_37  | NPTXR                             | Neuronal pentraxin receptor                                                 | Q95502 | NPTXR     | NA | Inverse variance weighted | 10 | -0.040 | 0.036 | 2.664E-01 | 0.957 | pan | Severe COVID-19 |
| 11241_8   | ARLY                              | Argininosuccinate lyase                                                     | P04424 | ASL       | NA | Inverse variance weighted | 7  | -0.152 | 0.137 | 2.666E-01 | 0.957 | pan | Severe COVID-19 |
| 18897_31  | HDAC2                             | Histone deacetylase 2                                                       | Q92769 | HDAC2     | NA | Wald ratio                | 1  | -0.458 | 0.412 | 2.672E-01 | 0.957 | pan | Severe COVID-19 |
| 4978_54   | DBNL                              | Drebrin-like protein                                                        | Q9UJU6 | DBNL      | NA | Wald ratio                | 1  | 0.264  | 0.238 | 2.672E-01 | 0.957 | pan | Severe COVID-19 |
| 17766_5   | NCF-1                             | Neutrophil cytosol factor 1                                                 | P14598 | NCF1      | NA | Inverse variance weighted | 8  | 0.067  | 0.060 | 2.673E-01 | 0.957 | pan | Severe COVID-19 |
| 15678_71  | DKK2                              | Dickkopf-related protein 2                                                  | Q9UBU2 | DKK2      | NA | Inverse variance weighted | 2  | -0.425 | 0.383 | 2.673E-01 | 0.957 | pan | Severe COVID-19 |
| 5691_2    | CRLD2                             | Cysteine-rich secretory protein LCCL domain-containing 2                    | Q9H088 | CRISPLD2  | NA | Inverse variance weighted | 10 | 0.073  | 0.066 | 2.675E-01 | 0.957 | pan | Severe COVID-19 |
| 5481_16   | RASA1                             | Ras GTPase-activating protein 1                                             | P20936 | RASA1     | NA | Inverse variance weighted | 2  | -0.376 | 0.339 | 2.677E-01 | 0.957 | pan | Severe COVID-19 |
| 17357_33  | SPCS                              | O-phosphoseryl-tRNA(Sec) selenin transferase                                | Q9HD40 | SESPSCS   | NA | Wald ratio                | 1  | -0.237 | 0.214 | 2.680E-01 | 0.957 | pan | Severe COVID-19 |
| 17408_2   | PMM1                              | Phosphomannomutase 1                                                        | Q92871 | PMM1      | NA | Wald ratio                | 1  | 0.320  | 0.290 | 2.692E-01 | 0.957 | pan | Severe COVID-19 |
| 8888_33   | CXO68                             | Small integral membrane protein 9                                           | A6NG28 | SMIM9     | NA | Inverse variance weighted | 2  | 0.085  | 0.077 | 2.696E-01 | 0.957 | pan | Severe COVID-19 |
| 6525_17   | DUSP13                            | Dual specificity protein phosphatase 13 isoform A                           | Q68811 | DUSP13    | NA | Inverse variance weighted | 3  | 0.099  | 0.090 | 2.698E-01 | 0.957 | pan | Severe COVID-19 |
| 9231_23   | IMPA3                             | Inositol monophosphatase 3                                                  | Q9NX62 | BPNT2     | NA | Inverse variance weighted | 12 | -0.041 | 0.037 | 2.702E-01 | 0.957 | pan | Severe COVID-19 |
| 3280_49   | Aggrecan                          | Aggrecan core protein                                                       | P16112 | ACAN      | NA | Inverse variance weighted | 3  | -0.116 | 0.105 | 2.703E-01 | 0.957 | pan | Severe COVID-19 |
| 9294_45   | MFAP2                             | Microfibrillar-associated protein 2                                         | P55001 | MFAP2     | NA | Inverse variance weighted | 2  | 0.269  | 0.244 | 2.704E-01 | 0.957 | pan | Severe COVID-19 |
| 8427_118  | RSP03                             | R-spondin-3                                                                 | Q9BX44 | RSP03     | NA | Inverse variance weighted | 4  | -0.246 | 0.224 | 2.716E-01 | 0.957 | pan | Severe COVID-19 |
| 13943_38  | DPY30                             | Protein dpy-30 homolog                                                      | Q8C005 | DPY30     | NA | Inverse variance weighted | 2  | -0.378 | 0.345 | 2.723E-01 | 0.957 | pan | Severe COVID-19 |
| 9870_17   | SYWC                              | Tryptophan--tRNA ligase, cytoplasmic                                        | P23381 | WAR51     | NA | Inverse variance weighted | 2  | -0.084 | 0.076 | 2.731E-01 | 0.957 | pan | Severe COVID-19 |
| 7009_8    | CD72                              | B-cell differentiation antigen CD72                                         | P21854 | CD72      | NA | Inverse variance weighted | 3  | 0.240  | 0.219 | 2.737E-01 | 0.957 | pan | Severe COVID-19 |
| 19237_17  | D-dopachrome decarboxylase        | D-dopachrome decarboxylase                                                  | P30046 | DDT       | NA | Inverse variance weighted | 9  | -0.107 | 0.098 | 2.740E-01 | 0.957 | pan | Severe COVID-19 |
| 16583_8   | AP4A                              | Bis(5'-nucleosyl)-tetraphosphatase [asymmetrical]                           | P50583 | NUDT2     | NA | Inverse variance weighted | 8  | 0.085  | 0.078 | 2.744E-01 | 0.957 | pan | Severe COVID-19 |
| 17383_4   | STAR5                             | STAR-related lipid transfer protein 5                                       | Q9NSY2 | STARDS5   | NA | Inverse variance weighted | 6  | -0.141 | 0.129 | 2.748E-01 | 0.957 | pan | Severe COVID-19 |
| 12612_37  | PSB1                              | Proteasome subunit beta type-1                                              | P20618 | PSMB1     | NA | Inverse variance weighted | 3  | 0.051  | 0.047 | 2.752E-01 | 0.957 | pan | Severe COVID-19 |
| 18188_12  | GATM                              | Glycine amidinotransferase, mitochondrial                                   | P50440 | GATM      | NA | Wald ratio                | 1  | -0.096 | 0.088 | 2.755E-01 | 0.957 | pan | Severe COVID-19 |
| 5459_33   | CYTN                              | Cystatin-SN                                                                 | P01037 | CST1      | NA | Inverse variance weighted | 6  | 0.126  | 0.116 | 2.756E-01 | 0.957 | pan | Severe COVID-19 |
| 5452_71   | ASGR1                             | Asialoglycoprotein receptor 1                                               | PO7306 | ASGR1     | NA | Wald ratio                | 1  | 0.381  | 0.350 | 2.761E-01 | 0.957 | pan | Severe COVID-19 |
| 18895_54  | GSTM4                             | Glutathione S-transferase Mu 4                                              | Q03013 | GSTM4     | NA | Inverse variance weighted | 10 | 0.078  | 0.072 | 2.765E-01 | 0.957 | pan | Severe COVID-19 |
| 19379_154 | RAB3D                             | Ras-related protein Rab-3D                                                  | Q95716 | RAB3D     | NA | Wald ratio                | 1  | 0.286  | 0.262 | 2.766E-01 | 0.957 | pan | Severe COVID-19 |
| 3719_2    | p27Kip1                           | Cyclin-dependent kinase inhibitor 1B                                        | P46527 | CDKN1B    | NA | Inverse variance weighted | 2  | 0.204  | 0.187 | 2.766E-01 | 0.957 | pan | Severe COVID-19 |
| 9212_22   | CATF                              | Cathepsin F                                                                 | Q9UBX1 | CTSF      | NA | Inverse variance weighted | 3  | 0.229  | 0.211 | 2.769E-01 | 0.957 | pan | Severe COVID-19 |
| 8097_77   | LIPN                              | Lipase member N                                                             | Q5VX19 | LIPN      | NA | Inverse variance weighted | 14 | -0.055 | 0.050 | 2.776E-01 | 0.957 | pan | Severe COVID-19 |
| 4874_3    | Angiogenin                        | Angiogenin                                                                  | PO3950 | ANG       | NA | Inverse variance weighted | 6  | 0.106  | 0.097 | 2.780E-01 | 0.957 | pan | Severe COVID-19 |
| 5392_73   | Fas, soluble                      | Tumor necrosis factor receptor superfamily member 6                         | P25445 | FAS       | NA | Inverse variance weighted | 3  | 0.221  | 0.204 | 2.781E-01 | 0.957 | pan | Severe COVID-19 |
| 10531_18  | RASN                              | GTPase NRas                                                                 | PO1111 | NRAS      | NA | Wald ratio                | 1  | -0.426 | 0.393 | 2.781E-01 | 0.957 | pan | Severe COVID-19 |
| 12350_86  | ETS2                              | Protein C-ets-2                                                             | P15036 | ETS2      | NA | Inverse variance weighted | 6  | 0.120  | 0.110 | 2.783E-01 | 0.957 | pan | Severe COVID-19 |
| 12993_21  | NPL4                              | Nuclear protein localization protein 4 homolog                              | Q8TAT6 | NPLOC4    | NA | Wald ratio                | 1  | -0.624 | 0.576 | 2.784E-01 | 0.957 | pan | Severe COVID-19 |
| 7019_13   | Semaphorin-7A                     | Semaphorin-7A                                                               | Q75326 | SEMA7A    | NA | Inverse variance weighted | 2  | 0.279  | 0.258 | 2.800E-01 | 0.957 | pan | Severe COVID-19 |
| 18295_102 | GRHPR                             | Glyoxylate reductase/hydroxypyruvate reductase                              | Q9UBQ7 | GRHPR     | NA | Inverse variance weighted | 3  | -0.058 | 0.054 | 2.806E-01 | 0.957 | pan | Severe COVID-19 |
| 9296_15   | PTPRD                             | Receptor-type tyrosine-protein phosphatase delta                            | P23468 | PTPRD     | NA | Wald ratio                | 1  | 0.351  | 0.326 | 2.816E-01 | 0.957 | pan | Severe COVID-19 |
| 18381_16  | ALDH-E2                           | Aldehyde dehydrogenase, mitochondrial                                       | PO5091 | ALDH2     | NA | Inverse variance weighted | 4  | 0.121  | 0.112 | 2.816E-01 | 0.957 | pan | Severe COVID-19 |
| 17672_184 | Gastric intrinsic factor          | Gastric intrinsic factor                                                    | P27352 | CBLIF     | NA | Inverse variance weighted | 13 | -0.046 | 0.043 | 2.816E-01 | 0.957 | pan | Severe COVID-19 |
| 8893_29   | PARP:region 1                     | Poly [ADP-ribose] polymerase 1:region 1                                     | P09874 | PARP1     | NA | Wald ratio                | 1  | 0.320  | 0.298 | 2.829E-01 | 0.957 | pan | Severe COVID-19 |
| 12498_12  | TX1B3                             | Tax1-binding protein 3                                                      | Q14907 | TAX1BP3   | NA | Wald ratio                | 1  | 0.179  | 0.167 | 2.830E-01 | 0.957 | pan | Severe COVID-19 |
| 6998_106  | HAAH                              | Aspartyl/asparaginyl beta-hydroxylase                                       | Q12797 | ASPH      | NA | Inverse variance weighted | 3  | -0.168 | 0.157 | 2.833E-01 | 0.957 | pan | Severe COVID-19 |
| 12396_19  | HIBCH                             | 3-hydroxyisobutyryl-CoA hydrolase, mitochondrial                            | Q6NVY1 | HIBCH     | NA | Inverse variance weighted | 6  | 0.045  | 0.042 | 2.836E-01 | 0.957 | pan | Severe COVID-19 |

|           |                                 |                                                                        |        |          |    |                           |    |        |       |           |       |     |                 |
|-----------|---------------------------------|------------------------------------------------------------------------|--------|----------|----|---------------------------|----|--------|-------|-----------|-------|-----|-----------------|
| 14008_22  | DCP1A                           | mRNA-decapping enzyme 1A                                               | Q9NPi6 | DCP1A    | NA | Inverse variance weighted | 3  | -0.091 | 0.085 | 2.838E-01 | 0.957 | pan | Severe COVID-19 |
| 17332_3   | ARHL2                           | Poly(ADP-ribose) glycohydrolase ARH3                                   | Q9NX46 | ADPR5    | NA | Inverse variance weighted | 5  | -0.080 | 0.075 | 2.846E-01 | 0.957 | pan | Severe COVID-19 |
| 5601_2    | PGRP-L                          | N-acetylmuramoyl-L-alanine amidase                                     | Q96PD5 | PGLYRP2  | NA | Inverse variance weighted | 6  | 0.081  | 0.076 | 2.856E-01 | 0.957 | pan | Severe COVID-19 |
| 12475_48  | CLIC5                           | Chloride intracellular channel protein 5                               | Q9NZA1 | CLIC5    | NA | Inverse variance weighted | 9  | 0.053  | 0.049 | 2.857E-01 | 0.957 | pan | Severe COVID-19 |
| 13947_371 | NUD12                           | Peroxisomal NADH pyrophosphatase NUDT12                                | Q9BQG2 | NUDT12   | NA | Inverse variance weighted | 5  | 0.045  | 0.042 | 2.870E-01 | 0.957 | pan | Severe COVID-19 |
| 17495_141 | SIR3                            | NAD-dependent protein deacetylase siruin-3, mitochondrial              | Q9NTG7 | SIRT3    | NA | Inverse variance weighted | 3  | -0.139 | 0.130 | 2.871E-01 | 0.957 | pan | Severe COVID-19 |
| 5963_9    | Dermokine                       |                                                                        | Q6E0U4 | DMKN     | NA | Wald ratio                | 1  | -0.363 | 0.341 | 2.873E-01 | 0.957 | pan | Severe COVID-19 |
| 7738_299  | STX2                            | Syntaxin-2                                                             | P32856 | STX2     | NA | Inverse variance weighted | 3  | 0.242  | 0.228 | 2.878E-01 | 0.957 | pan | Severe COVID-19 |
| 5090_49   | ILT-2                           | Leukocyte immunoglobulin-like receptor subfamily B member 1            | Q8NHL6 | LILRB1   | NA | Inverse variance weighted | 9  | -0.090 | 0.085 | 2.884E-01 | 0.957 | pan | Severe COVID-19 |
| 16858_384 | RCN3                            | Reticulocalbin-3                                                       | Q96D15 | RCN3     | NA | Inverse variance weighted | 2  | -0.271 | 0.255 | 2.886E-01 | 0.957 | pan | Severe COVID-19 |
| 5680_54   | OBP2B                           | Odorant-binding protein 2b                                             | Q9NPH6 | OBP2B    | NA | Inverse variance weighted | 6  | 0.048  | 0.046 | 2.887E-01 | 0.957 | pan | Severe COVID-19 |
| 8325_37   | ADH4                            | Alcohol dehydrogenase 4                                                | P08319 | ADH4     | NA | Wald ratio                | 1  | 0.217  | 0.205 | 2.888E-01 | 0.957 | pan | Severe COVID-19 |
| 3221_54   | SARP-2                          | Secreted frizzled-related protein 1                                    | Q8N474 | SFRP1    | NA | Inverse variance weighted | 6  | 0.082  | 0.077 | 2.890E-01 | 0.957 | pan | Severe COVID-19 |
| 15470_11  | Hexosaminidase B                | Beta-hexosaminidase subunit beta                                       | P07686 | HEXB     | NA | Inverse variance weighted | 12 | 0.055  | 0.052 | 2.893E-01 | 0.957 | pan | Severe COVID-19 |
| 19376_74  | NNMT                            | Nicotinamide N-methyltransferase                                       | P40261 | NNMT     | NA | Wald ratio                | 1  | 0.262  | 0.247 | 2.896E-01 | 0.957 | pan | Severe COVID-19 |
| 13481_24  | TCEA2                           | Transcription elongation factor A protein 2                            | Q15560 | TCEA2    | NA | Wald ratio                | 1  | -0.170 | 0.162 | 2.926E-01 | 0.957 | pan | Severe COVID-19 |
| 3026_5    | Calpastatin                     | Calpastatin                                                            | P20810 | CAST     | NA | Inverse variance weighted | 4  | -0.163 | 0.155 | 2.927E-01 | 0.957 | pan | Severe COVID-19 |
| 12817_1   | GEM                             | GTP-binding protein GEM                                                | P55040 | GEM      | NA | Wald ratio                | 1  | 0.569  | 0.542 | 2.939E-01 | 0.957 | pan | Severe COVID-19 |
| 13068_139 | CCS                             | Copper chaperone for superoxide dismutase                              | Q14618 | CCS      | NA | Wald ratio                | 1  | 0.200  | 0.191 | 2.942E-01 | 0.957 | pan | Severe COVID-19 |
| 8000_17   | KI2LA                           | Killer cell immunoglobulin-like receptor 2DL5A                         | Q8N109 | KIR2DL5A | NA | Inverse variance weighted | 8  | 0.060  | 0.057 | 2.943E-01 | 0.957 | pan | Severe COVID-19 |
| 15515_2   | SAA                             | Serum amyloid A-1 protein                                              | P0D1I8 | SAA1     | NA | Inverse variance weighted | 5  | -0.119 | 0.113 | 2.955E-01 | 0.957 | pan | Severe COVID-19 |
| 3314_74   | GFRa-1                          | GNDF family receptor alpha-1                                           | P56159 | GFRa1    | NA | Inverse variance weighted | 3  | 0.082  | 0.078 | 2.956E-01 | 0.957 | pan | Severe COVID-19 |
| 8345_27   | GPX7                            | Glutathione peroxidase 7                                               | Q96SL4 | GPX7     | NA | Inverse variance weighted | 8  | 0.035  | 0.033 | 2.966E-01 | 0.957 | pan | Severe COVID-19 |
| 17812_2   | TP4A1                           | Protein tyrosine phosphatase type IVA 1                                | Q93096 | PTP4A1   | NA | Wald ratio                | 1  | -0.353 | 0.339 | 2.968E-01 | 0.957 | pan | Severe COVID-19 |
| 19273_3   | Glutathione reductase           | Glutathione reductase, mitochondrial                                   | P00390 | GSR      | NA | Inverse variance weighted | 3  | 0.092  | 0.088 | 2.976E-01 | 0.957 | pan | Severe COVID-19 |
| 19170_25  | DPOE3                           | DNA polymerase epsilon subunit 3                                       | Q9NRF9 | POLE3    | NA | Wald ratio                | 1  | 0.170  | 0.164 | 2.989E-01 | 0.957 | pan | Severe COVID-19 |
| 3191_50   | WFKN1                           | WAP, kazal, immunoglobulin, kunitz and NTR domain-containing protein 1 | Q96N28 | WF1KN1   | NA | Inverse variance weighted | 2  | -0.149 | 0.143 | 2.995E-01 | 0.957 | pan | Severe COVID-19 |
| 5879_51   | Dynactin subunit 2              | Dynactin subunit 2                                                     | Q13561 | DCTN2    | NA | Wald ratio                | 1  | -0.300 | 0.290 | 3.001E-01 | 0.957 | pan | Severe COVID-19 |
| 4878_3    | Coagulation Factor X            | Coagulation Factor X                                                   | P00742 | F10      | NA | Wald ratio                | 1  | 0.351  | 0.340 | 3.008E-01 | 0.957 | pan | Severe COVID-19 |
| 7049_2    | ADAM 23                         | Disintegrin and metalloproteinase domain-containing protein 23         | O75077 | ADAM23   | NA | Inverse variance weighted | 13 | -0.033 | 0.031 | 3.008E-01 | 0.957 | pan | Severe COVID-19 |
| 13578_98  | ABLM3                           | Actin-binding LIM protein 3                                            | O94929 | ABLM3    | NA | Wald ratio                | 1  | -0.149 | 0.144 | 3.010E-01 | 0.957 | pan | Severe COVID-19 |
| 7861_9    | ROR2                            | Tyrosine-protein kinase transmembrane receptor ROR2                    | Q01974 | ROR2     | NA | Inverse variance weighted | 3  | -0.093 | 0.090 | 3.012E-01 | 0.957 | pan | Severe COVID-19 |
| 5648_28   | CTR82                           | Chymotrypsinogen B2                                                    | Q6GP11 | CTR82    | NA | Inverse variance weighted | 11 | 0.035  | 0.034 | 3.012E-01 | 0.957 | pan | Severe COVID-19 |
| 16809_1   | NDKM                            | Nucleoside diphosphate kinase, mitochondrial                           | O00746 | NME4     | NA | Wald ratio                | 1  | 0.214  | 0.208 | 3.016E-01 | 0.957 | pan | Severe COVID-19 |
| 13632_10  | Zyxin                           | Zyxin                                                                  | Q15942 | ZYX      | NA | Wald ratio                | 1  | -0.415 | 0.402 | 3.024E-01 | 0.957 | pan | Severe COVID-19 |
| 5029_3    | SEPR                            | Prolyl endopeptidase FAP                                               | Q12884 | FAP      | NA | Inverse variance weighted | 6  | -0.085 | 0.083 | 3.026E-01 | 0.957 | pan | Severe COVID-19 |
| 3194_36   | GPVI                            | Platelet glycoprotein VI                                               | Q9HCN6 | GP6      | NA | Inverse variance weighted | 2  | -0.113 | 0.110 | 3.031E-01 | 0.957 | pan | Severe COVID-19 |
| 2750_3    | Apo A-I                         | Apolipoprotein A-I                                                     | P02647 | AP0A1    | NA | Inverse variance weighted | 8  | -0.066 | 0.064 | 3.033E-01 | 0.957 | pan | Severe COVID-19 |
| 5121_3    | SEM6B                           | Semaphorin-6B                                                          | Q9H3T3 | SEMA6B   | NA | Inverse variance weighted | 2  | 0.195  | 0.190 | 3.036E-01 | 0.957 | pan | Severe COVID-19 |
| 5765_53   | DB121                           | Beta-defensin 121                                                      | Q5J5C9 | DEFB121  | NA | Wald ratio                | 1  | 0.507  | 0.493 | 3.036E-01 | 0.957 | pan | Severe COVID-19 |
| 15466_30  | CO9A1                           | Collagen alpha-1(X) chain                                              | P20849 | COL9A1   | NA | Inverse variance weighted | 3  | 0.143  | 0.139 | 3.040E-01 | 0.957 | pan | Severe COVID-19 |
| 14260_112 | ARHG8                           | Neuroepithelial cell-transforming gene 1 protein                       | Q72628 | NET1     | NA | Inverse variance weighted | 3  | 0.263  | 0.256 | 3.058E-01 | 0.957 | pan | Severe COVID-19 |
| 9185_15   | TFF1                            | Trefoil factor 1                                                       | P04155 | TFF1     | NA | Inverse variance weighted | 8  | 0.051  | 0.050 | 3.059E-01 | 0.957 | pan | Severe COVID-19 |
| 6223_5    | GUC2B                           | Guanylate cyclase activator 2B                                         | Q16661 | GUCAC2B  | NA | Inverse variance weighted | 5  | -0.178 | 0.174 | 3.066E-01 | 0.957 | pan | Severe COVID-19 |
| 6408_2    | INH8C                           | Inhibin beta C chain                                                   | P55103 | INH8C    | NA | Inverse variance weighted | 4  | 0.080  | 0.078 | 3.067E-01 | 0.957 | pan | Severe COVID-19 |
| 3042_7    | Myoglobin                       | Myoglobin                                                              | P02144 | MB       | NA | Inverse variance weighted | 2  | 0.357  | 0.349 | 3.072E-01 | 0.957 | pan | Severe COVID-19 |
| 15544_25  | kallikrein 14                   | Kallikrein-14                                                          | Q9POG3 | KLK14    | NA | Inverse variance weighted | 5  | -0.142 | 0.139 | 3.072E-01 | 0.957 | pan | Severe COVID-19 |
| 6451_64   | ASPn                            | Asporin                                                                | Q9BXN1 | ASPn     | NA | Inverse variance weighted | 8  | 0.104  | 0.102 | 3.073E-01 | 0.957 | pan | Severe COVID-19 |
| 4125_52   | sRAGE                           | Advanced glycosylation end product-specific receptor, soluble          | Q15109 | AGER     | NA | Inverse variance weighted | 46 | -0.045 | 0.044 | 3.074E-01 | 0.957 | pan | Severe COVID-19 |
| 9204_33   | Corticotropin-lipotropin        | Pro-opiomelanocortin                                                   | P01189 | POMC     | NA | Inverse variance weighted | 11 | -0.065 | 0.064 | 3.079E-01 | 0.957 | pan | Severe COVID-19 |
| 13105_7   | SNP25                           | Synaptosomal-associated protein 25                                     | P60880 | SNAP25   | NA | Wald ratio                | 1  | 0.322  | 0.316 | 3.084E-01 | 0.957 | pan | Severe COVID-19 |
| 15558_63  | AMPE                            | Glutamyl aminopeptidase                                                | Q07075 | ENPEP    | NA | Inverse variance weighted | 8  | 0.042  | 0.042 | 3.086E-01 | 0.957 | pan | Severe COVID-19 |
| 15472_16  | LRP11                           | Low-density lipoprotein receptor-related protein 11                    | Q86V24 | LRP11    | NA | Inverse variance weighted | 8  | -0.075 | 0.074 | 3.093E-01 | 0.957 | pan | Severe COVID-19 |
| 3206_4    | LYVE1                           | Lymphatic vessel endothelial hyaluronin acid receptor 1                | Q9YSY7 | LYVE1    | NA | Inverse variance weighted | 21 | 0.065  | 0.064 | 3.095E-01 | 0.957 | pan | Severe COVID-19 |
| 9386_42   | TTC9B                           | Tetrapeptide repeat protein 9B                                         | Q8N6N2 | TTC9B    | NA | Inverse variance weighted | 2  | 0.126  | 0.124 | 3.097E-01 | 0.957 | pan | Severe COVID-19 |
| 19560_23  | PLXA4                           | Plexin-A4                                                              | Q9HCM2 | PLXNA4   | NA | Wald ratio                | 1  | -0.190 | 0.187 | 3.097E-01 | 0.957 | pan | Severe COVID-19 |
| 11347_9   | Transaldolase                   | Transaldolase                                                          | P37837 | TALDO1   | NA | Inverse variance weighted | 2  | -0.143 | 0.141 | 3.099E-01 | 0.957 | pan | Severe COVID-19 |
| 18922_27  | CD68                            | Macrosialin                                                            | P34810 | CD68     | NA | Inverse variance weighted | 4  | -0.144 | 0.142 | 3.099E-01 | 0.957 | pan | Severe COVID-19 |
| 9837_60   | NAD(P)H dehydrogenase           | NAD(P)H dehydrogenase [quinone] 1                                      | P15559 | NQO1     | NA | Inverse variance weighted | 12 | 0.036  | 0.035 | 3.101E-01 | 0.957 | pan | Severe COVID-19 |
| 2201_17   | Endostatin                      | Endostatin                                                             | P39060 | COL18A1  | NA | Inverse variance weighted | 4  | -0.089 | 0.088 | 3.106E-01 | 0.957 | pan | Severe COVID-19 |
| 2967_8    | VCAM-1                          | Vascular cell adhesion protein 1                                       | P19320 | VCAM1    | NA | Inverse variance weighted | 3  | -0.194 | 0.191 | 3.106E-01 | 0.957 | pan | Severe COVID-19 |
| 15503_20  | Lefty-A                         | Left-right determination factor 2                                      | O00292 | LEFTY2   | NA | Inverse variance weighted | 12 | 0.037  | 0.037 | 3.106E-01 | 0.957 | pan | Severe COVID-19 |
| 5596_75   | CD5:ECD                         | T-cell surface glycoprotein CD5:Extracellular domain                   | P06127 | CD5      | NA | Inverse variance weighted | 17 | -0.084 | 0.083 | 3.107E-01 | 0.957 | pan | Severe COVID-19 |
| 11356_19  | DGCI14                          | Protein DGCR14                                                         | Q96Df8 | ESS2     | NA | Wald ratio                | 1  | 0.144  | 0.142 | 3.107E-01 | 0.957 | pan | Severe COVID-19 |
| 9826_135  | Fragile histidine triad protein | Bis(5'-adenosyl)-triphosphatase                                        | P49789 | FHIT     | NA | Inverse variance weighted | 3  | -0.184 | 0.181 | 3.108E-01 | 0.957 | pan | Severe COVID-19 |
| 2837_3    | Met                             | Hepatocyte growth factor receptor                                      | P08581 | MET      | NA | Inverse variance weighted | 7  | 0.077  | 0.076 | 3.109E-01 | 0.957 | pan | Severe COVID-19 |
| 5478_50   | PSMA                            | Glutamate carboxypeptidase 2                                           | Q04609 | FOLH1    | NA | Inverse variance weighted | 4  | -0.082 | 0.081 | 3.110E-01 | 0.957 | pan | Severe COVID-19 |
| 8877_22   | F176C:ECD                       | Protein eva-1 homolog C:Extracellular domain                           | P58658 | EVA1C    | NA | Wald ratio                | 1  | -0.243 | 0.241 | 3.117E-01 | 0.957 | pan | Severe COVID-19 |
| 9841_197  | Multifunctional protein ADE2    | Multifunctional protein ADE2                                           | P22234 | PAIC3    | NA | Wald ratio                | 1  | 0.178  | 0.176 | 3.120E-01 | 0.957 | pan | Severe COVID-19 |
| 6715_63   | PPBN                            | Alkaline phosphatase, placental-like                                   | P10696 | ALPG     | NA | Inverse variance weighted | 3  | 0.157  | 0.156 | 3.121E-01 | 0.957 | pan | Severe COVID-19 |
| 16322_10  | PACAP                           | Marginal zone B- and B1-cell-specific protein                          | Q8WU39 | MZB1     | NA | Inverse variance weighted | 10 | -0.076 | 0.075 | 3.130E-01 | 0.957 | pan | Severe COVID-19 |
| 4271_75   | PFDS                            | Prefoldin subunit 5                                                    | Q99471 | PFDM5    | NA | Wald ratio                | 1  | 0.568  | 0.564 | 3.135E-01 | 0.957 | pan | Severe COVID-19 |
| 3810_50   | FR                              | Tyrosine-protein kinase Fgr                                            | P09769 | FR       | NA | Inverse variance weighted | 2  | 0.135  | 0.134 | 3.144E-01 | 0.957 | pan | Severe COVID-19 |
| 3600_2    | Chitotriosidase-1               | Chitotriosidase-1                                                      | Q13231 | CHIT1    | NA | Inverse variance weighted | 8  | 0.029  | 0.029 | 3.148E-01 | 0.957 | pan | Severe COVID-19 |
| 11260_47  | SPA4L                           | SUN domain-containing protein 5                                        | Q8TC36 | SUN5     | NA | Inverse variance weighted | 4  | 0.097  | 0.097 | 3.152E-01 | 0.957 | pan | Severe COVID-19 |
| 13453_2   | RM33                            | 39S ribosomal protein L33, mitochondrial                               | Q75394 | MRPL33   | NA | Inverse variance weighted | 4  | -0.146 | 0.146 | 3.153E-01 | 0.957 | pan | Severe COVID-19 |
| 17724_3   | WWOX                            | WW domain-containing oxidoreductase                                    | Q9NZC7 | WWOX     | NA | Wald ratio                | 1  | 0.203  | 0.202 | 3.153E-01 | 0.957 | pan | Severe COVID-19 |
| 6039_24   | CRHBP                           | Corticotropin-releasing factor-binding protein                         | P24387 | CRHBP    | NA | Inverse variance weighted | 8  | 0.054  | 0.054 | 3.153E-01 | 0.957 | pan | Severe COVID-19 |

|           |                              |                                                                                    |        |           |    |                           |    |        |       |           |       |     |                 |
|-----------|------------------------------|------------------------------------------------------------------------------------|--------|-----------|----|---------------------------|----|--------|-------|-----------|-------|-----|-----------------|
| 7921_65   | FIX1                         | Four-jointed box protein 1                                                         | Q86VR8 | FIX1      | NA | Inverse variance weighted | 4  | 0.063  | 0.063 | 3.156E-01 | 0.957 | pan | Severe COVID-19 |
| 18173_11  | ARK73                        | Aflatoxin B1 aldehyde reductase member 3                                           | Q95154 | AKR7A3    | NA | Inverse variance weighted | 6  | 0.053  | 0.052 | 3.157E-01 | 0.957 | pan | Severe COVID-19 |
| 5682_13   | VASN                         | Vasorin                                                                            | Q6EMK4 | VASN      | NA | Inverse variance weighted | 2  | -0.164 | 0.163 | 3.158E-01 | 0.957 | pan | Severe COVID-19 |
| 13119_26  | protein Z inhibitor          | Protein Z-dependent protease inhibitor                                             | Q9UK55 | SERPINA10 | NA | Inverse variance weighted | 16 | 0.050  | 0.050 | 3.168E-01 | 0.957 | pan | Severe COVID-19 |
| 2692_74   | NPS-PLA2                     | Phospholipase A2, membrane associated                                              | P14555 | PLA2G2A   | NA | Inverse variance weighted | 7  | -0.028 | 0.028 | 3.175E-01 | 0.957 | pan | Severe COVID-19 |
| 10816_150 | PILRA isoform FDF03-M14      | Paired immunoglobulin-like type 2 receptor alpha isoform FDF03-M14                 | Q9UK11 | PILRA     | NA | Inverse variance weighted | 9  | -0.113 | 0.113 | 3.181E-01 | 0.957 | pan | Severe COVID-19 |
| 4771_10   | ASMA3A                       | Acid sphingomyelinase-like phosphodiesterase 3a                                    | Q92484 | SMPL0L3A  | NA | Inverse variance weighted | 3  | 0.065  | 0.065 | 3.186E-01 | 0.957 | pan | Severe COVID-19 |
| 9565_6    | PAWR                         | PRKC apoptosis WT1 regulator protein                                               | Q9G120 | PAWR      | NA | Wald ratio                | 1  | 0.332  | 0.333 | 3.187E-01 | 0.957 | pan | Severe COVID-19 |
| 10643_16  | NOE3:C-term                  | Noelin-3:Isoform 2, C-term                                                         | Q96P87 | OLFM3     | NA | Wald ratio                | 1  | -0.305 | 0.306 | 3.190E-01 | 0.957 | pan | Severe COVID-19 |
| 13993_20  | E41L1                        | Band 4.1-like protein 1                                                            | Q9H4G0 | EPB41L1   | NA | Inverse variance weighted | 2  | 0.257  | 0.258 | 3.192E-01 | 0.957 | pan | Severe COVID-19 |
| 18321_38  | MTDC                         | Bifunctional methylenetetrahydrofolate dehydrogenase/cyclohydrolase, mitochondrial | P13995 | MTHFD2    | NA | Inverse variance weighted | 4  | 0.097  | 0.097 | 3.198E-01 | 0.957 | pan | Severe COVID-19 |
| 7994_41   | ERO1B                        | ERO1-like protein beta                                                             | Q86YB8 | ERO1B     | NA | Inverse variance weighted | 2  | -0.082 | 0.082 | 3.199E-01 | 0.957 | pan | Severe COVID-19 |
| 8447_11   | ghrelin                      | Appetite-regulating hormone                                                        | Q9UBU3 | GHRL      | NA | Inverse variance weighted | 2  | -0.216 | 0.218 | 3.202E-01 | 0.957 | pan | Severe COVID-19 |
| 3171_57   | amyloid precursor protein    | Amyloid beta A4 protein                                                            | P05067 | APP       | NA | Inverse variance weighted | 2  | 0.177  | 0.178 | 3.218E-01 | 0.957 | pan | Severe COVID-19 |
| 2752_62   | BMP-14                       | Growth/differentiation factor 5                                                    | P43026 | GDF5      | NA | Inverse variance weighted | 2  | 0.164  | 0.166 | 3.224E-01 | 0.957 | pan | Severe COVID-19 |
| 9504_19   | RB27A                        | Ras-related protein Rab-27A                                                        | P51159 | RAB27A    | NA | Wald ratio                | 1  | -0.154 | 0.156 | 3.224E-01 | 0.957 | pan | Severe COVID-19 |
| 7215_18   | NADH-cytochrome b5 reductase | NADH-cytochrome b5 reductase 3                                                     | P00387 | CYB5R3    | NA | Inverse variance weighted | 2  | -0.394 | 0.399 | 3.236E-01 | 0.957 | pan | Severe COVID-19 |
| 18935_14  | TLR5                         | Toll-like receptor 5                                                               | O60602 | TLR5      | NA | Inverse variance weighted | 10 | -0.044 | 0.045 | 3.239E-01 | 0.957 | pan | Severe COVID-19 |
| 19334_62  | TXD12                        | Thioredoxin domain-containing protein 12                                           | O95881 | TXNDC12   | NA | Wald ratio                | 1  | 0.175  | 0.178 | 3.249E-01 | 0.957 | pan | Severe COVID-19 |
| 7871_16   | T132A                        | Transmembrane protein 132A                                                         | Q24IP5 | TMEM132A  | NA | Inverse variance weighted | 9  | 0.044  | 0.045 | 3.249E-01 | 0.957 | pan | Severe COVID-19 |
| 10613_33  | CASC4                        | Protein CASC4                                                                      | G6P4E1 | GOLM2     | NA | Inverse variance weighted | 6  | -0.128 | 0.130 | 3.253E-01 | 0.957 | pan | Severe COVID-19 |
| 6927_7    | NDST1                        | Bifunctional heparan sulfate N-deacetylase/N-sulfotransferase 1                    | P52848 | NDST1     | NA | Inverse variance weighted | 3  | 0.187  | 0.190 | 3.253E-01 | 0.957 | pan | Severe COVID-19 |
| 16773_29  | SCUB3                        | Signal peptide, CUB and EGF-like domain-containing protein 3                       | Q8IX30 | SCUBE3    | NA | Inverse variance weighted | 4  | 0.083  | 0.085 | 3.257E-01 | 0.957 | pan | Severe COVID-19 |
| 16916_19  | SLIK6                        | SLIT and NTRK-like protein 6                                                       | Q9H5Y7 | SLITRK6   | NA | Inverse variance weighted | 6  | -0.108 | 0.110 | 3.263E-01 | 0.957 | pan | Severe COVID-19 |
| 8369_102  | DAG1                         | Dystroglycan                                                                       | Q14118 | DAG1      | NA | Wald ratio                | 1  | -0.254 | 0.259 | 3.266E-01 | 0.957 | pan | Severe COVID-19 |
| 11616_9   | HSF1                         | Heat shock factor protein 1                                                        | Q00613 | HSF1      | NA | Wald ratio                | 1  | 0.329  | 0.336 | 3.268E-01 | 0.957 | pan | Severe COVID-19 |
| 3234_23   | URB                          | Coiled-coil domain-containing protein 80                                           | Q76M96 | CDC80     | NA | Inverse variance weighted | 4  | 0.136  | 0.139 | 3.268E-01 | 0.957 | pan | Severe COVID-19 |
| 12432_23  | CYBP                         | Calcylin-binding protein                                                           | Q9HB71 | CACYBP    | NA | Wald ratio                | 1  | -0.261 | 0.267 | 3.276E-01 | 0.957 | pan | Severe COVID-19 |
| 8597_1    | TMEM9:CD                     | Transmembrane protein 9:Cytoplasmic domain                                         | Q9P077 | TMEM9     | NA | Inverse variance weighted | 7  | -0.056 | 0.058 | 3.278E-01 | 0.957 | pan | Severe COVID-19 |
| 17783_9   | MMAB                         | Cob(II)irinic acid a,c-diamide adenosyltransferase, mitochondrial                  | Q96EY8 | MMAB      | NA | Inverse variance weighted | 6  | -0.052 | 0.053 | 3.281E-01 | 0.957 | pan | Severe COVID-19 |
| 12975_11  | Keratin 20                   | Keratin, type I cytoskeletal 20                                                    | P35900 | KRT20     | NA | Inverse variance weighted | 3  | -0.188 | 0.193 | 3.284E-01 | 0.957 | pan | Severe COVID-19 |
| 15535_3   | Marapsin                     | Serine protease 27                                                                 | Q9BQR3 | PRSS27    | NA | Inverse variance weighted | 11 | 0.088  | 0.090 | 3.294E-01 | 0.957 | pan | Severe COVID-19 |
| 14054_17  | IL-15 Ra                     | Interleukin-15 receptor subunit alpha                                              | Q13261 | IL15RA    | NA | Inverse variance weighted | 8  | 0.041  | 0.042 | 3.294E-01 | 0.957 | pan | Severe COVID-19 |
| 12554_10  | RA51D                        | DNA repair protein RAD51 homolog 4                                                 | Q75771 | RAD51D    | NA | Inverse variance weighted | 3  | -0.216 | 0.221 | 3.297E-01 | 0.957 | pan | Severe COVID-19 |
| 3079_62   | TIG2                         | Retinoic acid receptor responder protein 2                                         | Q99969 | RARRES2   | NA | Inverse variance weighted | 2  | 0.079  | 0.081 | 3.298E-01 | 0.957 | pan | Severe COVID-19 |
| 3628_3    | MP2K2                        | Dual specificity mitogen-activated protein kinase kinase 2                         | P36507 | MAP2K2    | NA | Inverse variance weighted | 6  | -0.120 | 0.123 | 3.303E-01 | 0.957 | pan | Severe COVID-19 |
| 9263_57   | SIAE                         | Sialate O-acetyltransferase                                                        | Q9HAT2 | SIAE      | NA | Inverse variance weighted | 3  | 0.177  | 0.182 | 3.312E-01 | 0.958 | pan | Severe COVID-19 |
| 2567_5    | Factor I                     | Complement factor I                                                                | P05156 | CFI       | NA | Inverse variance weighted | 2  | 0.109  | 0.112 | 3.318E-01 | 0.958 | pan | Severe COVID-19 |
| 17828_3   | S100A14                      | Protein S100-A14                                                                   | Q9HCY8 | S100A14   | NA | Wald ratio                | 1  | 0.371  | 0.382 | 3.321E-01 | 0.958 | pan | Severe COVID-19 |
| 5451_1    | ALCAM                        | CD166 antigen                                                                      | Q13740 | ALCAM     | NA | Inverse variance weighted | 5  | 0.114  | 0.118 | 3.322E-01 | 0.958 | pan | Severe COVID-19 |
| 8043_153  | COMP                         | Cartilage oligomeric matrix protein                                                | P49747 | COMP      | NA | Inverse variance weighted | 8  | 0.065  | 0.067 | 3.327E-01 | 0.958 | pan | Severe COVID-19 |
| 9216_100  | PLXB2                        | Plexin-B2                                                                          | O15031 | PLXNB2    | NA | Inverse variance weighted | 8  | -0.052 | 0.054 | 3.333E-01 | 0.958 | pan | Severe COVID-19 |
| 3195_50   | Granulysin                   | Granulysin                                                                         | P22749 | GNLY      | NA | Inverse variance weighted | 17 | 0.040  | 0.042 | 3.340E-01 | 0.958 | pan | Severe COVID-19 |
| 17814_8   | BPNT1                        | 3'(2'),5'-bisphosphate nucleotidase 1                                              | O95861 | BPNT1     | NA | Wald ratio                | 1  | 0.264  | 0.274 | 3.343E-01 | 0.958 | pan | Severe COVID-19 |
| 6392_7    | WISP-2                       | WNT1-inducible-signaling pathway protein 2                                         | O76076 | CN5       | NA | Inverse variance weighted | 10 | 0.046  | 0.048 | 3.344E-01 | 0.958 | pan | Severe COVID-19 |
| 9265_10   | GLUP1                        | Glioma pathogenesis-related protein 1                                              | P48060 | GLUPR1    | NA | Wald ratio                | 1  | -0.162 | 0.169 | 3.354E-01 | 0.959 | pan | Severe COVID-19 |
| 3727_35   | PYY                          | Peptide YY                                                                         | P10082 | PYY       | NA | Inverse variance weighted | 4  | -0.125 | 0.130 | 3.357E-01 | 0.959 | pan | Severe COVID-19 |
| 8048_9    | FTMT                         | Ferritin, mitochondrial                                                            | Q8N4E7 | FTMT      | NA | Inverse variance weighted | 8  | -0.079 | 0.083 | 3.368E-01 | 0.959 | pan | Severe COVID-19 |
| 3285_23   | C1r                          | Complement C1r subcomponent                                                        | P00736 | C1R       | NA | Inverse variance weighted | 2  | -0.482 | 0.503 | 3.371E-01 | 0.959 | pan | Severe COVID-19 |
| 7648_9    | MYPC1                        | Myosin-binding protein C, slow-type                                                | Q00872 | MYBPC1    | NA | Inverse variance weighted | 2  | -0.248 | 0.259 | 3.372E-01 | 0.959 | pan | Severe COVID-19 |
| 3166_92   | Siglec-3                     | Myeloid cell surface antigen CD33                                                  | P20138 | CD33      | NA | Inverse variance weighted | 6  | 0.031  | 0.032 | 3.382E-01 | 0.961 | pan | Severe COVID-19 |
| 19504_22  | KTHY                         | Thymidylate kinase                                                                 | P23919 | DTYMK     | NA | Inverse variance weighted | 3  | 0.247  | 0.258 | 3.391E-01 | 0.961 | pan | Severe COVID-19 |
| 10534_40  | PARP:BRCT domain             | Poly [ADP-ribose] polymerase 1:BRCA1 C-terminal:BRCA1 C-terminus domain            | P09874 | PARP1     | NA | Wald ratio                | 1  | -0.311 | 0.326 | 3.398E-01 | 0.961 | pan | Severe COVID-19 |
| 19277_4   | KAT                          | Thiosulfate sulfurtransferase/rhodanese-like domain-containing protein 1           | Q8NFJ3 | TSTD1     | NA | Inverse variance weighted | 3  | 0.087  | 0.092 | 3.400E-01 | 0.961 | pan | Severe COVID-19 |
| 3320_49   | IGFBP-7                      | Insulin-like growth factor-binding protein 7                                       | Q16270 | IGFBP7    | NA | Inverse variance weighted | 9  | -0.057 | 0.060 | 3.405E-01 | 0.961 | pan | Severe COVID-19 |
| 6373_54   | DLK1                         | Protein delta homolog 1                                                            | P80370 | DLK1      | NA | Inverse variance weighted | 3  | -0.263 | 0.276 | 3.408E-01 | 0.961 | pan | Severe COVID-19 |
| 6507_16   | NCAM2                        | Neural cell adhesion molecule 2                                                    | O15394 | NCAM2     | NA | Inverse variance weighted | 7  | 0.031  | 0.033 | 3.411E-01 | 0.961 | pan | Severe COVID-19 |
| 13109_82  | NEGR1                        | Neuronal growth regulator 1                                                        | Q7Z3B1 | NEGR1     | NA | Inverse variance weighted | 2  | -0.181 | 0.191 | 3.412E-01 | 0.961 | pan | Severe COVID-19 |
| 15594_47  | HTRA1                        | Serine protease HTRA1                                                              | Q92743 | HTRA1     | NA | Inverse variance weighted | 2  | -0.206 | 0.217 | 3.429E-01 | 0.963 | pan | Severe COVID-19 |
| 12727_7   | FRP                          | Prostaglandin F2 receptor negative regulator                                       | Q9P282 | PTGFRN    | NA | Inverse variance weighted | 14 | 0.038  | 0.040 | 3.432E-01 | 0.963 | pan | Severe COVID-19 |
| 19581_15  | IGFBP-5                      | Insulin-like growth factor-binding protein 5                                       | P24593 | IGFBP5    | NA | Wald ratio                | 1  | 0.274  | 0.289 | 3.436E-01 | 0.963 | pan | Severe COVID-19 |
| 6077_63   | CECR1                        | Adenosine deaminase CECR1                                                          | Q9NZK5 | ADA2      | NA | Inverse variance weighted | 4  | -0.096 | 0.101 | 3.443E-01 | 0.963 | pan | Severe COVID-19 |
| 17515_6   | STCH                         | Heat shock 70 kDa protein 13                                                       | P48723 | HSPA13    | NA | Inverse variance weighted | 2  | 0.138  | 0.146 | 3.458E-01 | 0.963 | pan | Severe COVID-19 |
| 12851_5   | DPOLM                        | DNA-directed DNA/RNA polymerase mu                                                 | Q9NP87 | POLM      | NA | Inverse variance weighted | 3  | 0.097  | 0.103 | 3.469E-01 | 0.963 | pan | Severe COVID-19 |
| 19227_18  | BATF                         | Basic leucine zipper transcriptional factor ATF-like                               | Q16520 | BATF      | NA | Wald ratio                | 1  | 0.305  | 0.325 | 3.474E-01 | 0.963 | pan | Severe COVID-19 |
| 8687_26   | TIO6B                        | Transmembrane protein 106B                                                         | Q9NUM4 | TMEM106B  | NA | Inverse variance weighted | 3  | -0.117 | 0.124 | 3.475E-01 | 0.963 | pan | Severe COVID-19 |
| 3710_49   | Angiostatin                  | Angiostatin                                                                        | P00747 | PLG       | NA | Inverse variance weighted | 8  | -0.108 | 0.115 | 3.484E-01 | 0.963 | pan | Severe COVID-19 |
| 19228_11  | BAG-2                        | BAG family molecular chaperone regulator 2                                         | O95816 | BAG2      | NA | Inverse variance weighted | 2  | -0.371 | 0.396 | 3.485E-01 | 0.963 | pan | Severe COVID-19 |
| 7857_22   | NEUT                         | Neurotensin/neuromedin N                                                           | P30990 | NTS       | NA | Inverse variance weighted | 5  | 0.088  | 0.094 | 3.494E-01 | 0.963 | pan | Severe COVID-19 |
| 17685_9   | Apo A-IV                     | Apolipoprotein A-IV                                                                | P06727 | APOA4     | NA | Wald ratio                | 1  | -0.351 | 0.376 | 3.501E-01 | 0.963 | pan | Severe COVID-19 |
| 7211_2    | RNase 1                      | Ribonuclease pancreatic                                                            | P07998 | RNASE1    | NA | Inverse variance weighted | 6  | -0.116 | 0.124 | 3.508E-01 | 0.963 | pan | Severe COVID-19 |
| 2677_1    | ERBB1                        | Epidermal growth factor receptor                                                   | P00533 | EGFR      | NA | Inverse variance weighted | 5  | 0.086  | 0.092 | 3.525E-01 | 0.963 | pan | Severe COVID-19 |
| 5111_15   | NRX3B                        | Neurexin-3-beta                                                                    | Q9HDB5 | NRXN3     | NA | Inverse variance weighted | 3  | 0.192  | 0.206 | 3.529E-01 | 0.963 | pan | Severe COVID-19 |
| 3043_49   | ON                           | SPARC                                                                              | P09486 | SPARC     | NA | Inverse variance weighted | 2  | 0.170  | 0.183 | 3.530E-01 | 0.963 | pan | Severe COVID-19 |
| 18181_2   | TSSC4                        | Protein TSSC4                                                                      | Q9YSU2 | TSSC4     | NA | Wald ratio                | 1  | -0.478 | 0.515 | 3.532E-01 | 0.963 | pan | Severe COVID-19 |
| 5355_69   | LIGHT                        | Tumor necrosis factor ligand superfamily member 14                                 | Q43557 | TNFSF14   | NA | Wald ratio                | 1  | -0.139 | 0.150 | 3.534E-01 | 0.963 | pan | Severe COVID-19 |
| 13580_2   | Sperm-associated antigen 2   | UDP-N-acetylhexosamine pyrophosphorylase                                           | Q16222 | UAP1      | NA | Wald ratio                | 1  | -0.428 | 0.462 | 3.542E-01 | 0.963 | pan | Severe COVID-19 |
| 19117_3   | PP14A                        | Protein phosphatase 1 regulatory subunit 14A                                       | Q96A00 | PPP1R14A  | NA | Inverse variance weighted | 2  | 0.186  | 0.201 | 3.545E-01 | 0.963 | pan | Severe COVID-19 |

|           |                              |                                                                     |        |          |    |                           |    |        |       |           |       |     |                 |
|-----------|------------------------------|---------------------------------------------------------------------|--------|----------|----|---------------------------|----|--------|-------|-----------|-------|-----|-----------------|
| 12486_8   | GLRX2                        | Glutaredoxin-2, mitochondrial                                       | Q9NS18 | GLRX2    | NA | Inverse variance weighted | 3  | 0.085  | 0.092 | 3.546E-01 | 0.963 | pan | Severe COVID-19 |
| 9482_110  | NUDT9                        | ADP-ribose pyrophosphatase, mitochondrial                           | Q9BW91 | NUDT9    | NA | Wald ratio                | 1  | -0.293 | 0.317 | 3.553E-01 | 0.963 | pan | Severe COVID-19 |
| 16900_29  | MDGA1                        | MAM domain-containing glycosylphosphatidylinositol anchor protein 1 | Q9BNF4 | MDGA1    | NA | Inverse variance weighted | 12 | -0.029 | 0.032 | 3.558E-01 | 0.963 | pan | Severe COVID-19 |
| 4564_2    | PLXC1                        | Plexin-C1                                                           | O60486 | PLXNC1   | NA | Inverse variance weighted | 11 | 0.020  | 0.022 | 3.558E-01 | 0.963 | pan | Severe COVID-19 |
| 6997_32   | RAB26                        | Ras-related protein Rab-26                                          | Q9ULW5 | RAB26    | NA | Inverse variance weighted | 3  | -0.205 | 0.222 | 3.560E-01 | 0.963 | pan | Severe COVID-19 |
| 9416_77   | CBPM                         | Carboxypeptidase M                                                  | P14384 | CPM      | NA | Inverse variance weighted | 5  | 0.094  | 0.102 | 3.560E-01 | 0.963 | pan | Severe COVID-19 |
| 10080_9   | E12BA                        | Translation initiation factor eIF-2B subunit alpha                  | Q14232 | E1F2B1   | NA | Wald ratio                | 1  | 0.241  | 0.261 | 3.567E-01 | 0.963 | pan | Severe COVID-19 |
| 6538_90   | K2013                        | Uncharacterized protein KIAA2013                                    | Q8IY52 | KIAA2013 | NA | Inverse variance weighted | 2  | 0.193  | 0.210 | 3.570E-01 | 0.963 | pan | Severe COVID-19 |
| 5464_52   | GRB2 adapter protein         | Growth factor receptor-bound protein 2                              | P62993 | GRB2     | NA | Wald ratio                | 1  | 0.371  | 0.403 | 3.573E-01 | 0.963 | pan | Severe COVID-19 |
| 10833_64  | HHIP                         | Hedgehog-interacting protein                                        | Q96QV1 | HHIP     | NA | Inverse variance weighted | 3  | -0.080 | 0.086 | 3.574E-01 | 0.963 | pan | Severe COVID-19 |
| 11229_16  | ERN1                         | Serine/threonine-protein kinase/endoribonuclease IRE1               | Q75460 | ERN1     | NA | Wald ratio                | 1  | 0.503  | 0.547 | 3.578E-01 | 0.963 | pan | Severe COVID-19 |
| 6455_52   | HPLN4                        | Hyaluronan and proteoglycan link protein 4                          | Q86UW8 | HAPLN4   | NA | Wald ratio                | 1  | 0.289  | 0.316 | 3.596E-01 | 0.963 | pan | Severe COVID-19 |
| 2620_4    | gp130, soluble               | Interleukin-6 receptor subunit beta                                 | P40189 | IL6ST    | NA | Inverse variance weighted | 10 | 0.041  | 0.045 | 3.600E-01 | 0.963 | pan | Severe COVID-19 |
| 12628_31  | LANC2                        | LanC-like protein 2                                                 | Q9NS86 | LANCL2   | NA | Wald ratio                | 1  | 0.293  | 0.321 | 3.600E-01 | 0.963 | pan | Severe COVID-19 |
| 9790_28   | BR serine/threonine kinase 2 | Serine/threonine-protein kinase BRSK2                               | Q8IWQ3 | BRSK2    | NA | Wald ratio                | 1  | -0.089 | 0.097 | 3.601E-01 | 0.963 | pan | Severe COVID-19 |
| 16318_12  | ALK-1                        | Serine/threonine-protein kinase receptor R3                         | P37023 | ACVRL1   | NA | Inverse variance weighted | 3  | 0.069  | 0.076 | 3.607E-01 | 0.963 | pan | Severe COVID-19 |
| 17325_10  | KGUA                         | Guanylate kinase                                                    | Q16774 | GUK1     | NA | Inverse variance weighted | 6  | -0.062 | 0.068 | 3.613E-01 | 0.963 | pan | Severe COVID-19 |
| 16288_17  | EPHA4                        | Ephrin type-A receptor 4                                            | P54764 | EPHA4    | NA | Inverse variance weighted | 5  | -0.068 | 0.075 | 3.619E-01 | 0.963 | pan | Severe COVID-19 |
| 8014_359  | MANEA                        | Glycoprotein endo-alpha-1,2-mannosidase                             | Q5SR19 | MANEA    | NA | Inverse variance weighted | 19 | -0.020 | 0.022 | 3.620E-01 | 0.963 | pan | Severe COVID-19 |
| 3798_71   | Carbonic anhydrase 9         | Carbonic anhydrase 9                                                | Q16790 | CA9      | NA | Wald ratio                | 1  | 0.362  | 0.398 | 3.622E-01 | 0.963 | pan | Severe COVID-19 |
| 10600_24  | CLGN                         | Calmequin                                                           | Q14967 | CLGN     | NA | Inverse variance weighted | 3  | -0.148 | 0.163 | 3.629E-01 | 0.963 | pan | Severe COVID-19 |
| 9793_145  | IGDC4                        | Immunoglobulin superfamily DCC subclass member 4                    | Q8TDY8 | IGDCC4   | NA | Inverse variance weighted | 8  | -0.039 | 0.043 | 3.629E-01 | 0.963 | pan | Severe COVID-19 |
| 14048_7   | IL-1 R AcP                   | Interleukin-1 Receptor accessory protein                            | Q9NPH3 | IL1RAP   | NA | Inverse variance weighted | 6  | -0.021 | 0.023 | 3.633E-01 | 0.963 | pan | Severe COVID-19 |
| 11656_110 | EVL                          | Ena/VASP-like protein                                               | Q9UI08 | EVL      | NA | Inverse variance weighted | 3  | 0.170  | 0.187 | 3.638E-01 | 0.963 | pan | Severe COVID-19 |
| 13231_90  | IgG4, Kappa                  | Ig gamma-4, Kappa                                                   | P01861 | IGHG4    | NA | Inverse variance weighted | 2  | 0.206  | 0.227 | 3.643E-01 | 0.963 | pan | Severe COVID-19 |
| 11104_13  | YKL-40                       | Chitinase-3-like protein 1                                          | P36222 | CHI3L1   | NA | Inverse variance weighted | 11 | -0.027 | 0.030 | 3.667E-01 | 0.963 | pan | Severe COVID-19 |
| 15589_1   | Gc-Globulin, Mixed Type      | Vitamin D-binding protein                                           | P02774 | GC       | NA | Inverse variance weighted | 4  | 0.091  | 0.101 | 3.669E-01 | 0.963 | pan | Severe COVID-19 |
| 12956_40  | KBP                          | KIF1-binding protein                                                | Q96EK5 | KIFBP    | NA | Wald ratio                | 1  | 0.317  | 0.351 | 3.673E-01 | 0.963 | pan | Severe COVID-19 |
| 2913_1    | MP1F-1                       | C-C motif chemokine 23                                              | P55773 | CCL23    | NA | Inverse variance weighted | 4  | 0.118  | 0.131 | 3.673E-01 | 0.963 | pan | Severe COVID-19 |
| 6600_70   | RELL2                        | RELT-like protein 2                                                 | Q8NC24 | RELL2    | NA | Wald ratio                | 1  | -0.227 | 0.252 | 3.674E-01 | 0.963 | pan | Severe COVID-19 |
| 13423_94  | CJ058                        | Redox-regulatory protein FAM213A                                    | Q9BRX8 | PRXL2A   | NA | Wald ratio                | 1  | 0.275  | 0.306 | 3.680E-01 | 0.963 | pan | Severe COVID-19 |
| 14156_33  | 14-3-3 protein beta/alpha    | 14-3-3 protein beta/alpha                                           | P31946 | YWHA8    | NA | Wald ratio                | 1  | 0.242  | 0.269 | 3.685E-01 | 0.963 | pan | Severe COVID-19 |
| 9898_161  | ARI1A                        | AT-rich interactive domain-containing protein 1A                    | O14497 | ARID1A   | NA | Wald ratio                | 1  | 0.394  | 0.439 | 3.694E-01 | 0.963 | pan | Severe COVID-19 |
| 3457_57   | Periostin                    | Periostin                                                           | Q15063 | POSTN    | NA | Inverse variance weighted | 4  | 0.057  | 0.064 | 3.706E-01 | 0.963 | pan | Severe COVID-19 |
| 10708_3   | GON2                         | Progonadoliberin-2                                                  | O43555 | GNRH2    | NA | Wald ratio                | 1  | -0.129 | 0.144 | 3.724E-01 | 0.963 | pan | Severe COVID-19 |
| 17799_9   | 6PGL                         | 6-phosphogluconolactonase                                           | O95336 | PGLS     | NA | Inverse variance weighted | 4  | -0.137 | 0.153 | 3.724E-01 | 0.963 | pan | Severe COVID-19 |
| 7822_11   | HRSL2                        | HRAS-like suppressor 2                                              | Q9NWW9 | PLAAT2   | NA | Wald ratio                | 1  | -0.286 | 0.321 | 3.733E-01 | 0.963 | pan | Severe COVID-19 |
| 4294_16   | Sphingosine kinase 1         | Sphingosine kinase 1                                                | Q9NYA1 | SPHK1    | NA | Inverse variance weighted | 3  | 0.163  | 0.183 | 3.735E-01 | 0.963 | pan | Severe COVID-19 |
| 3415_61   | BSP                          | Bone sialoprotein 2                                                 | P21815 | IBSP     | NA | Inverse variance weighted | 2  | -0.274 | 0.308 | 3.737E-01 | 0.963 | pan | Severe COVID-19 |
| 13113_7   | Osteopontin                  | Osteopontin                                                         | P10451 | SPP1     | NA | Inverse variance weighted | 5  | 0.072  | 0.081 | 3.738E-01 | 0.963 | pan | Severe COVID-19 |
| 8948_13   | ADA19                        | Disintegrin and metalloproteinase domain-containing protein 19      | Q9H013 | ADAM19   | NA | Wald ratio                | 1  | -0.372 | 0.419 | 3.745E-01 | 0.963 | pan | Severe COVID-19 |
| 7947_19   | AP4AT                        | AP-4 complex accessory subunit tepsin                               | Q96N21 | TEPSIN   | NA | Wald ratio                | 1  | 0.250  | 0.282 | 3.746E-01 | 0.963 | pan | Severe COVID-19 |
| 5837_49   | Ulf sR                       | Leukemia inhibitory factor receptor                                 | P42702 | LIFR     | NA | Inverse variance weighted | 9  | 0.069  | 0.078 | 3.753E-01 | 0.963 | pan | Severe COVID-19 |
| 3331_8    | RGMB                         | RGM domain family member B                                          | Q6NW40 | RGMB     | NA | Wald ratio                | 1  | -0.286 | 0.323 | 3.755E-01 | 0.963 | pan | Severe COVID-19 |
| 3389_7    | PCI                          | Plasma serine protease inhibitor                                    | P05154 | SERPINA5 | NA | Inverse variance weighted | 2  | -0.170 | 0.192 | 3.760E-01 | 0.963 | pan | Severe COVID-19 |
| 11302_237 | TENR                         | Tenascin-R                                                          | Q92752 | TNR      | NA | Inverse variance weighted | 3  | 0.201  | 0.228 | 3.765E-01 | 0.963 | pan | Severe COVID-19 |
| 6049_64   | PTPRS                        | Receptor-type tyrosine-protein phosphatase 5                        | Q13332 | PTPRS    | NA | Inverse variance weighted | 4  | -0.114 | 0.130 | 3.777E-01 | 0.963 | pan | Severe COVID-19 |
| 6255_74   | CPXM1                        | Probable carboxypeptidase X1                                        | Q96SM3 | CPXM1    | NA | Inverse variance weighted | 5  | -0.058 | 0.066 | 3.777E-01 | 0.963 | pan | Severe COVID-19 |
| 15602_43  | IL-6 sRa                     | Interleukin-6 receptor subunit alpha                                | P08887 | IL6R     | NA | Inverse variance weighted | 15 | -0.036 | 0.041 | 3.780E-01 | 0.963 | pan | Severe COVID-19 |
| 2962_50   | PTHrP                        | Parathyroid hormone-related protein                                 | P12272 | PTHLH    | NA | Inverse variance weighted | 3  | 0.099  | 0.112 | 3.782E-01 | 0.963 | pan | Severe COVID-19 |
| 9796_4    | CEL                          | Bile salt-activated lipase                                          | P19835 | CEL      | NA | Inverse variance weighted | 7  | 0.044  | 0.050 | 3.783E-01 | 0.963 | pan | Severe COVID-19 |
| 10391_1   | ANGL3                        | Angiotensin-related protein 3                                       | Q9Y5C1 | ANGPTL3  | NA | Inverse variance weighted | 9  | -0.051 | 0.058 | 3.784E-01 | 0.963 | pan | Severe COVID-19 |
| 8042_88   | ISK9                         | Serine protease inhibitor Kazal-type 9                              | Q5DT21 | SPINK9   | NA | Inverse variance weighted | 5  | -0.128 | 0.146 | 3.785E-01 | 0.963 | pan | Severe COVID-19 |
| 12356_65  | Sorcin                       | Sorcin                                                              | P30626 | SRI      | NA | Wald ratio                | 1  | 0.114  | 0.130 | 3.793E-01 | 0.963 | pan | Severe COVID-19 |
| 13094_75  | RSP03                        | R-spondin-3                                                         | Q9BXV4 | RSP03    | NA | Inverse variance weighted | 2  | 0.204  | 0.232 | 3.793E-01 | 0.963 | pan | Severe COVID-19 |
| 3283_21   | BGH3                         | Transforming growth factor-beta-induced protein ig-h3               | Q15582 | TGFB1    | NA | Inverse variance weighted | 11 | -0.041 | 0.047 | 3.798E-01 | 0.963 | pan | Severe COVID-19 |
| 18312_68  | NDRG3                        | Protein NDRG3                                                       | Q9UGV2 | NDRG3    | NA | Inverse variance weighted | 3  | 0.196  | 0.223 | 3.798E-01 | 0.963 | pan | Severe COVID-19 |
| 7223_60   | S100A13                      | Protein S100-A13                                                    | Q9NS84 | S100A13  | NA | Inverse variance weighted | 6  | 0.082  | 0.093 | 3.804E-01 | 0.963 | pan | Severe COVID-19 |
| 19372_7   | MDGA2                        | MAM domain-containing glycosylphosphatidylinositol anchor protein 2 | Q7Z553 | MDGA2    | NA | Inverse variance weighted | 19 | -0.020 | 0.023 | 3.813E-01 | 0.963 | pan | Severe COVID-19 |
| 5202_4    | PPID                         | Peptidyl-prolyl cis-trans isomerase D                               | Q08752 | PPID     | NA | Inverse variance weighted | 5  | -0.048 | 0.055 | 3.814E-01 | 0.963 | pan | Severe COVID-19 |
| 6289_78   | RHG36                        | Rho GTPase-activating protein 36                                    | Q6ZR18 | ARHGAP36 | NA | Wald ratio                | 1  | -0.283 | 0.323 | 3.815E-01 | 0.963 | pan | Severe COVID-19 |
| 7948_129  | GLTD2                        | Glycolipid transfer protein domain-containing protein 2             | A6NH11 | GLTPD2   | NA | Inverse variance weighted | 3  | 0.067  | 0.076 | 3.818E-01 | 0.963 | pan | Severe COVID-19 |
| 5598_3    | GREM2                        | Gremlin-2                                                           | Q9H772 | GREM2    | NA | Wald ratio                | 1  | -0.214 | 0.245 | 3.819E-01 | 0.963 | pan | Severe COVID-19 |
| 14131_37  | EFNB2:ECD                    | Ephrin-B2:Extracellular domain                                      | P52799 | EFNB2    | NA | Inverse variance weighted | 2  | 0.230  | 0.263 | 3.819E-01 | 0.963 | pan | Severe COVID-19 |
| 3438_10   | FSTL3                        | Follistatin-related protein 3                                       | O95633 | FSTL3    | NA | Inverse variance weighted | 2  | 0.165  | 0.189 | 3.821E-01 | 0.963 | pan | Severe COVID-19 |
| 3352_80   | Carbonic anhydrase 6         | Carbonic anhydrase 6                                                | P23280 | CA6      | NA | Inverse variance weighted | 17 | -0.031 | 0.036 | 3.824E-01 | 0.963 | pan | Severe COVID-19 |
| 8479_4    | MMP-10                       | Stromelysin-2                                                       | P09238 | MMP10    | NA | Inverse variance weighted | 9  | -0.056 | 0.065 | 3.825E-01 | 0.963 | pan | Severe COVID-19 |
| 9038_12   | JTB                          | Protein JTB                                                         | O76095 | JTB      | NA | Wald ratio                | 1  | -0.229 | 0.263 | 3.826E-01 | 0.963 | pan | Severe COVID-19 |
| 6425_87   | MMP19                        | Matrix metalloproteinase-19                                         | Q9NS42 | MMP19    | NA | Inverse variance weighted | 4  | -0.126 | 0.144 | 3.826E-01 | 0.963 | pan | Severe COVID-19 |
| 18880_81  | Collagen Type III            | Collagen Type III                                                   | P02461 | COL3A1   | NA | Inverse variance weighted | 9  | -0.100 | 0.114 | 3.830E-01 | 0.963 | pan | Severe COVID-19 |
| 18330_7   | PGM2                         | Phosphoglucomutase-2                                                | Q96G03 | PGM2     | NA | Inverse variance weighted | 7  | 0.065  | 0.075 | 3.830E-01 | 0.963 | pan | Severe COVID-19 |
| 16915_153 | SEMA4A                       | Semaphorin-4A                                                       | Q9H351 | SEMA4A   | NA | Inverse variance weighted | 8  | 0.084  | 0.096 | 3.834E-01 | 0.963 | pan | Severe COVID-19 |
| 18338_26  | IDH                          | Isocitrate dehydrogenase [NADP] cytoplasmic                         | O75874 | IDH1     | NA | Inverse variance weighted | 3  | -0.075 | 0.086 | 3.843E-01 | 0.963 | pan | Severe COVID-19 |
| 11708_2   | LCN1                         | Lipocalin-1                                                         | P31025 | LCN1     | NA | Wald ratio                | 1  | -0.377 | 0.433 | 3.843E-01 | 0.963 | pan | Severe COVID-19 |
| 3292_75   | CD48                         | CD48 antigen                                                        | P09326 | CD48     | NA | Inverse variance weighted | 9  | 0.167  | 0.192 | 3.849E-01 | 0.963 | pan | Severe COVID-19 |
| 9021_1    | TIM-1                        | Hepatitis A virus cellular receptor 1                               | Q96D42 | HAVCR1   | NA | Inverse variance weighted | 7  | -0.041 | 0.047 | 3.850E-01 | 0.963 | pan | Severe COVID-19 |
| 2797_56   | Apo B                        | Apolipoprotein B                                                    | P04114 | APOB     | NA | Wald ratio                | 1  | -0.262 | 0.302 | 3.856E-01 | 0.963 | pan | Severe COVID-19 |
| 9092_33   | ANGL1:N-term                 | Angiotensin-related protein 1:N-term                                | O9S841 | ANGPTL1  | NA | Wald ratio                | 1  | 0.248  | 0.286 | 3.859E-01 | 0.963 | pan | Severe COVID-19 |

|           |                                 |                                                                                            |        |            |    |                           |    |        |       |           |       |     |                 |
|-----------|---------------------------------|--------------------------------------------------------------------------------------------|--------|------------|----|---------------------------|----|--------|-------|-----------|-------|-----|-----------------|
| 6605_17   | IGFALS                          | Insulin-like growth factor-binding protein complex acid labile subunit                     | P35858 | IGFALS     | NA | Inverse variance weighted | 3  | 0.182  | 0.211 | 3.870E-01 | 0.964 | pan | Severe COVID-19 |
| 16851_50  | SCD2                            | Protein SCD2 homolog, mitochondrial                                                        | O43819 | SCD2       | NA | Wald ratio                | 1  | -0.138 | 0.160 | 3.881E-01 | 0.964 | pan | Severe COVID-19 |
| 19622_7   | Activin A                       | Activin A                                                                                  | P08476 | INHBA      | NA | Inverse variance weighted | 2  | 0.204  | 0.236 | 3.883E-01 | 0.964 | pan | Severe COVID-19 |
| 8326_63   | SIGIRR                          | Single Ig IL-1-related receptor                                                            | Q6IA17 | SIGIRR     | NA | Inverse variance weighted | 15 | -0.059 | 0.068 | 3.884E-01 | 0.964 | pan | Severe COVID-19 |
| 3305_6    | DLL4                            | Delta-like protein 4                                                                       | Q9NR61 | DLL4       | NA | Wald ratio                | 1  | 0.256  | 0.297 | 3.888E-01 | 0.964 | pan | Severe COVID-19 |
| 15326_64  | GBP1                            | Guanylate-binding protein 1                                                                | P32455 | GBP1       | NA | Inverse variance weighted | 9  | -0.059 | 0.068 | 3.891E-01 | 0.964 | pan | Severe COVID-19 |
| 5462_62   | Ficolin-3                       | Ficolin-3                                                                                  | O75636 | FCN3       | NA | Inverse variance weighted | 12 | -0.031 | 0.036 | 3.894E-01 | 0.964 | pan | Severe COVID-19 |
| 8368_102  | TNF SR-II                       | Tumor necrosis factor receptor superfamily member 1B                                       | P20333 | TNFRSF1B   | NA | Wald ratio                | 1  | -0.080 | 0.093 | 3.903E-01 | 0.965 | pan | Severe COVID-19 |
| 11208_15  | NAGPA                           | N-acetylglucosamine-1-phosphodiester alpha-N-acetylglucosaminidase                         | Q9UK23 | NAGPA      | NA | Inverse variance weighted | 7  | 0.032  | 0.037 | 3.913E-01 | 0.965 | pan | Severe COVID-19 |
| 15467_10  | CTHR1                           | Collagen triple helix repeat-containing protein 1                                          | Q96CG8 | CTHRC1     | NA | Inverse variance weighted | 2  | 0.401  | 0.468 | 3.915E-01 | 0.965 | pan | Severe COVID-19 |
| 11421_10  | EHDA                            | EH domain-containing protein 4                                                             | Q9H223 | EHDA       | NA | Wald ratio                | 1  | 0.126  | 0.147 | 3.924E-01 | 0.965 | pan | Severe COVID-19 |
| 2516_57   | 6Ckine                          | C-C motif chemokine 21                                                                     | O00585 | CCL21      | NA | Inverse variance weighted | 17 | -0.045 | 0.052 | 3.926E-01 | 0.965 | pan | Severe COVID-19 |
| 7968_15   | CRTAM                           | Cytotoxic and regulatory T-cell molecule                                                   | O95727 | CRTAM      | NA | Inverse variance weighted | 7  | -0.046 | 0.054 | 3.926E-01 | 0.965 | pan | Severe COVID-19 |
| 13700_10  | annexin II                      | Annexin A2                                                                                 | P07355 | ANXA2      | NA | Inverse variance weighted | 8  | -0.080 | 0.094 | 3.931E-01 | 0.965 | pan | Severe COVID-19 |
| 16323_8   | NRX3A                           | Neurexin-3                                                                                 | Q9Y4C0 | NRXN3      | NA | Inverse variance weighted | 3  | -0.168 | 0.197 | 3.952E-01 | 0.968 | pan | Severe COVID-19 |
| 18823_52  | H2B3B                           | Histone H2B type 3-B                                                                       | Q8N257 | H2BU1      | NA | Inverse variance weighted | 2  | 0.231  | 0.271 | 3.956E-01 | 0.968 | pan | Severe COVID-19 |
| 18831_6   | LRIG1                           | Leucine-rich repeats and immunoglobulin-like domains protein 1                             | Q96IA1 | LRIG1      | NA | Inverse variance weighted | 8  | -0.032 | 0.038 | 3.968E-01 | 0.968 | pan | Severe COVID-19 |
| 2948_58   | Growth hormone receptor         | Growth hormone receptor                                                                    | P10912 | GHR        | NA | Inverse variance weighted | 4  | 0.080  | 0.095 | 3.991E-01 | 0.968 | pan | Severe COVID-19 |
| 16857_2   | RAB2A                           | Ras-related protein Rab-2A                                                                 | P61019 | RAB2A      | NA | Wald ratio                | 1  | -0.181 | 0.216 | 4.006E-01 | 0.968 | pan | Severe COVID-19 |
| 9339_204  | FKBP2                           | Peptidyl-prolyl cis-trans isomerase FKBP2                                                  | P26885 | FKBP2      | NA | Wald ratio                | 1  | 0.270  | 0.321 | 4.006E-01 | 0.968 | pan | Severe COVID-19 |
| 11510_31  | Apo L1                          | Apolipoprotein L1                                                                          | O14791 | APOL1      | NA | Inverse variance weighted | 8  | -0.031 | 0.037 | 4.007E-01 | 0.968 | pan | Severe COVID-19 |
| 19175_18  | MARCKSL1                        | MARCKS-related protein                                                                     | P49006 | MARCKSL1   | NA | Inverse variance weighted | 7  | 0.144  | 0.171 | 4.007E-01 | 0.968 | pan | Severe COVID-19 |
| 14146_92  | H31                             | Histone H3.1                                                                               | P68431 | H3C1       | NA | Wald ratio                | 1  | 0.212  | 0.252 | 4.012E-01 | 0.968 | pan | Severe COVID-19 |
| 5657_28   | SIAAA                           | CMP-N-acetylneuraminate-beta-galactosamide-alpha-2,3-sialyltransferase 1                   | Q11201 | ST3GALL1   | NA | Inverse variance weighted | 3  | -0.077 | 0.091 | 4.012E-01 | 0.968 | pan | Severe COVID-19 |
| 18925_24  | Proteasome subunit alpha type 5 | Proteasome subunit alpha type-5                                                            | P28066 | PSMA5      | NA | Wald ratio                | 1  | -0.374 | 0.445 | 4.015E-01 | 0.968 | pan | Severe COVID-19 |
| 6380_23   | ICT1                            | Peptidyl-tRNA hydrolase ICT1, mitochondrial                                                | Q14197 | MRPL58     | NA | Wald ratio                | 1  | -0.175 | 0.208 | 4.015E-01 | 0.968 | pan | Severe COVID-19 |
| 14091_42  | Carbonyl reductase 3            | Carbonyl reductase [NADPH] 3                                                               | O75828 | CBR3       | NA | Inverse variance weighted | 5  | 0.037  | 0.044 | 4.020E-01 | 0.968 | pan | Severe COVID-19 |
| 11212_7   | TXND5                           | Thioredoxin domain-containing protein 5                                                    | Q8N859 | TXND5      | NA | Inverse variance weighted | 5  | 0.071  | 0.085 | 4.022E-01 | 0.968 | pan | Severe COVID-19 |
| 12685_57  | HOMER2                          | Homer protein homolog 2                                                                    | Q9NS88 | HOMER2     | NA | Inverse variance weighted | 2  | -0.251 | 0.300 | 4.023E-01 | 0.968 | pan | Severe COVID-19 |
| 17777_31  | SDSL                            | Serine dehydratase-like                                                                    | Q96GA7 | SDSL       | NA | Inverse variance weighted | 7  | 0.041  | 0.049 | 4.024E-01 | 0.968 | pan | Severe COVID-19 |
| 10737_96  | Serpin B1                       | Leukocyte elastase inhibitor                                                               | P30740 | SERPINB1   | NA | Wald ratio                | 1  | 0.273  | 0.327 | 4.032E-01 | 0.968 | pan | Severe COVID-19 |
| 12437_18  | ULK3                            | Serine/threonine-protein kinase ULK3                                                       | Q6PHR2 | ULK3       | NA | Wald ratio                | 1  | 0.248  | 0.297 | 4.034E-01 | 0.968 | pan | Severe COVID-19 |
| 4801_13   | PERL                            | Lactoperoxidase                                                                            | P22079 | LPO        | NA | Inverse variance weighted | 9  | 0.052  | 0.062 | 4.045E-01 | 0.968 | pan | Severe COVID-19 |
| 12382_2   | DDX58                           | Probable ATP-dependent RNA helicase DDX58                                                  | O95786 | DDX58      | NA | Inverse variance weighted | 3  | 0.080  | 0.096 | 4.047E-01 | 0.968 | pan | Severe COVID-19 |
| 8098_37   | THAS                            | Thromboxane-A synthase                                                                     | P24557 | TBXAS1     | NA | Wald ratio                | 1  | -0.188 | 0.225 | 4.047E-01 | 0.968 | pan | Severe COVID-19 |
| 12801_33  | IRF2                            | Interferon regulatory factor 2                                                             | P14316 | IRF2       | NA | Wald ratio                | 1  | -0.244 | 0.293 | 4.051E-01 | 0.968 | pan | Severe COVID-19 |
| 3504_58   | LEAP-1                          | Hepcidin                                                                                   | H81172 | HAMP       | NA | Wald ratio                | 1  | -0.248 | 0.298 | 4.051E-01 | 0.968 | pan | Severe COVID-19 |
| 2644_11   | PKC-A                           | Protein kinase C alpha type                                                                | P17252 | PRKCA      | NA | Wald ratio                | 1  | 0.317  | 0.381 | 4.054E-01 | 0.968 | pan | Severe COVID-19 |
| 8890_9    | T132B                           | Transmembrane protein 132B                                                                 | Q14DG7 | TMEM132B   | NA | Inverse variance weighted | 3  | -0.044 | 0.053 | 4.058E-01 | 0.968 | pan | Severe COVID-19 |
| 7124_18   | IL-21                           | Interleukin-21                                                                             | Q9HBE4 | IL21       | NA | Wald ratio                | 1  | 0.189  | 0.227 | 4.064E-01 | 0.968 | pan | Severe COVID-19 |
| 7228_2    | SIA7F                           | Alpha-N-acetylgalactosaminide alpha-2,6-sialyltransferase 6                                | Q969X2 | ST6GALNAC6 | NA | Inverse variance weighted | 3  | -0.167 | 0.201 | 4.065E-01 | 0.968 | pan | Severe COVID-19 |
| 17752_24  | Arginase                        | Arginase-2, mitochondrial                                                                  | P78540 | ARG2       | NA | Inverse variance weighted | 2  | 0.118  | 0.143 | 4.073E-01 | 0.969 | pan | Severe COVID-19 |
| 11145_72  | K154L                           | UPF0606 protein KIAA1549L                                                                  | Q6ZVL6 | KIAA1549L  | NA | Inverse variance weighted | 7  | -0.036 | 0.043 | 4.078E-01 | 0.969 | pan | Severe COVID-19 |
| 12634_79  | BCAR3-Ras-GEF                   | Breast cancer anti-estrogen resistance protein 3:Guanine Nucleotide Exchange Factor Domain | O75815 | BCAR3      | NA | Inverse variance weighted | 3  | -0.092 | 0.111 | 4.081E-01 | 0.969 | pan | Severe COVID-19 |
| 4337_49   | CRP                             | C-reactive protein                                                                         | P02741 | CRP        | NA | Inverse variance weighted | 7  | 0.084  | 0.101 | 4.091E-01 | 0.969 | pan | Severe COVID-19 |
| 5349_69   | DLL1                            | Delta-like protein 1                                                                       | O00548 | DLL1       | NA | Inverse variance weighted | 3  | 0.097  | 0.117 | 4.093E-01 | 0.969 | pan | Severe COVID-19 |
| 12659_13  | GTPB9                           | Obg-like ATPase 1                                                                          | Q9NTK5 | OLA1       | NA | Inverse variance weighted | 2  | -0.099 | 0.120 | 4.102E-01 | 0.970 | pan | Severe COVID-19 |
| 2911_27   | Midkine                         | Midkine                                                                                    | P21741 | MDK        | NA | Inverse variance weighted | 3  | 0.162  | 0.197 | 4.115E-01 | 0.972 | pan | Severe COVID-19 |
| 2515_14   | GFRA-2                          | GDNF family receptor alpha-2                                                               | O00451 | GFRA2      | NA | Inverse variance weighted | 7  | -0.042 | 0.051 | 4.116E-01 | 0.972 | pan | Severe COVID-19 |
| 8794_13   | DPEP1                           | Dipeptidase 1                                                                              | P16444 | DPEP1      | NA | Inverse variance weighted | 6  | 0.059  | 0.072 | 4.127E-01 | 0.972 | pan | Severe COVID-19 |
| 15441_6   | SAP3                            | Ganglioside GM2 activator                                                                  | P17900 | GM2A       | NA | Inverse variance weighted | 6  | -0.066 | 0.080 | 4.129E-01 | 0.972 | pan | Severe COVID-19 |
| 5430_66   | SHPS1                           | Tyrosine-protein phosphatase non-receptor type substrate 1                                 | P78324 | SIRPA      | NA | Inverse variance weighted | 9  | 0.024  | 0.030 | 4.140E-01 | 0.972 | pan | Severe COVID-19 |
| 8225_86   | EPH82                           | Ephrin type-B receptor 2                                                                   | P29323 | EPH82      | NA | Inverse variance weighted | 3  | 0.051  | 0.063 | 4.150E-01 | 0.972 | pan | Severe COVID-19 |
| 4435_66   | ENPP7                           | Ectonucleotide pyrophosphatase/phosphodiesterase family member 7                           | Q6UWV6 | ENPP7      | NA | Inverse variance weighted | 10 | 0.036  | 0.044 | 4.152E-01 | 0.972 | pan | Severe COVID-19 |
| 11431_235 | RECQ1                           | ATP-dependent DNA helicase Q1                                                              | P46063 | RECQL      | NA | Inverse variance weighted | 10 | 0.022  | 0.027 | 4.154E-01 | 0.972 | pan | Severe COVID-19 |
| 13460_4   | CHAD                            | Chondroadherin                                                                             | O15335 | CHAD       | NA | Inverse variance weighted | 2  | -0.149 | 0.184 | 4.171E-01 | 0.972 | pan | Severe COVID-19 |
| 19364_163 | PCNA                            | Proliferating cell nuclear antigen                                                         | P12004 | PCNA       | NA | Inverse variance weighted | 2  | -0.159 | 0.196 | 4.173E-01 | 0.972 | pan | Severe COVID-19 |
| 19176_27  | FA49B                           | Protein FAM49B                                                                             | Q9NUQ9 | CYRI8      | NA | Wald ratio                | 1  | 0.305  | 0.376 | 4.176E-01 | 0.972 | pan | Severe COVID-19 |
| 17140_57  | PDGFD                           | Platelet-derived growth factor D                                                           | Q9GZP0 | PDGFD      | NA | Inverse variance weighted | 5  | 0.106  | 0.131 | 4.177E-01 | 0.972 | pan | Severe COVID-19 |
| 13659_36  | AT131                           | Manganese-transporting ATPase 13A1                                                         | Q9HD20 | ATP13A1    | NA | Inverse variance weighted | 2  | 0.181  | 0.223 | 4.179E-01 | 0.972 | pan | Severe COVID-19 |
| 9244_27   | PPT1                            | Palmitoyl-protein thioesterase 1                                                           | P50897 | PPT1       | NA | Inverse variance weighted | 2  | -0.074 | 0.091 | 4.180E-01 | 0.972 | pan | Severe COVID-19 |
| 13473_55  | IP3KA                           | Inositol-trisphosphate 3-kinase A                                                          | P23677 | ITPKA      | NA | Wald ratio                | 1  | 0.172  | 0.213 | 4.186E-01 | 0.972 | pan | Severe COVID-19 |
| 9314_9    | PSG5                            | Pregnancy-specific beta-1-glycoprotein 5                                                   | Q15238 | PSG5       | NA | Inverse variance weighted | 4  | 0.119  | 0.147 | 4.186E-01 | 0.972 | pan | Severe COVID-19 |
| 17750_8   | RIR2                            | Ribonucleoside-diphosphate reductase subunit M2                                            | P31350 | RRM2       | NA | Inverse variance weighted | 2  | -0.159 | 0.196 | 4.192E-01 | 0.972 | pan | Severe COVID-19 |
| 14011_17  | S100A11                         | Protein S100-A11                                                                           | P31949 | S100A11    | NA | Inverse variance weighted | 3  | -0.068 | 0.084 | 4.197E-01 | 0.972 | pan | Severe COVID-19 |
| 9380_2    | sPLA(2)-XIII                    | Group XIIIB secretory phospholipase A2-like protein                                        | Q9BX93 | PLA2G12B   | NA | Inverse variance weighted | 2  | -0.165 | 0.205 | 4.207E-01 | 0.972 | pan | Severe COVID-19 |
| 19259_176 | IF2A                            | Eukaryotic translation initiation factor 2 subunit 1                                       | P05198 | EIF2S1     | NA | Wald ratio                | 1  | 0.267  | 0.331 | 4.208E-01 | 0.972 | pan | Severe COVID-19 |
| 13676_46  | Inhibin beta chain              | Inhibin beta B chain                                                                       | P09529 | INHBB      | NA | Inverse variance weighted | 6  | -0.050 | 0.062 | 4.208E-01 | 0.972 | pan | Severe COVID-19 |
| 13405_61  | ISK2                            | Serine protease inhibitor Kazal-type 2                                                     | P20155 | SPINK2     | NA | Inverse variance weighted | 6  | -0.034 | 0.042 | 4.210E-01 | 0.972 | pan | Severe COVID-19 |
| 18458_4   | PGES2                           | Prostaglandin E synthase 2                                                                 | Q9H727 | PTGES2     | NA | Wald ratio                | 1  | -0.162 | 0.201 | 4.211E-01 | 0.972 | pan | Severe COVID-19 |
| 4140_3    | IL-7                            | Interleukin-7                                                                              | P13232 | IL7        | NA | Wald ratio                | 1  | 0.265  | 0.332 | 4.236E-01 | 0.973 | pan | Severe COVID-19 |
| 4968_50   | CAPG                            | Macrophage-capping protein                                                                 | P40121 | CAPG       | NA | Inverse variance weighted | 8  | 0.040  | 0.050 | 4.242E-01 | 0.973 | pan | Severe COVID-19 |
| 14153_8   | Ephrin-A3                       | Ephrin-A3                                                                                  | P52797 | EFNA3      | NA | Wald ratio                | 1  | 0.209  | 0.262 | 4.246E-01 | 0.973 | pan | Severe COVID-19 |
| 5701_81   | Tetranectin                     | Tetranectin                                                                                | P05452 | CLEC3B     | NA | Inverse variance weighted | 3  | 0.180  | 0.226 | 4.253E-01 | 0.973 | pan | Severe COVID-19 |
| 3403_1    | TPSB2                           | Tryptase beta-2                                                                            | P20231 | TPSB2      | NA | Inverse variance weighted | 10 | 0.031  | 0.039 | 4.255E-01 | 0.973 | pan | Severe COVID-19 |
| 5109_24   | Nr-CAM                          | Neuronal cell adhesion molecule                                                            | Q92823 | NRCAM      | NA | Wald ratio                | 1  | 0.252  | 0.317 | 4.257E-01 | 0.973 | pan | Severe COVID-19 |
| 7950_142  | BTNL9                           | Butyrophilin-like protein 9                                                                | Q6UXG8 | BTNL9      | NA | Wald ratio                | 1  | 0.175  | 0.220 | 4.259E-01 | 0.973 | pan | Severe COVID-19 |
| 18214_2   | GSHO                            | Glutamate--cysteine ligase regulatory subunit                                              | P48507 | GCLM       | NA | Inverse variance weighted | 2  | 0.134  | 0.168 | 4.259E-01 | 0.973 | pan | Severe COVID-19 |

|           |                         |                                                                                      |        |         |    |                           |    |        |       |           |       |     |                 |
|-----------|-------------------------|--------------------------------------------------------------------------------------|--------|---------|----|---------------------------|----|--------|-------|-----------|-------|-----|-----------------|
| 5015_15   | PAFAH                   | Platelet-activating factor acetylhydrolase                                           | Q13093 | PLA2G7  | NA | Inverse variance weighted | 10 | -0.047 | 0.059 | 4.259E-01 | 0.973 | pan | Severe COVID-19 |
| 11308_8   | CR3L4                   | Cyclic AMP-responsive element-binding protein 3-like protein 4                       | Q8TE95 | CREB3L4 | NA | Inverse variance weighted | 8  | 0.072  | 0.090 | 4.265E-01 | 0.973 | pan | Severe COVID-19 |
| 11424_4   | FAAA                    | Fumarylacetoacetase                                                                  | P16930 | FAH     | NA | Inverse variance weighted | 7  | 0.054  | 0.068 | 4.271E-01 | 0.973 | pan | Severe COVID-19 |
| 7810_20   | C1QTNF5                 | Complement C1q tumor necrosis factor-related protein 5                               | Q9BXJ0 | C1QTNF5 | NA | Inverse variance weighted | 10 | 0.048  | 0.061 | 4.273E-01 | 0.973 | pan | Severe COVID-19 |
| 4588_1    | PH                      | Pancreatic hormone                                                                   | P01298 | PPY     | NA | Inverse variance weighted | 9  | -0.089 | 0.113 | 4.274E-01 | 0.973 | pan | Severe COVID-19 |
| 3516_60   | SDF-1                   | Stromal cell-derived factor 1                                                        | P48061 | CXCL12  | NA | Inverse variance weighted | 2  | -0.077 | 0.097 | 4.296E-01 | 0.973 | pan | Severe COVID-19 |
| 5021_13   | PPase                   | Inorganic pyrophosphatase                                                            | Q15181 | PPA1    | NA | Inverse variance weighted | 5  | -0.077 | 0.097 | 4.303E-01 | 0.973 | pan | Severe COVID-19 |
| 2778_10   | IL-22                   | Interleukin-22                                                                       | Q9GZ66 | IL22    | NA | Wald ratio                | 1  | -0.199 | 0.252 | 4.304E-01 | 0.973 | pan | Severe COVID-19 |
| 19153_53  | MPPD2                   | Metallophosphoesterase MPPED2                                                        | Q15777 | MPPED2  | NA | Inverse variance weighted | 2  | 0.138  | 0.175 | 4.305E-01 | 0.973 | pan | Severe COVID-19 |
| 2843_13   | SPINT2                  | Kunitz-type protease inhibitor 2                                                     | Q43291 | SPINT2  | NA | Inverse variance weighted | 15 | 0.031  | 0.039 | 4.315E-01 | 0.973 | pan | Severe COVID-19 |
| 8842_16   | GRM1C                   | GRAM domain-containing protein 1C                                                    | Q8IY50 | GRAMD1C | NA | Inverse variance weighted | 9  | 0.060  | 0.077 | 4.317E-01 | 0.973 | pan | Severe COVID-19 |
| 8484_24   | Leptin                  | Leptin                                                                               | P41159 | LEP     | NA | Inverse variance weighted | 4  | 0.173  | 0.220 | 4.320E-01 | 0.973 | pan | Severe COVID-19 |
| 16760_2   | IL-26                   | Interleukin-26                                                                       | Q9NPH9 | IL26    | NA | Inverse variance weighted | 4  | -0.128 | 0.163 | 4.325E-01 | 0.973 | pan | Severe COVID-19 |
| 13488_3   | ARFP1                   | Arfaptin-1                                                                           | P53367 | ARFP1   | NA | Inverse variance weighted | 2  | 0.082  | 0.104 | 4.326E-01 | 0.973 | pan | Severe COVID-19 |
| 3365_7    | Dkk-4                   | Dickkopf-related protein 4                                                           | Q9UBT3 | DKK4    | NA | Inverse variance weighted | 4  | 0.134  | 0.171 | 4.327E-01 | 0.973 | pan | Severe COVID-19 |
| 17350_13  | CHM2B                   | Charged multivesicular body protein 2b                                               | Q9UQN3 | CHMP2B  | NA | Inverse variance weighted | 3  | -0.059 | 0.075 | 4.330E-01 | 0.973 | pan | Severe COVID-19 |
| 3310_62   | FCG2B                   | Low affinity immunoglobulin gamma Fc region receptor II-b                            | P31994 | FCGR2B  | NA | Inverse variance weighted | 12 | 0.054  | 0.069 | 4.334E-01 | 0.973 | pan | Severe COVID-19 |
| 10693_43  | KLRG2:C-term            | Killer cell lectin-like receptor subfamily G member 2:C-term                         | A4D150 | KLRG2   | NA | Inverse variance weighted | 4  | 0.174  | 0.222 | 4.339E-01 | 0.973 | pan | Severe COVID-19 |
| 10851_77  | IL27B                   | Interleukin-27 subunit beta                                                          | Q14213 | EBI3    | NA | Inverse variance weighted | 10 | -0.023 | 0.029 | 4.350E-01 | 0.973 | pan | Severe COVID-19 |
| 8074_32   | TMM70                   | Transmembrane protein 70, mitochondrial                                              | Q98UB7 | TMEM70  | NA | Inverse variance weighted | 3  | 0.150  | 0.192 | 4.351E-01 | 0.973 | pan | Severe COVID-19 |
| 11601_26  | DHX8                    | ATP-dependent RNA helicase DHX8                                                      | Q14562 | DHX8    | NA | Inverse variance weighted | 4  | 0.095  | 0.122 | 4.370E-01 | 0.973 | pan | Severe COVID-19 |
| 17164_15  | annexin IV              | Annexin A4                                                                           | P09525 | ANXA4   | NA | Inverse variance weighted | 2  | 0.123  | 0.158 | 4.379E-01 | 0.973 | pan | Severe COVID-19 |
| 8773_172  | EMIL3:region 1          | EMILIN3:region 1                                                                     | Q9NT22 | EMILIN3 | NA | Inverse variance weighted | 6  | 0.047  | 0.061 | 4.385E-01 | 0.973 | pan | Severe COVID-19 |
| 4152_58   | Prekallikrein           | Plasma kallikrein                                                                    | P03952 | KKL81   | NA | Inverse variance weighted | 4  | 0.111  | 0.144 | 4.392E-01 | 0.973 | pan | Severe COVID-19 |
| 5698_60   | Tenascin-X              | Tenascin-X                                                                           | P22105 | TNXB    | NA | Inverse variance weighted | 13 | 0.027  | 0.035 | 4.398E-01 | 0.973 | pan | Severe COVID-19 |
| 8231_122  | VEGF sR1                | Vascular endothelial growth factor receptor 1                                        | P17948 | FLT1    | NA | Inverse variance weighted | 4  | 0.157  | 0.203 | 4.405E-01 | 0.973 | pan | Severe COVID-19 |
| 17137_160 | Beta-globin             | Hemoglobin subunit beta                                                              | P68871 | HBB     | NA | Inverse variance weighted | 2  | 0.166  | 0.215 | 4.408E-01 | 0.973 | pan | Severe COVID-19 |
| 14082_56  | TLN2                    | Talin-2                                                                              | Q9Y4G6 | TLN2    | NA | Wald ratio                | 1  | 0.236  | 0.307 | 4.421E-01 | 0.973 | pan | Severe COVID-19 |
| 19230_12  | GSTT1                   | Glutathione S-transferase theta-1                                                    | P30711 | GSTT1   | NA | Inverse variance weighted | 11 | 0.038  | 0.049 | 4.422E-01 | 0.973 | pan | Severe COVID-19 |
| 7809_22   | SPAT9                   | Spermatogenesis-associated protein 9                                                 | Q98WV2 | SPAT9   | NA | Wald ratio                | 1  | -0.194 | 0.252 | 4.429E-01 | 0.973 | pan | Severe COVID-19 |
| 18340_2   | Proteasome beta chain   | Proteasome subunit beta type-4                                                       | P28070 | PSMB4   | NA | Inverse variance weighted | 4  | -0.041 | 0.053 | 4.443E-01 | 0.973 | pan | Severe COVID-19 |
| 9971_5    | CSMD2                   | CUB and sushi domain-containing protein 2                                            | Q7Z408 | CSMD2   | NA | Wald ratio                | 1  | 0.280  | 0.367 | 4.453E-01 | 0.973 | pan | Severe COVID-19 |
| 4145_58   | Neurotrophin-3          | Neurotrophin-3                                                                       | P20783 | NTF3    | NA | Inverse variance weighted | 5  | 0.088  | 0.116 | 4.453E-01 | 0.973 | pan | Severe COVID-19 |
| 6383_90   | TLL1                    | Tollloid-like protein 1                                                              | Q43897 | TLL1    | NA | Inverse variance weighted | 4  | 0.140  | 0.183 | 4.456E-01 | 0.973 | pan | Severe COVID-19 |
| 12687_2   | DECR                    | 2,4-dienoyl-CoA reductase, mitochondrial                                             | Q16698 | DECR1   | NA | Inverse variance weighted | 5  | -0.084 | 0.111 | 4.457E-01 | 0.973 | pan | Severe COVID-19 |
| 10047_12  | NCF-2                   | Neutrophil cytosol factor 2                                                          | P19878 | NCF2    | NA | Inverse variance weighted | 4  | 0.107  | 0.140 | 4.457E-01 | 0.973 | pan | Severe COVID-19 |
| 15367_38  | LPLC1                   | BPI fold-containing family B member 1                                                | Q8TDL5 | BP1F81  | NA | Inverse variance weighted | 15 | 0.035  | 0.046 | 4.459E-01 | 0.973 | pan | Severe COVID-19 |
| 12573_80  | TRIM3                   | Tripartite motif-containing protein 3                                                | Q75382 | TRIM3   | NA | Wald ratio                | 1  | -0.187 | 0.246 | 4.460E-01 | 0.973 | pan | Severe COVID-19 |
| 13122_19  | FLRT2                   | Leucine-rich repeat transmembrane protein FLRT2                                      | Q43155 | FLRT2   | NA | Inverse variance weighted | 7  | 0.037  | 0.048 | 4.461E-01 | 0.973 | pan | Severe COVID-19 |
| 4158_54   | uPA                     | Urokinase-type plasminogen activator                                                 | P00749 | PLAU    | NA | Inverse variance weighted | 11 | 0.053  | 0.070 | 4.467E-01 | 0.973 | pan | Severe COVID-19 |
| 4499_21   | PDGF-AA                 | Platelet-derived growth factor subunit A                                             | P04085 | PDGFA   | NA | Inverse variance weighted | 3  | -0.134 | 0.177 | 4.473E-01 | 0.973 | pan | Severe COVID-19 |
| 16317_20  | Desmoglein-3            | Desmoglein-3                                                                         | P32926 | DSG3    | NA | Inverse variance weighted | 2  | 0.199  | 0.262 | 4.474E-01 | 0.973 | pan | Severe COVID-19 |
| 4455_89   | MFGM                    | Lactadherin                                                                          | Q08431 | MFG8    | NA | Inverse variance weighted | 4  | -0.010 | 0.013 | 4.479E-01 | 0.973 | pan | Severe COVID-19 |
| 4314_12   | XTP3A                   | dCTP pyrophosphatase 1                                                               | Q9H773 | DCPPP1  | NA | Wald ratio                | 1  | 0.142  | 0.187 | 4.486E-01 | 0.973 | pan | Severe COVID-19 |
| 11440_58  | SOC3                    | Suppressor of cytokine signaling 3                                                   | Q14543 | SOC53   | NA | Inverse variance weighted | 9  | 0.032  | 0.042 | 4.488E-01 | 0.973 | pan | Severe COVID-19 |
| 15468_14  | FHR1                    | Complement factor H-related protein 1                                                | Q03591 | CFHR1   | NA | Inverse variance weighted | 10 | 0.067  | 0.088 | 4.491E-01 | 0.973 | pan | Severe COVID-19 |
| 13499_30  | Coagulation Factor VIII | Coagulation Factor VIII                                                              | P00451 | F8      | NA | Inverse variance weighted | 6  | 0.089  | 0.117 | 4.492E-01 | 0.973 | pan | Severe COVID-19 |
| 15494_11  | FGFP1                   | Fibroblast growth factor-binding protein 1                                           | Q14512 | FGFBP1  | NA | Inverse variance weighted | 2  | 0.141  | 0.187 | 4.495E-01 | 0.973 | pan | Severe COVID-19 |
| 7875_86   | PLEK                    | Pleckstrin                                                                           | P08567 | PLEK    | NA | Inverse variance weighted | 2  | -0.094 | 0.124 | 4.502E-01 | 0.973 | pan | Severe COVID-19 |
| 10442_2   | TM190                   | Transmembrane protein 190                                                            | Q8WZ59 | TMEM190 | NA | Inverse variance weighted | 8  | -0.020 | 0.027 | 4.503E-01 | 0.973 | pan | Severe COVID-19 |
| 19553_14  | STX1a                   | Syntaxin-1A                                                                          | Q16623 | STX1A   | NA | Inverse variance weighted | 4  | 0.108  | 0.143 | 4.520E-01 | 0.973 | pan | Severe COVID-19 |
| 19254_125 | GMPR1                   | GMP reductase 1                                                                      | P36959 | GMPR    | NA | Inverse variance weighted | 15 | -0.027 | 0.036 | 4.525E-01 | 0.973 | pan | Severe COVID-19 |
| 6544_33   | NELL1                   | Protein kinase C-binding protein NELL1                                               | Q92832 | NELL1   | NA | Inverse variance weighted | 21 | -0.043 | 0.057 | 4.527E-01 | 0.973 | pan | Severe COVID-19 |
| 8013_9    | LMA2L                   | VIP36-like protein                                                                   | Q9H0V9 | LMAN2L  | NA | Inverse variance weighted | 2  | -0.120 | 0.160 | 4.528E-01 | 0.973 | pan | Severe COVID-19 |
| 5644_60   | RNA54                   | Ribonuclease 4                                                                       | P34096 | RNA54   | NA | Inverse variance weighted | 5  | 0.054  | 0.072 | 4.528E-01 | 0.973 | pan | Severe COVID-19 |
| 11319_106 | MRE11                   | Double-strand break repair protein MRE11                                             | P49959 | MRE11   | NA | Wald ratio                | 1  | -0.219 | 0.292 | 4.528E-01 | 0.973 | pan | Severe COVID-19 |
| 5532_53   | bFGF-R                  | Fibroblast growth factor receptor 1                                                  | P11362 | FGFR1   | NA | Inverse variance weighted | 5  | 0.090  | 0.120 | 4.530E-01 | 0.973 | pan | Severe COVID-19 |
| 8376_25   | LSHB                    | Lutropin subunit beta                                                                | P01229 | LHB     | NA | Inverse variance weighted | 4  | 0.055  | 0.073 | 4.544E-01 | 0.973 | pan | Severe COVID-19 |
| 12686_15  | THTM                    | 3-mercaptopyruvate sulfurtransferase                                                 | P25325 | MPST    | NA | Inverse variance weighted | 2  | -0.162 | 0.217 | 4.556E-01 | 0.973 | pan | Severe COVID-19 |
| 16781_2   | ENASE                   | Cytosolic endo-beta-N-acetylglucosaminidase                                          | Q8NF13 | ENGASE  | NA | Inverse variance weighted | 11 | 0.022  | 0.030 | 4.557E-01 | 0.973 | pan | Severe COVID-19 |
| 4534_10   | BSSP4                   | Brain-specific serine protease 4                                                     | Q9GZN4 | PRSS22  | NA | Inverse variance weighted | 4  | -0.050 | 0.068 | 4.562E-01 | 0.973 | pan | Severe COVID-19 |
| 9126_171  | NT5D3                   | 5'-nucleotidase domain-containing protein 3                                          | Q86UY8 | NT5DC3  | NA | Inverse variance weighted | 3  | 0.051  | 0.068 | 4.575E-01 | 0.973 | pan | Severe COVID-19 |
| 5663_18   | PF4V                    | Platelet factor 4 variant                                                            | P10720 | PF4V1   | NA | Inverse variance weighted | 2  | -0.200 | 0.269 | 4.578E-01 | 0.973 | pan | Severe COVID-19 |
| 6440_31   | MFAP5                   | Microfibrillar-associated protein 5                                                  | Q13361 | MFAP5   | NA | Inverse variance weighted | 3  | -0.235 | 0.317 | 4.586E-01 | 0.973 | pan | Severe COVID-19 |
| 4546_27   | EMR2                    | Adhesion G protein-coupled receptor E2                                               | Q9UHX3 | ADGRE2  | NA | Inverse variance weighted | 6  | 0.040  | 0.054 | 4.589E-01 | 0.973 | pan | Severe COVID-19 |
| 6572_10   | LRRT4:ECD               | Leucine-rich repeat transmembrane neuronal protein 4:Isoform 2, Extracellular domain | Q86VH4 | LRRTM4  | NA | Wald ratio                | 1  | -0.233 | 0.315 | 4.590E-01 | 0.973 | pan | Severe COVID-19 |
| 5491_12   | Testican-2              | Testican-2                                                                           | Q92563 | SPOCK2  | NA | Inverse variance weighted | 13 | -0.039 | 0.053 | 4.597E-01 | 0.973 | pan | Severe COVID-19 |
| 18301_10  | NAIF1                   | Nuclear apoptosis-inducing factor 1                                                  | Q69Y17 | NAIF1   | NA | Inverse variance weighted | 3  | -0.133 | 0.180 | 4.599E-01 | 0.973 | pan | Severe COVID-19 |
| 9805_51   | SEM4B                   | Semaphorin-4B                                                                        | Q9NPR2 | SEMA4B  | NA | Wald ratio                | 1  | -0.198 | 0.268 | 4.601E-01 | 0.973 | pan | Severe COVID-19 |
| 15506_34  | LRP12                   | Low-density lipoprotein receptor-related protein 12                                  | Q9YS61 | LRP12   | NA | Wald ratio                | 1  | 0.220  | 0.299 | 4.603E-01 | 0.973 | pan | Severe COVID-19 |
| 14318_1   | VPS29                   | Vacuolar protein sorting-associated protein 29                                       | Q9UBQ0 | VPS29   | NA | Inverse variance weighted | 2  | 0.188  | 0.255 | 4.608E-01 | 0.973 | pan | Severe COVID-19 |
| 14628_72  | FBX3                    | F-box only protein 3                                                                 | Q9UK99 | FBX03   | NA | Wald ratio                | 1  | -0.472 | 0.641 | 4.608E-01 | 0.973 | pan | Severe COVID-19 |
| 15604_18  | JNK2                    | Mitogen-activated protein kinase 9                                                   | P45984 | MAPK9   | NA | Inverse variance weighted | 2  | -0.105 | 0.143 | 4.625E-01 | 0.973 | pan | Severe COVID-19 |
| 17787_1   | Enoyl-CoA hydratase     | Enoyl-CoA hydratase, mitochondrial                                                   | P30084 | ECHS1   | NA | Wald ratio                | 1  | -0.207 | 0.282 | 4.626E-01 | 0.973 | pan | Severe COVID-19 |
| 6518_85   | ghrelin                 | Appetite-regulating hormone                                                          | Q9UBU3 | GHRL    | NA | Inverse variance weighted | 3  | -0.089 | 0.121 | 4.632E-01 | 0.973 | pan | Severe COVID-19 |
| 18397_5   | AK1C4                   | Aldo-keto reductase family 1 member C4                                               | P17516 | AKR1C4  | NA | Inverse variance weighted | 11 | 0.037  | 0.050 | 4.645E-01 | 0.973 | pan | Severe COVID-19 |
| 3890_8    | LDH-H 1                 | L-lactate dehydrogenase B chain                                                      | P07195 | LDHB    | NA | Wald ratio                | 1  | 0.312  | 0.427 | 4.651E-01 | 0.973 | pan | Severe COVID-19 |
| 18877_15  | CNN2                    | Calponin-2                                                                           | Q99439 | CNN2    | NA | Inverse variance weighted | 2  | -0.121 | 0.166 | 4.653E-01 | 0.973 | pan | Severe COVID-19 |

|           |                                     |                                                                                             |        |           |    |                           |    |        |       |           |       |     |                 |
|-----------|-------------------------------------|---------------------------------------------------------------------------------------------|--------|-----------|----|---------------------------|----|--------|-------|-----------|-------|-----|-----------------|
| 6576_1    | ART4                                | Ecto-ADP-ribosyltransferase 4                                                               | Q93070 | ART4      | NA | Inverse variance weighted | 10 | 0.020  | 0.028 | 4.657E-01 | 0.973 | pan | Severe COVID-19 |
| 9266_1    | sTREM-1                             | Triggering receptor expressed on myeloid cells 1                                            | Q9NP99 | TREM1     | NA | Inverse variance weighted | 7  | 0.080  | 0.110 | 4.657E-01 | 0.973 | pan | Severe COVID-19 |
| 12494_99  | GBRL2                               | Gamma-aminobutyric acid receptor-associated protein-like 2                                  | P60520 | GABARAPL2 | NA | Inverse variance weighted | 2  | 0.302  | 0.415 | 4.671E-01 | 0.973 | pan | Severe COVID-19 |
| 4437_56   | ENTP5                               | Ectonucleoside triphosphate diphosphohydrolase 5                                            | Q75356 | ENTPD5    | NA | Inverse variance weighted | 9  | 0.024  | 0.033 | 4.672E-01 | 0.973 | pan | Severe COVID-19 |
| 3803_10   | CYTD                                | Cystatin-D                                                                                  | P28325 | CST5      | NA | Inverse variance weighted | 17 | 0.038  | 0.053 | 4.681E-01 | 0.973 | pan | Severe COVID-19 |
| 10603_1   | HIS3                                | Histatin-3                                                                                  | P15516 | HTN3      | NA | Inverse variance weighted | 12 | 0.050  | 0.069 | 4.683E-01 | 0.973 | pan | Severe COVID-19 |
| 5456_59   | CNDP1                               | Beta-Ala-His dipeptidase                                                                    | Q96KN2 | CNDP1     | NA | Inverse variance weighted | 12 | -0.025 | 0.035 | 4.688E-01 | 0.973 | pan | Severe COVID-19 |
| 8352_26   | SIG12:lg-like C2-type 2             | Sialic acid-binding lg-like lectin 12:lg-like C2-type 2 domain, Isoform short               | Q96PQ1 | SIGLEC12  | NA | Wald ratio                | 1  | 0.257  | 0.354 | 4.689E-01 | 0.973 | pan | Severe COVID-19 |
| 15582_25  | FCN1                                | Ficolin-1                                                                                   | O00602 | FCN1      | NA | Inverse variance weighted | 4  | 0.080  | 0.111 | 4.692E-01 | 0.973 | pan | Severe COVID-19 |
| 17224_12  | MIME                                | Mimcan                                                                                      | P20774 | OGN       | NA | Inverse variance weighted | 6  | -0.099 | 0.137 | 4.692E-01 | 0.973 | pan | Severe COVID-19 |
| 5112_73   | OX2G                                | OX-2 membrane glycoprotein                                                                  | P41217 | CD200     | NA | Wald ratio                | 1  | -0.137 | 0.190 | 4.693E-01 | 0.973 | pan | Severe COVID-19 |
| 10908_2   | GLT13                               | Polypeptide N-acetylgalactosaminyltransferase 13                                            | Q8IUC8 | GALNT13   | NA | Wald ratio                | 1  | -0.245 | 0.340 | 4.697E-01 | 0.973 | pan | Severe COVID-19 |
| 5861_78   | 3HAO                                | 3-hydroxyanthranilate 3,4-dioxygenase                                                       | P46952 | HAAO      | NA | Inverse variance weighted | 6  | -0.096 | 0.133 | 4.701E-01 | 0.973 | pan | Severe COVID-19 |
| 3605_77   | MASP3:Light                         | Mannan-binding lectin serine protease 1:Mannan-binding lectin serine protease 1 light chain | P48740 | MASP1     | NA | Wald ratio                | 1  | -0.205 | 0.285 | 4.712E-01 | 0.973 | pan | Severe COVID-19 |
| 9275_2    | Siglec-5                            | Sialic acid-binding lg-like lectin 5                                                        | O15389 | SIGLEC5   | NA | Inverse variance weighted | 4  | -0.130 | 0.181 | 4.716E-01 | 0.973 | pan | Severe COVID-19 |
| 7959_34   | CADH7                               | Cadherin-7                                                                                  | Q9ULB5 | CDH7      | NA | Inverse variance weighted | 6  | -0.095 | 0.132 | 4.722E-01 | 0.973 | pan | Severe COVID-19 |
| 3066_12   | Galectin-3                          | Galectin-3                                                                                  | P17931 | LGALS3    | NA | Inverse variance weighted | 6  | -0.031 | 0.044 | 4.723E-01 | 0.973 | pan | Severe COVID-19 |
| 9233_71   | TFPI -2                             | Tissue factor pathway inhibitor 2                                                           | P48307 | TFPI2     | NA | Inverse variance weighted | 2  | -0.151 | 0.210 | 4.723E-01 | 0.973 | pan | Severe COVID-19 |
| 17398_55  | HO-1                                | Heme oxygenase 1                                                                            | P09601 | HMOX1     | NA | Inverse variance weighted | 10 | -0.058 | 0.081 | 4.732E-01 | 0.973 | pan | Severe COVID-19 |
| 9398_30   | GALP                                | Galanin-like peptide                                                                        | Q9UBC7 | GALP      | NA | Wald ratio                | 1  | -0.171 | 0.239 | 4.746E-01 | 0.973 | pan | Severe COVID-19 |
| 5605_77   | MFNG                                | Beta-1,3-N-acetylglucosaminyltransferase manic fringe                                       | O00587 | MFNG      | NA | Inverse variance weighted | 2  | -0.128 | 0.180 | 4.757E-01 | 0.973 | pan | Severe COVID-19 |
| 12630_8   | ARFP2                               | Arfrip2-2                                                                                   | P53365 | ARFP2     | NA | Inverse variance weighted | 5  | 0.092  | 0.129 | 4.758E-01 | 0.973 | pan | Severe COVID-19 |
| 11288_26  | 5NTC                                | Cytosolic purine 5'-nucleotidase                                                            | P49902 | NT5C2     | NA | Inverse variance weighted | 3  | -0.109 | 0.153 | 4.761E-01 | 0.973 | pan | Severe COVID-19 |
| 15325_14  | NEUM                                | Neuromodulin                                                                                | P17677 | GAP43     | NA | Wald ratio                | 1  | -0.153 | 0.215 | 4.771E-01 | 0.973 | pan | Severe COVID-19 |
| 10512_13  | IL3RB:ECD                           | Cytokine receptor common subunit beta:Extracellular domain                                  | P32927 | CSF2RB    | NA | Inverse variance weighted | 6  | -0.022 | 0.031 | 4.781E-01 | 0.973 | pan | Severe COVID-19 |
| 4923_79   | MIS                                 | Muellerian-inhibiting factor                                                                | P03971 | AMH       | NA | Inverse variance weighted | 5  | 0.088  | 0.124 | 4.783E-01 | 0.973 | pan | Severe COVID-19 |
| 2831_29   | Kallikrein 11                       | Kallikrein-11                                                                               | Q9UBX7 | KLK11     | NA | Inverse variance weighted | 7  | 0.059  | 0.083 | 4.795E-01 | 0.973 | pan | Severe COVID-19 |
| 3820_68   | MAPK2                               | MAP kinase-activated protein kinase 2                                                       | P49137 | MAPKAPK2  | NA | Wald ratio                | 1  | -0.101 | 0.143 | 4.796E-01 | 0.973 | pan | Severe COVID-19 |
| 8382_47   | MAPK5                               | MAP kinase-activated protein kinase 5                                                       | Q8IW41 | MAPKAPK5  | NA | Inverse variance weighted | 12 | -0.049 | 0.069 | 4.799E-01 | 0.973 | pan | Severe COVID-19 |
| 19272_9   | PEF1                                | Peflin                                                                                      | Q9UBV8 | PEF1      | NA | Inverse variance weighted | 10 | 0.031  | 0.044 | 4.803E-01 | 0.973 | pan | Severe COVID-19 |
| 8288_27   | b2-Glycoprotein I                   | Beta-2-glycoprotein 1                                                                       | P02749 | APOH      | NA | Inverse variance weighted | 6  | 0.030  | 0.043 | 4.809E-01 | 0.973 | pan | Severe COVID-19 |
| 9595_11   | B4GT2                               | Beta-1,4-galactosyltransferase 2                                                            | O60909 | B4GALT2   | NA | Inverse variance weighted | 4  | -0.055 | 0.078 | 4.816E-01 | 0.973 | pan | Severe COVID-19 |
| 5012_67   | Myokine, human                      | Adenylate kinase isoenzyme 1                                                                | P00568 | AK1       | NA | Wald ratio                | 1  | -0.249 | 0.355 | 4.822E-01 | 0.973 | pan | Severe COVID-19 |
| 9832_33   | HGD                                 | Homogentisate 1,2-dioxygenase                                                               | Q93099 | HGD       | NA | Inverse variance weighted | 2  | -0.092 | 0.131 | 4.826E-01 | 0.973 | pan | Severe COVID-19 |
| 7997_118  | DOC2B                               | Double C2-like domain-containing protein beta                                               | Q14184 | DOC2B     | NA | Wald ratio                | 1  | -0.245 | 0.350 | 4.830E-01 | 0.973 | pan | Severe COVID-19 |
| 11219_95  | FGFP3                               | Fibroblast growth factor-binding protein 3                                                  | Q8TAT2 | FGFBP3    | NA | Inverse variance weighted | 3  | 0.063  | 0.089 | 4.831E-01 | 0.973 | pan | Severe COVID-19 |
| 18916_25  | Inosine triphosphatase              | Inosine triphosphate pyrophosphatase                                                        | Q9BY32 | ITPA      | NA | Inverse variance weighted | 11 | 0.021  | 0.030 | 4.832E-01 | 0.973 | pan | Severe COVID-19 |
| 17802_4   | SIAS                                | Sialic acid synthase                                                                        | Q9NR45 | NANS      | NA | Wald ratio                | 1  | 0.122  | 0.174 | 4.833E-01 | 0.973 | pan | Severe COVID-19 |
| 8303_102  | MYG1                                | UPF0160 protein MYG1, mitochondrial                                                         | Q9HB07 | MYG1      | NA | Wald ratio                | 1  | 0.205  | 0.293 | 4.835E-01 | 0.973 | pan | Severe COVID-19 |
| 8299_66   | LIRA4                               | Leukocyte immunoglobulin-like receptor subfamily A member 4                                 | P59901 | LILRA4    | NA | Inverse variance weighted | 7  | 0.091  | 0.130 | 4.840E-01 | 0.973 | pan | Severe COVID-19 |
| 8956_96   | SREC-II:ECD                         | Scavenger receptor class F member 2:Extracellular domain                                    | Q96P96 | SCARF2    | NA | Inverse variance weighted | 2  | 0.092  | 0.132 | 4.852E-01 | 0.973 | pan | Severe COVID-19 |
| 19496_1   | NPL                                 | N-acetylneuraminate lyase                                                                   | Q9BXD5 | NPL       | NA | Inverse variance weighted | 4  | -0.059 | 0.085 | 4.853E-01 | 0.973 | pan | Severe COVID-19 |
| 8839_4    | Metaxin-2                           | Metaxin-2                                                                                   | O75431 | MTX2      | NA | Wald ratio                | 1  | -0.209 | 0.300 | 4.865E-01 | 0.973 | pan | Severe COVID-19 |
| 8908_14   | KCE1L:CD                            | Potassium voltage-gated channel subfamily E regulatory beta subunit 5:Cytoplasmic domain    | Q9UI90 | KCNB5     | NA | Inverse variance weighted | 3  | 0.193  | 0.278 | 4.870E-01 | 0.973 | pan | Severe COVID-19 |
| 5487_7    | SLAF7                               | SLAM family member 7                                                                        | Q9NQ25 | SLAMF7    | NA | Inverse variance weighted | 14 | 0.027  | 0.039 | 4.870E-01 | 0.973 | pan | Severe COVID-19 |
| 4925_54   | MMP-13                              | Collagenase 3                                                                               | P45452 | MMP13     | NA | Inverse variance weighted | 2  | 0.161  | 0.232 | 4.870E-01 | 0.973 | pan | Severe COVID-19 |
| 5957_30   | Somatostatin-28                     | Somatostatin-28                                                                             | P61278 | SST       | NA | Wald ratio                | 1  | 0.209  | 0.300 | 4.874E-01 | 0.973 | pan | Severe COVID-19 |
| 18206_18  | ADH6                                | Alcohol dehydrogenase 6                                                                     | P28332 | ADH6      | NA | Inverse variance weighted | 2  | -0.182 | 0.262 | 4.876E-01 | 0.973 | pan | Severe COVID-19 |
| 3343_1    | Aminoacylase-1                      | Aminoacylase-1                                                                              | Q03154 | ACY1      | NA | Inverse variance weighted | 3  | 0.109  | 0.157 | 4.877E-01 | 0.973 | pan | Severe COVID-19 |
| 10621_26  | PRR16                               | Protein Largen                                                                              | Q569H4 | PRR16     | NA | Inverse variance weighted | 4  | 0.117  | 0.168 | 4.878E-01 | 0.973 | pan | Severe COVID-19 |
| 8244_16   | FUT8                                | Alpha-(1,6)-fucosyltransferase                                                              | Q9BVC5 | FUT8      | NA | Inverse variance weighted | 19 | -0.037 | 0.053 | 4.885E-01 | 0.973 | pan | Severe COVID-19 |
| 18839_24  | Thyroglobulin                       | Thyroglobulin                                                                               | P01266 | TG        | NA | Inverse variance weighted | 6  | -0.063 | 0.091 | 4.885E-01 | 0.973 | pan | Severe COVID-19 |
| 2647_66   | Rab GDP dissociation inhibitor beta | Rab GDP dissociation inhibitor beta                                                         | P50395 | GDI2      | NA | Wald ratio                | 1  | -0.107 | 0.154 | 4.889E-01 | 0.973 | pan | Severe COVID-19 |
| 17403_14  | acyl-Coenzyme A dehydrogenase       | Short/branched chain specific acyl-CoA dehydrogenase, mitochondrial                         | P45954 | ACADSB    | NA | Inverse variance weighted | 4  | 0.085  | 0.124 | 4.899E-01 | 0.973 | pan | Severe COVID-19 |
| 18413_24  | ARL4D                               | ADP-ribosylation factor-like protein 4D                                                     | P49703 | ARL4D     | NA | Wald ratio                | 1  | 0.193  | 0.279 | 4.899E-01 | 0.973 | pan | Severe COVID-19 |
| 15305_7   | Secretagogin                        | Secretagogin                                                                                | O76038 | SCGN      | NA | Inverse variance weighted | 2  | 0.201  | 0.292 | 4.912E-01 | 0.973 | pan | Severe COVID-19 |
| 3296_92   | CNTN2                               | Contactin-2                                                                                 | Q02246 | CNTN2     | NA | Inverse variance weighted | 9  | -0.020 | 0.029 | 4.913E-01 | 0.973 | pan | Severe COVID-19 |
| 18878_15  | GREM1                               | Gremlin-1                                                                                   | O60565 | GREM1     | NA | Inverse variance weighted | 10 | -0.023 | 0.034 | 4.916E-01 | 0.973 | pan | Severe COVID-19 |
| 4154_57   | P-Selectin                          | P-selectin                                                                                  | P16109 | SELP      | NA | Inverse variance weighted | 4  | 0.068  | 0.099 | 4.936E-01 | 0.973 | pan | Severe COVID-19 |
| 5092_51   | JAG1:ECD                            | Protein jagged-1:Extracellular domain                                                       | P78504 | JAG1      | NA | Wald ratio                | 1  | -0.200 | 0.292 | 4.936E-01 | 0.973 | pan | Severe COVID-19 |
| 3235_50   | WFKN2                               | WAP, Kazal, immunoglobulin, Kunitz and NTR domain-containing protein 2                      | Q8TEU8 | WFIKN2    | NA | Inverse variance weighted | 8  | 0.027  | 0.040 | 4.939E-01 | 0.973 | pan | Severe COVID-19 |
| 18832_65  | SAA2                                | Serum amyloid A-2 protein                                                                   | P0DJI9 | SAA2      | NA | Inverse variance weighted | 3  | -0.231 | 0.337 | 4.940E-01 | 0.973 | pan | Severe COVID-19 |
| 5656_53   | PP11                                | Poly(U)-specific endoribonuclease                                                           | P21128 | ENDOU     | NA | Wald ratio                | 1  | -0.166 | 0.244 | 4.945E-01 | 0.973 | pan | Severe COVID-19 |
| 4906_35   | Coagulation Factor V                | Coagulation Factor V                                                                        | P12259 | F5        | NA | Inverse variance weighted | 3  | 0.116  | 0.170 | 4.947E-01 | 0.973 | pan | Severe COVID-19 |
| 11351_233 | NHEJ1                               | Non-homologous end-joining factor 1                                                         | Q9H9Q4 | NHEJ1     | NA | Inverse variance weighted | 3  | -0.107 | 0.157 | 4.957E-01 | 0.973 | pan | Severe COVID-19 |
| 15471_29  | LIPR2                               | Pancreatic lipase-related protein 2                                                         | P54317 | PNLIPRP2  | NA | Inverse variance weighted | 14 | -0.015 | 0.022 | 4.958E-01 | 0.973 | pan | Severe COVID-19 |
| 9574_11   | BIN1                                | Myc box-dependent-interacting protein 1                                                     | O00499 | BIN1      | NA | Inverse variance weighted | 2  | -0.072 | 0.105 | 4.958E-01 | 0.973 | pan | Severe COVID-19 |
| 4151_6    | Plasminogen                         | Plasminogen                                                                                 | P00747 | PLG       | NA | Inverse variance weighted | 5  | -0.124 | 0.182 | 4.961E-01 | 0.973 | pan | Severe COVID-19 |
| 12560_9   | NTSC                                | 5'(3')-deoxynucleotidase, cytosolic type                                                    | Q8TCDS | NTSC      | NA | Inverse variance weighted | 5  | 0.026  | 0.038 | 4.973E-01 | 0.973 | pan | Severe COVID-19 |
| 17781_191 | MLP3A                               | Microtubule-associated proteins 1A/1B light chain 3A                                        | Q9H492 | MAP1LC3A  | NA | Inverse variance weighted | 8  | 0.088  | 0.130 | 4.979E-01 | 0.973 | pan | Severe COVID-19 |
| 10070_22  | PLCG2                               | 1-phosphatidylinositol 4,5-bisphosphate phosphodiesterase gamma-2                           | P16885 | PLCG2     | NA | Inverse variance weighted | 2  | 0.168  | 0.249 | 4.988E-01 | 0.973 | pan | Severe COVID-19 |
| 4842_62   | Glypican 3                          | Glypican-3                                                                                  | P51654 | GPC3      | NA | Inverse variance weighted | 4  | -0.118 | 0.175 | 4.995E-01 | 0.973 | pan | Severe COVID-19 |
| 14133_93  | IL-1 sRII                           | Interleukin-1 receptor type 2                                                               | P27930 | IL1R2     | NA | Inverse variance weighted | 12 | 0.039  | 0.057 | 4.996E-01 | 0.973 | pan | Severe COVID-19 |
| 3805_16   | Endocan                             | Endothelial cell-specific molecule 1                                                        | Q9NQ30 | ESM1      | NA | Inverse variance weighted | 5  | -0.067 | 0.100 | 4.997E-01 | 0.973 | pan | Severe COVID-19 |
| 15584_9   | FHR2                                | Complement factor H-related protein 2                                                       | P36980 | CFHR2     | NA | Inverse variance weighted | 16 | -0.028 | 0.041 | 4.997E-01 | 0.973 | pan | Severe COVID-19 |
| 5593_11   | PDIAS                               | Protein disulfide-isomerase A5                                                              | Q14554 | PDIAS     | NA | Inverse variance weighted | 11 | -0.034 | 0.051 | 4.999E-01 | 0.973 | pan | Severe COVID-19 |
| 13518_5   | ASAP2                               | Arf-GAP with SH3 domain, ANK repeat and PH domain-containing protein 2                      | O43150 | ASAP2     | NA | Wald ratio                | 1  | -0.151 | 0.223 | 5.000E-01 | 0.973 | pan | Severe COVID-19 |
| 17175_5   | MP2K6                               | Dual specificity mitogen-activated protein kinase kinase 6                                  | P52564 | MAP2K6    | NA | Inverse variance weighted | 2  | 0.157  | 0.233 | 5.007E-01 | 0.973 | pan | Severe COVID-19 |

|           |                                  |                                                                                |        |           |    |                           |    |        |       |           |       |     |                 |
|-----------|----------------------------------|--------------------------------------------------------------------------------|--------|-----------|----|---------------------------|----|--------|-------|-----------|-------|-----|-----------------|
| 16908_5   | OMGP                             | Oligodendrocyte-myelin glycoprotein                                            | P23515 | OMG       | NA | Inverse variance weighted | 5  | 0.085  | 0.126 | 5.008E-01 | 0.973 | pan | Severe COVID-19 |
| 8327_26   | DPEP2                            | Dipeptidase 2                                                                  | Q9H4A9 | DPEP2     | NA | Inverse variance weighted | 6  | 0.049  | 0.073 | 5.018E-01 | 0.973 | pan | Severe COVID-19 |
| 9370_69   | GGH                              | Gamma-glutamyl hydrolase                                                       | Q92820 | GGH       | NA | Inverse variance weighted | 13 | -0.027 | 0.040 | 5.027E-01 | 0.973 | pan | Severe COVID-19 |
| 3495_15   | GCP-2                            | C-X-C motif chemokine 6                                                        | P80162 | CXCL6     | NA | Inverse variance weighted | 13 | -0.026 | 0.038 | 5.028E-01 | 0.973 | pan | Severe COVID-19 |
| 4141_79   | IP-10                            | C-X-C motif chemokine 10                                                       | P02778 | CXCL10    | NA | Inverse variance weighted | 2  | 0.190  | 0.284 | 5.032E-01 | 0.973 | pan | Severe COVID-19 |
| 4258_15   | PA2G4                            | Proliferation-associated protein 2G4                                           | Q9UQ80 | PA2G4     | NA | Wald ratio                | 1  | 0.173  | 0.259 | 5.045E-01 | 0.973 | pan | Severe COVID-19 |
| 13093_6   | SECTM1                           | Secreted and transmembrane protein 1                                           | Q8WVN6 | SECTM1    | NA | Inverse variance weighted | 2  | -0.089 | 0.133 | 5.045E-01 | 0.973 | pan | Severe COVID-19 |
| 3302_58   | CYTF                             | Cystatin-F                                                                     | Q76096 | CS77      | NA | Inverse variance weighted | 13 | 0.023  | 0.035 | 5.052E-01 | 0.973 | pan | Severe COVID-19 |
| 4969_2    | Carbonic anhydrase I             | Carbonic anhydrase 1                                                           | P00915 | CA1       | NA | Inverse variance weighted | 6  | -0.054 | 0.081 | 5.059E-01 | 0.973 | pan | Severe COVID-19 |
| 8033_1    | DJC18                            | Dnal homolog subfamily C member 18                                             | Q9H819 | DNAJC18   | NA | Wald ratio                | 1  | -0.181 | 0.272 | 5.062E-01 | 0.973 | pan | Severe COVID-19 |
| 13477_65  | LT4R1                            | Leukotriene B4 receptor 1                                                      | Q15722 | LTBR4     | NA | Inverse variance weighted | 2  | 0.114  | 0.171 | 5.063E-01 | 0.973 | pan | Severe COVID-19 |
| 12676_1   | PACN1                            | Protein kinase C and casein kinase substrate in neurons protein 1              | Q9BY11 | PACSN1    | NA | Inverse variance weighted | 2  | -0.077 | 0.116 | 5.069E-01 | 0.973 | pan | Severe COVID-19 |
| 5631_83   | MOTI                             | Promotilin                                                                     | P12872 | MLN       | NA | Inverse variance weighted | 26 | -0.025 | 0.038 | 5.071E-01 | 0.973 | pan | Severe COVID-19 |
| 14066_49  | MAGI2                            | Membrane-associated guanylate kinase, WW and PDZ domain-containing protein 2   | Q86UL8 | MAGI2     | NA | Inverse variance weighted | 10 | -0.021 | 0.032 | 5.073E-01 | 0.973 | pan | Severe COVID-19 |
| 12990_39  | MAP3K3                           | Mitogen-activated protein kinase kinase kinase 3                               | Q97959 | MAP3K3    | NA | Wald ratio                | 1  | 0.090  | 0.136 | 5.078E-01 | 0.973 | pan | Severe COVID-19 |
| 7916_10   | S100A7                           | Protein S100-A7                                                                | P31151 | S100A7    | NA | Inverse variance weighted | 16 | -0.020 | 0.030 | 5.097E-01 | 0.973 | pan | Severe COVID-19 |
| 4891_50   | Glucagon                         | Glucagon                                                                       | P01275 | GCG       | NA | Wald ratio                | 1  | 0.202  | 0.306 | 5.099E-01 | 0.973 | pan | Severe COVID-19 |
| 7015_8    | ILRB5                            | Leukocyte immunoglobulin-like receptor subfamily B member 5                    | Q75023 | LILRB5    | NA | Inverse variance weighted | 7  | 0.044  | 0.067 | 5.100E-01 | 0.973 | pan | Severe COVID-19 |
| 16818_200 | CDCP1                            | CUB domain-containing protein 1                                                | Q9HSV8 | CDCP1     | NA | Inverse variance weighted | 5  | -0.113 | 0.171 | 5.103E-01 | 0.973 | pan | Severe COVID-19 |
| 5087_5    | IL-22BP                          | Interleukin-22 receptor subunit alpha-2                                        | Q969J5 | IL22RA2   | NA | Inverse variance weighted | 20 | -0.033 | 0.051 | 5.103E-01 | 0.973 | pan | Severe COVID-19 |
| 5105_2    | Nogo Receptor                    | Reticulon-4 receptor                                                           | Q9BZ66 | RTN4R     | NA | Inverse variance weighted | 5  | -0.034 | 0.051 | 5.108E-01 | 0.973 | pan | Severe COVID-19 |
| 13740_51  | sFRP-3                           | Secreted frizzled-related protein 3                                            | Q92765 | FRZB      | NA | Inverse variance weighted | 10 | -0.020 | 0.030 | 5.110E-01 | 0.973 | pan | Severe COVID-19 |
| 19482_11  | HDHD3                            | Halooacid dehalogenase-like hydrolase domain-containing protein 3              | Q9BSH5 | HDHD3     | NA | Wald ratio                | 1  | 0.053  | 0.081 | 5.114E-01 | 0.973 | pan | Severe COVID-19 |
| 8005_1    | MXRA7                            | Matrix-remodeling-associated protein 7                                         | P84157 | MXRA7     | NA | Inverse variance weighted | 5  | -0.030 | 0.046 | 5.117E-01 | 0.973 | pan | Severe COVID-19 |
| 2999_6    | LSAMP                            | Limbic system-associated membrane protein                                      | Q13449 | LSAMP     | NA | Inverse variance weighted | 5  | 0.057  | 0.087 | 5.129E-01 | 0.973 | pan | Severe COVID-19 |
| 17773_26  | SNAG                             | Gamma-soluble NSF attachment protein                                           | Q99747 | NAPG      | NA | Wald ratio                | 1  | -0.167 | 0.255 | 5.129E-01 | 0.973 | pan | Severe COVID-19 |
| 15614_168 | ILRA2                            | Leukocyte immunoglobulin-like receptor subfamily A member 2                    | Q8N149 | ILRA2     | NA | Inverse variance weighted | 5  | -0.027 | 0.042 | 5.130E-01 | 0.973 | pan | Severe COVID-19 |
| 3391_10   | PK3CG                            | Phosphatidylinositol 4,5-bisphosphate 3-kinase catalytic subunit gamma isoform | P48736 | PIK3CG    | NA | Wald ratio                | 1  | -0.292 | 0.446 | 5.135E-01 | 0.973 | pan | Severe COVID-19 |
| 16913_8   | RNT2                             | Ribonuclease T2                                                                | Q00584 | RNASET2   | NA | Inverse variance weighted | 6  | 0.022  | 0.034 | 5.139E-01 | 0.973 | pan | Severe COVID-19 |
| 7905_30   | HPT                              | Haptoglobin isoform 2                                                          | P00738 | HP        | NA | Wald ratio                | 1  | -0.156 | 0.239 | 5.140E-01 | 0.973 | pan | Severe COVID-19 |
| 19193_18  | PF3D3                            | Prefoldin subunit 3                                                            | P61758 | VBP1      | NA | Inverse variance weighted | 12 | -0.077 | 0.118 | 5.144E-01 | 0.973 | pan | Severe COVID-19 |
| 17786_5   | GGPP5                            | Geranylgeranyl pyrophosphate synthase                                          | Q95749 | GGPS1     | NA | Wald ratio                | 1  | -0.110 | 0.169 | 5.146E-01 | 0.973 | pan | Severe COVID-19 |
| 3835_11   | TLR2                             | Toll-like receptor 2                                                           | O60603 | TLR2      | NA | Wald ratio                | 1  | -0.376 | 0.579 | 5.158E-01 | 0.973 | pan | Severe COVID-19 |
| 12637_7   | CACP                             | Carnitine O-acetyltransferase                                                  | P43155 | CRAT      | NA | Wald ratio                | 1  | 0.106  | 0.163 | 5.165E-01 | 0.973 | pan | Severe COVID-19 |
| 9506_10   | Apo L1                           | Apolipoprotein L1                                                              | O14791 | APOL1     | NA | Inverse variance weighted | 15 | -0.048 | 0.074 | 5.174E-01 | 0.973 | pan | Severe COVID-19 |
| 7779_86   | CHSTB                            | Carbohydrate sulfotransferase 11                                               | Q9NPF2 | CHST11    | NA | Inverse variance weighted | 5  | -0.039 | 0.060 | 5.176E-01 | 0.973 | pan | Severe COVID-19 |
| 14088_38  | IGFBP-6                          | Insulin-like growth factor-binding protein 6                                   | P24592 | IGFBP6    | NA | Inverse variance weighted | 2  | -0.111 | 0.172 | 5.177E-01 | 0.973 | pan | Severe COVID-19 |
| 17782_23  | THIK                             | 3-ketoacyl-CoA thiolase, peroxisomal                                           | P09110 | ACAA1     | NA | Inverse variance weighted | 8  | -0.032 | 0.050 | 5.183E-01 | 0.973 | pan | Severe COVID-19 |
| 5749_53   | COL                              | Colipase                                                                       | P04118 | CLPS      | NA | Inverse variance weighted | 8  | -0.025 | 0.038 | 5.187E-01 | 0.973 | pan | Severe COVID-19 |
| 9102_28   | ZFY27:CD region 2                | Protrudin: Cytoplasmic domain, region 2, isoform 5                             | Q5T4F4 | ZFYVE27   | NA | Wald ratio                | 1  | 0.163  | 0.253 | 5.194E-01 | 0.973 | pan | Severe COVID-19 |
| 2654_19   | TNF sR-I                         | Tumor necrosis factor receptor superfamily member 1A                           | P19438 | TNFRSF1A  | NA | Wald ratio                | 1  | -0.084 | 0.130 | 5.194E-01 | 0.973 | pan | Severe COVID-19 |
| 5611_56   | D108B                            | Beta-defensin 108B                                                             | Q8NET1 | DEFB108B  | NA | Wald ratio                | 1  | -0.245 | 0.380 | 5.197E-01 | 0.973 | pan | Severe COVID-19 |
| 5542_22   | NRP1                             | Neuropilin-1                                                                   | O14786 | NRP1      | NA | Inverse variance weighted | 8  | -0.032 | 0.049 | 5.200E-01 | 0.973 | pan | Severe COVID-19 |
| 6382_17   | MANBA                            | Beta-mannosidase                                                               | O00462 | MANBA     | NA | Inverse variance weighted | 8  | -0.035 | 0.054 | 5.200E-01 | 0.973 | pan | Severe COVID-19 |
| 18285_6   | SVIP                             | Small VCP/p97-interacting protein                                              | Q8NHG7 | SVIP      | NA | Inverse variance weighted | 2  | 0.319  | 0.496 | 5.200E-01 | 0.973 | pan | Severe COVID-19 |
| 7198_197  | FA20B                            | Glycosaminoglycan xylosylkinase                                                | Q75063 | FAM20B    | NA | Inverse variance weighted | 2  | 0.111  | 0.172 | 5.204E-01 | 0.973 | pan | Severe COVID-19 |
| 18235_16  | PGP                              | Glycerol-3-phosphate phosphatase                                               | A6NDG6 | PGP       | NA | Inverse variance weighted | 2  | 0.101  | 0.158 | 5.208E-01 | 0.973 | pan | Severe COVID-19 |
| 2813_11   | ART                              | Agouti-related protein                                                         | O00253 | AGRP      | NA | Inverse variance weighted | 5  | 0.109  | 0.171 | 5.214E-01 | 0.973 | pan | Severe COVID-19 |
| 19492_5   | KAAG1                            | Kidney-associated antigen 1                                                    | Q9UBP8 | KAAG1     | NA | Inverse variance weighted | 14 | -0.040 | 0.063 | 5.216E-01 | 0.973 | pan | Severe COVID-19 |
| 5231_79   | PCSK9                            | Proprotein convertase subtilisin/kexin type 9                                  | Q8NB97 | PCSK9     | NA | Inverse variance weighted | 5  | 0.042  | 0.066 | 5.220E-01 | 0.973 | pan | Severe COVID-19 |
| 8358_30   | Peroxisedoxin-3                  | Thioredoxin-dependent peroxide reductase, mitochondrial                        | P30048 | PRDX3     | NA | Wald ratio                | 1  | 0.202  | 0.316 | 5.220E-01 | 0.973 | pan | Severe COVID-19 |
| 10666_7   | GNPTG                            | N-acetylglucosamine-1-phosphotransferase subunit gamma                         | Q9UIJ9 | GNPTG     | NA | Inverse variance weighted | 4  | 0.048  | 0.076 | 5.222E-01 | 0.973 | pan | Severe COVID-19 |
| 7898_29   | MDM1                             | Nuclear protein MDM1                                                           | Q8TC05 | MDM1      | NA | Inverse variance weighted | 2  | -0.110 | 0.172 | 5.227E-01 | 0.973 | pan | Severe COVID-19 |
| 13056_18  | S6A16                            | Orphan sodium- and chloride-dependent neurotransmitter transporter NTT5        | Q9GZN6 | SLC6A16   | NA | Wald ratio                | 1  | -0.221 | 0.345 | 5.227E-01 | 0.973 | pan | Severe COVID-19 |
| 8233_2    | ITIH5                            | Inter-alpha-trypsin inhibitor heavy chain H5                                   | Q86UX2 | ITIH5     | NA | Inverse variance weighted | 10 | 0.030  | 0.047 | 5.235E-01 | 0.973 | pan | Severe COVID-19 |
| 2888_49   | C7                               | Complement component C7                                                        | P10643 | C7        | NA | Inverse variance weighted | 14 | -0.019 | 0.030 | 5.236E-01 | 0.973 | pan | Severe COVID-19 |
| 12731_12  | PKHA7                            | Pleckstrin homology domain-containing family A member 7                        | Q6IQ23 | PLEKHA7   | NA | Inverse variance weighted | 8  | -0.024 | 0.038 | 5.236E-01 | 0.973 | pan | Severe COVID-19 |
| 5636_10   | MFAF4                            | Microfibril-associated glycoprotein 4                                          | P55083 | MFAF4     | NA | Inverse variance weighted | 11 | 0.039  | 0.062 | 5.254E-01 | 0.973 | pan | Severe COVID-19 |
| 2991_9    | IL-1 sRI                         | Interleukin-1 receptor type 1                                                  | P14778 | IL1R1     | NA | Inverse variance weighted | 8  | -0.072 | 0.115 | 5.268E-01 | 0.973 | pan | Severe COVID-19 |
| 6252_62   | Secretoglobin family 3A member 1 | Secretoglobulin family 3A member 1                                             | Q96QR1 | SCGB3A1   | NA | Inverse variance weighted | 28 | 0.048  | 0.075 | 5.272E-01 | 0.973 | pan | Severe COVID-19 |
| 17396_23  | ADH1A                            | Alcohol dehydrogenase 1A                                                       | P07327 | ADH1A     | NA | Inverse variance weighted | 3  | -0.078 | 0.123 | 5.273E-01 | 0.973 | pan | Severe COVID-19 |
| 13697_51  | GPDA                             | Glycerol-3-phosphate dehydrogenase [NAD(+)], cytoplasmic                       | P21695 | GPD1      | NA | Wald ratio                | 1  | 0.206  | 0.326 | 5.275E-01 | 0.973 | pan | Severe COVID-19 |
| 8983_7    | GOLM1                            | Golgi membrane protein 1                                                       | Q8NB14 | GOLM1     | NA | Inverse variance weighted | 5  | 0.102  | 0.162 | 5.276E-01 | 0.973 | pan | Severe COVID-19 |
| 17370_186 | ABHDA                            | Mycophenolic acid acyl-glucuronide esterase, mitochondrial                     | Q9NUJ1 | ABHD10    | NA | Wald ratio                | 1  | -0.183 | 0.290 | 5.278E-01 | 0.973 | pan | Severe COVID-19 |
| 17738_7   | CRNN                             | Cornulin                                                                       | Q9UBG3 | CRNN      | NA | Wald ratio                | 1  | 0.105  | 0.167 | 5.281E-01 | 0.973 | pan | Severe COVID-19 |
| 3323_37   | LRP8                             | Low-density lipoprotein receptor-related protein 8                             | Q14114 | LRP8      | NA | Inverse variance weighted | 4  | 0.055  | 0.087 | 5.295E-01 | 0.973 | pan | Severe COVID-19 |
| 17758_79  | DCXR                             | L-xylulose reductase                                                           | Q7Z4W1 | DCXR      | NA | Inverse variance weighted | 2  | 0.098  | 0.156 | 5.299E-01 | 0.973 | pan | Severe COVID-19 |
| 6556_5    | ENPP5                            | Ectonucleotide pyrophosphatase/phosphodiesterase family member 5               | Q9UIA9 | ENPP5     | NA | Inverse variance weighted | 15 | -0.012 | 0.020 | 5.299E-01 | 0.973 | pan | Severe COVID-19 |
| 11161_5   | SPG20                            | Spartin                                                                        | Q8NOX7 | SPART     | NA | Wald ratio                | 1  | 0.200  | 0.320 | 5.308E-01 | 0.973 | pan | Severe COVID-19 |
| 18841_1   | SPB13                            | Serpin B13                                                                     | Q9UIV8 | SERPINB13 | NA | Inverse variance weighted | 4  | 0.064  | 0.102 | 5.308E-01 | 0.973 | pan | Severe COVID-19 |
| 15603_20  | Integrin alpha-2                 | Integrin alpha-2                                                               | P17301 | ITGA2     | NA | Inverse variance weighted | 2  | 0.117  | 0.187 | 5.317E-01 | 0.973 | pan | Severe COVID-19 |
| 19361_78  | MATN3                            | Matrilin-3                                                                     | O15232 | MATN3     | NA | Inverse variance weighted | 14 | 0.016  | 0.026 | 5.324E-01 | 0.973 | pan | Severe COVID-19 |
| 17856_23  | NTSM                             | 5'(3')-deoxyribonucleotidase, mitochondrial                                    | Q9NPB1 | NTSM      | NA | Inverse variance weighted | 2  | 0.089  | 0.143 | 5.324E-01 | 0.973 | pan | Severe COVID-19 |
| 16296_43  | LGR5                             | Leucine-rich repeat-containing G-protein coupled receptor 5                    | Q75473 | LGR5      | NA | Wald ratio                | 1  | -0.167 | 0.267 | 5.329E-01 | 0.973 | pan | Severe COVID-19 |
| 6234_74   | VITRN                            | Vitrin                                                                         | Q6UXI7 | VIT       | NA | Inverse variance weighted | 9  | 0.030  | 0.048 | 5.334E-01 | 0.973 | pan | Severe COVID-19 |
| 7935_26   | LARGE                            | Glycosyltransferase-like protein LARGE1                                        | Q95A61 | LARGE1    | NA | Inverse variance weighted | 7  | -0.069 | 0.112 | 5.352E-01 | 0.973 | pan | Severe COVID-19 |
| 14618_26  | ECOP                             | Vesicular, overexpressed in cancer, prosurvival protein 1                      | Q96AW1 | VOPPP1    | NA | Inverse variance weighted | 10 | -0.043 | 0.069 | 5.354E-01 | 0.973 | pan | Severe COVID-19 |
| 3045_72   | PTN                              | Pleiotrophin                                                                   | P21246 | PTN       | NA | Inverse variance weighted | 4  | -0.044 | 0.071 | 5.355E-01 | 0.973 | pan | Severe COVID-19 |



|           |                          |                                                                                    |        |          |    |                           |    |        |       |           |       |     |                 |
|-----------|--------------------------|------------------------------------------------------------------------------------|--------|----------|----|---------------------------|----|--------|-------|-----------|-------|-----|-----------------|
| 15391_114 | GAS-6                    | Growth arrest-specific protein 6                                                   | Q14393 | GAS6     | NA | Inverse variance weighted | 5  | 0.034  | 0.060 | 5.691E-01 | 0.974 | pan | Severe COVID-19 |
| 17327_3   | CNPY3                    | Protein canopy homolog 3                                                           | Q9BT09 | CNPY3    | NA | Inverse variance weighted | 2  | 0.081  | 0.143 | 5.707E-01 | 0.974 | pan | Severe COVID-19 |
| 18896_23  | H6ST3                    | Heparan-sulfate 6-O-sulfotransferase 3                                             | Q8IZP7 | H56ST3   | NA | Inverse variance weighted | 2  | 0.081  | 0.144 | 5.733E-01 | 0.974 | pan | Severe COVID-19 |
| 11311_79  | RAG-1                    | V(D)J recombination-activating protein 1                                           | P15918 | RAG1     | NA | Wald ratio                | 1  | -0.157 | 0.278 | 5.734E-01 | 0.974 | pan | Severe COVID-19 |
| 17148_7   | BLVRB                    | Flavin reductase (NADPH)                                                           | P30043 | BLVRB    | NA | Inverse variance weighted | 2  | -0.084 | 0.149 | 5.737E-01 | 0.974 | pan | Severe COVID-19 |
| 6612_90   | CP079                    | BRICHOS domain-containing protein 5                                                | Q6PL45 | BRIC05   | NA | Inverse variance weighted | 2  | 0.135  | 0.241 | 5.737E-01 | 0.974 | pan | Severe COVID-19 |
| 16882_27  | PHP14                    | 14 kDa phosphohistidine phosphatase                                                | Q9NRX4 | PHPT1    | NA | Inverse variance weighted | 2  | 0.132  | 0.235 | 5.740E-01 | 0.974 | pan | Severe COVID-19 |
| 2973_15   | CD36 ANTIGEN             | Platelet glycoprotein 4                                                            | P16671 | CD36     | NA | Inverse variance weighted | 8  | 0.037  | 0.065 | 5.743E-01 | 0.974 | pan | Severe COVID-19 |
| 9916_146  | LRG4B:ECD                | Leucine-rich repeat-containing protein 4B:Extracellular domain                     | Q9NT99 | LRRC4B   | NA | Inverse variance weighted | 2  | 0.125  | 0.222 | 5.743E-01 | 0.974 | pan | Severe COVID-19 |
| 2480_58   | TIMP-3                   | Metalloproteinase inhibitor 3                                                      | P35625 | TIMP3    | NA | Inverse variance weighted | 10 | 0.017  | 0.031 | 5.749E-01 | 0.974 | pan | Severe COVID-19 |
| 18289_16  | MIP-5                    | C-C motif chemokine 15                                                             | Q16663 | CCLL15   | NA | Inverse variance weighted | 9  | -0.048 | 0.085 | 5.754E-01 | 0.974 | pan | Severe COVID-19 |
| 9077_10   | MA1A2                    | Mannosyl-oligosaccharide 1,2-alpha-mannosidase IB                                  | O60476 | MAN1A2   | NA | Inverse variance weighted | 5  | -0.048 | 0.086 | 5.756E-01 | 0.974 | pan | Severe COVID-19 |
| 3396_54   | Renin                    | Renin                                                                              | P00797 | REN      | NA | Inverse variance weighted | 7  | -0.083 | 0.149 | 5.759E-01 | 0.974 | pan | Severe COVID-19 |
| 2968_61   | TNFSF15                  | Tumor necrosis factor ligand superfamily member 15                                 | O95150 | TNFSF15  | NA | Wald ratio                | 1  | -0.155 | 0.277 | 5.763E-01 | 0.974 | pan | Severe COVID-19 |
| 12401_3   | STALP                    | AMSH-like protease                                                                 | Q96FJ0 | STAMBP1  | NA | Wald ratio                | 1  | 0.089  | 0.159 | 5.764E-01 | 0.974 | pan | Severe COVID-19 |
| 18891_98  | GBP2                     | Guanylate-binding protein 2                                                        | P32456 | GBP2     | NA | Wald ratio                | 1  | -0.110 | 0.198 | 5.769E-01 | 0.974 | pan | Severe COVID-19 |
| 4989_7    | Fibrinogen g-chain dimer | Fibrinogen gamma chain                                                             | O20679 | FGG      | NA | Wald ratio                | 1  | 0.172  | 0.308 | 5.771E-01 | 0.974 | pan | Severe COVID-19 |
| 9849_13   | APEX1                    | DNA-(apurinic or apyrimidinic site) lyase                                          | P27695 | APEX1    | NA | Wald ratio                | 1  | -0.187 | 0.336 | 5.771E-01 | 0.974 | pan | Severe COVID-19 |
| 15585_304 | fibulin 5                | Fibulin-5                                                                          | Q9UBX5 | FBLN5    | NA | Wald ratio                | 1  | -0.102 | 0.183 | 5.772E-01 | 0.974 | pan | Severe COVID-19 |
| 11265_8   | Retinal dehydrogenase 1  | Retinal dehydrogenase 1                                                            | P00352 | ALDH1A1  | NA | Wald ratio                | 1  | 0.115  | 0.208 | 5.802E-01 | 0.974 | pan | Severe COVID-19 |
| 9769_48   | DNER:ECD                 | Delta and Notch-like epidermal growth factor-related receptor:Extracellular domain | Q8NF78 | DNER     | NA | Inverse variance weighted | 5  | -0.039 | 0.071 | 5.803E-01 | 0.974 | pan | Severe COVID-19 |
| 18921_30  | PHEX                     | Phosphate-regulating neutral endopeptidase                                         | P78562 | PHEX     | NA | Wald ratio                | 1  | -0.130 | 0.234 | 5.804E-01 | 0.974 | pan | Severe COVID-19 |
| 17682_1   | CD46                     | Membrane cofactor protein                                                          | P15529 | CD46     | NA | Inverse variance weighted | 3  | 0.088  | 0.159 | 5.808E-01 | 0.974 | pan | Severe COVID-19 |
| 2811_27   | Angiopietin-1            | Angiopietin-1                                                                      | Q15389 | ANGPT1   | NA | Inverse variance weighted | 2  | 0.099  | 0.179 | 5.809E-01 | 0.974 | pan | Severe COVID-19 |
| 4479_14   | C1-Esterase Inhibitor    | Plasma protease C1 inhibitor                                                       | P05155 | SERPINC1 | NA | Inverse variance weighted | 13 | -0.027 | 0.049 | 5.817E-01 | 0.974 | pan | Severe COVID-19 |
| 18185_118 | ALDOB                    | Fructose-bisphosphate aldolase B                                                   | P05062 | ALDOB    | NA | Inverse variance weighted | 3  | 0.043  | 0.078 | 5.818E-01 | 0.974 | pan | Severe COVID-19 |
| 15573_110 | CSPG3                    | Neurocan core protein                                                              | Q14594 | NCAN     | NA | Inverse variance weighted | 11 | -0.041 | 0.074 | 5.824E-01 | 0.974 | pan | Severe COVID-19 |
| 3773_15   | sTie-2                   | Angiopietin-1 receptor, soluble                                                    | Q02763 | TEK      | NA | Inverse variance weighted | 5  | -0.053 | 0.097 | 5.837E-01 | 0.974 | pan | Severe COVID-19 |
| 11390_24  | Carbonic Anhydrase VIII  | Carbonic anhydrase-related protein                                                 | P35219 | CA8      | NA | Inverse variance weighted | 7  | -0.019 | 0.036 | 5.854E-01 | 0.974 | pan | Severe COVID-19 |
| 8040_9    | LEMD1                    | LEM domain-containing protein 1                                                    | Q68G75 | LEMD1    | NA | Wald ratio                | 1  | -0.101 | 0.186 | 5.856E-01 | 0.974 | pan | Severe COVID-19 |
| 18342_2   | SERC                     | Phosphoserine aminotransferase                                                     | Q9Y617 | PSAT1    | NA | Inverse variance weighted | 2  | -0.153 | 0.280 | 5.864E-01 | 0.974 | pan | Severe COVID-19 |
| 19296_51  | MLRA                     | Myosin regulatory light chain 2, atrial isoform                                    | Q01449 | MYL7     | NA | Inverse variance weighted | 6  | -0.066 | 0.122 | 5.878E-01 | 0.974 | pan | Severe COVID-19 |
| 7194_36   | NPTN                     | Neuropilin                                                                         | Q9Y639 | NPTN     | NA | Inverse variance weighted | 2  | 0.117  | 0.216 | 5.886E-01 | 0.974 | pan | Severe COVID-19 |
| 4156_74   | TGF-β2                   | Transforming growth factor beta-2                                                  | P61812 | TGFβ2    | NA | Wald ratio                | 1  | -0.170 | 0.314 | 5.890E-01 | 0.974 | pan | Severe COVID-19 |
| 3299_29   | Contactin-5              | Contactin-5                                                                        | O94779 | CNTN5    | NA | Inverse variance weighted | 4  | -0.040 | 0.074 | 5.890E-01 | 0.974 | pan | Severe COVID-19 |
| 17151_84  | IRF-3                    | Interferon regulatory factor 3                                                     | Q14653 | IRF3     | NA | Wald ratio                | 1  | -0.108 | 0.201 | 5.907E-01 | 0.974 | pan | Severe COVID-19 |
| 8894_80   | hnRNP A/B                | Heterogeneous nuclear ribonucleoprotein A/B                                        | Q99729 | HNRNPAB  | NA | Inverse variance weighted | 2  | 0.142  | 0.265 | 5.911E-01 | 0.974 | pan | Severe COVID-19 |
| 7956_11   | MOS1                     | MICOS complex subunit MIC10                                                        | Q5TG20 | MICOS10  | NA | Inverse variance weighted | 12 | 0.006  | 0.011 | 5.911E-01 | 0.974 | pan | Severe COVID-19 |
| 13465_5   | CCP1                     | Calciopressin-1                                                                    | P53805 | RCAN1    | NA | Wald ratio                | 1  | 0.137  | 0.257 | 5.926E-01 | 0.974 | pan | Severe COVID-19 |
| 16606_85  | Aldose reductase         | Aldose reductase                                                                   | P15121 | AKR1B1   | NA | Inverse variance weighted | 2  | -0.066 | 0.124 | 5.941E-01 | 0.974 | pan | Severe COVID-19 |
| 11709_29  | CPT1B                    | Carnitine O-palmitoyltransferase 1, muscle isoform                                 | Q92523 | CPT1B    | NA | Wald ratio                | 1  | 0.131  | 0.246 | 5.946E-01 | 0.974 | pan | Severe COVID-19 |
| 8229_1    | GXL1T                    | Glucoside xylosyltransferase 1                                                     | Q4G148 | GXYLT1   | NA | Inverse variance weighted | 11 | -0.027 | 0.050 | 5.948E-01 | 0.974 | pan | Severe COVID-19 |
| 8394_56   | RNase 2                  | Non-secretory ribonuclease                                                         | P10153 | RNASE2   | NA | Wald ratio                | 1  | -0.136 | 0.257 | 5.969E-01 | 0.974 | pan | Severe COVID-19 |
| 15509_2   | NAG                      | Alpha-N-acetylglucosaminidase                                                      | P54802 | NAGLU    | NA | Inverse variance weighted | 28 | 0.013  | 0.025 | 5.969E-01 | 0.974 | pan | Severe COVID-19 |
| 19223_6   | RAB1A                    | Ras-related protein Rab-1A                                                         | P62820 | RAB1A    | NA | Inverse variance weighted | 2  | -0.121 | 0.229 | 5.970E-01 | 0.974 | pan | Severe COVID-19 |
| 17820_170 | MLF1                     | Myeloid leukemia factor 1                                                          | P58340 | MLF1     | NA | Inverse variance weighted | 4  | -0.077 | 0.146 | 5.974E-01 | 0.974 | pan | Severe COVID-19 |
| 5089_11   | IL-7 Ra                  | Interleukin-7 receptor subunit alpha                                               | P16871 | IL7R     | NA | Wald ratio                | 1  | 0.095  | 0.179 | 5.977E-01 | 0.974 | pan | Severe COVID-19 |
| 3593_72   | Caspase-3                | Caspase-3                                                                          | P42574 | CASP3    | NA | Wald ratio                | 1  | 0.082  | 0.157 | 5.997E-01 | 0.974 | pan | Severe COVID-19 |
| 3132_1    | VEGF-C                   | Vascular endothelial growth factor C                                               | P49767 | VEGFC    | NA | Wald ratio                | 1  | -0.098 | 0.186 | 5.999E-01 | 0.974 | pan | Severe COVID-19 |
| 11615_16  | DAPP1                    | Dual adapter for phosphotyrosine and 3-phosphotyrosine and 3-phosphoinositide      | Q9UN19 | DAPP1    | NA | Inverse variance weighted | 2  | 0.103  | 0.196 | 6.000E-01 | 0.974 | pan | Severe COVID-19 |
| 10574_10  | b2-Microglobulin         | Beta-2-microglobulin                                                               | P61769 | B2M      | NA | Inverse variance weighted | 8  | -0.032 | 0.060 | 6.004E-01 | 0.974 | pan | Severe COVID-19 |
| 9350_3    | FSTL4                    | Follistatin-related protein 4                                                      | Q6MZW2 | FSTL4    | NA | Inverse variance weighted | 2  | 0.100  | 0.190 | 6.006E-01 | 0.974 | pan | Severe COVID-19 |
| 17698_15  | WBP2                     | VW domain-binding protein 2                                                        | Q96979 | WBP2     | NA | Wald ratio                | 1  | -0.246 | 0.470 | 6.011E-01 | 0.974 | pan | Severe COVID-19 |
| 5798_3    | BID                      | BH3-interacting domain death agonist                                               | P55957 | BID      | NA | Wald ratio                | 1  | 0.098  | 0.188 | 6.011E-01 | 0.974 | pan | Severe COVID-19 |
| 14623_26  | SUMO3                    | Small ubiquitin-related modifier 3                                                 | P55854 | SUMO3    | NA | Wald ratio                | 1  | 0.182  | 0.350 | 6.029E-01 | 0.974 | pan | Severe COVID-19 |
| 3050_7    | vWF                      | von Willebrand factor                                                              | P04275 | VWF      | NA | Inverse variance weighted | 3  | -0.111 | 0.215 | 6.034E-01 | 0.974 | pan | Severe COVID-19 |
| 15579_26  | ENPP6                    | Ectonucleotide pyrophosphatase/phosphodiesterase family member 6                   | Q6UWR7 | ENPP6    | NA | Inverse variance weighted | 2  | 0.101  | 0.194 | 6.035E-01 | 0.974 | pan | Severe COVID-19 |
| 4126_22   | BPI                      | Bactericidal permeability-increasing protein                                       | P17213 | BPI      | NA | Inverse variance weighted | 13 | -0.037 | 0.072 | 6.035E-01 | 0.974 | pan | Severe COVID-19 |
| 5646_20   | RNASE6                   | Ribonuclease K6                                                                    | Q93091 | RNASE6   | NA | Inverse variance weighted | 5  | -0.016 | 0.030 | 6.053E-01 | 0.974 | pan | Severe COVID-19 |
| 5000_52   | LG3BP                    | Galectin-3-binding protein                                                         | Q08380 | LGALS3BP | NA | Inverse variance weighted | 10 | -0.034 | 0.067 | 6.054E-01 | 0.974 | pan | Severe COVID-19 |
| 3651_50   | VEGF sr2                 | Vascular endothelial growth factor receptor 2                                      | P35968 | KDR      | NA | Inverse variance weighted | 9  | -0.019 | 0.037 | 6.057E-01 | 0.974 | pan | Severe COVID-19 |
| 8900_28   | NEO1                     | Neogenin                                                                           | Q92859 | NEO1     | NA | Inverse variance weighted | 4  | -0.037 | 0.072 | 6.058E-01 | 0.974 | pan | Severe COVID-19 |
| 10082_251 | NFL                      | Neurofilament light polypeptide                                                    | P07196 | NEFL     | NA | Inverse variance weighted | 3  | -0.210 | 0.407 | 6.064E-01 | 0.974 | pan | Severe COVID-19 |
| 4240_31   | M2-PK                    | Pyruvate kinase PKM                                                                | P14618 | PKM      | NA | Inverse variance weighted | 3  | -0.095 | 0.184 | 6.066E-01 | 0.974 | pan | Severe COVID-19 |
| 8310_6    | U773                     | Zymogen granule protein 16 homolog B                                               | Q96DA0 | ZG16B    | NA | Wald ratio                | 1  | 0.049  | 0.095 | 6.068E-01 | 0.974 | pan | Severe COVID-19 |
| 8982_65   | TSP3                     | Thrombospondin-3                                                                   | P49746 | THBS3    | NA | Inverse variance weighted | 4  | -0.092 | 0.179 | 6.069E-01 | 0.974 | pan | Severe COVID-19 |
| 15324_58  | Ferritin light chain     | Ferritin light chain                                                               | P02792 | FTL      | NA | Inverse variance weighted | 4  | 0.080  | 0.155 | 6.075E-01 | 0.974 | pan | Severe COVID-19 |
| 9026_40   | BTNL8                    | Butyrophilin-like protein 8                                                        | Q6UX41 | BTNL8    | NA | Inverse variance weighted | 2  | -0.047 | 0.092 | 6.075E-01 | 0.974 | pan | Severe COVID-19 |
| 2827_23   | Fractalkine/CX3CL-1      | Fractalkine                                                                        | P78423 | CX3CL1   | NA | Wald ratio                | 1  | -0.083 | 0.161 | 6.079E-01 | 0.974 | pan | Severe COVID-19 |
| 10041_3   | HNFA4                    | Hepatocyte nuclear factor 4-alpha                                                  | P41235 | HNFA4    | NA | Wald ratio                | 1  | -0.161 | 0.314 | 6.079E-01 | 0.974 | pan | Severe COVID-19 |
| 9772_153  | NLGN2:ECD                | Neurologin 2:Extracellular domain                                                  | Q8NF24 | NLGN2    | NA | Inverse variance weighted | 2  | 0.060  | 0.117 | 6.090E-01 | 0.974 | pan | Severe COVID-19 |
| 16060_99  | NID2                     | Nidogen-2                                                                          | Q14112 | NID2     | NA | Inverse variance weighted | 9  | 0.019  | 0.037 | 6.094E-01 | 0.974 | pan | Severe COVID-19 |
| 4979_34   | DERM                     | Dermatopontin                                                                      | Q07507 | DPT      | NA | Inverse variance weighted | 7  | 0.022  | 0.042 | 6.096E-01 | 0.974 | pan | Severe COVID-19 |
| 3169_70   | IDUA                     | Alpha-L-iduronidase                                                                | P35475 | IDUA     | NA | Inverse variance weighted | 6  | 0.025  | 0.049 | 6.102E-01 | 0.974 | pan | Severe COVID-19 |
| 12786_61  | GDE5                     | Glycerophosphocholine phosphodiesterase GPCPD1                                     | Q9NP88 | GPCPD1   | NA | Inverse variance weighted | 2  | 0.090  | 0.176 | 6.102E-01 | 0.974 | pan | Severe COVID-19 |
| 9348_1    | C1RL1                    | Complement C1r subcomponent-like protein                                           | Q9NZP8 | C1RL     | NA | Inverse variance weighted | 2  | 0.101  | 0.199 | 6.102E-01 | 0.974 | pan | Severe COVID-19 |
| 12813_18  | EHBP1                    | EH domain-binding protein 1                                                        | Q8ND11 | EHBP1    | NA | Wald ratio                | 1  | -0.155 | 0.303 | 6.102E-01 | 0.974 | pan | Severe COVID-19 |
| 9316_67   | WFDC1                    | WAP four-disulfide core domain protein 1                                           | Q9HC57 | WFDC1    | NA | Inverse variance weighted | 5  | 0.021  | 0.041 | 6.102E-01 | 0.974 | pan | Severe COVID-19 |

|           |                                  |                                                                        |                 |                 |    |                           |    |        |       |           |       |     |                 |
|-----------|----------------------------------|------------------------------------------------------------------------|-----------------|-----------------|----|---------------------------|----|--------|-------|-----------|-------|-----|-----------------|
| 13374_4   | DB113                            | Beta-defensin 113                                                      | Q30KQ7          | DEFB113         | NA | Wald ratio                | 1  | 0.166  | 0.326 | 6.103E-01 | 0.974 | pan | Severe COVID-19 |
| 19523_215 | PARK7                            | Protein DJ-1                                                           | Q99497          | PARK7           | NA | Wald ratio                | 1  | 0.083  | 0.162 | 6.107E-01 | 0.974 | pan | Severe COVID-19 |
| 11098_1   | PDXK                             | Pyridoxal kinase                                                       | O00764          | PDXK            | NA | Inverse variance weighted | 4  | 0.075  | 0.147 | 6.111E-01 | 0.974 | pan | Severe COVID-19 |
| 10916_44  | PLA2R1                           | Secretory phospholipase A2 receptor                                    | Q13018          | PLA2R1          | NA | Inverse variance weighted | 18 | -0.018 | 0.036 | 6.116E-01 | 0.974 | pan | Severe COVID-19 |
| 3151_6    | IL-2 sRa                         | Interleukin-2 receptor subunit alpha                                   | P01589          | IL2RA           | NA | Wald ratio                | 1  | 0.084  | 0.165 | 6.117E-01 | 0.974 | pan | Severe COVID-19 |
| 12633_3   | PTN9                             | Tyrosine-protein phosphatase non-receptor type 9                       | P43378          | PTPN9           | NA | Wald ratio                | 1  | -0.132 | 0.261 | 6.119E-01 | 0.974 | pan | Severe COVID-19 |
| 11211_7   | TBCE                             | Tubulin-specific chaperone E                                           | Q15813          | TBCE            | NA | Inverse variance weighted | 2  | -0.163 | 0.322 | 6.128E-01 | 0.974 | pan | Severe COVID-19 |
| 3474_19   | Thrombospondin-1                 | Thrombospondin-1                                                       | P07996          | THBS1           | NA | Wald ratio                | 1  | 0.158  | 0.312 | 6.131E-01 | 0.974 | pan | Severe COVID-19 |
| 15475_4   | PLTP                             | Phospholipid transfer protein                                          | P55058          | PLTP            | NA | Inverse variance weighted | 11 | -0.039 | 0.077 | 6.131E-01 | 0.974 | pan | Severe COVID-19 |
| 4328_2    | BOC                              | Brother of CDO                                                         | Q9BWW1          | BOC             | NA | Inverse variance weighted | 4  | -0.033 | 0.065 | 6.133E-01 | 0.974 | pan | Severe COVID-19 |
| 17837_5   | CLIC2                            | Chloride intracellular channel protein 2                               | O15247          | CLIC2           | NA | Wald ratio                | 1  | -0.158 | 0.313 | 6.134E-01 | 0.974 | pan | Severe COVID-19 |
| 11287_14  | Cytochrome b5                    | Cytochrome b5                                                          | P00167          | CYB5A           | NA | Wald ratio                | 1  | 0.194  | 0.384 | 6.139E-01 | 0.974 | pan | Severe COVID-19 |
| 4996_66   | HRG                              | Histidine-rich glycoprotein                                            | P04196          | HRG             | NA | Inverse variance weighted | 7  | -0.043 | 0.085 | 6.140E-01 | 0.974 | pan | Severe COVID-19 |
| 8250_2    | PTPRJ                            | Receptor-type tyrosine-protein phosphatase eta                         | Q12913          | PTPRJ           | NA | Inverse variance weighted | 8  | -0.046 | 0.092 | 6.142E-01 | 0.974 | pan | Severe COVID-19 |
| 19615_213 | 5NT3                             | Cytosolic 5'-nucleotidase 3A                                           | Q9H0P0          | NT5C3A          | NA | Wald ratio                | 1  | 0.111  | 0.221 | 6.144E-01 | 0.974 | pan | Severe COVID-19 |
| 9863_1    | Tropomyosin 4                    | Tropomyosin alpha-4 chain                                              | P67936          | TPM4            | NA | Wald ratio                | 1  | 0.101  | 0.200 | 6.151E-01 | 0.974 | pan | Severe COVID-19 |
| 6521_35   | NPTX2                            | Neuronal pentraxin-2                                                   | P47972          | NPTX2           | NA | Inverse variance weighted | 3  | 0.103  | 0.206 | 6.161E-01 | 0.974 | pan | Severe COVID-19 |
| 4929_55   | SHBG                             | Sex hormone-binding globulin                                           | P04278          | SHBG            | NA | Inverse variance weighted | 5  | 0.065  | 0.131 | 6.181E-01 | 0.974 | pan | Severe COVID-19 |
| 7989_5    | CA226                            | Uncharacterized protein C1orf226                                       | A11170          | C1orf226        | NA | Wald ratio                | 1  | 0.125  | 0.252 | 6.185E-01 | 0.974 | pan | Severe COVID-19 |
| 13516_46  | TMM85                            | ER membrane protein complex subunit 4                                  | Q5J8M3          | EMC4            | NA | Inverse variance weighted | 7  | -0.014 | 0.028 | 6.194E-01 | 0.974 | pan | Severe COVID-19 |
| 16079_2   | TEC                              | Tyrosine-protein kinase Tec                                            | P42680          | TEC             | NA | Inverse variance weighted | 2  | 0.060  | 0.122 | 6.200E-01 | 0.974 | pan | Severe COVID-19 |
| 7788_1    | CF6                              | ATP synthase-coupling factor 6, mitochondrial                          | P18859          | ATP5PF          | NA | Wald ratio                | 1  | 0.122  | 0.246 | 6.213E-01 | 0.974 | pan | Severe COVID-19 |
| 9883_29   | Glyoxalase I                     | Lactoylglutathione lyase                                               | Q04760          | GLO1            | NA | Inverse variance weighted | 2  | 0.064  | 0.129 | 6.213E-01 | 0.974 | pan | Severe COVID-19 |
| 18882_7   | CSTN2                            | Calsyntenin-2                                                          | Q9H4D0          | CLSTN2          | NA | Inverse variance weighted | 10 | -0.030 | 0.061 | 6.224E-01 | 0.974 | pan | Severe COVID-19 |
| 10903_50  | STX8                             | Syntaxin-8                                                             | Q9UNK0          | STX8            | NA | Wald ratio                | 1  | 0.118  | 0.241 | 6.233E-01 | 0.974 | pan | Severe COVID-19 |
| 12743_18  | BAG5                             | BAG family molecular chaperone regulator 5                             | Q9UL15          | BAG5            | NA | Wald ratio                | 1  | 0.193  | 0.393 | 6.236E-01 | 0.974 | pan | Severe COVID-19 |
| 13545_97  | E1F1A                            | Probable RNA-binding protein E1F1AD                                    | Q8N9N8          | E1F1AD          | NA | Inverse variance weighted | 3  | 0.084  | 0.172 | 6.238E-01 | 0.974 | pan | Severe COVID-19 |
| 10835_25  | AAGCT                            | Alpha-1,4-N-acetylglucosaminyltransferase                              | Q9UNA3          | AAGNT           | NA | Wald ratio                | 1  | -0.114 | 0.232 | 6.238E-01 | 0.974 | pan | Severe COVID-19 |
| 13384_110 | FUMH                             | Fumarate hydratase, mitochondrial                                      | P07954          | FH              | NA | Inverse variance weighted | 2  | 0.173  | 0.353 | 6.242E-01 | 0.974 | pan | Severe COVID-19 |
| 18220_141 | SRA1                             | Steroid receptor RNA activator 1                                       | Q9HD15          | SRA1            | NA | Inverse variance weighted | 2  | -0.087 | 0.178 | 6.251E-01 | 0.974 | pan | Severe COVID-19 |
| 3035_80   | IL-19                            | Interleukin-19                                                         | Q9UHD0          | IL19            | NA | Inverse variance weighted | 5  | -0.053 | 0.109 | 6.251E-01 | 0.974 | pan | Severe COVID-19 |
| 4153_11   | alpha-1-antichymotrypsin complex | Alpha-1-antichymotrypsin complex                                       | P07288   P01011 | KLK3   SERPINA3 | NA | Inverse variance weighted | 3  | -0.071 | 0.146 | 6.260E-01 | 0.974 | pan | Severe COVID-19 |
| 6442_6    | BAGE3                            | B melanoma antigen 3                                                   | Q86Y29          | BAGE3           | NA | Wald ratio                | 1  | -0.177 | 0.364 | 6.265E-01 | 0.974 | pan | Severe COVID-19 |
| 7127_3    | Apo A-II                         | Apolipoprotein A-II                                                    | P02652          | APOA2           | NA | Inverse variance weighted | 11 | 0.038  | 0.078 | 6.268E-01 | 0.974 | pan | Severe COVID-19 |
| 18242_8   | Sperm protein 17                 | Sperm surface protein Sp17                                             | Q15506          | SPA17           | NA | Wald ratio                | 1  | -0.215 | 0.443 | 6.270E-01 | 0.974 | pan | Severe COVID-19 |
| 15516_12  | SAA-4                            | Serum amyloid A-4 protein                                              | P35542          | SAA4            | NA | Inverse variance weighted | 7  | -0.024 | 0.050 | 6.272E-01 | 0.974 | pan | Severe COVID-19 |
| 19323_1   | RCA51                            | Receptor-binding cancer antigen expressed on SiSo cells                | O00559          | EBA69           | NA | Inverse variance weighted | 3  | -0.094 | 0.194 | 6.285E-01 | 0.974 | pan | Severe COVID-19 |
| 4459_68   | PCSK7                            | Proprotein convertase subtilisin/kexin type 7                          | Q16549          | PCSK7           | NA | Inverse variance weighted | 14 | 0.017  | 0.035 | 6.288E-01 | 0.974 | pan | Severe COVID-19 |
| 9369_174  | NGL1                             | Leucine-rich repeat-containing protein 4C                              | Q9HCJ2          | LRRAC4          | NA | Inverse variance weighted | 4  | 0.051  | 0.105 | 6.290E-01 | 0.974 | pan | Severe COVID-19 |
| 13692_154 | WISP-1                           | WNT1-inducible-signaling pathway protein 1                             | Q95388          | CN4A            | NA | Inverse variance weighted | 12 | 0.014  | 0.030 | 6.294E-01 | 0.974 | pan | Severe COVID-19 |
| 8088_56   | CA210                            | Type III endosome membrane protein TEMP                                | Q8IVY1          | C1orf210        | NA | Wald ratio                | 1  | -0.178 | 0.370 | 6.302E-01 | 0.974 | pan | Severe COVID-19 |
| 8994_65   | SLAMF8                           | SLAM family member 8                                                   | Q9P0V8          | SLAMF8          | NA | Inverse variance weighted | 4  | -0.097 | 0.202 | 6.304E-01 | 0.974 | pan | Severe COVID-19 |
| 14747_9   | CRLF1                            | Cytokine receptor-like factor 1                                        | O75462          | CRLF1           | NA | Inverse variance weighted | 2  | -0.036 | 0.075 | 6.304E-01 | 0.974 | pan | Severe COVID-19 |
| 13944_3   | SULT 1A3                         | Sulfotransferase 1A3                                                   | P0DMM9          | SULT1A3         | NA | Inverse variance weighted | 6  | -0.063 | 0.131 | 6.305E-01 | 0.974 | pan | Severe COVID-19 |
| 3580_25   | a1-Antitrypsin                   | Alpha-1-antitrypsin                                                    | P01009          | SERPINA1        | NA | Inverse variance weighted | 6  | 0.042  | 0.088 | 6.307E-01 | 0.974 | pan | Severe COVID-19 |
| 9326_33   | ITI heavy chain H2               | Inter-alpha-trypsin inhibitor heavy chain H2                           | P19823          | ITI1H           | NA | Inverse variance weighted | 10 | 0.029  | 0.061 | 6.308E-01 | 0.974 | pan | Severe COVID-19 |
| 8480_29   | FBLN3                            | EGF-containing fibulin-like extracellular matrix protein 1             | Q12805          | EFEMP1          | NA | Inverse variance weighted | 3  | -0.051 | 0.106 | 6.309E-01 | 0.974 | pan | Severe COVID-19 |
| 3293_2    | CD5L                             | CD5 antigen-like                                                       | O43866          | CD5L            | NA | Inverse variance weighted | 8  | -0.036 | 0.076 | 6.314E-01 | 0.974 | pan | Severe COVID-19 |
| 2972_57   | BMP-7                            | Bone morphogenetic protein 7                                           | P18075          | BMP7            | NA | Wald ratio                | 1  | -0.153 | 0.320 | 6.320E-01 | 0.974 | pan | Severe COVID-19 |
| 16015_19  | ALT                              | Alanine aminotransferase 1                                             | P24298          | GPT             | NA | Wald ratio                | 1  | -0.134 | 0.281 | 6.320E-01 | 0.974 | pan | Severe COVID-19 |
| 17170_15  | CALCB                            | Calcitonin gene-related peptide 2                                      | P10092          | CALCB           | NA | Inverse variance weighted | 2  | -0.037 | 0.077 | 6.321E-01 | 0.974 | pan | Severe COVID-19 |
| 2780_35   | Lactoferrin                      | Lactotransferrin                                                       | P02788          | LTF             | NA | Inverse variance weighted | 2  | 0.098  | 0.204 | 6.324E-01 | 0.974 | pan | Severe COVID-19 |
| 18299_13  | CPNS1                            | Calpain small subunit 1                                                | P04632          | CAPNS1          | NA | Inverse variance weighted | 4  | -0.048 | 0.100 | 6.325E-01 | 0.974 | pan | Severe COVID-19 |
| 2579_17   | MMP-9                            | Matrix metalloproteinase-9                                             | P14780          | MMP9            | NA | Inverse variance weighted | 6  | 0.070  | 0.146 | 6.338E-01 | 0.974 | pan | Severe COVID-19 |
| 13463_1   | PXDN                             | Peroxidasin homolog                                                    | Q92626          | PXDN            | NA | Inverse variance weighted | 4  | 0.047  | 0.098 | 6.339E-01 | 0.974 | pan | Severe COVID-19 |
| 3041_55   | MRC2                             | C-type mannose receptor 2                                              | Q9UBG0          | MRC2            | NA | Inverse variance weighted | 5  | -0.049 | 0.104 | 6.369E-01 | 0.974 | pan | Severe COVID-19 |
| 13948_50  | GABR2:ECD                        | Gamma-aminobutyric acid type B receptor subunit 2:Extracellular domain | Q75899          | GABBR2          | NA | Wald ratio                | 1  | 0.129  | 0.274 | 6.371E-01 | 0.974 | pan | Severe COVID-19 |
| 7953_20   | SLAF1                            | Signaling lymphocytic activation molecule                              | Q13291          | SLAMF1          | NA | Wald ratio                | 1  | 0.125  | 0.266 | 6.379E-01 | 0.974 | pan | Severe COVID-19 |
| 11547_84  | MUSK                             | Muscle, skeletal receptor tyrosine-protein kinase                      | O15146          | MUSK            | NA | Inverse variance weighted | 2  | 0.228  | 0.486 | 6.383E-01 | 0.974 | pan | Severe COVID-19 |
| 12433_8   | ARL11                            | ADP-ribosylation factor-like protein 11                                | Q969Q4          | ARL11           | NA | Inverse variance weighted | 2  | -0.114 | 0.242 | 6.389E-01 | 0.974 | pan | Severe COVID-19 |
| 3216_2    | PIGR                             | Polymeric immunoglobulin receptor                                      | P01833          | PIGR            | NA | Inverse variance weighted | 4  | 0.069  | 0.147 | 6.396E-01 | 0.974 | pan | Severe COVID-19 |
| 8909_77   | GNP11                            | Glucosamine-6-phosphate isomerase 1                                    | P46926          | GNPDA1          | NA | Wald ratio                | 1  | 0.055  | 0.117 | 6.397E-01 | 0.974 | pan | Severe COVID-19 |
| 15427_35  | LOXL3                            | Lysyl oxidase homolog 3                                                | P58215          | LOXL3           | NA | Inverse variance weighted | 11 | 0.018  | 0.039 | 6.398E-01 | 0.974 | pan | Severe COVID-19 |
| 15491_20  | CD248                            | Endosialin                                                             | Q9HCU0          | CD248           | NA | Wald ratio                | 1  | 0.130  | 0.278 | 6.403E-01 | 0.974 | pan | Severe COVID-19 |
| 12436_84  | GST omega-1                      | Glutathione S-transferase omega-1                                      | P78417          | GSTO1           | NA | Inverse variance weighted | 17 | 0.014  | 0.030 | 6.407E-01 | 0.974 | pan | Severe COVID-19 |
| 8817_29   | CENPV                            | Centromere protein V                                                   | Q727K6          | CENPV           | NA | Wald ratio                | 1  | -0.180 | 0.385 | 6.411E-01 | 0.974 | pan | Severe COVID-19 |
| 12585_39  | ERCC1                            | DNA excision repair protein ERCC-1                                     | P07992          | ERCC1           | NA | Wald ratio                | 1  | 0.137  | 0.295 | 6.423E-01 | 0.974 | pan | Severe COVID-19 |
| 3898_5    | PSD7                             | 26S proteasome non-ATPase regulatory subunit 7                         | P51665          | PSMD07          | NA | Wald ratio                | 1  | -0.142 | 0.305 | 6.426E-01 | 0.974 | pan | Severe COVID-19 |
| 5581_28   | FGL1                             | Fibrinogen-like protein 1                                              | Q08830          | FGL1            | NA | Inverse variance weighted | 10 | 0.018  | 0.039 | 6.426E-01 | 0.974 | pan | Severe COVID-19 |
| 6641_60   | PolyUbiquitin K48                | PolyUbiquitin K48-linked                                               | P0CG47          | UBB             | NA | Wald ratio                | 1  | -0.136 | 0.294 | 6.428E-01 | 0.974 | pan | Severe COVID-19 |
| 13624_17  | NADK                             | NAD kinase                                                             | O95544          | NADK            | NA | Wald ratio                | 1  | 0.058  | 0.125 | 6.429E-01 | 0.974 | pan | Severe COVID-19 |
| 7227_75   | COCH                             | Cochlin                                                                | O43405          | COCH            | NA | Inverse variance weighted | 17 | -0.019 | 0.042 | 6.430E-01 | 0.974 | pan | Severe COVID-19 |
| 18918_86  | PDE4A                            | cAMP-specific 3',5'-cyclic phosphodiesterase 4A                        | P27815          | PDE4A           | NA | Inverse variance weighted | 4  | 0.068  | 0.147 | 6.432E-01 | 0.974 | pan | Severe COVID-19 |
| 17751_68  | CRBB1                            | Beta-crystallin B1                                                     | P53674          | CRYBB1          | NA | Inverse variance weighted | 3  | -0.039 | 0.084 | 6.435E-01 | 0.974 | pan | Severe COVID-19 |
| 7655_11   | N-terminal pro-BNP               | N-terminal pro-BNP                                                     | P16860          | NPPB            | NA | Inverse variance weighted | 4  | -0.042 | 0.091 | 6.441E-01 | 0.974 | pan | Severe COVID-19 |
| 9384_17   | Cathelicidin peptide             | Cathelicidin antimicrobial peptide                                     | P49913          | CAMP            | NA | Inverse variance weighted | 8  | 0.053  | 0.116 | 6.443E-01 | 0.974 | pan | Severe COVID-19 |
| 9459_7    | Fas, soluble                     | Tumor necrosis factor receptor superfamily member 6                    | P25445          | FAS             | NA | Inverse variance weighted | 2  | -0.129 | 0.278 | 6.444E-01 | 0.974 | pan | Severe COVID-19 |
| 12399_194 | CDS0                             | Coiled-coil domain-containing protein 50                               | Q8IVM0          | CCDC50          | NA | Inverse variance weighted | 2  | -0.167 | 0.361 | 6.445E-01 | 0.974 | pan | Severe COVID-19 |

|           |                               |                                                                               |        |          |    |                           |    |        |       |           |       |     |                 |
|-----------|-------------------------------|-------------------------------------------------------------------------------|--------|----------|----|---------------------------|----|--------|-------|-----------|-------|-----|-----------------|
| 11273_176 | GSTT2                         | Glutathione S-transferase theta-28                                            | P0CG30 | GSTT2B   | NA | Inverse variance weighted | 4  | 0.055  | 0.121 | 6.475E-01 | 0.974 | pan | Severe COVID-19 |
| 7192_37   | CRF2-12                       | Interferon lambda receptor 1                                                  | Q8IU57 | IFNLR1   | NA | Inverse variance weighted | 2  | -0.097 | 0.213 | 6.476E-01 | 0.974 | pan | Severe COVID-19 |
| 15447_45  | Sorbitol dehydrogenase        | Sorbitol dehydrogenase                                                        | Q00796 | SORD     | NA | Inverse variance weighted | 5  | -0.036 | 0.079 | 6.490E-01 | 0.974 | pan | Severe COVID-19 |
| 17785_11  | RCL                           | 2'-deoxynucleoside 5'-phosphate N-hydrolase 1                                 | O43598 | DNPH1    | NA | Wald ratio                | 1  | 0.120  | 0.263 | 6.490E-01 | 0.974 | pan | Severe COVID-19 |
| 2977_7    | EDAR                          | Tumor necrosis factor receptor superfamily member EDAR                        | Q9UNE0 | EDAR     | NA | Inverse variance weighted | 15 | -0.016 | 0.035 | 6.494E-01 | 0.974 | pan | Severe COVID-19 |
| 5852_6    | S100A12                       | Protein S100-A12                                                              | R80511 | S100A12  | NA | Inverse variance weighted | 2  | 0.060  | 0.131 | 6.505E-01 | 0.974 | pan | Severe COVID-19 |
| 2754_50   | C3                            | Complement C3                                                                 | P01024 | C3       | NA | Wald ratio                | 1  | 0.151  | 0.333 | 6.507E-01 | 0.974 | pan | Severe COVID-19 |
| 15499_11  | Attractin                     | Attractin                                                                     | O75882 | ATTRN    | NA | Inverse variance weighted | 5  | -0.038 | 0.085 | 6.508E-01 | 0.974 | pan | Severe COVID-19 |
| 17161_1   | OST48                         | Dolichyl-diphosphooligosaccharide--protein glycosyltransferase 48 kDa subunit | P39656 | DDOST    | NA | Inverse variance weighted | 2  | -0.074 | 0.163 | 6.508E-01 | 0.974 | pan | Severe COVID-19 |
| 14006_36  | GNMT                          | Glycine N-methyltransferase                                                   | Q14749 | GNMT     | NA | Inverse variance weighted | 3  | -0.059 | 0.130 | 6.509E-01 | 0.974 | pan | Severe COVID-19 |
| 4559_64   | KYNU                          | Kynureninase                                                                  | Q16719 | KYNU     | NA | Inverse variance weighted | 6  | -0.031 | 0.069 | 6.509E-01 | 0.974 | pan | Severe COVID-19 |
| 14662_6   | MZF1                          | Myeloid zinc finger 1                                                         | P28698 | MZF1     | NA | Wald ratio                | 1  | 0.090  | 0.200 | 6.512E-01 | 0.974 | pan | Severe COVID-19 |
| 15452_5   | 5'-Nucleotidase               | 5'-Nucleotidase                                                               | P21589 | NT5E     | NA | Inverse variance weighted | 3  | -0.019 | 0.042 | 6.513E-01 | 0.974 | pan | Severe COVID-19 |
| 9360_33   | EDIL3                         | EGF-like repeat and discoidin I-like domain-containing protein 3              | O43854 | EDIL3    | NA | Inverse variance weighted | 7  | -0.075 | 0.165 | 6.514E-01 | 0.974 | pan | Severe COVID-19 |
| 3173_49   | ASAH1                         | N-acyl ethanolamine-hydrolyzing acid amidase                                  | Q02083 | NAAA     | NA | Inverse variance weighted | 24 | -0.017 | 0.037 | 6.516E-01 | 0.974 | pan | Severe COVID-19 |
| 8841_65   | CILP2                         | Cartilage intermediate layer protein 2                                        | Q8IU18 | CILP2    | NA | Inverse variance weighted | 2  | 0.201  | 0.445 | 6.517E-01 | 0.974 | pan | Severe COVID-19 |
| 10938_13  | sLFA-3                        | Lymphocyte function-associated antigen 3                                      | P19256 | CD58     | NA | Inverse variance weighted | 2  | -0.086 | 0.191 | 6.527E-01 | 0.974 | pan | Severe COVID-19 |
| 13929_27  | OCTC                          | Peroxisomal carnitine O-octanoyltransferase                                   | Q9UKG9 | CROT     | NA | Inverse variance weighted | 9  | -0.021 | 0.046 | 6.529E-01 | 0.974 | pan | Severe COVID-19 |
| 17696_1   | TIRP                          | TIR domain-containing adapter molecule 2                                      | Q86X87 | TICAM2   | NA | Wald ratio                | 1  | 0.182  | 0.405 | 6.530E-01 | 0.974 | pan | Severe COVID-19 |
| 13717_15  | FCN2                          | Ficolin-2                                                                     | Q15485 | FCN2     | NA | Inverse variance weighted | 11 | 0.027  | 0.060 | 6.531E-01 | 0.974 | pan | Severe COVID-19 |
| 11277_23  | ATF6A                         | Cyclic AMP-dependent transcription factor ATF-6 alpha                         | P18850 | ATF6     | NA | Inverse variance weighted | 10 | -0.037 | 0.083 | 6.538E-01 | 0.974 | pan | Severe COVID-19 |
| 15343_337 | Kinogen, HMW, Two Chain       | Kinogen, HMW, Two Chain                                                       | P01042 | KNK1     | NA | Inverse variance weighted | 4  | -0.111 | 0.249 | 6.540E-01 | 0.974 | pan | Severe COVID-19 |
| 7841_84   | ESAM                          | Endothelial cell-selective adhesion molecule                                  | Q96A97 | ESAM     | NA | Inverse variance weighted | 6  | 0.026  | 0.059 | 6.558E-01 | 0.974 | pan | Severe COVID-19 |
| 3481_87   | XPNPEP1                       | Xaa-Pro aminopeptidase 1                                                      | Q9NQW7 | XPNPEP1  | NA | Wald ratio                | 1  | 0.140  | 0.315 | 6.560E-01 | 0.974 | pan | Severe COVID-19 |
| 5242_37   | MP2K4                         | Dual specificity mitogen-activated protein kinase kinase 4                    | P45985 | MAP2K4   | NA | Inverse variance weighted | 6  | 0.076  | 0.171 | 6.567E-01 | 0.974 | pan | Severe COVID-19 |
| 9175_48   | DSCAM                         | Down syndrome cell adhesion molecule                                          | O60469 | DSCAM    | NA | Inverse variance weighted | 2  | -0.045 | 0.101 | 6.576E-01 | 0.974 | pan | Severe COVID-19 |
| 11313_100 | PHS                           | Pterin-4-alpha-carbinolamine dehydratase                                      | P61457 | PCBD1    | NA | Inverse variance weighted | 6  | 0.034  | 0.078 | 6.578E-01 | 0.974 | pan | Severe COVID-19 |
| 17400_71  | ACOT8                         | Acyl-coenzyme A thioesterase 8                                                | O14734 | ACOT8    | NA | Wald ratio                | 1  | 0.229  | 0.517 | 6.578E-01 | 0.974 | pan | Severe COVID-19 |
| 4342_10   | sICAM-1                       | Intercellular adhesion molecule 1                                             | P05362 | ICAM1    | NA | Inverse variance weighted | 13 | 0.010  | 0.023 | 6.578E-01 | 0.974 | pan | Severe COVID-19 |
| 9513_9    | FGF22                         | Fibroblast growth factor 22                                                   | Q9HCT0 | FGF22    | NA | Wald ratio                | 1  | 0.158  | 0.357 | 6.581E-01 | 0.974 | pan | Severe COVID-19 |
| 11681_8   | NUPL                          | Arf-GAP domain and FG repeat-containing protein 1                             | P52594 | AGFG1    | NA | Wald ratio                | 1  | -0.106 | 0.240 | 6.582E-01 | 0.974 | pan | Severe COVID-19 |
| 12758_47  | GRID2                         | Glutamate receptor ionotropic, delta-2                                        | O43424 | GRID2    | NA | Inverse variance weighted | 9  | 0.057  | 0.130 | 6.588E-01 | 0.974 | pan | Severe COVID-19 |
| 16292_288 | GIP                           | Gastric inhibitory polypeptide                                                | P09681 | GIP      | NA | Wald ratio                | 1  | -0.183 | 0.419 | 6.616E-01 | 0.974 | pan | Severe COVID-19 |
| 19335_2   | HN1                           | Hematological and neurological expressed 1 protein                            | Q9UK76 | JPT1     | NA | Wald ratio                | 1  | 0.149  | 0.340 | 6.619E-01 | 0.974 | pan | Severe COVID-19 |
| 9357_4    | CREG1                         | Protein CREG1                                                                 | O75629 | CREG1    | NA | Inverse variance weighted | 10 | -0.013 | 0.031 | 6.623E-01 | 0.974 | pan | Severe COVID-19 |
| 6221_1    | ADPGK                         | ADP-dependent glucokinase                                                     | Q9RRR6 | ADPGK    | NA | Wald ratio                | 1  | -0.233 | 0.535 | 6.629E-01 | 0.974 | pan | Severe COVID-19 |
| 7140_1    | ELA2A                         | Chymotrypsin-like elastase family member 2A                                   | P08217 | CELA2A   | NA | Inverse variance weighted | 4  | 0.050  | 0.115 | 6.635E-01 | 0.974 | pan | Severe COVID-19 |
| 12376_85  | p19-INK4d                     | Cyclin-dependent kinase 4 inhibitor D                                         | P55273 | CDKN2D   | NA | Wald ratio                | 1  | -0.210 | 0.484 | 6.639E-01 | 0.974 | pan | Severe COVID-19 |
| 3313_21   | FCN2                          | Ficolin-2                                                                     | Q15485 | FCN2     | NA | Inverse variance weighted | 3  | -0.044 | 0.101 | 6.643E-01 | 0.974 | pan | Severe COVID-19 |
| 19129_15  | MTFSD                         | Methenyltetrahydrofolate synthase domain-containing protein                   | Q2M296 | MTFSD    | NA | Inverse variance weighted | 5  | -0.028 | 0.064 | 6.643E-01 | 0.974 | pan | Severe COVID-19 |
| 4160_49   | MMP-2                         | 72 kDa type IV collagenase                                                    | R08253 | MMP2     | NA | Inverse variance weighted | 2  | -0.084 | 0.194 | 6.645E-01 | 0.974 | pan | Severe COVID-19 |
| 5275_28   | VAV                           | Proto-oncogene vav                                                            | P15498 | VAV1     | NA | Wald ratio                | 1  | 0.121  | 0.279 | 6.652E-01 | 0.974 | pan | Severe COVID-19 |
| 15566_10  | Calponin-1                    | Calponin-1                                                                    | P51911 | CNN1     | NA | Inverse variance weighted | 10 | 0.032  | 0.074 | 6.656E-01 | 0.974 | pan | Severe COVID-19 |
| 8945_7    | F175B                         | BRISC complex subunit Abro1                                                   | Q15018 | ABRAXAS2 | NA | Wald ratio                | 1  | -0.105 | 0.244 | 6.664E-01 | 0.974 | pan | Severe COVID-19 |
| 8942_2    | RM21                          | 39S ribosomal protein L21, mitochondrial                                      | Q722W9 | MRPL21   | NA | Wald ratio                | 1  | -0.166 | 0.388 | 6.682E-01 | 0.974 | pan | Severe COVID-19 |
| 2730_58   | MICA                          | MHC class I polypeptide-related sequence A                                    | Q29983 | MICA     | NA | Inverse variance weighted | 13 | -0.021 | 0.050 | 6.684E-01 | 0.974 | pan | Severe COVID-19 |
| 12641_3   | ISP2                          | Type II inositol 1,4,5-trisphosphate 5-phosphatase                            | P32019 | INPP5B   | NA | Inverse variance weighted | 2  | 0.046  | 0.107 | 6.692E-01 | 0.974 | pan | Severe COVID-19 |
| 3213_65   | Nidogen                       | Nidogen-1                                                                     | P14543 | NID1     | NA | Inverse variance weighted | 2  | 0.105  | 0.245 | 6.692E-01 | 0.974 | pan | Severe COVID-19 |
| 11278_4   | COL11A2                       | Collagen alpha-2(XI) chain                                                    | P13942 | COL11A2  | NA | Inverse variance weighted | 7  | 0.024  | 0.056 | 6.699E-01 | 0.974 | pan | Severe COVID-19 |
| 15476_6   | REG3G                         | Regenerating islet-derived protein 3-gamma                                    | Q6UW15 | REG3G    | NA | Inverse variance weighted | 17 | 0.015  | 0.035 | 6.712E-01 | 0.974 | pan | Severe COVID-19 |
| 3853_56   | MDHC                          | Malate dehydrogenase, cytoplasmic                                             | P40925 | MDH1     | NA | Wald ratio                | 1  | -0.096 | 0.226 | 6.713E-01 | 0.974 | pan | Severe COVID-19 |
| 6574_11   | FAIM3                         | Fas apoptotic inhibitory molecule 3                                           | O60667 | FCMR     | NA | Inverse variance weighted | 3  | -0.075 | 0.177 | 6.720E-01 | 0.974 | pan | Severe COVID-19 |
| 6895_1    | TR-CD                         | Transferrin receptor protein 1: Cytoplasmic domain                            | P02786 | TFRC     | NA | Inverse variance weighted | 3  | 0.054  | 0.128 | 6.728E-01 | 0.974 | pan | Severe COVID-19 |
| 6990_44   | SDF2L                         | Stromal cell-derived factor 2-like protein 1                                  | Q9HCN8 | SDF2L1   | NA | Wald ratio                | 1  | 0.112  | 0.267 | 6.732E-01 | 0.974 | pan | Severe COVID-19 |
| 18942_11  | PSB9                          | Proteasome subunit beta type-9                                                | P28065 | PSMB9    | NA | Wald ratio                | 1  | 0.140  | 0.331 | 6.733E-01 | 0.974 | pan | Severe COVID-19 |
| 15336_7   | SELM                          | Selenoprotein M                                                               | Q8WWX9 | SELENO1  | NA | Wald ratio                | 1  | 0.149  | 0.353 | 6.734E-01 | 0.974 | pan | Severe COVID-19 |
| 18315_38  | RTP4                          | Receptor-transporting protein 4                                               | Q96DX8 | RTP4     | NA | Inverse variance weighted | 4  | 0.048  | 0.113 | 6.734E-01 | 0.974 | pan | Severe COVID-19 |
| 11130_158 | CACB4                         | Voltage-dependent L-type calcium channel subunit beta-4                       | O00305 | CACNB4   | NA | Wald ratio                | 1  | 0.055  | 0.130 | 6.738E-01 | 0.974 | pan | Severe COVID-19 |
| 12605_1   | Exosome component 3           | Exosome complex component RRP40                                               | Q9NQ75 | EXOSC3   | NA | Wald ratio                | 1  | -0.122 | 0.291 | 6.741E-01 | 0.974 | pan | Severe COVID-19 |
| 16610_13  | LRP10                         | Low-density lipoprotein receptor-related protein 10                           | Q724F1 | LRP10    | NA | Inverse variance weighted | 3  | -0.056 | 0.133 | 6.742E-01 | 0.974 | pan | Severe COVID-19 |
| 16055_3   | complement factor H-related 5 | Complement factor H-related protein 5                                         | Q9BXR6 | CFHR5    | NA | Inverse variance weighted | 6  | -0.037 | 0.087 | 6.746E-01 | 0.974 | pan | Severe COVID-19 |
| 11120_49  | NAT14                         | N-acetyltransferase 14                                                        | Q8WUY8 | NAT14    | NA | Wald ratio                | 1  | -0.068 | 0.161 | 6.746E-01 | 0.974 | pan | Severe COVID-19 |
| 13930_3   | ABC3G                         | DNA dc->du-editing enzyme APOBEC-3G                                           | Q9HC16 | APOBEC3G | NA | Inverse variance weighted | 2  | 0.048  | 0.113 | 6.749E-01 | 0.974 | pan | Severe COVID-19 |
| 5954_62   | PTH                           | Parathyroid hormone                                                           | P01270 | PTH      | NA | Inverse variance weighted | 2  | -0.056 | 0.134 | 6.755E-01 | 0.974 | pan | Severe COVID-19 |
| 16825_20  | ATX3                          | Ataxin-3                                                                      | P54252 | ATXN3    | NA | Inverse variance weighted | 4  | -0.024 | 0.057 | 6.756E-01 | 0.974 | pan | Severe COVID-19 |
| 4324_33   | CYTT                          | Cystatin-SA                                                                   | P09228 | CST2     | NA | Inverse variance weighted | 9  | 0.040  | 0.095 | 6.760E-01 | 0.974 | pan | Severe COVID-19 |
| 9867_23   | F16P2                         | Fructose-1,6-bisphosphatase isozyme 2                                         | O00757 | FBP2     | NA | Wald ratio                | 1  | 0.091  | 0.219 | 6.761E-01 | 0.974 | pan | Severe COVID-19 |
| 4563_61   | PLCG1                         | 1-phosphatidylinositol 4,5-bisphosphate phosphodiesterase gamma-1             | P19174 | PLCG1    | NA | Wald ratio                | 1  | 0.110  | 0.262 | 6.762E-01 | 0.974 | pan | Severe COVID-19 |
| 4840_73   | G-CSF                         | Granulocyte colony-stimulating factor                                         | P09919 | CSF3     | NA | Wald ratio                | 1  | 0.213  | 0.509 | 6.762E-01 | 0.974 | pan | Severe COVID-19 |
| 16853_5   | NRK1                          | Nicotinamide riboside kinase 1                                                | Q9NWW6 | NMRK1    | NA | Inverse variance weighted | 2  | 0.051  | 0.122 | 6.767E-01 | 0.974 | pan | Severe COVID-19 |
| 5615_62   | F172A                         | Protein FAM172A                                                               | Q8WUF8 | FAM172A  | NA | Wald ratio                | 1  | -0.087 | 0.209 | 6.778E-01 | 0.974 | pan | Severe COVID-19 |
| 3004_67   | PD-L2                         | Programmed cell death 1 ligand 2                                              | Q9BQ51 | PDCD1LG2 | NA | Inverse variance weighted | 6  | -0.017 | 0.041 | 6.802E-01 | 0.974 | pan | Severe COVID-19 |
| 2774_10   | IL-16                         | Interleukin-16                                                                | Q14005 | IL16     | NA | Inverse variance weighted | 6  | -0.015 | 0.036 | 6.809E-01 | 0.974 | pan | Severe COVID-19 |
| 3499_77   | IL-17B                        | Interleukin-17B                                                               | Q9UHF5 | IL17B    | NA | Wald ratio                | 1  | -0.086 | 0.209 | 6.814E-01 | 0.974 | pan | Severe COVID-19 |
| 3485_28   | b2-Microglobulin              | Beta-2-microglobulin                                                          | P61769 | B2M      | NA | Inverse variance weighted | 2  | 0.084  | 0.205 | 6.814E-01 | 0.974 | pan | Severe COVID-19 |
| 4706_17   | 41                            | Protein 4.1                                                                   | P11171 | EPB41    | NA | Wald ratio                | 1  | -0.119 | 0.290 | 6.818E-01 | 0.974 | pan | Severe COVID-19 |
| 15384_15  | KLOTHO                        | Klotho                                                                        | Q9UEF7 | KL       | NA | Inverse variance weighted | 14 | -0.029 | 0.071 | 6.823E-01 | 0.974 | pan | Severe COVID-19 |
| 5637_81   | NTNG1                         | Netrin-G1                                                                     | Q9Y2I2 | NTNG1    | NA | Inverse variance weighted | 15 | 0.013  | 0.032 | 6.825E-01 | 0.974 | pan | Severe COVID-19 |

|           |                                  |                                                                          |        |          |    |                           |    |        |       |           |       |     |                 |
|-----------|----------------------------------|--------------------------------------------------------------------------|--------|----------|----|---------------------------|----|--------|-------|-----------|-------|-----|-----------------|
| 11117_2   | SPT20                            | Spermatogenesis-associated protein 20                                    | Q8TB22 | SPATA20  | NA | Inverse variance weighted | 4  | -0.025 | 0.060 | 6.830E-01 | 0.974 | pan | Severe COVID-19 |
| 6123_69   | p53                              | Cellular tumor antigen p53                                               | P04637 | TP53     | NA | Inverse variance weighted | 2  | 0.084  | 0.206 | 6.831E-01 | 0.974 | pan | Severe COVID-19 |
| 2950_57   | IGFBP-4                          | Insulin-like growth factor-binding protein 4                             | P22692 | IGFBP4   | NA | Inverse variance weighted | 2  | 0.162  | 0.398 | 6.833E-01 | 0.974 | pan | Severe COVID-19 |
| 3336_50   | TFPI                             | Tissue factor pathway inhibitor                                          | P10646 | TFPI     | NA | Wald ratio                | 1  | -0.073 | 0.178 | 6.837E-01 | 0.974 | pan | Severe COVID-19 |
| 19377_14  | NOE2                             | Noelin-2                                                                 | Q95897 | OLFM2    | NA | Inverse variance weighted | 8  | 0.010  | 0.025 | 6.851E-01 | 0.974 | pan | Severe COVID-19 |
| 17210_2   | TCL1A                            | T-cell leukemia/lymphoma protein 1A                                      | P56279 | TCL1A    | NA | Inverse variance weighted | 5  | -0.056 | 0.138 | 6.854E-01 | 0.974 | pan | Severe COVID-19 |
| 6485_59   | IGLL1                            | Immunoglobulin lambda-like polypeptide 1                                 | P15814 | IGLL1    | NA | Inverse variance weighted | 26 | 0.015  | 0.036 | 6.860E-01 | 0.974 | pan | Severe COVID-19 |
| 2652_15   | suPAR                            | Urokinase plasminogen activator surface receptor                         | Q03405 | PLAUR    | NA | Wald ratio                | 1  | 0.188  | 0.464 | 6.860E-01 | 0.974 | pan | Severe COVID-19 |
| 15363_32  | Apo A-V                          | Apolipoprotein A-V                                                       | Q6Q788 | APOA5    | NA | Inverse variance weighted | 11 | 0.022  | 0.053 | 6.868E-01 | 0.974 | pan | Severe COVID-19 |
| 17410_5   | CETN3                            | Centrin-3                                                                | O15182 | CETN3    | NA | Inverse variance weighted | 3  | -0.056 | 0.140 | 6.871E-01 | 0.974 | pan | Severe COVID-19 |
| 10880_38  | F163B                            | Protein FAM163B                                                          | P0C2L3 | FAM163B  | NA | Inverse variance weighted | 3  | -0.123 | 0.305 | 6.871E-01 | 0.974 | pan | Severe COVID-19 |
| 14009_65  | TNFAIP3                          | Tumor necrosis factor alpha-induced protein 3                            | P21580 | TNFAIP3  | NA | Wald ratio                | 1  | -0.038 | 0.095 | 6.873E-01 | 0.974 | pan | Severe COVID-19 |
| 10754_113 | Prokineticin-2                   | Prokineticin-2                                                           | Q9HC23 | PROK2    | NA | Inverse variance weighted | 9  | -0.018 | 0.045 | 6.874E-01 | 0.974 | pan | Severe COVID-19 |
| 14208_3   | RET7                             | Retinoid-binding protein 7                                               | Q96R05 | RBP7     | NA | Inverse variance weighted | 2  | -0.054 | 0.135 | 6.877E-01 | 0.974 | pan | Severe COVID-19 |
| 17342_13  | AGR3                             | Anterior gradient protein 3                                              | Q8TD06 | AGR3     | NA | Wald ratio                | 1  | 0.132  | 0.328 | 6.887E-01 | 0.974 | pan | Severe COVID-19 |
| 3329_14   | PGRP-S                           | Peptidoglycan recognition protein 1                                      | O75594 | PGLYRP1  | NA | Inverse variance weighted | 4  | 0.039  | 0.097 | 6.892E-01 | 0.974 | pan | Severe COVID-19 |
| 7970_315  | NAR3                             | Ecto-ADP-ribosyltransferase 3                                            | Q13508 | ART3     | NA | Inverse variance weighted | 9  | -0.025 | 0.063 | 6.899E-01 | 0.974 | pan | Severe COVID-19 |
| 10815_2   | HABP4                            | Intracellular hyaluronan-binding protein 4                               | Q5JV50 | HABP4    | NA | Inverse variance weighted | 5  | 0.037  | 0.093 | 6.904E-01 | 0.974 | pan | Severe COVID-19 |
| 4984_83   | Esterase D                       | S-formylglutathione hydrolase                                            | P10768 | ESD      | NA | Inverse variance weighted | 4  | -0.031 | 0.079 | 6.908E-01 | 0.974 | pan | Severe COVID-19 |
| 12422_143 | LX15B                            | Arachidonate 15-lipoxygenase B                                           | O15296 | ALOX15B  | NA | Wald ratio                | 1  | 0.083  | 0.208 | 6.916E-01 | 0.974 | pan | Severe COVID-19 |
| 13416_8   | T132D                            | Transmembrane protein 132D                                               | Q14C87 | TMEM132D | NA | Inverse variance weighted | 5  | -0.036 | 0.092 | 6.917E-01 | 0.974 | pan | Severe COVID-19 |
| 19194_9   | Histidyl-tRNA synthetase-related | D-tyrosyl-tRNA(Tyr) deacylase 1                                          | Q8TEA8 | DTD1     | NA | Wald ratio                | 1  | 0.030  | 0.077 | 6.917E-01 | 0.974 | pan | Severe COVID-19 |
| 8840_61   | C1s                              | Complement C1s subcomponent                                              | P09871 | C1S      | NA | Inverse variance weighted | 3  | 0.063  | 0.159 | 6.919E-01 | 0.974 | pan | Severe COVID-19 |
| 5689_1    | DB112                            | Beta-defensin 112                                                        | Q30KQ8 | DEFB112  | NA | Wald ratio                | 1  | 0.068  | 0.172 | 6.923E-01 | 0.974 | pan | Severe COVID-19 |
| 2190_55   | Coagulation Factor XI            | Coagulation Factor XI                                                    | P03951 | F11      | NA | Inverse variance weighted | 5  | -0.039 | 0.099 | 6.924E-01 | 0.974 | pan | Severe COVID-19 |
| 6493_9    | CBPZ                             | Carboxypeptidase Z                                                       | Q66K79 | CPZ      | NA | Inverse variance weighted | 2  | 0.089  | 0.227 | 6.932E-01 | 0.974 | pan | Severe COVID-19 |
| 11514_196 | CD59                             | CD59 glycoprotein                                                        | P13987 | CD59     | NA | Inverse variance weighted | 3  | -0.058 | 0.148 | 6.940E-01 | 0.974 | pan | Severe COVID-19 |
| 12020_39  | PMGE                             | Bisphosphoglycerate mutase                                               | P07738 | BPGM     | NA | Wald ratio                | 1  | -0.190 | 0.484 | 6.945E-01 | 0.974 | pan | Severe COVID-19 |
| 6627_25   | UPR1                             | Inactive pancreatic lipase-related protein 1                             | P54315 | PNLIPRP1 | NA | Inverse variance weighted | 13 | -0.027 | 0.070 | 6.947E-01 | 0.974 | pan | Severe COVID-19 |
| 9816_37   | ISOC1                            | Isochorismatase domain-containing protein 1                              | Q96CN7 | ISOC1    | NA | Inverse variance weighted | 4  | 0.041  | 0.103 | 6.948E-01 | 0.974 | pan | Severe COVID-19 |
| 7886_26   | SPTC1                            | Serine palmitoyltransferase 1                                            | O15269 | SPTLC1   | NA | Inverse variance weighted | 2  | 0.072  | 0.184 | 6.949E-01 | 0.974 | pan | Severe COVID-19 |
| 15635_4   | SMOC2                            | SPARC-related modular calcium-binding protein 2                          | Q9H3U7 | SMOC2    | NA | Inverse variance weighted | 5  | -0.019 | 0.047 | 6.952E-01 | 0.974 | pan | Severe COVID-19 |
| 14634_13  | LSHR                             | Lutropin-choriogonadotropin hormone receptor                             | P22888 | LHCGR    | NA | Inverse variance weighted | 5  | -0.057 | 0.145 | 6.955E-01 | 0.974 | pan | Severe COVID-19 |
| 15530_33  | EphB4                            | Ephrin type-B receptor 4                                                 | P54760 | EPHB4    | NA | Inverse variance weighted | 4  | -0.064 | 0.164 | 6.957E-01 | 0.974 | pan | Severe COVID-19 |
| 3421_54   | CD30 Ligand                      | Tumor necrosis factor ligand superfamily member 8                        | P32971 | TNFSF8   | NA | Inverse variance weighted | 2  | -0.074 | 0.190 | 6.958E-01 | 0.974 | pan | Severe COVID-19 |
| 12563_2   | TFIP8                            | Tumor necrosis factor alpha-induced protein 8                            | O95379 | TNFAIP8  | NA | Inverse variance weighted | 2  | 0.049  | 0.125 | 6.961E-01 | 0.974 | pan | Severe COVID-19 |
| 7926_13   | SPIT3                            | Kunitz-type protease inhibitor 3                                         | P49223 | SPINT3   | NA | Inverse variance weighted | 4  | 0.039  | 0.101 | 6.968E-01 | 0.974 | pan | Severe COVID-19 |
| 8429_16   | AXIN2                            | Axin-2                                                                   | Q9Y271 | AXIN2    | NA | Inverse variance weighted | 4  | 0.061  | 0.158 | 6.972E-01 | 0.974 | pan | Severe COVID-19 |
| 13059_33  | RIFK                             | Riboflavin kinase                                                        | Q969G6 | RFK      | NA | Inverse variance weighted | 2  | -0.059 | 0.151 | 6.982E-01 | 0.974 | pan | Severe COVID-19 |
| 13959_7   | LAP                              | Cytosol aminopeptidase                                                   | P28838 | LAP3     | NA | Wald ratio                | 1  | -0.180 | 0.465 | 6.984E-01 | 0.974 | pan | Severe COVID-19 |
| 6444_15   | PSG3                             | Pregnancy-specific beta-1-glycoprotein 3                                 | Q16557 | PSG3     | NA | Inverse variance weighted | 6  | -0.047 | 0.122 | 6.985E-01 | 0.974 | pan | Severe COVID-19 |
| 3367_8    | FETUB                            | Fetuin-B                                                                 | Q9UGM5 | FETUB    | NA | Inverse variance weighted | 7  | -0.033 | 0.085 | 6.990E-01 | 0.974 | pan | Severe COVID-19 |
| 19341_36  | ACB06                            | Acyl-CoA-binding domain-containing protein 6                             | Q9BR61 | ACB06    | NA | Inverse variance weighted | 5  | -0.041 | 0.107 | 6.995E-01 | 0.974 | pan | Severe COVID-19 |
| 15394_79  | UNC5B                            | Netrin receptor UNC5B                                                    | Q8I2J1 | UNC5B    | NA | Inverse variance weighted | 4  | 0.046  | 0.118 | 7.002E-01 | 0.974 | pan | Severe COVID-19 |
| 12530_14  | CKS-1                            | Cyclin-dependent kinases regulatory subunit 1                            | P61024 | CKS1B    | NA | Inverse variance weighted | 3  | -0.066 | 0.171 | 7.004E-01 | 0.974 | pan | Severe COVID-19 |
| 12386_11  | AMPB                             | Aminopeptidase B                                                         | Q9H44A | RNPEP    | NA | Inverse variance weighted | 5  | 0.033  | 0.085 | 7.010E-01 | 0.974 | pan | Severe COVID-19 |
| 9076_25   | PENK                             | Proenkephalin-A                                                          | P01210 | PENK     | NA | Inverse variance weighted | 13 | -0.011 | 0.028 | 7.013E-01 | 0.974 | pan | Severe COVID-19 |
| 6367_66   | fibromodulin                     | fibromodulin                                                             | Q06828 | FMOD     | NA | Inverse variance weighted | 5  | -0.040 | 0.105 | 7.021E-01 | 0.974 | pan | Severe COVID-19 |
| 5704_74   | Granzyme M                       | Granzyme M                                                               | P51124 | GZMM     | NA | Inverse variance weighted | 2  | -0.087 | 0.227 | 7.026E-01 | 0.974 | pan | Severe COVID-19 |
| 3024_18   | a2-Antiplasmin                   | Alpha-2-antiplasmin                                                      | P08697 | SERPINF2 | NA | Inverse variance weighted | 6  | 0.033  | 0.085 | 7.027E-01 | 0.974 | pan | Severe COVID-19 |
| 14685_17  | PKB beta                         | RAC-beta serine/threonine-protein kinase                                 | P31751 | AKT2     | NA | Inverse variance weighted | 5  | -0.071 | 0.186 | 7.030E-01 | 0.974 | pan | Severe COVID-19 |
| 8017_23   | FXRD1                            | FAD-dependent oxidoreductase domain-containing protein 1                 | Q96CU9 | FOXRED1  | NA | Wald ratio                | 1  | -0.131 | 0.345 | 7.033E-01 | 0.974 | pan | Severe COVID-19 |
| 4474_19   | Ubiquitin                        | Ubiquitin                                                                | P62979 | RPS27A   | NA | Wald ratio                | 1  | -0.154 | 0.404 | 7.036E-01 | 0.974 | pan | Severe COVID-19 |
| 4991_12   | GPC5                             | Glypican-5                                                               | P78333 | GPC5     | NA | Inverse variance weighted | 11 | -0.016 | 0.042 | 7.043E-01 | 0.974 | pan | Severe COVID-19 |
| 15329_167 | MAP1P                            | Regulator complex protein LAMTOR2                                        | Q9Y2Q5 | LAMTOR2  | NA | Wald ratio                | 1  | 0.156  | 0.412 | 7.047E-01 | 0.974 | pan | Severe COVID-19 |
| 7753_21   | HTAI2                            | Oxidoreductase HTATIP2                                                   | Q9BUP3 | HTATIP2  | NA | Wald ratio                | 1  | 0.154  | 0.407 | 7.052E-01 | 0.974 | pan | Severe COVID-19 |
| 7141_21   | MGAT4B                           | Alpha-1,3-mannosyl-glycoprotein 4-beta-N-acetylglucosaminyltransferase B | Q9UQ53 | MGAT4B   | NA | Inverse variance weighted | 4  | -0.016 | 0.042 | 7.053E-01 | 0.974 | pan | Severe COVID-19 |
| 7863_50   | PGRC1                            | Membrane-associated progesterone receptor component 1                    | O00264 | PGRCM1   | NA | Wald ratio                | 1  | 0.144  | 0.382 | 7.057E-01 | 0.974 | pan | Severe COVID-19 |
| 19267_14  | GLO2                             | Hydroxyacylglutathione hydrolase, mitochondrial                          | Q16775 | HAGH     | NA | Wald ratio                | 1  | 0.038  | 0.101 | 7.062E-01 | 0.974 | pan | Severe COVID-19 |
| 17755_5   | UGDH                             | UDP-glucose 6-dehydrogenase                                              | O60701 | UGDH     | NA | Inverse variance weighted | 3  | -0.026 | 0.069 | 7.065E-01 | 0.974 | pan | Severe COVID-19 |
| 4467_49   | SPARCL1                          | SPARC-like protein 1                                                     | Q14515 | SPARCL1  | NA | Inverse variance weighted | 10 | 0.017  | 0.045 | 7.065E-01 | 0.974 | pan | Severe COVID-19 |
| 8309_12   | HYAL1                            | Hyaluronidase-1                                                          | Q12794 | HYAL1    | NA | Wald ratio                | 1  | 0.118  | 0.314 | 7.067E-01 | 0.974 | pan | Severe COVID-19 |
| 3858_5    | PPAC                             | Low molecular weight phosphotyrosine protein phosphatase                 | P24666 | ACP1     | NA | Inverse variance weighted | 9  | -0.012 | 0.031 | 7.067E-01 | 0.974 | pan | Severe COVID-19 |
| 7696_3    | NBR1                             | Next to BRCA1 gene 1 protein                                             | Q14596 | NBR1     | NA | Wald ratio                | 1  | -0.206 | 0.547 | 7.068E-01 | 0.974 | pan | Severe COVID-19 |
| 2974_61   | contactin-1                      | Contactin-1                                                              | Q12860 | CNTN1    | NA | Inverse variance weighted | 7  | -0.019 | 0.051 | 7.071E-01 | 0.974 | pan | Severe COVID-19 |
| 11480_1   | Aldehyde dehydrogenase, class 3  | Aldehyde dehydrogenase, dimeric NADP-preferring                          | P30838 | ALDH3A1  | NA | Wald ratio                | 1  | -0.047 | 0.125 | 7.085E-01 | 0.974 | pan | Severe COVID-19 |
| 9049_2    | MOT4                             | Monocarboxylate transporter 4                                            | O15427 | SLC16A3  | NA | Wald ratio                | 1  | 0.172  | 0.459 | 7.086E-01 | 0.974 | pan | Severe COVID-19 |
| 7933_75   | ADA22                            | Disintegrin and metalloproteinase domain-containing protein 22           | Q9P0K1 | ADAM22   | NA | Inverse variance weighted | 5  | 0.017  | 0.047 | 7.092E-01 | 0.974 | pan | Severe COVID-19 |
| 7115_5    | Semenogelin                      | Semenogelin-1                                                            | P04279 | SEMG1    | NA | Inverse variance weighted | 16 | -0.022 | 0.059 | 7.094E-01 | 0.974 | pan | Severe COVID-19 |
| 14614_41  | CA130                            | Noncompact myelin-associated protein                                     | Q5T158 | NCMAP    | NA | Inverse variance weighted | 12 | 0.016  | 0.044 | 7.096E-01 | 0.974 | pan | Severe COVID-19 |
| 4246_40   | NCAM-L1                          | Neural cell adhesion molecule L1                                         | P32004 | L1CAM    | NA | Inverse variance weighted | 5  | -0.052 | 0.141 | 7.102E-01 | 0.974 | pan | Severe COVID-19 |
| 5632_6    | CRAC1                            | Cartilage acidic protein 1                                               | Q9NQ79 | CRAC1    | NA | Inverse variance weighted | 10 | -0.013 | 0.036 | 7.108E-01 | 0.974 | pan | Severe COVID-19 |
| 9253_52   | BGAT                             | Histo-blood group ABO system transferase                                 | P16442 | ABO      | NA | Inverse variance weighted | 13 | 0.024  | 0.064 | 7.112E-01 | 0.974 | pan | Severe COVID-19 |
| 4496_60   | MMP-12                           | Macrophage metalloelastase                                               | P39900 | MMP12    | NA | Inverse variance weighted | 13 | -0.011 | 0.029 | 7.115E-01 | 0.974 | pan | Severe COVID-19 |
| 12408_333 | RB22A                            | Ras-related protein Rab-22A                                              | Q9UL26 | RAB22A   | NA | Inverse variance weighted | 2  | 0.132  | 0.358 | 7.126E-01 | 0.974 | pan | Severe COVID-19 |
| 9969_8    | S22AG                            | Solute carrier family 22 member 16                                       | Q86VW1 | SLC22A16 | NA | Inverse variance weighted | 3  | -0.090 | 0.244 | 7.127E-01 | 0.974 | pan | Severe COVID-19 |
| 2961_1    | Protein C                        | Vitamin K-dependent protein C                                            | P04070 | PROC     | NA | Inverse variance weighted | 8  | -0.034 | 0.092 | 7.131E-01 | 0.974 | pan | Severe COVID-19 |
| 9282_12   | CRIS2                            | Cysteine-rich secretory protein 2                                        | P16562 | CRISP2   | NA | Inverse variance weighted | 33 | -0.008 | 0.022 | 7.139E-01 | 0.974 | pan | Severe COVID-19 |

|           |                             |                                                               |        |          |    |                           |    |        |       |           |       |     |                 |
|-----------|-----------------------------|---------------------------------------------------------------|--------|----------|----|---------------------------|----|--------|-------|-----------|-------|-----|-----------------|
| 6965_19   | CNTP2                       | Contactin-associated protein-like 2                           | Q9UHC6 | CNTNAP2  | NA | Inverse variance weighted | 6  | 0.023  | 0.063 | 7.142E-01 | 0.974 | pan | Severe COVID-19 |
| 3309_2    | FCG2A                       | Low affinity immunoglobulin gamma Fc region receptor II-a     | P12318 | FCGR2A   | NA | Inverse variance weighted | 8  | -0.031 | 0.083 | 7.144E-01 | 0.974 | pan | Severe COVID-19 |
| 7218_87   | AT1B2                       | Sodium/potassium-transporting ATPase subunit beta-2           | P14415 | ATP1B2   | NA | Inverse variance weighted | 4  | -0.035 | 0.095 | 7.149E-01 | 0.974 | pan | Severe COVID-19 |
| 13587_10  | RGAP1                       | Rac GTPase-activating protein 1                               | Q9H0H5 | RACGAP1  | NA | Inverse variance weighted | 11 | 0.025  | 0.068 | 7.152E-01 | 0.974 | pan | Severe COVID-19 |
| 17138_8   | GST A1-1                    | Glutathione S-transferase A1                                  | P08263 | GSTA1    | NA | Inverse variance weighted | 4  | -0.040 | 0.110 | 7.155E-01 | 0.974 | pan | Severe COVID-19 |
| 17737_7   | IVD                         | Isovaleryl-CoA dehydrogenase, mitochondrial                   | P26440 | IVD      | NA | Inverse variance weighted | 3  | 0.051  | 0.139 | 7.159E-01 | 0.974 | pan | Severe COVID-19 |
| 17345_12  | ZADH2                       | Prostaglandin reductase 3                                     | Q8NAQ0 | PTGR3    | NA | Wald ratio                | 1  | -0.055 | 0.151 | 7.169E-01 | 0.974 | pan | Severe COVID-19 |
| 14151_4   | UCRP                        | Ubiquitin-like protein ISG15                                  | P05161 | ISG15    | NA | Inverse variance weighted | 4  | -0.075 | 0.206 | 7.169E-01 | 0.974 | pan | Severe COVID-19 |
| 12764_3   | ELMO1                       | Engulfment and cell motility protein 1                        | Q92556 | ELMO1    | NA | Inverse variance weighted | 3  | 0.047  | 0.129 | 7.176E-01 | 0.974 | pan | Severe COVID-19 |
| 17746_77  | FIS1                        | Mitochondrial fission 1 protein                               | Q9Y3D6 | FIS1     | NA | Inverse variance weighted | 2  | 0.152  | 0.420 | 7.179E-01 | 0.974 | pan | Severe COVID-19 |
| 13242_134 | SHAN3                       | SH3 and multiple ankyrin repeat domains protein 3             | Q9BYB0 | SHANK3   | NA | Inverse variance weighted | 3  | 0.062  | 0.173 | 7.180E-01 | 0.974 | pan | Severe COVID-19 |
| 6557_50   | LRC15                       | Leucine-rich repeat-containing protein 15                     | Q8TF66 | LRRC15   | NA | Inverse variance weighted | 4  | 0.050  | 0.140 | 7.184E-01 | 0.974 | pan | Severe COVID-19 |
| 11540_37  | FOXO3A                      | Forkhead box protein O3                                       | Q43524 | FOXO3    | NA | Wald ratio                | 1  | 0.106  | 0.294 | 7.185E-01 | 0.974 | pan | Severe COVID-19 |
| 14271_23  | RAB6B                       | Ras-related protein Rab-6B                                    | Q9NRW1 | RAB6B    | NA | Wald ratio                | 1  | 0.044  | 0.122 | 7.190E-01 | 0.974 | pan | Severe COVID-19 |
| 11606_22  | DNJB6                       | DnaJ homolog subfamily B member 6                             | Q75190 | DNAJB6   | NA | Wald ratio                | 1  | 0.115  | 0.322 | 7.197E-01 | 0.974 | pan | Severe COVID-19 |
| 3179_51   | Cathepsin A                 | Lysosomal protective protein                                  | P10619 | CTSA     | NA | Inverse variance weighted | 2  | -0.242 | 0.676 | 7.207E-01 | 0.974 | pan | Severe COVID-19 |
| 14143_8   | H2B2E                       | Histone H2B type 2-E                                          | Q16778 | H2BC21   | NA | Wald ratio                | 1  | 0.107  | 0.298 | 7.207E-01 | 0.974 | pan | Severe COVID-19 |
| 5005_4    | MK12                        | Mitogen-activated protein kinase 12                           | P53778 | MAPK12   | NA | Inverse variance weighted | 2  | 0.037  | 0.103 | 7.210E-01 | 0.974 | pan | Severe COVID-19 |
| 15559_5   | ANTR2                       | Anthrax toxin receptor 2                                      | P58335 | ANTXR2   | NA | Inverse variance weighted | 5  | 0.040  | 0.113 | 7.223E-01 | 0.974 | pan | Severe COVID-19 |
| 4137_57   | IL-17E                      | Interleukin-25                                                | Q8H293 | IL25     | NA | Inverse variance weighted | 3  | -0.078 | 0.220 | 7.227E-01 | 0.974 | pan | Severe COVID-19 |
| 5350_14   | GPC6                        | Glypican-6                                                    | Q9Y625 | GPC6     | NA | Inverse variance weighted | 2  | -0.077 | 0.217 | 7.229E-01 | 0.974 | pan | Severe COVID-19 |
| 19637_9   | CRH                         | Corticotiberin                                                | P06850 | CRH      | NA | Wald ratio                | 1  | 0.087  | 0.245 | 7.230E-01 | 0.974 | pan | Severe COVID-19 |
| 7849_3    | Glutaminy cyclase           | Glutaminy-peptide cyclotransferase                            | Q16769 | QPCT     | NA | Inverse variance weighted | 7  | -0.024 | 0.069 | 7.236E-01 | 0.974 | pan | Severe COVID-19 |
| 10499_1   | T106A                       | Transmembrane protein 106A                                    | Q96A25 | TMEM106A | NA | Inverse variance weighted | 2  | 0.072  | 0.204 | 7.251E-01 | 0.974 | pan | Severe COVID-19 |
| 2637_77   | Macrophage mannose receptor | Macrophage mannose receptor 1                                 | P22897 | MRC1     | NA | Inverse variance weighted | 15 | -0.015 | 0.042 | 7.254E-01 | 0.974 | pan | Severe COVID-19 |
| 9906_21   | TICN3                       | Testican-3                                                    | Q9BQ16 | SPOCK3   | NA | Inverse variance weighted | 12 | 0.013  | 0.038 | 7.258E-01 | 0.974 | pan | Severe COVID-19 |
| 4960_72   | annexin I                   | Annexin A1                                                    | P04083 | ANXA1    | NA | Wald ratio                | 1  | -0.040 | 0.115 | 7.258E-01 | 0.974 | pan | Severe COVID-19 |
| 18172_71  | ASF1A                       | Histone chaperone ASF1A                                       | Q9Y294 | ASF1A    | NA | Inverse variance weighted | 2  | 0.043  | 0.122 | 7.261E-01 | 0.974 | pan | Severe COVID-19 |
| 6472_40   | GP100                       | Melanocyte protein PMEL                                       | P40967 | PMEL     | NA | Inverse variance weighted | 14 | 0.020  | 0.057 | 7.269E-01 | 0.974 | pan | Severe COVID-19 |
| 12556_7   | UBE2C                       | Ubiquitin-conjugating enzyme E2 C                             | Q00762 | UBE2C    | NA | Inverse variance weighted | 2  | -0.048 | 0.137 | 7.272E-01 | 0.974 | pan | Severe COVID-19 |
| 19169_88  | FIBP                        | Acidic fibroblast growth factor intracellular-binding protein | Q43427 | FIBP     | NA | Wald ratio                | 1  | -0.067 | 0.193 | 7.275E-01 | 0.974 | pan | Severe COVID-19 |
| 12333_87  | RP1A                        | Ribose-5-phosphate isomerase                                  | P49247 | RP1A     | NA | Inverse variance weighted | 2  | -0.087 | 0.250 | 7.276E-01 | 0.974 | pan | Severe COVID-19 |
| 4128_27   | Eotaxin-2                   | C-C motif chemokine 24                                        | O00175 | CCL24    | NA | Wald ratio                | 1  | -0.113 | 0.325 | 7.278E-01 | 0.974 | pan | Severe COVID-19 |
| 4990_87   | GP1BA                       | Platelet glycoprotein Ib alpha chain                          | P07359 | GP1BA    | NA | Inverse variance weighted | 9  | -0.033 | 0.095 | 7.284E-01 | 0.974 | pan | Severe COVID-19 |
| 13983_27  | QOR                         | Quinone oxidoreductase                                        | Q08257 | CRYZ     | NA | Inverse variance weighted | 15 | 0.010  | 0.027 | 7.284E-01 | 0.974 | pan | Severe COVID-19 |
| 4374_45   | MIC-1                       | Growth/differentiation factor 15                              | Q99988 | GDF15    | NA | Inverse variance weighted | 9  | -0.017 | 0.048 | 7.290E-01 | 0.974 | pan | Severe COVID-19 |
| 15444_45  | SCCA2                       | Serpin B4                                                     | P48594 | SERPINF4 | NA | Inverse variance weighted | 5  | -0.047 | 0.135 | 7.292E-01 | 0.974 | pan | Severe COVID-19 |
| 6433_57   | FA20A                       | Pseudokinase FAM20A                                           | Q96MK3 | FAM20A   | NA | Inverse variance weighted | 3  | 0.060  | 0.167 | 7.297E-01 | 0.974 | pan | Severe COVID-19 |
| 3795_6    | ADAM 9                      | Disintegrin and metalloproteinase domain-containing protein 9 | Q13443 | ADAM9    | NA | Wald ratio                | 1  | 0.126  | 0.374 | 7.305E-01 | 0.974 | pan | Severe COVID-19 |
| 6375_75   | XXLT1                       | Xyloside xylosyltransferase 1                                 | Q8NB16 | XXYL1    | NA | Inverse variance weighted | 2  | 0.023  | 0.068 | 7.306E-01 | 0.974 | pan | Severe COVID-19 |
| 14332_3   | RALA                        | Ras-related protein Ral-A                                     | P11233 | RALA     | NA | Inverse variance weighted | 2  | -0.083 | 0.240 | 7.310E-01 | 0.974 | pan | Severe COVID-19 |
| 17813_21  | BPHL                        | Valacyclovir hydrolase                                        | Q86WA6 | BPHL     | NA | Inverse variance weighted | 2  | -0.110 | 0.319 | 7.310E-01 | 0.974 | pan | Severe COVID-19 |
| 2851_63   | C5a                         | C5a anaphylatoxin                                             | P01031 | C5       | NA | Inverse variance weighted | 4  | -0.039 | 0.115 | 7.315E-01 | 0.974 | pan | Severe COVID-19 |
| 7083_74   | MATN4                       | Matrilin-4                                                    | Q95460 | MATN4    | NA | Inverse variance weighted | 3  | 0.033  | 0.096 | 7.317E-01 | 0.974 | pan | Severe COVID-19 |
| 12968_2   | CSRP2                       | Cysteine and glycine-rich protein 2                           | Q16527 | CSRP2    | NA | Wald ratio                | 1  | 0.098  | 0.287 | 7.321E-01 | 0.974 | pan | Severe COVID-19 |
| 9964_10   | MYZAP                       | Mycardial zonula adherens protein                             | POCAP1 | MYZAP    | NA | Inverse variance weighted | 2  | -0.065 | 0.190 | 7.325E-01 | 0.974 | pan | Severe COVID-19 |
| 8859_51   | CAH11                       | Carbonic anhydrase-related protein 11                         | Q75493 | CA11     | NA | Inverse variance weighted | 2  | 0.130  | 0.382 | 7.339E-01 | 0.974 | pan | Severe COVID-19 |
| 3852_19   | HSP 40                      | DnaJ homolog subfamily B member 1                             | P25685 | DNAJB1   | NA | Inverse variance weighted | 3  | 0.116  | 0.342 | 7.340E-01 | 0.974 | pan | Severe COVID-19 |
| 16607_78  | Gelsolin                    | Gelsolin                                                      | P06396 | GSN      | NA | Inverse variance weighted | 9  | -0.034 | 0.102 | 7.343E-01 | 0.974 | pan | Severe COVID-19 |
| 11128_29  | T132C:CD                    | Transmembrane protein 132C: Cytoplasmic domain                | Q8N3T6 | TMEM132C | NA | Wald ratio                | 1  | -0.114 | 0.336 | 7.352E-01 | 0.974 | pan | Severe COVID-19 |
| 2381_52   | C5                          | Complement C5                                                 | P01031 | C5       | NA | Inverse variance weighted | 2  | 0.041  | 0.123 | 7.370E-01 | 0.974 | pan | Severe COVID-19 |
| 7145_1    | ITH3                        | Inter-alpha-trypsin inhibitor heavy chain H3                  | Q06033 | ITH3     | NA | Inverse variance weighted | 11 | 0.023  | 0.068 | 7.371E-01 | 0.974 | pan | Severe COVID-19 |
| 9256_78   | NPTX1                       | Neuronal pentraxin-1                                          | Q15818 | NPTX1    | NA | Inverse variance weighted | 10 | -0.015 | 0.046 | 7.372E-01 | 0.974 | pan | Severe COVID-19 |
| 2590_69   | ROR1                        | Inactive tyrosine-protein kinase transmembrane receptor ROR1  | Q01973 | ROR1     | NA | Inverse variance weighted | 4  | 0.022  | 0.065 | 7.383E-01 | 0.974 | pan | Severe COVID-19 |
| 17490_4   | SH3BGR13-like protein       | SH3 domain-binding glutamic acid-rich-like protein 3          | Q9H299 | SH3BGR13 | NA | Inverse variance weighted | 4  | 0.036  | 0.107 | 7.384E-01 | 0.974 | pan | Severe COVID-19 |
| 7761_125  | CHK8                        | Choline/ethanolamine kinase                                   | Q9Y259 | CHK8     | NA | Inverse variance weighted | 3  | -0.041 | 0.122 | 7.396E-01 | 0.974 | pan | Severe COVID-19 |
| 16561_9   | Alpha-1B-glycoprotein       | Alpha-1B-glycoprotein                                         | Q04217 | A1BG     | NA | Inverse variance weighted | 8  | 0.011  | 0.034 | 7.407E-01 | 0.974 | pan | Severe COVID-19 |
| 17435_43  | ETFA                        | Electron transfer flavoprotein subunit alpha, mitochondrial   | P13804 | ETFA     | NA | Inverse variance weighted | 6  | 0.043  | 0.131 | 7.408E-01 | 0.974 | pan | Severe COVID-19 |
| 2789_26   | MMP-7                       | Matrilysin                                                    | P09237 | MMP7     | NA | Inverse variance weighted | 7  | -0.022 | 0.067 | 7.409E-01 | 0.974 | pan | Severe COVID-19 |
| 9578_263  | MAN54                       | MAN5C domain-containing protein 4                             | AGNH57 | MAN5C4   | NA | Inverse variance weighted | 10 | 0.010  | 0.032 | 7.412E-01 | 0.974 | pan | Severe COVID-19 |
| 12459_13  | PKHA1                       | Pleckstrin homology domain-containing family A member 1       | Q9HB21 | PLEKHA1  | NA | Inverse variance weighted | 3  | 0.016  | 0.050 | 7.415E-01 | 0.974 | pan | Severe COVID-19 |
| 6947_4    | SIA10                       | Type 2 lactosamine alpha-2,3-sialyltransferase                | Q9Y274 | ST3GAL6  | NA | Inverse variance weighted | 30 | -0.007 | 0.022 | 7.420E-01 | 0.974 | pan | Severe COVID-19 |
| 3184_25   | Coagulation Factor VII      | Coagulation factor VII                                        | P08709 | F7       | NA | Inverse variance weighted | 10 | 0.011  | 0.034 | 7.425E-01 | 0.974 | pan | Severe COVID-19 |
| 12384_92  | CSN7B                       | COP9 signalosome complex subunit 7b                           | Q9H9Q2 | CSP57B   | NA | Inverse variance weighted | 4  | 0.065  | 0.198 | 7.425E-01 | 0.974 | pan | Severe COVID-19 |
| 9394_19   | Aminopeptidase              | Carboxypeptidase Q                                            | Q9Y646 | CPQ      | NA | Inverse variance weighted | 12 | 0.014  | 0.042 | 7.435E-01 | 0.974 | pan | Severe COVID-19 |
| 19251_56  | Platelet proteoglycan       | Serglycin                                                     | P10124 | SRGN     | NA | Inverse variance weighted | 7  | 0.020  | 0.061 | 7.442E-01 | 0.974 | pan | Severe COVID-19 |
| 8402_22   | CYT11                       | Cytokine-like protein 1                                       | Q9NRR1 | CYT11    | NA | Inverse variance weighted | 3  | -0.031 | 0.094 | 7.444E-01 | 0.974 | pan | Severe COVID-19 |
| 3796_79   | ANG14                       | Angiopoietin-related protein 4                                | Q9BY76 | ANGPT14  | NA | Wald ratio                | 1  | -0.083 | 0.253 | 7.446E-01 | 0.974 | pan | Severe COVID-19 |
| 3028_36   | Ck-b-8-1                    | Ck-beta-8-1                                                   | P55773 | CCL23    | NA | Inverse variance weighted | 4  | -0.049 | 0.151 | 7.447E-01 | 0.974 | pan | Severe COVID-19 |
| 3054_3    | Haptoglobin, Mixed Type     | Haptoglobin                                                   | P00738 | HP       | NA | Inverse variance weighted | 10 | -0.031 | 0.097 | 7.452E-01 | 0.974 | pan | Severe COVID-19 |
| 15440_57  | NEC2                        | Neuroendocrine convertase 2                                   | P16519 | PCSK2    | NA | Wald ratio                | 1  | -0.058 | 0.178 | 7.456E-01 | 0.974 | pan | Severe COVID-19 |
| 16890_37  | ATL1                        | ADAMTS-like protein 1                                         | Q8N6G6 | ADAMTSL1 | NA | Inverse variance weighted | 8  | 0.017  | 0.053 | 7.457E-01 | 0.974 | pan | Severe COVID-19 |
| 5737_61   | SEM4D                       | Semaphorin-4D                                                 | Q92854 | SEMA4D   | NA | Inverse variance weighted | 8  | -0.016 | 0.048 | 7.462E-01 | 0.974 | pan | Severe COVID-19 |
| 2436_49   | CXCL16, soluble             | C-X-C motif chemokine 16                                      | Q9H2A7 | CXCL16   | NA | Inverse variance weighted | 11 | 0.030  | 0.093 | 7.469E-01 | 0.974 | pan | Severe COVID-19 |
| 19563_3   | SEZ6L                       | Seizure 6-like protein                                        | Q9BYH1 | SEZ6L    | NA | Inverse variance weighted | 3  | 0.043  | 0.133 | 7.469E-01 | 0.974 | pan | Severe COVID-19 |
| 5256_86   | PDE5A                       | cGMP-specific 3',5'-cyclic phosphodiesterase                  | Q76074 | PDE5A    | NA | Inverse variance weighted | 5  | -0.041 | 0.128 | 7.473E-01 | 0.974 | pan | Severe COVID-19 |
| 4162_54   | Transferrin                 | Serotransferrin                                               | P02787 | TF       | NA | Inverse variance weighted | 2  | -0.070 | 0.216 | 7.476E-01 | 0.974 | pan | Severe COVID-19 |
| 7157_22   | PCDA4                       | Protocadherin alpha-4                                         | Q9UN74 | PCDHA4   | NA | Inverse variance weighted | 12 | 0.037  | 0.114 | 7.479E-01 | 0.974 | pan | Severe COVID-19 |

|           |                                            |                                                               |        |           |    |                           |    |        |       |           |       |     |                 |
|-----------|--------------------------------------------|---------------------------------------------------------------|--------|-----------|----|---------------------------|----|--------|-------|-----------|-------|-----|-----------------|
| 7986_98   | NALD2                                      | N-acetylated-alpha-linked acidic dipeptidase 2                | Q9Y3Q0 | NAALAD2   | NA | Inverse variance weighted | 10 | 0.013  | 0.042 | 7.480E-01 | 0.974 | pan | Severe COVID-19 |
| 19135_5   | Cytosolic 5'-nucleotidase III-like protein | 7-methylguanosine phosphate-specific 5'-nucleotidase          | Q96977 | NT5C3B    | NA | Inverse variance weighted | 13 | -0.016 | 0.048 | 7.482E-01 | 0.974 | pan | Severe COVID-19 |
| 6378_2    | CEI                                        | Protein CEI                                                   | Q86519 | C5orf38   | NA | Wald ratio                | 1  | -0.078 | 0.242 | 7.483E-01 | 0.974 | pan | Severe COVID-19 |
| 13720_95  | Proteinase-3                               | Myeloblastin                                                  | P24158 | PRTN3     | NA | Inverse variance weighted | 9  | 0.012  | 0.036 | 7.487E-01 | 0.974 | pan | Severe COVID-19 |
| 10569_28  | MFAP2                                      | Microfibrillar-associated protein 2                           | P55001 | MFAP2     | NA | Inverse variance weighted | 3  | 0.064  | 0.201 | 7.491E-01 | 0.974 | pan | Severe COVID-19 |
| 7251_64   | CIQT3                                      | Complement C1q tumor necrosis factor-related protein 3        | Q9BXI4 | C1QTNF3   | NA | Inverse variance weighted | 3  | 0.032  | 0.102 | 7.498E-01 | 0.974 | pan | Severe COVID-19 |
| 15556_49  | Alpha-amylase 2B                           | Alpha-amylase 2B                                              | P19961 | AMY2B     | NA | Inverse variance weighted | 4  | 0.045  | 0.141 | 7.512E-01 | 0.974 | pan | Severe COVID-19 |
| 10565_19  | SLIK3                                      | SLIT and NTRK-like protein 3                                  | Q94933 | SLTRK3    | NA | Inverse variance weighted | 15 | 0.016  | 0.050 | 7.515E-01 | 0.974 | pan | Severe COVID-19 |
| 16070_7   | WIF-1                                      | Wnt inhibitory factor 1                                       | Q9Y5W5 | WIF1      | NA | Wald ratio                | 1  | -0.079 | 0.250 | 7.518E-01 | 0.974 | pan | Severe COVID-19 |
| 9278_9    | SDF-1                                      | Stromal cell-derived factor 1                                 | P48061 | CXCL12    | NA | Inverse variance weighted | 7  | -0.042 | 0.132 | 7.522E-01 | 0.974 | pan | Severe COVID-19 |
| 3196_6    | HPLN1                                      | Hyaluronan and proteoglycan link protein 1                    | P10915 | HAPLN1    | NA | Inverse variance weighted | 3  | 0.038  | 0.121 | 7.523E-01 | 0.974 | pan | Severe COVID-19 |
| 8304_50   | OPG                                        | Tumor necrosis factor receptor superfamily member 11B         | O00300 | TNFRSF11B | NA | Inverse variance weighted | 3  | -0.026 | 0.084 | 7.524E-01 | 0.974 | pan | Severe COVID-19 |
| 13427_66  | MA1C1                                      | Mannosyl-oligosaccharide 1,2-alpha-mannosidase IC             | Q9NR34 | MAN1C1    | NA | Inverse variance weighted | 4  | -0.082 | 0.259 | 7.525E-01 | 0.974 | pan | Severe COVID-19 |
| 13998_26  | PURA1                                      | Adenylosuccinate synthetase isozyme 1                         | Q8N142 | ADSS1     | NA | Inverse variance weighted | 3  | -0.026 | 0.084 | 7.528E-01 | 0.974 | pan | Severe COVID-19 |
| 12812_25  | ACYP2                                      | Acylphosphatase-2                                             | P14621 | ACYP2     | NA | Inverse variance weighted | 2  | 0.021  | 0.066 | 7.528E-01 | 0.974 | pan | Severe COVID-19 |
| 14309_8   | HNRH1                                      | Heterogeneous nuclear ribonucleoprotein H                     | P31943 | HNRNPH1   | NA | Wald ratio                | 1  | 0.102  | 0.324 | 7.539E-01 | 0.974 | pan | Severe COVID-19 |
| 13102_1   | FAM3D                                      | Protein FAM3D                                                 | Q968Q1 | FAM3D     | NA | Inverse variance weighted | 9  | -0.016 | 0.052 | 7.543E-01 | 0.974 | pan | Severe COVID-19 |
| 8459_10   | BMP-6                                      | Bone morphogenetic protein 6                                  | P22004 | BMP6      | NA | Inverse variance weighted | 3  | -0.049 | 0.158 | 7.544E-01 | 0.974 | pan | Severe COVID-19 |
| 13597_20  | RAB31                                      | Ras-related protein Rab-31                                    | Q13636 | RAB31     | NA | Inverse variance weighted | 3  | 0.098  | 0.312 | 7.545E-01 | 0.974 | pan | Severe COVID-19 |
| 7038_45   | SIABD                                      | CMP-N-acetylneuraminate-poly-alpha-2,8-sialyltransferase      | Q92187 | ST8SIA4   | NA | Wald ratio                | 1  | 0.134  | 0.429 | 7.546E-01 | 0.974 | pan | Severe COVID-19 |
| 7638_30   | Lectin, mannose-binding 2                  | Vesicular integral-membrane protein VIP36                     | Q12907 | LMAN2     | NA | Inverse variance weighted | 2  | 0.087  | 0.278 | 7.547E-01 | 0.974 | pan | Severe COVID-19 |
| 15364_101 | Apo C-I                                    | Apolipoprotein C-I                                            | P02654 | APOC1     | NA | Inverse variance weighted | 2  | -0.122 | 0.391 | 7.553E-01 | 0.974 | pan | Severe COVID-19 |
| 16309_30  | Soggy-1                                    | Dickkopf-like protein 1                                       | Q9UK85 | DKK1      | NA | Wald ratio                | 1  | 0.119  | 0.381 | 7.554E-01 | 0.974 | pan | Severe COVID-19 |
| 9715_15   | IGSF3                                      | Immunoglobulin superfamily member 3                           | O75054 | IGSF3     | NA | Inverse variance weighted | 5  | 0.055  | 0.176 | 7.556E-01 | 0.974 | pan | Severe COVID-19 |
| 11264_33  | XDH                                        | Xanthine dehydrogenase/oxidase                                | P47989 | XDH       | NA | Wald ratio                | 1  | 0.100  | 0.322 | 7.557E-01 | 0.974 | pan | Severe COVID-19 |
| 14047_78  | BDNF                                       | Brain-derived neurotrophic factor                             | P23560 | BDNF      | NA | Inverse variance weighted | 2  | 0.091  | 0.293 | 7.560E-01 | 0.974 | pan | Severe COVID-19 |
| 15526_33  | GSHB                                       | Glutathione synthetase                                        | P48637 | GSS       | NA | Inverse variance weighted | 4  | 0.040  | 0.130 | 7.570E-01 | 0.975 | pan | Severe COVID-19 |
| 10514_5   | PGD2 synthase                              | Prostaglandin-H2 D-isomerase                                  | P41222 | PTGDS     | NA | Inverse variance weighted | 2  | -0.114 | 0.370 | 7.579E-01 | 0.975 | pan | Severe COVID-19 |
| 3186_2    | C2                                         | Complement C2                                                 | P06681 | C2        | NA | Inverse variance weighted | 9  | 0.024  | 0.079 | 7.580E-01 | 0.975 | pan | Severe COVID-19 |
| 4886_3    | MCP-3                                      | C-C motif chemokine 7                                         | P80098 | CCL7      | NA | Inverse variance weighted | 5  | -0.019 | 0.062 | 7.593E-01 | 0.976 | pan | Severe COVID-19 |
| 6391_52   | LIRA3                                      | Leukocyte immunoglobulin-like receptor subfamily A member 3   | Q8N6C8 | LILRA3    | NA | Inverse variance weighted | 8  | 0.018  | 0.061 | 7.602E-01 | 0.976 | pan | Severe COVID-19 |
| 9713_67   | PGFRL                                      | Platelet-derived growth factor receptor-like protein          | Q15198 | PDGFRL    | NA | Inverse variance weighted | 6  | -0.013 | 0.043 | 7.610E-01 | 0.976 | pan | Severe COVID-19 |
| 9322_15   | RCN1                                       | Reticulocalbin-1                                              | Q15293 | RCN1      | NA | Inverse variance weighted | 2  | -0.067 | 0.221 | 7.617E-01 | 0.976 | pan | Severe COVID-19 |
| 15446_25  | SMDF                                       | Neuregulin-1, sensory and motor neuron-derived factor isoform | Q02297 | NRG1      | NA | Inverse variance weighted | 2  | -0.048 | 0.159 | 7.631E-01 | 0.976 | pan | Severe COVID-19 |
| 19261_12  | SDCB2                                      | Syntenin-2                                                    | Q9H190 | SDCBP2    | NA | Wald ratio                | 1  | 0.082  | 0.274 | 7.641E-01 | 0.976 | pan | Severe COVID-19 |
| 12571_14  | ARL3                                       | ADP-ribosylation factor-like protein 3                        | P36405 | ARL3      | NA | Inverse variance weighted | 2  | -0.075 | 0.250 | 7.643E-01 | 0.976 | pan | Severe COVID-19 |
| 6448_36   | Sema E                                     | Semaphorin-3C                                                 | Q99985 | SEMA3C    | NA | Inverse variance weighted | 2  | 0.040  | 0.133 | 7.644E-01 | 0.976 | pan | Severe COVID-19 |
| 14655_1   | DJC17                                      | Dnal homolog subfamily C member 17                            | Q9NVM6 | DNAJC17   | NA | Inverse variance weighted | 4  | -0.033 | 0.109 | 7.649E-01 | 0.976 | pan | Severe COVID-19 |
| 2944_66   | DAN                                        | Neuroblastoma suppressor of tumorigenicity 1                  | P41271 | NBL1      | NA | Wald ratio                | 1  | -0.110 | 0.369 | 7.659E-01 | 0.976 | pan | Severe COVID-19 |
| 6580_29   | Pregnancy zone protein                     | Pregnancy zone protein                                        | P20742 | PZP       | NA | Inverse variance weighted | 5  | -0.041 | 0.137 | 7.669E-01 | 0.976 | pan | Severe COVID-19 |
| 13399_33  | RELL1                                      | RELt-like protein 1                                           | Q8IUW5 | RELL1     | NA | Inverse variance weighted | 2  | 0.037  | 0.126 | 7.682E-01 | 0.976 | pan | Severe COVID-19 |
| 18876_77  | CHST4                                      | Carbohydrate sulfotransferase 4                               | Q8NCG5 | CHST4     | NA | Wald ratio                | 1  | 0.120  | 0.410 | 7.700E-01 | 0.976 | pan | Severe COVID-19 |
| 19631_13  | Kininostatin                               | Kininostatin                                                  | P01042 | KNG1      | NA | Inverse variance weighted | 12 | -0.033 | 0.112 | 7.703E-01 | 0.976 | pan | Severe COVID-19 |
| 18189_12  | VPS25                                      | Vacuolar protein-sorting-associated protein 25                | Q9BRG1 | VPS25     | NA | Inverse variance weighted | 2  | 0.058  | 0.200 | 7.703E-01 | 0.976 | pan | Severe COVID-19 |
| 12671_35  | ST1B1                                      | Sulfotransferase family cytosolic 1B member 1                 | O43704 | SULT1B1   | NA | Inverse variance weighted | 6  | -0.031 | 0.106 | 7.712E-01 | 0.976 | pan | Severe COVID-19 |
| 17456_53  | GOLM1                                      | Golgi membrane protein 1                                      | Q8NB14 | GOLM1     | NA | Inverse variance weighted | 6  | 0.028  | 0.096 | 7.715E-01 | 0.976 | pan | Severe COVID-19 |
| 9876_20   | aldolase C                                 | Fructose-bisphosphate aldolase C                              | P09972 | ALDOC     | NA | Inverse variance weighted | 3  | -0.077 | 0.264 | 7.717E-01 | 0.976 | pan | Severe COVID-19 |
| 15610_72  | LAP                                        | Cytosol aminopeptidase                                        | P28838 | LAP3      | NA | Inverse variance weighted | 2  | 0.074  | 0.254 | 7.720E-01 | 0.976 | pan | Severe COVID-19 |
| 11872_9   | PCDGD                                      | Protocadherin gamma-B1                                        | Q9Y5G3 | PCDHGB1   | NA | Inverse variance weighted | 2  | 0.087  | 0.299 | 7.720E-01 | 0.976 | pan | Severe COVID-19 |
| 5066_134  | CLM6                                       | CMRF35-like molecule 6                                        | Q08708 | CD300C    | NA | Inverse variance weighted | 13 | -0.023 | 0.078 | 7.720E-01 | 0.976 | pan | Severe COVID-19 |
| 12635_9   | TRDMT                                      | tRNA (cytosine-38)-C(5)-methyltransferase                     | O14717 | TRDMT1    | NA | Inverse variance weighted | 4  | -0.022 | 0.076 | 7.726E-01 | 0.976 | pan | Severe COVID-19 |
| 12662_82  | ECH1                                       | Delta(3,5)-Delta(2,4)-dienoyl-CoA isomerase, mitochondrial    | Q13011 | ECH1      | NA | Inverse variance weighted | 2  | 0.035  | 0.120 | 7.734E-01 | 0.976 | pan | Severe COVID-19 |
| 6918_183  | CKKN                                       | Cholecystokinin                                               | P06307 | CCK       | NA | Inverse variance weighted | 2  | -0.152 | 0.528 | 7.734E-01 | 0.976 | pan | Severe COVID-19 |
| 11910_27  | DLX4                                       | Homeobox protein DLX-4                                        | Q92988 | DLX4      | NA | Inverse variance weighted | 2  | 0.054  | 0.188 | 7.738E-01 | 0.976 | pan | Severe COVID-19 |
| 6625_31   | ATAD1                                      | ATPase family AAA domain-containing protein 1                 | Q8NBU5 | ATAD1     | NA | Wald ratio                | 1  | 0.033  | 0.113 | 7.740E-01 | 0.976 | pan | Severe COVID-19 |
| 9986_14   | Neuropeptide W                             | Neuropeptide W                                                | Q8N729 | NPW       | NA | Inverse variance weighted | 5  | -0.022 | 0.075 | 7.745E-01 | 0.976 | pan | Severe COVID-19 |
| 10053_5   | ILK1                                       | Integrin-linked protein kinase                                | Q13418 | ILK       | NA | Wald ratio                | 1  | 0.077  | 0.269 | 7.749E-01 | 0.976 | pan | Severe COVID-19 |
| 18326_50  | MAGA8                                      | Melanoma-associated antigen 8                                 | P43361 | MAGEA8    | NA | Wald ratio                | 1  | 0.100  | 0.349 | 7.751E-01 | 0.976 | pan | Severe COVID-19 |
| 9183_7    | IFN-a/b R1                                 | Interferon alpha/beta receptor 1                              | P17181 | IFNAR1    | NA | Inverse variance weighted | 9  | 0.010  | 0.037 | 7.755E-01 | 0.976 | pan | Severe COVID-19 |
| 3311_27   | FCG3B                                      | Low affinity immunoglobulin gamma Fc region receptor III-B    | O75015 | FCGR3B    | NA | Inverse variance weighted | 8  | 0.035  | 0.125 | 7.758E-01 | 0.976 | pan | Severe COVID-19 |
| 15523_9   | HEM2                                       | Delta-aminolevulinic acid dehydratase                         | P13716 | ALAD      | NA | Inverse variance weighted | 8  | -0.016 | 0.056 | 7.768E-01 | 0.976 | pan | Severe COVID-19 |
| 13982_33  | RGS18                                      | Regulator of G-protein signaling 18                           | Q9NS28 | RGS18     | NA | Wald ratio                | 1  | -0.071 | 0.252 | 7.770E-01 | 0.976 | pan | Severe COVID-19 |
| 11428_31  | PDLI1                                      | PDZ and LIM domain protein 1                                  | O00151 | PDLM1     | NA | Wald ratio                | 1  | 0.059  | 0.209 | 7.784E-01 | 0.976 | pan | Severe COVID-19 |
| 9848_22   | Cyclin H                                   | Cyclin-H                                                      | P51946 | CNH       | NA | Wald ratio                | 1  | 0.050  | 0.178 | 7.786E-01 | 0.976 | pan | Severe COVID-19 |
| 18180_58  | RT4I1                                      | Reticulon-4-interacting protein 1, mitochondrial              | Q8WWV3 | RTN4IP1   | NA | Wald ratio                | 1  | 0.069  | 0.245 | 7.787E-01 | 0.976 | pan | Severe COVID-19 |
| 12594_5   | GRAN                                       | Grancalcin                                                    | P28676 | GCA       | NA | Inverse variance weighted | 2  | 0.017  | 0.061 | 7.793E-01 | 0.976 | pan | Severe COVID-19 |
| 15312_14  | AGO1                                       | Protein argonaute-1                                           | Q9UL18 | AGO1      | NA | Wald ratio                | 1  | 0.077  | 0.278 | 7.807E-01 | 0.976 | pan | Severe COVID-19 |
| 19159_9   | DNA polymerase subunit delta 4             | DNA polymerase delta subunit 4                                | Q9HCU8 | POLD4     | NA | Wald ratio                | 1  | 0.095  | 0.341 | 7.811E-01 | 0.976 | pan | Severe COVID-19 |
| 12366_16  | CRGD                                       | Gamma-crystallin D                                            | P07320 | CRYGD     | NA | Wald ratio                | 1  | -0.039 | 0.141 | 7.813E-01 | 0.976 | pan | Severe COVID-19 |
| 7897_75   | DLG3                                       | Disks large homolog 3                                         | Q92796 | DLG3      | NA | Inverse variance weighted | 5  | 0.056  | 0.201 | 7.816E-01 | 0.976 | pan | Severe COVID-19 |
| 10056_5   | FOXN1                                      | Forkhead box protein M1                                       | Q08050 | FOXN1     | NA | Wald ratio                | 1  | 0.051  | 0.185 | 7.820E-01 | 0.976 | pan | Severe COVID-19 |
| 10088_37  | APT                                        | Adenine phosphoribosyltransferase                             | P07741 | APRT      | NA | Inverse variance weighted | 7  | -0.019 | 0.069 | 7.824E-01 | 0.976 | pan | Severe COVID-19 |
| 6453_70   | LIRB4                                      | Leukocyte immunoglobulin-like receptor subfamily B member 4   | Q8NHJ6 | LILRB4    | NA | Inverse variance weighted | 2  | 0.056  | 0.203 | 7.830E-01 | 0.976 | pan | Severe COVID-19 |
| 19145_4   | MREG                                       | Melanoregulin                                                 | Q8NS65 | MREG      | NA | Inverse variance weighted | 3  | 0.043  | 0.155 | 7.833E-01 | 0.976 | pan | Severe COVID-19 |
| 7628_40   | CREL1                                      | Cysteine-rich with EGF-like domain protein 1                  | Q96HD1 | CRELD1    | NA | Inverse variance weighted | 13 | 0.011  | 0.039 | 7.838E-01 | 0.976 | pan | Severe COVID-19 |
| 15522_2   | GAPR1                                      | Golgi-associated plant pathogenesis-related protein 1         | Q9HAG4 | GLIPR2    | NA | Inverse variance weighted | 6  | 0.026  | 0.095 | 7.841E-01 | 0.976 | pan | Severe COVID-19 |
| 12620_3   | Septin-11                                  | Septin-11                                                     | Q9NVA2 | SEPTIN11  | NA | Inverse variance weighted | 2  | 0.052  | 0.189 | 7.846E-01 | 0.976 | pan | Severe COVID-19 |
| 6457_50   | PCDG1                                      | Protocadherin gamma-A1                                        | Q9Y5H4 | PCDHGA1   | NA | Inverse variance weighted | 12 | -0.022 | 0.079 | 7.852E-01 | 0.976 | pan | Severe COVID-19 |

|           |                                  |                                                                        |        |          |    |                           |    |        |       |           |       |     |                 |
|-----------|----------------------------------|------------------------------------------------------------------------|--------|----------|----|---------------------------|----|--------|-------|-----------|-------|-----|-----------------|
| 3583_54   | Arylsulfatase A                  | Arylsulfatase A                                                        | P15289 | ARSA     | NA | Wald ratio                | 1  | -0.050 | 0.183 | 7.856E-01 | 0.976 | pan | Severe COVID-19 |
| 12450_42  | PMVK                             | Phosphomevalonate kinase                                               | Q15126 | PMVK     | NA | Inverse variance weighted | 2  | 0.173  | 0.639 | 7.860E-01 | 0.976 | pan | Severe COVID-19 |
| 18434_141 | TBPL1                            | TATA box-binding protein-like protein 1                                | P62380 | TBPL1    | NA | Inverse variance weighted | 3  | -0.046 | 0.168 | 7.861E-01 | 0.976 | pan | Severe COVID-19 |
| 15495_9   | FOLR3                            | Folate receptor gamma                                                  | P41439 | FOLR3    | NA | Inverse variance weighted | 15 | -0.012 | 0.045 | 7.862E-01 | 0.976 | pan | Severe COVID-19 |
| 8962_48   | KS6B1                            | Ribosomal protein S6 kinase beta-1                                     | P23443 | RP56KB1  | NA | Inverse variance weighted | 4  | 0.068  | 0.250 | 7.863E-01 | 0.976 | pan | Severe COVID-19 |
| 16785_45  | HD-5                             | Defensin-5                                                             | Q01523 | DEFA5    | NA | Inverse variance weighted | 17 | -0.015 | 0.056 | 7.865E-01 | 0.976 | pan | Severe COVID-19 |
| 17748_21  | QORX                             | Quinone oxidoreductase PIG3                                            | Q53FA7 | TP53I3   | NA | Inverse variance weighted | 10 | 0.015  | 0.056 | 7.871E-01 | 0.976 | pan | Severe COVID-19 |
| 13118_5   | SMOC1                            | SPARC-related modular calcium-binding protein 1                        | Q9H4F8 | SMOC1    | NA | Inverse variance weighted | 3  | -0.019 | 0.072 | 7.876E-01 | 0.976 | pan | Severe COVID-19 |
| 18319_7   | ODPX                             | Pyruvate dehydrogenase protein X component, mitochondrial              | O00330 | PDHX     | NA | Wald ratio                | 1  | -0.054 | 0.200 | 7.883E-01 | 0.976 | pan | Severe COVID-19 |
| 4232_19   | IGF-I sR                         | Insulin-like growth factor 1 receptor                                  | P08069 | IGF1R    | NA | Inverse variance weighted | 2  | 0.092  | 0.344 | 7.883E-01 | 0.976 | pan | Severe COVID-19 |
| 9451_20   | Uromodulin                       | Uromodulin                                                             | P07911 | UMOD     | NA | Wald ratio                | 1  | 0.103  | 0.385 | 7.884E-01 | 0.976 | pan | Severe COVID-19 |
| 18387_7   | suppression of tumorigenicity 13 | Hsc70-interacting protein                                              | P50502 | ST13     | NA | Wald ratio                | 1  | -0.075 | 0.280 | 7.891E-01 | 0.976 | pan | Severe COVID-19 |
| 4440_15   | FCRL3                            | Fc receptor-like protein 3                                             | Q96P31 | FCRL3    | NA | Inverse variance weighted | 5  | -0.028 | 0.103 | 7.891E-01 | 0.976 | pan | Severe COVID-19 |
| 10974_20  | ISK7                             | Serine protease inhibitor Kazal-type 7                                 | P58062 | SPINK7   | NA | Inverse variance weighted | 5  | -0.030 | 0.112 | 7.894E-01 | 0.976 | pan | Severe COVID-19 |
| 6470_19   | fibulin 1                        | Fibulin-1                                                              | P23142 | FBLN1    | NA | Inverse variance weighted | 4  | 0.030  | 0.114 | 7.895E-01 | 0.976 | pan | Severe COVID-19 |
| 5939_42   | TWEAK                            | Tumor necrosis factor ligand superfamily member 12                     | O43508 | TNFSF12  | NA | Inverse variance weighted | 3  | -0.062 | 0.233 | 7.896E-01 | 0.976 | pan | Severe COVID-19 |
| 8866_53   | QPCTL                            | Glutaminyl-peptide cyclotransferase-like protein                       | Q9NXS2 | QPCTL    | NA | Inverse variance weighted | 7  | -0.015 | 0.058 | 7.906E-01 | 0.976 | pan | Severe COVID-19 |
| 9545_156  | Granzyme K                       | Granzyme K                                                             | P49863 | GZMK     | NA | Inverse variance weighted | 3  | -0.033 | 0.123 | 7.906E-01 | 0.976 | pan | Severe COVID-19 |
| 12934_1   | HERC5                            | E3 ISG15--protein ligase HERC5                                         | Q9UII4 | HERC5    | NA | Wald ratio                | 1  | 0.108  | 0.406 | 7.909E-01 | 0.976 | pan | Severe COVID-19 |
| 17514_48  | RAB21                            | Ras-related protein Rab-21                                             | Q9UL25 | RAB21    | NA | Wald ratio                | 1  | -0.042 | 0.160 | 7.911E-01 | 0.976 | pan | Severe COVID-19 |
| 11187_11  | CL12A                            | C-type lectin domain family 12 member A                                | Q5QG29 | CLEC12A  | NA | Inverse variance weighted | 7  | 0.019  | 0.072 | 7.915E-01 | 0.976 | pan | Severe COVID-19 |
| 11214_40  | DNJB9                            | DnaI homolog subfamily B member 9                                      | Q9UB53 | DNABJ9   | NA | Wald ratio                | 1  | -0.077 | 0.290 | 7.916E-01 | 0.976 | pan | Severe COVID-19 |
| 9211_19   | PEDF                             | Pigment epithelium-derived factor                                      | P36955 | SERPINF1 | NA | Inverse variance weighted | 6  | 0.015  | 0.056 | 7.917E-01 | 0.976 | pan | Severe COVID-19 |
| 5604_30   | HPSE                             | Heparanase                                                             | Q9Y251 | HPSE     | NA | Inverse variance weighted | 2  | 0.046  | 0.176 | 7.923E-01 | 0.977 | pan | Severe COVID-19 |
| 14107_1   | MTHFS                            | 5-formyltetrahydrofolate cyclo-ligase                                  | P49914 | MTHFS    | NA | Inverse variance weighted | 6  | -0.013 | 0.051 | 7.935E-01 | 0.977 | pan | Severe COVID-19 |
| 4959_2    | AGR2                             | Anterior gradient protein 2 homolog                                    | O95994 | AGR2     | NA | Wald ratio                | 1  | 0.066  | 0.254 | 7.937E-01 | 0.977 | pan | Severe COVID-19 |
| 9191_8    | Trefoil factor 2                 | Trefoil factor 2                                                       | Q03403 | TFF2     | NA | Inverse variance weighted | 4  | -0.030 | 0.114 | 7.949E-01 | 0.977 | pan | Severe COVID-19 |
| 15486_126 | ABP1                             | Amiloride-sensitive amine oxidase [copper-containing]                  | P19801 | AOC1     | NA | Inverse variance weighted | 12 | -0.007 | 0.027 | 7.951E-01 | 0.977 | pan | Severe COVID-19 |
| 2834_54   | kalikrein 8                      | Kallikrein-8                                                           | O60259 | KLK8     | NA | Inverse variance weighted | 2  | -0.054 | 0.207 | 7.958E-01 | 0.977 | pan | Severe COVID-19 |
| 4155_3    | Tenascin                         | Tenascin                                                               | P24821 | TNC      | NA | Inverse variance weighted | 12 | -0.015 | 0.058 | 7.965E-01 | 0.977 | pan | Severe COVID-19 |
| 13088_397 | BTC                              | Betacellulin                                                           | P35070 | BTC      | NA | Inverse variance weighted | 2  | -0.023 | 0.089 | 7.966E-01 | 0.977 | pan | Severe COVID-19 |
| 9197_4    | LEG9                             | Galectin-9                                                             | O00182 | LGALS9   | NA | Wald ratio                | 1  | -0.035 | 0.136 | 7.970E-01 | 0.977 | pan | Severe COVID-19 |
| 3325_2    | MATN2                            | Matrilin-2                                                             | O00339 | MATN2    | NA | Inverse variance weighted | 4  | 0.027  | 0.107 | 7.978E-01 | 0.977 | pan | Severe COVID-19 |
| 8428_102  | NTRI                             | Neurotrimin                                                            | Q9P121 | NTM      | NA | Inverse variance weighted | 4  | -0.032 | 0.126 | 7.982E-01 | 0.977 | pan | Severe COVID-19 |
| 17712_7   | ID1                              | Isopentenyl-diphosphate Delta-isomerase 1                              | Q13907 | ID1      | NA | Wald ratio                | 1  | 0.055  | 0.214 | 7.983E-01 | 0.977 | pan | Severe COVID-19 |
| 5061_27   | B7-H2                            | ICOS ligand                                                            | O75144 | ICOSLG   | NA | Inverse variance weighted | 2  | 0.094  | 0.368 | 7.990E-01 | 0.977 | pan | Severe COVID-19 |
| 5599_88   | PCYXL                            | Prenylcysteine oxidase-like                                            | Q8NBM8 | PCVOX1L  | NA | Wald ratio                | 1  | -0.054 | 0.213 | 7.992E-01 | 0.977 | pan | Severe COVID-19 |
| 4971_1    | CATZ                             | Cathepsin Z                                                            | Q9UBR2 | CTSZ     | NA | Inverse variance weighted | 6  | -0.012 | 0.047 | 7.993E-01 | 0.977 | pan | Severe COVID-19 |
| 18244_1   | ANXA7                            | Annexin A7                                                             | P20073 | ANXA7    | NA | Wald ratio                | 1  | 0.089  | 0.352 | 8.005E-01 | 0.978 | pan | Severe COVID-19 |
| 8258_22   | UXS1                             | UDP-glucuronic acid decarboxylase 1                                    | Q8NBZ7 | UXS1     | NA | Inverse variance weighted | 2  | 0.075  | 0.298 | 8.009E-01 | 0.978 | pan | Severe COVID-19 |
| 8039_41   | F177A                            | Protein FAM177A1                                                       | Q8N128 | FAM177A1 | NA | Inverse variance weighted | 7  | 0.010  | 0.040 | 8.024E-01 | 0.979 | pan | Severe COVID-19 |
| 4549_78   | FUT5                             | Alpha-(1,3)-fucosyltransferase 5                                       | Q11128 | FUT5     | NA | Inverse variance weighted | 10 | 0.012  | 0.049 | 8.025E-01 | 0.979 | pan | Severe COVID-19 |
| 9599_6    | PIANP                            | PIR alpha-associated neural protein                                    | Q8IYJ0 | PIANP    | NA | Wald ratio                | 1  | -0.082 | 0.328 | 8.031E-01 | 0.979 | pan | Severe COVID-19 |
| 10615_18  | MYP0                             | Myelin protein P0                                                      | P25189 | MPZ      | NA | Inverse variance weighted | 14 | 0.012  | 0.048 | 8.031E-01 | 0.979 | pan | Severe COVID-19 |
| 4127_75   | C6                               | Complement component C6                                                | P13671 | C6       | NA | Inverse variance weighted | 2  | 0.030  | 0.120 | 8.039E-01 | 0.979 | pan | Severe COVID-19 |
| 19557_3   | KLOTB                            | Beta-klotho                                                            | Q86214 | KL8      | NA | Inverse variance weighted | 11 | 0.010  | 0.039 | 8.044E-01 | 0.979 | pan | Severe COVID-19 |
| 6402_8    | PILRA isoform FDF03-deltaTM      | Paired immunoglobulin-like type 2 receptor alpha isoform FDF03-deltaTM | Q9UK11 | PILRA    | NA | Inverse variance weighted | 14 | -0.025 | 0.102 | 8.049E-01 | 0.979 | pan | Severe COVID-19 |
| 5493_17   | WNK3                             | Serine/threonine-protein kinase WNK3                                   | Q9BYP7 | WNK3     | NA | Wald ratio                | 1  | 0.073  | 0.298 | 8.066E-01 | 0.980 | pan | Severe COVID-19 |
| 2823_7    | COMMD7                           | COMM domain-containing protein 7                                       | Q86VK2 | COMMD7   | NA | Wald ratio                | 1  | -0.048 | 0.197 | 8.066E-01 | 0.980 | pan | Severe COVID-19 |
| 3825_18   | MK08                             | Mitogen-activated protein kinase 8                                     | P45983 | MAPK8    | NA | Inverse variance weighted | 3  | -0.032 | 0.131 | 8.068E-01 | 0.980 | pan | Severe COVID-19 |
| 19197_95  | THIL                             | Acetyl-CoA acetyltransferase, mitochondrial                            | P24752 | ACAT1    | NA | Inverse variance weighted | 3  | 0.047  | 0.191 | 8.073E-01 | 0.980 | pan | Severe COVID-19 |
| 13472_35  | HDHD2                            | Haloacid dehalogenase-like hydrolase domain-containing protein 2       | Q9H0R4 | HDHD2    | NA | Inverse variance weighted | 3  | 0.020  | 0.083 | 8.082E-01 | 0.980 | pan | Severe COVID-19 |
| 12334_25  | cSHMT                            | Serine hydroxymethyltransferase, cytosolic                             | P34896 | SHMT1    | NA | Inverse variance weighted | 12 | 0.008  | 0.034 | 8.102E-01 | 0.980 | pan | Severe COVID-19 |
| 13114_50  | Lumican                          | Lumican                                                                | P51884 | LUM      | NA | Inverse variance weighted | 9  | -0.011 | 0.046 | 8.119E-01 | 0.980 | pan | Severe COVID-19 |
| 12517_52  | TFAR19                           | Programmed cell death protein 5                                        | O14737 | PDCD5    | NA | Inverse variance weighted | 5  | -0.026 | 0.112 | 8.136E-01 | 0.980 | pan | Severe COVID-19 |
| 16307_22  | UNC5H4                           | Netrin receptor UNC5D                                                  | Q6UX24 | UNC5D    | NA | Inverse variance weighted | 3  | -0.037 | 0.155 | 8.137E-01 | 0.980 | pan | Severe COVID-19 |
| 9018_38   | PCD10:ECD                        | Protocadherin-10:Extracellular domain                                  | Q9P2E7 | PCDH10   | NA | Inverse variance weighted | 3  | 0.020  | 0.084 | 8.140E-01 | 0.980 | pan | Severe COVID-19 |
| 8780_2    | PCD10:CD                         | Protocadherin-10:Cytoplasmic domain                                    | Q9P2E7 | PCDH10   | NA | Inverse variance weighted | 6  | 0.021  | 0.088 | 8.146E-01 | 0.980 | pan | Severe COVID-19 |
| 12657_2   | FCL                              | GDP-L-fucose synthase                                                  | Q13630 | GFUS     | NA | Wald ratio                | 1  | -0.083 | 0.353 | 8.147E-01 | 0.980 | pan | Severe COVID-19 |
| 9201_13   | Transgelin-2                     | Transgelin-2                                                           | P37802 | TAGLN2   | NA | Wald ratio                | 1  | 0.077  | 0.330 | 8.154E-01 | 0.980 | pan | Severe COVID-19 |
| 8024_64   | TPST2                            | Protein-tyrosine sulfotransferase 2                                    | O60704 | TPST2    | NA | Inverse variance weighted | 2  | 0.030  | 0.129 | 8.159E-01 | 0.980 | pan | Severe COVID-19 |
| 9940_35   | DUS28                            | Dual specificity phosphatase 28                                        | Q4GOW2 | DUSP28   | NA | Inverse variance weighted | 3  | 0.056  | 0.242 | 8.160E-01 | 0.980 | pan | Severe COVID-19 |
| 3903_49   | Sorting nexin 4                  | Sorting nexin-4                                                        | O95219 | SNX4     | NA | Inverse variance weighted | 2  | -0.038 | 0.165 | 8.161E-01 | 0.980 | pan | Severe COVID-19 |
| 5740_17   | ROBO1                            | Roundabout homolog 1                                                   | Q9Y6N7 | ROBO1    | NA | Inverse variance weighted | 6  | 0.019  | 0.080 | 8.163E-01 | 0.980 | pan | Severe COVID-19 |
| 6390_18   | NP5                              | Neuropeptide 5                                                         | POC0P6 | NP5      | NA | Inverse variance weighted | 2  | 0.077  | 0.330 | 8.163E-01 | 0.980 | pan | Severe COVID-19 |
| 5628_21   | SEM3G                            | Semaphorin-3G                                                          | Q9NS98 | SEMA3G   | NA | Inverse variance weighted | 6  | -0.039 | 0.168 | 8.167E-01 | 0.980 | pan | Severe COVID-19 |
| 15615_8   | ILRB3                            | Leukocyte immunoglobulin-like receptor subfamily B member 3            | O75022 | ILRB3    | NA | Inverse variance weighted | 4  | 0.015  | 0.064 | 8.169E-01 | 0.980 | pan | Severe COVID-19 |
| 10800_15  | Collagen-binding protein         | Serpin H1                                                              | P50454 | SERPINH1 | NA | Inverse variance weighted | 4  | 0.026  | 0.114 | 8.172E-01 | 0.980 | pan | Severe COVID-19 |
| 8221_19   | MIF                              | Macrophage migration inhibitory factor                                 | P14174 | MIF      | NA | Wald ratio                | 1  | 0.096  | 0.419 | 8.182E-01 | 0.980 | pan | Severe COVID-19 |
| 18236_3   | LEGL                             | Galectin-related protein                                               | Q32CW2 | LGALS1   | NA | Wald ratio                | 1  | 0.045  | 0.194 | 8.184E-01 | 0.980 | pan | Severe COVID-19 |
| 5363_51   | Semaphorin 3E                    | Semaphorin-3E                                                          | O15041 | SEMA3E   | NA | Inverse variance weighted | 24 | -0.008 | 0.033 | 8.186E-01 | 0.980 | pan | Severe COVID-19 |
| 7050_5    | NEGR1                            | Neuronal growth regulator 1                                            | Q7Z3B1 | NEGR1    | NA | Wald ratio                | 1  | 0.078  | 0.341 | 8.188E-01 | 0.980 | pan | Severe COVID-19 |
| 6107_3    | ELA1                             | Chymotrypsin-like elastase family member 1                             | Q9UNI1 | CELA1    | NA | Inverse variance weighted | 13 | -0.012 | 0.052 | 8.189E-01 | 0.980 | pan | Severe COVID-19 |
| 18175_65  | VAT1                             | Synaptic vesicle membrane protein VAT-1 homolog                        | Q99536 | VAT1     | NA | Inverse variance weighted | 2  | -0.050 | 0.218 | 8.190E-01 | 0.980 | pan | Severe COVID-19 |
| 16763_11  | LECT2                            | Leukocyte cell-derived chemotaxin-2                                    | O14960 | LECT2    | NA | Inverse variance weighted | 10 | -0.011 | 0.048 | 8.193E-01 | 0.980 | pan | Severe COVID-19 |
| 11369_23  | ADHX                             | Alcohol dehydrogenase class-3                                          | P11766 | ADH5     | NA | Inverse variance weighted | 4  | -0.050 | 0.218 | 8.199E-01 | 0.980 | pan | Severe COVID-19 |
| 9880_33   | T230                             | Tryptophan 2,3-dioxygenase                                             | P48775 | TDO2     | NA | Inverse variance weighted | 7  | -0.025 | 0.110 | 8.200E-01 | 0.980 | pan | Severe COVID-19 |
| 8007_19   | Cathepsin B                      | Cathepsin B                                                            | P07858 | CTSB     | NA | Inverse variance weighted | 10 | -0.012 | 0.054 | 8.216E-01 | 0.980 | pan | Severe COVID-19 |

|           |                                  |                                                                             |        |          |    |                           |    |        |       |           |       |     |                 |
|-----------|----------------------------------|-----------------------------------------------------------------------------|--------|----------|----|---------------------------|----|--------|-------|-----------|-------|-----|-----------------|
| 10714_7   | ACE                              | Angiotensin-converting enzyme                                               | P12821 | ACE      | NA | Inverse variance weighted | 13 | -0.006 | 0.025 | 8.229E-01 | 0.980 | pan | Severe COVID-19 |
| 7208_60   | MGAT4C                           | Alpha-1,3-mannosyl-glycoprotein 4-beta-N-acetylglucosaminyltransferase C    | Q9UBM8 | MGAT4C   | NA | Wald ratio                | 1  | 0.055  | 0.247 | 8.235E-01 | 0.980 | pan | Severe COVID-19 |
| 19338_3   | LZIC                             | Protein LZIC                                                                | Q8WZA0 | LZIC     | NA | Wald ratio                | 1  | -0.098 | 0.442 | 8.242E-01 | 0.980 | pan | Severe COVID-19 |
| 5586_66   | MINP1                            | Multiple inositol polyphosphate phosphatase 1                               | Q9UNW1 | MINP1    | NA | Inverse variance weighted | 4  | 0.016  | 0.075 | 8.249E-01 | 0.980 | pan | Severe COVID-19 |
| 13671_40  | Elastase                         | Neutrophil elastase                                                         | P08246 | ELANE    | NA | Inverse variance weighted | 12 | 0.025  | 0.116 | 8.257E-01 | 0.980 | pan | Severe COVID-19 |
| 8019_73   | STMN3                            | Stathmin-3                                                                  | Q9N272 | STMN3    | NA | Wald ratio                | 1  | -0.079 | 0.357 | 8.258E-01 | 0.980 | pan | Severe COVID-19 |
| 8932_1    | ENTP6                            | Ectonucleoside triphosphate diphosphohydrolase 6                            | Q75354 | ENTP6    | NA | Wald ratio                | 1  | 0.064  | 0.290 | 8.258E-01 | 0.980 | pan | Severe COVID-19 |
| 17702_53  | UGT1A1                           | UDP-glucuronosyltransferase 1-1                                             | P22309 | UGT1A1   | NA | Inverse variance weighted | 3  | -0.035 | 0.161 | 8.258E-01 | 0.980 | pan | Severe COVID-19 |
| 12381_26  | CBR1                             | Carbonyl reductase [NADPH] 1                                                | P16152 | CBR1     | NA | Inverse variance weighted | 5  | -0.016 | 0.075 | 8.259E-01 | 0.980 | pan | Severe COVID-19 |
| 3488_64   | Catalase                         | Catalase                                                                    | P04040 | CAT      | NA | Inverse variance weighted | 4  | -0.061 | 0.277 | 8.270E-01 | 0.980 | pan | Severe COVID-19 |
| 9468_8    | Lectin, mannose-binding 2        | Vesicular integral-membrane protein VIP36                                   | Q12907 | LMAN2    | NA | Wald ratio                | 1  | 0.039  | 0.176 | 8.271E-01 | 0.980 | pan | Severe COVID-19 |
| 3855_56   | Peroxioredoxin-1                 | Peroxioredoxin-1                                                            | Q06830 | PRDX1    | NA | Inverse variance weighted | 7  | 0.022  | 0.100 | 8.275E-01 | 0.980 | pan | Severe COVID-19 |
| 8960_3    | LRAP                             | Endoplasmic reticulum aminopeptidase 2                                      | Q6P179 | ERAP2    | NA | Inverse variance weighted | 27 | 0.006  | 0.030 | 8.279E-01 | 0.980 | pan | Severe COVID-19 |
| 6393_63   | Endoplasmic                      | Endoplasmic                                                                 | P14625 | HSP90B1  | NA | Inverse variance weighted | 10 | 0.019  | 0.087 | 8.287E-01 | 0.980 | pan | Severe COVID-19 |
| 3640_14   | RAP                              | alpha-2-macroglobulin receptor-associated protein                           | P30533 | LRPAP1   | NA | Inverse variance weighted | 10 | 0.011  | 0.051 | 8.290E-01 | 0.980 | pan | Severe COVID-19 |
| 4930_21   | Stanniocalcin-1                  | Stanniocalcin-1                                                             | P52823 | STC1     | NA | Inverse variance weighted | 3  | 0.025  | 0.116 | 8.292E-01 | 0.980 | pan | Severe COVID-19 |
| 18311_44  | DCTN6                            | Dynactin subunit 6                                                          | O00399 | DCTN6    | NA | Inverse variance weighted | 2  | -0.037 | 0.171 | 8.300E-01 | 0.980 | pan | Severe COVID-19 |
| 6431_68   | PCYOX                            | Prenylcysteine oxidase 1                                                    | Q9UHG3 | PCYOX1   | NA | Inverse variance weighted | 12 | 0.019  | 0.087 | 8.304E-01 | 0.980 | pan | Severe COVID-19 |
| 12867_40  | DYLT3                            | Dynein light chain Tctex-type 3                                             | P51808 | DYNLT3   | NA | Wald ratio                | 1  | -0.077 | 0.358 | 8.304E-01 | 0.980 | pan | Severe COVID-19 |
| 18225_13  | HEBP1                            | Heme-binding protein 1                                                      | Q9NRV9 | HEBP1    | NA | Inverse variance weighted | 10 | -0.006 | 0.027 | 8.308E-01 | 0.980 | pan | Severe COVID-19 |
| 6570_1    | CODA1                            | Collagen alpha-1(XIII) chain                                                | Q5TAT6 | COL13A1  | NA | Inverse variance weighted | 3  | 0.039  | 0.182 | 8.311E-01 | 0.980 | pan | Severe COVID-19 |
| 14076_74  | Cystatin-5                       | Cystatin-5                                                                  | P01036 | CST4     | NA | Inverse variance weighted | 10 | 0.014  | 0.064 | 8.323E-01 | 0.980 | pan | Severe COVID-19 |
| 14100_63  | C1QC                             | Complement C1q subcomponent subunit C                                       | P02747 | C1QC     | NA | Inverse variance weighted | 15 | -0.011 | 0.054 | 8.325E-01 | 0.980 | pan | Severe COVID-19 |
| 9118_7    | PSD2                             | PH and SEC7 domain-containing protein 2                                     | Q9B0I7 | PSD2     | NA | Inverse variance weighted | 4  | -0.040 | 0.193 | 8.345E-01 | 0.980 | pan | Severe COVID-19 |
| 19236_24  | TCP4                             | Activated RNA polymerase II transcriptional coactivator p15                 | P53999 | SUB1     | NA | Wald ratio                | 1  | 0.067  | 0.321 | 8.349E-01 | 0.980 | pan | Severe COVID-19 |
| 13621_31  | AP2A2                            | AP-2 complex subunit alpha-2                                                | Q94973 | AP2A2    | NA | Wald ratio                | 1  | -0.050 | 0.241 | 8.355E-01 | 0.980 | pan | Severe COVID-19 |
| 10075_75  | ACB06                            | Acyl-CoA-binding domain-containing protein 6                                | Q9BR61 | ACB06    | NA | Wald ratio                | 1  | 0.073  | 0.349 | 8.357E-01 | 0.980 | pan | Severe COVID-19 |
| 8957_72   | XTP3B                            | Endoplasmic reticulum lectin 1                                              | Q96021 | ERLEC1   | NA | Wald ratio                | 1  | 0.045  | 0.221 | 8.372E-01 | 0.980 | pan | Severe COVID-19 |
| 8334_65   | TCP11                            | T-complex protein 11 homolog                                                | Q8WWU5 | TCP11    | NA | Wald ratio                | 1  | 0.060  | 0.294 | 8.378E-01 | 0.980 | pan | Severe COVID-19 |
| 15431_31  | OTCase                           | Ornithine carbamoyltransferase, mitochondrial                               | P00480 | OTC      | NA | Inverse variance weighted | 3  | 0.034  | 0.167 | 8.384E-01 | 0.980 | pan | Severe COVID-19 |
| 6368_9    | CST1L                            | Cystatin-like 1                                                             | Q9H114 | CST1L    | NA | Wald ratio                | 1  | -0.070 | 0.344 | 8.385E-01 | 0.980 | pan | Severe COVID-19 |
| 5727_35   | B3GLT                            | Beta-1,3-glucosyltransferase                                                | Q6Y288 | B3GLCT   | NA | Inverse variance weighted | 2  | -0.018 | 0.089 | 8.386E-01 | 0.980 | pan | Severe COVID-19 |
| 18213_30  | UBE2F                            | NEDD8-conjugating enzyme UBE2F                                              | Q969M7 | UBE2F    | NA | Inverse variance weighted | 2  | 0.035  | 0.172 | 8.387E-01 | 0.980 | pan | Severe COVID-19 |
| 18218_48  | CB032                            | CB1 cannabinoid receptor-interacting protein 1                              | Q96F85 | CNR1P1   | NA | Inverse variance weighted | 10 | 0.009  | 0.046 | 8.398E-01 | 0.980 | pan | Severe COVID-19 |
| 4148_49   | PAPP-A                           | Pappalysin-1                                                                | Q13219 | PAPPA    | NA | Inverse variance weighted | 4  | 0.028  | 0.142 | 8.413E-01 | 0.980 | pan | Severe COVID-19 |
| 18871_24  | AI1F1                            | Allograft inflammatory factor 1-like                                        | Q9BQI0 | AI1F1    | NA | Inverse variance weighted | 7  | -0.007 | 0.037 | 8.417E-01 | 0.980 | pan | Severe COVID-19 |
| 12575_30  | C1TC                             | C-1-tetrahydrofolate synthase, cytoplasmic                                  | P11586 | MTFHD1   | NA | Inverse variance weighted | 5  | 0.022  | 0.112 | 8.418E-01 | 0.980 | pan | Severe COVID-19 |
| 6496_60   | DLK1:ECOD                        | Protein delta homolog 1: Extracellular domain                               | P08370 | DLK1     | NA | Inverse variance weighted | 2  | 0.104  | 0.521 | 8.420E-01 | 0.980 | pan | Severe COVID-19 |
| 5437_63   | FABP                             | Fatty acid-binding protein, heart                                           | P05413 | FABP3    | NA | Inverse variance weighted | 2  | 0.047  | 0.235 | 8.429E-01 | 0.980 | pan | Severe COVID-19 |
| 10037_98  | SIG12:lg-like V-type 2           | Sialic acid-binding lg-like lectin 12:lg-like V-type 2 domain, Isoform long | Q96PQ1 | SIGLEC12 | NA | Inverse variance weighted | 9  | 0.017  | 0.084 | 8.429E-01 | 0.980 | pan | Severe COVID-19 |
| 13552_7   | SWP70                            | Switch-associated protein 70                                                | Q9UHG5 | SWAPF70  | NA | Inverse variance weighted | 8  | -0.007 | 0.033 | 8.429E-01 | 0.980 | pan | Severe COVID-19 |
| 9511_61   | NXP2                             | Neurexophilin-2                                                             | O95156 | NXP2     | NA | Inverse variance weighted | 3  | -0.074 | 0.375 | 8.429E-01 | 0.980 | pan | Severe COVID-19 |
| 17683_2   | COMD9                            | COMM domain-containing protein 9                                            | Q9P000 | COMM9    | NA | Wald ratio                | 1  | -0.030 | 0.151 | 8.432E-01 | 0.980 | pan | Severe COVID-19 |
| 3122_6    | SMAC                             | Diablo homolog, mitochondrial                                               | Q9NR28 | DIABLO   | NA | Wald ratio                | 1  | -0.061 | 0.310 | 8.436E-01 | 0.980 | pan | Severe COVID-19 |
| 15633_6   | RBP                              | Retinol-binding protein 4                                                   | P02753 | RBP4     | NA | Wald ratio                | 1  | 0.053  | 0.272 | 8.445E-01 | 0.980 | pan | Severe COVID-19 |
| 12348_46  | SYSM                             | Serine-tRNA ligase, mitochondrial                                           | Q9NP81 | SARS2    | NA | Wald ratio                | 1  | 0.041  | 0.210 | 8.451E-01 | 0.980 | pan | Severe COVID-19 |
| 2665_26   | BCMA                             | Tumor necrosis factor receptor superfamily member 17                        | Q02223 | TNFRSF17 | NA | Inverse variance weighted | 11 | -0.015 | 0.076 | 8.455E-01 | 0.980 | pan | Severe COVID-19 |
| 12332_7   | EF2K                             | Eukaryotic elongation factor 2 kinase                                       | O00418 | EF2K     | NA | Inverse variance weighted | 2  | 0.098  | 0.507 | 8.470E-01 | 0.980 | pan | Severe COVID-19 |
| 3419_49   | CAMK2D                           | Calcium/calmodulin-dependent protein kinase type II subunit delta           | Q13557 | CAMK2D   | NA | Wald ratio                | 1  | 0.064  | 0.334 | 8.484E-01 | 0.980 | pan | Severe COVID-19 |
| 17174_38  | AP1G2                            | AP-1 complex subunit gamma-like 2                                           | Q75843 | AP1G2    | NA | Inverse variance weighted | 3  | 0.016  | 0.085 | 8.486E-01 | 0.980 | pan | Severe COVID-19 |
| 17453_34  | Ceruloplasmin                    | Ceruloplasmin                                                               | P00450 | CP       | NA | Inverse variance weighted | 3  | 0.020  | 0.107 | 8.487E-01 | 0.980 | pan | Severe COVID-19 |
| 15542_19  | KCRU                             | Creatine kinase U-type, mitochondrial                                       | P12532 | CKMT1A   | NA | Inverse variance weighted | 9  | -0.017 | 0.091 | 8.487E-01 | 0.980 | pan | Severe COVID-19 |
| 5060_62   | B7-H1                            | Programmed cell death 1 ligand 1                                            | Q9N2Q7 | CD274    | NA | Inverse variance weighted | 2  | 0.012  | 0.065 | 8.493E-01 | 0.980 | pan | Severe COVID-19 |
| 18422_41  | ERG19                            | Diphosphomevalonate decarboxylase                                           | P53602 | MVD      | NA | Wald ratio                | 1  | 0.044  | 0.230 | 8.495E-01 | 0.980 | pan | Severe COVID-19 |
| 5036_50   | TSG-6                            | Tumor necrosis factor-inducible gene 6 protein                              | P98066 | TNFAIP6  | NA | Inverse variance weighted | 22 | -0.008 | 0.040 | 8.503E-01 | 0.980 | pan | Severe COVID-19 |
| 4912_17   | GOT1                             | Aspartate aminotransferase, cytoplasmic                                     | P17174 | GOT1     | NA | Wald ratio                | 1  | 0.074  | 0.394 | 8.504E-01 | 0.980 | pan | Severe COVID-19 |
| 19161_1   | UBP15                            | Ubiquitin carboxyl-terminal hydrolase 15                                    | Q9Y4E8 | USP15    | NA | Inverse variance weighted | 2  | -0.019 | 0.099 | 8.507E-01 | 0.980 | pan | Severe COVID-19 |
| 13392_13  | AT1B1                            | Sodium/potassium-transporting ATPase subunit beta-1                         | P05026 | ATP1B1   | NA | Inverse variance weighted | 5  | -0.014 | 0.074 | 8.514E-01 | 0.980 | pan | Severe COVID-19 |
| 3364_76   | Cathepsin V                      | Cathepsin L2                                                                | O60911 | CTSV     | NA | Inverse variance weighted | 12 | 0.012  | 0.064 | 8.517E-01 | 0.980 | pan | Severe COVID-19 |
| 15300_66  | CC134                            | Coiled-coil domain-containing protein 134                                   | Q9H6E4 | CCDC134  | NA | Wald ratio                | 1  | 0.026  | 0.139 | 8.519E-01 | 0.980 | pan | Severe COVID-19 |
| 11207_3   | Macrophage scavenger receptor:CD | Macrophage scavenger receptor types I and II: Cytoplasmic domain            | P21757 | MSR1     | NA | Wald ratio                | 1  | -0.121 | 0.650 | 8.525E-01 | 0.980 | pan | Severe COVID-19 |
| 8069_85   | CD3E                             | T-cell surface glycoprotein CD3 epsilon chain                               | P07766 | CD3E     | NA | Inverse variance weighted | 3  | -0.028 | 0.149 | 8.528E-01 | 0.980 | pan | Severe COVID-19 |
| 5728_60   | FCRL1                            | Fc receptor-like protein 1                                                  | Q96LA6 | FCRL1    | NA | Inverse variance weighted | 10 | 0.017  | 0.090 | 8.537E-01 | 0.980 | pan | Severe COVID-19 |
| 11266_8   | SELPL:ECOD                       | P-selectin glycoprotein ligand 1: Extracellular domain                      | Q14242 | SELPLG   | NA | Inverse variance weighted | 12 | 0.008  | 0.041 | 8.543E-01 | 0.980 | pan | Severe COVID-19 |
| 10852_114 | HNRDL                            | Heterogeneous nuclear ribonucleoprotein D-like                              | Q14979 | HNRNPDL  | NA | Wald ratio                | 1  | 0.051  | 0.278 | 8.546E-01 | 0.980 | pan | Severe COVID-19 |
| 13116_25  | CD177                            | CD177 antigen                                                               | Q8N6Q3 | CD177    | NA | Inverse variance weighted | 10 | -0.006 | 0.033 | 8.546E-01 | 0.980 | pan | Severe COVID-19 |
| 19392_6   | DDAH1                            | N(G),N(G)-dimethylarginine dimethylaminohydrolase 1                         | Q94760 | DDAH1    | NA | Inverse variance weighted | 12 | -0.010 | 0.053 | 8.547E-01 | 0.980 | pan | Severe COVID-19 |
| 2558_51   | b-endorphin                      | Beta-endorphin                                                              | P01189 | POMC     | NA | Wald ratio                | 1  | 0.055  | 0.302 | 8.547E-01 | 0.980 | pan | Severe COVID-19 |
| 10558_26  | PCDH9                            | Protocadherin-9                                                             | Q9HC56 | PCDH9    | NA | Inverse variance weighted | 8  | 0.010  | 0.054 | 8.550E-01 | 0.980 | pan | Severe COVID-19 |
| 12378_71  | TPSN                             | Tapasin                                                                     | O15533 | TAPBP    | NA | Inverse variance weighted | 7  | -0.011 | 0.058 | 8.551E-01 | 0.980 | pan | Severe COVID-19 |
| 18930_28  | SLIT2                            | Slit homolog 2 protein                                                      | Q94813 | SLIT2    | NA | Inverse variance weighted | 2  | -0.024 | 0.129 | 8.552E-01 | 0.980 | pan | Severe COVID-19 |
| 5034_79   | Trypsin 2                        | Trypsin-2                                                                   | P07478 | PRSS2    | NA | Inverse variance weighted | 13 | -0.013 | 0.074 | 8.559E-01 | 0.980 | pan | Severe COVID-19 |
| 5404_53   | DR6                              | Tumor necrosis factor receptor superfamily member 21                        | O75509 | TNFRSF21 | NA | Inverse variance weighted | 2  | -0.031 | 0.170 | 8.564E-01 | 0.980 | pan | Severe COVID-19 |
| 19357_11  | VAMP7                            | Vesicle-associated membrane protein 7                                       | P51809 | VAMP7    | NA | Wald ratio                | 1  | 0.052  | 0.286 | 8.565E-01 | 0.980 | pan | Severe COVID-19 |
| 2687_2    | MIA                              | Melanoma-derived growth regulatory protein                                  | Q16674 | MIA      | NA | Inverse variance weighted | 7  | -0.009 | 0.049 | 8.570E-01 | 0.980 | pan | Severe COVID-19 |
| 14711_27  | Cystatin M                       | Cystatin-M                                                                  | Q15828 | CST6     | NA | Inverse variance weighted | 7  | 0.017  | 0.092 | 8.570E-01 | 0.980 | pan | Severe COVID-19 |
| 18899_82  | HDGR3                            | Hepatitis-derived growth factor-related protein 3                           | Q9Y3E1 | HDGFL3   | NA | Inverse variance weighted | 3  | 0.056  | 0.314 | 8.572E-01 | 0.980 | pan | Severe COVID-19 |
| 17843_30  | PPCS                             | Phosphopantothenate--cysteine ligase                                        | Q9HA88 | PPCS     | NA | Inverse variance weighted | 2  | 0.027  | 0.152 | 8.573E-01 | 0.980 | pan | Severe COVID-19 |

|           |                             |                                                                                                      |         |          |    |                           |    |        |       |           |       |     |                 |
|-----------|-----------------------------|------------------------------------------------------------------------------------------------------|---------|----------|----|---------------------------|----|--------|-------|-----------|-------|-----|-----------------|
| 12709_63  | H1X                         | Histone H1x                                                                                          | Q92522  | H1-10    | NA | Wald ratio                | 1  | -0.078 | 0.434 | 8.575E-01 | 0.980 | pan | Severe COVID-19 |
| 11218_84  | TPMT                        | Thiopurine S-methyltransferase                                                                       | P51580  | TPMT     | NA | Wald ratio                | 1  | -0.116 | 0.650 | 8.583E-01 | 0.980 | pan | Severe COVID-19 |
| 15453_3   | a1-Microglobulin            | Alpha-1-microglobulin                                                                                | P02760  | AMBp     | NA | Wald ratio                | 1  | 0.046  | 0.259 | 8.589E-01 | 0.980 | pan | Severe COVID-19 |
| 8274_64   | Syntaxin-7                  | Syntaxin-7                                                                                           | Q15400  | STX7     | NA | Wald ratio                | 1  | -0.022 | 0.126 | 8.591E-01 | 0.980 | pan | Severe COVID-19 |
| 4867_15   | VEGF121                     | Vascular endothelial growth factor A, isoform 121                                                    | P15692  | VEGFA    | NA | Inverse variance weighted | 8  | -0.022 | 0.124 | 8.592E-01 | 0.980 | pan | Severe COVID-19 |
| 4535_50   | BST1                        | ADP-ribosyl cyclase/cyclic ADP-ribose hydrolase 2                                                    | Q10588  | BST1     | NA | Inverse variance weighted | 17 | -0.004 | 0.021 | 8.594E-01 | 0.980 | pan | Severe COVID-19 |
| 2705_5    | TECK                        | C-C motif chemokine 25                                                                               | Q15444  | CCL25    | NA | Inverse variance weighted | 11 | 0.009  | 0.051 | 8.595E-01 | 0.980 | pan | Severe COVID-19 |
| 19606_28  | ihh                         | Indian hedgehog protein                                                                              | Q14623  | IHH      | NA | Wald ratio                | 1  | 0.049  | 0.277 | 8.595E-01 | 0.980 | pan | Severe COVID-19 |
| 2952_75   | IGF-1                       | Insulin-like growth factor 1                                                                         | P05019  | IGF1     | NA | Inverse variance weighted | 2  | 0.102  | 0.577 | 8.599E-01 | 0.980 | pan | Severe COVID-19 |
| 5129_12   | SREC-1                      | Scavenger receptor class F member 1                                                                  | Q14162  | SCARF1   | NA | Inverse variance weighted | 5  | 0.010  | 0.058 | 8.602E-01 | 0.980 | pan | Severe COVID-19 |
| 3074_6    | LBP                         | Lipopolysaccharide-binding protein                                                                   | P18428  | LBP      | NA | Inverse variance weighted | 10 | 0.013  | 0.076 | 8.613E-01 | 0.981 | pan | Severe COVID-19 |
| 19206_20  | 8ODP                        | 7,8-dihydro-8-oxoguanine triphosphatase                                                              | P36639  | NUDT1    | NA | Wald ratio                | 1  | 0.025  | 0.143 | 8.613E-01 | 0.981 | pan | Severe COVID-19 |
| 5671_1    | Chymotrypsin                | Chymotrypsinogen B                                                                                   | P17538  | CTRB1    | NA | Inverse variance weighted | 8  | -0.013 | 0.074 | 8.620E-01 | 0.981 | pan | Severe COVID-19 |
| 2828_82   | HAI-1                       | Kunitz-type protease inhibitor 1                                                                     | Q43278  | SPINT1   | NA | Inverse variance weighted | 10 | -0.008 | 0.046 | 8.624E-01 | 0.981 | pan | Severe COVID-19 |
| 9329_28   | TRML1:ECD                   | Trem-like transcript 1 protein:Extracellular domain, Ig-like V-type domain                           | Q86YW5  | TREML1   | NA | Inverse variance weighted | 2  | -0.048 | 0.278 | 8.645E-01 | 0.983 | pan | Severe COVID-19 |
| 13622_16  | 2A5A                        | Serine/threonine-protein phosphatase 2A 56 kDa regulatory subunit alpha isoform                      | Q15172  | PPP2R5A  | NA | Wald ratio                | 1  | -0.061 | 0.359 | 8.659E-01 | 0.984 | pan | Severe COVID-19 |
| 11516_7   | FABPL                       | Fatty acid-binding protein, liver                                                                    | P07148  | FABP1    | NA | Wald ratio                | 1  | -0.023 | 0.135 | 8.669E-01 | 0.984 | pan | Severe COVID-19 |
| 10647_18  | ASCC1                       | Activating signal cointegrator 1 complex subunit 1                                                   | Q8N9N2  | ASCC1    | NA | Wald ratio                | 1  | -0.054 | 0.322 | 8.680E-01 | 0.984 | pan | Severe COVID-19 |
| 7266_4    | SPA9                        | Serpin A9                                                                                            | Q86WD7  | SERPINA9 | NA | Wald ratio                | 1  | 0.033  | 0.202 | 8.693E-01 | 0.984 | pan | Severe COVID-19 |
| 2474_54   | SAP                         | Serum amyloid P-component                                                                            | P02743  | APCS     | NA | Inverse variance weighted | 7  | -0.011 | 0.067 | 8.702E-01 | 0.984 | pan | Severe COVID-19 |
| 18231_147 | PRND                        | Prion-like protein doppel                                                                            | Q9UKY0  | PRND     | NA | Wald ratio                | 1  | 0.047  | 0.290 | 8.703E-01 | 0.984 | pan | Severe COVID-19 |
| 12411_60  | MAX                         | Protein max                                                                                          | P61244  | MAX      | NA | Wald ratio                | 1  | -0.014 | 0.085 | 8.707E-01 | 0.984 | pan | Severe COVID-19 |
| 15322_35  | CRADD                       | Death domain-containing protein CRADD                                                                | P78560  | CRADD    | NA | Inverse variance weighted | 3  | 0.060  | 0.368 | 8.713E-01 | 0.984 | pan | Severe COVID-19 |
| 9337_43   | TKN1                        | Protachykinin-1                                                                                      | P20366  | TAC1     | NA | Inverse variance weighted | 6  | 0.012  | 0.076 | 8.720E-01 | 0.984 | pan | Severe COVID-19 |
| 3212_30   | ASAH2                       | Neutral ceramidase                                                                                   | Q9NR71  | ASAH2    | NA | Inverse variance weighted | 10 | -0.008 | 0.052 | 8.722E-01 | 0.984 | pan | Severe COVID-19 |
| 15483_377 | Agrin                       | Agrin                                                                                                | Q00468  | AGRN     | NA | Inverse variance weighted | 12 | -0.010 | 0.062 | 8.727E-01 | 0.984 | pan | Severe COVID-19 |
| 8034_6    | DRGX                        | Dorsal root ganglia homeobox protein                                                                 | A6NNAS  | DRGX     | NA | Inverse variance weighted | 7  | 0.008  | 0.048 | 8.734E-01 | 0.984 | pan | Severe COVID-19 |
| 11102_22  | REG4                        | Regenerating islet-derived protein 4                                                                 | Q9BY28  | REG4     | NA | Inverse variance weighted | 2  | 0.047  | 0.298 | 8.747E-01 | 0.984 | pan | Severe COVID-19 |
| 13095_51  | PSP                         | Lithostathine-1-alpha                                                                                | P05451  | REG1A    | NA | Inverse variance weighted | 7  | -0.019 | 0.119 | 8.749E-01 | 0.984 | pan | Severe COVID-19 |
| 4562_1    | NXPH1                       | Neurexophilin-1                                                                                      | P58417  | NXPH1    | NA | Wald ratio                | 1  | -0.074 | 0.472 | 8.753E-01 | 0.984 | pan | Severe COVID-19 |
| 12855_16  | CTO32                       | Cas scaffolding protein family member 4                                                              | Q9NQ75  | CASS4    | NA | Wald ratio                | 1  | 0.045  | 0.285 | 8.757E-01 | 0.984 | pan | Severe COVID-19 |
| 6649_51   | NET1                        | Netrin-1                                                                                             | Q95631  | NTN1     | NA | Inverse variance weighted | 7  | 0.010  | 0.065 | 8.759E-01 | 0.984 | pan | Severe COVID-19 |
| 4332_6    | CLC1B                       | C-type lectin domain family 1 member B                                                               | Q9P126  | CLEC1B   | NA | Wald ratio                | 1  | -0.033 | 0.211 | 8.763E-01 | 0.984 | pan | Severe COVID-19 |
| 13565_2   | p130                        | Retinoblastoma-like protein 2                                                                        | Q08999  | RBL2     | NA | Inverse variance weighted | 6  | 0.016  | 0.100 | 8.764E-01 | 0.984 | pan | Severe COVID-19 |
| 9251_28   | MA2B2                       | Epididymis-specific alpha-mannosidase                                                                | Q9Y2E5  | MAN2B2   | NA | Inverse variance weighted | 10 | -0.005 | 0.033 | 8.766E-01 | 0.984 | pan | Severe COVID-19 |
| 3220_40   | RET                         | Proto-oncogene tyrosine-protein kinase receptor Ret                                                  | P07949  | RET      | NA | Inverse variance weighted | 5  | 0.008  | 0.054 | 8.771E-01 | 0.984 | pan | Severe COVID-19 |
| 4220_39   | FER                         | Tyrosine-protein kinase Fer                                                                          | P16591  | FER      | NA | Inverse variance weighted | 2  | -0.026 | 0.166 | 8.772E-01 | 0.984 | pan | Severe COVID-19 |
| 15376_134 | CATE                        | Cathepsin E                                                                                          | P14091  | CTSE     | NA | Inverse variance weighted | 5  | 0.008  | 0.053 | 8.773E-01 | 0.984 | pan | Severe COVID-19 |
| 13534_20  | MYOM2                       | Myomesin-2                                                                                           | P54296  | MYOM2    | NA | Inverse variance weighted | 3  | 0.033  | 0.212 | 8.774E-01 | 0.984 | pan | Severe COVID-19 |
| 3799_11   | Carbonic anhydrase III      | Carbonic anhydrase 3                                                                                 | P07451  | CA3      | NA | Inverse variance weighted | 5  | -0.013 | 0.085 | 8.778E-01 | 0.984 | pan | Severe COVID-19 |
| 19558_10  | LRP4                        | Low-density lipoprotein receptor-related protein 4                                                   | O75096  | LRP4     | NA | Inverse variance weighted | 10 | -0.008 | 0.053 | 8.781E-01 | 0.984 | pan | Severe COVID-19 |
| 3007_7    | Siglec-9                    | Sialic acid-binding Ig-like lectin 9                                                                 | Q9Y336  | SIGLEC9  | NA | Inverse variance weighted | 7  | 0.009  | 0.060 | 8.787E-01 | 0.984 | pan | Severe COVID-19 |
| 6439_59   | CN093                       | Uncharacterized protein C14orf93                                                                     | Q9H972  | C14orf93 | NA | Wald ratio                | 1  | -0.047 | 0.312 | 8.801E-01 | 0.984 | pan | Severe COVID-19 |
| 7085_81   | CDSN                        | Corneodesmosin                                                                                       | Q15517  | CDSN     | NA | Inverse variance weighted | 7  | 0.017  | 0.112 | 8.805E-01 | 0.984 | pan | Severe COVID-19 |
| 18313_4   | Asparaginase-like protein 1 | Isoaspartyl peptidase/L-asparaginase                                                                 | Q7L266  | ASRG1L   | NA | Inverse variance weighted | 4  | 0.009  | 0.063 | 8.809E-01 | 0.984 | pan | Severe COVID-19 |
| 3435_53   | FN1.4                       | Fibronectin Fragment 4                                                                               | P02751  | FN1      | NA | Inverse variance weighted | 2  | 0.057  | 0.387 | 8.825E-01 | 0.984 | pan | Severe COVID-19 |
| 8397_147  | QSOX2                       | Sulphydryl oxidase 2                                                                                 | Q6ZR97  | QSOX2    | NA | Inverse variance weighted | 16 | 0.005  | 0.033 | 8.832E-01 | 0.984 | pan | Severe COVID-19 |
| 2879_9    | a1-Antichymotrypsin         | Alpha-1-antichymotrypsin                                                                             | P01011  | SERPINA3 | NA | Wald ratio                | 1  | 0.049  | 0.333 | 8.841E-01 | 0.984 | pan | Severe COVID-19 |
| 6385_63   | VWA1                        | von Willebrand factor A domain-containing protein 1                                                  | Q6PCB0  | VWA1     | NA | Inverse variance weighted | 7  | 0.007  | 0.048 | 8.852E-01 | 0.984 | pan | Severe COVID-19 |
| 4471_50   | TGM3                        | Protein-glutamine gamma-glutamyltransferase E                                                        | Q08188  | TGM3     | NA | Inverse variance weighted | 5  | -0.006 | 0.039 | 8.866E-01 | 0.984 | pan | Severe COVID-19 |
| 19154_41  | Protease nexin I            | Glia-derived nexin                                                                                   | P07093  | SERPINE2 | NA | Inverse variance weighted | 13 | -0.006 | 0.041 | 8.874E-01 | 0.984 | pan | Severe COVID-19 |
| 7827_20   | ADA32                       | Disintegrin and metalloproteinase domain-containing protein 32                                       | Q8TC27  | ADAM32   | NA | Wald ratio                | 1  | 0.051  | 0.364 | 8.881E-01 | 0.984 | pan | Severe COVID-19 |
| 16614_27  | RSP01                       | R-spondin-1                                                                                          | Q2MKA7  | RSP01    | NA | Inverse variance weighted | 3  | 0.010  | 0.074 | 8.886E-01 | 0.984 | pan | Severe COVID-19 |
| 4297_62   | Spondin-1                   | Spondin-1                                                                                            | Q9HC86  | SPON1    | NA | Inverse variance weighted | 4  | -0.007 | 0.053 | 8.888E-01 | 0.984 | pan | Severe COVID-19 |
| 3831_21   | pTEN                        | Phosphatidylinositol 3,4,5-trisphosphate 3-phosphatase and dual-specificity protein phosphatase PTEN | P60484  | PTEN     | NA | Wald ratio                | 1  | -0.051 | 0.367 | 8.889E-01 | 0.984 | pan | Severe COVID-19 |
| 8697_38   | Glypican 1                  | Glypican-1                                                                                           | P35052  | GPC1     | NA | Inverse variance weighted | 14 | -0.005 | 0.034 | 8.895E-01 | 0.984 | pan | Severe COVID-19 |
| 6920_1    | GFRAL                       | GDNF family receptor alpha-like                                                                      | P6JUXV0 | GFRAL    | NA | Inverse variance weighted | 6  | 0.010  | 0.069 | 8.900E-01 | 0.984 | pan | Severe COVID-19 |
| 10490_3   | RPN1:CD                     | Dolichyl-diphosphooligosaccharide--protein glycosyltransferase subunit 1:Cytoplasmic domain          | P04843  | RPN1     | NA | Wald ratio                | 1  | 0.015  | 0.113 | 8.917E-01 | 0.984 | pan | Severe COVID-19 |
| 2890_59   | CCL28                       | C-C motif chemokine 28                                                                               | Q9NRJ3  | CCL28    | NA | Inverse variance weighted | 8  | 0.013  | 0.093 | 8.920E-01 | 0.984 | pan | Severe COVID-19 |
| 9383_24   | CH3L2                       | Chitinase-3-like protein 2                                                                           | Q15782  | CH3L2    | NA | Wald ratio                | 1  | 0.034  | 0.254 | 8.924E-01 | 0.984 | pan | Severe COVID-19 |
| 16770_3   | REG1B                       | Lithostathine-1-beta                                                                                 | P48304  | REG1B    | NA | Inverse variance weighted | 4  | -0.025 | 0.183 | 8.928E-01 | 0.984 | pan | Severe COVID-19 |
| 4133_54   | Granzyme B                  | Granzyme B                                                                                           | P10144  | GZMB     | NA | Wald ratio                | 1  | -0.022 | 0.162 | 8.931E-01 | 0.984 | pan | Severe COVID-19 |
| 3040_59   | MIP-1a                      | C-C motif chemokine 3                                                                                | P10147  | CCL3     | NA | Wald ratio                | 1  | -0.041 | 0.304 | 8.931E-01 | 0.984 | pan | Severe COVID-19 |
| 7144_234  | KAZO1                       | Kazal-type serine protease inhibitor domain-containing protein 1                                     | Q9G182  | KAZALD1  | NA | Wald ratio                | 1  | 0.036  | 0.267 | 8.939E-01 | 0.984 | pan | Severe COVID-19 |
| 15481_45  | LL-37                       | Antibacterial protein LL-37                                                                          | P49913  | CAMP     | NA | Inverse variance weighted | 10 | 0.012  | 0.093 | 8.946E-01 | 0.984 | pan | Severe COVID-19 |
| 5134_52   | TIMD3                       | Hepatitis A virus cellular receptor 2                                                                | Q8TDQ0  | HAVCR2   | NA | Inverse variance weighted | 9  | 0.006  | 0.047 | 8.947E-01 | 0.984 | pan | Severe COVID-19 |
| 8969_49   | CD14                        | Monocyte differentiation antigen CD14                                                                | P08571  | CD14     | NA | Wald ratio                | 1  | 0.062  | 0.469 | 8.954E-01 | 0.984 | pan | Severe COVID-19 |
| 13388_57  | NEC1                        | Neuroendocrine convertase 1                                                                          | P29120  | PCSK1    | NA | Inverse variance weighted | 11 | -0.007 | 0.051 | 8.957E-01 | 0.984 | pan | Severe COVID-19 |
| 3033_57   | Galectin-2                  | Galectin-2                                                                                           | P05162  | LGALS2   | NA | Inverse variance weighted | 3  | 0.011  | 0.087 | 8.961E-01 | 0.984 | pan | Severe COVID-19 |
| 8469_41   | IGFBP-2                     | Insulin-like growth factor-binding protein 2                                                         | P18065  | IGFBP2   | NA | Inverse variance weighted | 4  | 0.021  | 0.161 | 8.964E-01 | 0.984 | pan | Severe COVID-19 |
| 10462_14  | INSL5                       | Insulin-like peptide INSL5                                                                           | Q9YSQ6  | INSL5    | NA | Wald ratio                | 1  | -0.034 | 0.263 | 8.969E-01 | 0.984 | pan | Severe COVID-19 |
| 5131_15   | TAI                         | Tumor necrosis factor receptor superfamily member 19                                                 | Q9NS68  | TNFRSF19 | NA | Wald ratio                | 1  | -0.020 | 0.155 | 8.972E-01 | 0.984 | pan | Severe COVID-19 |
| 11441_11  | PYGL                        | Glycogen phosphorylase, liver form                                                                   | P06737  | PYGL     | NA | Inverse variance weighted | 7  | 0.012  | 0.095 | 8.981E-01 | 0.984 | pan | Severe COVID-19 |
| 6247_9    | SIRB1                       | Signal-regulatory protein beta-1                                                                     | Q00241  | SIRPB1   | NA | Inverse variance weighted | 9  | -0.003 | 0.020 | 8.982E-01 | 0.984 | pan | Severe COVID-19 |
| 10781_19  | CLC4G                       | C-type lectin domain family 4 member G                                                               | Q6UXB4  | CLEC4G   | NA | Wald ratio                | 1  | -0.047 | 0.371 | 8.982E-01 | 0.984 | pan | Severe COVID-19 |
| 10366_11  | PDGFRA                      | Platelet-derived growth factor receptor alpha                                                        | P16234  | PDGFRA   | NA | Inverse variance weighted | 10 | 0.009  | 0.072 | 8.985E-01 | 0.984 | pan | Severe COVID-19 |
| 6086_15   | CRDL2                       | Chordin-like protein 2                                                                               | Q6WN34  | CHRD12   | NA | Inverse variance weighted | 6  | -0.015 | 0.114 | 8.985E-01 | 0.984 | pan | Severe COVID-19 |
| 10584_7   | NDUS4                       | NADH dehydrogenase [ubiquinone] iron-sulfur protein 4, mitochondrial                                 | Q43181  | NDUF54   | NA | Inverse variance weighted | 20 | -0.010 | 0.076 | 8.988E-01 | 0.984 | pan | Severe COVID-19 |

|           |                                 |                                                                   |         |          |    |                           |    |        |       |           |       |     |                 |
|-----------|---------------------------------|-------------------------------------------------------------------|---------|----------|----|---------------------------|----|--------|-------|-----------|-------|-----|-----------------|
| 13634_209 | PIR                             | Pirin                                                             | O00625  | PIR      | NA | Wald ratio                | 1  | -0.038 | 0.297 | 8.993E-01 | 0.984 | pan | Severe COVID-19 |
| 4834_61   | Epithelial cell kinase          | Ephrin type-A receptor 2                                          | P29317  | EPHA2    | NA | Inverse variance weighted | 5  | 0.010  | 0.081 | 8.996E-01 | 0.984 | pan | Severe COVID-19 |
| 12697_30  | PI42A                           | Phosphatidylinositol 5-phosphate 4-kinase type-2 alpha            | P48426  | PIP4K2A  | NA | Wald ratio                | 1  | 0.039  | 0.311 | 8.999E-01 | 0.984 | pan | Severe COVID-19 |
| 15487_164 | carboxylesterase, liver         | Liver carboxylesterase 1                                          | P23141  | CES1     | NA | Wald ratio                | 1  | 0.039  | 0.311 | 8.999E-01 | 0.984 | pan | Severe COVID-19 |
| 9449_150  | C4b-binding protein alpha chain | C4b-binding protein alpha chain                                   | P04003  | C4BPA    | NA | Inverse variance weighted | 5  | -0.018 | 0.144 | 9.004E-01 | 0.984 | pan | Severe COVID-19 |
| 3210_1    | METAP1                          | Methionine aminopeptidase 1                                       | P53582  | METAP1   | NA | Wald ratio                | 1  | -0.050 | 0.402 | 9.005E-01 | 0.984 | pan | Severe COVID-19 |
| 5346_24   | CPNE1:C2, 1 and 2               | Copine-1:Ca2+-dependent membrane-targeting module domains 1 and 2 | Q99829  | CPNE1    | NA | Inverse variance weighted | 12 | -0.006 | 0.051 | 9.008E-01 | 0.984 | pan | Severe COVID-19 |
| 17794_6   | Phosphomannomutase 2            | Phosphomannomutase 2                                              | O15305  | PMNM2    | NA | Inverse variance weighted | 5  | 0.013  | 0.108 | 9.012E-01 | 0.984 | pan | Severe COVID-19 |
| 13553_4   | DCNL3                           | DCN1-like protein 3                                               | Q8BIWE4 | DCUNID3  | NA | Wald ratio                | 1  | -0.043 | 0.351 | 9.014E-01 | 0.984 | pan | Severe COVID-19 |
| 7866_11   | DJC30                           | DnaJ homolog subfamily C member 30                                | Q96LL9  | DNAJC30  | NA | Inverse variance weighted | 2  | -0.012 | 0.097 | 9.016E-01 | 0.984 | pan | Severe COVID-19 |
| 6584_1    | SRCH                            | Sarcoplasmic reticulum histidine-rich calcium-binding protein     | P23327  | HRC      | NA | Wald ratio                | 1  | -0.038 | 0.306 | 9.016E-01 | 0.984 | pan | Severe COVID-19 |
| 15539_15  | SLIK1                           | SLIT and NTRK-like protein 1                                      | Q96PX8  | SLITRK1  | NA | Wald ratio                | 1  | -0.028 | 0.225 | 9.018E-01 | 0.984 | pan | Severe COVID-19 |
| 11573_3   | SRSF6                           | Serine/arginine-rich splicing factor 6                            | Q13247  | SRSF6    | NA | Wald ratio                | 1  | -0.036 | 0.289 | 9.019E-01 | 0.984 | pan | Severe COVID-19 |
| 17836_17  | S100A16                         | Protein S100-A16                                                  | Q96FQ6  | S100A16  | NA | Wald ratio                | 1  | -0.030 | 0.244 | 9.023E-01 | 0.984 | pan | Severe COVID-19 |
| 16594_44  | FAIM1                           | Fas apoptotic inhibitory molecule 1                               | Q9NVQ4  | FAIM     | NA | Inverse variance weighted | 10 | -0.005 | 0.045 | 9.027E-01 | 0.984 | pan | Severe COVID-19 |
| 13744_37  | IL-3 Ra                         | Interleukin-3 receptor subunit alpha                              | P26951  | IL3RA    | NA | Inverse variance weighted | 3  | 0.021  | 0.168 | 9.027E-01 | 0.984 | pan | Severe COVID-19 |
| 17761_2   | NUDT5                           | ADP-sugar pyrophosphatase                                         | Q9UKK9  | NUDT5    | NA | Inverse variance weighted | 2  | -0.023 | 0.190 | 9.030E-01 | 0.984 | pan | Severe COVID-19 |
| 17765_3   | SPN1                            | Snurportin-1                                                      | O95149  | SNUPN    | NA | Wald ratio                | 1  | 0.014  | 0.113 | 9.031E-01 | 0.984 | pan | Severe COVID-19 |
| 15521_4   | Alcadein alpha-1                | Calsyntenin-1                                                     | O94985  | CLSTN1   | NA | Inverse variance weighted | 7  | -0.003 | 0.022 | 9.039E-01 | 0.985 | pan | Severe COVID-19 |
| 5980_55   | BOLA3                           | BoLA-like protein 3                                               | Q53533  | BOLA3    | NA | Wald ratio                | 1  | 0.015  | 0.126 | 9.058E-01 | 0.985 | pan | Severe COVID-19 |
| 17819_30  | FAHD1                           | Acylpyruvase FAHD1, mitochondrial                                 | Q6P587  | FAHD1    | NA | Inverse variance weighted | 4  | -0.016 | 0.136 | 9.062E-01 | 0.985 | pan | Severe COVID-19 |
| 11257_1   | DHPR                            | Dihydropteridine reductase                                        | P09417  | QDPR     | NA | Inverse variance weighted | 6  | -0.005 | 0.043 | 9.062E-01 | 0.985 | pan | Severe COVID-19 |
| 15644_1   | Biotinidase                     | Biotinidase                                                       | P43251  | BDT      | NA | Inverse variance weighted | 9  | 0.004  | 0.032 | 9.066E-01 | 0.985 | pan | Severe COVID-19 |
| 17764_108 | RHOC                            | Rho-related GTP-binding protein RhoC                              | P08134  | RHOC     | NA | Inverse variance weighted | 2  | -0.015 | 0.131 | 9.072E-01 | 0.985 | pan | Severe COVID-19 |
| 4775_34   | Gelsolin                        | Gelsolin                                                          | P06396  | GSN      | NA | Inverse variance weighted | 3  | 0.013  | 0.115 | 9.076E-01 | 0.985 | pan | Severe COVID-19 |
| 9470_15   | MET24                           | Methyltransferase-like protein 24                                 | Q5JXM2  | METT124  | NA | Inverse variance weighted | 5  | 0.012  | 0.107 | 9.081E-01 | 0.985 | pan | Severe COVID-19 |
| 17675_17  | AC013                           | Acyl-coenzyme A thioesterase 13                                   | Q9NP13  | ACOT13   | NA | Wald ratio                | 1  | -0.034 | 0.298 | 9.081E-01 | 0.985 | pan | Severe COVID-19 |
| 7096_30   | RM01                            | Regulator of microtubule dynamics protein 1                       | Q960B5  | RMDN1    | NA | Inverse variance weighted | 5  | -0.009 | 0.078 | 9.081E-01 | 0.985 | pan | Severe COVID-19 |
| 5139_32   | UNC5H3                          | Netrin receptor UNC5C                                             | O95185  | UNC5C    | NA | Inverse variance weighted | 3  | 0.022  | 0.188 | 9.087E-01 | 0.985 | pan | Severe COVID-19 |
| 5687_5    | GLU2B                           | Glycosidase 2 subunit beta                                        | P14314  | PRKCSH   | NA | Inverse variance weighted | 3  | -0.020 | 0.173 | 9.092E-01 | 0.985 | pan | Severe COVID-19 |
| 16593_3   | FADD                            | FAS-associated death domain protein                               | Q13158  | FADD     | NA | Inverse variance weighted | 2  | -0.034 | 0.295 | 9.094E-01 | 0.985 | pan | Severe COVID-19 |
| 4276_10   | prostatic binding protein       | Phosphatidylethanolamine-binding protein 1                        | P30086  | PEBP1    | NA | Inverse variance weighted | 10 | -0.005 | 0.042 | 9.103E-01 | 0.985 | pan | Severe COVID-19 |
| 8465_52   | Cathepsin H                     | Cathepsin H                                                       | P09668  | CTSH     | NA | Inverse variance weighted | 17 | -0.003 | 0.029 | 9.108E-01 | 0.985 | pan | Severe COVID-19 |
| 13476_16  | KIN17                           | DNA/RNA-binding protein KIN17                                     | O60870  | KIN      | NA | Wald ratio                | 1  | 0.032  | 0.291 | 9.136E-01 | 0.985 | pan | Severe COVID-19 |
| 5708_1    | LEAP2                           | Liver-expressed antimicrobial peptide 2                           | Q969E1  | LEAP2    | NA | Inverse variance weighted | 5  | -0.006 | 0.054 | 9.137E-01 | 0.985 | pan | Severe COVID-19 |
| 9267_2    | CBPA4                           | Carboxypeptidase A4                                               | Q9UI42  | CPA4     | NA | Inverse variance weighted | 21 | -0.002 | 0.017 | 9.144E-01 | 0.985 | pan | Severe COVID-19 |
| 18222_34  | SHLB2                           | Endophilin-B2                                                     | Q9NR46  | SH3GLB2  | NA | Inverse variance weighted | 3  | -0.006 | 0.054 | 9.146E-01 | 0.985 | pan | Severe COVID-19 |
| 13536_56  | POLI                            | DNA polymerase iota                                               | Q9UNA4  | POLI     | NA | Wald ratio                | 1  | 0.021  | 0.198 | 9.152E-01 | 0.985 | pan | Severe COVID-19 |
| 10832_24  | B4GT6                           | Beta-1,4-galactosyltransferase 6                                  | Q9UBX8  | B4GALT6  | NA | Inverse variance weighted | 12 | -0.003 | 0.032 | 9.153E-01 | 0.985 | pan | Severe COVID-19 |
| 14684_17  | CAN2                            | Calpain-2 catalytic subunit                                       | P17655  | CAPN2    | NA | Inverse variance weighted | 2  | 0.024  | 0.229 | 9.161E-01 | 0.985 | pan | Severe COVID-19 |
| 16872_248 | MAA1                            | Maleylacetoacetate isomerase                                      | O43708  | GSTJ2    | NA | Inverse variance weighted | 12 | -0.003 | 0.025 | 9.163E-01 | 0.985 | pan | Severe COVID-19 |
| 9719_145  | MMP-16                          | Matrix metalloproteinase-16                                       | P51512  | MMP16    | NA | Inverse variance weighted | 2  | 0.048  | 0.462 | 9.173E-01 | 0.985 | pan | Severe COVID-19 |
| 4548_4    | Fucosyltransferase 3            | Galactoside 3(4)-L-fucosyltransferase                             | P21217  | FUT3     | NA | Inverse variance weighted | 7  | 0.008  | 0.082 | 9.183E-01 | 0.985 | pan | Severe COVID-19 |
| 19158_1   | PAF                             | PCNA-associated factor                                            | Q15004  | PCLAF    | NA | Inverse variance weighted | 5  | 0.014  | 0.134 | 9.189E-01 | 0.985 | pan | Severe COVID-19 |
| 15387_44  | Neuropilin-2                    | Neuropilin-2                                                      | O60462  | NRP2     | NA | Inverse variance weighted | 6  | -0.011 | 0.112 | 9.199E-01 | 0.985 | pan | Severe COVID-19 |
| 14150_7   | IL-1F6                          | Interleukin-36 alpha                                              | Q9UHA7  | IL36A    | NA | Inverse variance weighted | 2  | -0.017 | 0.167 | 9.208E-01 | 0.985 | pan | Severe COVID-19 |
| 18432_32  | RALB                            | Ras-related protein Ral-B                                         | P11234  | RALB     | NA | Wald ratio                | 1  | -0.025 | 0.255 | 9.210E-01 | 0.985 | pan | Severe COVID-19 |
| 13934_3   | MCFL2                           | Guanine nucleotide exchange factor DBS                            | O15068  | MCFL2    | NA | Inverse variance weighted | 2  | 0.007  | 0.069 | 9.211E-01 | 0.985 | pan | Severe COVID-19 |
| 2985_35   | Gro-a                           | Growth-regulated alpha protein                                    | P09341  | CXCL1    | NA | Inverse variance weighted | 13 | -0.004 | 0.044 | 9.213E-01 | 0.985 | pan | Severe COVID-19 |
| 8971_9    | NRX1A                           | Neurexin-1                                                        | Q9ULB1  | NRXN1    | NA | Inverse variance weighted | 6  | 0.014  | 0.138 | 9.213E-01 | 0.985 | pan | Severe COVID-19 |
| 12847_27  | MCE1                            | mRNA-capping enzyme                                               | O60942  | RNGTT    | NA | Wald ratio                | 1  | -0.051 | 0.519 | 9.219E-01 | 0.985 | pan | Severe COVID-19 |
| 5076_53   | EPHAA                           | Ephrin type-A receptor 10                                         | Q5JZY3  | EPHA10   | NA | Wald ratio                | 1  | 0.020  | 0.209 | 9.226E-01 | 0.985 | pan | Severe COVID-19 |
| 2816_50   | BCAM                            | Basal Cell Adhesion Molecule                                      | P50895  | BCAM     | NA | Inverse variance weighted | 4  | 0.012  | 0.122 | 9.228E-01 | 0.985 | pan | Severe COVID-19 |
| 9478_69   | KPRA                            | Phosphoribosyl pyrophosphate synthase-associated protein 1        | Q14558  | PRPSA1   | NA | Wald ratio                | 1  | -0.027 | 0.278 | 9.234E-01 | 0.985 | pan | Severe COVID-19 |
| 18215_5   | THG1                            | Probable tRNA(His) guanylyltransferase                            | Q9NWX6  | THG1L    | NA | Inverse variance weighted | 8  | -0.004 | 0.039 | 9.243E-01 | 0.985 | pan | Severe COVID-19 |
| 8973_23   | FCRL4:ECD                       | Fc receptor-like protein 4:Extracellular domain                   | Q96PJ5  | FCRL4    | NA | Inverse variance weighted | 19 | -0.004 | 0.042 | 9.246E-01 | 0.985 | pan | Severe COVID-19 |
| 11215_6   | CAD15:CD                        | Cadherin-15: Cytoplasmic domain                                   | P55291  | CDH15    | NA | Inverse variance weighted | 2  | 0.021  | 0.223 | 9.246E-01 | 0.985 | pan | Severe COVID-19 |
| 18162_167 | IRAK4                           | Interleukin-1 receptor-associated kinase 4                        | Q9NWX3  | IRAK4    | NA | Wald ratio                | 1  | -0.018 | 0.190 | 9.249E-01 | 0.985 | pan | Severe COVID-19 |
| 10907_116 | NTRI                            | Neurotrimin                                                       | Q9P121  | NTM      | NA | Inverse variance weighted | 3  | -0.018 | 0.189 | 9.254E-01 | 0.985 | pan | Severe COVID-19 |
| 9842_2    | b-Catenin                       | Catenin beta-1                                                    | P35222  | CTNNB1   | NA | Inverse variance weighted | 10 | -0.003 | 0.037 | 9.254E-01 | 0.985 | pan | Severe COVID-19 |
| 9061_3    | ARHGA                           | Rho guanine nucleotide exchange factor 10                         | O15013  | ARHGEF10 | NA | Wald ratio                | 1  | -0.020 | 0.210 | 9.255E-01 | 0.985 | pan | Severe COVID-19 |
| 3617_80   | HGFA                            | Hepatocyte growth factor activator                                | Q04756  | HGFAC    | NA | Inverse variance weighted | 14 | -0.003 | 0.037 | 9.264E-01 | 0.985 | pan | Severe COVID-19 |
| 19241_31  | RBP-II                          | Retinol-binding protein 5                                         | P82980  | RBP5     | NA | Wald ratio                | 1  | -0.028 | 0.303 | 9.264E-01 | 0.985 | pan | Severe COVID-19 |
| 13544_9   | HMH1A                           | Rho GTPase-activating protein 45                                  | Q92619  | ARHGA45  | NA | Wald ratio                | 1  | 0.015  | 0.160 | 9.271E-01 | 0.985 | pan | Severe COVID-19 |
| 14708_59  | C08G                            | Complement component C8 gamma chain                               | P07360  | C8G      | NA | Inverse variance weighted | 10 | -0.008 | 0.094 | 9.279E-01 | 0.985 | pan | Severe COVID-19 |
| 15414_316 | LDHA                            | L-lactate dehydrogenase A chain                                   | P00338  | LDHA     | NA | Wald ratio                | 1  | 0.024  | 0.271 | 9.282E-01 | 0.985 | pan | Severe COVID-19 |
| 9313_27   | CBLN1                           | Cerebellin-1                                                      | P23435  | CBLN1    | NA | Inverse variance weighted | 30 | -0.003 | 0.035 | 9.293E-01 | 0.985 | pan | Severe COVID-19 |
| 3322_52   | LRIG3                           | Leucine-rich repeats and immunoglobulin-like domains protein 3    | Q6UXM1  | LRIG3    | NA | Inverse variance weighted | 9  | -0.004 | 0.041 | 9.300E-01 | 0.985 | pan | Severe COVID-19 |
| 12646_2   | RPE                             | Ribulose-phosphate 3-epimerase                                    | Q96A79  | RPE      | NA | Wald ratio                | 1  | -0.016 | 0.185 | 9.301E-01 | 0.985 | pan | Severe COVID-19 |
| 8080_24   | PSMP                            | Prostate-associated microseminoprotein                            | Q116U9  | MSMP     | NA | Inverse variance weighted | 15 | -0.006 | 0.066 | 9.304E-01 | 0.985 | pan | Severe COVID-19 |
| 9241_40   | SIRPG                           | Signal-regulatory protein gamma                                   | Q9P1W8  | SIRPG    | NA | Wald ratio                | 1  | -0.021 | 0.241 | 9.305E-01 | 0.985 | pan | Severe COVID-19 |
| 16609_106 | KIRR2                           | Kin of IRRE-like protein 2                                        | Q6UWL6  | KIRREL2  | NA | Inverse variance weighted | 9  | -0.004 | 0.040 | 9.311E-01 | 0.985 | pan | Severe COVID-19 |
| 2278_61   | TIMP-2                          | Metalloproteinase inhibitor 2                                     | P16035  | TIMP2    | NA | Wald ratio                | 1  | 0.019  | 0.214 | 9.311E-01 | 0.985 | pan | Severe COVID-19 |
| 14254_27  | PTN4                            | Tyrosine-protein phosphatase non-receptor type 4                  | P29074  | PTPN4    | NA | Inverse variance weighted | 4  | 0.015  | 0.172 | 9.312E-01 | 0.985 | pan | Severe COVID-19 |
| 10612_18  | PLOD3                           | Procollagen-lysine,2-oxoglutarate 5-dioxygenase 3                 | O60568  | PLOD3    | NA | Inverse variance weighted | 7  | 0.009  | 0.106 | 9.312E-01 | 0.985 | pan | Severe COVID-19 |
| 12357_41  | SNP29                           | Synaptosomal-associated protein 29                                | O95721  | SNAP29   | NA | Wald ratio                | 1  | 0.028  | 0.322 | 9.314E-01 | 0.985 | pan | Severe COVID-19 |
| 10521_10  | MXRA8:ECD                       | Matrix-remodeling-associated protein 8: Extracellular domain      | Q9BRK3  | MXRA8    | NA | Inverse variance weighted | 3  | 0.011  | 0.129 | 9.318E-01 | 0.985 | pan | Severe COVID-19 |
| 3326_58   | Nectin-like protein 2           | Cell adhesion molecule 1                                          | Q9BY67  | CADM1    | NA | Wald ratio                | 1  | -0.009 | 0.110 | 9.320E-01 | 0.985 | pan | Severe COVID-19 |

|           |                             |                                                                                                         |        |          |    |                           |    |        |       |           |       |     |                 |
|-----------|-----------------------------|---------------------------------------------------------------------------------------------------------|--------|----------|----|---------------------------|----|--------|-------|-----------|-------|-----|-----------------|
| 3340_53   | TSP4                        | Thrombospondin-4                                                                                        | P35443 | THBS4    | NA | Inverse variance weighted | 4  | -0.008 | 0.099 | 9.322E-01 | 0.985 | pan | Severe COVID-19 |
| 2771_35   | IGFBP-1                     | Insulin-like growth factor-binding protein 1                                                            | P08833 | IGFBP1   | NA | Inverse variance weighted | 2  | 0.014  | 0.171 | 9.325E-01 | 0.985 | pan | Severe COVID-19 |
| 17726_3   | SAR1A                       | GTP-binding protein SAR1a                                                                               | Q9NR31 | SAR1A    | NA | Inverse variance weighted | 2  | -0.011 | 0.133 | 9.336E-01 | 0.985 | pan | Severe COVID-19 |
| 18396_10  | AES                         | Amino-terminal enhancer of split                                                                        | Q08117 | TLE5     | NA | Wald ratio                | 1  | 0.025  | 0.302 | 9.342E-01 | 0.985 | pan | Severe COVID-19 |
| 12593_33  | PDRG1                       | p53 and DNA damage-regulated protein 1                                                                  | Q9NUG6 | PDRG1    | NA | Wald ratio                | 1  | 0.023  | 0.279 | 9.344E-01 | 0.985 | pan | Severe COVID-19 |
| 8268_98   | HS3SA                       | Heparan sulfate glucosamine 3-O-sulfotransferase 3A1                                                    | Q9Y663 | HS3ST3A1 | NA | Inverse variance weighted | 2  | 0.027  | 0.331 | 9.346E-01 | 0.985 | pan | Severe COVID-19 |
| 10445_20  | ApoM                        | Apolipoprotein M                                                                                        | O95445 | APOM     | NA | Inverse variance weighted | 2  | 0.030  | 0.367 | 9.347E-01 | 0.985 | pan | Severe COVID-19 |
| 10372_18  | STAT6                       | Signal transducer and activator of transcription 6                                                      | P42226 | STAT6    | NA | Wald ratio                | 1  | 0.018  | 0.220 | 9.350E-01 | 0.985 | pan | Severe COVID-19 |
| 9288_7    | FKBP7                       | Peptidyl-prolyl cis-trans isomerase FKBP7                                                               | Q9Y680 | FKBP7    | NA | Inverse variance weighted | 7  | -0.004 | 0.046 | 9.350E-01 | 0.985 | pan | Severe COVID-19 |
| 8275_31   | PEAR1.ECD                   | Platelet endothelial aggregation receptor 1:Extracellular domain                                        | Q5VY43 | PEAR1    | NA | Inverse variance weighted | 3  | 0.007  | 0.089 | 9.368E-01 | 0.985 | pan | Severe COVID-19 |
| 8245_27   | sICAM-5                     | Intercellular adhesion molecule 5                                                                       | Q9UMF0 | ICAM5    | NA | Inverse variance weighted | 6  | -0.010 | 0.133 | 9.374E-01 | 0.985 | pan | Severe COVID-19 |
| 8398_277  | RAR-responsive protein TIG1 | Retinoic acid receptor responder protein 1                                                              | P49788 | RARRES1  | NA | Inverse variance weighted | 16 | -0.001 | 0.016 | 9.376E-01 | 0.985 | pan | Severe COVID-19 |
| 11178_21  | SVEP1:EGF-like domains 4-6  | Sushi, von Willebrand factor type A, EGF and pentraxin domain-containing protein 1:EGF-like domains 4-6 | Q4LDES | SVEP1    | NA | Inverse variance weighted | 5  | -0.011 | 0.145 | 9.381E-01 | 0.985 | pan | Severe COVID-19 |
| 15626_223 | Perlecan                    | Basement membrane-specific heparan sulfate proteoglycan core protein                                    | P98160 | HSPG2    | NA | Inverse variance weighted | 6  | 0.005  | 0.060 | 9.381E-01 | 0.985 | pan | Severe COVID-19 |
| 13133_73  | LTBP4                       | Latent-transforming growth factor beta-binding protein 4                                                | Q8N251 | LTBP4    | NA | Inverse variance weighted | 2  | 0.027  | 0.358 | 9.395E-01 | 0.985 | pan | Severe COVID-19 |
| 17706_4   | PPR1A                       | Protein phosphatase 1 regulatory subunit 1A                                                             | Q13522 | PPP1R1A  | NA | Wald ratio                | 1  | -0.022 | 0.287 | 9.400E-01 | 0.985 | pan | Severe COVID-19 |
| 13704_5   | HMC52                       | Hydroxymethylglutaryl-CoA synthase, mitochondrial                                                       | P54868 | HMGCS2   | NA | Inverse variance weighted | 2  | -0.024 | 0.316 | 9.406E-01 | 0.985 | pan | Severe COVID-19 |
| 17808_37  | NIT2                        | Omega-amidase NIT2                                                                                      | Q9NQ4R | NIT2     | NA | Inverse variance weighted | 7  | 0.014  | 0.190 | 9.425E-01 | 0.985 | pan | Severe COVID-19 |
| 16324_38  | TLR1:ECD                    | Toll-like receptor 1:Extracellular domain                                                               | Q15399 | TLR1     | NA | Inverse variance weighted | 2  | 0.025  | 0.345 | 9.430E-01 | 0.985 | pan | Severe COVID-19 |
| 9235_3    | PXDC1                       | Plexin domain-containing protein 1                                                                      | Q8IU05 | PLXDC1   | NA | Inverse variance weighted | 6  | 0.006  | 0.078 | 9.433E-01 | 0.985 | pan | Severe COVID-19 |
| 9759_13   | INDO                        | Indoleamine 2,3-dioxygenase 1                                                                           | P14902 | IDO1     | NA | Wald ratio                | 1  | 0.018  | 0.254 | 9.433E-01 | 0.985 | pan | Severe COVID-19 |
| 8974_172  | COF1A                       | Collagen alpha-1(XV) chain                                                                              | P39059 | COL15A1  | NA | Inverse variance weighted | 7  | 0.005  | 0.067 | 9.448E-01 | 0.985 | pan | Severe COVID-19 |
| 15570_99  | Complement receptor type 2  | Complement receptor type 2                                                                              | P20023 | CR2      | NA | Inverse variance weighted | 16 | -0.004 | 0.060 | 9.448E-01 | 0.985 | pan | Severe COVID-19 |
| 3484_60   | Angiotensinogen             | Angiotensinogen                                                                                         | P01019 | AGT      | NA | Inverse variance weighted | 3  | 0.005  | 0.078 | 9.449E-01 | 0.985 | pan | Severe COVID-19 |
| 17231_1   | L-plastin                   | Plastin-2                                                                                               | P13796 | LCP1     | NA | Wald ratio                | 1  | 0.018  | 0.266 | 9.452E-01 | 0.985 | pan | Severe COVID-19 |
| 16057_6   | IGF-II receptor             | Cation-independent mannose-6-phosphate receptor                                                         | P11717 | IGF2R    | NA | Inverse variance weighted | 8  | -0.003 | 0.042 | 9.458E-01 | 0.985 | pan | Severe COVID-19 |
| 4413_3    | SLP1                        | Antileukoprotease                                                                                       | P03973 | SLP1     | NA | Wald ratio                | 1  | -0.022 | 0.319 | 9.459E-01 | 0.985 | pan | Severe COVID-19 |
| 10902_53  | APRV1                       | Retroviral-like aspartic protease 1                                                                     | Q53RT3 | ASPRV1   | NA | Inverse variance weighted | 4  | -0.010 | 0.153 | 9.460E-01 | 0.985 | pan | Severe COVID-19 |
| 13748_4   | MCP-2                       | C-C motif chemokine 8                                                                                   | P80075 | CCL8     | NA | Inverse variance weighted | 10 | 0.006  | 0.088 | 9.461E-01 | 0.985 | pan | Severe COVID-19 |
| 8660_5    | OLF3                        | Olfactomedin-like protein 3                                                                             | Q9NRN5 | OLFML3   | NA | Inverse variance weighted | 5  | -0.008 | 0.117 | 9.464E-01 | 0.985 | pan | Severe COVID-19 |
| 11377_19  | ADH7                        | Alcohol dehydrogenase class 4 mu/sigma chain                                                            | P40394 | ADH7     | NA | Inverse variance weighted | 3  | -0.004 | 0.052 | 9.468E-01 | 0.985 | pan | Severe COVID-19 |
| 3554_24   | Adiponectin                 | Adiponectin                                                                                             | Q15848 | ADIPOQ   | NA | Inverse variance weighted | 15 | 0.004  | 0.063 | 9.471E-01 | 0.985 | pan | Severe COVID-19 |
| 6379_62   | ATL2                        | ADAMTS-like protein 2                                                                                   | Q86TH1 | ADAMTSL2 | NA | Inverse variance weighted | 2  | -0.023 | 0.354 | 9.472E-01 | 0.985 | pan | Severe COVID-19 |
| 19370_30  | HS3SA                       | Heparan sulfate glucosamine 3-O-sulfotransferase 4                                                      | Q9Y661 | HS3ST4   | NA | Wald ratio                | 1  | 0.015  | 0.232 | 9.477E-01 | 0.985 | pan | Severe COVID-19 |
| 5508_62   | Cathepsin D                 | Cathepsin D                                                                                             | P07339 | CTSD     | NA | Inverse variance weighted | 6  | 0.006  | 0.093 | 9.494E-01 | 0.985 | pan | Severe COVID-19 |
| 8356_88   | NEU1                        | Oxytocin-neurophysin 1                                                                                  | P01178 | OXT      | NA | Inverse variance weighted | 4  | -0.005 | 0.085 | 9.495E-01 | 0.985 | pan | Severe COVID-19 |
| 4913_78   | HCC-4                       | C-C motif chemokine 16                                                                                  | O15467 | CCL16    | NA | Inverse variance weighted | 8  | -0.006 | 0.087 | 9.497E-01 | 0.985 | pan | Severe COVID-19 |
| 5688_65   | CBLN4                       | Cerebellin-4                                                                                            | Q9NTU7 | CBLN4    | NA | Inverse variance weighted | 6  | -0.006 | 0.089 | 9.498E-01 | 0.985 | pan | Severe COVID-19 |
| 10428_1   | KI252                       | Killer cell immunoglobulin-like receptor 2D52                                                           | P43631 | KIR2D52  | NA | Inverse variance weighted | 9  | 0.005  | 0.083 | 9.499E-01 | 0.985 | pan | Severe COVID-19 |
| 19141_22  | DAP1                        | Death-associated protein 1                                                                              | P51397 | DAP      | NA | Inverse variance weighted | 7  | 0.006  | 0.099 | 9.500E-01 | 0.985 | pan | Severe COVID-19 |
| 16823_75  | APOL3                       | Apolipoprotein L3                                                                                       | O95236 | APOL3    | NA | Inverse variance weighted | 8  | -0.002 | 0.033 | 9.503E-01 | 0.985 | pan | Severe COVID-19 |
| 8958_51   | CHL1                        | Neural cell adhesion molecule L1-like protein                                                           | O00533 | CHL1     | NA | Inverse variance weighted | 8  | 0.005  | 0.085 | 9.507E-01 | 0.985 | pan | Severe COVID-19 |
| 12689_56  | ARCB1B                      | Actin-related protein 2/3 complex subunit 1B                                                            | O15143 | ARPC1B   | NA | Wald ratio                | 1  | 0.011  | 0.177 | 9.511E-01 | 0.985 | pan | Severe COVID-19 |
| 9995_6    | DUT                         | Deoxyuridine 5'-triphosphate nucleotidohydrolase, mitochondrial                                         | P33316 | DUT      | NA | Wald ratio                | 1  | 0.014  | 0.239 | 9.527E-01 | 0.985 | pan | Severe COVID-19 |
| 17404_5   | ARLSB                       | ADP-ribosylation factor-like protein 5B                                                                 | Q96KC2 | ARLSB    | NA | Wald ratio                | 1  | 0.025  | 0.422 | 9.529E-01 | 0.985 | pan | Severe COVID-19 |
| 18275_5   | CRIP1                       | Cysteine-rich protein 1                                                                                 | P50238 | CRIP1    | NA | Inverse variance weighted | 11 | -0.004 | 0.075 | 9.529E-01 | 0.985 | pan | Severe COVID-19 |
| 13123_3   | FLRT3:ECD                   | Leucine-rich repeat transmembrane protein FLRT3:Extracellular domain                                    | Q9NZU0 | FLRT3    | NA | Inverse variance weighted | 9  | 0.002  | 0.027 | 9.544E-01 | 0.985 | pan | Severe COVID-19 |
| 2580_83   | Myeloperoxidase             | Myeloperoxidase                                                                                         | P05164 | MPO      | NA | Inverse variance weighted | 10 | 0.007  | 0.128 | 9.546E-01 | 0.985 | pan | Severe COVID-19 |
| 19229_92  | HOM1E1                      | Homer protein homolog 1                                                                                 | Q86YM7 | HOMER1   | NA | Inverse variance weighted | 4  | 0.008  | 0.148 | 9.553E-01 | 0.985 | pan | Severe COVID-19 |
| 12510_3   | STAP1                       | Signal-transducing adaptor protein 1                                                                    | Q8UL22 | STAP1    | NA | Wald ratio                | 1  | -0.013 | 0.226 | 9.558E-01 | 0.985 | pan | Severe COVID-19 |
| 10419_1   | SCAR5                       | Scavenger receptor class A member 5                                                                     | Q6ZMJ2 | SCAR5    | NA | Inverse variance weighted | 10 | 0.005  | 0.086 | 9.563E-01 | 0.985 | pan | Severe COVID-19 |
| 5483_1    | RGMA                        | Repulsive guidance molecule A                                                                           | Q96B86 | RGMA     | NA | Inverse variance weighted | 8  | 0.007  | 0.129 | 9.566E-01 | 0.985 | pan | Severe COVID-19 |
| 19124_9   | UBCP1                       | Ubiquitin-like domain-containing CTD phosphatase 1                                                      | Q8WVY7 | UBCLP1   | NA | Inverse variance weighted | 5  | 0.006  | 0.104 | 9.576E-01 | 0.985 | pan | Severe COVID-19 |
| 5085_18   | IL-20 Ra                    | Interleukin-20 receptor subunit alpha                                                                   | Q9UHF4 | IL20RA   | NA | Wald ratio                | 1  | -0.020 | 0.379 | 9.579E-01 | 0.985 | pan | Severe COVID-19 |
| 13112_179 | FSTL1                       | Follistatin-related protein 1                                                                           | Q12841 | FSTL1    | NA | Inverse variance weighted | 4  | 0.009  | 0.180 | 9.580E-01 | 0.985 | pan | Severe COVID-19 |
| 3298_52   | Contactin-4                 | Contactin-4                                                                                             | Q8IWV2 | CNTN4    | NA | Inverse variance weighted | 8  | 0.002  | 0.046 | 9.581E-01 | 0.985 | pan | Severe COVID-19 |
| 3440_7    | granzyme A                  | Granzyme A                                                                                              | P12544 | GZMA     | NA | Inverse variance weighted | 8  | -0.003 | 0.053 | 9.592E-01 | 0.985 | pan | Severe COVID-19 |
| 7999_23   | CD39                        | Ectonucleoside triphosphate diphosphohydrolase 1                                                        | P49961 | ENTPD1   | NA | Inverse variance weighted | 3  | -0.008 | 0.159 | 9.592E-01 | 0.985 | pan | Severe COVID-19 |
| 12551_3   | ITCH                        | E3 ubiquitin-protein ligase Itchy homolog                                                               | Q96102 | ITCH     | NA | Inverse variance weighted | 2  | -0.022 | 0.435 | 9.602E-01 | 0.985 | pan | Severe COVID-19 |
| 13464_8   | NRAC                        | Nutritionally-regulated adipose and cardiac enriched protein homolog                                    | Q8N912 | NRAC     | NA | Inverse variance weighted | 3  | -0.009 | 0.187 | 9.613E-01 | 0.985 | pan | Severe COVID-19 |
| 16926_44  | Alkaline phosphatase, liver | Alkaline phosphatase, tissue-nonspecific isozyme                                                        | P05186 | ALPL     | NA | Inverse variance weighted | 3  | 0.009  | 0.193 | 9.620E-01 | 0.985 | pan | Severe COVID-19 |
| 4866_59   | TrkB                        | BDNF/NT-3 growth factors receptor                                                                       | Q16620 | NTKR2    | NA | Inverse variance weighted | 2  | -0.015 | 0.325 | 9.628E-01 | 0.985 | pan | Severe COVID-19 |
| 5609_92   | F19A5                       | Protein FAM19A5                                                                                         | Q7Z5A7 | TAFAS    | NA | Wald ratio                | 1  | -0.015 | 0.326 | 9.631E-01 | 0.985 | pan | Severe COVID-19 |
| 6471_53   | FHR4                        | Complement factor H-related protein 4                                                                   | Q92496 | CFHR4    | NA | Inverse variance weighted | 19 | 0.002  | 0.045 | 9.634E-01 | 0.985 | pan | Severe COVID-19 |
| 6257_56   | CGRF1                       | Cell growth regulator with EF hand domain protein 1                                                     | Q99674 | CGRF1    | NA | Inverse variance weighted | 4  | -0.008 | 0.172 | 9.636E-01 | 0.985 | pan | Severe COVID-19 |
| 5658_64   | coagulation factor XIII B   | Coagulation factor XIII B chain                                                                         | P05160 | F13B     | NA | Inverse variance weighted | 3  | -0.013 | 0.282 | 9.636E-01 | 0.985 | pan | Severe COVID-19 |
| 2819_23   | Cadherin-5                  | Cadherin-5                                                                                              | P33151 | CDH5     | NA | Inverse variance weighted | 5  | -0.005 | 0.106 | 9.641E-01 | 0.985 | pan | Severe COVID-19 |
| 12831_21  | TESC                        | Calcineurin B homologous protein 3                                                                      | Q96852 | TESC     | NA | Inverse variance weighted | 11 | -0.002 | 0.048 | 9.649E-01 | 0.985 | pan | Severe COVID-19 |
| 8364_74   | UST                         | Uronyl 2-sulfotransferase                                                                               | Q9Y2C2 | UST      | NA | Inverse variance weighted | 5  | -0.005 | 0.110 | 9.659E-01 | 0.985 | pan | Severe COVID-19 |
| 6060_2    | PIP                         | Prolactin-inducible protein                                                                             | P12273 | PIP      | NA | Inverse variance weighted | 8  | -0.003 | 0.082 | 9.663E-01 | 0.985 | pan | Severe COVID-19 |
| 13686_2   | IL-5 Ra                     | Interleukin-5 receptor subunit alpha                                                                    | Q01344 | IL5RA    | NA | Inverse variance weighted | 15 | -0.002 | 0.047 | 9.671E-01 | 0.985 | pan | Severe COVID-19 |
| 17722_5   | FKBP52 protein              | Peptidyl-prolyl cis-trans isomerase FKBP4                                                               | Q02790 | FKBP4    | NA | Inverse variance weighted | 2  | 0.010  | 0.237 | 9.673E-01 | 0.985 | pan | Severe COVID-19 |
| 19136_22  | MMSA                        | Methylmalonate-semialdehyde dehydrogenase [acylating], mitochondrial                                    | Q02252 | ALDH6A1  | NA | Inverse variance weighted | 2  | -0.011 | 0.265 | 9.675E-01 | 0.985 | pan | Severe COVID-19 |
| 18197_97  | KCRS                        | Creatine kinase S-type, mitochondrial                                                                   | P17540 | KCRT2    | NA | Inverse variance weighted | 2  | 0.008  | 0.211 | 9.682E-01 | 0.985 | pan | Severe COVID-19 |
| 18343_10  | DECR2                       | Peroxisomal 2,4-dienoyl-CoA reductase                                                                   | Q9NUJ1 | DECR2    | NA | Inverse variance weighted | 8  | -0.003 | 0.072 | 9.687E-01 | 0.985 | pan | Severe COVID-19 |
| 7945_10   | Semaphorin-6A               | Semaphorin-6A                                                                                           | Q9H26A | SEMA6A   | NA | Inverse variance weighted | 5  | 0.004  | 0.102 | 9.693E-01 | 0.985 | pan | Severe COVID-19 |
| 10953_14  | CLC2A                       | C-type lectin domain family 2 member A                                                                  | Q6UVW9 | CLEC2A   | NA | Inverse variance weighted | 4  | 0.004  | 0.102 | 9.694E-01 | 0.985 | pan | Severe COVID-19 |
| 2632_5    | IL-12 Rb1                   | Interleukin-12 receptor subunit beta-1                                                                  | P42701 | IL12RB1  | NA | Wald ratio                | 1  | 0.007  | 0.193 | 9.698E-01 | 0.985 | pan | Severe COVID-19 |

|           |                                  |                                                                     |        |          |    |                           |    |        |       |           |       |     |                       |
|-----------|----------------------------------|---------------------------------------------------------------------|--------|----------|----|---------------------------|----|--------|-------|-----------|-------|-----|-----------------------|
| 12329_21  | KS6A1                            | Ribosomal protein S6 kinase alpha-1                                 | Q15418 | RPS6KA1  | NA | Inverse variance weighted | 10 | -0.005 | 0.130 | 9.703E-01 | 0.985 | pan | Severe COVID-19       |
| 9839_148  | Tirap                            | Toll/interleukin-1 receptor domain-containing adapter protein       | P58753 | TIRAP    | NA | Inverse variance weighted | 3  | -0.006 | 0.158 | 9.710E-01 | 0.985 | pan | Severe COVID-19       |
| 5028_59   | sCD163                           | Scavenger receptor cysteine-rich type 1 protein M130                | Q86V87 | CD163    | NA | Inverse variance weighted | 11 | 0.003  | 0.081 | 9.712E-01 | 0.985 | pan | Severe COVID-19       |
| 8028_22   | SPINK5                           | Serine protease inhibitor Kazal-type 5                              | Q9NQ38 | SPINK5   | NA | Inverse variance weighted | 2  | 0.008  | 0.230 | 9.717E-01 | 0.985 | pan | Severe COVID-19       |
| 6081_52   | PCOC2                            | Procollagen C-endopeptidase enhancer 2                              | Q9UKZ9 | PCOLCE2  | NA | Inverse variance weighted | 15 | -0.001 | 0.040 | 9.722E-01 | 0.985 | pan | Severe COVID-19       |
| 19213_1   | ISK4                             | Serine protease inhibitor Kazal-type 4                              | Q60575 | SPINK4   | NA | Wald ratio                | 1  | 0.002  | 0.073 | 9.727E-01 | 0.985 | pan | Severe COVID-19       |
| 14294_61  | MBD1                             | Methyl-CpG-binding domain protein 1                                 | Q9UI59 | MBD1     | NA | Inverse variance weighted | 3  | -0.006 | 0.180 | 9.728E-01 | 0.985 | pan | Severe COVID-19       |
| 15395_15  | GST M1-1                         | Glutathione S-transferase Mu 1                                      | P09488 | GSTM1    | NA | Inverse variance weighted | 7  | 0.003  | 0.103 | 9.733E-01 | 0.985 | pan | Severe COVID-19       |
| 13397_88  | HBD-2                            | Beta-defensin 4A                                                    | O15263 | DEFB4A   | NA | Inverse variance weighted | 4  | 0.003  | 0.088 | 9.742E-01 | 0.985 | pan | Severe COVID-19       |
| 3172_28   | ARSB                             | Arylsulfatase B                                                     | P15848 | ARSB     | NA | Inverse variance weighted | 2  | 0.003  | 0.104 | 9.750E-01 | 0.985 | pan | Severe COVID-19       |
| 5353_89   | IL-1Ra                           | Interleukin-1 receptor antagonist protein                           | P18510 | IL1RN    | NA | Inverse variance weighted | 4  | 0.007  | 0.208 | 9.750E-01 | 0.985 | pan | Severe COVID-19       |
| 2212_69   | tPA                              | Tissue-type plasminogen activator                                   | P00750 | PLAT     | NA | Inverse variance weighted | 9  | -0.004 | 0.118 | 9.753E-01 | 0.985 | pan | Severe COVID-19       |
| 10627_87  | APLP2                            | Amyloid-like protein 2                                              | Q06481 | APLP2    | NA | Inverse variance weighted | 2  | -0.005 | 0.167 | 9.760E-01 | 0.985 | pan | Severe COVID-19       |
| 10900_272 | STMN2                            | Stathmin-2                                                          | Q93045 | STMN2    | NA | Wald ratio                | 1  | 0.010  | 0.327 | 9.761E-01 | 0.985 | pan | Severe COVID-19       |
| 5108_72   | Notch-3                          | Neurogenic locus notch homolog protein 3                            | Q9UM47 | NOTCH3   | NA | Inverse variance weighted | 2  | 0.005  | 0.159 | 9.766E-01 | 0.985 | pan | Severe COVID-19       |
| 5618_50   | FAM38                            | Protein FAM38                                                       | P58499 | FAM38    | NA | Inverse variance weighted | 2  | 0.012  | 0.411 | 9.771E-01 | 0.985 | pan | Severe COVID-19       |
| 9264_11   | CATO                             | Cathepsin O                                                         | P43234 | CTSO     | NA | Inverse variance weighted | 3  | 0.003  | 0.094 | 9.772E-01 | 0.985 | pan | Severe COVID-19       |
| 12338_27  | EGFLA                            | Pikachurin                                                          | Q63HQ2 | EGFLAM   | NA | Inverse variance weighted | 3  | 0.002  | 0.064 | 9.779E-01 | 0.985 | pan | Severe COVID-19       |
| 19143_38  | NBSR2                            | NADH-cytochrome b5 reductase 2                                      | Q6BCY4 | CYBSR2   | NA | Inverse variance weighted | 7  | 0.002  | 0.062 | 9.789E-01 | 0.985 | pan | Severe COVID-19       |
| 5630_48   | CM35H                            | CMRF35-like molecule 8                                              | Q9UGN4 | CD300A   | NA | Inverse variance weighted | 13 | -0.001 | 0.029 | 9.793E-01 | 0.985 | pan | Severe COVID-19       |
| 9340_17   | FKB14                            | Peptidyl-prolyl cis-trans isomerase FKBP14                          | Q9NWM8 | FKBP14   | NA | Wald ratio                | 1  | 0.008  | 0.311 | 9.795E-01 | 0.985 | pan | Severe COVID-19       |
| 4469_78   | ST456                            | Carbohydrate sulfotransferase 15                                    | Q7LFX5 | CHST15   | NA | Inverse variance weighted | 3  | -0.003 | 0.116 | 9.796E-01 | 0.985 | pan | Severe COVID-19       |
| 12663_1   | THTR                             | Thiosulfate sulfurtransferase                                       | Q16762 | TST      | NA | Inverse variance weighted | 15 | -0.001 | 0.045 | 9.797E-01 | 0.985 | pan | Severe COVID-19       |
| 15565_102 | CA125                            | Mucin-16                                                            | Q8WXI7 | MUC16    | NA | Inverse variance weighted | 8  | 0.002  | 0.075 | 9.798E-01 | 0.985 | pan | Severe COVID-19       |
| 19614_8   | Holo-TC I                        | Transcobalamin-1                                                    | P20061 | TCN1     | NA | Inverse variance weighted | 12 | 0.001  | 0.038 | 9.808E-01 | 0.985 | pan | Severe COVID-19       |
| 2994_71   | IL-1Rrp2                         | Interleukin-1 receptor-like 2                                       | Q9HB29 | IL1RL2   | NA | Wald ratio                | 1  | -0.003 | 0.106 | 9.810E-01 | 0.985 | pan | Severe COVID-19       |
| 2617_56   | ERBB3                            | Receptor tyrosine-protein kinase erbB-3                             | P21860 | ERBB3    | NA | Inverse variance weighted | 2  | 0.008  | 0.369 | 9.816E-01 | 0.985 | pan | Severe COVID-19       |
| 5116_62   | ROBO2                            | Roundabout homolog 2                                                | Q9HCK4 | ROBO2    | NA | Inverse variance weighted | 2  | 0.004  | 0.173 | 9.817E-01 | 0.985 | pan | Severe COVID-19       |
| 8243_55   | TATI                             | Serine protease inhibitor Kazal-type 1                              | P00995 | SPINK1   | NA | Inverse variance weighted | 2  | -0.004 | 0.162 | 9.818E-01 | 0.985 | pan | Severe COVID-19       |
| 5638_23   | GT251                            | Procollagen galactosyltransferase 1                                 | Q8NBJS | COLGALT1 | NA | Inverse variance weighted | 9  | -0.002 | 0.079 | 9.823E-01 | 0.985 | pan | Severe COVID-19       |
| 8664_36   | PKDCC                            | Extracellular tyrosine-protein kinase PKDCC                         | Q504Y2 | PKDCC    | NA | Inverse variance weighted | 2  | 0.012  | 0.558 | 9.825E-01 | 0.985 | pan | Severe COVID-19       |
| 18243_9   | Cytidylate kinase                | UMP-CMP kinase                                                      | P30085 | CMKP1    | NA | Wald ratio                | 1  | 0.004  | 0.195 | 9.834E-01 | 0.985 | pan | Severe COVID-19       |
| 2602_2    | Angiopoietin-2                   | Angiopoietin-2                                                      | O15123 | ANGPT2   | NA | Inverse variance weighted | 3  | 0.002  | 0.101 | 9.837E-01 | 0.985 | pan | Severe COVID-19       |
| 13657_2   | PNKP                             | Bifunctional polynucleotide phosphatase/kinase                      | Q96T60 | PNKP     | NA | Wald ratio                | 1  | 0.003  | 0.147 | 9.839E-01 | 0.985 | pan | Severe COVID-19       |
| 3806_55   | EphA5                            | Ephrin type-A receptor 5                                            | P54756 | EPHA5    | NA | Inverse variance weighted | 3  | -0.002 | 0.122 | 9.840E-01 | 0.985 | pan | Severe COVID-19       |
| 5030_52   | SIRT2                            | NAD-dependent protein deacetylase sirtuin-2                         | Q8IXJ6 | SIRT2    | NA | Inverse variance weighted | 6  | 0.004  | 0.198 | 9.847E-01 | 0.985 | pan | Severe COVID-19       |
| 7210_25   | Amyloid-like protein 1           | Amyloid-like protein 1                                              | P51693 | ALPL1    | NA | Wald ratio                | 1  | 0.008  | 0.438 | 9.851E-01 | 0.985 | pan | Severe COVID-19       |
| 12033_3   | BUB1                             | Mitotic checkpoint serine/threonine-protein kinase BUB1             | O43683 | BUB1     | NA | Wald ratio                | 1  | -0.004 | 0.231 | 9.855E-01 | 0.985 | pan | Severe COVID-19       |
| 5465_32   | H6ST1                            | Heparan-sulfate 6-O-sulfotransferase 1                              | O60243 | H56ST1   | NA | Inverse variance weighted | 2  | -0.002 | 0.091 | 9.860E-01 | 0.985 | pan | Severe COVID-19       |
| 5736_1    | TRML2                            | Trem-like transcript 2 protein                                      | Q5T2D2 | TREML2   | NA | Inverse variance weighted | 5  | -0.001 | 0.040 | 9.866E-01 | 0.985 | pan | Severe COVID-19       |
| 15368_3   | BMPER                            | BMF-binding endothelial regulator protein                           | Q8NB09 | BMPER    | NA | Inverse variance weighted | 3  | 0.002  | 0.105 | 9.867E-01 | 0.985 | pan | Severe COVID-19       |
| 14012_17  | LGP2                             | Probable ATP-dependent RNA helicase DHX58                           | Q96C10 | DHX58    | NA | Inverse variance weighted | 3  | -0.002 | 0.133 | 9.877E-01 | 0.985 | pan | Severe COVID-19       |
| 10948_14  | PLD3                             | Phospholipase D3                                                    | Q8IV08 | PLD3     | NA | Wald ratio                | 1  | 0.004  | 0.265 | 9.883E-01 | 0.985 | pan | Severe COVID-19       |
| 6550_4    | ICAM4                            | Intercellular adhesion molecule 4                                   | Q14773 | ICAM4    | NA | Inverse variance weighted | 13 | -0.001 | 0.051 | 9.894E-01 | 0.985 | pan | Severe COVID-19       |
| 19130_81  | SPB8                             | Serpin B8                                                           | P50452 | SERPINB8 | NA | Inverse variance weighted | 3  | -0.001 | 0.104 | 9.899E-01 | 0.985 | pan | Severe COVID-19       |
| 5703_26   | NOE1                             | Noelin                                                              | Q99784 | OLFM1    | NA | Inverse variance weighted | 3  | -0.002 | 0.120 | 9.900E-01 | 0.985 | pan | Severe COVID-19       |
| 15525_294 | ADH1G                            | Alcohol dehydrogenase 1C                                            | P00326 | ADH1C    | NA | Wald ratio                | 1  | -0.001 | 0.116 | 9.901E-01 | 0.985 | pan | Severe COVID-19       |
| 6520_87   | MGP                              | Matrix Gla protein                                                  | P08493 | MGP      | NA | Inverse variance weighted | 2  | -0.002 | 0.215 | 9.909E-01 | 0.985 | pan | Severe COVID-19       |
| 7787_25   | LIRA5                            | Leukocyte immunoglobulin-like receptor subfamily A member 5         | A6N173 | LIRA5    | NA | Wald ratio                | 1  | -0.003 | 0.304 | 9.909E-01 | 0.985 | pan | Severe COVID-19       |
| 5676_54   | ASIP                             | Agouti-signaling protein                                            | P42127 | ASIP     | NA | Inverse variance weighted | 10 | 0.001  | 0.093 | 9.911E-01 | 0.985 | pan | Severe COVID-19       |
| 19113_66  | SH3L2                            | SH3 domain-binding glutamic acid-rich-like protein 2                | Q9UIC5 | SH3BGR2  | NA | Wald ratio                | 1  | -0.002 | 0.144 | 9.913E-01 | 0.985 | pan | Severe COVID-19       |
| 3434_34   | FN1.3                            | Fibronectin Fragment 3                                              | P02751 | FN1      | NA | Wald ratio                | 1  | 0.002  | 0.222 | 9.918E-01 | 0.985 | pan | Severe COVID-19       |
| 18864_7   | TRY3                             | Trypsin-3                                                           | P35030 | PRSS3    | NA | Inverse variance weighted | 29 | 0.000  | 0.030 | 9.923E-01 | 0.985 | pan | Severe COVID-19       |
| 13130_150 | HXX2                             | Hexokinase-2                                                        | P52789 | HK2      | NA | Inverse variance weighted | 2  | -0.002 | 0.186 | 9.925E-01 | 0.985 | pan | Severe COVID-19       |
| 18241_18  | HEM6                             | Oxygen-dependent coproporphyrinogen-III oxidase, mitochondrial      | P36551 | CPOX     | NA | Inverse variance weighted | 10 | -0.001 | 0.083 | 9.926E-01 | 0.985 | pan | Severe COVID-19       |
| 3232_28   | TrATPase                         | Tartrate-resistant acid phosphatase type 5                          | P13686 | ACP5     | NA | Inverse variance weighted | 6  | -0.001 | 0.068 | 9.928E-01 | 0.985 | pan | Severe COVID-19       |
| 4187_49   | 6-Phosphogluconate dehydrogenase | 6-phosphogluconate dehydrogenase, decarboxylating                   | P52209 | PGD      | NA | Wald ratio                | 1  | 0.002  | 0.198 | 9.936E-01 | 0.985 | pan | Severe COVID-19       |
| 14134_49  | AMG02                            | Amphoterin-induced protein 2                                        | Q86512 | AMIGO2   | NA | Inverse variance weighted | 3  | 0.001  | 0.139 | 9.940E-01 | 0.985 | pan | Severe COVID-19       |
| 9525_1    | PTK7                             | Inactive tyrosine-protein kinase 7                                  | Q13308 | PTK7     | NA | Inverse variance weighted | 4  | 0.001  | 0.240 | 9.951E-01 | 0.985 | pan | Severe COVID-19       |
| 9234_8    | TWSG1                            | Twisted gastrulation protein homolog 1                              | Q9GZX9 | TWSG1    | NA | Inverse variance weighted | 2  | -0.002 | 0.283 | 9.955E-01 | 0.985 | pan | Severe COVID-19       |
| 17343_6   | SNPH                             | Syntaxin                                                            | O15079 | SNPH     | NA | Inverse variance weighted | 2  | -0.001 | 0.174 | 9.959E-01 | 0.985 | pan | Severe COVID-19       |
| 12703_6   | NEK7                             | Serine/threonine-protein kinase Nek7                                | Q8TDX7 | NEK7     | NA | Wald ratio                | 1  | -0.001 | 0.126 | 9.964E-01 | 0.985 | pan | Severe COVID-19       |
| 8351_17   | PRSS57                           | Serine protease 57                                                  | Q6UWY2 | PRSS57   | NA | Inverse variance weighted | 7  | 0.000  | 0.060 | 9.967E-01 | 0.985 | pan | Severe COVID-19       |
| 16805_5   | PDE5A                            | cGMP-specific 3',5'-cyclic phosphodiesterase                        | Q76074 | PDE5A    | NA | Wald ratio                | 1  | 0.002  | 0.385 | 9.967E-01 | 0.985 | pan | Severe COVID-19       |
| 9297_12   | B3GN8                            | UDP-GlcNAc:betaGal beta-1,3-N-acetylglucosaminyltransferase 8       | Q7Z7M8 | B3GN8    | NA | Inverse variance weighted | 11 | 0.000  | 0.069 | 9.968E-01 | 0.985 | pan | Severe COVID-19       |
| 17677_47  | BY55                             | CD160 antigen                                                       | O95971 | CD160    | NA | Wald ratio                | 1  | 0.000  | 0.137 | 9.972E-01 | 0.985 | pan | Severe COVID-19       |
| 3290_50   | CD109                            | CD109 antigen                                                       | Q6YHK3 | CD109    | NA | Inverse variance weighted | 17 | 0.000  | 0.037 | 9.985E-01 | 0.986 | pan | Severe COVID-19       |
| 2615_60   | Ephrin-A5                        | Ephrin-A5                                                           | P52803 | EFNA5    | NA | Inverse variance weighted | 3  | 0.000  | 0.154 | 1.000E+00 | 0.987 | pan | Severe COVID-19       |
| 13992_12  | NSF                              | Vesicle-fusing ATPase                                               | P46459 | NSF      | NA | Wald ratio                | 1  | -0.614 | 0.146 | 2.642E-05 | 0.046 | pan | Hospitalized COVID-19 |
| 17769_28  | PCNP                             | PEST proteolytic signal-containing nuclear protein                  | Q8WW12 | PCNP     | NA | Wald ratio                | 1  | -0.479 | 0.117 | 4.237E-05 | 0.046 | pan | Hospitalized COVID-19 |
| 12534_10  | CACO2                            | Calcium-binding and coiled-coil domain-containing protein 2         | Q13137 | CALCOCO2 | NA | Wald ratio                | 1  | -0.451 | 0.116 | 1.041E-04 | 0.061 | pan | Hospitalized COVID-19 |
| 10608_9   | HIS1                             | Histatin-1                                                          | P15515 | HTN1     | NA | Inverse variance weighted | 2  | 0.272  | 0.071 | 1.340E-04 | 0.061 | pan | Hospitalized COVID-19 |
| 10346_5   | STAT3                            | Signal transducer and activator of transcription 3                  | P40763 | STAT3    | NA | Inverse variance weighted | 2  | -0.303 | 0.080 | 1.497E-04 | 0.061 | pan | Hospitalized COVID-19 |
| 8255_34   | MRV1                             | Protein MRV1                                                        | Q9Y6F6 | IRAG1    | NA | Inverse variance weighted | 2  | -0.319 | 0.085 | 1.678E-04 | 0.061 | pan | Hospitalized COVID-19 |
| 6359_50   | AGO61                            | Protein O-linked-mannose beta-1,4-N-acetylglucosaminyltransferase 2 | Q8NAT1 | POMGN2   | NA | Inverse variance weighted | 12 | -0.103 | 0.028 | 2.295E-04 | 0.071 | pan | Hospitalized COVID-19 |
| 12387_7   | PDL14                            | PDZ and LIM domain protein 4                                        | P50479 | PDLIM4   | NA | Wald ratio                | 1  | -0.276 | 0.078 | 3.729E-04 | 0.101 | pan | Hospitalized COVID-19 |
| 12656_1   | KLC1                             | Kinesin light chain 1                                               | Q07866 | KLC1     | NA | Wald ratio                | 1  | 0.714  | 0.206 | 5.394E-04 | 0.130 | pan | Hospitalized COVID-19 |
| 13130_150 | HXX2                             | Hexokinase-2                                                        | P52789 | HK2      | NA | Inverse variance weighted | 2  | -0.434 | 0.128 | 7.207E-04 | 0.157 | pan | Hospitalized COVID-19 |

|           |                                 |                                                                                                                                    |        |          |    |                           |    |        |       |           |       |     |                       |
|-----------|---------------------------------|------------------------------------------------------------------------------------------------------------------------------------|--------|----------|----|---------------------------|----|--------|-------|-----------|-------|-----|-----------------------|
| 9638_2    | TIGIT                           | T-cell immunoreceptor with Ig and ITIM domains                                                                                     | Q495A1 | TIGIT    | NA | Wald ratio                | 1  | -0.432 | 0.133 | 1.173E-03 | 0.232 | pan | Hospitalized COVID-19 |
| 2731_29   | NADPH-P450 Oxidoreductase       | NADPH--cytochrome P450 reductase                                                                                                   | P16435 | POR      | NA | Inverse variance weighted | 4  | -0.238 | 0.074 | 1.288E-03 | 0.234 | pan | Hospitalized COVID-19 |
| 4541_49   | CDON                            | Cell adhesion molecule-related/down-regulated by oncogenes                                                                         | Q4KMGO | CDON     | NA | Inverse variance weighted | 5  | 0.083  | 0.026 | 1.610E-03 | 0.270 | pan | Hospitalized COVID-19 |
| 9017_58   | LPH                             | Lactase-phlorizin hydrolase                                                                                                        | P09848 | LCT      | NA | Inverse variance weighted | 14 | -0.054 | 0.017 | 1.782E-03 | 0.277 | pan | Hospitalized COVID-19 |
| 3348_49   | BMP-1                           | Bone morphogenetic protein 1                                                                                                       | P13497 | BMP1     | NA | Wald ratio                | 1  | 0.484  | 0.159 | 2.366E-03 | 0.343 | pan | Hospitalized COVID-19 |
| 18884_22  | DNJB4                           | DnaI homolog subfamily B member 4                                                                                                  | Q9UDY4 | DNAB4    | NA | Inverse variance weighted | 3  | 0.177  | 0.090 | 2.864E-03 | 0.370 | pan | Hospitalized COVID-19 |
| 3415_61   | BSP                             | Bone sialoprotein 2                                                                                                                | P21815 | IBSP     | NA | Inverse variance weighted | 2  | -0.285 | 0.066 | 3.010E-03 | 0.370 | pan | Hospitalized COVID-19 |
| 11543_84  | LIMA1                           | LIM domain and actin-binding protein 1                                                                                             | Q9UHB6 | LIMA1    | NA | Wald ratio                | 1  | 0.476  | 0.161 | 3.057E-03 | 0.370 | pan | Hospitalized COVID-19 |
| 6955_68   | SNX1                            | Sorting nexin-1                                                                                                                    | Q13596 | SNX1     | NA | Wald ratio                | 1  | -0.228 | 0.078 | 3.486E-03 | 0.399 | pan | Hospitalized COVID-19 |
| 8235_48   | SCG1                            | Secretogranin-1                                                                                                                    | P05060 | CHGB     | NA | Inverse variance weighted | 7  | 0.209  | 0.074 | 4.598E-03 | 0.500 | pan | Hospitalized COVID-19 |
| 17806_6   | Syntenin 1                      | Syntenin-1                                                                                                                         | O00560 | SDCBP    | NA | Wald ratio                | 1  | 0.623  | 0.221 | 4.851E-03 | 0.503 | pan | Hospitalized COVID-19 |
| 17447_52  | SFRP4                           | Secreted frizzled-related protein 4                                                                                                | Q6FHJ7 | SFRP4    | NA | Inverse variance weighted | 4  | -0.122 | 0.044 | 5.139E-03 | 0.509 | pan | Hospitalized COVID-19 |
| 18917_53  | Pancreatic alpha-amylase        | Pancreatic alpha-amylase                                                                                                           | P04746 | AMY2A    | NA | Inverse variance weighted | 7  | -0.191 | 0.070 | 6.436E-03 | 0.571 | pan | Hospitalized COVID-19 |
| 2871_73   | RAD51                           | DNA repair protein RAD51 homolog 1                                                                                                 | Q06609 | RAD51    | NA | Wald ratio                | 1  | -0.586 | 0.216 | 6.683E-03 | 0.571 | pan | Hospitalized COVID-19 |
| 10554_23  | BGAL                            | Beta-galactosidase                                                                                                                 | P16278 | GLB1     | NA | Wald ratio                | 1  | 0.617  | 0.228 | 6.815E-03 | 0.571 | pan | Hospitalized COVID-19 |
| 15583_18  | FCRLB                           | Fc receptor-like B                                                                                                                 | Q6BAA4 | FCRLB    | NA | Inverse variance weighted | 4  | 0.152  | 0.056 | 6.816E-03 | 0.571 | pan | Hospitalized COVID-19 |
| 10758_2   | KERA                            | Keratocan                                                                                                                          | O60938 | KERA     | NA | Inverse variance weighted | 2  | -0.330 | 0.125 | 8.537E-03 | 0.688 | pan | Hospitalized COVID-19 |
| 11557_3   | SMUF1                           | E3 ubiquitin-protein ligase SMURF1                                                                                                 | Q9HC77 | SMURF1   | NA | Wald ratio                | 1  | 0.222  | 0.085 | 9.031E-03 | 0.699 | pan | Hospitalized COVID-19 |
| 2864_2    | MEK1                            | Dual specificity mitogen-activated protein kinase 1                                                                                | Q02750 | MAP2K1   | NA | Wald ratio                | 1  | 0.451  | 0.176 | 1.028E-02 | 0.699 | pan | Hospitalized COVID-19 |
| 6620_82   | LIG01                           | Leucine-rich repeat and immunoglobulin-like domain-containing nogo receptor-interacting protein 1                                  | Q9GFE5 | LING01   | NA | Inverse variance weighted | 3  | 0.255  | 0.100 | 1.089E-02 | 0.699 | pan | Hospitalized COVID-19 |
| 10940_25  | SRCA                            | Sarcolumenin                                                                                                                       | Q86TD4 | SRL      | NA | Inverse variance weighted | 3  | 0.120  | 0.047 | 1.098E-02 | 0.699 | pan | Hospitalized COVID-19 |
| 8048_9    | FTMT                            | Ferritin, mitochondrial                                                                                                            | Q8N4E7 | FTMT     | NA | Inverse variance weighted | 8  | -0.141 | 0.055 | 1.120E-02 | 0.699 | pan | Hospitalized COVID-19 |
| 4188_1    | Aflatoxin B1 aldehyde reductase | Aflatoxin B1 aldehyde reductase member 2                                                                                           | O43488 | AKR7A2   | NA | Wald ratio                | 1  | 0.170  | 0.067 | 1.146E-02 | 0.699 | pan | Hospitalized COVID-19 |
| 9754_33   | Quinone reductase 2             | Ribosylidihyronicotinamide dehydrogenase [quinone]                                                                                 | P16083 | NQO2     | NA | Inverse variance weighted | 9  | 0.044  | 0.018 | 1.205E-02 | 0.699 | pan | Hospitalized COVID-19 |
| 19622_7   | Activin A                       | Activin A                                                                                                                          | P08476 | INHBA    | NA | Inverse variance weighted | 2  | 0.351  | 0.141 | 1.250E-02 | 0.699 | pan | Hospitalized COVID-19 |
| 5810_25   | Cripto                          | Teratocarcinoma-derived growth factor 1                                                                                            | P13385 | TGDF1    | NA | Inverse variance weighted | 20 | -0.080 | 0.032 | 1.257E-02 | 0.699 | pan | Hospitalized COVID-19 |
| 3708_62   | a2-Macroglobulin                | Alpha-2-macroglobulin                                                                                                              | P01023 | A2M      | NA | Inverse variance weighted | 2  | -0.299 | 0.120 | 1.266E-02 | 0.699 | pan | Hospitalized COVID-19 |
| 17460_51  | Mx1                             | Interferon-induced GTP-binding protein Mx1                                                                                         | P20591 | MX1      | NA | Inverse variance weighted | 9  | -0.084 | 0.034 | 1.275E-02 | 0.699 | pan | Hospitalized COVID-19 |
| 6342_10   | Nephronectin                    | Nephronectin                                                                                                                       | G6UXI9 | NPNT     | NA | Inverse variance weighted | 4  | 0.237  | 0.095 | 1.275E-02 | 0.699 | pan | Hospitalized COVID-19 |
| 19504_22  | KTHY                            | Thymidylate kinase                                                                                                                 | P23919 | DTYMK    | NA | Inverse variance weighted | 3  | 0.331  | 0.133 | 1.284E-02 | 0.699 | pan | Hospitalized COVID-19 |
| 7257_18   | TIP39                           | Tuberoinfundibular peptide of 39 residues                                                                                          | Q96A98 | PTH2     | NA | Wald ratio                | 1  | 0.679  | 0.277 | 1.416E-02 | 0.752 | pan | Hospitalized COVID-19 |
| 12801_33  | IRF2                            | Interferon regulatory factor 2                                                                                                     | P14316 | IRF2     | NA | Wald ratio                | 1  | -0.488 | 0.200 | 1.464E-02 | 0.759 | pan | Hospitalized COVID-19 |
| 8353_15   | SCN2B                           | Sodium channel subunit beta-2                                                                                                      | O60939 | SCN2B    | NA | Inverse variance weighted | 6  | -0.210 | 0.087 | 1.552E-02 | 0.772 | pan | Hospitalized COVID-19 |
| 12813_18  | EHBP1                           | EH domain-binding protein 1                                                                                                        | Q8ND01 | EHBP1    | NA | Wald ratio                | 1  | -0.497 | 0.206 | 1.559E-02 | 0.772 | pan | Hospitalized COVID-19 |
| 16613_3   | CAD17                           | Cadherin-17                                                                                                                        | Q12864 | CDH17    | NA | Inverse variance weighted | 16 | 0.067  | 0.028 | 1.758E-02 | 0.817 | pan | Hospitalized COVID-19 |
| 5229_90   | IMDH1                           | Inosine-5'-monophosphate dehydrogenase 1                                                                                           | P20839 | IMPDH1   | NA | Inverse variance weighted | 9  | -0.144 | 0.061 | 1.806E-02 | 0.817 | pan | Hospitalized COVID-19 |
| 18376_19  | Myosin light chain 1            | Myosin light chain 3                                                                                                               | P08590 | MYL3     | NA | Inverse variance weighted | 6  | -0.203 | 0.086 | 1.809E-02 | 0.817 | pan | Hospitalized COVID-19 |
| 18216_22  | IL-11 RA                        | Interleukin-11 receptor subunit alpha                                                                                              | Q14626 | IL11RA   | NA | Inverse variance weighted | 7  | -0.146 | 0.062 | 1.834E-02 | 0.817 | pan | Hospitalized COVID-19 |
| 3009_3    | TGF-b R III                     | Transforming growth factor beta receptor type 3                                                                                    | Q03167 | TGFBR3   | NA | Inverse variance weighted | 6  | -0.124 | 0.053 | 1.840E-02 | 0.817 | pan | Hospitalized COVID-19 |
| 13090_17  | S100A6                          | Protein S100-A6                                                                                                                    | P06703 | S100A6   | NA | Inverse variance weighted | 3  | 0.307  | 0.131 | 1.898E-02 | 0.817 | pan | Hospitalized COVID-19 |
| 3175_51   | ATS13                           | A disintegrin and metalloproteinase with thrombospondin motifs 13                                                                  | Q76LX8 | ADAMTS13 | NA | Inverse variance weighted | 13 | -0.064 | 0.027 | 1.913E-02 | 0.817 | pan | Hospitalized COVID-19 |
| 19383_131 | CINP                            | Cyclin-dependent kinase 2-interacting protein                                                                                      | Q9BW66 | CINP     | NA | Wald ratio                | 1  | 0.436  | 0.189 | 2.101E-02 | 0.860 | pan | Hospitalized COVID-19 |
| 5611_56   | D108B                           | Beta-defensin 108B                                                                                                                 | Q8NET1 | DEFB108B | NA | Wald ratio                | 1  | -0.593 | 0.257 | 2.106E-02 | 0.860 | pan | Hospitalized COVID-19 |
| 5478_50   | PSMA                            | Glutamate carboxypeptidase 2                                                                                                       | Q04609 | FOLH1    | NA | Inverse variance weighted | 4  | -0.126 | 0.055 | 2.143E-02 | 0.860 | pan | Hospitalized COVID-19 |
| 12956_40  | KBP                             | KIF1-binding protein                                                                                                               | Q96EK5 | KIFBP    | NA | Wald ratio                | 1  | 0.559  | 0.244 | 2.203E-02 | 0.860 | pan | Hospitalized COVID-19 |
| 5491_12   | Testican-2                      | Testican-2                                                                                                                         | Q92563 | SPOCK2   | NA | Inverse variance weighted | 13 | -0.106 | 0.046 | 2.211E-02 | 0.860 | pan | Hospitalized COVID-19 |
| 12583_77  | ARAF                            | Serine/threonine-protein kinase A-Raf                                                                                              | P10398 | ARAF     | NA | Wald ratio                | 1  | -0.445 | 0.196 | 2.315E-02 | 0.869 | pan | Hospitalized COVID-19 |
| 19196_73  | HOP                             | Homeodomain-only protein                                                                                                           | Q9BPY8 | HOPX     | NA | Wald ratio                | 1  | -0.261 | 0.115 | 2.329E-02 | 0.869 | pan | Hospitalized COVID-19 |
| 4125_52   | sRAGE                           | Advanced glycosylation end product-specific receptor, soluble                                                                      | Q15109 | AGER     | NA | Inverse variance weighted | 46 | -0.072 | 0.032 | 2.355E-02 | 0.869 | pan | Hospitalized COVID-19 |
| 13940_19  | IP16:HN 1                       | Gamma-interferon-inducible protein 16:isoform 2, Hematopoietic expression, interferon-inducible nature, and nuclear localization 1 | P16666 | IF16     | NA | Wald ratio                | 1  | 0.349  | 0.155 | 2.399E-02 | 0.870 | pan | Hospitalized COVID-19 |
| 11103_24  | HSP 27                          | Heat shock protein beta-1                                                                                                          | P04792 | HSPB1    | NA | Inverse variance weighted | 8  | -0.062 | 0.028 | 2.555E-02 | 0.898 | pan | Hospitalized COVID-19 |
| 18188_12  | GATM                            | Glycine amidinotransferase, mitochondrial                                                                                          | P50440 | GATM     | NA | Wald ratio                | 1  | -0.132 | 0.059 | 2.621E-02 | 0.898 | pan | Hospitalized COVID-19 |
| 18382_109 | Catechol O-methyltransferase    | Catechol O-methyltransferase                                                                                                       | P21964 | COMT     | NA | Wald ratio                | 1  | -0.256 | 0.115 | 2.653E-02 | 0.898 | pan | Hospitalized COVID-19 |
| 5008_51   | Mn SOD                          | Superoxide dismutase [Mn], mitochondrial                                                                                           | P04179 | SOD2     | NA | Inverse variance weighted | 4  | 0.232  | 0.105 | 2.711E-02 | 0.898 | pan | Hospitalized COVID-19 |
| 4801_13   | PERL                            | Lactoperoxidase                                                                                                                    | P22079 | LPO      | NA | Inverse variance weighted | 9  | 0.105  | 0.048 | 2.733E-02 | 0.898 | pan | Hospitalized COVID-19 |
| 15678_71  | DKK2                            | Dickkopf-related protein 2                                                                                                         | Q9UBU2 | DKK2     | NA | Inverse variance weighted | 2  | -0.432 | 0.196 | 2.742E-02 | 0.898 | pan | Hospitalized COVID-19 |
| 6617_12   | FCRL6                           | Fc receptor-like protein 6                                                                                                         | G6DN72 | FCRL6    | NA | Wald ratio                | 1  | -0.183 | 0.084 | 2.922E-02 | 0.898 | pan | Hospitalized COVID-19 |
| 13447_42  | SPRN                            | Shadow of prion protein                                                                                                            | Q5BIV9 | SPRN     | NA | Inverse variance weighted | 2  | -0.374 | 0.172 | 2.968E-02 | 0.898 | pan | Hospitalized COVID-19 |
| 3181_50   | Cathepsin S                     | Cathepsin S                                                                                                                        | P25774 | CTSS     | NA | Inverse variance weighted | 11 | -0.085 | 0.039 | 2.973E-02 | 0.898 | pan | Hospitalized COVID-19 |
| 10630_5   | HTAI2                           | Oxidoreductase HTAITP2                                                                                                             | Q9BU93 | HTAITP2  | NA | Inverse variance weighted | 9  | -0.058 | 0.027 | 2.973E-02 | 0.898 | pan | Hospitalized COVID-19 |
| 8337_65   | PTPRU                           | Receptor-type tyrosine-protein phosphatase U                                                                                       | Q92729 | PTPRU    | NA | Inverse variance weighted | 5  | -0.131 | 0.060 | 3.048E-02 | 0.898 | pan | Hospitalized COVID-19 |
| 17513_11  | ANX11                           | Annexin A11                                                                                                                        | P50995 | ANXA11   | NA | Inverse variance weighted | 3  | 0.185  | 0.086 | 3.101E-02 | 0.898 | pan | Hospitalized COVID-19 |
| 12634_79  | BCAR3:Ras-GEF                   | Breast cancer anti-estrogen resistance protein 3:Guanine Nucleotide Exchange Factor Domain                                         | Q75815 | BCAR3    | NA | Inverse variance weighted | 3  | -0.163 | 0.076 | 3.112E-02 | 0.898 | pan | Hospitalized COVID-19 |
| 3038_9    | I-TAC                           | C-X-C motif chemokine 11                                                                                                           | O14625 | CXCL11   | NA | Inverse variance weighted | 8  | -0.101 | 0.047 | 3.117E-02 | 0.898 | pan | Hospitalized COVID-19 |
| 12831_21  | TESC                            | Calcineurin B homologous protein 3                                                                                                 | Q96852 | TESC     | NA | Inverse variance weighted | 11 | 0.075  | 0.035 | 3.121E-02 | 0.898 | pan | Hospitalized COVID-19 |
| 19207_119 | ADK                             | Adenosine kinase                                                                                                                   | P55263 | ADK      | NA | Wald ratio                | 1  | 0.416  | 0.194 | 3.175E-02 | 0.898 | pan | Hospitalized COVID-19 |
| 18931_40  | SLIT3                           | Slit homolog 3 protein                                                                                                             | Q75094 | SLIT3    | NA | Inverse variance weighted | 3  | -0.141 | 0.066 | 3.244E-02 | 0.898 | pan | Hospitalized COVID-19 |
| 5825_49   | IFN-g R1                        | Interferon gamma receptor 1                                                                                                        | P15260 | IFNGR1   | NA | Inverse variance weighted | 3  | -0.242 | 0.114 | 3.325E-02 | 0.898 | pan | Hospitalized COVID-19 |
| 5337_64   | B7-2                            | T-lymphocyte activation antigen CD86                                                                                               | P42081 | CD86     | NA | Wald ratio                | 1  | -0.374 | 0.176 | 3.374E-02 | 0.898 | pan | Hospitalized COVID-19 |
| 4500_50   | SCGF-alpha                      | Stem cell growth factor-alpha                                                                                                      | Q9Y240 | CLEC11A  | NA | Inverse variance weighted | 8  | -0.055 | 0.026 | 3.374E-02 | 0.898 | pan | Hospitalized COVID-19 |
| 18830_1   | Omentin                         | Intellectin-1                                                                                                                      | Q8WWA0 | ITLN1    | NA | Inverse variance weighted | 4  | 0.202  | 0.095 | 3.376E-02 | 0.898 | pan | Hospitalized COVID-19 |
| 10756_34  | UCN3                            | Urocortin-3                                                                                                                        | Q969E3 | UCN3     | NA | Wald ratio                | 1  | -0.335 | 0.159 | 3.519E-02 | 0.898 | pan | Hospitalized COVID-19 |
| 8766_29   | LIRAS                           | Leukocyte immunoglobulin-like receptor subfamily A member 5                                                                        | A6N173 | LILRAS   | NA | Inverse variance weighted | 3  | -0.311 | 0.148 | 3.528E-02 | 0.898 | pan | Hospitalized COVID-19 |
| 15339_32  | COF2                            | Cofilin-2                                                                                                                          | Q9Y281 | CFL2     | NA | Wald ratio                | 1  | 0.181  | 0.086 | 3.577E-02 | 0.898 | pan | Hospitalized COVID-19 |
| 7624_19   | ANK2                            | Ankyrin-2                                                                                                                          | Q01484 | ANK2     | NA | Inverse variance weighted | 5  | 0.138  | 0.066 | 3.723E-02 | 0.898 | pan | Hospitalized COVID-19 |
| 11212_7   | TXND5                           | Thioredoxin domain-containing protein 5                                                                                            | Q8NB59 | TXND5    | NA | Inverse variance weighted | 5  | 0.121  | 0.058 | 3.834E-02 | 0.898 | pan | Hospitalized COVID-19 |
| 19127_1   | HSPB6                           | Heat shock protein beta-6                                                                                                          | O14558 | HSPB6    | NA | Wald ratio                | 1  | 0.513  | 0.248 | 3.841E-02 | 0.898 | pan | Hospitalized COVID-19 |
| 10440_26  | ACAM:ECD                        | CXADR-like membrane protein:Extracellular domain                                                                                   | Q9HB84 | CLMP     | NA | Inverse variance weighted | 3  | 0.096  | 0.047 | 3.901E-02 | 0.898 | pan | Hospitalized COVID-19 |

|           |                              |                                                                                               |        |            |    |                           |    |        |       |           |       |     |                       |
|-----------|------------------------------|-----------------------------------------------------------------------------------------------|--------|------------|----|---------------------------|----|--------|-------|-----------|-------|-----|-----------------------|
| 9779_63   | HERP2                        | Homocysteine-responsive endoplasmic reticulum-resident ubiquitin-like domain member 2 protein | Q9B5E4 | HERPUD2    | NA | Wald ratio                | 1  | 0.462  | 0.224 | 3.906E-02 | 0.898 | pan | Hospitalized COVID-19 |
| 16599_38  | GPN1                         | GPN-loop GTPase 1                                                                             | Q9HCN4 | GPN1       | NA | Inverse variance weighted | 6  | -0.111 | 0.054 | 3.986E-02 | 0.898 | pan | Hospitalized COVID-19 |
| 4911_49   | Glutathione S-transferase Pi | Glutathione S-transferase P                                                                   | P09211 | GSTP1      | NA | Wald ratio                | 1  | -0.154 | 0.075 | 4.025E-02 | 0.898 | pan | Hospitalized COVID-19 |
| 12975_11  | Keratin 20                   | Keratin, type I cytoskeletal 20                                                               | P35900 | KRT20      | NA | Inverse variance weighted | 3  | -0.259 | 0.127 | 4.102E-02 | 0.898 | pan | Hospitalized COVID-19 |
| 11126_102 | TRIO                         | Triple functional domain protein                                                              | Q75962 | TRIO       | NA | Wald ratio                | 1  | -0.471 | 0.231 | 4.132E-02 | 0.898 | pan | Hospitalized COVID-19 |
| 6257_56   | CGRE1                        | Cell growth regulator with EF hand domain protein 1                                           | Q96974 | CGRE1      | NA | Inverse variance weighted | 4  | 0.240  | 0.118 | 4.157E-02 | 0.898 | pan | Hospitalized COVID-19 |
| 17792_158 | SDSH                         | Succinate-semialdehyde dehydrogenase, mitochondrial                                           | P51649 | ALDH5A1    | NA | Inverse variance weighted | 17 | -0.081 | 0.040 | 4.160E-02 | 0.898 | pan | Hospitalized COVID-19 |
| 9173_21   | PGM1                         | Phosphoglucomutase-1                                                                          | P36871 | PGM1       | NA | Wald ratio                | 1  | 0.255  | 0.125 | 4.170E-02 | 0.898 | pan | Hospitalized COVID-19 |
| 6528_95   | EXTL2                        | Exostosin-like 2                                                                              | Q9UBQ6 | EXTL2      | NA | Wald ratio                | 1  | 0.440  | 0.217 | 4.219E-02 | 0.898 | pan | Hospitalized COVID-19 |
| 9599_6    | PIANP                        | PILR alpha-associated neural protein                                                          | Q8IYJ0 | PIANP      | NA | Wald ratio                | 1  | -0.462 | 0.228 | 4.267E-02 | 0.898 | pan | Hospitalized COVID-19 |
| 6404_20   | CIQRF                        | CIq-related factor                                                                            | Q75973 | CIQL1      | NA | Inverse variance weighted | 7  | -0.088 | 0.044 | 4.271E-02 | 0.898 | pan | Hospitalized COVID-19 |
| 13384_110 | FUMH                         | Fumarate hydratase, mitochondrial                                                             | P07954 | FH         | NA | Inverse variance weighted | 2  | 0.278  | 0.138 | 4.356E-02 | 0.898 | pan | Hospitalized COVID-19 |
| 8464_31   | RSPO4                        | R-spondin-4                                                                                   | Q2I0M5 | RSPO4      | NA | Inverse variance weighted | 3  | 0.216  | 0.107 | 4.435E-02 | 0.898 | pan | Hospitalized COVID-19 |
| 14205_6   | HEX12                        | Protein HEXIM2                                                                                | Q96MH2 | HEXIM2     | NA | Wald ratio                | 1  | 0.448  | 0.223 | 4.463E-02 | 0.898 | pan | Hospitalized COVID-19 |
| 13697_51  | GPDA                         | Glycerol-3-phosphate dehydrogenase [NAD(+)], cytoplasmic                                      | P21695 | GPD1       | NA | Wald ratio                | 1  | 0.485  | 0.243 | 4.529E-02 | 0.898 | pan | Hospitalized COVID-19 |
| 9049_2    | MOT4                         | Monocarboxylate transporter 4                                                                 | O15427 | SLC16A3    | NA | Wald ratio                | 1  | 0.517  | 0.259 | 4.597E-02 | 0.898 | pan | Hospitalized COVID-19 |
| 8352_26   | SIG12-Ig-like C2-type 2      | Sialic acid-binding Ig-like lectin 12:Ig-like C2-type 2 domain, Isoform short                 | Q96PQ1 | SIGLEC12   | NA | Wald ratio                | 1  | 0.485  | 0.243 | 4.618E-02 | 0.898 | pan | Hospitalized COVID-19 |
| 15467_10  | CTHR1                        | Collagen triple helix repeat-containing protein 1                                             | Q96C88 | CTHR1      | NA | Inverse variance weighted | 2  | 0.591  | 0.297 | 4.622E-02 | 0.898 | pan | Hospitalized COVID-19 |
| 6506_54   | TMEDA                        | Transmembrane emp24 domain-containing protein 10                                              | P49755 | TMED10     | NA | Inverse variance weighted | 6  | 0.171  | 0.086 | 4.636E-02 | 0.898 | pan | Hospitalized COVID-19 |
| 15388_24  | FCRIIa                       | Low affinity immunoglobulin gamma Fc region receptor III-A                                    | P08637 | FCGR3A     | NA | Inverse variance weighted | 11 | -0.069 | 0.035 | 4.665E-02 | 0.898 | pan | Hospitalized COVID-19 |
| 4254_6    | NUDC3                        | NudC domain-containing protein 3                                                              | Q8IVD9 | NUDCD3     | NA | Wald ratio                | 1  | 0.304  | 0.153 | 4.713E-02 | 0.898 | pan | Hospitalized COVID-19 |
| 11237_49  | PCOC1                        | Procollagen C-endopeptidase enhancer 1                                                        | Q15113 | PCOLCE     | NA | Inverse variance weighted | 4  | 0.231  | 0.116 | 4.719E-02 | 0.898 | pan | Hospitalized COVID-19 |
| 19197_95  | THIL                         | Acetyl-CoA acetyltransferase, mitochondrial                                                   | P24752 | ACAT1      | NA | Inverse variance weighted | 3  | 0.238  | 0.120 | 4.760E-02 | 0.898 | pan | Hospitalized COVID-19 |
| 18231_147 | PRND                         | Prion-like protein doppel                                                                     | Q9UKY0 | PRND       | NA | Wald ratio                | 1  | 0.396  | 0.200 | 4.773E-02 | 0.898 | pan | Hospitalized COVID-19 |
| 8340_9    | DB110                        | Beta-defensin 110                                                                             | Q30KQ9 | DEFB110    | NA | Wald ratio                | 1  | -0.407 | 0.206 | 4.810E-02 | 0.898 | pan | Hospitalized COVID-19 |
| 13988_67  | NMR11                        | NmrA-like family domain-containing protein 1                                                  | Q9HRL8 | NMRAL1     | NA | Inverse variance weighted | 12 | -0.057 | 0.029 | 4.826E-02 | 0.898 | pan | Hospitalized COVID-19 |
| 18183_3   | ARH                          | Low density lipoprotein receptor adapter protein 1                                            | Q5SW96 | LDLRAP1    | NA | Wald ratio                | 1  | -0.251 | 0.127 | 4.849E-02 | 0.898 | pan | Hospitalized COVID-19 |
| 9183_7    | IFN- $\alpha$ /R1            | Interferon alpha/beta receptor 1                                                              | P17181 | IFNAR1     | NA | Inverse variance weighted | 9  | 0.038  | 0.019 | 4.857E-02 | 0.898 | pan | Hospitalized COVID-19 |
| 15333_11  | SDF2                         | Stromal cell-derived factor 2                                                                 | Q99470 | SDF2       | NA | Inverse variance weighted | 8  | 0.126  | 0.064 | 4.877E-02 | 0.898 | pan | Hospitalized COVID-19 |
| 13438_115 | CHRD                         | Chordin                                                                                       | Q9H2X0 | CHRD       | NA | Wald ratio                | 1  | -0.278 | 0.142 | 4.946E-02 | 0.898 | pan | Hospitalized COVID-19 |
| 13476_16  | KIN17                        | DNA/RNA-binding protein KIN17                                                                 | O60870 | KIN        | NA | Wald ratio                | 1  | -0.391 | 0.199 | 4.953E-02 | 0.898 | pan | Hospitalized COVID-19 |
| 3030_3    | DC-SIGNR                     | C-type lectin domain family 4 member M                                                        | Q9H2X3 | CLEC4M     | NA | Wald ratio                | 1  | 0.483  | 0.246 | 4.971E-02 | 0.898 | pan | Hospitalized COVID-19 |
| 8768_4    | Bcl-10                       | B-cell lymphoma/leukemia 10                                                                   | O95999 | BCL10      | NA | Wald ratio                | 1  | 0.438  | 0.224 | 4.999E-02 | 0.898 | pan | Hospitalized COVID-19 |
| 19560_23  | PLXA4                        | Plexin-A4                                                                                     | Q9HCM2 | PLXNA4     | NA | Wald ratio                | 1  | -0.252 | 0.129 | 5.033E-02 | 0.898 | pan | Hospitalized COVID-19 |
| 9377_25   | SCF                          | Kit ligand                                                                                    | P21583 | KITLG      | NA | Inverse variance weighted | 3  | 0.226  | 0.117 | 5.255E-02 | 0.904 | pan | Hospitalized COVID-19 |
| 9971_5    | CSMD2                        | CUB and sushi domain-containing protein 2                                                     | Q7Z408 | CSMD2      | NA | Wald ratio                | 1  | 0.405  | 0.209 | 5.261E-02 | 0.904 | pan | Hospitalized COVID-19 |
| 15486_126 | ABP1                         | Amloride-sensitive amine oxidase [copper-containing]                                          | P19801 | AOC1       | NA | Inverse variance weighted | 12 | -0.034 | 0.017 | 5.288E-02 | 0.904 | pan | Hospitalized COVID-19 |
| 9790_28   | BR serine/threonine kinase 2 | Serine/threonine-protein kinase BRSK2                                                         | Q8IWI3 | BRSK2      | NA | Wald ratio                | 1  | -0.128 | 0.066 | 5.355E-02 | 0.904 | pan | Hospitalized COVID-19 |
| 14088_38  | IGFBP-6                      | Insulin-like growth factor-binding protein 6                                                  | P24592 | IGFBP6     | NA | Inverse variance weighted | 2  | -0.223 | 0.116 | 5.395E-02 | 0.904 | pan | Hospitalized COVID-19 |
| 13105_7   | SNP25                        | Synaptosomal-associated protein 25                                                            | P60880 | SNAP25     | NA | Wald ratio                | 1  | 0.423  | 0.221 | 5.509E-02 | 0.904 | pan | Hospitalized COVID-19 |
| 15322_35  | CRADD                        | Death domain-containing protein CRADD                                                         | P78560 | CRADD      | NA | Inverse variance weighted | 3  | 0.268  | 0.140 | 5.546E-02 | 0.904 | pan | Hospitalized COVID-19 |
| 19614_8   | Holo-TC I                    | Transcobalamin-1                                                                              | P20061 | TCN1       | NA | Inverse variance weighted | 12 | -0.048 | 0.025 | 5.547E-02 | 0.904 | pan | Hospitalized COVID-19 |
| 17785_11  | RCL                          | 2'-deoxynucleoside 5'-phosphate N-hydrolase 1                                                 | O43598 | DNPH1      | NA | Wald ratio                | 1  | -0.271 | 0.142 | 5.620E-02 | 0.904 | pan | Hospitalized COVID-19 |
| 19267_14  | GLO2                         | Hydroxyacylglutathione hydrolase, mitochondrial                                               | Q16775 | HAGH       | NA | Wald ratio                | 1  | 0.132  | 0.069 | 5.629E-02 | 0.904 | pan | Hospitalized COVID-19 |
| 7228_2    | SIATF                        | Alpha-N-acetylgalactosaminide alpha-2,6-sialyltransferase 6                                   | Q969X2 | STGGALNAC6 | NA | Inverse variance weighted | 3  | -0.210 | 0.110 | 5.733E-02 | 0.904 | pan | Hospitalized COVID-19 |
| 8053_16   | DJB14-CD                     | DnaI homolog subfamily B member 14:Cytoplasmic domain                                         | Q8TBM8 | DNAJB14    | NA | Wald ratio                | 1  | 0.328  | 0.173 | 5.758E-02 | 0.904 | pan | Hospitalized COVID-19 |
| 6372_7    | YBOX2                        | Y-box-binding protein 2                                                                       | Q9Y277 | YBX2       | NA | Inverse variance weighted | 2  | 0.313  | 0.165 | 5.768E-02 | 0.904 | pan | Hospitalized COVID-19 |
| 13580_2   | Sperm-associated antigen 2   | UDP-N-acetylhexosamine pyrophosphorylase                                                      | Q16222 | UAAP1      | NA | Wald ratio                | 1  | 0.496  | 0.262 | 5.835E-02 | 0.904 | pan | Hospitalized COVID-19 |
| 5638_23   | GT251                        | Procollagen galactosyltransferase 1                                                           | Q8NBJS | COLGALT1   | NA | Inverse variance weighted | 9  | 0.102  | 0.054 | 5.892E-02 | 0.904 | pan | Hospitalized COVID-19 |
| 9590_10   | COX7R                        | Cytochrome c oxidase subunit 7A-related protein, mitochondrial                                | O14548 | COX7A2L    | NA | Wald ratio                | 1  | 0.460  | 0.244 | 5.913E-02 | 0.904 | pan | Hospitalized COVID-19 |
| 13126_52  | DSC2                         | Desmocollin-2                                                                                 | Q02487 | DSC2       | NA | Inverse variance weighted | 3  | -0.104 | 0.055 | 6.006E-02 | 0.904 | pan | Hospitalized COVID-19 |
| 7124_18   | IL-21                        | Interleukin-21                                                                                | Q9HBE4 | IL21       | NA | Wald ratio                | 1  | 0.292  | 0.155 | 6.026E-02 | 0.904 | pan | Hospitalized COVID-19 |
| 5111_15   | NRX3B                        | Neurexin-3-beta                                                                               | Q9HD05 | NRXN3      | NA | Inverse variance weighted | 3  | 0.253  | 0.135 | 6.100E-02 | 0.904 | pan | Hospitalized COVID-19 |
| 11608_5   | MLP3B                        | Microtubule-associated proteins 1A/1B light chain 3B                                          | Q9GZQ8 | MAP1LC3B   | NA | Wald ratio                | 1  | -0.504 | 0.269 | 6.121E-02 | 0.904 | pan | Hospitalized COVID-19 |
| 6462_12   | TIMP-4                       | Metalloproteinase inhibitor 4                                                                 | Q99727 | TIMP4      | NA | Inverse variance weighted | 8  | -0.063 | 0.033 | 6.158E-02 | 0.904 | pan | Hospitalized COVID-19 |
| 3798_71   | Carbonic anhydrase 9         | Carbonic anhydrase 9                                                                          | Q16790 | CA9        | NA | Wald ratio                | 1  | 0.596  | 0.319 | 6.185E-02 | 0.904 | pan | Hospitalized COVID-19 |
| 11547_84  | MUSK                         | Muscle, skeletal receptor tyrosine-protein kinase                                             | O15146 | MUSK       | NA | Inverse variance weighted | 2  | 0.251  | 0.134 | 6.188E-02 | 0.904 | pan | Hospitalized COVID-19 |
| 7738_299  | STX2                         | Syntaxin-2                                                                                    | P32856 | STX2       | NA | Inverse variance weighted | 3  | 0.246  | 0.132 | 6.196E-02 | 0.904 | pan | Hospitalized COVID-19 |
| 14309_8   | HNRH1                        | Heterogeneous nuclear ribonucleoprotein H                                                     | P31943 | HNRNPH1    | NA | Wald ratio                | 1  | 0.416  | 0.223 | 6.215E-02 | 0.904 | pan | Hospitalized COVID-19 |
| 19206_20  | 8ODP                         | 7,8-dihydro-8-oxoguanine triphosphatase                                                       | P36639 | NUDT1      | NA | Wald ratio                | 1  | 0.182  | 0.098 | 6.296E-02 | 0.904 | pan | Hospitalized COVID-19 |
| 7849_3    | Glutaminy cyclase            | Glutaminy-peptide cyclotransferase                                                            | Q16769 | QPCCT      | NA | Inverse variance weighted | 7  | -0.081 | 0.044 | 6.315E-02 | 0.904 | pan | Hospitalized COVID-19 |
| 15545_13  | Calcineurin B a              | Calcineurin subunit B type 1                                                                  | P63098 | PPP3R1     | NA | Wald ratio                | 1  | -0.315 | 0.170 | 6.418E-02 | 0.904 | pan | Hospitalized COVID-19 |
| 12707_26  | DPYL3                        | Dihydropyrimidinase-related protein 3                                                         | Q14195 | DPYSL3     | NA | Inverse variance weighted | 2  | 0.191  | 0.103 | 6.501E-02 | 0.904 | pan | Hospitalized COVID-19 |
| 18244_1   | ANXA7                        | Annexin A7                                                                                    | P20073 | ANXA7      | NA | Wald ratio                | 1  | 0.446  | 0.243 | 6.602E-02 | 0.904 | pan | Hospitalized COVID-19 |
| 5238_26   | PIIE                         | Peptidyl-prolyl cis-trans isomerase E                                                         | Q9UNP9 | PIIE       | NA | Inverse variance weighted | 3  | 0.066  | 0.036 | 6.628E-02 | 0.904 | pan | Hospitalized COVID-19 |
| 11493_169 | DYL2                         | Dynein light chain 2, cytoplasmic                                                             | Q96FJ2 | DYNL2      | NA | Wald ratio                | 1  | -0.368 | 0.201 | 6.668E-02 | 0.904 | pan | Hospitalized COVID-19 |
| 11568_2   | FKBP1B                       | Peptidyl-prolyl cis-trans isomerase FKBP1B                                                    | P68106 | FKBP1B     | NA | Wald ratio                | 1  | 0.165  | 0.090 | 6.773E-02 | 0.904 | pan | Hospitalized COVID-19 |
| 8221_19   | MIF                          | Macrophage migration inhibitory factor                                                        | P14174 | MIF        | NA | Wald ratio                | 1  | 0.433  | 0.238 | 6.886E-02 | 0.904 | pan | Hospitalized COVID-19 |
| 19279_42  | CRBP                         | Retinol-binding protein 1                                                                     | P09455 | RBP1       | NA | Wald ratio                | 1  | 0.283  | 0.156 | 6.890E-02 | 0.904 | pan | Hospitalized COVID-19 |
| 7926_13   | SPIT3                        | Kunitz-type protease inhibitor 3                                                              | P49223 | SPINT3     | NA | Inverse variance weighted | 4  | 0.123  | 0.067 | 6.917E-02 | 0.904 | pan | Hospitalized COVID-19 |
| 9002_36   | SPA11                        | Serpin A11                                                                                    | Q86U17 | SERPINA11  | NA | Inverse variance weighted | 7  | -0.154 | 0.085 | 6.975E-02 | 0.904 | pan | Hospitalized COVID-19 |
| 2823_7    | COMMD7                       | COMM domain-containing protein 7                                                              | Q86VX2 | COMMD7     | NA | Wald ratio                | 1  | -0.203 | 0.112 | 6.999E-02 | 0.904 | pan | Hospitalized COVID-19 |
| 4140_3    | IL-7                         | Interleukin-7                                                                                 | P13232 | IL7        | NA | Wald ratio                | 1  | 0.412  | 0.228 | 7.002E-02 | 0.904 | pan | Hospitalized COVID-19 |
| 4156_74   | TGF- $\beta$ 2               | Transforming growth factor beta-2                                                             | P61812 | TGFB2      | NA | Wald ratio                | 1  | -0.405 | 0.224 | 7.038E-02 | 0.904 | pan | Hospitalized COVID-19 |
| 5091_28   | ILT-4                        | Leukocyte immunoglobulin-like receptor subfamily B member 2                                   | Q8N423 | LILRB2     | NA | Inverse variance weighted | 3  | -0.270 | 0.150 | 7.095E-02 | 0.904 | pan | Hospitalized COVID-19 |
| 2211_9    | TIMP-1                       | Metalloproteinase inhibitor 1                                                                 | P01033 | TIMP1      | NA | Wald ratio                | 1  | 0.324  | 0.180 | 7.196E-02 | 0.904 | pan | Hospitalized COVID-19 |
| 5735_54   | C1GLC                        | C1GALT1-specific chaperone 1                                                                  | Q96EU7 | C1GALT1C1  | NA | Inverse variance weighted | 3  | 0.099  | 0.055 | 7.235E-02 | 0.904 | pan | Hospitalized COVID-19 |
| 6641_60   | PolyUbiquitin K48            | PolyUbiquitin K48-linked                                                                      | POCG47 | UBB        | NA | Wald ratio                | 1  | -0.361 | 0.201 | 7.248E-02 | 0.904 | pan | Hospitalized COVID-19 |

|           |                                  |                                                                   |         |            |    |                           |    |        |       |           |       |     |                       |
|-----------|----------------------------------|-------------------------------------------------------------------|---------|------------|----|---------------------------|----|--------|-------|-----------|-------|-----|-----------------------|
| 15398_2   | HERV1                            | FAD-linked sulphydryl oxidase ALR                                 | P55789  | GFER       | NA | Wald ratio                | 1  | -0.323 | 0.180 | 7.329E-02 | 0.904 | pan | Hospitalized COVID-19 |
| 6414_8    | OAF                              | Out at first protein homolog                                      | Q86UD1  | OAF        | NA | Inverse variance weighted | 6  | 0.058  | 0.033 | 7.396E-02 | 0.904 | pan | Hospitalized COVID-19 |
| 8346_9    | DPP2                             | Dipeptidyl peptidase 2                                            | Q9UHL4  | DPP7       | NA | Inverse variance weighted | 7  | -0.063 | 0.035 | 7.429E-02 | 0.904 | pan | Hospitalized COVID-19 |
| 3535_84   | DKK1                             | Dickkopf-related protein 1                                        | Q94907  | DKK1       | NA | Wald ratio                | 1  | 0.384  | 0.216 | 7.517E-02 | 0.904 | pan | Hospitalized COVID-19 |
| 10008_43  | GUCA1A                           | Guanylyl cyclase-activating protein 1                             | P43080  | GUCA1A     | NA | Inverse variance weighted | 2  | 0.371  | 0.210 | 7.628E-02 | 0.904 | pan | Hospitalized COVID-19 |
| 5358_3    | OMD                              | Osteomodulin                                                      | Q99983  | OMD        | NA | Inverse variance weighted | 3  | 0.202  | 0.114 | 7.693E-02 | 0.904 | pan | Hospitalized COVID-19 |
| 12940_35  | AL3B1                            | Aldehyde dehydrogenase family 3 member B1                         | P43353  | ALDH3B1    | NA | Wald ratio                | 1  | 0.161  | 0.091 | 7.719E-02 | 0.904 | pan | Hospitalized COVID-19 |
| 9484_75   | Desmoglein-2                     | Desmoglein-2                                                      | Q14126  | DSG2       | NA | Inverse variance weighted | 10 | 0.078  | 0.044 | 7.730E-02 | 0.904 | pan | Hospitalized COVID-19 |
| 5605_77   | MFNG                             | Beta-1,3-N-acetylglucosaminyltransferase manic fringe             | O00587  | MFNG       | NA | Inverse variance weighted | 2  | 0.231  | 0.131 | 7.733E-02 | 0.904 | pan | Hospitalized COVID-19 |
| 8005_1    | MXRA7                            | Matrix-remodeling-associated protein 7                            | P84157  | MXRA7      | NA | Inverse variance weighted | 5  | -0.055 | 0.031 | 7.745E-02 | 0.904 | pan | Hospitalized COVID-19 |
| 18381_16  | ALDH-E2                          | Aldehyde dehydrogenase, mitochondrial                             | P05091  | ALDH2      | NA | Inverse variance weighted | 4  | 0.132  | 0.075 | 7.747E-02 | 0.904 | pan | Hospitalized COVID-19 |
| 6930_95   | SIABF                            | Alpha-2,8-sialyltransferase 8F                                    | P61647  | ST8SIA6    | NA | Wald ratio                | 1  | -0.365 | 0.207 | 7.750E-02 | 0.904 | pan | Hospitalized COVID-19 |
| 9713_67   | PGFRL                            | Platelet-derived growth factor receptor-like protein              | Q15198  | PDGFRL     | NA | Inverse variance weighted | 6  | -0.064 | 0.036 | 7.755E-02 | 0.904 | pan | Hospitalized COVID-19 |
| 10702_1   | COSA1                            | Collagen alpha-1(XXVIII) chain                                    | Q2UY09  | COL28A1    | NA | Inverse variance weighted | 2  | 0.274  | 0.156 | 7.783E-02 | 0.904 | pan | Hospitalized COVID-19 |
| 3077_66   | Coagulation Factor Xa            | Coagulation factor Xa                                             | P00742  | F10        | NA | Inverse variance weighted | 4  | -0.220 | 0.125 | 7.828E-02 | 0.904 | pan | Hospitalized COVID-19 |
| 17828_3   | S100A14                          | Protein S100-A14                                                  | Q9HCY8  | S100A14    | NA | Wald ratio                | 1  | 0.379  | 0.216 | 7.934E-02 | 0.904 | pan | Hospitalized COVID-19 |
| 4831_4    | sL-Selectin                      | L-Selectin                                                        | P14151  | SELL       | NA | Inverse variance weighted | 8  | -0.063 | 0.036 | 7.989E-02 | 0.904 | pan | Hospitalized COVID-19 |
| 16317_20  | Desmoglein-3                     | Desmoglein-3                                                      | P32926  | DSG3       | NA | Inverse variance weighted | 2  | -0.282 | 0.161 | 7.990E-02 | 0.904 | pan | Hospitalized COVID-19 |
| 15321_8   | CPLX2                            | Complexin-2                                                       | Q6PUV4  | CPLX2      | NA | Wald ratio                | 1  | 0.394  | 0.225 | 8.015E-02 | 0.904 | pan | Hospitalized COVID-19 |
| 7923_41   | SEM4C                            | Semaphorin-4C                                                     | Q9C0C4  | SEMA4C     | NA | Inverse variance weighted | 10 | 0.122  | 0.070 | 8.043E-02 | 0.904 | pan | Hospitalized COVID-19 |
| 9359_9    | EGFL9                            | Protein delta homolog 2                                           | Q6UY11  | DLK2       | NA | Wald ratio                | 1  | -0.103 | 0.059 | 8.067E-02 | 0.904 | pan | Hospitalized COVID-19 |
| 7866_11   | DJC30                            | Dnaj homolog subfamily C member 30                                | Q96L19  | DNAJC30    | NA | Inverse variance weighted | 2  | -0.115 | 0.066 | 8.274E-02 | 0.904 | pan | Hospitalized COVID-19 |
| 13733_5   | IL-12 p40                        | Interleukin-12 subunit beta                                       | P29460  | IL12B      | NA | Inverse variance weighted | 16 | -0.068 | 0.039 | 8.316E-02 | 0.904 | pan | Hospitalized COVID-19 |
| 10647_18  | ASCC1                            | Activating signal cointegrator 1 complex subunit 1                | Q8N9N2  | ASCC1      | NA | Wald ratio                | 1  | -0.323 | 0.187 | 8.322E-02 | 0.904 | pan | Hospitalized COVID-19 |
| 15544_25  | kallikrein 14                    | Kallikrein-14                                                     | Q9POG3  | KLK14      | NA | Inverse variance weighted | 5  | -0.162 | 0.094 | 8.353E-02 | 0.904 | pan | Hospitalized COVID-19 |
| 6416_8    | GKN2                             | Gastrophilin-2                                                    | Q86XP6  | GKN2       | NA | Inverse variance weighted | 10 | -0.080 | 0.046 | 8.367E-02 | 0.904 | pan | Hospitalized COVID-19 |
| 12437_18  | ULK3                             | Serine/threonine-protein kinase ULK3                              | Q6PHR2  | ULK3       | NA | Wald ratio                | 1  | 0.361  | 0.209 | 8.371E-02 | 0.904 | pan | Hospitalized COVID-19 |
| 4982_54   | Elafin                           | Elafin                                                            | P19957  | PI3        | NA | Inverse variance weighted | 7  | 0.087  | 0.050 | 8.379E-02 | 0.904 | pan | Hospitalized COVID-19 |
| 16304_6   | LGR4                             | Leucine-rich repeat-containing G-protein coupled receptor 4       | Q9BXB1  | LGR4       | NA | Inverse variance weighted | 3  | 0.164  | 0.095 | 8.384E-02 | 0.904 | pan | Hospitalized COVID-19 |
| 12641_3   | ISP2                             | Type II inositol 1,4,5-trisphosphate 5-phosphatase                | P32019  | INPP5B     | NA | Inverse variance weighted | 2  | 0.081  | 0.047 | 8.391E-02 | 0.904 | pan | Hospitalized COVID-19 |
| 2611_72   | Dtk                              | Tyrosine-protein kinase receptor TYRO3                            | Q6Q418  | TYRO3      | NA | Inverse variance weighted | 2  | 0.176  | 0.102 | 8.404E-02 | 0.904 | pan | Hospitalized COVID-19 |
| 8035_6    | CA198                            | Uncharacterized protein C1orf198                                  | Q9H425  | C1orf198   | NA | Wald ratio                | 1  | 0.154  | 0.089 | 8.419E-02 | 0.904 | pan | Hospitalized COVID-19 |
| 12428_2   | LYPL1                            | Lysophospholipase-like protein 1                                  | Q5VWZ2  | LYPLA1     | NA | Wald ratio                | 1  | 0.172  | 0.100 | 8.432E-02 | 0.904 | pan | Hospitalized COVID-19 |
| 3600_2    | Chitotriosidase-1                | Chitotriosidase-1                                                 | Q13231  | CHIT1      | NA | Inverse variance weighted | 8  | 0.033  | 0.019 | 8.441E-02 | 0.904 | pan | Hospitalized COVID-19 |
| 15305_7   | Secretagogen                     | Secretagogen                                                      | O76038  | SCGN       | NA | Inverse variance weighted | 2  | 0.196  | 0.114 | 8.463E-02 | 0.904 | pan | Hospitalized COVID-19 |
| 6715_63   | PPB1                             | Alkaline phosphatase, placental-like                              | P10696  | ALPG       | NA | Inverse variance weighted | 3  | 0.153  | 0.089 | 8.668E-02 | 0.904 | pan | Hospitalized COVID-19 |
| 18295_102 | GRHRP                            | Glyoxylate reductase/hydroxypyruvate reductase                    | Q9UBQ7  | GRHRP      | NA | Inverse variance weighted | 3  | -0.063 | 0.037 | 8.669E-02 | 0.904 | pan | Hospitalized COVID-19 |
| 13961_18  | KIF3A                            | Kinesin-like protein KIF3A                                        | Q9Y496  | KIF3A      | NA | Wald ratio                | 1  | -0.342 | 0.200 | 8.724E-02 | 0.904 | pan | Hospitalized COVID-19 |
| 13724_27  | FGF-19                           | Fibroblast growth factor 19                                       | O95750  | FGF19      | NA | Inverse variance weighted | 2  | 0.201  | 0.117 | 8.726E-02 | 0.904 | pan | Hospitalized COVID-19 |
| 3168_8    | ADAMTS-5                         | A disintegrin and metalloproteinase with thrombospondin motifs 5  | Q9UNA0  | ADAMTS5    | NA | Inverse variance weighted | 4  | 0.049  | 0.029 | 8.732E-02 | 0.904 | pan | Hospitalized COVID-19 |
| 7638_30   | Lectin, mannose-binding 2        | Vesicular integral-membrane protein VIP36                         | Q12907  | LMAN2      | NA | Inverse variance weighted | 2  | 0.266  | 0.156 | 8.759E-02 | 0.904 | pan | Hospitalized COVID-19 |
| 9960_2    | TBCD5                            | TBC1 domain family member 5                                       | Q92609  | TBC1D5     | NA | Wald ratio                | 1  | -0.339 | 0.198 | 8.764E-02 | 0.904 | pan | Hospitalized COVID-19 |
| 13597_20  | RAB31                            | Ras-related protein Rab-31                                        | Q13636  | RAB31      | NA | Inverse variance weighted | 3  | 0.243  | 0.142 | 8.790E-02 | 0.904 | pan | Hospitalized COVID-19 |
| 11431_235 | RECQ1                            | ATP-dependent DNA helicase Q1                                     | P46063  | RECQ1      | NA | Inverse variance weighted | 10 | 0.035  | 0.020 | 8.846E-02 | 0.904 | pan | Hospitalized COVID-19 |
| 3331_8    | RGM8                             | RGM domain family member B                                        | Q6NW40  | RGM8       | NA | Wald ratio                | 1  | -0.371 | 0.218 | 8.868E-02 | 0.904 | pan | Hospitalized COVID-19 |
| 11207_3   | Macrophage scavenger receptor:CD | Macrophage scavenger receptor types I and II: Cytoplasmic domain  | P21757  | MSR1       | NA | Wald ratio                | 1  | 0.646  | 0.380 | 8.913E-02 | 0.904 | pan | Hospitalized COVID-19 |
| 5742_14   | PPA6                             | Lysophosphatidic acid phosphatase type 6                          | Q9NPH0  | ACP6       | NA | Inverse variance weighted | 22 | -0.028 | 0.016 | 8.934E-02 | 0.904 | pan | Hospitalized COVID-19 |
| 6367_66   | fibromodulin                     | fibromodulin                                                      | Q06828  | FMOD       | NA | Inverse variance weighted | 5  | 0.102  | 0.060 | 8.946E-02 | 0.904 | pan | Hospitalized COVID-19 |
| 14636_25  | Ribonuclease UK114               | Ribonuclease UK114                                                | P52758  | RIDA       | NA | Inverse variance weighted | 4  | -0.072 | 0.042 | 8.948E-02 | 0.904 | pan | Hospitalized COVID-19 |
| 4430_44   | Collectin Kidney 1               | Collectin-11                                                      | Q9BW98  | COLEC11    | NA | Inverse variance weighted | 11 | 0.088  | 0.052 | 9.004E-02 | 0.904 | pan | Hospitalized COVID-19 |
| 11542_11  | TM230                            | Transmembrane protein 230                                         | Q96A57  | TMEM230    | NA | Wald ratio                | 1  | -0.261 | 0.154 | 9.006E-02 | 0.904 | pan | Hospitalized COVID-19 |
| 10015_119 | KCAB2                            | Voltage-gated potassium channel subunit beta-2                    | Q13303  | KCNAB2     | NA | Inverse variance weighted | 2  | -0.226 | 0.134 | 9.063E-02 | 0.905 | pan | Hospitalized COVID-19 |
| 4568_17   | SLIK5                            | SLIT and NTRK-like protein 5                                      | Q94991  | SLITRK5    | NA | Inverse variance weighted | 4  | 0.107  | 0.063 | 9.100E-02 | 0.905 | pan | Hospitalized COVID-19 |
| 8989_40   | SCUB1                            | Signal peptide, CUB and EGF-like domain-containing protein 1      | Q8IWIY4 | SCUBE1     | NA | Inverse variance weighted | 6  | -0.092 | 0.054 | 9.148E-02 | 0.905 | pan | Hospitalized COVID-19 |
| 17377_1   | Aldose reductase-like C3         | Aldo-keto reductase family 1 member C3                            | P42330  | AKR1C3     | NA | Inverse variance weighted | 9  | -0.074 | 0.044 | 9.462E-02 | 0.917 | pan | Hospitalized COVID-19 |
| 11145_72  | K154L                            | UPF0606 protein KIAA1549L                                         | Q6ZVL6  | KIAA1549L  | NA | Inverse variance weighted | 7  | -0.050 | 0.030 | 9.500E-02 | 0.917 | pan | Hospitalized COVID-19 |
| 5879_51   | Dynactin subunit 2               | Dynactin subunit 2                                                | Q13561  | DCTN2      | NA | Wald ratio                | 1  | -0.322 | 0.193 | 9.573E-02 | 0.917 | pan | Hospitalized COVID-19 |
| 19173_5   | ZFAN1                            | AN1-type zinc finger protein 1                                    | Q8TCF1  | ZFAND1     | NA | Inverse variance weighted | 4  | 0.095  | 0.057 | 9.656E-02 | 0.917 | pan | Hospitalized COVID-19 |
| 3366_51   | ECM1                             | Extracellular matrix protein 1                                    | Q16610  | ECM1       | NA | Inverse variance weighted | 14 | -0.039 | 0.024 | 9.667E-02 | 0.917 | pan | Hospitalized COVID-19 |
| 19617_5   | LTB4DH                           | Prostaglandin reductase 1                                         | Q14914  | PTGR1      | NA | Inverse variance weighted | 12 | -0.035 | 0.021 | 9.677E-02 | 0.917 | pan | Hospitalized COVID-19 |
| 12449_16  | PIIH                             | Peptidyl-prolyl cis-trans isomerase H                             | O43447  | PIIH       | NA | Wald ratio                | 1  | -0.247 | 0.149 | 9.697E-02 | 0.917 | pan | Hospitalized COVID-19 |
| 15560_52  | Apo-TC II                        | Transcobalamin-2                                                  | P20062  | TCN2       | NA | Inverse variance weighted | 10 | 0.037  | 0.023 | 9.722E-02 | 0.917 | pan | Hospitalized COVID-19 |
| 15427_35  | LOXL3                            | Lysyl oxidase homolog 3                                           | P58215  | LOXL3      | NA | Inverse variance weighted | 11 | -0.043 | 0.026 | 9.730E-02 | 0.917 | pan | Hospitalized COVID-19 |
| 6904_14   | LRR72                            | Leucine-rich repeat transmembrane neuronal protein 2              | O43300  | LRR72      | NA | Inverse variance weighted | 3  | 0.135  | 0.082 | 9.812E-02 | 0.917 | pan | Hospitalized COVID-19 |
| 8310_6    | U773                             | Zymogen granule protein 16 homolog B                              | Q96DA0  | ZG16B      | NA | Wald ratio                | 1  | 0.107  | 0.065 | 9.836E-02 | 0.917 | pan | Hospitalized COVID-19 |
| 19223_6   | RAB1A                            | Ras-related protein Rab-1A                                        | P62820  | RAB1A      | NA | Inverse variance weighted | 2  | -0.256 | 0.155 | 9.876E-02 | 0.917 | pan | Hospitalized COVID-19 |
| 10621_26  | PRR16                            | Protein Largen                                                    | Q569H4  | PRR16      | NA | Inverse variance weighted | 4  | 0.181  | 0.110 | 9.913E-02 | 0.917 | pan | Hospitalized COVID-19 |
| 12630_8   | ARFP2                            | Arfaptin-2                                                        | P53365  | ARFIP2     | NA | Inverse variance weighted | 5  | -0.143 | 0.087 | 9.937E-02 | 0.917 | pan | Hospitalized COVID-19 |
| 3457_57   | Periostin                        | Periostin                                                         | Q15063  | POSTN      | NA | Inverse variance weighted | 4  | 0.072  | 0.044 | 9.989E-02 | 0.917 | pan | Hospitalized COVID-19 |
| 10772_21  | CGAT2                            | Chondroitin sulfate N-acetylgalactosaminyltransferase 2           | Q8N6G5  | CSGALNACT2 | NA | Wald ratio                | 1  | 0.177  | 0.107 | 9.996E-02 | 0.917 | pan | Hospitalized COVID-19 |
| 8275_31   | PEAR1:CD                         | Platelet endothelial aggregation receptor 1: Extracellular domain | Q5VY43  | PEAR1      | NA | Inverse variance weighted | 2  | -0.154 | 0.094 | 1.000E-01 | 0.917 | pan | Hospitalized COVID-19 |
| 19482_11  | HDHD3                            | Haloacid dehalogenase-like hydrolase domain-containing protein 3  | Q9BSH5  | HDHD3      | NA | Wald ratio                | 1  | 0.091  | 0.055 | 1.003E-01 | 0.917 | pan | Hospitalized COVID-19 |
| 6925_26   | SNX8                             | Sorting nexin-8                                                   | Q9Y5X2  | SNX8       | NA | Inverse variance weighted | 2  | 0.097  | 0.059 | 1.008E-01 | 0.917 | pan | Hospitalized COVID-19 |
| 5129_12   | SREC-1                           | Scavenger receptor class F member 1                               | Q14162  | SCARF1     | NA | Inverse variance weighted | 5  | 0.043  | 0.026 | 1.014E-01 | 0.917 | pan | Hospitalized COVID-19 |
| 19129_15  | MTHFSD                           | Methylenetetrahydrofolate synthase domain-containing protein      | Q2M296  | MTHFSD     | NA | Inverse variance weighted | 5  | -0.051 | 0.031 | 1.018E-01 | 0.917 | pan | Hospitalized COVID-19 |
| 11428_31  | PDLI1                            | PDZ and LIM domain protein 1                                      | O00151  | PDLIM1     | NA | Wald ratio                | 1  | -0.242 | 0.148 | 1.020E-01 | 0.917 | pan | Hospitalized COVID-19 |
| 12494_99  | GBRL2                            | Gamma-aminobutyric acid receptor-associated protein-like 2        | P60520  | GABARAPL2  | NA | Inverse variance weighted | 2  | 0.453  | 0.278 | 1.024E-01 | 0.917 | pan | Hospitalized COVID-19 |
| 16916_19  | SLIK6                            | SLIT and NTRK-like protein 6                                      | Q9HSY7  | SLITRK6    | NA | Inverse variance weighted | 6  | -0.079 | 0.049 | 1.033E-01 | 0.917 | pan | Hospitalized COVID-19 |

|           |                            |                                                                                             |        |           |    |                           |    |        |       |           |       |     |                       |
|-----------|----------------------------|---------------------------------------------------------------------------------------------|--------|-----------|----|---------------------------|----|--------|-------|-----------|-------|-----|-----------------------|
| 15364_101 | Apo C-I                    | Apolipoprotein C-I                                                                          | P02654 | APOC1     | NA | Inverse variance weighted | 2  | -0.364 | 0.223 | 1.035E-01 | 0.917 | pan | Hospitalized COVID-19 |
| 14294_61  | MBD1                       | Methyl-CpG-binding domain protein 1                                                         | Q9UI59 | MBD1      | NA | Inverse variance weighted | 3  | 0.201  | 0.123 | 1.037E-01 | 0.917 | pan | Hospitalized COVID-19 |
| 12616_45  | NRBP                       | Nuclear receptor-binding protein                                                            | Q9UHY1 | NRBP1     | NA | Wald ratio                | 1  | 0.135  | 0.083 | 1.041E-01 | 0.917 | pan | Hospitalized COVID-19 |
| 6039_24   | CRHBP                      | Corticotropin-releasing factor-binding protein                                              | P24387 | CRHBP     | NA | Inverse variance weighted | 8  | 0.037  | 0.023 | 1.057E-01 | 0.927 | pan | Hospitalized COVID-19 |
| 3024_18   | a2-Antiplasmin             | Alpha-2-antiplasmin                                                                         | P08697 | SERPINF2  | NA | Inverse variance weighted | 6  | 0.107  | 0.066 | 1.062E-01 | 0.928 | pan | Hospitalized COVID-19 |
| 17419_17  | TES                        | Testin                                                                                      | Q9UGI8 | TES       | NA | Wald ratio                | 1  | -0.219 | 0.135 | 1.066E-01 | 0.928 | pan | Hospitalized COVID-19 |
| 13422_66  | ENOX2                      | Ecto-NOX disulfide-thiol exchanger 2                                                        | Q16206 | ENOX2     | NA | Wald ratio                | 1  | 0.392  | 0.244 | 1.077E-01 | 0.934 | pan | Hospitalized COVID-19 |
| 12522_6   | RD23B                      | UV excision repair protein RAD23 homolog B                                                  | P54727 | RAD23B    | NA | Wald ratio                | 1  | 0.294  | 0.183 | 1.082E-01 | 0.934 | pan | Hospitalized COVID-19 |
| 7161_25   | G6PE                       | GDH/6PGL endoplasmic bifunctional protein                                                   | O95479 | H6PD      | NA | Inverse variance weighted | 19 | -0.034 | 0.021 | 1.091E-01 | 0.934 | pan | Hospitalized COVID-19 |
| 11352_42  | TITIN                      | Titin                                                                                       | Q8W242 | TTN       | NA | Wald ratio                | 1  | 0.373  | 0.233 | 1.093E-01 | 0.934 | pan | Hospitalized COVID-19 |
| 2742_68   | Siglec-7                   | Sialic acid-binding Ig-like lectin 7                                                        | Q9Y286 | SIGLEC7   | NA | Inverse variance weighted | 3  | 0.117  | 0.074 | 1.108E-01 | 0.934 | pan | Hospitalized COVID-19 |
| 12396_19  | HIBCH                      | 3-hydroxyisobutyryl-CoA hydrolase, mitochondrial                                            | Q6NVY1 | HIBCH     | NA | Inverse variance weighted | 6  | 0.045  | 0.028 | 1.114E-01 | 0.934 | pan | Hospitalized COVID-19 |
| 10521_10  | MXRA8:ECD                  | Matrix-remodeling-associated protein 8:Extracellular domain                                 | Q9BRK3 | MXRA8     | NA | Inverse variance weighted | 3  | -0.140 | 0.088 | 1.120E-01 | 0.934 | pan | Hospitalized COVID-19 |
| 17512_2   | NMI                        | N-myc-interactor                                                                            | Q13287 | NMI       | NA | Wald ratio                | 1  | 0.440  | 0.277 | 1.123E-01 | 0.934 | pan | Hospitalized COVID-19 |
| 11656_110 | EVL                        | Ena/VASP-like protein                                                                       | Q9UI08 | EVL       | NA | Inverse variance weighted | 3  | 0.181  | 0.114 | 1.126E-01 | 0.934 | pan | Hospitalized COVID-19 |
| 17756_69  | DCTD                       | Deoxycytidylate deaminase                                                                   | P32321 | DCTD      | NA | Inverse variance weighted | 2  | 0.184  | 0.116 | 1.127E-01 | 0.934 | pan | Hospitalized COVID-19 |
| 7779_86   | CHSTB                      | Carbohydrate sulfotransferase 11                                                            | Q9NPF2 | CHST11    | NA | Inverse variance weighted | 5  | 0.057  | 0.036 | 1.127E-01 | 0.934 | pan | Hospitalized COVID-19 |
| 8994_65   | SLAMF8                     | SLAM family member 8                                                                        | Q9POV8 | SLAMF8    | NA | Inverse variance weighted | 4  | 0.143  | 0.090 | 1.132E-01 | 0.934 | pan | Hospitalized COVID-19 |
| 12016_60  | CBL                        | E3 ubiquitin-protein ligase CBL                                                             | P22681 | CBL       | NA | Wald ratio                | 1  | 0.113  | 0.072 | 1.143E-01 | 0.934 | pan | Hospitalized COVID-19 |
| 4924_32   | MMP-1                      | Interstitial collagenase                                                                    | P03956 | MMP1      | NA | Inverse variance weighted | 12 | 0.045  | 0.028 | 1.148E-01 | 0.934 | pan | Hospitalized COVID-19 |
| 8982_65   | TSP3                       | Thrombospondin-3                                                                            | P49746 | THBS3     | NA | Inverse variance weighted | 4  | -0.171 | 0.109 | 1.153E-01 | 0.934 | pan | Hospitalized COVID-19 |
| 4157_2    | Thrombin                   | Thrombin                                                                                    | P00734 | F2        | NA | Inverse variance weighted | 5  | 0.096  | 0.061 | 1.160E-01 | 0.934 | pan | Hospitalized COVID-19 |
| 17672_184 | Gastric intrinsic factor   | Gastric intrinsic factor                                                                    | P27352 | CBLIF     | NA | Inverse variance weighted | 13 | -0.045 | 0.028 | 1.164E-01 | 0.934 | pan | Hospitalized COVID-19 |
| 17821_20  | NMT2                       | Glycylpeptide N-tetradecanoyltransferase 2                                                  | O60551 | NMT2      | NA | Wald ratio                | 1  | 0.253  | 0.161 | 1.165E-01 | 0.934 | pan | Hospitalized COVID-19 |
| 4978_54   | DBNL                       | Drebrin-like protein                                                                        | Q9UIJ6 | DBNL      | NA | Wald ratio                | 1  | 0.262  | 0.167 | 1.168E-01 | 0.934 | pan | Hospitalized COVID-19 |
| 10754_113 | Prokineticin-2             | Prokineticin-2                                                                              | Q9HC23 | PROK2     | NA | Inverse variance weighted | 9  | -0.048 | 0.031 | 1.178E-01 | 0.934 | pan | Hospitalized COVID-19 |
| 13460_4   | CHAD                       | Chondroadherin                                                                              | O15335 | CHAD      | NA | Inverse variance weighted | 2  | -0.197 | 0.126 | 1.181E-01 | 0.934 | pan | Hospitalized COVID-19 |
| 16919_1   | ACBP                       | Acyl-CoA-binding protein                                                                    | P07108 | DBI       | NA | Inverse variance weighted | 4  | 0.179  | 0.115 | 1.198E-01 | 0.934 | pan | Hospitalized COVID-19 |
| 18841_1   | SPB13                      | Serpin B13                                                                                  | Q9UIV8 | SERPINF13 | NA | Inverse variance weighted | 4  | 0.081  | 0.052 | 1.202E-01 | 0.934 | pan | Hospitalized COVID-19 |
| 9557_5    | MANS1                      | MANSC domain-containing protein 1                                                           | Q9H8J5 | MANSC1    | NA | Inverse variance weighted | 5  | 0.076  | 0.049 | 1.208E-01 | 0.934 | pan | Hospitalized COVID-19 |
| 9212_22   | CATF                       | Cathepsin F                                                                                 | Q9UBX1 | CTSF      | NA | Inverse variance weighted | 3  | 0.209  | 0.135 | 1.210E-01 | 0.934 | pan | Hospitalized COVID-19 |
| 4459_68   | PCSK7                      | Proprotein convertase subtilisin/kexin type 7                                               | Q16549 | PCSK7     | NA | Inverse variance weighted | 14 | -0.033 | 0.022 | 1.213E-01 | 0.934 | pan | Hospitalized COVID-19 |
| 4455_89   | MFGM                       | Lactadherin                                                                                 | Q08431 | MFG8      | NA | Inverse variance weighted | 4  | -0.012 | 0.008 | 1.215E-01 | 0.934 | pan | Hospitalized COVID-19 |
| 5599_88   | PCYLX                      | Prenylcysteine oxidase-like                                                                 | Q8NBM8 | PCYOX1L   | NA | Wald ratio                | 1  | -0.224 | 0.145 | 1.216E-01 | 0.934 | pan | Hospitalized COVID-19 |
| 16792_4   | Siglec-5                   | Sialic acid-binding Ig-like lectin 5                                                        | O15389 | SIGLEC5   | NA | Inverse variance weighted | 7  | 0.046  | 0.029 | 1.217E-01 | 0.934 | pan | Hospitalized COVID-19 |
| 18401_18  | ALKB3                      | Alpha-ketoglutarate-dependent dioxygenase alkB homolog 3                                    | Q96083 | ALKBH3    | NA | Inverse variance weighted | 6  | -0.064 | 0.041 | 1.219E-01 | 0.934 | pan | Hospitalized COVID-19 |
| 16828_8   | Collagen a1(VI)            | Collagen alpha-1(VI) chain                                                                  | P12109 | COL6A1    | NA | Inverse variance weighted | 14 | -0.033 | 0.021 | 1.220E-01 | 0.934 | pan | Hospitalized COVID-19 |
| 9126_171  | NT5D3                      | 5'-nucleotidase domain-containing protein 3                                                 | Q86UY8 | NT5DC3    | NA | Inverse variance weighted | 3  | 0.069  | 0.044 | 1.223E-01 | 0.934 | pan | Hospitalized COVID-19 |
| 12968_2   | CSR2                       | Cysteine and glycine-rich protein 2                                                         | Q16527 | CSR2      | NA | Wald ratio                | 1  | 0.303  | 0.197 | 1.234E-01 | 0.934 | pan | Hospitalized COVID-19 |
| 9314_9    | PSG5                       | Pregnancy-specific beta-1-glycoprotein 5                                                    | Q15238 | PSG5      | NA | Inverse variance weighted | 4  | 0.153  | 0.099 | 1.236E-01 | 0.934 | pan | Hospitalized COVID-19 |
| 8903_1    | COX6C                      | Cytochrome c oxidase subunit 6C                                                             | P09669 | COX6C     | NA | Inverse variance weighted | 4  | 0.151  | 0.098 | 1.245E-01 | 0.934 | pan | Hospitalized COVID-19 |
| 19334_62  | TXD12                      | Thioredoxin domain-containing protein 12                                                    | O95881 | TXNDC12   | NA | Wald ratio                | 1  | 0.191  | 0.124 | 1.246E-01 | 0.934 | pan | Hospitalized COVID-19 |
| 5481_16   | RASA1                      | Ras GTPase-activating protein 1                                                             | P20936 | RASA1     | NA | Inverse variance weighted | 2  | -0.247 | 0.161 | 1.259E-01 | 0.934 | pan | Hospitalized COVID-19 |
| 13610_9   | MAGE-10                    | Melanoma-associated antigen 10                                                              | P43363 | MAGEA10   | NA | Inverse variance weighted | 2  | -0.238 | 0.156 | 1.270E-01 | 0.934 | pan | Hospitalized COVID-19 |
| 6373_54   | DLK1                       | Protein delta homolog 1                                                                     | P80370 | DLK1      | NA | Inverse variance weighted | 3  | -0.228 | 0.150 | 1.276E-01 | 0.934 | pan | Hospitalized COVID-19 |
| 19237_17  | D-dopachrome decarboxylase | D-dopachrome decarboxylase                                                                  | P30046 | DDT       | NA | Inverse variance weighted | 9  | -0.099 | 0.065 | 1.277E-01 | 0.934 | pan | Hospitalized COVID-19 |
| 4249_64   | NDP kinase B               | Nucleoside diphosphate kinase B                                                             | P22392 | NME2      | NA | Wald ratio                | 1  | 0.115  | 0.075 | 1.278E-01 | 0.934 | pan | Hospitalized COVID-19 |
| 8074_32   | TMM70                      | Transmembrane protein 70, mitochondrial                                                     | Q9BU87 | TMEM70    | NA | Inverse variance weighted | 3  | 0.179  | 0.118 | 1.284E-01 | 0.934 | pan | Hospitalized COVID-19 |
| 19293_6   | VP26A                      | Vacuolar protein sorting-associated protein 26A                                             | O75436 | VP526A    | NA | Inverse variance weighted | 3  | -0.102 | 0.067 | 1.286E-01 | 0.934 | pan | Hospitalized COVID-19 |
| 11540_37  | FOXO3A                     | Forkhead box protein O3                                                                     | O43524 | FOXO3     | NA | Wald ratio                | 1  | -0.308 | 0.203 | 1.287E-01 | 0.934 | pan | Hospitalized COVID-19 |
| 8840_61   | C1s                        | Complement C1s subcomponent                                                                 | P09871 | C1S       | NA | Inverse variance weighted | 3  | 0.168  | 0.111 | 1.294E-01 | 0.934 | pan | Hospitalized COVID-19 |
| 13388_57  | NEC1                       | Neuroendocrine convertase 1                                                                 | P29120 | PCSK1     | NA | Inverse variance weighted | 11 | 0.046  | 0.030 | 1.295E-01 | 0.934 | pan | Hospitalized COVID-19 |
| 12820_1   | GRAP                       | GRB2-related adapter protein                                                                | Q13588 | GRAP      | NA | Inverse variance weighted | 2  | -0.220 | 0.145 | 1.302E-01 | 0.934 | pan | Hospitalized COVID-19 |
| 2567_5    | Factor I                   | Complement factor I                                                                         | P05156 | CFI       | NA | Inverse variance weighted | 2  | 0.097  | 0.064 | 1.303E-01 | 0.934 | pan | Hospitalized COVID-19 |
| 9288_7    | FKBP7                      | Peptidyl-prolyl cis-trans isomerase FKBP7                                                   | Q9Y680 | FKBP7     | NA | Inverse variance weighted | 7  | 0.047  | 0.031 | 1.310E-01 | 0.934 | pan | Hospitalized COVID-19 |
| 12713_365 | RGS19                      | Regulator of G-protein signaling 19                                                         | P49795 | RGS19     | NA | Wald ratio                | 1  | 0.312  | 0.207 | 1.316E-01 | 0.934 | pan | Hospitalized COVID-19 |
| 5090_49   | ILT-2                      | Leukocyte immunoglobulin-like receptor subfamily B member 1                                 | Q8NHL6 | LILRB1    | NA | Inverse variance weighted | 10 | -0.048 | 0.032 | 1.317E-01 | 0.934 | pan | Hospitalized COVID-19 |
| 17398_55  | HO-1                       | Heme oxygenase 1                                                                            | P09601 | HMOX1     | NA | Inverse variance weighted | 9  | -0.078 | 0.052 | 1.330E-01 | 0.934 | pan | Hospitalized COVID-19 |
| 5900_11   | HINT1                      | Histidine triad nucleotide-binding protein 1                                                | P49773 | HINT1     | NA | Wald ratio                | 1  | 0.216  | 0.144 | 1.331E-01 | 0.934 | pan | Hospitalized COVID-19 |
| 5400_52   | sLeptin R                  | Leptin receptor, soluble                                                                    | P48357 | LEPR      | NA | Inverse variance weighted | 18 | 0.029  | 0.019 | 1.334E-01 | 0.934 | pan | Hospitalized COVID-19 |
| 2860_19   | Karyopherin-a2             | Importin subunit alpha-1                                                                    | P52292 | KPNA2     | NA | Inverse variance weighted | 10 | -0.097 | 0.065 | 1.342E-01 | 0.934 | pan | Hospitalized COVID-19 |
| 9478_69   | KPRA                       | Phosphoribosyl pyrophosphate synthase-associated protein 1                                  | Q14558 | PRPSAP1   | NA | Wald ratio                | 1  | -0.232 | 0.155 | 1.344E-01 | 0.934 | pan | Hospitalized COVID-19 |
| 9834_62   | ADH1B                      | Alcohol dehydrogenase 1B                                                                    | P00325 | ADH1B     | NA | Wald ratio                | 1  | 0.136  | 0.091 | 1.349E-01 | 0.934 | pan | Hospitalized COVID-19 |
| 8971_9    | NRX1A                      | Neurexin-1                                                                                  | Q9ULB1 | NRXN1     | NA | Inverse variance weighted | 6  | -0.126 | 0.084 | 1.351E-01 | 0.934 | pan | Hospitalized COVID-19 |
| 10490_3   | RPN1:CD                    | Dolichyl-diphosphooligosaccharide--protein glycosyltransferase subunit 1:Cytoplasmic domain | P04843 | RPN1      | NA | Wald ratio                | 1  | -0.115 | 0.077 | 1.355E-01 | 0.934 | pan | Hospitalized COVID-19 |
| 9341_1    | PDGFD                      | Platelet-derived growth factor D                                                            | Q9G2P0 | PDGFD     | NA | Inverse variance weighted | 3  | -0.166 | 0.112 | 1.368E-01 | 0.934 | pan | Hospitalized COVID-19 |
| 13113_7   | Osteopontin                | Osteopontin                                                                                 | P10451 | SPPI      | NA | Inverse variance weighted | 5  | 0.083  | 0.056 | 1.369E-01 | 0.934 | pan | Hospitalized COVID-19 |
| 3028_36   | Ck-b-8-1                   | Ck-beta-8-1                                                                                 | P55773 | CCL23     | NA | Inverse variance weighted | 3  | -0.153 | 0.103 | 1.371E-01 | 0.934 | pan | Hospitalized COVID-19 |
| 15607_56  | KPYR                       | Pyruvate kinase PKLR                                                                        | P30613 | PKLR      | NA | Inverse variance weighted | 3  | -0.198 | 0.134 | 1.375E-01 | 0.934 | pan | Hospitalized COVID-19 |
| 19187_21  | STABP                      | STAM-binding protein                                                                        | O95630 | STAMBP    | NA | Inverse variance weighted | 2  | 0.211  | 0.142 | 1.380E-01 | 0.934 | pan | Hospitalized COVID-19 |
| 3035_80   | IL-19                      | Interleukin-19                                                                              | Q9UHD0 | IL19      | NA | Inverse variance weighted | 5  | -0.104 | 0.070 | 1.380E-01 | 0.934 | pan | Hospitalized COVID-19 |
| 17820_170 | MLF1                       | Myeloid leukemia factor 1                                                                   | P58340 | MLF1      | NA | Inverse variance weighted | 4  | -0.185 | 0.125 | 1.389E-01 | 0.934 | pan | Hospitalized COVID-19 |
| 3323_37   | LRP8                       | Low-density lipoprotein receptor-related protein 8                                          | Q14114 | LRP8      | NA | Inverse variance weighted | 4  | 0.088  | 0.060 | 1.389E-01 | 0.934 | pan | Hospitalized COVID-19 |
| 11825_27  | PRGC1                      | Peroxisome proliferator-activated receptor gamma coactivator 1-alpha                        | Q9UBK2 | PPARGC1A  | NA | Wald ratio                | 1  | 0.323  | 0.218 | 1.390E-01 | 0.934 | pan | Hospitalized COVID-19 |
| 3206_4    | LYVE1                      | Lymphatic vessel endothelial hyalurononic acid receptor 1                                   | Q9Y5Y7 | LYVE1     | NA | Inverse variance weighted | 21 | 0.058  | 0.039 | 1.391E-01 | 0.934 | pan | Hospitalized COVID-19 |
| 9867_23   | F16P2                      | Fructose-1,6-bisphosphatase isozyme 2                                                       | O00757 | FBP2      | NA | Wald ratio                | 1  | 0.177  | 0.120 | 1.392E-01 | 0.934 | pan | Hospitalized COVID-19 |
| 18337_4   | GMD5                       | GDP-mannose 4,6 dehydratase                                                                 | O60547 | GMD5      | NA | Wald ratio                | 1  | -0.292 | 0.198 | 1.393E-01 | 0.934 | pan | Hospitalized COVID-19 |
| 2750_3    | Apo A-I                    | Apolipoprotein A-I                                                                          | P02647 | APOA1     | NA | Inverse variance weighted | 8  | -0.065 | 0.044 | 1.393E-01 | 0.934 | pan | Hospitalized COVID-19 |

|           |                            |                                                                                |        |          |    |                           |    |        |       |           |       |     |                       |
|-----------|----------------------------|--------------------------------------------------------------------------------|--------|----------|----|---------------------------|----|--------|-------|-----------|-------|-----|-----------------------|
| 14007_22  | PAPS1                      | Bifunctional 3'-phosphoadenosine 5'-phosphosulfate synthase 1                  | O43252 | PAPS51   | NA | Inverse variance weighted | 2  | -0.097 | 0.065 | 1.394E-01 | 0.934 | pan | Hospitalized COVID-19 |
| 15363_32  | Apo A-V                    | Apolipoprotein A-V                                                             | Q6Q788 | APOA5    | NA | Inverse variance weighted | 11 | 0.052  | 0.035 | 1.395E-01 | 0.934 | pan | Hospitalized COVID-19 |
| 17675_17  | ACO13                      | Acyl-coenzyme A thioesterase 13                                                | Q9NPJ3 | ACOT13   | NA | Wald ratio                | 1  | 0.312  | 0.211 | 1.399E-01 | 0.934 | pan | Hospitalized COVID-19 |
| 12558_3   | UBS3B                      | Ubiquitin-associated and SH3 domain-containing protein 8                       | Q8TF42 | UBASH3B  | NA | Inverse variance weighted | 2  | -0.110 | 0.075 | 1.406E-01 | 0.934 | pan | Hospitalized COVID-19 |
| 3045_72   | PTN                        | Pleiotrophin                                                                   | P21246 | PTN      | NA | Inverse variance weighted | 4  | -0.072 | 0.049 | 1.410E-01 | 0.934 | pan | Hospitalized COVID-19 |
| 15511_37  | NPTXR                      | Neuronal pentraxin receptor                                                    | Q95502 | NPTXR    | NA | Inverse variance weighted | 10 | -0.032 | 0.022 | 1.415E-01 | 0.934 | pan | Hospitalized COVID-19 |
| 3391_10   | PK3CG                      | Phosphatidylinositol 4,5-bisphosphate 3-kinase catalytic subunit gamma isoform | P48736 | PIK3CG   | NA | Wald ratio                | 1  | -0.354 | 0.241 | 1.415E-01 | 0.934 | pan | Hospitalized COVID-19 |
| 7178_59   | DEPP                       | Protein DEPP                                                                   | Q9NTK1 | DEPP1    | NA | Inverse variance weighted | 6  | -0.085 | 0.058 | 1.415E-01 | 0.934 | pan | Hospitalized COVID-19 |
| 10053_5   | ILK1                       | Integrin-linked protein kinase                                                 | Q13418 | ILK      | NA | Wald ratio                | 1  | 0.269  | 0.183 | 1.428E-01 | 0.936 | pan | Hospitalized COVID-19 |
| 12498_12  | TX1B3                      | Tax1-binding protein 3                                                         | O14907 | TAX1BP3  | NA | Wald ratio                | 1  | 0.169  | 0.116 | 1.429E-01 | 0.936 | pan | Hospitalized COVID-19 |
| 7921_65   | FIX1                       | Four-jointed box protein 1                                                     | Q86VR8 | FIX1     | NA | Inverse variance weighted | 4  | 0.060  | 0.041 | 1.432E-01 | 0.936 | pan | Hospitalized COVID-19 |
| 5636_10   | MFAP4                      | Microfibril-associated glycoprotein 4                                          | P55083 | MFAP4    | NA | Inverse variance weighted | 11 | 0.067  | 0.046 | 1.441E-01 | 0.937 | pan | Hospitalized COVID-19 |
| 17148_7   | BLVRB                      | Flavin reductase (NADPH)                                                       | P30043 | BLVRB    | NA | Inverse variance weighted | 2  | -0.132 | 0.090 | 1.442E-01 | 0.937 | pan | Hospitalized COVID-19 |
| 15470_11  | Hexosaminidase B           | Beta-hexosaminidase subunit beta                                               | P07686 | HEXB     | NA | Inverse variance weighted | 12 | 0.051  | 0.035 | 1.448E-01 | 0.937 | pan | Hospitalized COVID-19 |
| 15394_79  | UNC5B                      | Netrin receptor UNC5B                                                          | Q8I2J1 | UNC5B    | NA | Inverse variance weighted | 4  | 0.104  | 0.071 | 1.456E-01 | 0.937 | pan | Hospitalized COVID-19 |
| 11601_26  | DHX8                       | ATP-dependent RNA helicase DHX8                                                | Q14562 | DHX8     | NA | Inverse variance weighted | 4  | 0.117  | 0.080 | 1.459E-01 | 0.937 | pan | Hospitalized COVID-19 |
| 8447_11   | ghrelin                    | Appetite-regulating hormone                                                    | Q9UBU3 | GHRL     | NA | Inverse variance weighted | 2  | -0.217 | 0.149 | 1.460E-01 | 0.937 | pan | Hospitalized COVID-19 |
| 7211_2    | RNase 1                    | Ribonuclease pancreatic                                                        | P07998 | RNASE1   | NA | Inverse variance weighted | 6  | -0.100 | 0.069 | 1.467E-01 | 0.937 | pan | Hospitalized COVID-19 |
| 11277_23  | ATF6A                      | Cyclic AMP-dependent transcription factor ATF-6 alpha                          | P18850 | ATF6     | NA | Inverse variance weighted | 10 | -0.081 | 0.056 | 1.470E-01 | 0.937 | pan | Hospitalized COVID-19 |
| 16558_2   | MYOC                       | Myocilin                                                                       | Q99972 | MYOC     | NA | Inverse variance weighted | 9  | 0.041  | 0.028 | 1.481E-01 | 0.937 | pan | Hospitalized COVID-19 |
| 9451_20   | Uromodulin                 | Uromodulin                                                                     | P07911 | UMOD     | NA | Wald ratio                | 1  | -0.387 | 0.268 | 1.488E-01 | 0.937 | pan | Hospitalized COVID-19 |
| 8993_151  | RIPK2                      | Receptor-interacting serine/threonine-protein kinase 2                         | O43353 | RIPK2    | NA | Wald ratio                | 1  | -0.246 | 0.171 | 1.492E-01 | 0.937 | pan | Hospitalized COVID-19 |
| 19601_15  | ASB9                       | Ankyrin repeat and SOCS box protein 9                                          | Q96D05 | ASB9     | NA | Wald ratio                | 1  | -0.086 | 0.060 | 1.493E-01 | 0.937 | pan | Hospitalized COVID-19 |
| 3340_53   | TSF4                       | Thrombospondin-4                                                               | P35443 | THBS4    | NA | Inverse variance weighted | 4  | -0.065 | 0.045 | 1.494E-01 | 0.937 | pan | Hospitalized COVID-19 |
| 3807_1    | FGF23                      | Fibroblast growth factor 23                                                    | Q9GZV9 | FGF23    | NA | Wald ratio                | 1  | -0.286 | 0.198 | 1.494E-01 | 0.937 | pan | Hospitalized COVID-19 |
| 6629_3    | HBD-1                      | Beta-defensin 1                                                                | P60022 | DEFB1    | NA | Inverse variance weighted | 10 | -0.040 | 0.028 | 1.502E-01 | 0.939 | pan | Hospitalized COVID-19 |
| 7769_29   | 3BP2                       | SH3 domain-binding protein 2                                                   | P78314 | SH3BP2   | NA | Inverse variance weighted | 2  | 0.097  | 0.068 | 1.513E-01 | 0.941 | pan | Hospitalized COVID-19 |
| 5601_2    | PGRP-L                     | N-acetylmuramoyl-L-alanine amidase                                             | Q96PD5 | PGLYRP2  | NA | Inverse variance weighted | 6  | -0.074 | 0.051 | 1.521E-01 | 0.941 | pan | Hospitalized COVID-19 |
| 16593_3   | FADD                       | FAS-associated death domain protein                                            | Q13158 | FADD     | NA | Inverse variance weighted | 2  | -0.260 | 0.181 | 1.521E-01 | 0.941 | pan | Hospitalized COVID-19 |
| 6538_90   | K2013                      | Uncharacterized protein KIAA2013                                               | Q8IYS2 | KIAA2013 | NA | Inverse variance weighted | 2  | 0.215  | 0.150 | 1.522E-01 | 0.941 | pan | Hospitalized COVID-19 |
| 5078_82   | EphB6                      | Ephrin type-B receptor 6                                                       | O15197 | EPHB6    | NA | Inverse variance weighted | 4  | 0.066  | 0.046 | 1.527E-01 | 0.941 | pan | Hospitalized COVID-19 |
| 8269_327  | ARSK                       | Arylsulfatase K                                                                | Q6UWY0 | ARSK     | NA | Inverse variance weighted | 2  | 0.166  | 0.116 | 1.530E-01 | 0.941 | pan | Hospitalized COVID-19 |
| 4913_78   | HCC-4                      | C-C motif chemokine 16                                                         | O15467 | CCL16    | NA | Inverse variance weighted | 8  | 0.093  | 0.066 | 1.548E-01 | 0.945 | pan | Hospitalized COVID-19 |
| 13393_46  | DERL1                      | Derlin-1                                                                       | Q9BU08 | DERL1    | NA | Wald ratio                | 1  | 0.316  | 0.222 | 1.548E-01 | 0.945 | pan | Hospitalized COVID-19 |
| 13954_9   | GNAT1                      | Glucosamine 6-phosphate N-acetyltransferase                                    | Q96EK6 | GNPNAT1  | NA | Wald ratio                | 1  | -0.255 | 0.180 | 1.556E-01 | 0.945 | pan | Hospitalized COVID-19 |
| 2700_56   | Protein S                  | Vitamin K-dependent protein S                                                  | P07225 | PROS1    | NA | Inverse variance weighted | 2  | -0.208 | 0.147 | 1.566E-01 | 0.945 | pan | Hospitalized COVID-19 |
| 15635_4   | SMOC2                      | SPARC-related modular calcium-binding protein 2                                | Q9H3U7 | SMOC2    | NA | Inverse variance weighted | 6  | -0.046 | 0.033 | 1.568E-01 | 0.945 | pan | Hospitalized COVID-19 |
| 13107_9   | LYPD3                      | Ly6/PLAUR domain-containing protein 3                                          | Q95274 | LYPD3    | NA | Inverse variance weighted | 3  | -0.143 | 0.101 | 1.568E-01 | 0.945 | pan | Hospitalized COVID-19 |
| 17329_2   | BDH2                       | 3-hydroxybutyrate dehydrogenase type 2                                         | Q9BU11 | BDH2     | NA | Inverse variance weighted | 2  | 0.088  | 0.062 | 1.572E-01 | 0.945 | pan | Hospitalized COVID-19 |
| 15298_199 | NETO1                      | Neuropilin and tolloid-like protein 1                                          | Q8TDF5 | NETO1    | NA | Inverse variance weighted | 2  | -0.210 | 0.148 | 1.573E-01 | 0.945 | pan | Hospitalized COVID-19 |
| 4775_34   | Gelsolin                   | Gelsolin                                                                       | P06396 | GSN      | NA | Inverse variance weighted | 3  | -0.146 | 0.103 | 1.575E-01 | 0.945 | pan | Hospitalized COVID-19 |
| 9026_40   | BTNL8                      | Butyrophilin-like protein 8                                                    | Q6UX41 | BTNL8    | NA | Inverse variance weighted | 2  | -0.090 | 0.064 | 1.586E-01 | 0.945 | pan | Hospitalized COVID-19 |
| 6895_1    | TR:CD                      | Transferrin receptor protein 1: Cytoplasmic domain                             | P02786 | TRFC     | NA | Inverse variance weighted | 3  | 0.120  | 0.085 | 1.586E-01 | 0.945 | pan | Hospitalized COVID-19 |
| 2752_62   | BMP-14                     | Growth/differentiation factor 5                                                | P43026 | GDF5     | NA | Inverse variance weighted | 2  | 0.155  | 0.110 | 1.592E-01 | 0.945 | pan | Hospitalized COVID-19 |
| 17156_72  | DCAK1                      | Serine/threonine-protein kinase DCLK1                                          | O15075 | DCLK1    | NA | Inverse variance weighted | 6  | 0.062  | 0.044 | 1.593E-01 | 0.945 | pan | Hospitalized COVID-19 |
| 17735_130 | GBRAP                      | Gamma-aminobutyric acid receptor-associated protein                            | Q95166 | GABARAP  | NA | Wald ratio                | 1  | 0.292  | 0.208 | 1.605E-01 | 0.950 | pan | Hospitalized COVID-19 |
| 18285_6   | SVIP                       | Small VCP/p97-interacting protein                                              | Q8NHG7 | SVIP     | NA | Inverse variance weighted | 2  | 0.279  | 0.199 | 1.616E-01 | 0.950 | pan | Hospitalized COVID-19 |
| 2991_9    | IL-1 sRI                   | Interleukin-1 receptor type 1                                                  | P14778 | IL1R1    | NA | Inverse variance weighted | 8  | -0.074 | 0.053 | 1.618E-01 | 0.950 | pan | Hospitalized COVID-19 |
| 2631_50   | IL-10 Rb                   | Interleukin-10 receptor subunit beta                                           | Q08334 | IL10RB   | NA | Wald ratio                | 1  | 0.232  | 0.166 | 1.619E-01 | 0.950 | pan | Hospitalized COVID-19 |
| 8759_29   | a1,4-Galactosyltransferase | Lactosylceramide 4-alpha-galactosyltransferase                                 | Q9NPF4 | AAGALT   | NA | Inverse variance weighted | 16 | 0.033  | 0.024 | 1.628E-01 | 0.953 | pan | Hospitalized COVID-19 |
| 4989_7    | Fibrinogen g-chain dimer   | Fibrinogen gamma chain                                                         | P02679 | FGG      | NA | Wald ratio                | 1  | 0.238  | 0.171 | 1.634E-01 | 0.953 | pan | Hospitalized COVID-19 |
| 5722_78   | Prolylcarboxypeptidase     | Lysosomal Pro-X carboxypeptidase                                               | P42785 | PRCP     | NA | Inverse variance weighted | 8  | 0.072  | 0.052 | 1.638E-01 | 0.953 | pan | Hospitalized COVID-19 |
| 13682_47  | M-CSF R                    | Macrophage colony-stimulating factor 1 receptor                                | P07333 | CSF1R    | NA | Inverse variance weighted | 5  | -0.128 | 0.092 | 1.653E-01 | 0.955 | pan | Hospitalized COVID-19 |
| 17682_1   | CD46                       | Membrane cofactor protein                                                      | P15529 | CD46     | NA | Inverse variance weighted | 3  | 0.076  | 0.055 | 1.654E-01 | 0.955 | pan | Hospitalized COVID-19 |
| 13101_60  | SOST                       | Sclerostin                                                                     | Q9BQ84 | SOST     | NA | Inverse variance weighted | 3  | 0.129  | 0.094 | 1.677E-01 | 0.955 | pan | Hospitalized COVID-19 |
| 9215_117  | UBP25                      | Ubiquitin carboxyl-terminal hydrolase 25                                       | Q9UHP3 | USP25    | NA | Wald ratio                | 1  | -0.471 | 0.342 | 1.683E-01 | 0.955 | pan | Hospitalized COVID-19 |
| 2974_61   | contactin-1                | Contactin-1                                                                    | Q12860 | CNTN1    | NA | Inverse variance weighted | 7  | -0.050 | 0.036 | 1.686E-01 | 0.955 | pan | Hospitalized COVID-19 |
| 17364_8   | RU28                       | U2 small nuclear ribonucleoprotein Mcl-1                                       | P08579 | SNRBP2   | NA | Wald ratio                | 1  | -0.377 | 0.274 | 1.690E-01 | 0.955 | pan | Hospitalized COVID-19 |
| 10396_6   | Mcl-1                      | Induced myeloid leukemia cell differentiation protein Mcl-1                    | Q07820 | MCL1     | NA | Inverse variance weighted | 2  | -0.218 | 0.159 | 1.695E-01 | 0.955 | pan | Hospitalized COVID-19 |
| 13590_1   | ORN                        | Oligoribonuclease, mitochondrial                                               | Q9Y388 | REXO2    | NA | Inverse variance weighted | 2  | -0.157 | 0.114 | 1.696E-01 | 0.955 | pan | Hospitalized COVID-19 |
| 18301_10  | NAIF1                      | Nuclear apoptosis-inducing factor 1                                            | Q69Y17 | NAIF1    | NA | Inverse variance weighted | 3  | -0.139 | 0.101 | 1.697E-01 | 0.955 | pan | Hospitalized COVID-19 |
| 14150_7   | IL-1f6                     | Interleukin-36 alpha                                                           | Q9UHA7 | IL36A    | NA | Inverse variance weighted | 2  | -0.188 | 0.137 | 1.705E-01 | 0.955 | pan | Hospitalized COVID-19 |
| 11360_39  | RRM1                       | Ribonucleoside-diphosphate reductase large subunit                             | P23921 | RRM1     | NA | Inverse variance weighted | 16 | -0.053 | 0.039 | 1.706E-01 | 0.955 | pan | Hospitalized COVID-19 |
| 4906_35   | Coagulation Factor V       | Coagulation Factor V                                                           | P12259 | F5       | NA | Inverse variance weighted | 3  | -0.167 | 0.122 | 1.707E-01 | 0.955 | pan | Hospitalized COVID-19 |
| 9995_6    | DUT                        | Deoxyuridine 5'-triphosphate nucleotidohydrolase, mitochondrial                | P33316 | DUT      | NA | Wald ratio                | 1  | 0.224  | 0.164 | 1.707E-01 | 0.955 | pan | Hospitalized COVID-19 |
| 5404_53   | DR6                        | Tumor necrosis factor receptor superfamily member 21                           | O75509 | TNFRSF21 | NA | Inverse variance weighted | 2  | -0.137 | 0.100 | 1.717E-01 | 0.955 | pan | Hospitalized COVID-19 |
| 8459_10   | BMP-6                      | Bone morphogenetic protein 6                                                   | P22004 | BMP6     | NA | Inverse variance weighted | 3  | -0.133 | 0.098 | 1.725E-01 | 0.955 | pan | Hospitalized COVID-19 |
| 17514_48  | RAB21                      | Ras-related protein Rab-21                                                     | Q9UI25 | RAB21    | NA | Wald ratio                | 1  | -0.155 | 0.114 | 1.729E-01 | 0.955 | pan | Hospitalized COVID-19 |
| 12687_2   | DECR                       | 2,4-dienoyl-CoA reductase, mitochondrial                                       | Q16698 | DECR1    | NA | Inverse variance weighted | 6  | -0.116 | 0.085 | 1.733E-01 | 0.955 | pan | Hospitalized COVID-19 |
| 5202_4    | PPID                       | Peptidyl-prolyl cis-trans isomerase D                                          | Q08752 | PPID     | NA | Inverse variance weighted | 5  | -0.051 | 0.037 | 1.737E-01 | 0.955 | pan | Hospitalized COVID-19 |
| 17739_1   | HCDB                       | Hydroxyacyl-coenzyme A dehydrogenase, mitochondrial                            | Q16836 | HADH     | NA | Wald ratio                | 1  | -0.200 | 0.147 | 1.737E-01 | 0.955 | pan | Hospitalized COVID-19 |
| 4588_1    | PH                         | Pancreatic hormone                                                             | P01298 | PPY      | NA | Inverse variance weighted | 9  | -0.066 | 0.048 | 1.742E-01 | 0.955 | pan | Hospitalized COVID-19 |
| 5728_60   | FCRL1                      | Fc receptor-like protein 1                                                     | Q96LA6 | FCRL1    | NA | Inverse variance weighted | 10 | -0.067 | 0.049 | 1.745E-01 | 0.955 | pan | Hospitalized COVID-19 |
| 17832_12  | IDI2                       | Isopentenyl-diphosphate delta-isomerase 2                                      | Q9BX51 | IDI2     | NA | Inverse variance weighted | 2  | 0.089  | 0.066 | 1.747E-01 | 0.955 | pan | Hospitalized COVID-19 |
| 15383_200 | Endothelin 3               | Endothelin-3                                                                   | P14138 | EDN3     | NA | Wald ratio                | 1  | -0.335 | 0.247 | 1.751E-01 | 0.955 | pan | Hospitalized COVID-19 |
| 8014_359  | MANEA                      | Glycoprotein endo-alpha-1,2-mannosidase                                        | Q5SR19 | MANEA    | NA | Inverse variance weighted | 19 | -0.021 | 0.015 | 1.752E-01 | 0.955 | pan | Hospitalized COVID-19 |
| 3169_70   | IDUA                       | Alpha-L-iduronidase                                                            | P35475 | IDUA     | NA | Inverse variance weighted | 6  | 0.039  | 0.029 | 1.755E-01 | 0.955 | pan | Hospitalized COVID-19 |
| 4324_33   | CYT1                       | Cystatin-SA                                                                    | P09228 | CST2     | NA | Inverse variance weighted | 9  | 0.074  | 0.055 | 1.759E-01 | 0.955 | pan | Hospitalized COVID-19 |

|           |                                   |                                                                    |        |           |    |                           |    |        |       |           |       |     |                       |
|-----------|-----------------------------------|--------------------------------------------------------------------|--------|-----------|----|---------------------------|----|--------|-------|-----------|-------|-----|-----------------------|
| 2994_71   | IL-1Rrp2                          | Interleukin-1 receptor-like 2                                      | Q9HB29 | IL1RL2    | NA | Wald ratio                | 1  | -0.098 | 0.072 | 1.767E-01 | 0.955 | pan | Hospitalized COVID-19 |
| 11481_25  | TIMD3                             | Hepatitis A virus cellular receptor 2                              | Q8TDQ0 | HAVCR2    | NA | Wald ratio                | 1  | 0.323  | 0.239 | 1.768E-01 | 0.955 | pan | Hospitalized COVID-19 |
| 5107_7    | Notch 1                           | Neurogenic locus notch homolog protein 1                           | P46531 | NOTCH1    | NA | Inverse variance weighted | 3  | 0.123  | 0.091 | 1.770E-01 | 0.955 | pan | Hospitalized COVID-19 |
| 18162_167 | IRAK4                             | Interleukin-1 receptor-associated kinase 4                         | Q9NWZ3 | IRAK4     | NA | Wald ratio                | 1  | -0.173 | 0.129 | 1.781E-01 | 0.955 | pan | Hospitalized COVID-19 |
| 4141_79   | IP-10                             | C-X-C motif chemokine 10                                           | P02778 | CXCL10    | NA | Inverse variance weighted | 2  | 0.218  | 0.162 | 1.781E-01 | 0.955 | pan | Hospitalized COVID-19 |
| 14090_23  | DEFB6                             | Differentially expressed in FDCP 6 homolog                         | Q9H4E7 | DEFB6     | NA | Inverse variance weighted | 2  | -0.145 | 0.108 | 1.783E-01 | 0.955 | pan | Hospitalized COVID-19 |
| 17698_15  | WBP2                              | VW domain-binding protein 2                                        | Q96979 | WBP2      | NA | Wald ratio                | 1  | 0.358  | 0.266 | 1.785E-01 | 0.955 | pan | Hospitalized COVID-19 |
| 3316_58   | Heparin cofactor II               | Heparin cofactor 2                                                 | P05546 | SERPIND1  | NA | Wald ratio                | 1  | 0.280  | 0.208 | 1.795E-01 | 0.956 | pan | Hospitalized COVID-19 |
| 6415_90   | CPN2                              | Carboxypeptidase N subunit 2                                       | P22792 | CPN2      | NA | Inverse variance weighted | 6  | 0.088  | 0.066 | 1.804E-01 | 0.956 | pan | Hospitalized COVID-19 |
| 19117_3   | PP14A                             | Protein phosphatase 1 regulatory subunit 14A                       | Q96A00 | PPP1R14A  | NA | Inverse variance weighted | 2  | 0.189  | 0.141 | 1.810E-01 | 0.956 | pan | Hospitalized COVID-19 |
| 15533_97  | Macrophage scavenger receptor:ECD | Macrophage scavenger receptor types I and II: Extracellular domain | P21757 | MSR1      | NA | Inverse variance weighted | 7  | -0.076 | 0.057 | 1.811E-01 | 0.956 | pan | Hospitalized COVID-19 |
| 15558_63  | AMPE                              | Glutamyl aminopeptidase                                            | Q07075 | ENPEP     | NA | Inverse variance weighted | 8  | 0.037  | 0.028 | 1.826E-01 | 0.956 | pan | Hospitalized COVID-19 |
| 10833_64  | HHIP                              | Hedgehog-interacting protein                                       | Q96QV1 | HHIP      | NA | Inverse variance weighted | 3  | -0.078 | 0.059 | 1.828E-01 | 0.956 | pan | Hospitalized COVID-19 |
| 12556_7   | UBE2C                             | Ubiquitin-conjugating enzyme E2 C                                  | O00762 | UBE2C     | NA | Inverse variance weighted | 2  | 0.123  | 0.093 | 1.829E-01 | 0.956 | pan | Hospitalized COVID-19 |
| 8100_15   | ADM2                              | ADM2                                                               | Q724H4 | ADM2      | NA | Wald ratio                | 1  | 0.288  | 0.216 | 1.829E-01 | 0.956 | pan | Hospitalized COVID-19 |
| 5628_21   | SEM3G                             | Semaphorin-3G                                                      | Q9NS98 | SEMA3G    | NA | Inverse variance weighted | 7  | -0.104 | 0.078 | 1.832E-01 | 0.956 | pan | Hospitalized COVID-19 |
| 6998_106  | HAHA                              | Aspartyl/asparaginyl beta-hydroxylase                              | Q12797 | ASPH      | NA | Inverse variance weighted | 3  | -0.117 | 0.088 | 1.838E-01 | 0.956 | pan | Hospitalized COVID-19 |
| 2968_61   | TNFSF15                           | Tumor necrosis factor ligand superfamily member 15                 | O9S150 | TNFSF15   | NA | Wald ratio                | 1  | -0.251 | 0.189 | 1.845E-01 | 0.956 | pan | Hospitalized COVID-19 |
| 12575_30  | C1TC                              | C-1-tetrahydrofolate synthase, cytoplasmic                         | P11586 | MTFHD1    | NA | Inverse variance weighted | 5  | 0.103  | 0.078 | 1.846E-01 | 0.956 | pan | Hospitalized COVID-19 |
| 11205_10  | Integrin beta-7                   | Integrin beta-7                                                    | P26010 | ITGB7     | NA | Wald ratio                | 1  | 0.295  | 0.222 | 1.848E-01 | 0.956 | pan | Hospitalized COVID-19 |
| 5593_11   | PDIA5                             | Protein disulfide-isomerase A5                                     | Q14554 | PDIA5     | NA | Inverse variance weighted | 11 | -0.042 | 0.032 | 1.850E-01 | 0.956 | pan | Hospitalized COVID-19 |
| 2977_7    | EDAR                              | Tumor necrosis factor receptor superfamily member EDAR             | Q9UNE0 | EDAR      | NA | Inverse variance weighted | 15 | -0.028 | 0.021 | 1.855E-01 | 0.956 | pan | Hospitalized COVID-19 |
| 7957_2    | SCG3                              | Secretogranin-3                                                    | Q8WXD2 | SCG3      | NA | Inverse variance weighted | 10 | -0.038 | 0.029 | 1.876E-01 | 0.956 | pan | Hospitalized COVID-19 |
| 9094_5    | CLC4C                             | C-type lectin domain family 4 member C                             | Q8WTT0 | CLEC4C    | NA | Inverse variance weighted | 19 | -0.067 | 0.051 | 1.877E-01 | 0.956 | pan | Hospitalized COVID-19 |
| 4152_58   | Prekallikrein                     | Plasma kallikrein                                                  | P03952 | KLK81     | NA | Inverse variance weighted | 4  | 0.127  | 0.096 | 1.888E-01 | 0.956 | pan | Hospitalized COVID-19 |
| 13416_8   | T132D                             | Transmembrane protein 132D                                         | Q14C87 | TMEM132D  | NA | Inverse variance weighted | 5  | 0.082  | 0.062 | 1.890E-01 | 0.956 | pan | Hospitalized COVID-19 |
| 15515_2   | SAA                               | Serum amyloid A-1 protein                                          | P0D1I8 | SAA1      | NA | Inverse variance weighted | 5  | -0.102 | 0.078 | 1.890E-01 | 0.956 | pan | Hospitalized COVID-19 |
| 17748_21  | QORX                              | Quinone oxidoreductase PIG3                                        | Q53FA7 | TP53I3    | NA | Inverse variance weighted | 10 | -0.050 | 0.038 | 1.891E-01 | 0.956 | pan | Hospitalized COVID-19 |
| 6626_81   | CHSTC                             | Carbohydrate sulfotransferase 12                                   | Q9NR83 | CHST12    | NA | Inverse variance weighted | 2  | -0.073 | 0.056 | 1.898E-01 | 0.956 | pan | Hospitalized COVID-19 |
| 9312_8    | AZGP1                             | Zinc-alpha-2-glycoprotein                                          | P25311 | AZGP1     | NA | Inverse variance weighted | 4  | -0.190 | 0.145 | 1.903E-01 | 0.956 | pan | Hospitalized COVID-19 |
| 10902_53  | APRV1                             | Retroviral-like aspartic protease 1                                | Q53RT3 | ASPRV1    | NA | Inverse variance weighted | 3  | -0.142 | 0.109 | 1.905E-01 | 0.956 | pan | Hospitalized COVID-19 |
| 9765_4    | NDE1                              | Nuclear distribution protein nudE homolog 1                        | Q9NXR1 | NDE1      | NA | Wald ratio                | 1  | 0.191  | 0.146 | 1.909E-01 | 0.956 | pan | Hospitalized COVID-19 |
| 15653_9   | COAA1                             | Collagen alpha-1(X) chain                                          | Q03692 | COL10A1   | NA | Inverse variance weighted | 4  | -0.068 | 0.052 | 1.921E-01 | 0.956 | pan | Hospitalized COVID-19 |
| 7128_9    | VWA2                              | von Willebrand factor A domain-containing protein 2                | Q5GFL6 | VWA2      | NA | Inverse variance weighted | 7  | 0.069  | 0.053 | 1.922E-01 | 0.956 | pan | Hospitalized COVID-19 |
| 9326_33   | ITI heavy chain H2                | Inter-alpha-trypsin inhibitor heavy chain H2                       | P19823 | ITH2      | NA | Inverse variance weighted | 10 | 0.066  | 0.050 | 1.927E-01 | 0.956 | pan | Hospitalized COVID-19 |
| 12817_1   | GEM                               | GTP-binding protein GEM                                            | P55040 | GEM       | NA | Wald ratio                | 1  | -0.373 | 0.287 | 1.938E-01 | 0.956 | pan | Hospitalized COVID-19 |
| 6064_4    | TXND4                             | Endoplasmic reticulum resident protein 44                          | Q9BS26 | ERP44     | NA | Inverse variance weighted | 3  | 0.169  | 0.130 | 1.939E-01 | 0.956 | pan | Hospitalized COVID-19 |
| 11120_49  | NAT14                             | N-acetyltransferase 14                                             | Q8WUY8 | NAT14     | NA | Wald ratio                | 1  | 0.122  | 0.094 | 1.944E-01 | 0.956 | pan | Hospitalized COVID-19 |
| 11510_31  | Apo L1                            | Apolipoprotein L1                                                  | O14791 | APOL1     | NA | Inverse variance weighted | 8  | -0.036 | 0.028 | 1.947E-01 | 0.956 | pan | Hospitalized COVID-19 |
| 9962_1    | MUCDL                             | Cadherin-related family member 5                                   | Q9HB88 | CDHR5     | NA | Wald ratio                | 1  | -0.236 | 0.182 | 1.950E-01 | 0.956 | pan | Hospitalized COVID-19 |
| 19176_27  | FA49B                             | Protein FAM49B                                                     | Q9NUQ9 | CYRI8     | NA | Wald ratio                | 1  | 0.282  | 0.217 | 1.951E-01 | 0.956 | pan | Hospitalized COVID-19 |
| 9884_8    | PPIL1                             | Peptidyl-prolyl cis-trans isomerase-like 1                         | Q9Y3C6 | PPIL1     | NA | Inverse variance weighted | 9  | 0.038  | 0.029 | 1.960E-01 | 0.956 | pan | Hospitalized COVID-19 |
| 6551_94   | Vaspin                            | Serpin A12                                                         | Q8IW75 | SERPINA12 | NA | Inverse variance weighted | 6  | -0.035 | 0.027 | 1.972E-01 | 0.956 | pan | Hospitalized COVID-19 |
| 5087_5    | IL-22BP                           | Interleukin-22 receptor subunit alpha-2                            | Q969J5 | IL22RA2   | NA | Inverse variance weighted | 19 | 0.052  | 0.040 | 1.973E-01 | 0.956 | pan | Hospitalized COVID-19 |
| 9482_110  | NUDT9                             | ADP-ribose pyrophosphatase, mitochondrial                          | Q9BW91 | NUDT9     | NA | Wald ratio                | 1  | -0.222 | 0.172 | 1.977E-01 | 0.956 | pan | Hospitalized COVID-19 |
| 8427_118  | RSPO3                             | R-spondin-3                                                        | Q9BKX4 | RSPO3     | NA | Inverse variance weighted | 4  | -0.165 | 0.128 | 1.978E-01 | 0.956 | pan | Hospitalized COVID-19 |
| 7989_5    | CA226                             | Uncharacterized protein C1orf226                                   | A11170 | C1orf226  | NA | Wald ratio                | 1  | 0.220  | 0.171 | 1.980E-01 | 0.956 | pan | Hospitalized COVID-19 |
| 4874_3    | Angiogenin                        | Angiogenin                                                         | P03950 | ANG       | NA | Inverse variance weighted | 6  | 0.073  | 0.057 | 1.982E-01 | 0.956 | pan | Hospitalized COVID-19 |
| 17495_141 | SIR3                              | NAD-dependent protein deacetylase sirTuin-3, mitochondrial         | Q9NTG7 | SIRT3     | NA | Inverse variance weighted | 3  | -0.115 | 0.089 | 1.984E-01 | 0.956 | pan | Hospitalized COVID-19 |
| 18909_11  | EXOS8                             | Exosome complex component RRP43                                    | Q96B26 | EXOSC8    | NA | Wald ratio                | 1  | -0.197 | 0.153 | 1.989E-01 | 0.956 | pan | Hospitalized COVID-19 |
| 17726_3   | SAR1A                             | GTP-binding protein SAR1a                                          | Q9NR31 | SAR1A     | NA | Inverse variance weighted | 2  | 0.132  | 0.103 | 1.989E-01 | 0.956 | pan | Hospitalized COVID-19 |
| 9256_78   | NPTX1                             | Neuronal pentraxin-1                                               | Q15818 | NPTX1     | NA | Inverse variance weighted | 9  | -0.041 | 0.032 | 1.992E-01 | 0.956 | pan | Hospitalized COVID-19 |
| 17332_3   | ARHL2                             | Poly(ADP-ribose) glycohydrolase ARH3                               | Q9NX46 | ADPRS     | NA | Inverse variance weighted | 5  | -0.069 | 0.054 | 1.996E-01 | 0.956 | pan | Hospitalized COVID-19 |
| 3184_25   | Coagulation Factor VII            | Coagulation factor VII                                             | P08709 | F7        | NA | Inverse variance weighted | 10 | 0.029  | 0.023 | 2.006E-01 | 0.956 | pan | Hospitalized COVID-19 |
| 19602_36  | jun-D                             | Transcription factor jun-D                                         | P17535 | JUND      | NA | Wald ratio                | 1  | -0.266 | 0.208 | 2.011E-01 | 0.956 | pan | Hospitalized COVID-19 |
| 15316_262 | TXN4B                             | Thioredoxin-like protein 4B                                        | Q9NX01 | TXNL4B    | NA | Inverse variance weighted | 3  | 0.150  | 0.117 | 2.012E-01 | 0.956 | pan | Hospitalized COVID-19 |
| 6049_64   | PTPRS                             | Receptor-type tyrosine-protein phosphatase S                       | Q13332 | PTPRS     | NA | Inverse variance weighted | 4  | -0.110 | 0.087 | 2.018E-01 | 0.956 | pan | Hospitalized COVID-19 |
| 9038_12   | JTB                               | Protein JTB                                                        | O76095 | JTB       | NA | Wald ratio                | 1  | -0.232 | 0.182 | 2.019E-01 | 0.956 | pan | Hospitalized COVID-19 |
| 8299_66   | LIRA4                             | Leukocyte immunoglobulin-like receptor subfamily A member 4        | P55901 | LILRA4    | NA | Inverse variance weighted | 8  | 0.103  | 0.081 | 2.019E-01 | 0.956 | pan | Hospitalized COVID-19 |
| 14012_17  | LGP2                              | Probable ATP-dependent RNA helicase DHX58                          | Q96C10 | DHX58     | NA | Inverse variance weighted | 3  | -0.097 | 0.076 | 2.030E-01 | 0.956 | pan | Hospitalized COVID-19 |
| 14684_17  | CAN2                              | Calpain-2 catalytic subunit                                        | P17655 | CAPN2     | NA | Inverse variance weighted | 2  | -0.166 | 0.130 | 2.034E-01 | 0.956 | pan | Hospitalized COVID-19 |
| 9197_4    | LEG9                              | Galectin-9                                                         | O00182 | LGALS9    | NA | Wald ratio                | 1  | -0.118 | 0.093 | 2.035E-01 | 0.956 | pan | Hospitalized COVID-19 |
| 7857_22   | NEUT                              | Neurotensin/neuromedin N                                           | P30990 | NTS       | NA | Inverse variance weighted | 5  | 0.081  | 0.064 | 2.037E-01 | 0.956 | pan | Hospitalized COVID-19 |
| 18310_26  | SELW                              | Selenoprotein W                                                    | P63302 | SELENOW   | NA | Inverse variance weighted | 8  | 0.050  | 0.040 | 2.048E-01 | 0.956 | pan | Hospitalized COVID-19 |
| 9249_17   | TMEM9:ECD                         | Transmembrane protein 9: Extracellular domain                      | Q9P0T7 | TMEM9     | NA | Inverse variance weighted | 2  | -0.149 | 0.118 | 2.048E-01 | 0.956 | pan | Hospitalized COVID-19 |
| 15529_33  | Cysteine-rich protein 1           | Cysteine and glycine-rich protein 1                                | P21291 | CSR1P     | NA | Inverse variance weighted | 2  | -0.181 | 0.143 | 2.056E-01 | 0.956 | pan | Hospitalized COVID-19 |
| 18921_30  | PHEX                              | Phosphate-regulating neutral endopeptidase                         | P78562 | PHEX      | NA | Wald ratio                | 1  | -0.167 | 0.132 | 2.061E-01 | 0.956 | pan | Hospitalized COVID-19 |
| 5621_64   | THSD1                             | Thrombospondin type-1 domain-containing protein 1                  | Q9NS62 | THSD1     | NA | Inverse variance weighted | 13 | 0.028  | 0.023 | 2.062E-01 | 0.956 | pan | Hospitalized COVID-19 |
| 11241_8   | ARLY                              | Argininosuccinate lyase                                            | P04424 | ASL       | NA | Inverse variance weighted | 7  | -0.098 | 0.078 | 2.067E-01 | 0.956 | pan | Hospitalized COVID-19 |
| 5716_49   | CSAG1                             | Putative chondrosarcoma-associated gene 1 protein                  | Q6PB80 | CSAG1     | NA | Inverse variance weighted | 3  | 0.130  | 0.103 | 2.072E-01 | 0.956 | pan | Hospitalized COVID-19 |
| 6392_7    | WISP-2                            | WNT1-inducible-signaling pathway protein 2                         | O76076 | CN5       | NA | Inverse variance weighted | 8  | 0.037  | 0.030 | 2.072E-01 | 0.956 | pan | Hospitalized COVID-19 |
| 5124_69   | sICAM-5                           | Intercellular adhesion molecule 5                                  | Q9UMF0 | ICAM5     | NA | Inverse variance weighted | 7  | -0.088 | 0.070 | 2.075E-01 | 0.956 | pan | Hospitalized COVID-19 |
| 11369_23  | ADHX                              | Alcohol dehydrogenase class-3                                      | P11766 | ADH5      | NA | Inverse variance weighted | 4  | -0.162 | 0.129 | 2.077E-01 | 0.956 | pan | Hospitalized COVID-19 |
| 3004_67   | PD-L2                             | Programmed cell death 1 ligand 2                                   | Q9BQ51 | PDCD1LG2  | NA | Inverse variance weighted | 6  | -0.035 | 0.028 | 2.084E-01 | 0.956 | pan | Hospitalized COVID-19 |
| 5963_9    | Dermokine                         | Dermokine                                                          | Q6EU04 | DMKN      | NA | Wald ratio                | 1  | -0.241 | 0.192 | 2.093E-01 | 0.956 | pan | Hospitalized COVID-19 |
| 8795_48   | TR:ECD                            | Transferrin receptor protein 1: Extracellular domain               | P02786 | TFR       | NA | Inverse variance weighted | 5  | 0.080  | 0.064 | 2.094E-01 | 0.956 | pan | Hospitalized COVID-19 |
| 18312_68  | NDRG3                             | Protein NDRG3                                                      | Q9UGV2 | NDRG3     | NA | Inverse variance weighted | 3  | -0.132 | 0.106 | 2.103E-01 | 0.956 | pan | Hospitalized COVID-19 |
| 17671_58  | ING4                              | Inhibitor of growth protein 4                                      | Q9UNL4 | ING4      | NA | Inverse variance weighted | 4  | 0.152  | 0.122 | 2.107E-01 | 0.956 | pan | Hospitalized COVID-19 |

|           |                             |                                                                    |        |           |    |                           |    |        |       |           |       |     |                       |
|-----------|-----------------------------|--------------------------------------------------------------------|--------|-----------|----|---------------------------|----|--------|-------|-----------|-------|-----|-----------------------|
| 15641_20  | TEFF1                       | Tomoregulin-1                                                      | Q8IYR6 | TMEFF1    | NA | Wald ratio                | 1  | -0.224 | 0.179 | 2.113E-01 | 0.956 | pan | Hospitalized COVID-19 |
| 14156_33  | 14-3-3 protein beta/alpha   | 14-3-3 protein beta/alpha                                          | P31946 | YWHA8     | NA | Wald ratio                | 1  | 0.229  | 0.184 | 2.122E-01 | 0.956 | pan | Hospitalized COVID-19 |
| 12382_2   | DDX58                       | Probable ATP-dependent RNA helicase DDX58                          | O95786 | DDX58     | NA | Inverse variance weighted | 3  | 0.071  | 0.057 | 2.123E-01 | 0.956 | pan | Hospitalized COVID-19 |
| 12605_1   | Exosome component 3         | Exosome complex component RRP40                                    | Q9NQTS | EXOSC3    | NA | Wald ratio                | 1  | 0.255  | 0.205 | 2.127E-01 | 0.956 | pan | Hospitalized COVID-19 |
| 9901_28   | EGLN1                       | Egl nine homolog 1                                                 | Q9GQT9 | EGLN1     | NA | Inverse variance weighted | 7  | -0.064 | 0.052 | 2.133E-01 | 0.956 | pan | Hospitalized COVID-19 |
| 7009_8    | CD72                        | B-cell differentiation antigen CD72                                | Q21854 | CD72      | NA | Inverse variance weighted | 3  | 0.316  | 0.255 | 2.141E-01 | 0.956 | pan | Hospitalized COVID-19 |
| 15513_108 | Prostasin                   | Prostasin                                                          | Q16651 | PRSS8     | NA | Wald ratio                | 1  | 0.269  | 0.217 | 2.144E-01 | 0.956 | pan | Hospitalized COVID-19 |
| 14094_29  | HB-EGF                      | Heparin-binding EGF-like growth factor                             | O99075 | HBEGF     | NA | Inverse variance weighted | 8  | -0.106 | 0.085 | 2.145E-01 | 0.956 | pan | Hospitalized COVID-19 |
| 10056_5   | FOXM1                       | Forkhead box protein M1                                            | Q08050 | FOXM1     | NA | Wald ratio                | 1  | 0.158  | 0.127 | 2.153E-01 | 0.956 | pan | Hospitalized COVID-19 |
| 8397_147  | QSOX2                       | Sulphydryl oxidase 2                                               | Q6ZRP7 | QSOX2     | NA | Inverse variance weighted | 16 | 0.027  | 0.022 | 2.173E-01 | 0.956 | pan | Hospitalized COVID-19 |
| 3827_22   | PAK6                        | Serine/threonine-protein kinase PAK 6                              | Q9NQUS | PAK6      | NA | Wald ratio                | 1  | -0.076 | 0.061 | 2.175E-01 | 0.956 | pan | Hospitalized COVID-19 |
| 15487_164 | carboxylesterase, liver     | Liver carboxylesterase 1                                           | P23141 | CES1      | NA | Wald ratio                | 1  | 0.269  | 0.218 | 2.175E-01 | 0.956 | pan | Hospitalized COVID-19 |
| 5749_53   | COL                         | Collipase                                                          | P04118 | CLP5      | NA | Inverse variance weighted | 8  | -0.032 | 0.026 | 2.184E-01 | 0.956 | pan | Hospitalized COVID-19 |
| 2730_58   | MICA                        | MHC class I polypeptide-related sequence A                         | Q29983 | MICA      | NA | Inverse variance weighted | 13 | -0.051 | 0.041 | 2.188E-01 | 0.956 | pan | Hospitalized COVID-19 |
| 18380_78  | Albumin                     | Serum albumin                                                      | P02768 | ALB       | NA | Inverse variance weighted | 2  | 0.204  | 0.166 | 2.193E-01 | 0.956 | pan | Hospitalized COVID-19 |
| 15449_33  | TIM-4                       | T-cell immunoglobulin and mucin domain-containing protein 4        | Q96H15 | TIMD4     | NA | Inverse variance weighted | 19 | -0.051 | 0.042 | 2.194E-01 | 0.956 | pan | Hospitalized COVID-19 |
| 3194_36   | GPVI                        | Platelet glycoprotein VI                                           | Q9HCN6 | GP6       | NA | Inverse variance weighted | 2  | -0.135 | 0.110 | 2.198E-01 | 0.956 | pan | Hospitalized COVID-19 |
| 16785_45  | HD-5                        | Defensin-5                                                         | Q01523 | DEF5A     | NA | Inverse variance weighted | 17 | -0.053 | 0.044 | 2.204E-01 | 0.956 | pan | Hospitalized COVID-19 |
| 13545_97  | EIF1A                       | Probable RNA-binding protein EIF1AD                                | Q8N9N8 | EIF1AD    | NA | Inverse variance weighted | 3  | 0.135  | 0.110 | 2.204E-01 | 0.956 | pan | Hospitalized COVID-19 |
| 4155_3    | Tenascin                    | Tenascin                                                           | P24821 | TNC       | NA | Inverse variance weighted | 12 | -0.040 | 0.032 | 2.210E-01 | 0.956 | pan | Hospitalized COVID-19 |
| 2652_15   | suPAR                       | Urokinase plasminogen activator surface receptor                   | Q03405 | PLAUR     | NA | Wald ratio                | 1  | -0.321 | 0.262 | 2.214E-01 | 0.956 | pan | Hospitalized COVID-19 |
| 2972_57   | BMP-7                       | Bone morphogenetic protein 7                                       | P18075 | BMP7      | NA | Wald ratio                | 1  | 0.224  | 0.184 | 2.214E-01 | 0.956 | pan | Hospitalized COVID-19 |
| 16596_25  | GLRX3                       | Glutaredoxin-3                                                     | O76003 | GLRX3     | NA | Wald ratio                | 1  | -0.156 | 0.127 | 2.215E-01 | 0.956 | pan | Hospitalized COVID-19 |
| 2665_26   | BCMA                        | Tumor necrosis factor receptor superfamily member 17               | Q02223 | TNFRSF17  | NA | Inverse variance weighted | 11 | 0.060  | 0.049 | 2.225E-01 | 0.956 | pan | Hospitalized COVID-19 |
| 10600_24  | CLGN                        | Calmequin                                                          | O14967 | CLGN      | NA | Inverse variance weighted | 3  | -0.137 | 0.112 | 2.227E-01 | 0.956 | pan | Hospitalized COVID-19 |
| 4996_66   | HRG                         | Histidine-rich glycoprotein                                        | P04196 | HRG       | NA | Inverse variance weighted | 8  | 0.069  | 0.056 | 2.227E-01 | 0.956 | pan | Hospitalized COVID-19 |
| 12395_86  | SYDM                        | Aspartate-tRNA ligase, mitochondrial                               | Q6PI48 | DARS2     | NA | Wald ratio                | 1  | 0.262  | 0.215 | 2.229E-01 | 0.956 | pan | Hospitalized COVID-19 |
| 9744_139  | DNIA4                       | DnaI homolog subfamily A member 4                                  | Q8WW22 | DNIA4     | NA | Wald ratio                | 1  | 0.211  | 0.173 | 2.233E-01 | 0.956 | pan | Hospitalized COVID-19 |
| 19446_1   | GMPR2                       | GMP reductase 2                                                    | O9P2T1 | GMPR2     | NA | Inverse variance weighted | 2  | 0.057  | 0.047 | 2.236E-01 | 0.956 | pan | Hospitalized COVID-19 |
| 10722_13  | KSYK:Protein Kinase         | Tyrosine-protein kinase SYK:Protein kinase domain                  | P43405 | SYK       | NA | Wald ratio                | 1  | 0.254  | 0.209 | 2.238E-01 | 0.956 | pan | Hospitalized COVID-19 |
| 8817_29   | CENPV                       | Centromere protein V                                               | Q7Z7K6 | CENPV     | NA | Wald ratio                | 1  | -0.262 | 0.216 | 2.239E-01 | 0.956 | pan | Hospitalized COVID-19 |
| 9848_22   | Cyclin H                    | Cyclin-H                                                           | P51946 | CNHN      | NA | Wald ratio                | 1  | -0.148 | 0.122 | 2.239E-01 | 0.956 | pan | Hospitalized COVID-19 |
| 2741_22   | Siglec-6                    | Sialic acid-binding Ig-like lectin 6                               | O43699 | SIGLEC6   | NA | Inverse variance weighted | 7  | -0.057 | 0.047 | 2.267E-01 | 0.964 | pan | Hospitalized COVID-19 |
| 14618_26  | ECOP                        | Vesicular, overexpressed in cancer, prosurvival protein 1          | Q96AW1 | VOPP1     | NA | Inverse variance weighted | 10 | -0.055 | 0.046 | 2.267E-01 | 0.964 | pan | Hospitalized COVID-19 |
| 9815_5    | RHG01:CRAL-TRIO             | Rho GTPase-activating protein 1:Cellular retinaldehyde-TRIO domain | Q07960 | ARHGAP1   | NA | Wald ratio                | 1  | -0.301 | 0.250 | 2.274E-01 | 0.964 | pan | Hospitalized COVID-19 |
| 8296_117  | KDEL2                       | KDEL motif-containing protein 2                                    | Q7Z4H8 | POGLUT3   | NA | Inverse variance weighted | 8  | 0.038  | 0.031 | 2.284E-01 | 0.964 | pan | Hospitalized COVID-19 |
| 12432_23  | CYBP                        | Calcylin-binding protein                                           | Q9HB71 | CACYBP    | NA | Wald ratio                | 1  | -0.175 | 0.145 | 2.294E-01 | 0.964 | pan | Hospitalized COVID-19 |
| 10781_19  | CLC4G                       | C-type lectin domain family 4 member G                             | Q6UX84 | CLEC4G    | NA | Wald ratio                | 1  | -0.250 | 0.208 | 2.295E-01 | 0.964 | pan | Hospitalized COVID-19 |
| 15381_45  | Discoidin domain receptor 2 | Discoidin domain-containing receptor 2                             | Q16832 | DDR2      | NA | Wald ratio                | 1  | 0.244  | 0.204 | 2.297E-01 | 0.964 | pan | Hospitalized COVID-19 |
| 17805_35  | SPF30                       | Survival of motor neuron-related-splicing factor 30                | O75940 | SMNDC1    | NA | Wald ratio                | 1  | -0.272 | 0.227 | 2.297E-01 | 0.964 | pan | Hospitalized COVID-19 |
| 2834_54   | kallikrein 8                | Kallikrein-8                                                       | O60259 | KLK8      | NA | Inverse variance weighted | 3  | 0.077  | 0.064 | 2.298E-01 | 0.964 | pan | Hospitalized COVID-19 |
| 3210_1    | METAP1                      | Methionine aminopeptidase 1                                        | P53582 | METAP1    | NA | Wald ratio                | 1  | 0.267  | 0.222 | 2.302E-01 | 0.964 | pan | Hospitalized COVID-19 |
| 13435_31  | IL-20 Rb                    | Interleukin-20 receptor subunit beta                               | Q6UXLO | IL20RB    | NA | Wald ratio                | 1  | 0.242  | 0.203 | 2.327E-01 | 0.964 | pan | Hospitalized COVID-19 |
| 3326_58   | Nectin-like protein 2       | Cell adhesion molecule 1                                           | Q9BY67 | CADM1     | NA | Wald ratio                | 1  | 0.088  | 0.074 | 2.337E-01 | 0.964 | pan | Hospitalized COVID-19 |
| 7776_20   | UNC5B                       | Netrin receptor UNC5B                                              | Q8I2J1 | UNC5B     | NA | Inverse variance weighted | 3  | -0.141 | 0.119 | 2.338E-01 | 0.964 | pan | Hospitalized COVID-19 |
| 5508_62   | Cathepsin D                 | Cathepsin D                                                        | P07339 | CTSD      | NA | Inverse variance weighted | 6  | 0.066  | 0.055 | 2.339E-01 | 0.964 | pan | Hospitalized COVID-19 |
| 14204_55  | FOXJ2                       | Forkhead box protein J2                                            | Q9P0K8 | FOXJ2     | NA | Inverse variance weighted | 2  | -0.166 | 0.140 | 2.341E-01 | 0.964 | pan | Hospitalized COVID-19 |
| 14121_24  | TRAIL R4                    | Tumor necrosis factor receptor superfamily member 10D              | Q9UBN6 | TNFRSF10D | NA | Wald ratio                | 1  | 0.303  | 0.255 | 2.342E-01 | 0.964 | pan | Hospitalized COVID-19 |
| 13700_10  | annexin II                  | Annexin A2                                                         | P07355 | ANXA2     | NA | Inverse variance weighted | 8  | -0.074 | 0.062 | 2.343E-01 | 0.964 | pan | Hospitalized COVID-19 |
| 5095_21   | KI2LA                       | Killer cell immunoglobulin-like receptor 2DL4                      | O99706 | KIR2DL4   | NA | Wald ratio                | 1  | -0.194 | 0.163 | 2.347E-01 | 0.964 | pan | Hospitalized COVID-19 |
| 3518_54   | TAFI                        | Carboxypeptidase B2                                                | Q96IY4 | CPB2      | NA | Inverse variance weighted | 8  | 0.073  | 0.062 | 2.351E-01 | 0.964 | pan | Hospitalized COVID-19 |
| 13659_36  | AT131                       | Manganese-transporting ATPase 13A1                                 | Q9HD20 | ATP13A1   | NA | Inverse variance weighted | 2  | 0.182  | 0.153 | 2.352E-01 | 0.964 | pan | Hospitalized COVID-19 |
| 3220_40   | RET                         | Proto-oncogene tyrosine-protein kinase receptor Ret                | P07949 | RET       | NA | Inverse variance weighted | 5  | 0.040  | 0.033 | 2.357E-01 | 0.964 | pan | Hospitalized COVID-19 |
| 12366_16  | CRGD                        | Gamma-crystallin D                                                 | P07320 | CRYGD     | NA | Wald ratio                | 1  | 0.113  | 0.096 | 2.366E-01 | 0.964 | pan | Hospitalized COVID-19 |
| 6965_19   | CNTP2                       | Contactin-associated protein-like 2                                | Q9UHC6 | CNTNAP2   | NA | Inverse variance weighted | 6  | 0.039  | 0.033 | 2.368E-01 | 0.964 | pan | Hospitalized COVID-19 |
| 18878_15  | GREM1                       | Gremlin-1                                                          | O60565 | GREM1     | NA | Inverse variance weighted | 10 | -0.027 | 0.023 | 2.369E-01 | 0.964 | pan | Hospitalized COVID-19 |
| 16302_11  | SPLC2                       | BPI fold-containing family A member 2                              | Q96DR5 | BP1FA2    | NA | Wald ratio                | 1  | -0.189 | 0.160 | 2.373E-01 | 0.964 | pan | Hospitalized COVID-19 |
| 14153_8   | Ephrin-A3                   | Ephrin-A3                                                          | P52797 | EFNA3     | NA | Wald ratio                | 1  | 0.211  | 0.179 | 2.374E-01 | 0.964 | pan | Hospitalized COVID-19 |
| 2962_50   | PTHrP                       | Parathyroid hormone-related protein                                | P12272 | PTHLL     | NA | Inverse variance weighted | 3  | 0.089  | 0.075 | 2.388E-01 | 0.965 | pan | Hospitalized COVID-19 |
| 8877_22   | F176C:CD                    | Protein eva-1 homolog C:Extracellular domain                       | P58658 | EVA1C     | NA | Wald ratio                | 1  | -0.192 | 0.163 | 2.392E-01 | 0.965 | pan | Hospitalized COVID-19 |
| 19169_88  | FIBP                        | Acidic fibroblast growth factor intracellular-binding protein      | O43427 | FIBP      | NA | Wald ratio                | 1  | -0.157 | 0.134 | 2.400E-01 | 0.965 | pan | Hospitalized COVID-19 |
| 17325_10  | KGUA                        | Guanylate kinase                                                   | Q16774 | GUK1      | NA | Inverse variance weighted | 6  | -0.051 | 0.043 | 2.406E-01 | 0.965 | pan | Hospitalized COVID-19 |
| 11208_15  | NAGPA                       | N-acetylglucosamine-1-phosphodiester alpha-N-acetylglucosaminidase | Q9UK23 | NAGPA     | NA | Inverse variance weighted | 7  | 0.030  | 0.026 | 2.413E-01 | 0.965 | pan | Hospitalized COVID-19 |
| 3396_54   | Renin                       | Renin                                                              | P00797 | REN       | NA | Inverse variance weighted | 7  | -0.083 | 0.071 | 2.413E-01 | 0.965 | pan | Hospitalized COVID-19 |
| 3042_7    | Myoglobin                   | Myoglobin                                                          | P02144 | MB        | NA | Inverse variance weighted | 2  | 0.343  | 0.293 | 2.415E-01 | 0.965 | pan | Hospitalized COVID-19 |
| 15453_3   | a1-Microglobulin            | Alpha-1-microglobulin                                              | P02760 | AMB       | NA | Wald ratio                | 1  | 0.208  | 0.178 | 2.417E-01 | 0.965 | pan | Hospitalized COVID-19 |
| 13943_38  | DPY30                       | Protein dpy-30 homolog                                             | Q9C005 | DPY30     | NA | Inverse variance weighted | 2  | -0.171 | 0.146 | 2.418E-01 | 0.965 | pan | Hospitalized COVID-19 |
| 6525_17   | DUSP13                      | Dual specificity protein phosphatase 13 isoform A                  | Q68811 | DUSP13    | NA | Inverse variance weighted | 3  | 0.044  | 0.037 | 2.423E-01 | 0.965 | pan | Hospitalized COVID-19 |
| 7185_29   | GPV                         | Platelet glycoprotein V                                            | P40197 | GP5       | NA | Inverse variance weighted | 2  | -0.121 | 0.104 | 2.424E-01 | 0.965 | pan | Hospitalized COVID-19 |
| 7955_195  | ITI heavy chain H1          | Inter-alpha-trypsin inhibitor heavy chain H1                       | P19827 | ITH1      | NA | Inverse variance weighted | 3  | 0.291  | 0.250 | 2.431E-01 | 0.965 | pan | Hospitalized COVID-19 |
| 15347_12  | Hemopexin                   | Hemopexin                                                          | P02790 | HPX       | NA | Wald ratio                | 1  | -0.278 | 0.238 | 2.439E-01 | 0.965 | pan | Hospitalized COVID-19 |
| 13472_35  | HDHD2                       | Haloacid dehalogenase-like hydrolase domain-containing protein 2   | Q9H0R4 | HDHD2     | NA | Inverse variance weighted | 3  | 0.056  | 0.048 | 2.445E-01 | 0.965 | pan | Hospitalized COVID-19 |
| 17781_191 | MLPSA                       | Microtubule-associated proteins 1A/1B light chain 3A               | Q9H492 | MAP1LC3A  | NA | Inverse variance weighted | 8  | 0.086  | 0.074 | 2.449E-01 | 0.965 | pan | Hospitalized COVID-19 |
| 15304_1   | PAP1                        | Regenerating islet-derived protein 3-alpha                         | Q06141 | REG3A     | NA | Inverse variance weighted | 15 | 0.062  | 0.053 | 2.450E-01 | 0.965 | pan | Hospitalized COVID-19 |
| 5631_83   | MOT1                        | Promotilin                                                         | P12872 | MLN       | NA | Inverse variance weighted | 26 | -0.030 | 0.025 | 2.453E-01 | 0.965 | pan | Hospitalized COVID-19 |
| 4234_8    | IL-1 R4                     | Interleukin-1 receptor-like 1                                      | Q01638 | IL1RL1    | NA | Inverse variance weighted | 24 | -0.027 | 0.024 | 2.463E-01 | 0.965 | pan | Hospitalized COVID-19 |
| 11872_9   | PCDGD                       | Protocadherin gamma-B1                                             | Q9Y5G3 | PCDHGB1   | NA | Inverse variance weighted | 2  | 0.220  | 0.190 | 2.465E-01 | 0.965 | pan | Hospitalized COVID-19 |
| 14208_3   | RET7                        | Retinoid-binding protein 7                                         | Q96R05 | RBP7      | NA | Inverse variance weighted | 2  | -0.103 | 0.089 | 2.467E-01 | 0.965 | pan | Hospitalized COVID-19 |

|           |                             |                                                                                                |        |          |    |                           |    |        |       |           |       |     |                       |
|-----------|-----------------------------|------------------------------------------------------------------------------------------------|--------|----------|----|---------------------------|----|--------|-------|-----------|-------|-----|-----------------------|
| 5121_3    | SEM6B                       | Semaphorin-6B                                                                                  | Q9H3T3 | SEMA6B   | NA | Inverse variance weighted | 2  | 0.152  | 0.131 | 2.479E-01 | 0.965 | pan | Hospitalized COVID-19 |
| 4920_10   | Lysozyme                    | Lysozyme C                                                                                     | P61626 | LYZ      | NA | Inverse variance weighted | 10 | -0.037 | 0.032 | 2.489E-01 | 0.965 | pan | Hospitalized COVID-19 |
| 2939_10   | Artemin                     | Artemin                                                                                        | Q5T4W7 | ARTN     | NA | Wald ratio                | 1  | 0.263  | 0.228 | 2.492E-01 | 0.965 | pan | Hospitalized COVID-19 |
| 17454_15  | EGFL6                       | Epidermal growth factor-like protein 6                                                         | Q8IUX8 | EGFL6    | NA | Inverse variance weighted | 5  | 0.121  | 0.105 | 2.495E-01 | 0.965 | pan | Hospitalized COVID-19 |
| 19365_11  | BCAT2                       | Branched-chain-amino-acid aminotransferase, mitochondrial                                      | O15382 | BCAT2    | NA | Inverse variance weighted | 2  | 0.087  | 0.076 | 2.497E-01 | 0.965 | pan | Hospitalized COVID-19 |
| 7648_9    | MYP1C1                      | Myosin-binding protein C, slow-type                                                            | Q00872 | MYBPC1   | NA | Inverse variance weighted | 2  | -0.187 | 0.163 | 2.503E-01 | 0.965 | pan | Hospitalized COVID-19 |
| 18832_65  | SAA2                        | Serum amyloid A-2 protein                                                                      | P0D1I9 | SAA2     | NA | Inverse variance weighted | 3  | -0.320 | 0.279 | 2.512E-01 | 0.965 | pan | Hospitalized COVID-19 |
| 3049_61   | Trypsin                     | Trypsin-1                                                                                      | P07477 | PRSS1    | NA | Inverse variance weighted | 4  | 0.212  | 0.185 | 2.513E-01 | 0.965 | pan | Hospitalized COVID-19 |
| 9265_10   | GLP1                        | Glioma pathogenesis-related protein 1                                                          | P48060 | GLP1R1   | NA | Wald ratio                | 1  | -0.131 | 0.114 | 2.514E-01 | 0.965 | pan | Hospitalized COVID-19 |
| 8080_24   | PSMP                        | Prostate-associated microseminoprotein                                                         | Q116U9 | MSMP     | NA | Inverse variance weighted | 15 | -0.051 | 0.044 | 2.515E-01 | 0.965 | pan | Hospitalized COVID-19 |
| 8484_24   | Leptin                      | Leptin                                                                                         | P41159 | LEP      | NA | Inverse variance weighted | 4  | 0.120  | 0.104 | 2.518E-01 | 0.965 | pan | Hospitalized COVID-19 |
| 3431_54   | EphA1                       | Ephrin type-A receptor 1                                                                       | P21709 | EPHA1    | NA | Inverse variance weighted | 10 | -0.021 | 0.018 | 2.519E-01 | 0.965 | pan | Hospitalized COVID-19 |
| 3773_15   | sTie-2                      | Angiopoietin-1 receptor, soluble                                                               | Q02763 | TEK      | NA | Inverse variance weighted | 5  | 0.053  | 0.046 | 2.523E-01 | 0.965 | pan | Hospitalized COVID-19 |
| 6081_52   | PCOC2                       | Procollagen C-endopeptidase enhancer 2                                                         | Q9UKZ9 | PCOLCE2  | NA | Inverse variance weighted | 15 | -0.024 | 0.021 | 2.535E-01 | 0.966 | pan | Hospitalized COVID-19 |
| 12703_6   | NEK7                        | Serine/threonine-protein kinase Nek7                                                           | Q8TDX7 | NEK7     | NA | Wald ratio                | 1  | -0.097 | 0.085 | 2.537E-01 | 0.966 | pan | Hospitalized COVID-19 |
| 5480_49   | RANTES                      | C-C motif chemokine 5                                                                          | P13501 | CCL5     | NA | Inverse variance weighted | 2  | 0.241  | 0.211 | 2.539E-01 | 0.966 | pan | Hospitalized COVID-19 |
| 8476_11   | CgA                         | Chromogranin-A                                                                                 | P10645 | CHGA     | NA | Inverse variance weighted | 6  | 0.085  | 0.075 | 2.546E-01 | 0.966 | pan | Hospitalized COVID-19 |
| 11302_237 | TENR                        | Tenascin-R                                                                                     | Q92752 | TNR      | NA | Inverse variance weighted | 3  | 0.100  | 0.087 | 2.548E-01 | 0.966 | pan | Hospitalized COVID-19 |
| 5349_69   | DLL1                        | Delta-like protein 1                                                                           | 000548 | DLL1     | NA | Inverse variance weighted | 3  | 0.091  | 0.080 | 2.551E-01 | 0.966 | pan | Hospitalized COVID-19 |
| 2637_77   | Macrophage mannose receptor | Macrophage mannose receptor 1                                                                  | P22897 | MRC1     | NA | Inverse variance weighted | 15 | 0.037  | 0.033 | 2.564E-01 | 0.969 | pan | Hospitalized COVID-19 |
| 11117_2   | SPT20                       | Spermatogenesis-associated protein 20                                                          | Q8TB22 | SPATA20  | NA | Inverse variance weighted | 4  | -0.044 | 0.039 | 2.585E-01 | 0.972 | pan | Hospitalized COVID-19 |
| 14623_26  | SUMO3                       | Small ubiquitin-related modifier 3                                                             | P55854 | SUMO3    | NA | Wald ratio                | 1  | -0.222 | 0.197 | 2.585E-01 | 0.972 | pan | Hospitalized COVID-19 |
| 8403_18   | Fatty acid synthase         | Fatty acid synthase                                                                            | P49327 | FASN     | NA | Wald ratio                | 1  | 0.082  | 0.073 | 2.592E-01 | 0.972 | pan | Hospitalized COVID-19 |
| 15580_2   | EPHA7                       | Ephrin type-A receptor 7                                                                       | Q15375 | EPHA7    | NA | Wald ratio                | 1  | -0.041 | 0.037 | 2.597E-01 | 0.972 | pan | Hospitalized COVID-19 |
[truncated: 1,026,999 more chars]
